# Supplementary material for: Inflation vs. Exhaustion of Antiviral CD8+ T-Cell Populations in Persistent Infections: Two Sides of the Same Coin?
Source: PubMed Central journal article supplement (PMC6414785; doi:10.3389/fimmu.2019.00197), 2019-03-06
Supplement: Table_3.pdf [file Table_3.pdf]

Table S3

| NAME                                             | GS<br>NES                                        | follow link to MSigDB<br>NOM p-val | GS DETAILS<br>FDR q-val | SIZE<br>FWER p-val |
|--------------------------------------------------|--------------------------------------------------|------------------------------------|-------------------------|--------------------|
| RANK AT MAX                                      | LEADING EDGE                                     |                                    |                         |                    |
| REACTOME_DNA_REPLICATION                         | REACTOME_DNA_REPLICATION                         | Details ...                        |                         |                    |
| 161                                              | 0.78869563                                       | 2.5848584                          | 0                       | 0                  |
| 2765                                             | "tags=83%, list=17%, signal=99%"                 |                                    |                         |                    |
| REACTOME_MITOTIC_M_M_G1_PHASES                   | REACTOME_MITOTIC_M_M_G1_PHASES                   | Details ...                        |                         |                    |
| 0                                                | 2765                                             | 143                                | 0.78841156              | 2.5204270          |
| 0                                                | "tags=82%, list=17%, signal=98%"                 |                                    |                         |                    |
| REACTOME_CELL_CYCLE_MITOTIC                      | REACTOME_CELL_CYCLE_MITOTIC                      | Details ...                        |                         |                    |
| 0                                                | 0                                                | 260                                | 0.7375567               | 2.4846542          |
| 0                                                | "tags=70%, list=17%, signal=83%"                 |                                    |                         |                    |
| REACTOME_G1_S_TRANSITION                         | REACTOME_G1_S_TRANSITION                         | Details ...                        |                         |                    |
| 92                                               | 0.7910559                                        | 2.4551210                          | 0                       | 0                  |
| 2738                                             | "tags=85%, list=17%, signal=102%"                |                                    |                         |                    |
| REACTOME_CELL_CYCLE                              | REACTOME_CELL_CYCLE                              | Details ...                        |                         |                    |
| 316                                              | 0.7305762                                        | 2.4511210                          | 0                       | 0                  |
| 2706                                             | "tags=66%, list=17%, signal=78%"                 |                                    |                         |                    |
| REACTOME_S_PHASE                                 | REACTOME_S_PHASE                                 | Details ...                        | 91                      |                    |
| 0.7886546                                        | 2.4393938                                        | 0                                  | 0                       | 0                  |
| 2690                                             | "tags=85%, list=17%, signal=101%"                |                                    |                         |                    |
| REACTOME_CELL_CYCLE_CHECKPOINTS                  | REACTOME_CELL_CYCLE_CHECKPOINTS                  | Details ...                        |                         |                    |
| 0                                                | 0                                                | 96                                 | 0.77978736              | 2.4209056          |
| 0                                                | "tags=79%, list=17%, signal=94%"                 |                                    |                         |                    |
| REACTOME_SYNTHESIS_OF_DNA                        | REACTOME_SYNTHESIS_OF_DNA                        | Details ...                        |                         |                    |
| 78                                               | 0.80050945                                       | 2.4191465                          | 0                       | 0                  |
| 2690                                             | "tags=88%, list=17%, signal=106%"                |                                    |                         |                    |
| REACTOME_M_G1_TRANSITION                         | REACTOME_M_G1_TRANSITION                         | Details ...                        |                         |                    |
| 67                                               | 0.81085366                                       | 2.4167511                          | 0                       | 0                  |
| 2668                                             | "tags=90%, list=17%, signal=107%"                |                                    |                         |                    |
| REACTOME_MITOTIC_G1_G1_S_PHASES                  | REACTOME_MITOTIC_G1_G1_S_PHASES                  | Details ...                        |                         |                    |
| 0                                                | 0                                                | 112                                | 0.7584441               | 2.4039187          |
| 0                                                | "tags=77%, list=17%, signal=92%"                 |                                    |                         |                    |
| REACTOME_MITOTIC_PROMETAPHASE                    | REACTOME_MITOTIC_PROMETAPHASE                    | Details ...                        |                         |                    |
| 0                                                | 1954                                             | 73                                 | 0.78409654              | 2.3797410          |
| 0                                                | "tags=67%, list=12%, signal=76%"                 |                                    |                         |                    |
| REACTOME_REGULATION_OF_MITOTIC_CELL_CYCLE        | REACTOME_REGULATION_OF_MITOTIC_CELL_CYCLE        | Details ...                        | 71                      |                    |
| 0.7838498                                        | 2.3530934                                        | 0                                  | 0                       | 0                  |
| 2668                                             | "tags=76%, list=17%, signal=91%"                 |                                    |                         |                    |
| REACTOME_HOST_INTERACTIONS_OF_HIV_FACTORS        | REACTOME_HOST_INTERACTIONS_OF_HIV_FACTORS        | Details ...                        | 107                     |                    |
| 0.73496544                                       | 2.3394303                                        | 0                                  | 0                       | 0                  |
| 3093                                             | "tags=71%, list=19%, signal=87%"                 |                                    |                         |                    |
| REACTOME_ASSEMBLY_OF_THE_PRE_REPLICATIVE_COMPLEX | REACTOME_ASSEMBLY_OF_THE_PRE_REPLICATIVE_COMPLEX | Details ...                        |                         |                    |
| 54                                               | 0.802842                                         | 2.3383176                          | 0                       | 0                  |
| 2668                                             | "tags=87%, list=17%, signal=104%"                |                                    |                         |                    |
| REACTOME_MEIOTIC_RECOMBINATION                   | REACTOME_MEIOTIC_RECOMBINATION                   | Details ...                        |                         |                    |
| 0                                                | 0                                                | 50                                 | 0.8093249               | 2.3278651          |
| 0                                                | "tags=58%, list=6%, signal=62%"                  |                                    |                         |                    |
| REACTOME_CHROMOSOME_MAINTENANCE                  | REACTOME_CHROMOSOME_MAINTENANCE                  | Details ...                        |                         |                    |
| 0                                                | 0                                                | 83                                 | 0.7562414               | 2.3254275          |
| 0                                                | "tags=58%, list=6%, signal=62%"                  |                                    |                         |                    |

|                                                                      |                                   |                                  |                                   |                                 |   |
|----------------------------------------------------------------------|-----------------------------------|----------------------------------|-----------------------------------|---------------------------------|---|
| 0                                                                    | 0                                 | 2249                             | "tags=66%, list=14%, signal=77%"  |                                 |   |
| REACTOME_APC_C_CDC20_MEDIATED_DEGRADATION_OF_MITOTIC_PROTEINS        |                                   |                                  |                                   |                                 |   |
| REACTOME_APC_C_CDC20_MEDIATED_DEGRADATION_OF_MITOTIC_PROTEINS        |                                   |                                  |                                   |                                 |   |
| Details ...                                                          | 61                                | 0.7811348                        | 2.3230066                         | 0                               |   |
| 0                                                                    | 0                                 | 2668                             | "tags=79%, list=17%, signal=94%"  |                                 |   |
| REACTOME_TELOMERE_MAINTENANCE REACTOME_TELOMERE_MAINTENANCE          |                                   |                                  |                                   |                                 |   |
| Details ...                                                          | 51                                | 0.80506754                       | 2.3171136                         | 0                               |   |
| 0                                                                    | 0                                 | 2249                             | "tags=80%, list=14%, signal=93%"  |                                 |   |
| REACTOME_DEPOSITION_OF_NEW_CENPA_CONTAINING_NUCLEOSOMES_AT_THE_CENTR |                                   |                                  |                                   |                                 |   |
| OMERE                                                                |                                   |                                  |                                   |                                 |   |
| REACTOME_DEPOSITION_OF_NEW_CENPA_CONTAINING_NUCLEOSOMES_AT_THE_CENTR |                                   |                                  |                                   |                                 |   |
| OMERE                                                                |                                   |                                  |                                   |                                 |   |
| Details ...                                                          | 34                                | 0.8541647                        | 2.3165529                         |                                 |   |
| 0                                                                    | 0                                 | 0                                | 998                               | "tags=71%, list=6%, signal=75%" |   |
| REACTOME_RESPIRATORY_ELECTRON_TRANSPORT_ATP_SYNTHESIS_BY_CHEMIOSMOTI |                                   |                                  |                                   |                                 |   |
| C_COUPLING_AND_HEAT_PRODUCTION_BY_UNCOUPLING_PROTEINS_               |                                   |                                  |                                   |                                 |   |
| REACTOME_RESPIRATORY_ELECTRON_TRANSPORT_ATP_SYNTHESIS_BY_CHEMIOSMOTI |                                   |                                  |                                   |                                 |   |
| C_COUPLING_AND_HEAT_PRODUCTION_BY_UNCOUPLING_PROTEINS_               |                                   |                                  |                                   |                                 |   |
| Details ...                                                          | 68                                | 0.77703553                       | 2.3080008                         | 0                               |   |
| 0                                                                    | 0                                 | 2924                             | "tags=85%, list=18%, signal=104%" |                                 |   |
| REACTOME_RNA_POL_I_PROMOTER_OPENING                                  |                                   |                                  |                                   |                                 |   |
| REACTOME_RNA_POL_I_PROMOTER_OPENING                                  |                                   |                                  |                                   |                                 |   |
| 0.8706158                                                            | 2.2984710                         | 0                                | 0                                 | 30                              |   |
| 1003                                                                 | "tags=73%, list=6%, signal=78%"   |                                  |                                   |                                 |   |
| REACTOME_TCA_CYCLE_AND_RESPIRATORY_ELECTRON_TRANSPORT                |                                   |                                  |                                   |                                 |   |
| REACTOME_TCA_CYCLE_AND_RESPIRATORY_ELECTRON_TRANSPORT                |                                   |                                  |                                   |                                 |   |
| 98                                                                   | 0.7268342                         | 2.2933068                        | 0                                 | 0                               | 0 |
| 2973                                                                 | "tags=78%, list=18%, signal=95%"  |                                  |                                   |                                 |   |
| REACTOME_ER_PHAGOSOME_PATHWAY REACTOME_ER_PHAGOSOME_PATHWAY          |                                   |                                  |                                   |                                 |   |
| 0                                                                    | 50                                | 0.7840883                        | 2.2895174                         | 0                               | 0 |
| 0                                                                    | 2668                              | "tags=82%, list=17%, signal=98%" |                                   |                                 |   |
| REACTOME_ORC1_REMOVAL_FROM_CHROMATIN                                 |                                   |                                  |                                   |                                 |   |
| REACTOME_ORC1_REMOVAL_FROM_CHROMATIN                                 |                                   |                                  |                                   |                                 |   |
| 0.7865059                                                            | 2.2866470                         | 0                                | 0                                 | 56                              |   |
| 2668                                                                 | "tags=84%, list=17%, signal=100%" |                                  |                                   |                                 |   |
| REACTOME_APC_C_CDH1_MEDIATED_DEGRADATION_OF_CDC20_AND_OTHER_APC_C_CD |                                   |                                  |                                   |                                 |   |
| H1_TARGETED_PROTEINS_IN_LATE_MITOSIS_EARLY_G1                        |                                   |                                  |                                   |                                 |   |
| REACTOME_APC_C_CDH1_MEDIATED_DEGRADATION_OF_CDC20_AND_OTHER_APC_C_CD |                                   |                                  |                                   |                                 |   |
| H1_TARGETED_PROTEINS_IN_LATE_MITOSIS_EARLY_G1                        |                                   |                                  |                                   |                                 |   |
| 0.7776883                                                            | 2.2833645                         | 0                                | 0                                 | 60                              |   |
| 2668                                                                 | "tags=78%, list=17%, signal=94%"  |                                  |                                   |                                 |   |
| REACTOME_CDK_MEDIATED_PHOSPHORYLATION_AND_REMOVAL_OF_CDC6            |                                   |                                  |                                   |                                 |   |
| REACTOME_CDK_MEDIATED_PHOSPHORYLATION_AND_REMOVAL_OF_CDC6            |                                   |                                  |                                   |                                 |   |
| 43                                                                   | 0.7909794                         | 2.2752893                        | 0                                 | 0                               | 0 |
| 2668                                                                 | "tags=86%, list=17%, signal=103%" |                                  |                                   |                                 |   |
| REACTOME_RESPIRATORY_ELECTRON_TRANSPORT                              |                                   |                                  |                                   |                                 |   |
| REACTOME_RESPIRATORY_ELECTRON_TRANSPORT                              |                                   |                                  |                                   |                                 |   |
| 0.7702804                                                            | 2.2692463                         | 0                                | 0                                 | 54                              |   |
| 2924                                                                 | "tags=85%, list=18%, signal=104%" |                                  |                                   |                                 |   |
| REACTOME_CDT1_ASSOCIATION_WITH_THE_CDC6_ORC_ORIGIN_COMPLEX           |                                   |                                  |                                   |                                 |   |
| REACTOME_CDT1_ASSOCIATION_WITH_THE_CDC6_ORC_ORIGIN_COMPLEX           |                                   |                                  |                                   |                                 |   |
| 45                                                                   | 0.78918034                        | 2.2586434                        | 0                                 | 0                               | 0 |
| 2668                                                                 | "tags=84%, list=17%, signal=101%" |                                  |                                   |                                 |   |
| REACTOME_CYCLIN_E_ASSOCIATED_EVENTS_DURING_G1_S_TRANSITION_          |                                   |                                  |                                   |                                 |   |
| REACTOME_CYCLIN_E_ASSOCIATED_EVENTS_DURING_G1_S_TRANSITION_          |                                   |                                  |                                   |                                 |   |

|      |                                                                     |                                   |           |   |     |
|------|---------------------------------------------------------------------|-----------------------------------|-----------|---|-----|
| 58   | 0.76881486                                                          | 2.2541435                         | 0         | 0 | 0   |
| 2668 | "tags=79%, list=17%, signal=95%"                                    |                                   |           |   |     |
|      | REACTOME_SCF_BETA_TRCP_MEDIATED_DEGRADATION_OF_EMI1                 |                                   |           |   |     |
|      | REACTOME_SCF_BETA_TRCP_MEDIATED_DEGRADATION_OF_EMI1                 |                                   |           |   |     |
| 45   | 0.7882718                                                           | 2.2519166                         | 0         | 0 | 0   |
| 2668 | "tags=82%, list=17%, signal=98%"                                    |                                   |           |   |     |
|      | REACTOME_SCFSKP2_MEDIATED_DEGRADATION_OF_P27_P21                    |                                   |           |   |     |
|      | REACTOME_SCFSKP2_MEDIATED_DEGRADATION_OF_P27_P21                    |                                   |           |   |     |
|      | 0.77751833                                                          | 2.2404475                         | 0         | 0 | 50  |
| 2668 | "tags=82%, list=17%, signal=98%"                                    |                                   |           |   |     |
|      | REACTOME_G2_M_CHECKPOINTS REACTOME_G2_M_CHECKPOINTS                 |                                   |           |   |     |
|      | 0.8458865                                                           | 2.2397203                         | 0         | 0 | 30  |
| 1538 | "tags=80%, list=10%, signal=88%"                                    |                                   |           |   |     |
|      | REACTOME_AUTODEGRADATION_OF_CDH1_BY_CDH1_APC_C                      |                                   |           |   |     |
|      | REACTOME_AUTODEGRADATION_OF_CDH1_BY_CDH1_APC_C                      |                                   |           |   |     |
|      | 0.77187735                                                          | 2.2342322                         | 0         | 0 | 54  |
| 2668 | "tags=78%, list=17%, signal=93%"                                    |                                   |           |   |     |
|      | REACTOME_DNA_STRAND_ELONGATION REACTOME_DNA_STRAND_ELONGATION       |                                   |           |   |     |
|      | 27                                                                  | 0.84076446                        | 2.2288375 | 0 | 0   |
| 0    | 2249                                                                | "tags=93%, list=14%, signal=107%" |           |   |     |
|      | REACTOME_AMYLOIDS REACTOME_AMYLOIDS                                 |                                   |           |   |     |
|      | 0.79445565                                                          | 2.2211552                         | 0         | 0 | 46  |
| 1003 | "tags=46%, list=6%, signal=49%"                                     |                                   |           |   |     |
|      | REACTOME_SIGNALING_BY_WNT REACTOME_SIGNALING_BY_WNT                 |                                   |           |   |     |
|      | 0.75162977                                                          | 2.2064720                         | 0         | 0 | 56  |
| 3053 | "tags=80%, list=19%, signal=99%"                                    |                                   |           |   |     |
|      | REACTOME_P53_DEPENDENT_G1_DNA_DAMAGE_RESPONSE                       |                                   |           |   |     |
|      | REACTOME_P53_DEPENDENT_G1_DNA_DAMAGE_RESPONSE                       |                                   |           |   |     |
|      | 0.75394356                                                          | 2.2016776                         | 0         | 0 | 49  |
| 2668 | "tags=80%, list=17%, signal=95%"                                    |                                   |           |   |     |
|      | REACTOME_REGULATION_OF_APOPTOSIS REACTOME_REGULATION_OF_APOPTOSIS   |                                   |           |   |     |
|      | 51                                                                  | 0.76376444                        | 2.2012720 | 0 | 0   |
| 2668 | "tags=75%, list=17%, signal=89%"                                    |                                   |           |   |     |
|      | REACTOME_DESTABILIZATION_OF_MRNA_BY_AUF1_HNRNP_D0                   |                                   |           |   |     |
|      | REACTOME_DESTABILIZATION_OF_MRNA_BY_AUF1_HNRNP_D0                   |                                   |           |   |     |
|      | 0.77340597                                                          | 2.1961904                         | 0         | 0 | 46  |
| 2668 | "tags=80%, list=17%, signal=96%"                                    |                                   |           |   |     |
|      | REACTOME_P53_INDEPENDENT_G1_S_DNA_DAMAGE_CHECKPOINT                 |                                   |           |   |     |
|      | REACTOME_P53_INDEPENDENT_G1_S_DNA_DAMAGE_CHECKPOINT                 |                                   |           |   |     |
| 45   | 0.77980363                                                          | 2.1932652                         | 0         | 0 | 0   |
| 2668 | "tags=84%, list=17%, signal=101%"                                   |                                   |           |   |     |
|      | REACTOME_HIV_INFECTION REACTOME_HIV_INFECTION                       |                                   |           |   |     |
|      | 0.6647168                                                           | 2.1860485                         | 0         | 0 | 167 |
| 2668 | "tags=57%, list=17%, signal=68%"                                    |                                   |           |   |     |
|      | REACTOME_ACTIVATION_OF_ATR_IN_RESPONSE_TO_REPLICATION_STRESS        |                                   |           |   |     |
|      | REACTOME_ACTIVATION_OF_ATR_IN_RESPONSE_TO_REPLICATION_STRESS        |                                   |           |   |     |
|      | 25                                                                  | 0.8510356                         | 2.1837802 | 0 | 0   |
| 0    | 2087                                                                | "tags=88%, list=13%, signal=101%" |           |   |     |
|      | REACTOME_CROSS_PRESENTATION_OF_SOLUBLE_EXOGENOUS_ANTIGENS_ENDOSOMES |                                   |           |   |     |
|      | REACTOME_CROSS_PRESENTATION_OF_SOLUBLE_EXOGENOUS_ANTIGENS_ENDOSOMES |                                   |           |   |     |
|      | 43                                                                  | 0.7877412                         | 2.1805656 | 0 | 0   |
| 2668 | "tags=81%, list=17%, signal=97%"                                    |                                   |           |   |     |
|      | REACTOME_RNA_POL_I_TRANSCRIPTION REACTOME_RNA_POL_I_TRANSCRIPTION   |                                   |           |   |     |
|      | 50                                                                  | 0.76578796                        | 2.1791706 | 0 | 0   |

|                                                                              |                                   |                                   |                                  |      |            |
|------------------------------------------------------------------------------|-----------------------------------|-----------------------------------|----------------------------------|------|------------|
| 0                                                                            | 1003                              | "tags=48%, list=6%, signal=51%"   |                                  |      |            |
| REACTOME_PACKAGING_OF_TELOMERE_ENDS                                          |                                   |                                   |                                  |      |            |
| REACTOME_PACKAGING_OF_TELOMERE_ENDS                                          |                                   |                                   |                                  |      |            |
| 0.8334472                                                                    | 2.1748927                         | 0                                 | 0                                | 0    | 26         |
| 914                                                                          | "tags=65%, list=6%, signal=69%"   |                                   |                                  |      |            |
| REACTOME_MEIOSIS REACTOME_MEIOSIS                                            |                                   |                                   |                                  |      |            |
| 2.1692438                                                                    | 0                                 | 0                                 | 0                                | 2189 | 0.72017777 |
| list=14%, signal=62%"                                                        |                                   |                                   |                                  |      |            |
| REACTOME_ANTIGEN_PROCESSING_CROSS_PRESENTATION                               |                                   |                                   |                                  |      |            |
| REACTOME_ANTIGEN_PROCESSING_CROSS_PRESENTATION                               |                                   |                                   |                                  |      |            |
| 0.72450024                                                                   | 2.1686313                         | 0                                 | 0                                | 0    | 62         |
| 2668                                                                         | "tags=69%, list=17%, signal=83%"  |                                   |                                  |      |            |
| REACTOME_REGULATION_OF_ORNITHINE_DECARBOXYLASE_ODC                           |                                   |                                   |                                  |      |            |
| REACTOME_REGULATION_OF_ORNITHINE_DECARBOXYLASE_ODC                           |                                   |                                   |                                  |      |            |
| 0.7665451                                                                    | 2.1684968                         | 0                                 | 0                                | 0    | 45         |
| 2668                                                                         | "tags=78%, list=17%, signal=93%"  |                                   |                                  |      |            |
| REACTOME_VIF_MEDIATED_DEGRADATION_OF_APOBEC3G                                |                                   |                                   |                                  |      |            |
| REACTOME_VIF_MEDIATED_DEGRADATION_OF_APOBEC3G                                |                                   |                                   |                                  |      |            |
| 0.7728417                                                                    | 2.1652725                         | 0                                 | 0                                | 0    | 45         |
| 3270                                                                         | "tags=89%, list=20%, signal=111%" |                                   |                                  |      |            |
| REACTOME_REGULATION_OF_MRNA_STABILITY_BY_PROTEINS_THAT_BIND_AU_RICH_ELEMENTS |                                   |                                   |                                  |      |            |
| REACTOME_REGULATION_OF_MRNA_STABILITY_BY_PROTEINS_THAT_BIND_AU_RICH_ELEMENTS |                                   |                                   |                                  |      |            |
|                                                                              | 72                                | 0.7167441                         | 2.1609774                        | 0    |            |
| 0                                                                            | 0                                 | 3296                              | "tags=71%, list=20%, signal=89%" |      |            |
| REACTOME_ACTIVATION_OF_NF_KAPPAB_IN_B_CELLS                                  |                                   |                                   |                                  |      |            |
| REACTOME_ACTIVATION_OF_NF_KAPPAB_IN_B_CELLS                                  |                                   |                                   |                                  |      |            |
| 0.73404765                                                                   | 2.1494226                         | 0                                 | 0                                | 0    | 57         |
| 2668                                                                         | "tags=68%, list=17%, signal=82%"  |                                   |                                  |      |            |
| REACTOME_AUTODEGRADATION_OF_THE_E3_UBIQUITIN_LIGASE_COP1                     |                                   |                                   |                                  |      |            |
| REACTOME_AUTODEGRADATION_OF_THE_E3_UBIQUITIN_LIGASE_COP1                     |                                   |                                   |                                  |      |            |
| 43                                                                           | 0.7685827                         | 2.1427708                         | 0                                | 0    | 0          |
| 3071                                                                         | "tags=86%, list=19%, signal=106%" |                                   |                                  |      |            |
| REACTOME_ACTIVATION_OF_THE_PRE_REPLICATIVE_COMPLEX                           |                                   |                                   |                                  |      |            |
| REACTOME_ACTIVATION_OF_THE_PRE_REPLICATIVE_COMPLEX                           |                                   |                                   |                                  |      |            |
| 0.8516214                                                                    | 2.1190932                         | 0                                 | 0                                | 0    | 22         |
| 2349                                                                         | "tags=95%, list=15%, signal=112%" |                                   |                                  |      |            |
| REACTOME_EXTENSION_OF_TELOMERES REACTOME_EXTENSION_OF_TELOMERES              |                                   |                                   |                                  |      |            |
|                                                                              | 25                                | 0.8280412                         | 2.1181946                        | 0    | 0          |
| 0                                                                            | 2249                              | "tags=88%, list=14%, signal=102%" |                                  |      |            |
| REACTOME_METABOLISM_OF_RNA REACTOME_METABOLISM_OF_RNA                        |                                   |                                   |                                  |      |            |
|                                                                              | 209                               | 0.6318977                         | 2.0889328                        | 0    | 0          |
| 0                                                                            | 3131                              | "tags=54%, list=19%, signal=66%"  |                                  |      |            |
| REACTOME_METABOLISM_OF_MRNA REACTOME_METABOLISM_OF_MRNA                      |                                   |                                   |                                  |      |            |
|                                                                              | 168                               | 0.6350364                         | 2.0792878                        | 0    | 0          |
| 0                                                                            | 3545                              | "tags=58%, list=22%, signal=74%"  |                                  |      |            |
| REACTOME_E2F_MEDIATED_REGULATION_OF_DNA_REPLICATION                          |                                   |                                   |                                  |      |            |
| REACTOME_E2F_MEDIATED_REGULATION_OF_DNA_REPLICATION                          |                                   |                                   |                                  |      |            |
| 24                                                                           | 0.8109448                         | 2.0652668                         | 0                                | 0    | 0          |
| 2349                                                                         | "tags=83%, list=15%, signal=97%"  |                                   |                                  |      |            |
| REACTOME_DOWNSTREAM_SIGNALING_EVENTS_OF_B_CELL_RECEPTOR_BCR                  |                                   |                                   |                                  |      |            |
| REACTOME_DOWNSTREAM_SIGNALING_EVENTS_OF_B_CELL_RECEPTOR_BCR                  |                                   |                                   |                                  |      |            |
| 83                                                                           | 0.6694285                         | 2.0540242                         | 0                                | 0    | 0          |
| 2668                                                                         | "tags=57%, list=17%, signal=68%"  |                                   |                                  |      |            |

|                                                                                                                                      |                                                                                                                                      |                                    |          |          |       |
|--------------------------------------------------------------------------------------------------------------------------------------|--------------------------------------------------------------------------------------------------------------------------------------|------------------------------------|----------|----------|-------|
| REACTOME_TRANSCRIPTION                                                                                                               | REACTOME_TRANSCRIPTION                                                                                                               |                                    |          |          | 142   |
| 0.6363671                                                                                                                            | 2.0534878                                                                                                                            | 0                                  | 0        | 0        |       |
| 2541                                                                                                                                 | "tags=47%, list=16%, signal=56%"                                                                                                     |                                    |          |          |       |
| REACTOME_MEIOTIC_SYNAPSIS                                                                                                            | REACTOME_MEIOTIC_SYNAPSIS                                                                                                            |                                    |          |          | 46    |
| 0.7230101                                                                                                                            | 2.0430810                                                                                                                            | 0                                  | 0        |          |       |
| 1726                                                                                                                                 | "tags=52%, list=11%, signal=58%"                                                                                                     |                                    |          |          |       |
| REACTOME_LAGGING_STRAND_SYNTHESIS                                                                                                    | REACTOME_LAGGING_STRAND_SYNTHESIS                                                                                                    |                                    |          |          |       |
| 19                                                                                                                                   | 0.8339135                                                                                                                            | 2.0228088                          | 0        | 0        |       |
| 0                                                                                                                                    | 2690                                                                                                                                 | "tags=100%, list=17%, signal=120%" |          |          |       |
| REACTOME_RNA_POL_I_RNA_POL_III_AND_MITOCHONDRIAL_TRANSCRIPTION                                                                       | REACTOME_RNA_POL_I_RNA_POL_III_AND_MITOCHONDRIAL_TRANSCRIPTION                                                                       |                                    |          |          |       |
| 79                                                                                                                                   | 0.6645122                                                                                                                            | 2.0082498                          | 0        | 0        |       |
| 0                                                                                                                                    | 2153                                                                                                                                 | "tags=43%, list=13%, signal=49%"   |          |          |       |
| REACTOME_PROCESSING_OF_CAPPED_INTRON_CONTAINING_PRE_MRNA                                                                             | REACTOME_PROCESSING_OF_CAPPED_INTRON_CONTAINING_PRE_MRNA                                                                             |                                    |          |          |       |
| 101                                                                                                                                  | 0.63119835                                                                                                                           | 1.9826515                          | 0        | 1.65E-05 | 0.001 |
| 3083                                                                                                                                 | "tags=55%, list=19%, signal=68%"                                                                                                     |                                    |          |          |       |
| REACTOME_DNA_REPAIR                                                                                                                  | REACTOME_DNA_REPAIR                                                                                                                  |                                    |          |          | 90    |
| 0.629968                                                                                                                             | 1.9553496                                                                                                                            | 0                                  | 1.62E-05 | 0.001    |       |
| 2690                                                                                                                                 | "tags=49%, list=17%, signal=58%"                                                                                                     |                                    |          |          |       |
| REACTOME_SIGNALING_BY_THE_B_CELL_RECEPTOR_BCR                                                                                        | REACTOME_SIGNALING_BY_THE_B_CELL_RECEPTOR_BCR                                                                                        |                                    |          |          | 110   |
| 0.61634815                                                                                                                           | 1.9544188                                                                                                                            | 0                                  | 1.60E-05 | 0.001    |       |
| 3347                                                                                                                                 | "tags=58%, list=21%, signal=73%"                                                                                                     |                                    |          |          |       |
| REACTOME_APOPTOSIS                                                                                                                   | REACTOME_APOPTOSIS                                                                                                                   |                                    |          |          | 127   |
| 0.6065087                                                                                                                            | 1.9460149                                                                                                                            | 0                                  | 3.13E-05 | 0.002    |       |
| 3053                                                                                                                                 | "tags=59%, list=19%, signal=72%"                                                                                                     |                                    |          |          |       |
| REACTOME_MRNA_SPLICING                                                                                                               | REACTOME_MRNA_SPLICING                                                                                                               |                                    |          |          | 74    |
| 0.63119173                                                                                                                           | 1.9337256                                                                                                                            | 0                                  | 4.73E-05 | 0.003    |       |
| 3625                                                                                                                                 | "tags=64%, list=23%, signal=82%"                                                                                                     |                                    |          |          |       |
| REACTOME_TRANSLATION                                                                                                                 | REACTOME_TRANSLATION                                                                                                                 |                                    |          |          | 111   |
| 0.6085699                                                                                                                            | 1.9254034                                                                                                                            | 0                                  | 6.25E-05 | 0.004    |       |
| 4860                                                                                                                                 | "tags=73%, list=30%, signal=104%"                                                                                                    |                                    |          |          |       |
| REACTOME_MRNA_PROCESSING                                                                                                             | REACTOME_MRNA_PROCESSING                                                                                                             |                                    |          |          | 117   |
| 0.6059184                                                                                                                            | 1.9190344                                                                                                                            | 0                                  | 6.16E-05 | 0.004    |       |
| 4097                                                                                                                                 | "tags=63%, list=25%, signal=84%"                                                                                                     |                                    |          |          |       |
| REACTOME_MHC_CLASS_II_ANTIGEN_PRESENTATION                                                                                           | REACTOME_MHC_CLASS_II_ANTIGEN_PRESENTATION                                                                                           |                                    |          |          | 65    |
| 0.6381284                                                                                                                            | 1.9057755                                                                                                                            | 0                                  | 1.21E-04 | 0.008    |       |
| 2943                                                                                                                                 | "tags=52%, list=18%, signal=64%"                                                                                                     |                                    |          |          |       |
| REACTOME_PROCESSIVE_SYNTHESIS_ON_THE_LAGGING_STRAND                                                                                  | REACTOME_PROCESSIVE_SYNTHESIS_ON_THE_LAGGING_STRAND                                                                                  |                                    |          |          |       |
| 15                                                                                                                                   | 0.83370626                                                                                                                           | 1.9022654                          | 0        | 1.50E-04 | 0.01  |
| 2690                                                                                                                                 | "tags=100%, list=17%, signal=120%"                                                                                                   |                                    |          |          |       |
| REACTOME_INFLUENZA_LIFE_CYCLE                                                                                                        | REACTOME_INFLUENZA_LIFE_CYCLE                                                                                                        |                                    |          |          |       |
| 100                                                                                                                                  | 0.6054846                                                                                                                            | 1.8994455                          | 0        | 1.63E-04 |       |
| 0.011                                                                                                                                | 4452                                                                                                                                 | "tags=64%, list=28%, signal=88%"   |          |          |       |
| REACTOME_INHIBITION_OF_THE_PROTEOLYTIC_ACTIVITY_OF_APC_C_REQUIRED_FOR_THE_ONSET_OF_ANAPHASE_BY_MITOTIC_SPINDLE_CHECKPOINT_COMPONENTS | REACTOME_INHIBITION_OF_THE_PROTEOLYTIC_ACTIVITY_OF_APC_C_REQUIRED_FOR_THE_ONSET_OF_ANAPHASE_BY_MITOTIC_SPINDLE_CHECKPOINT_COMPONENTS |                                    |          |          |       |
| 18                                                                                                                                   | 0.77951956                                                                                                                           | 1.8872938                          | 0        | 2.05E-04 |       |
| 0.014                                                                                                                                | 2529                                                                                                                                 | "tags=67%, list=16%, signal=79%"   |          |          |       |
| REACTOME_MITOTIC_G2_G2_M_PHASES                                                                                                      | REACTOME_MITOTIC_G2_G2_M_PHASES                                                                                                      |                                    |          |          |       |

|            |           |                                                                            |             |          |          |
|------------|-----------|----------------------------------------------------------------------------|-------------|----------|----------|
| 0.016      | 62        | 0.63001895                                                                 | 1.8832685   | 0        | 2.31E-04 |
|            | 1802      | "tags=45%, list=11%, signal=51%"                                           |             |          |          |
|            |           | REACTOME_CLASS_I_MHC_MEDIATED_ANTIGEN_PROCESSING_PRESENTATION              |             |          |          |
|            |           | REACTOME_CLASS_I_MHC_MEDIATED_ANTIGEN_PROCESSING_PRESENTATION              |             |          |          |
| 0.022      | 209       | 0.5615058                                                                  | 1.8732063   | 0        | 3.12E-04 |
|            | 2668      | "tags=43%, list=17%, signal=51%"                                           |             |          |          |
|            |           | REACTOME_METABOLISM_OF_NON_CODING_RNA                                      |             |          |          |
|            |           | REACTOME_METABOLISM_OF_NON_CODING_RNA                                      |             |          |          |
| 0.66467977 |           | 1.8494879                                                                  | 0           | 5.31E-04 | 0.038    |
| 2566       |           | "tags=52%, list=16%, signal=62%"                                           |             |          |          |
|            |           | REACTOME_KINESINS                                                          |             |          | 17       |
| 0.7696647  |           | 1.8409367                                                                  | 0           | 6.20E-04 | 0.044    |
| 1004       |           | "tags=47%, list=6%, signal=50%"                                            |             |          |          |
|            |           | REACTOME_ANTIGEN_PROCESSING_UBIQUITINATION_PROTEASOME_DEGRADATION          |             |          |          |
|            |           | REACTOME_ANTIGEN_PROCESSING_UBIQUITINATION_PROTEASOME_DEGRADATION          |             |          |          |
| 0.046      | 180       | 0.56208265                                                                 | 1.8390976   | 0        | 6.39E-04 |
|            | 3417      | "tags=49%, list=21%, signal=62%"                                           |             |          |          |
|            |           | REACTOME_SRP_DEPENDENT_COTRANSLATIONAL_PROTEIN_TARGETING_TO_MEMBRANE       |             |          |          |
|            |           | REACTOME_SRP_DEPENDENT_COTRANSLATIONAL_PROTEIN_TARGETING_TO_MEMBRANE       |             |          |          |
| 6.31E-04   | 80        | 0.6074608                                                                  | 1.8380127   | 0        |          |
| 0.046      | 5170      | "tags=76%, list=32%, signal=112%"                                          |             |          |          |
|            |           | REACTOME_FORMATION_OF_THE_TERNARY_COMPLEX_AND_SUBSEQUENTLY_THE_43S_COMPLEX |             |          |          |
|            |           | REACTOME_FORMATION_OF_THE_TERNARY_COMPLEX_AND_SUBSEQUENTLY_THE_43S_COMPLEX |             |          |          |
| 6.23E-04   | 34        | 0.6693575                                                                  | 1.8376149   | 0        |          |
| 0.046      | 5011      | "tags=85%, list=31%, signal=124%"                                          |             |          |          |
|            |           | REACTOME_INTERACTIONS_OF_VPR_WITH_HOST_CELLULAR_PROTEINS                   |             |          |          |
|            |           | REACTOME_INTERACTIONS_OF_VPR_WITH_HOST_CELLULAR_PROTEINS                   |             |          |          |
| 29         | 0.7054716 | 1.8346659                                                                  | 0           | 6.93E-04 | 0.051    |
| 2566       |           | "tags=52%, list=16%, signal=61%"                                           |             |          |          |
|            |           | REACTOME_THE_ROLE_OF_NEF_IN_HIV1_REPLICATION_AND_DISEASE_PATHOGENESIS      |             |          |          |
|            |           | REACTOME_THE_ROLE_OF_NEF_IN_HIV1_REPLICATION_AND_DISEASE_PATHOGENESIS      |             |          |          |
| 7.62E-04   | 22        | 0.72063744                                                                 | 1.8282096   | 0        |          |
| 0.057      | 2388      | "tags=59%, list=15%, signal=69%"                                           |             |          |          |
|            |           | REACTOME_SIGNAL_TRANSDUCTION_BY_L1                                         |             |          |          |
|            |           | REACTOME_SIGNAL_TRANSDUCTION_BY_L1                                         |             |          |          |
| 0.6843626  |           | 1.8276379                                                                  | 0.001257862 | 7.53E-04 | 0.057    |
| 3168       |           | "tags=56%, list=20%, signal=70%"                                           |             |          |          |
|            |           | REACTOME_3_UTR_MEDIATED_TRANSLATIONAL_REGULATION                           |             |          |          |
|            |           | REACTOME_3_UTR_MEDIATED_TRANSLATIONAL_REGULATION                           |             |          |          |
| 0.5974011  |           | 1.8265032                                                                  | 0           | 7.69E-04 | 0.059    |
| 5170       |           | "tags=77%, list=32%, signal=112%"                                          |             |          |          |
|            |           | REACTOME_SYNTHESIS_AND_INTERCONVERSION_OF_NUCLEOTIDE_DI_AND_TRIPHOSPHATES  |             |          |          |
|            |           | REACTOME_SYNTHESIS_AND_INTERCONVERSION_OF_NUCLEOTIDE_DI_AND_TRIPHOSPHATES  |             |          |          |
| 0.06       | 15        | 0.77967                                                                    | 1.8250481   | 0        | 7.73E-04 |
|            | 1305      | "tags=53%, list=8%, signal=58%"                                            |             |          |          |
|            |           | REACTOME_SMOOTH_MUSCLE_CONTRACTION                                         |             |          |          |
|            |           | REACTOME_SMOOTH_MUSCLE_CONTRACTION                                         |             |          |          |
| 0.73312557 |           | 1.8187292                                                                  | 0           | 9.10E-04 | 0.072    |
| 2757       |           | "tags=57%, list=17%, signal=69%"                                           |             |          |          |
|            |           | REACTOME_PHOSPHORYLATION_OF_THE_APC_COMPLEX                                |             |          |          |

|                                                                                                                |                                   |                                  |                                  |                                  |           |
|----------------------------------------------------------------------------------------------------------------|-----------------------------------|----------------------------------|----------------------------------|----------------------------------|-----------|
| REACTOME_PHOSPHORYLATION_OF_THE_APC_C                                                                          |                                   |                                  |                                  | 16                               |           |
| 0.77748173                                                                                                     | 1.8156877                         | 0                                | 9.60E-04                         | 0.076                            |           |
| 2529                                                                                                           | "tags=63%, list=16%, signal=74%"  |                                  |                                  |                                  |           |
| REACTOME_TRANSPORT_OF_RIBONUCLEOPROTEINS_INTO_THE_HOST_NUCLEUS                                                 |                                   |                                  |                                  |                                  |           |
| REACTOME_TRANSPORT_OF_RIBONUCLEOPROTEINS_INTO_THE_HOST_NUCLEUS                                                 |                                   |                                  |                                  |                                  |           |
|                                                                                                                | 25                                | 0.71044284                       | 1.8108827                        | 0                                | 9.97E-04  |
| 0.08                                                                                                           | 2566                              | "tags=52%, list=16%, signal=62%" |                                  |                                  |           |
| REACTOME_DOUBLE_STRAND_BREAK_REPAIR                                                                            |                                   |                                  |                                  |                                  |           |
| REACTOME_DOUBLE_STRAND_BREAK_REPAIR                                                                            |                                   |                                  |                                  | 20                               |           |
| 0.7331169                                                                                                      | 1.8094913                         | 0.002624672                      | 9.98E-04                         | 0.081                            |           |
| 3217                                                                                                           | "tags=75%, list=20%, signal=94%"  |                                  |                                  |                                  |           |
| REACTOME_APC_CDC20_MEDIATED_DEGRADATION_OF_NEK2A                                                               |                                   |                                  |                                  |                                  |           |
| REACTOME_APC_CDC20_MEDIATED_DEGRADATION_OF_NEK2A                                                               |                                   |                                  |                                  | 20                               |           |
| 0.7370271                                                                                                      | 1.8091898                         | 0                                | 9.87E-04                         | 0.081                            |           |
| 2529                                                                                                           | "tags=60%, list=16%, signal=71%"  |                                  |                                  |                                  |           |
| REACTOME_HIV_LIFE_CYCLE                                                                                        | REACTOME_HIV_LIFE_CYCLE           |                                  |                                  |                                  | 98        |
| 0.5751513                                                                                                      | 1.8084722                         | 0                                | 9.76E-04                         | 0.081                            |           |
| 2884                                                                                                           | "tags=49%, list=18%, signal=59%"  |                                  |                                  |                                  |           |
| REACTOME_G0_AND_EARLY_G1                                                                                       | REACTOME_G0_AND_EARLY_G1          |                                  |                                  |                                  | 20        |
| 0.7407984                                                                                                      | 1.8070996                         | 0                                | 9.66E-04                         | 0.081                            |           |
| 1960                                                                                                           | "tags=60%, list=12%, signal=68%"  |                                  |                                  |                                  |           |
| REACTOME_ADAPTIVE_IMMUNE_SYSTEM                                                                                | REACTOME_ADAPTIVE_IMMUNE_SYSTEM   |                                  |                                  |                                  |           |
|                                                                                                                | 428                               | 0.5322155                        | 1.80087                          | 0                                | 0.0010237 |
| 0.087                                                                                                          | 3349                              | "tags=46%, list=21%, signal=56%" |                                  |                                  |           |
| REACTOME_INFLUENZA_VIRAL_RNA_TRANSCRIPTION_AND_REPLICATION                                                     |                                   |                                  |                                  |                                  |           |
| REACTOME_INFLUENZA_VIRAL_RNA_TRANSCRIPTION_AND_REPLICATION                                                     |                                   |                                  |                                  |                                  |           |
| 70                                                                                                             | 0.59453005                        | 1.797866                         | 0                                | 0.001068719                      | 0.092     |
| 5170                                                                                                           | "tags=74%, list=32%, signal=109%" |                                  |                                  |                                  |           |
| REACTOME_TRANSPORT_OF_MATURE_MRNA_DERIVED_FROM_AN_INTRONLESS_TRANSCRIPT                                        |                                   |                                  |                                  |                                  |           |
| REACTOME_TRANSPORT_OF_MATURE_MRNA_DERIVED_FROM_AN_INTRONLESS_TRANSCRIPT                                        |                                   |                                  |                                  |                                  |           |
|                                                                                                                | 30                                | 0.6769309                        | 1.7917185                        |                                  |           |
| 0.001243781                                                                                                    | 0.001190095                       | 0.102                            | 2566                             | "tags=50%, list=16%, signal=59%" |           |
| REACTOME_NUCLEOTIDE_EXCISION_REPAIR                                                                            |                                   |                                  |                                  |                                  |           |
| REACTOME_NUCLEOTIDE_EXCISION_REPAIR                                                                            |                                   |                                  |                                  | 43                               |           |
| 0.6357211                                                                                                      | 1.7853262                         | 0                                | 0.001320466                      | 0.115                            |           |
| 2087                                                                                                           | "tags=49%, list=13%, signal=56%"  |                                  |                                  |                                  |           |
| REACTOME_ACTIVATION_OF_THE_MRNA_UPON_BINDING_OF_THE_CAP_BINDING_COMPLEX_AND_EIFS_AND_SUBSEQUENT_BINDING_TO_43S |                                   |                                  |                                  |                                  |           |
| REACTOME_ACTIVATION_OF_THE_MRNA_UPON_BINDING_OF_THE_CAP_BINDING_COMPLEX_AND_EIFS_AND_SUBSEQUENT_BINDING_TO_43S |                                   |                                  |                                  | 42                               |           |
| 0.6423143                                                                                                      | 1.7824532                         | 0                                | 0.001394577                      | 0.122                            |           |
| 4050                                                                                                           | "tags=71%, list=25%, signal=95%"  |                                  |                                  |                                  |           |
| REACTOME_L1CAM_INTERACTIONS                                                                                    | REACTOME_L1CAM_INTERACTIONS       |                                  |                                  |                                  |           |
|                                                                                                                | 66                                | 0.59871936                       | 1.7823344                        | 0                                |           |
| 0.001390955                                                                                                    | 0.122                             | 3210                             | "tags=41%, list=20%, signal=51%" |                                  |           |
| REACTOME_RECYCLING_PATHWAY_OF_L1                                                                               | REACTOME_RECYCLING_PATHWAY_OF_L1  |                                  |                                  |                                  |           |
|                                                                                                                | 20                                | 0.7276558                        | 1.7787886                        | 0                                |           |
| 0.001516169                                                                                                    | 0.135                             | 3046                             | "tags=65%, list=19%, signal=80%" |                                  |           |
| REACTOME_APC_C_CDC20_MEDIATED_DEGRADATION_OF_CYCLIN_B                                                          |                                   |                                  |                                  |                                  |           |
| REACTOME_APC_C_CDC20_MEDIATED_DEGRADATION_OF_CYCLIN_B                                                          |                                   |                                  |                                  |                                  |           |
| 17                                                                                                             | 0.746631                          | 1.7735586                        | 0                                | 0.001722047                      | 0.152     |
| 2529                                                                                                           | "tags=59%, list=16%, signal=70%"  |                                  |                                  |                                  |           |

|                                                                                |                                   |                                  |                                   |                                  |  |
|--------------------------------------------------------------------------------|-----------------------------------|----------------------------------|-----------------------------------|----------------------------------|--|
| REACTOME_GLOBAL_GENOMIC_NER_GG_NER                                             |                                   |                                  |                                   |                                  |  |
| REACTOME_GLOBAL_GENOMIC_NER_GG_NER                                             |                                   |                                  |                                   | 31                               |  |
| 0.6602998                                                                      | 1.7729254                         | 0                                | 0.001715832                       | 0.152                            |  |
| 2087                                                                           | "tags=52%, list=13%, signal=59%"  |                                  |                                   |                                  |  |
| REACTOME_CYTOSOLIC_TRNA_AMINOACYLATION                                         |                                   |                                  |                                   |                                  |  |
| REACTOME_CYTOSOLIC_TRNA_AMINOACYLATION                                         |                                   |                                  |                                   | 22                               |  |
| 0.6983128                                                                      | 1.7600849                         | 0.002621232                      | 0.002215929                       |                                  |  |
| 0.194                                                                          | 2930                              | "tags=64%, list=18%, signal=78%" |                                   |                                  |  |
| REACTOME_TRANSPORT_OF_MATURE_TRANSCRIPT_TO_CYTOPLASM                           |                                   |                                  |                                   |                                  |  |
| REACTOME_TRANSPORT_OF_MATURE_TRANSCRIPT_TO_CYTOPLASM                           |                                   |                                  |                                   |                                  |  |
| 39                                                                             | 0.64466804                        | 1.7580438                        | 0.001212121                       |                                  |  |
| 0.002245039                                                                    | 0.199                             | 2566                             | "tags=49%, list=16%, signal=58%"  |                                  |  |
| REACTOME_NEP_NS2_INTERACTS_WITH_THE_CELLULAR_EXPORT_MACHINERY                  |                                   |                                  |                                   |                                  |  |
| REACTOME_NEP_NS2_INTERACTS_WITH_THE_CELLULAR_EXPORT_MACHINERY                  |                                   |                                  |                                   |                                  |  |
| 25                                                                             | 0.67900044                        | 1.7579929                        | 0.003816794                       |                                  |  |
| 0.002223453                                                                    | 0.199                             | 2647                             | "tags=52%, list=16%, signal=62%"  |                                  |  |
| REACTOME_LATE_PHASE_OF_HIV_LIFE_CYCLE                                          |                                   |                                  |                                   |                                  |  |
| REACTOME_LATE_PHASE_OF_HIV_LIFE_CYCLE                                          |                                   |                                  |                                   | 85                               |  |
| 0.5708293                                                                      | 1.7497482                         | 0                                | 0.002552712                       | 0.224                            |  |
| 4097                                                                           | "tags=61%, list=25%, signal=82%"  |                                  |                                   |                                  |  |
| REACTOME_RNA_POL_II_TRANSCRIPTION                                              | REACTOME_RNA_POL_II_TRANSCRIPTION |                                  |                                   |                                  |  |
| 75                                                                             | 0.5697471                         | 1.7480543                        | 0                                 |                                  |  |
| 0.002608493                                                                    | 0.229                             | 4834                             | "tags=68%, list=30%, signal=97%"  |                                  |  |
| REACTOME_REGULATION_OF_GLucokinase_BY_GLucokinase_REGULATORY_PROTEIN           |                                   |                                  |                                   |                                  |  |
| REACTOME_REGULATION_OF_GLucokinase_BY_GLucokinase_REGULATORY_PROTEIN           |                                   |                                  |                                   |                                  |  |
|                                                                                | 25                                | 0.6814263                        | 1.7390118                         |                                  |  |
| 0.001290323                                                                    | 0.002958851                       | 0.254                            | 2566                              | "tags=48%, list=16%, signal=57%" |  |
| REACTOME_SEMAPHORIN_INTERACTIONS                                               | REACTOME_SEMAPHORIN_INTERACTIONS  |                                  |                                   |                                  |  |
| 54                                                                             | 0.6040439                         | 1.7382782                        | 0                                 |                                  |  |
| 0.002950968                                                                    | 0.256                             | 3168                             | "tags=48%, list=20%, signal=60%"  |                                  |  |
| REACTOME_DEADENYLATION_DEPENDENT_MRNA_DECAY                                    |                                   |                                  |                                   |                                  |  |
| REACTOME_DEADENYLATION_DEPENDENT_MRNA_DECAY                                    |                                   |                                  |                                   | 39                               |  |
| 0.6275189                                                                      | 1.7357222                         | 0                                | 0.003048554                       | 0.265                            |  |
| 3951                                                                           | "tags=56%, list=25%, signal=75%"  |                                  |                                   |                                  |  |
| REACTOME_ELONGATION_ARREST_AND_RECOVERY                                        |                                   |                                  |                                   |                                  |  |
| REACTOME_ELONGATION_ARREST_AND_RECOVERY                                        |                                   |                                  |                                   | 24                               |  |
| 0.67978466                                                                     | 1.7307440                         | 0.003337209                      | 0.29                              |                                  |  |
| 3093                                                                           | "tags=67%, list=19%, signal=82%"  |                                  |                                   |                                  |  |
| REACTOME_TRANSCRIPTION_COUPLED_NER_TC_NER                                      |                                   |                                  |                                   |                                  |  |
| REACTOME_TRANSCRIPTION_COUPLED_NER_TC_NER                                      |                                   |                                  |                                   | 38                               |  |
| 0.6377384                                                                      | 1.7296275                         | 0                                | 0.003344868                       | 0.294                            |  |
| 2087                                                                           | "tags=50%, list=13%, signal=57%"  |                                  |                                   |                                  |  |
| REACTOME_PEPTIDE_CHAIN_ELONGATION                                              | REACTOME_PEPTIDE_CHAIN_ELONGATION |                                  |                                   |                                  |  |
| 58                                                                             | 0.59065306                        | 1.7290201                        | 0                                 |                                  |  |
| 0.003315003                                                                    | 0.294                             | 5170                             | "tags=72%, list=32%, signal=106%" |                                  |  |
| REACTOME_NONSENSE_MEDIATED_DECAY_ENHANCED_BY_THE_EXON_JUNCTION_COMPLEX         |                                   |                                  |                                   |                                  |  |
| REACTOME_NONSENSE_MEDIATED_DECAY_ENHANCED_BY_THE_EXON_JUNCTION_COMPLEX         |                                   |                                  |                                   |                                  |  |
| 74                                                                             | 0.5738943                         | 1.7268243                        | 0                                 |                                  |  |
| 0.003425381                                                                    | 0.304                             | 5170                             | "tags=70%, list=32%, signal=103%" |                                  |  |
| REACTOME_FACTORS_INVOLVED_IN_MEGAKARYOCYTE_DEVELOPMENT_AND_PLATELET_PRODUCTION |                                   |                                  |                                   |                                  |  |



REACTOME\_FACTORS\_INVOLVED\_IN\_MEGAKARYOCYTE\_DEVELOPMENT\_AND\_PLATELET\_PRODUC-  
 TION 92 0.5572926 1.7246474  
 0 0.003515385 0.313 1935 "tags=30%, list=12%,  
 signal=34%"  
 REACTOME\_PYRUVATE\_METABOLISM\_AND\_CITRIC\_ACID\_TCA\_CYCLE  
 REACTOME\_PYRUVATE\_METABOLISM\_AND\_CITRIC\_ACID\_TCA\_CYCLE  
 33 0.64319754 1.7216444 0.002484472  
 0.00365842 0.328 3143 "tags=67%, list=20%, signal=83%"  
 REACTOME\_SIGNALLING\_BY\_NGF REACTOME\_SIGNALLING\_BY\_NGF  
 177 0.5259908 1.7189999 0  
 0.003772554 0.339 3286 "tags=41%, list=20%, signal=51%"  
 REACTOME\_GLUCOSE\_TRANSPORT REACTOME\_GLUCOSE\_TRANSPORT  
 35 0.63752085 1.7161608 0  
 0.004000464 0.363 2566 "tags=40%, list=16%, signal=47%"  
 REACTOME\_CITRIC\_ACID\_CYCLE\_TCA\_CYCLE  
 REACTOME\_CITRIC\_ACID\_CYCLE\_TCA\_CYCLE 17  
 0.7196686 1.7127221 0 0.004280001 0.387  
 3820 "tags=94%, list=24%, signal=123%"  
 REACTOME\_NEF\_MEDIATES\_DOWN\_MODULATION\_OF\_CELL\_SURFACE\_RECEPTORS\_BY\_R  
 ECRUITING\_THEM\_TO\_CLATHRIN\_ADAPTERS  
 REACTOME\_NEF\_MEDIATES\_DOWN\_MODULATION\_OF\_CELL\_SURFACE\_RECEPTORS\_BY\_R  
 ECRUITING\_THEM\_TO\_CLATHRIN\_ADAPTERS 17 0.726079  
 1.7105254 0 0.004367189 0.396  
 2915 "tags=65%, list=18%, signal=79%"  
 REACTOME\_NGF\_SIGNALLING\_VIA\_TRKA\_FROM\_THE\_PLASMA\_MEMBRANE  
 REACTOME\_NGF\_SIGNALLING\_VIA\_TRKA\_FROM\_THE\_PLASMA\_MEMBRANE  
 114 0.5340791 1.7057137 0 0.004741552  
 0.426 3051 "tags=40%, list=19%, signal=49%"  
 REACTOME\_RNA\_POL\_II\_PRE\_TRANSCRIPTION\_EVENTS  
 REACTOME\_RNA\_POL\_II\_PRE\_TRANSCRIPTION\_EVENTS 46  
 0.59376645 1.7052727 0.00120773 0.004755336  
 0.43 4754 "tags=72%, list=30%, signal=101%"  
 REACTOME\_CONVERSION\_FROM\_APC\_C\_CDC20\_TO\_APC\_C\_CDH1\_IN\_LATE\_ANAPHASE  
 REACTOME\_CONVERSION\_FROM\_APC\_C\_CDC20\_TO\_APC\_C\_CDH1\_IN\_LATE\_ANAPHASE  
 16 0.72515655 1.7014331 0.004149378  
 0.005148049 0.461 2529 "tags=56%, list=16%, signal=67%"  
 REACTOME\_FORMATION\_OF\_RNA\_POL\_II\_ELONGATION\_COMPLEX\_  
 REACTOME\_FORMATION\_OF\_RNA\_POL\_II\_ELONGATION\_COMPLEX\_  
 33 0.63125914 1.6975124 0 0.005481726  
 0.482 4651 "tags=76%, list=29%, signal=106%"  
 REACTOME\_SEMA4D\_IN\_SEMAPHORIN\_SIGNALING  
 REACTOME\_SEMA4D\_IN\_SEMAPHORIN\_SIGNALING 21  
 0.6668347 1.6743152 0.003963012 0.007788757  
 0.622 2060 "tags=57%, list=13%, signal=65%"  
 REACTOME\_TRAFFICKING\_OF\_AMPA\_RECEPTORS  
 REACTOME\_TRAFFICKING\_OF\_AMPA\_RECEPTORS 23  
 0.66755944 1.671353 0.002670227 0.008139056 0.635  
 2388 "tags=39%, list=15%, signal=46%"  
 REACTOME\_METABOLISM\_OF\_NUCLEOTIDES  
 REACTOME\_METABOLISM\_OF\_NUCLEOTIDES 62  
 0.56756264 1.670183 0 0.008191384 0.642  
 1341 "tags=31%, list=8%, signal=33%"  
 REACTOME\_SEMA4D\_INDUCED\_CELL\_MIGRATION\_AND\_GROWTH\_CONE\_COLLAPSE  
 REACTOME\_SEMA4D\_INDUCED\_CELL\_MIGRATION\_AND\_GROWTH\_CONE\_COLLAPSE

|                                                                   |             |                                 |                                   |
|-------------------------------------------------------------------|-------------|---------------------------------|-----------------------------------|
| 18                                                                | 0.6948419   | 1.6645529                       | 0.00538358                        |
| 0.008839243                                                       | 0.68        | 2060                            | "tags=61%, list=13%, signal=70%"  |
| REACTOME_METABOLISM_OF_PROTEINS                                   |             | REACTOME_METABOLISM_OF_PROTEINS |                                   |
| 335                                                               | 0.4903597   | 1.6538304                       | 0                                 |
| 0.010253902                                                       | 0.734       | 4064                            | "tags=48%, list=25%, signal=63%"  |
| REACTOME_MRNA_SPLICING_MINOR_PATHWAY                              |             |                                 |                                   |
| REACTOME_MRNA_SPLICING_MINOR_PATHWAY                              |             |                                 | 28                                |
| 0.62721676                                                        | 1.6496663   | 0.003841229                     | 0.010663147                       |
| 0.756                                                             | 4834        |                                 | "tags=82%, list=30%, signal=117%" |
| REACTOME_SIGNALING_BY_EGFR_IN_CANCER                              |             |                                 |                                   |
| REACTOME_SIGNALING_BY_EGFR_IN_CANCER                              |             |                                 | 93                                |
| 0.5283671                                                         | 1.6400547   | 0                               | 0.012001592                       |
| 2829                                                              |             |                                 | 0.795                             |
|                                                                   |             |                                 | "tags=45%, list=18%, signal=54%"  |
| REACTOME_RECRUITMENT_OF_MITOTIC_CENTROSOME_PROTEINS_AND_COMPLEXES |             |                                 |                                   |
| REACTOME_RECRUITMENT_OF_MITOTIC_CENTROSOME_PROTEINS_AND_COMPLEXES |             |                                 |                                   |
| 48                                                                | 0.5665597   | 1.6382773                       | 0                                 |
| 0.012255388                                                       | 0.805       | 2395                            | "tags=46%, list=15%, signal=54%"  |
| REACTOME_GLUONEOGENESIS                                           |             | REACTOME_GLUONEOGENESIS         | 27                                |
| 0.62301564                                                        | 1.6316622   | 0.007731959                     | 0.013247914                       |
| 0.83                                                              | 1979        |                                 | "tags=44%, list=12%, signal=51%"  |
| REACTOME_G1_PHASE                                                 |             | REACTOME_G1_PHASE               | 29                                |
| 0.61381996                                                        | 1.6301979   | 0.005134788                     | 0.013423311                       |
| 0.832                                                             | 2269        |                                 | "tags=55%, list=14%, signal=64%"  |
| REACTOME_RESPONSE_TO_ELEVATED_PLATELET_CYTOSOLIC_CA2              |             |                                 |                                   |
| REACTOME_RESPONSE_TO_ELEVATED_PLATELET_CYTOSOLIC_CA2              |             |                                 |                                   |
| 68                                                                | 0.5463355   | 1.6299331                       | 0.001140251                       |
| 0.013338902                                                       | 0.832       | 2772                            | "tags=35%, list=17%, signal=42%"  |
| REACTOME_COSTIMULATION_BY_THE_CD28_FAMILY                         |             |                                 |                                   |
| REACTOME_COSTIMULATION_BY_THE_CD28_FAMILY                         |             |                                 | 47                                |
| 1.629841                                                          | 0.003631961 | 0.013263412                     | 0.833                             |
| 2738                                                              |             |                                 | "tags=49%, list=17%, signal=59%"  |
| REACTOME_ANTIVIRAL_MECHANISM_BY_IFN_STIMULATED_GENES              |             |                                 |                                   |
| REACTOME_ANTIVIRAL_MECHANISM_BY_IFN_STIMULATED_GENES              |             |                                 |                                   |
| 56                                                                | 0.559681    | 1.629356                        | 0.002301496                       |
| 2661                                                              |             |                                 | 0.013258281                       |
|                                                                   |             |                                 | 0.833                             |
|                                                                   |             |                                 | "tags=48%, list=17%, signal=58%"  |
| REACTOME_GLUCOSE_METABOLISM                                       |             | REACTOME_GLUCOSE_METABOLISM     |                                   |
| 57                                                                | 0.55505055  | 1.6275308                       | 0.00238379                        |
| 0.013414376                                                       | 0.835       | 2948                            | "tags=47%, list=18%, signal=58%"  |
| REACTOME_ACTIVATION_OF_CHAPERONE_GENES_BY_XBP1S                   |             |                                 |                                   |
| REACTOME_ACTIVATION_OF_CHAPERONE_GENES_BY_XBP1S                   |             |                                 | 37                                |
| 0.59127975                                                        | 1.6179823   | 0.002528445                     | 0.015110023                       |
| 0.864                                                             | 4175        |                                 | "tags=62%, list=26%, signal=84%"  |
| REACTOME_FORMATION_OF_THE_HIV1_EARLY_ELONGATION_COMPLEX           |             |                                 |                                   |
| REACTOME_FORMATION_OF_THE_HIV1_EARLY_ELONGATION_COMPLEX           |             |                                 |                                   |
| 25                                                                | 0.6322273   | 1.6164488                       | 0.010309278                       |
| 0.015214064                                                       | 0.87        | 4651                            | "tags=76%, list=29%, signal=107%" |
| REACTOME_INTERFERON_SIGNALING                                     |             | REACTOME_INTERFERON_SIGNALING   |                                   |
| 117                                                               | 0.5084619   | 1.6137779                       | 0                                 |
| 0.01568209                                                        | 0.886       | 3379                            | "tags=47%, list=21%, signal=59%"  |
| REACTOME_MITOCHONDRIAL_PROTEIN_IMPORT                             |             |                                 |                                   |
| REACTOME_MITOCHONDRIAL_PROTEIN_IMPORT                             |             |                                 | 43                                |
| 1.6049218                                                         | 0.001182033 | 0.01740689                      | 0.572403                          |
| 3298                                                              |             |                                 | 0.914                             |
|                                                                   |             |                                 | "tags=56%, list=20%, signal=70%"  |
| REACTOME_AXON_GUIDANCE                                            |             | REACTOME_AXON_GUIDANCE          | 197                               |

0.48736268      1.6045227      0      0.017365336      0.919  
3210      "tags=32%, list=20%, signal=40%"  
REACTOME\_ABORTIVE\_ELONGATION\_OF\_HIV1\_TRANSCRIPT\_IN\_THE\_ABSENCE\_OF\_TA  
T  
REACTOME\_ABORTIVE\_ELONGATION\_OF\_HIV1\_TRANSCRIPT\_IN\_THE\_ABSENCE\_OF\_TA  
T      17      0.6862599      1.60001      0.009320905  
0.018202595      0.929      4366      "tags=82%, list=27%, signal=113%"  
REACTOME\_ASPARAGINE\_N\_LINKED\_GLYCOSYLATION  
REACTOME\_ASPARAGINE\_N\_LINKED\_GLYCOSYLATION      70  
0.5320143      1.5989769      0.002290951      0.018324966  
0.93      4187      "tags=56%, list=26%, signal=75%"  
REACTOME\_UNFOLDED\_PROTEIN\_RESPONSE  
REACTOME\_UNFOLDED\_PROTEIN\_RESPONSE      63  
0.5472108      1.5965610      0.018824704      0.936  
3533      "tags=49%, list=22%, signal=63%"  
REACTOME\_PYRIMIDINE\_METABOLISM      REACTOME\_PYRIMIDINE\_METABOLISM  
21      0.63343203      1.5837096      0.013245033  
0.021954898      0.962      948      "tags=29%, list=6%, signal=30%"  
REACTOME\_DARPP\_32\_EVENTS      REACTOME\_DARPP\_32\_EVENTS      23  
0.621281      1.5816603      0.009174312      0.022206824      0.962  
3286      "tags=70%, list=20%, signal=87%"  
REACTOME\_HEMOSTASIS      REACTOME\_HEMOSTASIS      383  
0.46375072      1.5812035      0      0.022205468      0.963  
3806      "tags=38%, list=24%, signal=48%"  
REACTOME\_TGF\_BETA\_RECEPTOR\_SIGNALING\_ACTIVATES\_SMADS  
REACTOME\_TGF\_BETA\_RECEPTOR\_SIGNALING\_ACTIVATES\_SMADS  
19      0.6596114      1.5732145      0.006648936  
0.024259897      0.974      3725      "tags=63%, list=23%, signal=82%"  
REACTOME\_CELL\_DEATH\_SIGNALLING\_VIA\_NRAGE\_NRIF\_AND\_NADE  
REACTOME\_CELL\_DEATH\_SIGNALLING\_VIA\_NRAGE\_NRIF\_AND\_NADE  
46      0.5498246      1.5692052      0.004716981  
0.025370775      0.977      2764      "tags=37%, list=17%, signal=44%"  
REACTOME\_MRNA\_CAPPING      REACTOME\_MRNA\_CAPPING      22  
0.6229884      1.5673361      0.01615074      0.025755115  
0.977      4651      "tags=73%, list=29%, signal=102%"  
REACTOME\_ERK\_MAPK\_TARGETS      REACTOME\_ERK\_MAPK\_TARGETS      18  
0.6541157      1.56320702      0.026880778      0.983  
3051      "tags=61%, list=19%, signal=75%"  
REACTOME\_MUSCLE\_CONTRACTION      REACTOME\_MUSCLE\_CONTRACTION  
40      0.56232274      1.5617294      0.007185629  
0.027248725      0.983      3435      "tags=43%, list=21%, signal=54%"  
REACTOME\_P75\_NTR\_RECEPTOR\_MEDIATED\_SIGNALLING  
REACTOME\_P75\_NTR\_RECEPTOR\_MEDIATED\_SIGNALLING      65  
0.5221838      1.5613767      0      0.02718797      0.984  
3270      "tags=40%, list=20%, signal=50%"  
REACTOME\_LOSS\_OF\_NLP\_FROM\_MITOTIC\_CENTROSOMES  
REACTOME\_LOSS\_OF\_NLP\_FROM\_MITOTIC\_CENTROSOMES      43  
0.5452198      1.5569755      0.012135922      0.028316831  
0.986      2069      "tags=44%, list=13%, signal=51%"  
REACTOME\_NUCLEAR\_EVENTS\_KINASE\_AND\_TRANSCRIPTION\_FACTOR\_ACTIVATION  
REACTOME\_NUCLEAR\_EVENTS\_KINASE\_AND\_TRANSCRIPTION\_FACTOR\_ACTIVATION  
21      0.6214711      1.5562999      0.022280471  
0.028317956      0.986      3051      "tags=57%, list=19%, signal=70%"  
REACTOME\_PRE\_NOTCH\_PROCESSING\_IN\_GOLGI

|                                                                                                                             |                                  |                                  |                                  |             |
|-----------------------------------------------------------------------------------------------------------------------------|----------------------------------|----------------------------------|----------------------------------|-------------|
| REACTOME_PRE_NOTCH_PROCESSING_IN_GOLGI                                                                                      |                                  |                                  |                                  | 15          |
| 0.67220306                                                                                                                  | 1.5553675                        | 0.023709903                      |                                  | 0.028438674 |
| 0.986                                                                                                                       | 2121                             | "tags=53%, list=13%, signal=61%" |                                  |             |
| REACTOME_BIOSYNTHESIS_OF_THE_N_GLYCAN_PRECURSOR_DOLICHOL_LIPID_LINKED_OLIGOSACCHARIDE_LLO_AND_TRANSFER_TO_A_NASCENT_PROTEIN |                                  |                                  |                                  |             |
| REACTOME_BIOSYNTHESIS_OF_THE_N_GLYCAN_PRECURSOR_DOLICHOL_LIPID_LINKED_OLIGOSACCHARIDE_LLO_AND_TRANSFER_TO_A_NASCENT_PROTEIN |                                  |                                  |                                  |             |
| 26                                                                                                                          | 0.59594065                       | 1.5455664                        |                                  | 0.014138818 |
| 0.03163929                                                                                                                  | 0.989                            | 2832                             | "tags=42%, list=18%, signal=51%" |             |
| REACTOME_GLYCOLYSIS                                                                                                         |                                  | REACTOME_GLYCOLYSIS              |                                  | 26          |
| 0.60091716                                                                                                                  | 1.5445992                        | 0.015645372                      |                                  | 0.03180582  |
| 0.99                                                                                                                        | 1979                             | "tags=50%, list=12%, signal=57%" |                                  |             |
| REACTOME_INTEGRIN_ALPHA_IIB_BETA3_SIGNALING                                                                                 |                                  |                                  |                                  |             |
| REACTOME_INTEGRIN_ALPHA_IIB_BETA3_SIGNALING                                                                                 |                                  |                                  |                                  | 26          |
| 0.58810294                                                                                                                  | 1.5427231                        | 0.013192612                      |                                  | 0.03231226  |
| 0.99                                                                                                                        | 1958                             | "tags=35%, list=12%, signal=39%" |                                  |             |
| REACTOME_DEADENYLATION_OF_MRNA                                                                                              |                                  | REACTOME_DEADENYLATION_OF_MRNA   |                                  |             |
|                                                                                                                             | 17                               | 0.6533003                        | 1.5318488                        | 0.024423338 |
| 0.035981923                                                                                                                 | 0.995                            | 3951                             | "tags=71%, list=25%, signal=93%" |             |
| REACTOME_GENERATION_OF_SECOND_MESSENGER_MOLECULES                                                                           |                                  |                                  |                                  |             |
| REACTOME_GENERATION_OF_SECOND_MESSENGER_MOLECULES                                                                           |                                  |                                  |                                  | 19          |
| 0.6289413                                                                                                                   | 1.531593                         | 0.02631579                       | 0.03585712                       | 0.995       |
| 3347                                                                                                                        | "tags=53%, list=21%, signal=66%" |                                  |                                  |             |
| REACTOME_RESOLUTION_OF_AP_SITES_VIA_THE_MULTIPLE_NUCLEOTIDE_PATCH_REPLACEMENT_PATHWAY                                       |                                  |                                  |                                  |             |
| REACTOME_RESOLUTION_OF_AP_SITES_VIA_THE_MULTIPLE_NUCLEOTIDE_PATCH_REPLACEMENT_PATHWAY                                       |                                  |                                  |                                  | 17          |
|                                                                                                                             |                                  |                                  | 0.64834094                       |             |
| 1.5262007                                                                                                                   | 0.026760563                      | 0.037770435                      |                                  | 0.996       |
| 2690                                                                                                                        | "tags=53%, list=17%, signal=63%" |                                  |                                  |             |
| REACTOME_PLATELET_ACTIVATION_SIGNALING_AND_AGGREGATION                                                                      |                                  |                                  |                                  |             |
| REACTOME_PLATELET_ACTIVATION_SIGNALING_AND_AGGREGATION                                                                      |                                  |                                  |                                  |             |
| 178                                                                                                                         | 0.46318376                       | 1.5216906                        | 0                                | 0.03939347  |
| 0.997                                                                                                                       | 2052                             | "tags=29%, list=13%, signal=32%" |                                  |             |
| REACTOME_LYSOSOME_VESICLE_BIOGENESIS                                                                                        |                                  |                                  |                                  |             |
| REACTOME_LYSOSOME_VESICLE_BIOGENESIS                                                                                        |                                  |                                  |                                  | 18          |
| 0.6262256                                                                                                                   | 1.5216589                        | 0.027061855                      |                                  | 0.03916722  |
| 0.997                                                                                                                       | 2915                             | "tags=56%, list=18%, signal=68%" |                                  |             |
| REACTOME_BASE_EXCISION_REPAIR                                                                                               |                                  | REACTOME_BASE_EXCISION_REPAIR    |                                  |             |
|                                                                                                                             | 19                               | 0.6275396                        | 1.5186992                        | 0.034574468 |
| 0.040160246                                                                                                                 | 0.998                            | 2690                             | "tags=47%, list=17%, signal=57%" |             |
| REACTOME_OTHER_SEMAPHORIN_INTERACTIONS                                                                                      |                                  |                                  |                                  |             |
| REACTOME_OTHER_SEMAPHORIN_INTERACTIONS                                                                                      |                                  |                                  |                                  | 15          |
| 0.65096515                                                                                                                  | 1.5168                           | 0.035063114                      | 0.040771037                      | 0.998       |
| 3168                                                                                                                        | "tags=47%, list=20%, signal=58%" |                                  |                                  |             |
| REACTOME_APOPTOTIC_EXECUTION_PHASE                                                                                          |                                  |                                  |                                  |             |
| REACTOME_APOPTOTIC_EXECUTION_PHASE                                                                                          |                                  |                                  |                                  | 45          |
| 0.5342928                                                                                                                   | 1.5164152                        | 0.014234875                      |                                  | 0.04065423  |
| 0.998                                                                                                                       | 3681                             | "tags=56%, list=23%, signal=72%" |                                  |             |
| REACTOME_INSULIN_RECEPTOR_RECYCLING                                                                                         |                                  |                                  |                                  |             |
| REACTOME_INSULIN_RECEPTOR_RECYCLING                                                                                         |                                  |                                  |                                  | 19          |
| 0.6197653                                                                                                                   | 1.5160776                        | 0.038356163                      |                                  | 0.04058078  |
| 0.998                                                                                                                       | 4179                             | "tags=58%, list=26%, signal=78%" |                                  |             |
| REACTOME_DIABETES_PATHWAYS                                                                                                  |                                  | REACTOME_DIABETES_PATHWAYS       |                                  |             |
|                                                                                                                             | 103                              | 0.48451638                       | 1.51457                          | 0.003282276 |

0.04104693 0.998 3533 "tags=40%, list=22%, signal=51%"  
REACTOME\_CTLA4\_INHIBITORY\_SIGNALING  
REACTOME\_CTLA4\_INHIBITORY\_SIGNALING 18  
0.6183529 1.5137483 0.026279392 0.041229915  
0.998 1988 "tags=61%, list=12%, signal=70%"  
REACTOME\_SIGNALING\_BY\_ERBB4 REACTOME\_SIGNALING\_BY\_ERBB4  
72 0.4966521 1.5028979 0.01849711  
0.045822594 0.998 2986 "tags=33%, list=19%, signal=41%"  
REACTOME\_CHOLESTEROL\_BIOSYNTHESIS REACTOME\_CHOLESTEROL\_BIOSYNTHESIS  
15 0.6607252 1.5009083 0.030054646  
0.046495333 0.998 2491 "tags=47%, list=15%, signal=55%"  
REACTOME\_EGFR\_DOWNREGULATION REACTOME\_EGFR\_DOWNREGULATION  
21 0.6057746 1.5001383 0.047557842  
0.046629004 0.998 2559 "tags=62%, list=16%, signal=74%"  
REACTOME\_RNA\_POL\_II\_TRANSCRIPTION\_PRE\_INITIATION\_AND\_PROMOTER\_OPENIN  
G  
REACTOME\_RNA\_POL\_II\_TRANSCRIPTION\_PRE\_INITIATION\_AND\_PROMOTER\_OPENIN  
G 31 0.5594787 1.4969417  
0.038961038 0.04776846 0.998 4754 "tags=68%,  
list=30%, signal=96%"  
REACTOME\_SHC1\_EVENTS\_IN\_ERBB4\_SIGNALING  
REACTOME\_SHC1\_EVENTS\_IN\_ERBB4\_SIGNALING 16  
0.6376965 1.4928368 0.044058744 0.04953755  
1 5284 "tags=81%, list=33%, signal=121%"  
REACTOME\_LATENT\_INFECTION\_OF\_HOMO\_SAPIENS\_WITH\_MYCOBACTERIUM\_TUBERCU  
LOSIS  
REACTOME\_LATENT\_INFECTION\_OF\_HOMO\_SAPIENS\_WITH\_MYCOBACTERIUM\_TUBERCU  
LOSIS 28 0.56258905 1.4894764  
0.03937008 0.051070616 1 2115 "tags=32%,  
list=13%, signal=37%"  
REACTOME\_CLEAVAGE\_OF\_GROWING\_TRANSCRIPT\_IN\_THE\_TERMINATION\_REGION\_  
REACTOME\_CLEAVAGE\_OF\_GROWING\_TRANSCRIPT\_IN\_THE\_TERMINATION\_REGION\_  
28 0.5705338 1.4870299 0.035714287  
0.051901374 1 3733 "tags=57%, list=23%, signal=74%"  
REACTOME\_SIGNALING\_BY\_INSULIN\_RECEPTOR  
REACTOME\_SIGNALING\_BY\_INSULIN\_RECEPTOR 90  
0.48083267 1.4869583 0.001106195 0.05163475  
1 4179 "tags=39%, list=26%, signal=52%"  
REACTOME\_REGULATION\_OF\_HYPOXIA\_INDUCIBLE\_FACTOR\_HIF\_BY\_OXYGEN  
REACTOME\_REGULATION\_OF\_HYPOXIA\_INDUCIBLE\_FACTOR\_HIF\_BY\_OXYGEN  
21 0.5862116 1.486153 0.031128405  
0.051741984 1 3270 "tags=48%, list=20%, signal=60%"  
REACTOME\_TRANS\_GOLGI\_NETWORK\_VESICLE\_BUDDING  
REACTOME\_TRANS\_GOLGI\_NETWORK\_VESICLE\_BUDDING 48  
0.50925297 1.4786589 0.03206651 0.05534111  
1 2915 "tags=38%, list=18%, signal=46%"  
REACTOME\_DOWNREGULATION\_OF\_TGF\_BETA\_RECEPTOR\_SIGNALING  
REACTOME\_DOWNREGULATION\_OF\_TGF\_BETA\_RECEPTOR\_SIGNALING  
17 0.6280016 1.4781026 0.040221915  
0.05528069 1 3725 "tags=59%, list=23%, signal=76%"  
REACTOME\_METABOLISM\_OF\_AMINO\_ACIDS\_AND\_DERIVATIVES  
REACTOME\_METABOLISM\_OF\_AMINO\_ACIDS\_AND\_DERIVATIVES 169  
0.44886824 1.4695334 0.003125 0.059624087 1  
3075 "tags=34%, list=19%, signal=41%"

|                                                     |                                   |                                  |                                  |
|-----------------------------------------------------|-----------------------------------|----------------------------------|----------------------------------|
| REACTOME_SIGNALING_BY_SCF_KIT                       | REACTOME_SIGNALING_BY_SCF_KIT     |                                  |                                  |
| 64                                                  | 0.49729866                        | 1.4662116                        | 0.017381229                      |
| 0.06099129                                          | 1                                 | 2020                             | "tags=33%, list=13%, signal=37%" |
| REACTOME_SIGNALING_BY_NOTCH                         | REACTOME_SIGNALING_BY_NOTCH       |                                  |                                  |
| 90                                                  | 0.4654709                         | 1.4477421                        | 0.010952903                      |
| 0.07214959                                          | 1                                 | 3410                             | "tags=38%, list=21%, signal=48%" |
| REACTOME_GOLGI_ASSOCIATED_VESICLE_BIOGENESIS        |                                   |                                  |                                  |
| REACTOME_GOLGI_ASSOCIATED_VESICLE_BIOGENESIS        |                                   |                                  | 43                               |
| 0.5124902                                           | 1.4454365                         | 0.02166065                       | 0.07329529                       |
| 1                                                   | 2915                              | "tags=37%, list=18%, signal=45%" |                                  |
| REACTOME_IL_2_SIGNALING                             | REACTOME_IL_2_SIGNALING           |                                  | 38                               |
| 0.5272081                                           | 1.4430958                         | 0.024125453                      | 0.07451256                       |
| 1                                                   | 2788                              | "tags=39%, list=17%, signal=48%" |                                  |
| REACTOME_SIGNALING_BY_RHO_GTPASES                   | REACTOME_SIGNALING_BY_RHO_GTPASES |                                  |                                  |
| 81                                                  | 0.46811026                        | 1.4415308                        | 0.023359288                      |
| 0.075124696                                         | 1                                 | 1951                             | "tags=22%, list=12%, signal=25%" |
| REACTOME_MAP_KINASE_ACTIVATION_IN_TLR_CASCADE       |                                   |                                  |                                  |
| REACTOME_MAP_KINASE_ACTIVATION_IN_TLR_CASCADE       |                                   |                                  | 42                               |
| 0.51065904                                          | 1.4413218                         | 0.033573143                      | 0.07486099                       |
| 1                                                   | 3051                              | "tags=40%, list=19%, signal=50%" |                                  |
| REACTOME_MEMBRANE_TRAFFICKING                       | REACTOME_MEMBRANE_TRAFFICKING     |                                  |                                  |
| 106                                                 | 0.45771813                        | 1.4372097                        | 0.011956521                      |
| 0.07731212                                          | 1                                 | 2975                             | "tags=34%, list=18%, signal=41%" |
| REACTOME_TRNA_AMINOACYLATION                        | REACTOME_TRNA_AMINOACYLATION      |                                  |                                  |
| 37                                                  | 0.51880366                        | 1.4305457                        | 0.041198503                      |
| 0.081851564                                         | 1                                 | 2930                             | "tags=46%, list=18%, signal=56%" |
| REACTOME_SIGNALING_BY_ERBB2                         | REACTOME_SIGNALING_BY_ERBB2       |                                  |                                  |
| 81                                                  | 0.46478215                        | 1.4232733                        | 0.012208657                      |
| 0.08668588                                          | 1                                 | 3286                             | "tags=41%, list=20%, signal=51%" |
| REACTOME_CYTOKINE_SIGNALING_IN_IMMUNE_SYSTEM        |                                   |                                  |                                  |
| REACTOME_CYTOKINE_SIGNALING_IN_IMMUNE_SYSTEM        |                                   |                                  | 213                              |
| 0.42438123                                          | 1.4231553                         | 0                                | 0.08638959                       |
| 3379                                                | "tags=40%, list=21%, signal=50%"  |                                  | 1                                |
| REACTOME_PKB_MEDIATED_EVENTS                        | REACTOME_PKB_MEDIATED_EVENTS      |                                  |                                  |
| 22                                                  | 0.57329684                        | 1.4224935                        | 0.052700922                      |
| 0.08639353                                          | 1                                 | 3898                             | "tags=55%, list=24%, signal=72%" |
| REACTOME_PROCESSING_OF_CAPPED_INTRONLESS_PRE_MRNA   |                                   |                                  |                                  |
| REACTOME_PROCESSING_OF_CAPPED_INTRONLESS_PRE_MRNA   |                                   |                                  | 19                               |
| 0.5811632                                           | 1.4044877                         | 0.071614586                      | 0.10044746                       |
| 1                                                   | 2541                              | "tags=47%, list=16%, signal=56%" |                                  |
| REACTOME_G_ALPHA1213_SIGNALLING_EVENTS              |                                   |                                  |                                  |
| REACTOME_G_ALPHA1213_SIGNALLING_EVENTS              |                                   |                                  | 62                               |
| 0.4705548                                           | 1.4008491                         | 0.03207331                       | 0.10297428                       |
| 1                                                   | 2988                              | "tags=32%, list=19%, signal=39%" |                                  |
| REACTOME_LIPID_DIGESTION_MOBILIZATION_AND_TRANSPORT |                                   |                                  |                                  |
| REACTOME_LIPID_DIGESTION_MOBILIZATION_AND_TRANSPORT |                                   |                                  |                                  |
| 37                                                  | 0.5067276                         | 1.3982203                        | 0.058894232                      |
| 0.10484053                                          | 1                                 | 1717                             | "tags=22%, list=11%, signal=24%" |
| REACTOME_INSULIN_RECEPTOR_SIGNALLING_CASCADE        |                                   |                                  |                                  |
| REACTOME_INSULIN_RECEPTOR_SIGNALLING_CASCADE        |                                   |                                  | 72                               |
| 0.45837775                                          | 1.3944067                         | 0.03644647                       | 0.107554585                      |
| 1                                                   | 3114                              | "tags=29%, list=19%, signal=36%" |                                  |
| REACTOME_TRANSFERRIN_ENDOCYTOSIS_AND_RECYCLING      |                                   |                                  |                                  |
| REACTOME_TRANSFERRIN_ENDOCYTOSIS_AND_RECYCLING      |                                   |                                  | 21                               |

|                                                                                   |                                |                                  |                                  |
|-----------------------------------------------------------------------------------|--------------------------------|----------------------------------|----------------------------------|
| 0.5689315                                                                         | 1.3941731                      | 0.07919463                       | 0.10718353                       |
| 1                                                                                 | 4179                           | "tags=48%, list=26%, signal=64%" |                                  |
| REACTOME_DEVELOPMENTAL_BIOLOGY                                                    | REACTOME_DEVELOPMENTAL_BIOLOGY |                                  |                                  |
|                                                                                   | 320                            | 0.41610628                       | 1.3940388                        |
| 0.10676829                                                                        | 1                              | 3225                             | "tags=28%, list=20%, signal=34%" |
| REACTOME_PLATELET_AGGREGATION_PLUG_FORMATION                                      |                                |                                  |                                  |
| REACTOME_PLATELET_AGGREGATION_PLUG_FORMATION                                      |                                |                                  | 32                               |
| 0.5189374                                                                         | 1.3908336                      | 0.07033248                       | 0.10905019                       |
| 1                                                                                 | 1958                           | "tags=28%, list=12%, signal=32%" |                                  |
| REACTOME_IRON_UPTAKE_AND_TRANSPORT                                                |                                |                                  |                                  |
| REACTOME_IRON_UPTAKE_AND_TRANSPORT                                                |                                |                                  | 30                               |
| 0.5132028                                                                         | 1.3858503                      | 0.086185046                      | 0.11278215                       |
| 1                                                                                 | 4179                           | "tags=43%, list=26%, signal=58%" |                                  |
| REACTOME_NOTCH1_INTRACELLULAR_DOMAIN_REGULATES_TRANSCRIPTION                      |                                |                                  |                                  |
| REACTOME_NOTCH1_INTRACELLULAR_DOMAIN_REGULATES_TRANSCRIPTION                      |                                |                                  |                                  |
|                                                                                   | 38                             | 0.50318706                       | 1.3858489                        |
| 0.11222657                                                                        | 1                              | 3270                             | "tags=37%, list=20%, signal=46%" |
| REACTOME_DOWNSTREAM_SIGNALING_OF_ACTIVATED_FGFR                                   |                                |                                  |                                  |
| REACTOME_DOWNSTREAM_SIGNALING_OF_ACTIVATED_FGFR                                   |                                |                                  | 87                               |
| 0.44470233                                                                        | 1.3835279                      | 0.028792912                      | 0.113802545                      |
| 1                                                                                 | 3004                           | "tags=31%, list=19%, signal=38%" |                                  |
| REACTOME_OXYGEN_DEPENDENT_PROLINE_HYDROXYLATION_OF_HYPOXIA_INDUCIBLE_FACTOR_ALPHA |                                |                                  |                                  |
| REACTOME_OXYGEN_DEPENDENT_PROLINE_HYDROXYLATION_OF_HYPOXIA_INDUCIBLE_FACTOR_ALPHA |                                | 15                               | 0.6024506                        |
| 0.092769444                                                                       | 0.11653545                     | 1                                | 3270                             |
|                                                                                   |                                |                                  | "tags=47%, list=20%, signal=58%" |
| REACTOME_SIGNALING_BY_NOTCH1                                                      | REACTOME_SIGNALING_BY_NOTCH1   |                                  |                                  |
|                                                                                   | 61                             | 0.46326584                       | 1.3768913                        |
| 0.11886141                                                                        | 1                              | 3270                             | "tags=34%, list=20%, signal=43%" |
| REACTOME_PI3K_AKT_ACTIVATION                                                      | REACTOME_PI3K_AKT_ACTIVATION   |                                  |                                  |
|                                                                                   | 30                             | 0.51620746                       | 1.3754896                        |
| 0.11967617                                                                        | 1                              | 2126                             | "tags=33%, list=13%, signal=38%" |
| REACTOME_MAPK_TARGETS_NUCLEAR_EVENTS_MEDIATED_BY_MAP_KINASES                      |                                |                                  |                                  |
| REACTOME_MAPK_TARGETS_NUCLEAR_EVENTS_MEDIATED_BY_MAP_KINASES                      |                                |                                  |                                  |
|                                                                                   | 27                             | 0.52466226                       | 1.3697917                        |
| 0.124757424                                                                       | 1                              | 3051                             | "tags=48%, list=19%, signal=59%" |
| REACTOME_SIGNALING_BY_CONSTITUTIVELY_ACTIVE_EGFR                                  |                                |                                  |                                  |
| REACTOME_SIGNALING_BY_CONSTITUTIVELY_ACTIVE_EGFR                                  |                                |                                  | 15                               |
| 0.594575                                                                          | 1.3693995                      | 0.09324324                       | 0.12455175                       |
| 4849                                                                              |                                |                                  | "tags=67%, list=30%, signal=95%" |
| REACTOME_METABOLISM_OF_CARBOHYDRATES                                              |                                |                                  |                                  |
| REACTOME_METABOLISM_OF_CARBOHYDRATES                                              |                                |                                  | 202                              |
| 0.41117728                                                                        | 1.369196                       | 0.005138746                      | 0.124184676                      |
| 2948                                                                              |                                |                                  | "tags=28%, list=18%, signal=34%" |
| REACTOME_GAB1_SIGNALOSOME                                                         | REACTOME_GAB1_SIGNALOSOME      |                                  | 32                               |
| 0.51564765                                                                        | 1.3673989                      | 0.0797546                        | 0.12526618                       |
| 1                                                                                 | 2006                           | "tags=31%, list=12%, signal=36%" |                                  |
| REACTOME_CA_DEPENDENT_EVENTS                                                      | REACTOME_CA_DEPENDENT_EVENTS   |                                  |                                  |
|                                                                                   | 26                             | 0.5409789                        | 1.367129                         |
| 0.12494292                                                                        | 1                              | 3927                             | "tags=58%, list=24%, signal=76%" |
| REACTOME_OPIOID_SIGNALLING                                                        | REACTOME_OPIOID_SIGNALLING     |                                  |                                  |
|                                                                                   | 72                             | 0.451319                         | 1.3653657                        |
| 0.12600851                                                                        | 1                              | 3286                             | "tags=42%, list=20%, signal=52%" |

|                                                                    |                                                                    |                                   |                                  |
|--------------------------------------------------------------------|--------------------------------------------------------------------|-----------------------------------|----------------------------------|
| REACTOME_SIGNALING_BY_FGFR                                         | REACTOME_SIGNALING_BY_FGFR                                         |                                   |                                  |
| 96                                                                 | 0.4349534                                                          | 1.365025                          | 0.035869565                      |
| 0.1257539                                                          | 1                                                                  | 3286                              | "tags=34%, list=20%, signal=43%" |
| REACTOME_SIGNALLING_TO_ERKS                                        | REACTOME_SIGNALLING_TO_ERKS                                        |                                   |                                  |
| 29                                                                 | 0.51831084                                                         | 1.3638144                         | 0.09147095                       |
| 0.12634799                                                         | 1                                                                  | 4739                              | "tags=48%, list=29%, signal=68%" |
| REACTOME_DOWNSTREAM_SIGNAL_TRANSDUCTION                            | REACTOME_DOWNSTREAM_SIGNAL_TRANSDUCTION                            |                                   |                                  |
|                                                                    |                                                                    |                                   | 81                               |
| 0.43959624                                                         | 1.3521423                                                          | 0.056369785                       | 0.13755772                       |
| 1                                                                  | 3347                                                               | "tags=36%, list=21%, signal=45%"  |                                  |
| REACTOME_PRE_NOTCH_EXPRESSION_AND_PROCESSING                       | REACTOME_PRE_NOTCH_EXPRESSION_AND_PROCESSING                       |                                   |                                  |
|                                                                    |                                                                    |                                   | 37                               |
| 0.49640688                                                         | 1.3504195                                                          | 0.079404466                       | 0.13866757                       |
| 1                                                                  | 2413                                                               | "tags=41%, list=15%, signal=48%"  |                                  |
| REACTOME_SIGNALLING_TO_RAS                                         | REACTOME_SIGNALLING_TO_RAS                                         |                                   |                                  |
| 22                                                                 | 0.5413619                                                          | 1.3473772                         | 0.10396717                       |
| 0.1411887                                                          | 1                                                                  | 4739                              | "tags=55%, list=29%, signal=77%" |
| REACTOME_CD28_CO_STIMULATION                                       | REACTOME_CD28_CO_STIMULATION                                       |                                   |                                  |
| 25                                                                 | 0.52811235                                                         | 1.3440611                         | 0.0931436                        |
| 0.1441658                                                          | 1                                                                  | 1988                              | "tags=40%, list=12%, signal=46%" |
| REACTOME_SIGNALING_BY_FGFR_IN_DISEASE                              | REACTOME_SIGNALING_BY_FGFR_IN_DISEASE                              |                                   |                                  |
|                                                                    |                                                                    |                                   | 107                              |
| 0.41856766                                                         | 1.3422688                                                          | 0.04756757                        | 0.14523934                       |
| 1                                                                  | 3385                                                               | "tags=34%, list=21%, signal=42%"  |                                  |
| REACTOME_PIP3_ACTIVATES_AKT_SIGNALING                              | REACTOME_PIP3_ACTIVATES_AKT_SIGNALING                              |                                   |                                  |
|                                                                    |                                                                    |                                   | 23                               |
| 0.53431517                                                         | 1.34047                                                            | 0.10381077                        | 0.14651957                       |
| 2006                                                               | "tags=35%, list=12%, signal=40%"                                   |                                   | 1                                |
| REACTOME_GRB2_EVENTS_IN_ERBB2_SIGNALING                            | REACTOME_GRB2_EVENTS_IN_ERBB2_SIGNALING                            |                                   |                                  |
|                                                                    |                                                                    |                                   | 17                               |
| 0.56314963                                                         | 1.3373914                                                          | 0.113513514                       | 0.14908119                       |
| 1                                                                  | 5284                                                               | "tags=71%, list=33%, signal=105%" |                                  |
| REACTOME_TRANSPORT_OF_VITAMINS_NUCLEOSIDES_AND_RELATED_MOLECULES   | REACTOME_TRANSPORT_OF_VITAMINS_NUCLEOSIDES_AND_RELATED_MOLECULES   |                                   |                                  |
|                                                                    |                                                                    |                                   | 26                               |
| 0.15000911                                                         | 0.51263314                                                         | 1.336087                          | 0.090561226                      |
| 1                                                                  | 2810                                                               | "tags=35%, list=17%, signal=42%"  |                                  |
| REACTOME_PROTEIN_FOLDING                                           | REACTOME_PROTEIN_FOLDING                                           |                                   |                                  |
|                                                                    |                                                                    |                                   | 41                               |
| 0.48034793                                                         | 1.3313626                                                          | 0.103831895                       | 0.15435883                       |
| 1                                                                  | 3014                                                               | "tags=37%, list=19%, signal=45%"  |                                  |
| REACTOME_RNA_POL_III_TRANSCRIPTION_INITIATION_FROM_TYPE_2_PROMOTER | REACTOME_RNA_POL_III_TRANSCRIPTION_INITIATION_FROM_TYPE_2_PROMOTER |                                   |                                  |
|                                                                    |                                                                    |                                   | 19                               |
| 0.16066085                                                         | 0.54879355                                                         | 1.3250803                         | 0.125855                         |
| 1                                                                  | 2514                                                               | "tags=42%, list=16%, signal=50%"  |                                  |
| REACTOME_INTERFERON_GAMMA_SIGNALING                                | REACTOME_INTERFERON_GAMMA_SIGNALING                                |                                   |                                  |
|                                                                    |                                                                    |                                   | 41                               |
| 0.46971253                                                         | 1.3242685                                                          | 0.103785105                       | 0.16082138                       |
| 1                                                                  | 3927                                                               | "tags=49%, list=24%, signal=64%"  |                                  |
| REACTOME_INTRINSIC_PATHWAY_FOR_APOPTOSIS                           | REACTOME_INTRINSIC_PATHWAY_FOR_APOPTOSIS                           |                                   |                                  |
|                                                                    |                                                                    |                                   | 27                               |
| 0.5078573                                                          | 1.3212428                                                          | 0.114173226                       | 0.16370907                       |
| 1                                                                  | 3594                                                               | "tags=63%, list=22%, signal=81%"  |                                  |
| REACTOME_TCR_SIGNALING                                             | REACTOME_TCR_SIGNALING                                             |                                   |                                  |
|                                                                    |                                                                    |                                   | 42                               |
| 0.47395182                                                         | 1.3120363                                                          | 0.09951457                        | 0.17386088                       |
| 1                                                                  | 3347                                                               | "tags=40%, list=21%, signal=51%"  |                                  |



|                                                     |                                  |                                  |                                  |            |
|-----------------------------------------------------|----------------------------------|----------------------------------|----------------------------------|------------|
| REACTOME_IL_3_5_AND_GM_CSF_SIGNALING                |                                  |                                  |                                  |            |
| REACTOME_IL_3_5_AND_GM_CSF_SIGNALING                |                                  |                                  |                                  | 39         |
| 0.4736197                                           | 1.3057634                        | 0.117788464                      |                                  | 0.1808304  |
| 1                                                   | 2958                             | "tags=38%, list=18%, signal=47%" |                                  |            |
| REACTOME_PEROXISOMAL_LIPID_METABOLISM               |                                  |                                  |                                  |            |
| REACTOME_PEROXISOMAL_LIPID_METABOLISM               |                                  |                                  |                                  | 19         |
| 0.5458747                                           | 1.3052243                        | 0.12689655                       |                                  | 0.18071304 |
| 1                                                   | 3576                             | "tags=47%, list=22%, signal=61%" |                                  |            |
| REACTOME_NRAGE_SIGNALS_DEATH_THROUGH_JNK            |                                  |                                  |                                  |            |
| REACTOME_NRAGE_SIGNALS_DEATH_THROUGH_JNK            |                                  |                                  |                                  | 32         |
| 0.48870337                                          | 1.3050854                        | 0.10745891                       |                                  | 0.18008006 |
| 1                                                   | 2625                             | "tags=28%, list=16%, signal=34%" |                                  |            |
| REACTOME_IL_RECEPTOR_SHC_SIGNALING                  |                                  |                                  |                                  |            |
| REACTOME_IL_RECEPTOR_SHC_SIGNALING                  |                                  |                                  |                                  | 25         |
| 0.5037273                                           | 1.2890283                        | 0.12631579                       |                                  | 0.19898382 |
| 1                                                   | 2700                             | "tags=36%, list=17%, signal=43%" |                                  |            |
| REACTOME_INTEGRIN_CELL_SURFACE_INTERACTIONS         |                                  |                                  |                                  |            |
| REACTOME_INTEGRIN_CELL_SURFACE_INTERACTIONS         |                                  |                                  |                                  | 72         |
| 0.42530087                                          | 1.2887005                        | 0.09572072                       |                                  | 0.19861762 |
| 1                                                   | 1958                             | "tags=19%, list=12%, signal=22%" |                                  |            |
| REACTOME_GLUCAGON_SIGNALING_IN_METABOLIC_REGULATION |                                  |                                  |                                  |            |
| REACTOME_GLUCAGON_SIGNALING_IN_METABOLIC_REGULATION |                                  |                                  |                                  |            |
| 30                                                  | 0.4889806                        | 1.288609                         | 0.13071066                       | 0.19787735 |
| 1                                                   | 2014                             | "tags=30%, list=13%, signal=34%" |                                  |            |
| REACTOME_APOPTOTIC_CLEAVAGE_OF_CELLULAR_PROTEINS    |                                  |                                  |                                  |            |
| REACTOME_APOPTOTIC_CLEAVAGE_OF_CELLULAR_PROTEINS    |                                  |                                  |                                  | 32         |
| 0.47866452                                          | 1.2817689                        | 0.1425                           | 0.20617211                       | 1          |
| 3927                                                | "tags=56%, list=24%, signal=74%" |                                  |                                  |            |
| REACTOME_PI3K_EVENTS_IN_ERBB2_SIGNALING             |                                  |                                  |                                  |            |
| REACTOME_PI3K_EVENTS_IN_ERBB2_SIGNALING             |                                  |                                  |                                  | 34         |
| 0.4691399                                           | 1.2685235                        | 0.14727722                       |                                  | 0.22331908 |
| 1                                                   | 2006                             | "tags=26%, list=12%, signal=30%" |                                  |            |
| REACTOME_SIGNALING_BY_PDGF                          |                                  |                                  |                                  |            |
| REACTOME_SIGNALING_BY_PDGF                          |                                  |                                  |                                  |            |
| 107                                                 | 0.4016076                        | 1.2673794                        |                                  | 0.09836066 |
| 0.22397995                                          | 1                                | 3004                             | "tags=27%, list=19%, signal=33%" |            |
| REACTOME_INSULIN_SYNTHESIS_AND_PROCESSING           |                                  |                                  |                                  |            |
| REACTOME_INSULIN_SYNTHESIS_AND_PROCESSING           |                                  |                                  |                                  | 15         |
| 0.54891026                                          | 1.2645928                        | 0.17331499                       |                                  | 0.22710156 |
| 1                                                   | 4386                             | "tags=53%, list=27%, signal=73%" |                                  |            |
| REACTOME_TRIF_MEDIATED_TLR3_SIGNALING               |                                  |                                  |                                  |            |
| REACTOME_TRIF_MEDIATED_TLR3_SIGNALING               |                                  |                                  |                                  | 63         |
| 0.4281533                                           | 1.2639191                        | 0.10477299                       |                                  | 0.22706622 |
| 1                                                   | 3270                             | "tags=35%, list=20%, signal=44%" |                                  |            |
| REACTOME_DOWNSTREAM_TCR_SIGNALING                   |                                  |                                  |                                  |            |
| REACTOME_DOWNSTREAM_TCR_SIGNALING                   |                                  |                                  |                                  |            |
| 26                                                  | 0.48458752                       | 1.2637196                        |                                  | 0.15625    |
| 0.22637773                                          | 1                                | 2642                             | "tags=38%, list=16%, signal=46%" |            |
| REACTOME_PI3K_EVENTS_IN_ERBB4_SIGNALING             |                                  |                                  |                                  |            |
| REACTOME_PI3K_EVENTS_IN_ERBB4_SIGNALING             |                                  |                                  |                                  | 30         |
| 0.47562042                                          | 1.2615726                        | 0.15861215                       |                                  | 0.22865681 |
| 1                                                   | 2006                             | "tags=27%, list=12%, signal=30%" |                                  |            |
| REACTOME_POST_TRANSLATIONAL_PROTEIN_MODIFICATION    |                                  |                                  |                                  |            |
| REACTOME_POST_TRANSLATIONAL_PROTEIN_MODIFICATION    |                                  |                                  |                                  | 143        |
| 0.39191654                                          | 1.2592033                        | 0.078306876                      |                                  | 0.23111582 |
| 1                                                   | 3798                             | "tags=37%, list=24%, signal=48%" |                                  |            |

REACTOME\_MYD88\_MAL\_CASCADE\_INITIATED\_ON\_PLASMA\_MEMBRANE  
 REACTOME\_MYD88\_MAL\_CASCADE\_INITIATED\_ON\_PLASMA\_MEMBRANE  
 71 0.4187655 1.2549387 0.12472406  
 0.23637374 1 3051 "tags=34%, list=19%, signal=42%"  
 REACTOME\_THROMBIN\_SIGNALLING\_THROUGH\_PROTEINASE\_ACTIVATED\_RECEPTORS\_PARS  
 REACTOME\_THROMBIN\_SIGNALLING\_THROUGH\_PROTEINASE\_ACTIVATED\_RECEPTORS\_PARS  
 31 0.47291595 1.2535733  
 0.17980295 0.2375061 2014 "tags=35%, list=13%, signal=40%"  
 REACTOME\_DAG\_AND\_IP3\_SIGNALING REACTOME\_DAG\_AND\_IP3\_SIGNALING  
 28 0.4750497 1.2531904 0.16709183  
 0.23716757 1 3286 "tags=46%, list=20%, signal=58%"  
 REACTOME\_MICRORNA\_MIRNA\_BIOGENESIS  
 REACTOME\_MICRORNA\_MIRNA\_BIOGENESIS 17  
 0.52341795 1.2525779 0.1808367 0.23708503  
 1 4097 "tags=59%, list=25%, signal=79%"  
 REACTOME\_ACTIVATED\_NOTCH1\_TRANSMITS\_SIGNAL\_TO\_THE\_NUCLEUS  
 REACTOME\_ACTIVATED\_NOTCH1\_TRANSMITS\_SIGNAL\_TO\_THE\_NUCLEUS  
 24 0.4840843 1.2495642 0.20026526  
 0.24035953 1 1709 "tags=29%, list=11%, signal=33%"  
 REACTOME\_MRNA\_3\_END\_PROCESSING REACTOME\_MRNA\_3\_END\_PROCESSING  
 21 0.4987793 1.2361149 0.2  
 0.25918123 1 3552 "tags=48%, list=22%, signal=61%"  
 REACTOME\_PLC\_BETA\_MEDIATED\_EVENTS REACTOME\_PLC\_BETA\_MEDIATED\_EVENTS  
 38 0.44891536 1.2355055 0.16479401  
 0.25918177 1 3927 "tags=47%, list=24%, signal=62%"  
 REACTOME\_ANTIGEN\_ACTIVATES\_B\_CELL\_RECEPTOR\_LEADING\_TO\_GENERATION\_OF\_SECOND\_MESSENGERS  
 REACTOME\_ANTIGEN\_ACTIVATES\_B\_CELL\_RECEPTOR\_LEADING\_TO\_GENERATION\_OF\_SECOND\_MESSENGERS  
 27 0.48082128  
 1.2348659 0.16494845 0.25911748 1  
 3347 "tags=52%, list=21%, signal=65%"  
 REACTOME\_SYNTHESIS\_SECRETION\_AND\_INACTIVATION\_OF\_GLP1  
 REACTOME\_SYNTHESIS\_SECRETION\_AND\_INACTIVATION\_OF\_GLP1  
 17 0.5144637 1.2325749 0.22252375  
 0.2617169 1 5459 "tags=65%, list=34%, signal=98%"  
 REACTOME\_TRAF6\_MEDIATED\_INDUCTION\_OF\_NFKB\_AND\_MAP\_KINASES\_UPON\_TLR7\_8\_OR\_9\_ACTIVATION  
 REACTOME\_TRAF6\_MEDIATED\_INDUCTION\_OF\_NFKB\_AND\_MAP\_KINASES\_UPON\_TLR7\_8\_OR\_9\_ACTIVATION  
 64 0.41094047 1.232489  
 0.15940367 0.26081252 1 3051 "tags=36%, list=19%, signal=44%"  
 REACTOME\_POST\_NMDA\_RECEPTOR\_ACTIVATION\_EVENTS  
 REACTOME\_POST\_NMDA\_RECEPTOR\_ACTIVATION\_EVENTS 29  
 0.46766838 1.2324373 0.18607596 0.25984812  
 1 2829 "tags=38%, list=18%, signal=46%"  
 REACTOME\_ACYL\_CHAIN\_REMODELLING\_OF\_PS  
 REACTOME\_ACYL\_CHAIN\_REMODELLING\_OF\_PS 15  
 0.5272505 1.228565 0.22115384 0.26482457 1  
 1773 "tags=27%, list=11%, signal=30%"  
 REACTOME\_PI3K\_CASCADE REACTOME\_PI3K\_CASCADE 59  
 0.4183384 1.2266499 0.1616279 0.2666871  
 3406 "tags=27%, list=21%, signal=34%"

REACTOME\_CREB\_PHOSPHORYLATION\_THROUGH\_THE\_ACTIVATION\_OF\_RAS  
 REACTOME\_CREB\_PHOSPHORYLATION\_THROUGH\_THE\_ACTIVATION\_OF\_RAS  
 24 0.48146838 1.226241 0.20316623 0.26623464  
 1 2829 "tags=38%, list=18%, signal=45%"  
 REACTOME\_METABOLISM\_OF\_LIPIDS\_AND\_LIPOPROTEINS  
 REACTOME\_METABOLISM\_OF\_LIPIDS\_AND\_LIPOPROTEINS 395  
 0.35708523 1.2203437 0.034136545 0.27484 1  
 3648 "tags=29%, list=23%, signal=36%"  
 REACTOME\_SIGNALING\_BY\_TGF\_BETA\_RECEPTOR\_COMPLEX  
 REACTOME\_SIGNALING\_BY\_TGF\_BETA\_RECEPTOR\_COMPLEX 50  
 0.424907 1.2199463 0.18072289 0.2743251 1  
 2357 "tags=34%, list=15%, signal=40%"  
 REACTOME\_NUCLEAR\_SIGNALING\_BY\_ERBB4  
 REACTOME\_NUCLEAR\_SIGNALING\_BY\_ERBB4 31  
 0.45640323 1.2179049 0.2244389 0.27646014  
 1 5284 "tags=45%, list=33%, signal=67%"  
 REACTOME\_ACTIVATION\_OF\_NMDA\_RECEPTOR\_UPON\_Glutamate\_BINDING\_AND\_POST  
 SYNAPTIC\_EVENTS  
 REACTOME\_ACTIVATION\_OF\_NMDA\_RECEPTOR\_UPON\_Glutamate\_BINDING\_AND\_POST  
 SYNAPTIC\_EVENTS 33 0.45321473 1.2165005  
 0.20828106 0.27746862 1 2829 "tags=36%,  
 list=18%, signal=44%"  
 REACTOME\_RNA\_POL\_I\_TRANSCRIPTION\_INITIATION  
 REACTOME\_RNA\_POL\_I\_TRANSCRIPTION\_INITIATION 19  
 0.49992546 1.2123783 0.21646747 0.28259194  
 1 4651 "tags=58%, list=29%, signal=81%"  
 REACTOME\_RNA\_POL\_III\_TRANSCRIPTION  
 REACTOME\_RNA\_POL\_III\_TRANSCRIPTION 28  
 0.45576313 1.2084124 0.23126616 0.2880629  
 1 2514 "tags=32%, list=16%, signal=38%"  
 REACTOME\_FATTY\_ACID\_TRIACYLGLYCEROL\_AND\_KETONE\_BODY\_METABOLISM  
 REACTOME\_FATTY\_ACID\_TRIACYLGLYCEROL\_AND\_KETONE\_BODY\_METABOLISM  
 143 0.37382826 1.2049018 0.1256656  
 0.29250348 1 3453 "tags=30%, list=21%, signal=38%"  
 REACTOME\_CD28\_DEPENDENT\_PI3K\_AKT\_SIGNALING  
 REACTOME\_CD28\_DEPENDENT\_PI3K\_AKT\_SIGNALING 18 0.505297  
 1.2038263 0.24696356 0.29305497 1  
 1988 "tags=39%, list=12%, signal=44%"  
 REACTOME\_CELL\_SURFACE\_INTERACTIONS\_AT\_THE\_VASCULAR\_WALL  
 REACTOME\_CELL\_SURFACE\_INTERACTIONS\_AT\_THE\_VASCULAR\_WALL  
 72 0.39667407 1.1961315 0.1804009  
 0.30438137 1 4014 "tags=36%, list=25%, signal=48%"  
 REACTOME\_INTEGRATION\_OF\_ENERGY\_METABOLISM  
 REACTOME\_INTEGRATION\_OF\_ENERGY\_METABOLISM 104  
 0.37871853 1.1923518 0.15098469 0.30969298  
 1 3741 "tags=37%, list=23%, signal=47%"  
 REACTOME\_SPHINGOLIPID\_METABOLISM REACTOME\_SPHINGOLIPID\_METABOLISM  
 50 0.4094894 1.1910682 0.20567375  
 0.31079105 1 5195 "tags=50%, list=32%, signal=74%"  
 REACTOME\_SIGNAL\_AMPLIFICATION REACTOME\_SIGNAL\_AMPLIFICATION  
 29 0.44635376 1.1779573 0.24234694  
 0.33209726 1 3679 "tags=41%, list=23%, signal=54%"  
 REACTOME\_FORMATION\_OF\_TUBULIN\_FOLDING\_INTERMEDIATES\_BY\_CCT\_TRIC  
 REACTOME\_FORMATION\_OF\_TUBULIN\_FOLDING\_INTERMEDIATES\_BY\_CCT\_TRIC

|                                                                      |                                  |                                  |                                  |            |
|----------------------------------------------------------------------|----------------------------------|----------------------------------|----------------------------------|------------|
|                                                                      | 16                               | 0.4988859                        | 1.1650507                        | 0.25306123 |
| 0.3535536                                                            | 1                                | 2917                             | "tags=44%, list=18%, signal=53%" |            |
| REACTOME_G_BETA_GAMMA_SIGNALLING_THROUGH_PI3KGAMMA                   |                                  |                                  |                                  |            |
| REACTOME_G_BETA_GAMMA_SIGNALLING_THROUGH_PI3KGAMMA                   |                                  |                                  |                                  | 24         |
| 0.45623758                                                           | 1.1627133                        | 0.24664879                       | 0.35645515                       |            |
| 1                                                                    | 2876                             | "tags=46%, list=18%, signal=56%" |                                  |            |
| REACTOME_FATTY_ACYL_COA_BIOSYNTHESIS                                 |                                  |                                  |                                  |            |
| REACTOME_FATTY_ACYL_COA_BIOSYNTHESIS                                 |                                  |                                  |                                  | 16         |
| 0.49761885                                                           | 1.1615182                        | 0.29655173                       | 0.3572304                        |            |
| 1                                                                    | 2687                             | "tags=44%, list=17%, signal=52%" |                                  |            |
| REACTOME_STRIATED_MUSCLE_CONTRACTION                                 |                                  |                                  |                                  |            |
| REACTOME_STRIATED_MUSCLE_CONTRACTION                                 |                                  |                                  |                                  | 23         |
| 0.46054882                                                           | 1.1596441                        | 0.2763685                        | 0.35940903                       |            |
| 1                                                                    | 3435                             | "tags=35%, list=21%, signal=44%" |                                  |            |
| REACTOME_TRIGLYCERIDE_BIOSYNTHESIS                                   |                                  |                                  |                                  |            |
| REACTOME_TRIGLYCERIDE_BIOSYNTHESIS                                   |                                  |                                  |                                  | 32         |
| 0.42701283                                                           | 1.1578246                        | 0.27376425                       | 0.3612767                        |            |
| 1                                                                    | 2734                             | "tags=34%, list=17%, signal=41%" |                                  |            |
| REACTOME_INCRETIN_SYNTHESIS_SECRETION_AND_INACTIVATION               |                                  |                                  |                                  |            |
| REACTOME_INCRETIN_SYNTHESIS_SECRETION_AND_INACTIVATION               |                                  |                                  |                                  |            |
| 20                                                                   | 0.47777152                       | 1.154294                         | 0.28820375                       | 0.36637452 |
| 1                                                                    | 5459                             | "tags=65%, list=34%, signal=98%" |                                  |            |
| REACTOME_GLYCOPHINGOLIPID_METABOLISM                                 |                                  |                                  |                                  |            |
| REACTOME_GLYCOPHINGOLIPID_METABOLISM                                 |                                  |                                  |                                  | 31         |
| 0.43511721                                                           | 1.1508249                        | 0.26349613                       | 0.37142828                       |            |
| 1                                                                    | 5080                             | "tags=55%, list=32%, signal=80%" |                                  |            |
| REACTOME_SIGNALING_BY_ROBO_RECEPTOR                                  |                                  |                                  |                                  |            |
| REACTOME_SIGNALING_BY_ROBO_RECEPTOR                                  |                                  |                                  |                                  | 21         |
| 0.46765122                                                           | 1.1505439                        | 0.2931507                        | 0.37065455                       |            |
| 1                                                                    | 1935                             | "tags=29%, list=12%, signal=32%" |                                  |            |
| REACTOME_PREFOLDIN_MEDIATED_TRANSFER_OF_SUBSTRATE_TO_CCT_TRIC        |                                  |                                  |                                  |            |
| REACTOME_PREFOLDIN_MEDIATED_TRANSFER_OF_SUBSTRATE_TO_CCT_TRIC        |                                  |                                  |                                  |            |
|                                                                      | 21                               | 0.46521753                       | 1.1465011                        | 0.30352303 |
| 0.37661865                                                           | 1                                | 2917                             | "tags=43%, list=18%, signal=52%" |            |
| REACTOME_NEUROTRANSMITTER_RECEPTOR_BINDING_AND_DOWNSTREAM_TRANSMISSI |                                  |                                  |                                  |            |
| ON_IN_THE_POSTSYNAPTIC_CELL                                          |                                  |                                  |                                  |            |
| REACTOME_NEUROTRANSMITTER_RECEPTOR_BINDING_AND_DOWNSTREAM_TRANSMISSI |                                  |                                  |                                  |            |
| ON_IN_THE_POSTSYNAPTIC_CELL                                          |                                  |                                  | 119                              | 0.36100492 |
| 1.1462749                                                            | 0.21794872                       | 0.3757098                        | 1                                |            |
| 2829                                                                 | "tags=24%, list=18%, signal=28%" |                                  |                                  |            |
| REACTOME_GPVI_MEDIATED_ACTIVATION_CASCADE                            |                                  |                                  |                                  |            |
| REACTOME_GPVI_MEDIATED_ACTIVATION_CASCADE                            |                                  |                                  |                                  | 30         |
| 0.43010035                                                           | 1.1409236                        | 0.27701864                       | 0.38436112                       |            |
| 1                                                                    | 2876                             | "tags=40%, list=18%, signal=49%" |                                  |            |
| REACTOME_PPARA_ACTIVATES_GENE_EXPRESSION                             |                                  |                                  |                                  |            |
| REACTOME_PPARA_ACTIVATES_GENE_EXPRESSION                             |                                  |                                  |                                  | 89         |
| 0.3651034                                                            | 1.1374336                        | 0.25336322                       | 0.38950095                       |            |
| 1                                                                    | 3894                             | "tags=31%, list=24%, signal=41%" |                                  |            |
| REACTOME_PURINE_METABOLISM                                           |                                  |                                  |                                  |            |
| REACTOME_PURINE_METABOLISM                                           |                                  |                                  |                                  |            |
|                                                                      | 29                               | 0.43587914                       | 1.1349047                        | 0.30472636 |
| 0.39282483                                                           | 1                                | 4301                             | "tags=59%, list=27%, signal=80%" |            |
| REACTOME_SIGNALING_BY_ILS                                            |                                  |                                  |                                  | 95         |
| REACTOME_SIGNALING_BY_ILS                                            |                                  |                                  |                                  |            |
| 0.3601196                                                            | 1.1321762                        | 0.25248072                       | 0.39662513                       |            |
| 1                                                                    | 2986                             | "tags=34%, list=19%, signal=41%" |                                  |            |

|                                                                                |                                                                                |                                  |
|--------------------------------------------------------------------------------|--------------------------------------------------------------------------------|----------------------------------|
| REACTOME_PI_3K_CASCADE                                                         | REACTOME_PI_3K_CASCADE                                                         | 49                               |
| 0.3922303                                                                      | 1.1321337                                                                      | 0.28211284                       |
| 1                                                                              | 2006                                                                           | "tags=18%, list=12%, signal=21%" |
| REACTOME_ENDOSOMAL_SORTING_COMPLEX_REQUIRED_FOR_TRANSPORT_ESCRT                | REACTOME_ENDOSOMAL_SORTING_COMPLEX_REQUIRED_FOR_TRANSPORT_ESCRT                |                                  |
| 21                                                                             | 0.45573264                                                                     | 1.1272072                        |
| 0.40333015                                                                     | 1                                                                              | 3982                             |
| 1                                                                              | 2006                                                                           | "tags=57%, list=25%, signal=76%" |
| REACTOME_NFKB_AND_MAP_KINASES_ACTIVATION_MEDIATED_BY_TLR4_SIGNALING_REPERTOIRE | REACTOME_NFKB_AND_MAP_KINASES_ACTIVATION_MEDIATED_BY_TLR4_SIGNALING_REPERTOIRE |                                  |
| 61                                                                             | 0.37830347                                                                     | 1.1234835                        |
| 0.2848837                                                                      | 0.4087796                                                                      | 1                                |
| 1                                                                              | 3571                                                                           | "tags=36%, list=22%, signal=46%" |
| REACTOME_G_ALPHA_Z_SIGNALLING_EVENTS                                           | REACTOME_G_ALPHA_Z_SIGNALLING_EVENTS                                           | 40                               |
| 0.39743912                                                                     | 1.1206797                                                                      | 0.30184048                       |
| 1                                                                              | 2014                                                                           | "tags=25%, list=13%, signal=29%" |
| REACTOME_G_PROTEIN_BETA_GAMMA_SIGNALLING                                       | REACTOME_G_PROTEIN_BETA_GAMMA_SIGNALLING                                       | 27                               |
| 0.4200036                                                                      | 1.1033555                                                                      | 0.31906614                       |
| 1                                                                              | 2876                                                                           | "tags=41%, list=18%, signal=50%" |
| REACTOME_ENOS_ACTIVATION_AND_REGULATION                                        | REACTOME_ENOS_ACTIVATION_AND_REGULATION                                        | 18                               |
| 0.4563841                                                                      | 1.1031727                                                                      | 0.3430851                        |
| 1                                                                              | 1628                                                                           | "tags=39%, list=10%, signal=43%" |
| REACTOME_TIE2_SIGNALING                                                        | REACTOME_TIE2_SIGNALING                                                        | 16                               |
| 0.4641082                                                                      | 1.0965275                                                                      | 0.3452055                        |
| 1                                                                              | 1977                                                                           | "tags=25%, list=12%, signal=28%" |
| REACTOME_NEPHRIN_INTERACTIONS                                                  | REACTOME_NEPHRIN_INTERACTIONS                                                  |                                  |
| 15                                                                             | 0.47646946                                                                     | 1.0902483                        |
| 0.46624845                                                                     | 1                                                                              | 3347                             |
| 1                                                                              | 3347                                                                           | "tags=40%, list=21%, signal=50%" |
| REACTOME_ADP_SIGNALLING_THROUGH_P2RY12                                         | REACTOME_ADP_SIGNALLING_THROUGH_P2RY12                                         | 19                               |
| 0.4456618                                                                      | 1.0875566                                                                      | 0.36806494                       |
| 1                                                                              | 2763                                                                           | "tags=37%, list=17%, signal=44%" |
| REACTOME_IL1_SIGNALING                                                         | REACTOME_IL1_SIGNALING                                                         | 34                               |
| 0.39861977                                                                     | 1.0753284                                                                      | 0.38131315                       |
| 1                                                                              | 2986                                                                           | "tags=32%, list=19%, signal=40%" |
| REACTOME_ACTIVATED_TLR4_SIGNALLING                                             | REACTOME_ACTIVATED_TLR4_SIGNALLING                                             | 81                               |
| 0.34826952                                                                     | 1.0674802                                                                      | 0.36141908                       |
| 1                                                                              | 2829                                                                           | "tags=28%, list=18%, signal=34%" |
| REACTOME_FORMATION_OF_INCISION_COMPLEX_IN_GG_NER                               | REACTOME_FORMATION_OF_INCISION_COMPLEX_IN_GG_NER                               | 19                               |
| 0.4433623                                                                      | 1.0641192                                                                      | 0.40104848                       |
| 1                                                                              | 4651                                                                           | "tags=53%, list=29%, signal=74%" |
| REACTOME_GABA_SYNTHESIS_RELEASE_REUPTAKE_AND_DEGRADATION                       | REACTOME_GABA_SYNTHESIS_RELEASE_REUPTAKE_AND_DEGRADATION                       |                                  |
| 17                                                                             | 0.44204354                                                                     | 1.0592654                        |
| 0.52082014                                                                     | 1                                                                              | 14                               |
| 1                                                                              | 14                                                                             | "tags=6%, list=0%, signal=6%"    |
| REACTOME_RNA_POL_III_TRANSCRIPTION_TERMINATION                                 | REACTOME_RNA_POL_III_TRANSCRIPTION_TERMINATION                                 | 15                               |
| 0.45738745                                                                     | 1.0563631                                                                      | 0.40189445                       |
| 1                                                                              | 2362                                                                           | "tags=33%, list=15%, signal=39%" |

|                                                                      |                                  |                                  |                                  |                                  |  |
|----------------------------------------------------------------------|----------------------------------|----------------------------------|----------------------------------|----------------------------------|--|
| REACTOME_PHOSPHOLIPID_METABOLISM                                     | REACTOME_PHOSPHOLIPID_METABOLISM |                                  |                                  |                                  |  |
| 159                                                                  | 0.32667845                       | 1.0560291                        | 0.3788038                        |                                  |  |
| 0.5239411                                                            | 1                                | 5080                             | "tags=40%, list=32%, signal=57%" |                                  |  |
| REACTOME_NEGATIVE_REGULATION_OF_FGFR_SIGNALING                       |                                  |                                  |                                  |                                  |  |
| REACTOME_NEGATIVE_REGULATION_OF_FGFR_SIGNALING                       |                                  |                                  |                                  | 33                               |  |
| 0.39328125                                                           | 1.0539385                        | 0.40076336                       | 0.52655345                       |                                  |  |
| 1                                                                    | 1958                             | "tags=21%, list=12%, signal=24%" |                                  |                                  |  |
| REACTOME_REGULATION_OF_WATER_BALANCE_BY_RENAL_AQUAPORINS             |                                  |                                  |                                  |                                  |  |
| REACTOME_REGULATION_OF_WATER_BALANCE_BY_RENAL_AQUAPORINS             |                                  |                                  |                                  |                                  |  |
| 40                                                                   | 0.3781114                        | 1.0498848                        | 0.40243903                       |                                  |  |
| 0.5329458                                                            | 1                                | 2014                             | "tags=25%, list=13%, signal=29%" |                                  |  |
| REACTOME_PLATELET_HOMEOSTASIS                                        | REACTOME_PLATELET_HOMEOSTASIS    |                                  |                                  |                                  |  |
| 71                                                                   | 0.34320095                       | 1.0437512                        | 0.42519686                       |                                  |  |
| 0.54382837                                                           | 1                                | 3743                             | "tags=28%, list=23%, signal=37%" |                                  |  |
| REACTOME_TRANSMISSION_ACROSS_CHEMICAL_SYNAPSES                       |                                  |                                  |                                  |                                  |  |
| REACTOME_TRANSMISSION_ACROSS_CHEMICAL_SYNAPSES                       |                                  |                                  |                                  | 166                              |  |
| 0.32143307                                                           | 1.0426464                        | 0.40226337                       | 0.5442828                        |                                  |  |
| 1                                                                    | 2909                             | "tags=19%, list=18%, signal=23%" |                                  |                                  |  |
| REACTOME_FORMATION_OF_TRANSCRIPTION_COUPLED_NER_TC_NER_REPAIR_COMPLE |                                  |                                  |                                  |                                  |  |
| X                                                                    |                                  |                                  |                                  |                                  |  |
| REACTOME_FORMATION_OF_TRANSCRIPTION_COUPLED_NER_TC_NER_REPAIR_COMPLE |                                  |                                  |                                  |                                  |  |
| X                                                                    | 23                               | 0.40521893                       | 1.0410866                        |                                  |  |
| 0.42302543                                                           | 0.54568195                       | 1                                | 4651                             | "tags=52%, list=29%, signal=73%" |  |
| REACTOME_RNA_POL_III_TRANSCRIPTION_INITIATION_FROM_TYPE_3_PROMOTER   |                                  |                                  |                                  |                                  |  |
| REACTOME_RNA_POL_III_TRANSCRIPTION_INITIATION_FROM_TYPE_3_PROMOTER   |                                  |                                  |                                  |                                  |  |
| 21                                                                   | 0.41680393                       | 1.0372066                        | 0.44625852                       |                                  |  |
| 0.5522046                                                            | 1                                | 2514                             | "tags=33%, list=16%, signal=39%" |                                  |  |
| REACTOME_RNA_POL_I_TRANSCRIPTION_TERMINATION                         |                                  |                                  |                                  |                                  |  |
| REACTOME_RNA_POL_I_TRANSCRIPTION_TERMINATION                         |                                  |                                  |                                  | 16                               |  |
| 0.43861082                                                           | 1.0372064                        | 0.43539324                       | 0.55038816                       |                                  |  |
| 1                                                                    | 4651                             | "tags=50%, list=29%, signal=70%" |                                  |                                  |  |
| REACTOME_INNATE_IMMUNE_SYSTEM                                        | REACTOME_INNATE_IMMUNE_SYSTEM    |                                  |                                  |                                  |  |
| 190                                                                  | 0.31323275                       | 1.03396                          | 0.4376931                        |                                  |  |
| 0.55528086                                                           | 1                                | 2829                             | "tags=26%, list=18%, signal=32%" |                                  |  |
| REACTOME_REGULATION_OF_SIGNALING_BY_CBL                              |                                  |                                  |                                  |                                  |  |
| REACTOME_REGULATION_OF_SIGNALING_BY_CBL                              |                                  |                                  |                                  | 16                               |  |
| 0.4428787                                                            | 1.0334655                        | 0.44459644                       | 0.55443305                       |                                  |  |
| 1                                                                    | 2958                             | "tags=31%, list=18%, signal=38%" |                                  |                                  |  |
| REACTOME_PRE_NOTCH_TRANSCRIPTION_AND_TRANSLATION                     |                                  |                                  |                                  |                                  |  |
| REACTOME_PRE_NOTCH_TRANSCRIPTION_AND_TRANSLATION                     |                                  |                                  |                                  | 24                               |  |
| 0.401224                                                             | 1.0327336                        | 0.42444152                       | 0.5540947                        |                                  |  |
| 4062                                                                 | "tags=50%, list=25%, signal=67%" |                                  |                                  |                                  |  |
| REACTOME_SIGNALING_BY_HIPPO                                          | REACTOME_SIGNALING_BY_HIPPO      |                                  |                                  |                                  |  |
| 16                                                                   | 0.43369883                       | 1.0196912                        | 0.4480432                        |                                  |  |
| 0.5785788                                                            | 1                                | 4940                             | "tags=50%, list=31%, signal=72%" |                                  |  |
| REACTOME_ACTIVATION_OF_KAINATE_RECEPTORS_UPON GLUTAMATE_BINDING      |                                  |                                  |                                  |                                  |  |
| REACTOME_ACTIVATION_OF_KAINATE_RECEPTORS_UPON GLUTAMATE_BINDING      |                                  |                                  |                                  |                                  |  |
| 29                                                                   | 0.38892907                       | 1.01944                          | 0.47409326                       |                                  |  |
| 0.57720757                                                           | 1                                | 2763                             | "tags=31%, list=17%, signal=37%" |                                  |  |
| REACTOME_SIGNALING_BY_FGFR1_FUSION_MUTANTS                           |                                  |                                  |                                  |                                  |  |
| REACTOME_SIGNALING_BY_FGFR1_FUSION_MUTANTS                           |                                  |                                  |                                  | 15                               |  |
| 0.43399853                                                           | 1.017579                         | 0.4488712                        | 0.57907397                       |                                  |  |
| 5630                                                                 | "tags=60%, list=35%, signal=92%" |                                  |                                  | 1                                |  |

REACTOME\_THROMBOXANE\_SIGNALLING\_THROUGH\_TP\_RECEPTOR  
 REACTOME\_THROMBOXANE\_SIGNALLING\_THROUGH\_TP\_RECEPTOR  
 22 0.40807655 1.0146043 0.4814815 0.583477  
 1 2014 "tags=27%, list=13%, signal=31%"  
 REACTOME\_SULFUR\_AMINO\_ACID\_METABOLISM  
 REACTOME\_SULFUR\_AMINO\_ACID\_METABOLISM 21  
 0.40635842 1.0111812 0.46866485 0.5887128  
 1 5281 "tags=57%, list=33%, signal=85%"  
 REACTOME\_SLC\_MEDIATED\_TRANSMEMBRANE\_TRANSPORT  
 REACTOME\_SLC\_MEDIATED\_TRANSMEMBRANE\_TRANSPORT 211  
 0.30356 1.0059482 0.491353 0.59726053 1  
 4224 "tags=26%, list=26%, signal=35%"  
 REACTOME\_PHOSPHOLIPASE\_C\_MEDIATED\_CASCADE  
 REACTOME\_PHOSPHOLIPASE\_C\_MEDIATED\_CASCADE 49  
 0.34682494 1.0021098 0.48739496 0.6030427  
 1 3286 "tags=27%, list=20%, signal=33%"  
 REACTOME\_ASSOCIATION\_OF\_TRIC\_CCT\_WITH\_TARGET\_PROTEINS\_DURING\_BIOSYNT  
 HESIS  
 REACTOME\_ASSOCIATION\_OF\_TRIC\_CCT\_WITH\_TARGET\_PROTEINS\_DURING\_BIOSYNT  
 HESIS 23 0.3932797 1.0008059  
 0.48021108 0.60367227 1 5068 "tags=48%,  
 list=31%, signal=70%"  
 REACTOME\_GLYCEROPHOSPHOLIPID\_BIOSYNTHESIS  
 REACTOME\_GLYCEROPHOSPHOLIPID\_BIOSYNTHESIS 70  
 0.33080915 1.0003648 0.48350397 0.6025836  
 1 5356 "tags=39%, list=33%, signal=58%"  
 REACTOME\_ADP\_SIGNALLING\_THROUGH\_P2RY1  
 REACTOME\_ADP\_SIGNALLING\_THROUGH\_P2RY1 24  
 0.39727604 1.00033 0.48687664 0.6007422 1  
 3051 "tags=33%, list=19%, signal=41%"  
 REACTOME\_PERK\_REGULATED\_GENE\_EXPRESSION  
 REACTOME\_PERK\_REGULATED\_GENE\_EXPRESSION 21  
 0.39879778 0.99224234 0.4812903 0.61535025  
 1 3487 "tags=38%, list=22%, signal=49%"  
 REACTOME\_PKA\_MEDIATED\_PHOSPHORYLATION\_OF\_CREB  
 REACTOME\_PKA\_MEDIATED\_PHOSPHORYLATION\_OF\_CREB 15  
 0.43633595 0.9911224 0.5155807 0.615563 1  
 3286 "tags=40%, list=20%, signal=50%"  
 REACTOME\_TOLL\_RECEPTOR\_CASCADES REACTOME\_TOLL\_RECEPTOR\_CASCADES  
 98 0.31087464 0.99026185 0.4977827  
 0.6153422 1 2829 "tags=27%, list=18%, signal=32%"  
 REACTOME\_SYNTHESIS\_OF\_PA REACTOME\_SYNTHESIS\_OF\_PA 24  
 0.38889664 0.9887992 0.48914433 0.6163913  
 1 3619 "tags=33%, list=22%, signal=43%"  
 REACTOME\_EFFECTS\_OF\_PIP2\_HYDROLYSIS  
 REACTOME\_EFFECTS\_OF\_PIP2\_HYDROLYSIS 22  
 0.39202818 0.98717725 0.5152318 0.6176327  
 1 3927 "tags=36%, list=24%, signal=48%"  
 REACTOME\_TRANSPORT\_TO\_THE\_GOLGI\_AND\_SUBSEQUENT\_MODIFICATION  
 REACTOME\_TRANSPORT\_TO\_THE\_GOLGI\_AND\_SUBSEQUENT\_MODIFICATION  
 30 0.37257278 0.98187286 0.50125 0.62634236  
 1 3608 "tags=40%, list=22%, signal=51%"  
 REACTOME\_AQUAPORIN\_MEDIATED\_TRANSPORT  
 REACTOME\_AQUAPORIN\_MEDIATED\_TRANSPORT 46

|                                                                 |                                  |                                  |                                  |                                  |
|-----------------------------------------------------------------|----------------------------------|----------------------------------|----------------------------------|----------------------------------|
| 0.34712666                                                      | 0.975205                         | 0.5356711                        | 0.6374958                        | 1                                |
| 2014                                                            | "tags=22%, list=13%, signal=25%" |                                  |                                  |                                  |
| REACTOME_METAL_ION_SLC_TRANSPORTERS                             |                                  |                                  |                                  |                                  |
| REACTOME_METAL_ION_SLC_TRANSPORTERS                             |                                  |                                  |                                  | 19                               |
| 0.40363133                                                      | 0.9745841                        | 0.52005535                       | 0.63671607                       |                                  |
| 1                                                               | 4675                             | "tags=42%, list=29%, signal=59%" |                                  |                                  |
| REACTOME_TRANSMEMBRANE_TRANSPORT_OF_SMALL_MOLECULES             |                                  |                                  |                                  |                                  |
| REACTOME_TRANSMEMBRANE_TRANSPORT_OF_SMALL_MOLECULES             |                                  |                                  |                                  |                                  |
| 356                                                             | 0.28757602                       | 0.9745736                        | 0.5780463                        |                                  |
| 0.63478553                                                      | 1                                | 4288                             | "tags=27%, list=27%, signal=36%" |                                  |
| REACTOME_PROSTACYCLIN_SIGNALLING_THROUGH_PROSTACYCLIN_RECEPTOR  |                                  |                                  |                                  |                                  |
| REACTOME_PROSTACYCLIN_SIGNALLING_THROUGH_PROSTACYCLIN_RECEPTOR  |                                  |                                  |                                  |                                  |
|                                                                 | 18                               | 0.407628                         | 0.9711098                        | 0.51424694                       |
| 0.6396208                                                       | 1                                | 2763                             | "tags=33%, list=17%, signal=40%" |                                  |
| REACTOME_DESTABILIZATION_OF_MRNA_BY_TRISTETRAPROLIN_TTP         |                                  |                                  |                                  |                                  |
| REACTOME_DESTABILIZATION_OF_MRNA_BY_TRISTETRAPROLIN_TTP         |                                  |                                  |                                  |                                  |
| 15                                                              | 0.41718024                       | 0.96045655                       | 0.5246132                        |                                  |
| 0.65844065                                                      | 1                                | 3487                             | "tags=33%, list=22%, signal=43%" |                                  |
| REACTOME_MITOCHONDRIAL_TRNA_AMINOACYLATION                      |                                  |                                  |                                  |                                  |
| REACTOME_MITOCHONDRIAL_TRNA_AMINOACYLATION                      |                                  |                                  |                                  | 18                               |
| 0.3924648                                                       | 0.9499798                        | 0.5331492                        | 0.67670494                       |                                  |
| 1                                                               | 1800                             | "tags=28%, list=11%, signal=31%" |                                  |                                  |
| REACTOME_REGULATION_OF_INSULIN_SECRETION                        |                                  |                                  |                                  |                                  |
| REACTOME_REGULATION_OF_INSULIN_SECRETION                        |                                  |                                  |                                  | 80                               |
| 0.3093804                                                       | 0.9483786                        | 0.5709459                        | 0.67753243                       |                                  |
| 1                                                               | 3741                             | "tags=31%, list=23%, signal=41%" |                                  |                                  |
| REACTOME_NEGATIVE_REGULATORS_OF_RIG_I_MDA5_SIGNALING            |                                  |                                  |                                  |                                  |
| REACTOME_NEGATIVE_REGULATORS_OF_RIG_I_MDA5_SIGNALING            |                                  |                                  |                                  |                                  |
| 24                                                              | 0.3742998                        | 0.94706905                       | 0.5561358                        |                                  |
| 0.67812914                                                      | 1                                | 3947                             | "tags=38%, list=25%, signal=50%" |                                  |
| REACTOME_LIPOPROTEIN_METABOLISM                                 |                                  |                                  |                                  | REACTOME_LIPOPROTEIN_METABOLISM  |
|                                                                 | 22                               | 0.37931678                       | 0.94561166                       | 0.54392767                       |
| 0.67891866                                                      | 1                                | 3738                             | "tags=27%, list=23%, signal=35%" |                                  |
| REACTOME_REGULATORY_RNA_PATHWAYS                                |                                  |                                  |                                  | REACTOME_REGULATORY_RNA_PATHWAYS |
|                                                                 | 20                               | 0.3853273                        | 0.94507325                       | 0.5572917                        |
| 0.6778869                                                       | 1                                | 4097                             | "tags=50%, list=25%, signal=67%" |                                  |
| REACTOME_G_PROTEIN_ACTIVATION                                   |                                  |                                  |                                  | REACTOME_G_PROTEIN_ACTIVATION    |
|                                                                 | 25                               | 0.370242                         | 0.93932855                       | 0.5716163                        |
| 0.68680036                                                      | 1                                | 2763                             | "tags=28%, list=17%, signal=34%" |                                  |
| REACTOME_NETRIN1_SIGNALING                                      |                                  |                                  |                                  | REACTOME_NETRIN1_SIGNALING       |
|                                                                 | 33                               | 0.34604663                       | 0.93743914                       | 0.56511056                       |
| 0.68826306                                                      | 1                                | 3917                             | "tags=27%, list=24%, signal=36%" |                                  |
| REACTOME_GROWTH_HORMONE_RECEPTOR_SIGNALING                      |                                  |                                  |                                  |                                  |
| REACTOME_GROWTH_HORMONE_RECEPTOR_SIGNALING                      |                                  |                                  |                                  | 20                               |
| 0.38019186                                                      | 0.93008614                       | 0.56568366                       | 0.6995211                        |                                  |
| 5035                                                            | "tags=55%, list=31%, signal=80%" |                                  |                                  |                                  |
| REACTOME_ACYL_CHAIN_REMODELLING_OF_PE                           |                                  |                                  |                                  |                                  |
| REACTOME_ACYL_CHAIN_REMODELLING_OF_PE                           |                                  |                                  |                                  | 20                               |
| 0.3824634                                                       | 0.92929184                       | 0.56901044                       | 0.6989235                        |                                  |
| 1                                                               | 1773                             | "tags=20%, list=11%, signal=22%" |                                  |                                  |
| REACTOME_FRS2_MEDIATED_CASCADE                                  |                                  |                                  |                                  | REACTOME_FRS2_MEDIATED_CASCADE   |
|                                                                 | 33                               | 0.34336466                       | 0.92478293                       | 0.60831237                       |
| 0.7053286                                                       | 1                                | 4666                             | "tags=30%, list=29%, signal=43%" |                                  |
| REACTOME_SMAD2_SMAD3_SMAD4_HETEROTRIMER_REGULATES_TRANSCRIPTION |                                  |                                  |                                  |                                  |



REACTOME\_SMAD2\_SMAD3\_SMAD4\_HETEROTRIMER\_REGULATES\_TRANSCRIPTION  
 21 0.37260628 0.9216183 0.59031415  
 0.70909363 1 3389 "tags=43%, list=21%, signal=54%"  
 REACTOME\_PHASE\_II\_CONJUGATION REACTOME\_PHASE\_II\_CONJUGATION  
 44 0.32906285 0.9212346 0.61660564  
 0.70773405 1 5243 "tags=39%, list=33%, signal=57%"  
 REACTOME\_SPHINGOLIPID\_DE\_NOVO\_BIOSYNTHESIS  
 REACTOME\_SPHINGOLIPID\_DE\_NOVO\_BIOSYNTHESIS 19  
 0.37807366 0.91877854 0.5953361 0.710276 1  
 5533 "tags=47%, list=34%, signal=72%"  
 REACTOME\_NCAM\_SIGNALING\_FOR\_NEURITE\_OUT\_GROWTH  
 REACTOME\_NCAM\_SIGNALING\_FOR\_NEURITE\_OUT\_GROWTH 51  
 0.3165836 0.9146666 0.61117715 0.7157686  
 1 2829 "tags=22%, list=18%, signal=26%"  
 REACTOME\_RIP\_MEDIATED\_NFKB\_ACTIVATION\_VIA\_DAI  
 REACTOME\_RIP\_MEDIATED\_NFKB\_ACTIVATION\_VIA\_DAI 17  
 0.38333574 0.90554047 0.6179625 0.7302101  
 1 1805 "tags=24%, list=11%, signal=26%"  
 REACTOME\_DESTABILIZATION\_OF\_MRNA\_BY\_BRF1  
 REACTOME\_DESTABILIZATION\_OF\_MRNA\_BY\_BRF1 15  
 0.39177057 0.90506816 0.614654 0.7288746 1  
 3487 "tags=33%, list=22%, signal=43%"  
 REACTOME\_CELL\_CELL\_COMMUNICATION REACTOME\_CELL\_CELL\_COMMUNICATION  
 98 0.28731665 0.89969385 0.6794311  
 0.7362808 1 3454 "tags=23%, list=21%, signal=30%"  
 REACTOME\_ION\_TRANSPORT\_BY\_P\_TYPE\_ATPASES  
 REACTOME\_ION\_TRANSPORT\_BY\_P\_TYPE\_ATPASES 28  
 0.34385026 0.89566666 0.62627554 0.7412477  
 1 2081 "tags=21%, list=13%, signal=25%"  
 REACTOME\_INTERFERON\_ALPHA\_BETA\_SIGNALING  
 REACTOME\_INTERFERON\_ALPHA\_BETA\_SIGNALING 45  
 0.31525612 0.8876015 0.6598311 0.75348085  
 1 3776 "tags=40%, list=23%, signal=52%"  
 REACTOME\_IMMUNOREGULATORY\_INTERACTIONS\_BETWEEN\_A\_LYMPHOID\_AND\_A\_NON\_  
 LYMPHOID\_CELL  
 REACTOME\_IMMUNOREGULATORY\_INTERACTIONS\_BETWEEN\_A\_LYMPHOID\_AND\_A\_NON\_  
 LYMPHOID\_CELL 38 0.32090333 0.8851272  
 0.64683545 0.7556571 1 4261 "tags=42%,  
 list=26%, signal=57%"  
 REACTOME\_NEUROTRANSMITTER\_RELEASE\_CYCLE  
 REACTOME\_NEUROTRANSMITTER\_RELEASE\_CYCLE 33  
 0.3308476 0.88227636 0.65473145 0.7583941  
 1 14 "tags=3%, list=0%, signal=3%"  
 REACTOME\_TRANSCRIPTIONAL\_REGULATION\_OF\_WHITE\_ADIPOCYTE\_DIFFERENTIATI  
 ON  
 REACTOME\_TRANSCRIPTIONAL\_REGULATION\_OF\_WHITE\_ADIPOCYTE\_DIFFERENTIATI  
 ON 62 0.2924625 0.8729698  
 0.6913146 0.772256 1 3225 "tags=24%, list=20%,  
 signal=30%"  
 REACTOME\_PTM\_GAMMA\_CARBOXYLATION\_HYPUSINE\_FORMATION\_AND\_ARYLSULFATAS  
 E\_ACTIVATION  
 REACTOME\_PTM\_GAMMA\_CARBOXYLATION\_HYPUSINE\_FORMATION\_AND\_ARYLSULFATAS  
 E\_ACTIVATION 21 0.35109916 0.86015105  
 0.6716016 0.79150736 1 1186 "tags=19%,

```

list=7%, signal=21%"
REACTOME_BASIGIN_INTERACTIONS      REACTOME_BASIGIN_INTERACTIONS
      22      0.33642042      0.84969556      0.68175584
0.8063928      1      3985      "tags=41%, list=25%, signal=54%"
REACTOME_ACTIVATION_OF_GENES_BY_ATF4
REACTOME_ACTIVATION_OF_GENES_BY_ATF4      19
0.34159008      0.8422937      0.70872486      0.8162125
1      5433      "tags=53%, list=34%, signal=79%"
REACTOME_RIG_I_MDA5_MEDIATED_INDUCTION_OF_IFN_ALPHA_BETA_PATHWAYS
REACTOME_RIG_I_MDA5_MEDIATED_INDUCTION_OF_IFN_ALPHA_BETA_PATHWAYS
      58      0.28638497      0.8354551      0.7361751
0.8249568      1      3270      "tags=26%, list=20%, signal=32%"
REACTOME_INHIBITION_OF_VOLTAGE_GATED_CA2_CHANNELS_VIA_GBETA_GAMMA_SU
BUNITS
REACTOME_INHIBITION_OF_VOLTAGE_GATED_CA2_CHANNELS_VIA_GBETA_GAMMA_SU
BUNITS      22      0.33302817      0.8295597
0.7168597      0.8319584      1      2763      "tags=23%,
list=17%, signal=27%"
REACTOME_PI_METABOLISM      REACTOME_PI_METABOLISM      40
0.2889518      0.8118715      0.77926826      0.85643053
1      4479      "tags=40%, list=28%, signal=55%"
REACTOME_GABA_B_RECEPTOR_ACTIVATION
REACTOME_GABA_B_RECEPTOR_ACTIVATION      33
0.29824442      0.80482125      0.75930524      0.8642466
1      2014      "tags=18%, list=13%, signal=21%"
REACTOME_CREB_PHOSPHORYLATION_THROUGH_THE_ACTIVATION_OF_CAMKII
REACTOME_CREB_PHOSPHORYLATION_THROUGH_THE_ACTIVATION_OF_CAMKII
      15      0.34690943      0.79947126      0.75137365
0.8696085      1      2829      "tags=27%, list=18%, signal=32%"
REACTOME_SIGNALING_BY_GPCR      REACTOME_SIGNALING_BY_GPCR
      496      0.23503175      0.79673827      0.966967
0.8711433      1      2992      "tags=17%, list=19%, signal=20%"
REACTOME_MYOGENESIS      REACTOME_MYOGENESIS      23
0.31608462      0.79618317      0.77380955      0.8694966
1      3051      "tags=22%, list=19%, signal=27%"
REACTOME_SIGNALING_BY_FGFR1_MUTANTS
REACTOME_SIGNALING_BY_FGFR1_MUTANTS      26
0.3035993      0.7928136      0.78210115      0.87184393
1      6876      "tags=54%, list=43%, signal=94%"
REACTOME_REGULATION_OF_GENE_EXPRESSION_IN_BETA_CELLS
REACTOME_REGULATION_OF_GENE_EXPRESSION_IN_BETA_CELLS
      18      0.32683465      0.7886911      0.7480315
0.87529975      1      3475      "tags=22%, list=22%, signal=28%"
REACTOME_REGULATION_OF_INSULIN_SECRETION_BY_GLUCAGON_LIKE_PEPTIDE1
REACTOME_REGULATION_OF_INSULIN_SECRETION_BY_GLUCAGON_LIKE_PEPTIDE1
      37      0.28737226      0.7884001      0.79551125
0.87325954      1      2763      "tags=27%, list=17%, signal=33%"
REACTOME_SHC_MEDIATED_CASCADE      REACTOME_SHC_MEDIATED_CASCADE
      26      0.3032395      0.7789972      0.7911803
0.8838116      1      1958      "tags=12%, list=12%, signal=13%"
REACTOME_TRANSCRIPTIONAL_ACTIVITY_OF_SMAD2_SMAD3_SMAD4_HETEROTRIMER
REACTOME_TRANSCRIPTIONAL_ACTIVITY_OF_SMAD2_SMAD3_SMAD4_HETEROTRIMER
      29      0.29475316      0.7788836      0.7989556
0.8815507      1      3389      "tags=34%, list=21%, signal=44%"

```

|                                                                      |                                                                      |                                       |
|----------------------------------------------------------------------|----------------------------------------------------------------------|---------------------------------------|
| REACTOME_NEURONAL_SYSTEM                                             | REACTOME_NEURONAL_SYSTEM                                             | 243                                   |
| 0.23390295                                                           | 0.7780947                                                            | 0.92740285 0.8802297                  |
| 1                                                                    | 2909                                                                 | "tags=16%, list=18%, signal=19%"      |
| REACTOME_Glutathione_Conjugation                                     | REACTOME_Glutathione_Conjugation                                     |                                       |
| 21                                                                   | 0.31055108                                                           | 0.77331996 0.7629139                  |
| 0.8843205                                                            | 1                                                                    | 4258 "tags=43%, list=26%, signal=58%" |
| REACTOME_Acyl_Chain_Remodelling_of_PC                                | REACTOME_Acyl_Chain_Remodelling_of_PC                                | 20                                    |
| 0.3193281                                                            | 0.77125436                                                           | 0.79360855 0.8845448                  |
| 1                                                                    | 1773                                                                 | "tags=15%, list=11%, signal=17%"      |
| REACTOME_Ion_Channel_Transport                                       | REACTOME_Ion_Channel_Transport                                       |                                       |
| 46                                                                   | 0.26774627                                                           | 0.7548999 0.8424821                   |
| 0.9026321                                                            | 1                                                                    | 2081 "tags=13%, list=13%, signal=15%" |
| REACTOME_Circadian_Repression_of_Expression_by_Rev_Erba              | REACTOME_Circadian_Repression_of_Expression_by_Rev_Erba              |                                       |
| 21                                                                   | 0.30232504                                                           | 0.74939084 0.8337731                  |
| 0.9067431                                                            | 1                                                                    | 4336 "tags=38%, list=27%, signal=52%" |
| REACTOME_Signaling_by_FGFR_Mutants                                   | REACTOME_Signaling_by_FGFR_Mutants                                   | 39                                    |
| 0.26977748                                                           | 0.74206233                                                           | 0.8626506 0.91293716                  |
| 1                                                                    | 6876                                                                 | "tags=51%, list=43%, signal=89%"      |
| REACTOME_Yap1_and_Wwtr1_Taz_Stimulated_Gene_Expression               | REACTOME_Yap1_and_Wwtr1_Taz_Stimulated_Gene_Expression               |                                       |
| 22                                                                   | 0.2998875                                                            | 0.7358706 0.8599476                   |
| 0.9178227                                                            | 1                                                                    | 6114 "tags=45%, list=38%, signal=73%" |
| REACTOME_Rora_Activates_Circadian_Expression                         | REACTOME_Rora_Activates_Circadian_Expression                         | 22                                    |
| 0.29237083                                                           | 0.72619385                                                           | 0.8326586 0.92630196                  |
| 1                                                                    | 4336                                                                 | "tags=36%, list=27%, signal=50%"      |
| REACTOME_Steroid_Hormones                                            | REACTOME_Steroid_Hormones                                            | 26                                    |
| 0.27913076                                                           | 0.7251906                                                            | 0.8565841 0.92500573                  |
| 1                                                                    | 1272                                                                 | "tags=12%, list=8%, signal=13%"       |
| REACTOME_G_Beta_Gamma_Signalling_Through_Plc_Beta                    | REACTOME_G_Beta_Gamma_Signalling_Through_Plc_Beta                    | 19                                    |
| 0.29685807                                                           | 0.7239235                                                            | 0.8379814 0.9238416                   |
| 1                                                                    | 2763                                                                 | "tags=26%, list=17%, signal=32%"      |
| REACTOME_Regulation_of_IFNA_Signaling                                | REACTOME_Regulation_of_IFNA_Signaling                                | 19                                    |
| 0.29616362                                                           | 0.7205028                                                            | 0.8426667 0.9250849                   |
| 1                                                                    | 4272                                                                 | "tags=32%, list=27%, signal=43%"      |
| REACTOME_GABA_Receptor_Activation                                    | REACTOME_GABA_Receptor_Activation                                    |                                       |
| 45                                                                   | 0.25154182                                                           | 0.70793205 0.90311                    |
| 0.9350785                                                            | 1                                                                    | 2014 "tags=13%, list=13%, signal=15%" |
| REACTOME_Metabolism_of_Steroid_Hormones_and_Vitamins_A_and_D         | REACTOME_Metabolism_of_Steroid_Hormones_and_Vitamins_A_and_D         |                                       |
| 32                                                                   | 0.26271537                                                           | 0.70653045 0.8852868                  |
| 0.9339455                                                            | 1                                                                    | 2354 "tags=16%, list=15%, signal=18%" |
| REACTOME_Inhibition_of_Insulin_Secretion_by_Adrenaline_Noradrenaline | REACTOME_Inhibition_of_Insulin_Secretion_by_Adrenaline_Noradrenaline |                                       |
| 23                                                                   | 0.28021055                                                           | 0.705044 0.8558201                    |
| 0.9329754                                                            | 1                                                                    | 2014 "tags=22%, list=13%, signal=25%" |
| REACTOME_Traf6_Mediated_IRF7_Activation                              | REACTOME_Traf6_Mediated_IRF7_Activation                              | 23                                    |

0.27642128      0.69903994      0.85064936      0.93617606  
1      3221      "tags=30%, list=20%, signal=38%"  
REACTOME\_CELL\_JUNCTION\_ORGANIZATION  
REACTOME\_CELL\_JUNCTION\_ORGANIZATION      65  
0.23175707      0.69037074      0.9266589      0.9416039  
1      3680      "tags=20%, list=23%, signal=26%"  
REACTOME\_BIOLOGICAL\_OXIDATIONS      REACTOME\_BIOLOGICAL\_OXIDATIONS  
84      0.2209486      0.6837002      0.9609811  
0.9449094      1      5003      "tags=29%, list=31%, signal=41%"  
REACTOME\_SYNTHESIS\_OF\_BILE\_ACIDS\_AND\_BILE\_SALTS  
REACTOME\_SYNTHESIS\_OF\_BILE\_ACIDS\_AND\_BILE\_SALTS      18  
0.27103505      0.6612517      0.8800558      0.9604295  
1      3433      "tags=22%, list=21%, signal=28%"  
REACTOME\_TAK1\_ACTIVATES\_NFKB\_BY\_PHOSPHORYLATION\_AND\_ACTIVATION\_OF\_IK  
KS\_COMPLEX  
REACTOME\_TAK1\_ACTIVATES\_NFKB\_BY\_PHOSPHORYLATION\_AND\_ACTIVATION\_OF\_IK  
KS\_COMPLEX      19      0.2753058      0.65421236  
0.9092123      0.9629734      1      1805      "tags=16%,  
list=11%, signal=18%"  
REACTOME\_GASTRIN\_CREB\_SIGNALLING\_PATHWAY\_VIA\_PKC\_AND\_MAPK  
REACTOME\_GASTRIN\_CREB\_SIGNALLING\_PATHWAY\_VIA\_PKC\_AND\_MAPK  
172      0.19884135      0.6470578      0.9907407  
0.9651953      1      5481      "tags=34%, list=34%, signal=51%"  
REACTOME\_ACYL\_CHAIN\_REMODELLING\_OF\_PG  
REACTOME\_ACYL\_CHAIN\_REMODELLING\_OF\_PG      15  
0.2709748      0.62259144      0.9212707      0.977045 1  
6357      "tags=47%, list=39%, signal=77%"  
REACTOME\_AMINE\_LIGAND\_BINDING\_RECEPTORS  
REACTOME\_AMINE\_LIGAND\_BINDING\_RECEPTORS      34  
0.23039414      0.618259      0.94199246      0.9766749      1  
5919      "tags=44%, list=37%, signal=70%"  
REACTOME\_TRANSPORT\_OF\_GLUCOSE\_AND\_OTHER\_SUGARS\_BILE\_SALTS\_AND\_ORGANI  
C\_ACIDS\_METAL\_IONS\_AND\_AMINE\_COMPOUNDS  
REACTOME\_TRANSPORT\_OF\_GLUCOSE\_AND\_OTHER\_SUGARS\_BILE\_SALTS\_AND\_ORGANI  
C\_ACIDS\_METAL\_IONS\_AND\_AMINE\_COMPOUNDS      77  
0.19574025      0.5972136      0.9889625      0.9839573  
1      4769      "tags=23%, list=30%, signal=33%"  
REACTOME\_AMINO\_ACID\_TRANSPORT\_ACROSS\_THE\_PLASMA\_MEMBRANE  
REACTOME\_AMINO\_ACID\_TRANSPORT\_ACROSS\_THE\_PLASMA\_MEMBRANE  
27      0.21992444      0.5768872      0.9670051  
0.9891975      1      6400      "tags=52%, list=40%, signal=86%"  
REACTOME\_ADHERENS\_JUNCTIONS\_INTERACTIONS  
REACTOME\_ADHERENS\_JUNCTIONS\_INTERACTIONS      22  
0.22494422      0.55687165      0.96925133      0.9928596  
1      451      "tags=5%, list=3%, signal=5%"  
REACTOME\_SYNTHESIS\_OF\_PIPS\_AT\_THE\_PLASMA\_MEMBRANE  
REACTOME\_SYNTHESIS\_OF\_PIPS\_AT\_THE\_PLASMA\_MEMBRANE      26  
0.21720828      0.55668706      0.97800773      0.9903575  
1      2876      "tags=23%, list=18%, signal=28%"  
REACTOME\_AMINO\_ACID\_AND\_OLIGOPEPTIDE\_SLC\_TRANSPORTERS  
REACTOME\_AMINO\_ACID\_AND\_OLIGOPEPTIDE\_SLC\_TRANSPORTERS  
45      0.18233047      0.51824576      0.9963592  
0.99573106      1      6754      "tags=47%, list=42%, signal=80%"  
REACTOME\_BILE\_ACID\_AND\_BILE\_SALT\_METABOLISM

|                                             |                                   |            |                                  |    |
|---------------------------------------------|-----------------------------------|------------|----------------------------------|----|
| REACTOME_BILE_ACID_AND_BILE_SALT_METABOLISM |                                   |            |                                  | 23 |
| 0.19808148                                  | 0.504981                          | 0.9894459  | 0.9951909                        | 1  |
| 6300                                        | "tags=43%, list=39%, signal=71%"  |            |                                  |    |
| REACTOME_GAP_JUNCTION_TRAFFICKING           | REACTOME_GAP_JUNCTION_TRAFFICKING |            |                                  |    |
| 21                                          | 0.19025835                        | 0.47218207 | 0.992053                         |    |
| 0.9962331                                   | 1                                 | 6616       | "tags=48%, list=41%, signal=81%" |    |
