# Supplementary material for: Inflation vs. Exhaustion of Antiviral CD8+ T-Cell Populations in Persistent Infections: Two Sides of the Same Coin?
Source: PubMed Central journal article supplement (PMC6414785; doi:10.3389/fimmu.2019.00197), 2019-03-06
Supplement: Table_5.pdf [file Table_5.pdf]

Table S5A

| NAME                                                     | GS<br>NES                        | follow link to MSigDB<br>NOM p-val | GS DETAILS<br>FDR q-val           | SIZE<br>FWER p-val |
|----------------------------------------------------------|----------------------------------|------------------------------------|-----------------------------------|--------------------|
| RANK AT MAX                                              | LEADING EDGE                     |                                    |                                   |                    |
| GSE14415_TCONV_VS_FOXP3_KO_INDUCED_TREG_DN               |                                  |                                    |                                   |                    |
| GSE14415_TCONV_VS_FOXP3_KO_INDUCED_TREG_DN               |                                  |                                    | Details ...                       | 152                |
| 0.8512679                                                | 3.5359576                        | 0                                  | 0                                 | 0                  |
| 1397                                                     | "tags=76%, list=10%, signal=84%" |                                    |                                   |                    |
| GSE13547_CTRL_VS_ANTI_IGM_STIM_BCELL_12H_UP              |                                  |                                    |                                   |                    |
| GSE13547_CTRL_VS_ANTI_IGM_STIM_BCELL_12H_UP              |                                  |                                    | Details ...                       |                    |
| 145                                                      | 0.8570669                        | 3.5275145                          | 0                                 | 0                  |
| 808                                                      | "tags=69%, list=6%, signal=72%"  |                                    |                                   |                    |
| GSE15750_DAY6_VS_DAY10_TRAF6KO_EFF_CD8_TCELL_UP          |                                  |                                    |                                   |                    |
| GSE15750_DAY6_VS_DAY10_TRAF6KO_EFF_CD8_TCELL_UP          |                                  |                                    | Details ...                       |                    |
| 143                                                      | 0.84650564                       | 3.5108736                          | 0                                 | 0                  |
| 870                                                      | "tags=64%, list=6%, signal=68%"  |                                    |                                   |                    |
| GSE15750_DAY6_VS_DAY10_EFF_CD8_TCELL_UP                  |                                  |                                    |                                   |                    |
| GSE15750_DAY6_VS_DAY10_EFF_CD8_TCELL_UP                  |                                  |                                    | Details ...                       | 144                |
| 0.8506729                                                | 3.5057540                        | 0                                  | 0                                 |                    |
| 1305                                                     | "tags=72%, list=9%, signal=78%"  |                                    |                                   |                    |
| GSE14415_INDUCED_VS_NATURAL_TREG_DN                      |                                  |                                    |                                   |                    |
| GSE14415_INDUCED_VS_NATURAL_TREG_DN                      |                                  |                                    | Details ...                       | 151                |
| 0.85111314                                               | 3.5001361                        | 0                                  | 0                                 | 0                  |
| 1085                                                     | "tags=70%, list=8%, signal=75%"  |                                    |                                   |                    |
| GSE14415_INDUCED_TREG_VS_TCONV_UP                        |                                  |                                    | GSE14415_INDUCED_TREG_VS_TCONV_UP |                    |
| Details ...                                              | 139                              | 0.8412118                          | 3.4431365                         | 0                  |
| 0                                                        | 0                                | 1680                               | "tags=81%, list=12%, signal=91%"  |                    |
| GSE14415_NATURAL_TREG_VS_TCONV_DN                        |                                  |                                    | GSE14415_NATURAL_TREG_VS_TCONV_DN |                    |
| Details ...                                              | 145                              | 0.83156735                         | 3.4202006                         | 0                  |
| 0                                                        | 0                                | 1098                               | "tags=65%, list=8%, signal=70%"   |                    |
| GSE13547_CTRL_VS_ANTI_IGM_STIM_ZFX_KO_BCELL_2H_UP        |                                  |                                    |                                   |                    |
| GSE13547_CTRL_VS_ANTI_IGM_STIM_ZFX_KO_BCELL_2H_UP        |                                  |                                    | Details ...                       |                    |
| 133                                                      | 0.8219061                        | 3.4070930                          | 0                                 | 0                  |
| 1587                                                     | "tags=76%, list=11%, signal=85%" |                                    |                                   |                    |
| GSE33162_UNTREATED_VS_4H_LPS_STIM_HDAC3_KO_MACROPHAGE_DN |                                  |                                    |                                   |                    |
| GSE33162_UNTREATED_VS_4H_LPS_STIM_HDAC3_KO_MACROPHAGE_DN |                                  |                                    |                                   |                    |
| Details ...                                              | 159                              | 0.8052403                          | 3.3500930                         | 0                  |
| 0                                                        | 1703                             | "tags=70%, list=12%, signal=79%"   |                                   |                    |
| GSE11386_NAIVE_VS_MEMORY_BCELL_UP                        |                                  |                                    | GSE11386_NAIVE_VS_MEMORY_BCELL_UP |                    |
| Details ...                                              | 153                              | 0.7917242                          | 3.3050165                         | 0                  |
| 0                                                        | 0                                | 2003                               | "tags=71%, list=14%, signal=82%"  |                    |
| GSE13547_2H_VS_12_H_ANTI_IGM_STIM_BCELL_DN               |                                  |                                    |                                   |                    |
| GSE13547_2H_VS_12_H_ANTI_IGM_STIM_BCELL_DN               |                                  |                                    | Details ...                       | 143                |
| 0.8038657                                                | 3.3014963                        | 0                                  | 0                                 | 0                  |
| 1439                                                     | "tags=67%, list=10%, signal=74%" |                                    |                                   |                    |
| GOLDRATH_EFF_VS_MEMORY_CD8_TCELL_UP                      |                                  |                                    |                                   |                    |
| GOLDRATH_EFF_VS_MEMORY_CD8_TCELL_UP                      |                                  |                                    | Details ...                       | 158                |
| 0.7837205                                                | 3.2980487                        | 0                                  | 0                                 | 0                  |
| 1277                                                     | "tags=66%, list=9%, signal=72%"  |                                    |                                   |                    |
| GSE27241_WT_VS_RORGT_KO_TH17_POLARIZED_CD4_TCELL_UP      |                                  |                                    |                                   |                    |
| GSE27241_WT_VS_RORGT_KO_TH17_POLARIZED_CD4_TCELL_UP      |                                  |                                    |                                   |                    |
| Details ...                                              | 130                              | 0.813163                           | 3.2881105                         | 0                  |
| 0                                                        | 840                              | "tags=54%, list=6%, signal=57%"    |                                   |                    |
| KAECH_DAY8_EFF_VS_MEMORY_CD8_TCELL_UP                    |                                  |                                    |                                   |                    |

|                                                           |                                       |     |
|-----------------------------------------------------------|---------------------------------------|-----|
| KAECH_DAY8_EFF_VS_MEMORY_CD8_TCELL_UP                     | Details ...                           | 151 |
| 0.77719486                                                | 3.2687707 0 0 0                       |     |
| 1732                                                      | "tags=69%, list=12%, signal=78%"      |     |
| GSE36476_CTRL_VS_TSST_ACT_72H_MEMORY_CD4_TCELL_YOUNG_DN   |                                       |     |
| GSE36476_CTRL_VS_TSST_ACT_72H_MEMORY_CD4_TCELL_YOUNG_DN   |                                       |     |
| Details ...                                               | 147 0.7711256 3.251116 0              | 0   |
| 0                                                         | 1321 "tags=55%, list=9%, signal=60%"  |     |
| KAECH_DAY8_EFF_VS_DAY15_EFF_CD8_TCELL_UP                  |                                       |     |
| KAECH_DAY8_EFF_VS_DAY15_EFF_CD8_TCELL_UP                  | Details ...                           | 154 |
| 0.78424054                                                | 3.2422447 0 0 0                       |     |
| 2110                                                      | "tags=71%, list=15%, signal=82%"      |     |
| GSE36476_CTRL_VS_TSST_ACT_72H_MEMORY_CD4_TCELL_OLD_DN     |                                       |     |
| GSE36476_CTRL_VS_TSST_ACT_72H_MEMORY_CD4_TCELL_OLD_DN     |                                       |     |
| Details ...                                               | 142 0.7718059 3.192243 0              | 0   |
| 0                                                         | 1299 "tags=55%, list=9%, signal=60%"  |     |
| GSE30962_PRIMARY_VS_SECONDARY_ACUTE_LCMV_INF_CD8_TCELL_UP |                                       |     |
| GSE30962_PRIMARY_VS_SECONDARY_ACUTE_LCMV_INF_CD8_TCELL_UP |                                       |     |
| Details ...                                               | 147 0.7653149 3.1840854               | 0   |
| 0                                                         | 0 773 "tags=51%, list=5%, signal=53%" |     |
| KAECH_NAIVE_VS_DAY8_EFF_CD8_TCELL_DN                      |                                       |     |
| KAECH_NAIVE_VS_DAY8_EFF_CD8_TCELL_DN                      | Details ...                           | 158 |
| 0.7613454                                                 | 3.1713278 0 0 0                       |     |
| 1701                                                      | "tags=66%, list=12%, signal=75%"      |     |
| GSE15930_NAIVE_VS_48H_IN_VITRO_STIM_CD8_TCELL_DN          |                                       |     |
| GSE15930_NAIVE_VS_48H_IN_VITRO_STIM_CD8_TCELL_DN          | Details ...                           |     |
| 167                                                       | 0.74816865 3.1370368 0 0              | 0   |
| 2115                                                      | "tags=63%, list=15%, signal=73%"      |     |
| GSE19941_LPS_VS_LPS_AND_IL10_STIM_IL10_KO_MACROPHAGE_UP   |                                       |     |
| GSE19941_LPS_VS_LPS_AND_IL10_STIM_IL10_KO_MACROPHAGE_UP   |                                       |     |
| 143                                                       | 0.75656354 3.1358154 0 0              | 0   |
| 2154                                                      | "tags=67%, list=15%, signal=78%"      |     |
| GSE13547_2H_VS_12_H_ANTI_IGM_STIM_ZFX_KO_BCELL_DN         |                                       |     |
| GSE13547_2H_VS_12_H_ANTI_IGM_STIM_ZFX_KO_BCELL_DN         |                                       | 131 |
| 0.78582615                                                | 3.135025 0 0 0                        |     |
| 1633                                                      | "tags=66%, list=12%, signal=74%"      |     |
| GSE10239_NAIVE_VS_DAY4.5_EFF_CD8_TCELL_DN                 |                                       |     |
| GSE10239_NAIVE_VS_DAY4.5_EFF_CD8_TCELL_DN                 |                                       | 144 |
| 0.75621414                                                | 3.134018 0 0 0                        |     |
| 1425                                                      | "tags=59%, list=10%, signal=65%"      |     |
| GSE13547_WT_VS_ZFX_KO_BCELL_ANTI_IGM_STIM_2H_UP           |                                       |     |
| GSE13547_WT_VS_ZFX_KO_BCELL_ANTI_IGM_STIM_2H_UP           |                                       | 140 |
| 0.76360744                                                | 3.1273365 0 0 0                       |     |
| 1819                                                      | "tags=64%, list=13%, signal=73%"      |     |
| GOLDRATH_NAIVE_VS_EFF_CD8_TCELL_DN                        |                                       |     |
| GOLDRATH_NAIVE_VS_EFF_CD8_TCELL_DN                        |                                       | 154 |
| 0.74207205                                                | 3.1188004 0 0 0                       |     |
| 1321                                                      | "tags=60%, list=9%, signal=66%"       |     |
| GSE39556_CD8A_DC_VS_NK_CELL_MOUSE_3H_POST_POLYIC_INJ_UP   |                                       |     |
| GSE39556_CD8A_DC_VS_NK_CELL_MOUSE_3H_POST_POLYIC_INJ_UP   |                                       |     |
| 158                                                       | 0.7508221 3.1139772 0 0               | 0   |
| 1270                                                      | "tags=56%, list=9%, signal=61%"       |     |
| GSE24634_TEFF_VS_TCONV_DAY7_IN_CULTURE_UP                 |                                       |     |
| GSE24634_TEFF_VS_TCONV_DAY7_IN_CULTURE_UP                 |                                       | 158 |
| 0.75740373                                                | 3.1012747 0 0 0                       |     |

|                                                            |                                  |           |   |   |     |
|------------------------------------------------------------|----------------------------------|-----------|---|---|-----|
| 1273                                                       | "tags=53%, list=9%, signal=57%"  |           |   |   |     |
| GSE24634_TREG_VS_TCONV_POST_DAY7_IL4_CONVERSION_UP         |                                  |           |   |   |     |
| GSE24634_TREG_VS_TCONV_POST_DAY7_IL4_CONVERSION_UP         |                                  |           |   |   | 158 |
| 0.7399121                                                  | 3.0886056                        | 0         | 0 | 0 |     |
| 1306                                                       | "tags=51%, list=9%, signal=56%"  |           |   |   |     |
| GSE36476_CTRL_VS_TSST_ACT_40H_MEMORY_CD4_TCELL_OLD_DN      |                                  |           |   |   |     |
| GSE36476_CTRL_VS_TSST_ACT_40H_MEMORY_CD4_TCELL_OLD_DN      |                                  |           |   |   |     |
| 152                                                        | 0.7380422                        | 3.0856833 | 0 | 0 | 0   |
| 1299                                                       | "tags=52%, list=9%, signal=57%"  |           |   |   |     |
| GSE33162_UNTREATED_VS_4H_LPS_STIM_HDAC3_KO_MACROPHAGE_UP   |                                  |           |   |   |     |
| GSE33162_UNTREATED_VS_4H_LPS_STIM_HDAC3_KO_MACROPHAGE_UP   |                                  |           |   |   |     |
| 157                                                        | 0.73611486                       | 3.0789392 | 0 | 0 | 0   |
| 1948                                                       | "tags=68%, list=14%, signal=78%" |           |   |   |     |
| GSE9650_EFFECTOR_VS_MEMORY_CD8_TCELL_UP                    |                                  |           |   |   |     |
| GSE9650_EFFECTOR_VS_MEMORY_CD8_TCELL_UP                    |                                  |           |   |   | 159 |
| 0.73577434                                                 | 3.0645502                        | 0         | 0 | 0 |     |
| 2223                                                       | "tags=65%, list=16%, signal=77%" |           |   |   |     |
| GSE36476_CTRL_VS_TSST_ACT_40H_MEMORY_CD4_TCELL_YOUNG_DN    |                                  |           |   |   |     |
| GSE36476_CTRL_VS_TSST_ACT_40H_MEMORY_CD4_TCELL_YOUNG_DN    |                                  |           |   |   |     |
| 146                                                        | 0.7446198                        | 3.0636780 | 0 | 0 |     |
| 1270                                                       | "tags=53%, list=9%, signal=57%"  |           |   |   |     |
| GSE21063_WT_VS_NFATC1_KO_8H_ANTI_IGM_STIM_BCELL_UP         |                                  |           |   |   |     |
| GSE21063_WT_VS_NFATC1_KO_8H_ANTI_IGM_STIM_BCELL_UP         |                                  |           |   |   | 138 |
| 0.7326221                                                  | 3.0585988                        | 0         | 0 | 0 |     |
| 1418                                                       | "tags=56%, list=10%, signal=61%" |           |   |   |     |
| GSE5679_CTRL_VS_PPARG_LIGAND_ROSIGLITAZONE_TREATED_DC_UP   |                                  |           |   |   |     |
| GSE5679_CTRL_VS_PPARG_LIGAND_ROSIGLITAZONE_TREATED_DC_UP   |                                  |           |   |   |     |
| 157                                                        | 0.72627586                       | 3.0537740 | 0 | 0 |     |
| 1935                                                       | "tags=61%, list=14%, signal=70%" |           |   |   |     |
| GSE7568_IL4_VS_IL4_AND_DEXAMETHASONE_TREATED_MACROPHAGE_UP |                                  |           |   |   |     |
| GSE7568_IL4_VS_IL4_AND_DEXAMETHASONE_TREATED_MACROPHAGE_UP |                                  |           |   |   |     |
| 131                                                        | 0.75964916                       | 3.0456810 | 0 | 0 |     |
| 2154                                                       | "tags=73%, list=15%, signal=85%" |           |   |   |     |
| GSE18893_TCONV_VS_TREG_24H_TNF_STIM_UP                     |                                  |           |   |   |     |
| GSE18893_TCONV_VS_TREG_24H_TNF_STIM_UP                     |                                  |           |   |   | 145 |
| 0.73635024                                                 | 3.0437188                        | 0         | 0 | 0 |     |
| 1939                                                       | "tags=61%, list=14%, signal=70%" |           |   |   |     |
| GSE10239_NAIVE_VS_KLRG1HIGH_EFF_CD8_TCELL_DN               |                                  |           |   |   |     |
| GSE10239_NAIVE_VS_KLRG1HIGH_EFF_CD8_TCELL_DN               |                                  |           |   |   | 143 |
| 0.74177957                                                 | 3.0405846                        | 0         | 0 | 0 |     |
| 1269                                                       | "tags=49%, list=9%, signal=53%"  |           |   |   |     |
| GSE14415_INDUCED_TREG_VS_FAILED_INDUCED_TREG_UP            |                                  |           |   |   |     |
| GSE14415_INDUCED_TREG_VS_FAILED_INDUCED_TREG_UP            |                                  |           |   |   | 146 |
| 0.7289072                                                  | 3.0375040                        | 0         | 0 | 0 |     |
| 1973                                                       | "tags=58%, list=14%, signal=67%" |           |   |   |     |
| GSE5679_CTRL_VS_RARA_AGONIST_AM580_TREATED_DC_UP           |                                  |           |   |   |     |
| GSE5679_CTRL_VS_RARA_AGONIST_AM580_TREATED_DC_UP           |                                  |           |   |   | 142 |
| 0.7266131                                                  | 3.0057685                        | 0         | 0 | 0 |     |
| 1677                                                       | "tags=57%, list=12%, signal=64%" |           |   |   |     |
| GSE39110_DAY3_VS_DAY6_POST_IMMUNIZATION_CD8_TCELL_DN       |                                  |           |   |   |     |
| GSE39110_DAY3_VS_DAY6_POST_IMMUNIZATION_CD8_TCELL_DN       |                                  |           |   |   |     |
| 147                                                        | 0.7231883                        | 2.9937875 | 0 | 0 | 0   |
| 1256                                                       | "tags=56%, list=9%, signal=61%"  |           |   |   |     |
| GSE2405_S_AUREUS_VS_UNTREATED_NEUTROPHIL_DN                |                                  |           |   |   |     |

|                                                              |                                  |                                  |   |      |          |
|--------------------------------------------------------------|----------------------------------|----------------------------------|---|------|----------|
| GSE2405_S_AUREUS_VS_UNTREATED_NEUTROPHIL_DN                  |                                  |                                  |   |      | 150      |
| 0.714343                                                     | 2.9510558                        | 0                                | 0 | 0    |          |
| 992                                                          | "tags=41%, list=7%, signal=43%"  |                                  |   |      |          |
| GSE37532_WT_VS_PPARG_KO_VISCERAL_ADIPOSE_TISSUE_TREG_UP      |                                  |                                  |   |      |          |
| GSE37532_WT_VS_PPARG_KO_VISCERAL_ADIPOSE_TISSUE_TREG_UP      |                                  |                                  |   |      |          |
| 141                                                          | 0.71816593                       | 2.9393973                        | 0 | 0    | 0        |
| 1241                                                         | "tags=46%, list=9%, signal=50%"  |                                  |   |      |          |
| GSE24574_BCL6_LOW_TFH_VS_TCONV_CD4_TCELL_DN                  |                                  |                                  |   |      |          |
| GSE24574_BCL6_LOW_TFH_VS_TCONV_CD4_TCELL_DN                  |                                  |                                  |   |      | 151      |
| 0.7147146                                                    | 2.9319491                        | 0                                | 0 | 0    |          |
| 1940                                                         | "tags=56%, list=14%, signal=65%" |                                  |   |      |          |
| GSE35543_IN_VITRO_ITREG_VS_CONVERTED_EX_ITREG_UP             |                                  |                                  |   |      |          |
| GSE35543_IN_VITRO_ITREG_VS_CONVERTED_EX_ITREG_UP             |                                  |                                  |   |      | 143      |
| 0.7019634                                                    | 2.9309633                        | 0                                | 0 | 0    |          |
| 1947                                                         | "tags=53%, list=14%, signal=61%" |                                  |   |      |          |
| GSE23568_CTRL_VS_ID3_TRANSDUCED_CD8_TCELL_DN                 |                                  |                                  |   |      |          |
| GSE23568_CTRL_VS_ID3_TRANSDUCED_CD8_TCELL_DN                 |                                  |                                  |   |      | 143      |
| 0.71250176                                                   | 2.9301596                        | 0                                | 0 | 0    |          |
| 1811                                                         | "tags=57%, list=13%, signal=64%" |                                  |   |      |          |
| GSE15930_NAIVE_VS_48H_IN_VITRO_STIM_IL12_CD8_TCELL_DN        |                                  |                                  |   |      |          |
| GSE15930_NAIVE_VS_48H_IN_VITRO_STIM_IL12_CD8_TCELL_DN        |                                  |                                  |   |      |          |
| 153                                                          | 0.70310175                       | 2.9180515                        | 0 | 0    | 0        |
| 2114                                                         | "tags=56%, list=15%, signal=65%" |                                  |   |      |          |
| GSE26156_DOUBLE_POSITIVE_VS_CD4_SINGLE_POSITIVE_THYMOCYTE_DN |                                  |                                  |   |      |          |
| GSE26156_DOUBLE_POSITIVE_VS_CD4_SINGLE_POSITIVE_THYMOCYTE_DN |                                  |                                  |   |      |          |
| 165                                                          | 0.6959177                        | 2.908654                         | 0 | 0    | 0        |
| 2018                                                         | "tags=57%, list=14%, signal=66%" |                                  |   |      |          |
| GSE28726_NAIVE_VS_ACTIVATED_CD4_TCELL_DN                     |                                  |                                  |   |      |          |
| GSE28726_NAIVE_VS_ACTIVATED_CD4_TCELL_DN                     |                                  |                                  |   |      | 156      |
| 0.6989041                                                    | 2.9029412                        | 0                                | 0 | 0    |          |
| 1309                                                         | "tags=49%, list=9%, signal=53%"  |                                  |   |      |          |
| GSE40274_CTRL_VS_FOXP3_TRANSDUCED_ACTIVATED_CD4_TCELL_UP     |                                  |                                  |   |      |          |
| GSE40274_CTRL_VS_FOXP3_TRANSDUCED_ACTIVATED_CD4_TCELL_UP     |                                  |                                  |   |      |          |
| 143                                                          | 0.70318794                       | 2.9018831                        | 0 | 0    | 0        |
| 843                                                          | "tags=46%, list=6%, signal=49%"  |                                  |   |      |          |
| GSE33292_WT_VS_TCF1_KO_DN3_THYMOCYTE_DN                      |                                  |                                  |   |      |          |
| GSE33292_WT_VS_TCF1_KO_DN3_THYMOCYTE_DN                      |                                  |                                  |   |      | 157      |
| 0.69059426                                                   | 2.8903832                        | 0                                | 0 | 0    |          |
| 1270                                                         | "tags=47%, list=9%, signal=51%"  |                                  |   |      |          |
| GSE2128_C57BL6_VS_NOD_THYMOCYTE_UP                           |                                  |                                  |   |      |          |
| GSE2128_C57BL6_VS_NOD_THYMOCYTE_UP                           |                                  |                                  |   |      | 154      |
| 0.6925558                                                    | 2.8820584                        | 0                                | 0 | 0    |          |
| 1763                                                         | "tags=51%, list=12%, signal=57%" |                                  |   |      |          |
| GSE23568_ID3_KO_VS_WT_CD8_TCELL_UP                           |                                  |                                  |   |      |          |
| GSE23568_ID3_KO_VS_WT_CD8_TCELL_UP                           |                                  |                                  |   |      | 158      |
| 2.8684742                                                    | 0                                | 0                                | 0 | 1775 | 0.680959 |
|                                                              | "tags=54%, list=13%, signal=62%" |                                  |   |      |          |
| GSE9650_NAIVE_VS_EFF_CD8_TCELL_DN                            |                                  |                                  |   |      |          |
| GSE9650_NAIVE_VS_EFF_CD8_TCELL_DN                            |                                  |                                  |   |      |          |
| 157                                                          | 0.68651515                       | 2.8648112                        | 0 | 0    |          |
| 0                                                            | 1665                             | "tags=57%, list=12%, signal=64%" |   |      |          |
| GSE24634_IL4_VS_CTRL_TREATED_NAIVE_CD4_TCELL_DAY7_UP         |                                  |                                  |   |      |          |
| GSE24634_IL4_VS_CTRL_TREATED_NAIVE_CD4_TCELL_DAY7_UP         |                                  |                                  |   |      |          |
| 147                                                          | 0.6981343                        | 2.8582373                        | 0 | 0    | 0        |
| 1503                                                         | "tags=45%, list=11%, signal=50%" |                                  |   |      |          |

GSE24671\_BAKIMULC\_VS\_SENDAI\_VIRUS\_INFECTED\_MOUSE\_SPLENOCYTES\_UP  
GSE24671\_BAKIMULC\_VS\_SENDAI\_VIRUS\_INFECTED\_MOUSE\_SPLENOCYTES\_UP  
142 0.68038505 2.8564417 0 0  
0 1973 "tags=45%, list=14%, signal=52%"  
GSE24634\_TEFF\_VS\_TCONV\_DAY5\_IN\_CULTURE\_UP  
GSE24634\_TEFF\_VS\_TCONV\_DAY5\_IN\_CULTURE\_UP 152  
0.68927395 2.8559809 0 0 0  
2110 "tags=55%, list=15%, signal=64%"  
GSE15330\_HSC\_VS\_LYMPHOID\_PRIMED\_MULTIPOTENT\_PROGENITOR\_DN  
GSE15330\_HSC\_VS\_LYMPHOID\_PRIMED\_MULTIPOTENT\_PROGENITOR\_DN  
144 0.6898951 2.844418 0 0  
2358 "tags=67%, list=17%, signal=79%"  
GSE14699\_DELETIONAL\_TOLERANCE\_VS\_ACTIVATED\_CD8\_TCELL\_DN  
GSE14699\_DELETIONAL\_TOLERANCE\_VS\_ACTIVATED\_CD8\_TCELL\_DN  
131 0.6994229 2.8431845 0 0 0  
1701 "tags=59%, list=12%, signal=66%"  
GSE28726\_NAIVE\_CD4\_TCELL\_VS\_NAIVE\_VA24NEG\_NKTCELL\_UP  
GSE28726\_NAIVE\_CD4\_TCELL\_VS\_NAIVE\_VA24NEG\_NKTCELL\_UP  
152 0.68672854 2.8428822 0 0 0  
1496 "tags=44%, list=11%, signal=49%"  
GSE13547\_WT\_VS\_ZFX\_KO\_BCELL\_DN GSE13547\_WT\_VS\_ZFX\_KO\_BCELL\_DN  
136 0.68299216 2.841029 0 0 0  
2116 "tags=62%, list=15%, signal=72%"  
GSE39110\_DAY3\_VS\_DAY6\_POST\_IMMUNIZATION\_CD8\_TCELL\_WITH\_IL2\_TREATMENT  
\_UP  
GSE39110\_DAY3\_VS\_DAY6\_POST\_IMMUNIZATION\_CD8\_TCELL\_WITH\_IL2\_TREATMENT  
\_UP  
0 145 0.68458974 2.8325279 0  
0 1297 "tags=48%, list=9%, signal=53%"  
GSE24634\_NAIVE\_CD4\_TCELL\_VS\_DAY7\_IL4\_CONV\_TREG\_DN  
GSE24634\_NAIVE\_CD4\_TCELL\_VS\_DAY7\_IL4\_CONV\_TREG\_DN 161  
0.66085863 2.8270183 0 0 0  
1895 "tags=52%, list=13%, signal=60%"  
GSE25088\_WT\_VS\_STAT6\_KO\_MACROPHAGE\_IL4\_STIM\_DN  
GSE25088\_WT\_VS\_STAT6\_KO\_MACROPHAGE\_IL4\_STIM\_DN 137  
0.687397 2.823852 0 0 1645 "tags=45%,  
list=12%, signal=51%"  
GSE15930\_NAIVE\_VS\_72H\_IN\_VITRO\_STIM\_IFNAB\_CD8\_TCELL\_DN  
GSE15930\_NAIVE\_VS\_72H\_IN\_VITRO\_STIM\_IFNAB\_CD8\_TCELL\_DN  
155 0.672546 2.8218887 0 0 0  
1862 "tags=55%, list=13%, signal=62%"  
GSE9650\_EFFECTOR\_VS\_EXHAUSTED\_CD8\_TCELL\_UP  
GSE9650\_EFFECTOR\_VS\_EXHAUSTED\_CD8\_TCELL\_UP 161  
0.6758747 2.818339 0 0 0  
1810 "tags=53%, list=13%, signal=60%"  
GSE43863\_TH1\_VS\_LY6C\_LOW\_CXCR5NEG\_EFFECTOR\_CD4\_TCELL\_UP  
GSE43863\_TH1\_VS\_LY6C\_LOW\_CXCR5NEG\_EFFECTOR\_CD4\_TCELL\_UP  
147 0.6727956 2.8137655 0 0 0  
1472 "tags=50%, list=10%, signal=55%"  
GSE25085\_FETAL\_LIVER\_VS\_ADULT\_BM\_SP4\_THYMIC\_IMPLANT\_DN  
GSE25085\_FETAL\_LIVER\_VS\_ADULT\_BM\_SP4\_THYMIC\_IMPLANT\_DN  
142 0.6784559 2.80778 0 0 0  
1703 "tags=52%, list=12%, signal=59%"  
GSE43863\_TH1\_VS\_LY6C\_INT\_CXCR5POS\_EFFECTOR\_CD4\_TCELL\_UP  
GSE43863\_TH1\_VS\_LY6C\_INT\_CXCR5POS\_EFFECTOR\_CD4\_TCELL\_UP

|            |                                                            |                                 |   |      |                       |
|------------|------------------------------------------------------------|---------------------------------|---|------|-----------------------|
| 152        | 0.67223275                                                 | 2.7963166                       | 0 | 0    | 0                     |
| 2621       | "tags=69%, list=19%, signal=84%"                           |                                 |   |      |                       |
| GSE40274   | CTRL_VS_EOS_TRANSDUCED_ACTIVATED_CD4_TCELL_UP              |                                 |   |      |                       |
| GSE40274   | CTRL_VS_EOS_TRANSDUCED_ACTIVATED_CD4_TCELL_UP              |                                 |   |      |                       |
| 138        | 0.6852847                                                  | 2.7962530                       | 0 | 0    |                       |
| 1407       | "tags=51%, list=10%, signal=57%"                           |                                 |   |      |                       |
| GSE12845   | IGD_POS_BLOOD_VS_PRE_GC_TONSIL_BCELL_DN                    |                                 |   |      |                       |
| GSE12845   | IGD_POS_BLOOD_VS_PRE_GC_TONSIL_BCELL_DN                    |                                 |   |      |                       |
| 0.6762841  | 2.7710586                                                  | 0                               | 0 | 0    | 139                   |
| 1580       | "tags=47%, list=11%, signal=53%"                           |                                 |   |      |                       |
| GSE12392   | CD8A_POS_VS_NEG_SPLEEN_DC_DN                               |                                 |   |      |                       |
| GSE12392   | CD8A_POS_VS_NEG_SPLEEN_DC_DN                               |                                 |   |      |                       |
| 0.65894884 | 2.7640219                                                  | 0                               | 0 | 0    | 147                   |
| 1375       | "tags=43%, list=10%, signal=47%"                           |                                 |   |      |                       |
| GSE5142    | HTERT_TRANSDUCED_VS_CTRL_CD8_TCELL_LATE_PASSAGE_CLONE_UP   |                                 |   |      |                       |
| GSE5142    | HTERT_TRANSDUCED_VS_CTRL_CD8_TCELL_LATE_PASSAGE_CLONE_UP   |                                 |   |      |                       |
| 139        | 0.66726935                                                 | 2.7611340                       | 0 | 0    | 0                     |
| 2307       | "tags=55%, list=16%, signal=66%"                           |                                 |   |      |                       |
| GSE15930   | NAIVE_VS_72H_IN_VITRO_STIM_CD8_TCELL_DN                    |                                 |   |      |                       |
| GSE15930   | NAIVE_VS_72H_IN_VITRO_STIM_CD8_TCELL_DN                    |                                 |   |      |                       |
| 0.6609955  | 2.7517830                                                  | 0                               | 0 | 0    | 149                   |
| 2209       | "tags=60%, list=16%, signal=70%"                           |                                 |   |      |                       |
| GSE22886   | UNSTIM_VS_IL15_STIM_NKCELL_DN                              |                                 |   |      |                       |
| GSE22886   | UNSTIM_VS_IL15_STIM_NKCELL_DN                              |                                 |   |      |                       |
| 0.6542361  | 2.7511990                                                  | 0                               | 0 | 0    | 160                   |
| 2586       | "tags=64%, list=18%, signal=77%"                           |                                 |   |      |                       |
| GSE40274   | CTRL_VS_FOXP3_AND_HELIO3_TRANSDUCED_ACTIVATED_CD4_TCELL_DN |                                 |   |      |                       |
| GSE40274   | CTRL_VS_FOXP3_AND_HELIO3_TRANSDUCED_ACTIVATED_CD4_TCELL_DN |                                 |   |      |                       |
| 152        | 0.6581813                                                  | 2.7487790                       | 0 | 0    | 0                     |
| 1896       | "tags=48%, list=13%, signal=55%"                           |                                 |   |      |                       |
| GSE13547   | CTRL_VS_ANTI_IGM_STIM_BCELL_2H_UP                          |                                 |   |      |                       |
| GSE13547   | CTRL_VS_ANTI_IGM_STIM_BCELL_2H_UP                          |                                 |   |      |                       |
| 0.6655232  | 2.737390                                                   | 0                               | 0 | 0    | 138                   |
| 915        | "tags=56%, list=6%, signal=59%"                            |                                 |   |      |                       |
| GSE7852    | LN_VS_THYMUS_TCONV_DN                                      |                                 |   |      |                       |
| GSE7852    | LN_VS_THYMUS_TCONV_DN                                      |                                 |   |      |                       |
| 143        | 0.65680146                                                 | 2.7257123                       | 0 | 0    | 0                     |
| 0          | 740                                                        | "tags=35%, list=5%, signal=37%" |   |      |                       |
| GSE10239   | NAIVE_VS_KLRG1INT_EFF_CD8_TCELL_DN                         |                                 |   |      |                       |
| GSE10239   | NAIVE_VS_KLRG1INT_EFF_CD8_TCELL_DN                         |                                 |   |      |                       |
| 0.6571187  | 2.7239554                                                  | 0                               | 0 | 0    | 142                   |
| 1190       | "tags=40%, list=8%, signal=43%"                            |                                 |   |      |                       |
| GSE19825   | NAIVE_VS_DAY3_EFF_CD8_TCELL_DN                             |                                 |   |      |                       |
| GSE19825   | NAIVE_VS_DAY3_EFF_CD8_TCELL_DN                             |                                 |   |      |                       |
| 0.6642833  | 2.7201946                                                  | 0                               | 0 | 0    | 145                   |
| 2295       | "tags=54%, list=16%, signal=64%"                           |                                 |   |      |                       |
| GSE14699   | DELETIONAL_TOLERANCE_VS_ACTIVATED_CD8_TCELL_UP             |                                 |   |      |                       |
| GSE14699   | DELETIONAL_TOLERANCE_VS_ACTIVATED_CD8_TCELL_UP             |                                 |   |      |                       |
| 151        | 0.65125775                                                 | 2.7186508                       | 0 | 0    | 0                     |
| 2274       | "tags=60%, list=16%, signal=71%"                           |                                 |   |      |                       |
| GSE22886   | UNSTIM_VS_IL2_STIM_NKCELL_DN                               |                                 |   |      |                       |
| GSE22886   | UNSTIM_VS_IL2_STIM_NKCELL_DN                               |                                 |   |      |                       |
| 2.7181265  | 0                                                          | 0                               | 0 | 2474 | 157 0.644924          |
|            |                                                            |                                 |   |      | "tags=61%,            |
|            |                                                            |                                 |   |      | list=18%, signal=73%" |
| GSE22886   | NAIVE_CD4_TCELL_VS_48H_ACT_TH2_DN                          |                                 |   |      |                       |

GSE22886\_NAIVE\_CD4\_TCELL\_VS\_48H\_ACT\_TH2\_DN 154  
0.64639074 2.708443 0 0  
2420 "tags=51%, list=17%, signal=61%"  
GSE15930\_NAIVE\_VS\_72H\_IN\_VITRO\_STIM\_TRICHOSTATINA\_CD8\_TCELL\_DN  
GSE15930\_NAIVE\_VS\_72H\_IN\_VITRO\_STIM\_TRICHOSTATINA\_CD8\_TCELL\_DN  
151 0.65504014 2.7083886 0 0  
0 1910 "tags=57%, list=14%, signal=65%"  
GSE22886\_NAIVE\_CD4\_TCELL\_VS\_48H\_ACT\_TH1\_DN  
GSE22886\_NAIVE\_CD4\_TCELL\_VS\_48H\_ACT\_TH1\_DN 156  
0.6451833 2.7043798 0 0 0  
2548 "tags=62%, list=18%, signal=74%"  
GSE39110\_UNTREATED\_VS\_IL2\_TREATED\_CD8\_TCELL\_DAY3\_POST\_IMMUNIZATION\_D  
N  
GSE39110\_UNTREATED\_VS\_IL2\_TREATED\_CD8\_TCELL\_DAY3\_POST\_IMMUNIZATION\_D  
N 145 0.651958 2.6996682 0 0  
0 1058 "tags=44%, list=7%, signal=47%"  
GSE24634\_TEFF\_VS\_TCONV\_DAY10\_IN\_CULTURE\_UP  
GSE24634\_TEFF\_VS\_TCONV\_DAY10\_IN\_CULTURE\_UP 147  
0.6512839 2.696317 0 0 0  
1324 "tags=39%, list=9%, signal=43%"  
GSE21063\_CTRL\_VS\_ANTI\_IGM\_STIM\_BCELL\_NFATC1\_KO\_8H\_DN  
GSE21063\_CTRL\_VS\_ANTI\_IGM\_STIM\_BCELL\_NFATC1\_KO\_8H\_DN  
141 0.6554793 2.685251 0 0  
1301 "tags=40%, list=9%, signal=43%"  
GSE37532\_VISCERAL\_ADIPOSE\_TISSUE\_VS\_LN\_DERIVED\_PPARG\_KO\_TCONV\_CD4\_TC  
ELL\_UP  
GSE37532\_VISCERAL\_ADIPOSE\_TISSUE\_VS\_LN\_DERIVED\_PPARG\_KO\_TCONV\_CD4\_TC  
ELL\_UP 138 0.6539664 2.6825902 0  
0 0 2295 "tags=54%, list=16%, signal=63%"  
GSE36826\_WT\_VS\_IL1R\_KO\_SKIN\_STAPH\_AUREUS\_INF\_UP  
GSE36826\_WT\_VS\_IL1R\_KO\_SKIN\_STAPH\_AUREUS\_INF\_UP 158  
0.636575 2.6781924 0 0 0  
2276 "tags=54%, list=16%, signal=64%"  
GSE37532\_WT\_VS\_PPARG\_KO\_LN\_TCONV\_DN  
GSE37532\_WT\_VS\_PPARG\_KO\_LN\_TCONV\_DN 136  
0.64824706 2.6738932 0 0 0  
1653 "tags=51%, list=12%, signal=58%"  
GSE7764\_IL15\_TREATED\_VS\_CTRL\_NK\_CELL\_24H\_UP  
GSE7764\_IL15\_TREATED\_VS\_CTRL\_NK\_CELL\_24H\_UP 146  
0.65088737 2.668331 0 0  
736 "tags=33%, list=5%, signal=34%"  
GSE15930\_NAIVE\_VS\_48H\_IN\_VITRO\_STIM\_IFNAB\_CD8\_TCELL\_DN  
GSE15930\_NAIVE\_VS\_48H\_IN\_VITRO\_STIM\_IFNAB\_CD8\_TCELL\_DN  
163 0.64458597 2.6674898 0 0 0  
2115 "tags=52%, list=15%, signal=60%"  
GSE9006\_HEALTHY\_VS\_TYPE\_2\_DIABETES\_PBMC\_AT\_DX\_UP  
GSE9006\_HEALTHY\_VS\_TYPE\_2\_DIABETES\_PBMC\_AT\_DX\_UP 142  
0.65568805 2.6616974 0 0 0  
2270 "tags=56%, list=16%, signal=66%"  
GSE24574\_BCL6\_HIGH\_VS\_LOW\_TFH\_CD4\_TCELL\_DN  
GSE24574\_BCL6\_HIGH\_VS\_LOW\_TFH\_CD4\_TCELL\_DN 148  
0.6368096 2.6602654 0 0 0  
2293 "tags=51%, list=16%, signal=61%"  
GSE22601\_DOUBLE\_POSITIVE\_VS\_CD4\_SINGLE\_POSITIVE\_THYMOCYTE\_DN

|                                                                   |                                  |                                  |           |   |     |
|-------------------------------------------------------------------|----------------------------------|----------------------------------|-----------|---|-----|
| GSE22601_DOUBLE_POSITIVE_VS_CD4_SINGLE_POSITIVE_THYMOCYTE_DN      | 146                              | 0.6492296                        | 2.6563344 | 0 | 0   |
| 0                                                                 | 1615                             | "tags=47%, list=11%, signal=52%" |           |   |     |
| GSE32986_GMCSF_VS_GMCSF_AND_CURDLAN_LOWDOSE_STIM_DC_UP            |                                  |                                  |           |   |     |
| GSE32986_GMCSF_VS_GMCSF_AND_CURDLAN_LOWDOSE_STIM_DC_UP            | 150                              | 0.64130694                       | 2.6480868 | 0 | 0   |
| 1922                                                              | "tags=51%, list=14%, signal=58%" |                                  |           |   |     |
| GSE3982_NKCELL_VS_TH2_DN                                          |                                  |                                  |           |   | 151 |
| GSE3982_NKCELL_VS_TH2_DN                                          | 0.6327275                        | 2.6433520                        | 0         | 0 |     |
| 1977                                                              | "tags=45%, list=14%, signal=52%" |                                  |           |   |     |
| GSE40274_FOXP3_VS_FOXP3_AND_EOS_TRANSDUCED_ACTIVATED_CD4_TCELL_DN |                                  |                                  |           |   |     |
| GSE40274_FOXP3_VS_FOXP3_AND_EOS_TRANSDUCED_ACTIVATED_CD4_TCELL_DN | 129                              | 0.6619322                        | 2.6429143 | 0 | 0   |
| 0                                                                 | 776                              | "tags=40%, list=5%, signal=41%"  |           |   |     |
| GSE29614_CTRL_VS_DAY7_TIV_FLU_VACCINE_PBMC_DN                     |                                  |                                  |           |   |     |
| GSE29614_CTRL_VS_DAY7_TIV_FLU_VACCINE_PBMC_DN                     |                                  |                                  |           |   | 125 |
| 0.65756404                                                        | 2.63784                          | 0                                | 0         | 0 |     |
| 1273                                                              | "tags=37%, list=9%, signal=40%"  |                                  |           |   |     |
| GSE45365_HEALTHY_VS_MCMV_INFECTION_CD11B_DC_DN                    |                                  |                                  |           |   |     |
| GSE45365_HEALTHY_VS_MCMV_INFECTION_CD11B_DC_DN                    |                                  |                                  |           |   | 113 |
| 0.6569679                                                         | 2.6200056                        | 0                                | 0         | 0 |     |
| 552                                                               | "tags=27%, list=4%, signal=28%"  |                                  |           |   |     |
| GSE3982_CENT_MEMORY_CD4_TCELL_VS_TH1_DN                           |                                  |                                  |           |   |     |
| GSE3982_CENT_MEMORY_CD4_TCELL_VS_TH1_DN                           |                                  |                                  |           |   | 148 |
| 0.62779796                                                        | 2.6080918                        | 0                                | 0         | 0 |     |
| 1798                                                              | "tags=49%, list=13%, signal=55%" |                                  |           |   |     |
| GSE3982_MEMORY_CD4_TCELL_VS_TH2_DN                                |                                  |                                  |           |   |     |
| GSE3982_MEMORY_CD4_TCELL_VS_TH2_DN                                |                                  |                                  |           |   | 150 |
| 0.62820786                                                        | 2.6036837                        | 0                                | 0         | 0 |     |
| 1270                                                              | "tags=39%, list=9%, signal=42%"  |                                  |           |   |     |
| GSE28237_FOLLICULAR_VS_EARLY_GC_BCELL_DN                          |                                  |                                  |           |   |     |
| GSE28237_FOLLICULAR_VS_EARLY_GC_BCELL_DN                          |                                  |                                  |           |   | 152 |
| 0.62275946                                                        | 2.6014333                        | 0                                | 0         | 0 |     |
| 1310                                                              | "tags=35%, list=9%, signal=38%"  |                                  |           |   |     |
| GSE21546_ELK1_KO_VS_SAP1A_KO_AND_ELK1_KO_DP_THYMOCYTES_DN         |                                  |                                  |           |   |     |
| GSE21546_ELK1_KO_VS_SAP1A_KO_AND_ELK1_KO_DP_THYMOCYTES_DN         |                                  |                                  |           |   |     |
| 138                                                               | 0.64299214                       | 2.5989920                        | 0         | 0 | 0   |
| 2313                                                              | "tags=49%, list=16%, signal=57%" |                                  |           |   |     |
| GSE40068_CXCR5NEG_BCL6NEG_CD4_TCELL_VS_CXCR5POS_BCL6NEG_TFH_UP    |                                  |                                  |           |   |     |
| GSE40068_CXCR5NEG_BCL6NEG_CD4_TCELL_VS_CXCR5POS_BCL6NEG_TFH_UP    | 146                              | 0.6240541                        | 2.5859892 | 0 | 0   |
| 0                                                                 | 2257                             | "tags=53%, list=16%, signal=62%" |           |   |     |
| GSE34205_HEALTHY_VS_RSV_INF_INFANT_PBMC_DN                        |                                  |                                  |           |   |     |
| GSE34205_HEALTHY_VS_RSV_INF_INFANT_PBMC_DN                        |                                  |                                  |           |   | 139 |
| 0.6198443                                                         | 2.5831923                        | 0                                | 0         | 0 |     |
| 1751                                                              | "tags=39%, list=12%, signal=44%" |                                  |           |   |     |
| GSE12845_NAIVE_VS_PRE_GC_TONSIL_BCELL_DN                          |                                  |                                  |           |   |     |
| GSE12845_NAIVE_VS_PRE_GC_TONSIL_BCELL_DN                          |                                  |                                  |           |   | 154 |
| 0.61578417                                                        | 2.5826430                        | 0                                | 0         | 0 |     |
| 2442                                                              | "tags=55%, list=17%, signal=65%" |                                  |           |   |     |
| GSE9006_TYPE_1_VS_TYPE_2_DIABETES_PBMC_AT_DX_UP                   |                                  |                                  |           |   |     |
| GSE9006_TYPE_1_VS_TYPE_2_DIABETES_PBMC_AT_DX_UP                   |                                  |                                  |           |   | 154 |
| 0.6236098                                                         | 2.5805986                        | 0                                | 0         | 0 |     |
| 2047                                                              | "tags=45%, list=15%, signal=53%" |                                  |           |   |     |



GSE16451\_CTRL\_VS\_WEST\_EQUINE\_ENC\_VIRUS\_IMMATURE\_NEURON\_CELL\_LINE\_DN  
GSE16451\_CTRL\_VS\_WEST\_EQUINE\_ENC\_VIRUS\_IMMATURE\_NEURON\_CELL\_LINE\_DN  
144 0.6183405 2.579624 0 0  
1597 "tags=39%, list=11%, signal=43%"  
GSE21927\_SPLEEN\_C57BL6\_VS\_EL4\_TUMOR\_BALBC\_MONOCYTES\_DN  
GSE21927\_SPLEEN\_C57BL6\_VS\_EL4\_TUMOR\_BALBC\_MONOCYTES\_DN  
159 0.61917 2.5737414 0 0 0  
2697 "tags=56%, list=19%, signal=68%"  
GSE45365\_WT\_VS\_IFNAR\_KO\_BCELL\_DN GSE45365\_WT\_VS\_IFNAR\_KO\_BCELL\_DN  
109 0.65398026 2.5721624 0 0  
0 776 "tags=30%, list=5%, signal=32%"  
GSE22313\_HEALTHY\_VS\_SLE\_MOUSE\_CD4\_TCELL\_DN  
GSE22313\_HEALTHY\_VS\_SLE\_MOUSE\_CD4\_TCELL\_DN 140  
0.6116361 2.551419 0 0  
1258 "tags=35%, list=9%, signal=38%"  
GSE45365\_WT\_VS\_IFNAR\_KO\_CD11B\_DC\_MCMV\_INFECTION\_DN  
GSE45365\_WT\_VS\_IFNAR\_KO\_CD11B\_DC\_MCMV\_INFECTION\_DN 108  
0.6481348 2.5478394 0 0 0  
709 "tags=25%, list=5%, signal=26%"  
GSE9601\_UNTREATED\_VS\_PI3K\_INHIBITOR\_TREATED\_HCMV\_INF\_MONOCYTE\_UP  
GSE9601\_UNTREATED\_VS\_PI3K\_INHIBITOR\_TREATED\_HCMV\_INF\_MONOCYTE\_UP  
139 0.62458324 2.5412438 0 0  
0 2156 "tags=54%, list=15%, signal=63%"  
GSE32986\_UNSTIM\_VS\_CURDLAN\_LOWDOSE\_STIM\_DC\_DN  
GSE32986\_UNSTIM\_VS\_CURDLAN\_LOWDOSE\_STIM\_DC\_DN 151  
0.61258316 2.5386395 0 0 0  
1639 "tags=43%, list=12%, signal=48%"  
GSE21670\_IL6\_VS\_TGFB\_AND\_IL6\_TREATED\_STAT3\_KO\_CD4\_TCELL\_UP  
GSE21670\_IL6\_VS\_TGFB\_AND\_IL6\_TREATED\_STAT3\_KO\_CD4\_TCELL\_UP  
141 0.61036044 2.5382388 0 0 0  
2275 "tags=51%, list=16%, signal=60%"  
GSE2405\_0H\_VS\_9H\_A\_PHAGOCYTOPHILUM\_STIM\_NEUTROPHIL\_DN  
GSE2405\_0H\_VS\_9H\_A\_PHAGOCYTOPHILUM\_STIM\_NEUTROPHIL\_DN  
116 0.63601685 2.536018 0 0  
2676 "tags=60%, list=19%, signal=74%"  
GSE32164\_ALTERNATIVELY\_ACT\_M2\_VS\_CMYC\_INHIBITED\_MACROPHAGE\_DN  
GSE32164\_ALTERNATIVELY\_ACT\_M2\_VS\_CMYC\_INHIBITED\_MACROPHAGE\_DN  
153 0.6063723 2.5346525 0 0  
0 1804 "tags=46%, list=13%, signal=53%"  
GSE15930\_NAIVE\_VS\_24H\_IN\_VITRO\_STIM\_CD8\_TCELL\_DN  
GSE15930\_NAIVE\_VS\_24H\_IN\_VITRO\_STIM\_CD8\_TCELL\_DN 155  
0.61407876 2.5330005 0 0 0  
1935 "tags=52%, list=14%, signal=59%"  
GSE25088\_WT\_VS\_STAT6\_KO\_MACROPHAGE\_DN  
GSE25088\_WT\_VS\_STAT6\_KO\_MACROPHAGE\_DN 140  
0.61719376 2.5300953 0 0 0  
1928 "tags=43%, list=14%, signal=49%"  
GSE37301\_HEMATOPOIETIC\_STEM\_CELL\_VS\_CD4\_TCELL\_UP  
GSE37301\_HEMATOPOIETIC\_STEM\_CELL\_VS\_CD4\_TCELL\_UP 139  
0.6217151 2.528301 0 0  
1871 "tags=45%, list=13%, signal=52%"  
GSE5589\_WT\_VS\_IL6\_KO\_LPS\_AND\_IL10\_STIM\_MACROPHAGE\_45MIN\_UP  
GSE5589\_WT\_VS\_IL6\_KO\_LPS\_AND\_IL10\_STIM\_MACROPHAGE\_45MIN\_UP  
147 0.6089877 2.5249362 0 0 0

1905 "tags=39%, list=13%, signal=45%"  
GSE24634\_TREG\_VS\_TCONV\_POST\_DAY3\_IL4\_CONVERSION\_UP  
GSE24634\_TREG\_VS\_TCONV\_POST\_DAY3\_IL4\_CONVERSION\_UP 149  
0.612257 2.523744 0 0 2645 "tags=55%,  
list=19%, signal=67%"  
GSE3982\_EFF\_MEMORY\_CD4\_TCELL\_VS\_TH2\_DN  
GSE3982\_EFF\_MEMORY\_CD4\_TCELL\_VS\_TH2\_DN 153  
0.60296255 2.5182736 0 0 0  
2242 "tags=50%, list=16%, signal=58%"  
GSE18203\_CTRL\_VS\_INTRATUMORAL\_CPG\_INJ\_MC38\_TUMOR\_DN  
GSE18203\_CTRL\_VS\_INTRATUMORAL\_CPG\_INJ\_MC38\_TUMOR\_DN  
155 0.5954051 2.5139892 0 0 0  
1705 "tags=50%, list=12%, signal=57%"  
GSE15930\_NAIVE\_VS\_24H\_IN\_VITRO\_STIM\_IL12\_CD8\_TCELL\_DN  
GSE15930\_NAIVE\_VS\_24H\_IN\_VITRO\_STIM\_IL12\_CD8\_TCELL\_DN  
155 0.60220075 2.511217 0 0 0  
2243 "tags=54%, list=16%, signal=64%"  
GSE6259\_FLT3L\_INDUCED\_DEC205\_POS\_DC\_VS\_BCELL\_DN  
GSE6259\_FLT3L\_INDUCED\_DEC205\_POS\_DC\_VS\_BCELL\_DN 129  
0.6202054 2.5049446 0 0 0  
1569 "tags=43%, list=11%, signal=48%"  
GSE22886\_UNSTIM\_VS\_STIM\_MEMORY\_TCELL\_DN  
GSE22886\_UNSTIM\_VS\_STIM\_MEMORY\_TCELL\_DN 157  
0.59870696 2.5047152 0 0 0  
2389 "tags=49%, list=17%, signal=58%"  
GSE33425\_CD8\_ALPHAALPHA\_VS\_ALPHABETA\_CD161\_HIGH\_TCELL\_DN  
GSE33425\_CD8\_ALPHAALPHA\_VS\_ALPHABETA\_CD161\_HIGH\_TCELL\_DN  
161 0.5986556 2.503509 0 0 0  
1804 "tags=49%, list=13%, signal=56%"  
GSE15930\_NAIVE\_VS\_24H\_IN\_VITRO\_STIM\_INFAB\_CD8\_TCELL\_DN  
GSE15930\_NAIVE\_VS\_24H\_IN\_VITRO\_STIM\_INFAB\_CD8\_TCELL\_DN  
156 0.6025294 2.5033822 0 0 0  
1935 "tags=51%, list=14%, signal=59%"  
GSE14415\_ACT\_VS\_CTRL\_NATURAL\_TREG\_UP  
GSE14415\_ACT\_VS\_CTRL\_NATURAL\_TREG\_UP 135  
0.6068627 2.4954836 0 0 0  
2281 "tags=50%, list=16%, signal=60%"  
GSE19923\_WT\_VS\_HEB\_AND\_E2A\_KO\_DP\_THYMOCYTE\_UP  
GSE19923\_WT\_VS\_HEB\_AND\_E2A\_KO\_DP\_THYMOCYTE\_UP 157  
0.5998507 2.4954605 0 0 0  
1819 "tags=40%, list=13%, signal=46%"  
GSE2770\_UNTREATED\_VS\_IL4\_TREATED\_ACT\_CD4\_TCELL\_48H\_DN  
GSE2770\_UNTREATED\_VS\_IL4\_TREATED\_ACT\_CD4\_TCELL\_48H\_DN  
140 0.6124492 2.4894364 0 0 0  
2313 "tags=56%, list=16%, signal=67%"  
GSE3720\_UNSTIM\_VS\_PMA\_STIM\_VD2\_GAMMADELTA\_TCELL\_DN  
GSE3720\_UNSTIM\_VS\_PMA\_STIM\_VD2\_GAMMADELTA\_TCELL\_DN 146  
0.6001136 2.4880924 0 0 0  
2332 "tags=51%, list=17%, signal=61%"  
GSE28408\_LY6G\_POS\_VS\_NEG\_DC\_DN GSE28408\_LY6G\_POS\_VS\_NEG\_DC\_DN  
146 0.6030568 2.4864986 0 0  
0 1673 "tags=47%, list=12%, signal=53%"  
GSE3982\_CENT\_MEMORY\_CD4\_TCELL\_VS\_TH2\_DN  
GSE3982\_CENT\_MEMORY\_CD4\_TCELL\_VS\_TH2\_DN 157 0.589623

2.4837284 0 0 0 1735 "tags=39%,  
 list=12%, signal=44%"  
 GSE9509\_LPS\_VS\_LPS\_AND\_IL10\_STIM\_IL10\_KO\_MACROPHAGE\_20MIN\_DN  
 GSE9509\_LPS\_VS\_LPS\_AND\_IL10\_STIM\_IL10\_KO\_MACROPHAGE\_20MIN\_DN  
 146 0.6001523 2.4812777 0 0  
 0 2026 "tags=47%, list=14%, signal=54%"  
 GSE3982\_NKCELL\_VS\_TH1\_DN GSE3982\_NKCELL\_VS\_TH1\_DN 155  
 0.592321 2.4807045 0 0 0  
 1694 "tags=37%, list=12%, signal=42%"  
 GSE40068\_BCL6\_POS\_VS\_NEG\_CXCR5\_POS\_TFH\_UP  
 GSE40068\_BCL6\_POS\_VS\_NEG\_CXCR5\_POS\_TFH\_UP 149  
 0.59915423 2.473783 0 0 0  
 1816 "tags=47%, list=13%, signal=53%"  
 GSE20727\_CTRL\_VS\_ROS\_INH\_AND\_DNFB\_ALLERGEN\_TREATED\_DC\_DN  
 GSE20727\_CTRL\_VS\_ROS\_INH\_AND\_DNFB\_ALLERGEN\_TREATED\_DC\_DN  
 133 0.6005652 2.4727142 0 0 0  
 2362 "tags=44%, list=17%, signal=53%"  
 GSE7509\_UNSTIM\_VS\_IFNA\_STIM\_IMMATURE\_DC\_UP  
 GSE7509\_UNSTIM\_VS\_IFNA\_STIM\_IMMATURE\_DC\_UP 133  
 0.6010014 2.471666 0 0 0  
 1599 "tags=36%, list=11%, signal=40%"  
 GSE25146\_UNSTIM\_VS\_HELIOBACTER\_PYLORI\_LPS\_STIM\_AGS\_CELL\_UP  
 GSE25146\_UNSTIM\_VS\_HELIOBACTER\_PYLORI\_LPS\_STIM\_AGS\_CELL\_UP  
 142 0.59852684 2.4711654 0 0 0  
 1947 "tags=44%, list=14%, signal=51%"  
 GSE17301\_CTRL\_VS\_48H\_ACD3\_ACD28\_IFNA2\_STIM\_CD8\_TCELL\_DN  
 GSE17301\_CTRL\_VS\_48H\_ACD3\_ACD28\_IFNA2\_STIM\_CD8\_TCELL\_DN  
 138 0.58892107 2.4610934 0 0 0  
 904 "tags=25%, list=6%, signal=27%"  
 GSE14415\_TCONV\_VS\_FOXP3\_KO\_INDUCED\_TREG\_UP  
 GSE14415\_TCONV\_VS\_FOXP3\_KO\_INDUCED\_TREG\_UP 133  
 0.5951013 2.45899 0 0 0  
 2583 "tags=60%, list=18%, signal=73%"  
 GSE411\_WT\_VS\_SOCS3\_KO\_MACROPHAGE\_IL6\_STIM\_100MIN\_UP  
 GSE411\_WT\_VS\_SOCS3\_KO\_MACROPHAGE\_IL6\_STIM\_100MIN\_UP  
 154 0.5887366 2.457361 0 0 0  
 2253 "tags=46%, list=16%, signal=54%"  
 GSE2770\_IL12\_AND\_TGFB\_VS\_IL4\_TREATED\_ACT\_CD4\_TCELL\_6H\_UP  
 GSE2770\_IL12\_AND\_TGFB\_VS\_IL4\_TREATED\_ACT\_CD4\_TCELL\_6H\_UP  
 149 0.5988964 2.4569511 0 0 0  
 1817 "tags=35%, list=13%, signal=40%"  
 GSE17301\_ACD3\_ACD28\_VS\_ACD3\_ACD28\_AND\_IFNA5\_STIM\_CD8\_TCELL\_UP  
 GSE17301\_ACD3\_ACD28\_VS\_ACD3\_ACD28\_AND\_IFNA5\_STIM\_CD8\_TCELL\_UP  
 136 0.6052465 2.4567094 0 0 0  
 0 1241 "tags=31%, list=9%, signal=34%"  
 GSE24634\_TREG\_VS\_TCONV\_POST\_DAY10\_IL4\_CONVERSION\_UP  
 GSE24634\_TREG\_VS\_TCONV\_POST\_DAY10\_IL4\_CONVERSION\_UP  
 157 0.5883456 2.453566 0 0 0  
 1901 "tags=46%, list=13%, signal=52%"  
 GSE24634\_TREG\_VS\_TCONV\_POST\_DAY5\_IL4\_CONVERSION\_UP  
 GSE24634\_TREG\_VS\_TCONV\_POST\_DAY5\_IL4\_CONVERSION\_UP 147  
 0.5905059 2.4500937 0 0 0  
 2089 "tags=48%, list=15%, signal=56%"  
 GSE40666\_WT\_VS\_STAT1\_KO\_CD8\_TCELL\_WITH\_IFNA\_STIM\_90MIN\_DN

GSE40666\_WT\_VS\_STAT1\_KO\_CD8\_TCELL\_WITH\_IFNA\_STIM\_90MIN\_DN  
160 0.5840697 2.449145 0 0  
1049 "tags=36%, list=7%, signal=38%"  
GSE32901\_NAIVE\_VS\_TH17\_NEG\_CD4\_TCELL\_UP  
GSE32901\_NAIVE\_VS\_TH17\_NEG\_CD4\_TCELL\_UP 136  
0.5981389 2.4468088 0 0 0  
1297 "tags=36%, list=9%, signal=39%"  
GSE40225\_WT\_VS\_RIP\_B7X\_DIABETIC\_MOUSE\_PANCREATIC\_CD8\_TCELL\_DN  
GSE40225\_WT\_VS\_RIP\_B7X\_DIABETIC\_MOUSE\_PANCREATIC\_CD8\_TCELL\_DN  
0 148 0.58486927 2.4460025 0 0  
0 2564 "tags=49%, list=18%, signal=59%"  
GSE21670\_UNTREATED\_VS\_TGFB\_IL6\_TREATED\_CD4\_TCELL\_UP  
GSE21670\_UNTREATED\_VS\_TGFB\_IL6\_TREATED\_CD4\_TCELL\_UP  
125 0.60750455 2.4431272 0 0 0  
1246 "tags=38%, list=9%, signal=42%"  
GSE3982\_BCELL\_VS\_TH2\_DN GSE3982\_BCELL\_VS\_TH2\_DN 143  
0.5883848 2.4357803 0 0 0  
1275 "tags=28%, list=9%, signal=30%"  
GSE12845\_IGD\_NEG\_BLOOD\_VS\_NAIVE\_TONSIL\_BCELL\_UP  
GSE12845\_IGD\_NEG\_BLOOD\_VS\_NAIVE\_TONSIL\_BCELL\_UP 151  
0.5853255 2.4330666 0 0 0  
2617 "tags=51%, list=19%, signal=62%"  
GSE15930\_NAIVE\_VS\_72H\_IN\_VITRO\_STIM\_IL12\_CD8\_TCELL\_DN  
GSE15930\_NAIVE\_VS\_72H\_IN\_VITRO\_STIM\_IL12\_CD8\_TCELL\_DN  
162 0.5859038 2.4315937 0 0 0  
1553 "tags=44%, list=11%, signal=49%"  
GSE17974\_CTRL\_VS\_ACT\_IL4\_AND\_ANTI\_IL12\_24H\_CD4\_TCELL\_DN  
GSE17974\_CTRL\_VS\_ACT\_IL4\_AND\_ANTI\_IL12\_24H\_CD4\_TCELL\_DN  
142 0.58871824 2.4286215 0 0 0  
2035 "tags=46%, list=14%, signal=53%"  
GSE12963\_ENV\_NEF\_VS\_ENV\_NEF\_AND\_VPR\_DEFICIENT\_HIV1\_INF\_CD4\_TCELL\_DN  
GSE12963\_ENV\_NEF\_VS\_ENV\_NEF\_AND\_VPR\_DEFICIENT\_HIV1\_INF\_CD4\_TCELL\_DN  
117 0.5991131 2.421048 0 0 0  
1065 "tags=26%, list=8%, signal=28%"  
GSE45837\_WT\_VS\_GFI1\_KO\_PDC\_DN GSE45837\_WT\_VS\_GFI1\_KO\_PDC\_DN  
156 0.58249253 2.4199922 0 0  
0 2724 "tags=60%, list=19%, signal=73%"  
GSE20727\_DNFB\_ALLERGEN\_VS\_ROS\_INH\_AND\_DNFB\_ALLERGEN\_TREATED\_DC\_DN  
GSE20727\_DNFB\_ALLERGEN\_VS\_ROS\_INH\_AND\_DNFB\_ALLERGEN\_TREATED\_DC\_DN  
143 0.582463 2.4180481 0 0 0  
1263 "tags=35%, list=9%, signal=38%"  
GSE12366\_GC\_VS\_MEMORY\_BCELL\_UP GSE12366\_GC\_VS\_MEMORY\_BCELL\_UP  
134 0.5935658 2.4136615 0 0  
0 1949 "tags=44%, list=14%, signal=51%"  
GSE12366\_GC\_VS\_NAIVE\_BCELL\_UP GSE12366\_GC\_VS\_NAIVE\_BCELL\_UP  
149 0.58573806 2.413124 0 0 0  
2216 "tags=46%, list=16%, signal=54%"  
GSE3039\_B2\_VS\_B1\_BCELL\_DN GSE3039\_B2\_VS\_B1\_BCELL\_DN 145  
0.5860225 2.412156 0 0 0  
1981 "tags=41%, list=14%, signal=48%"  
GSE3720\_VD1\_VS\_VD2\_GAMMADELTA\_TCELL\_WITH\_LPS\_STIM\_DN  
GSE3720\_VD1\_VS\_VD2\_GAMMADELTA\_TCELL\_WITH\_LPS\_STIM\_DN  
141 0.5859902 2.4104795 0 0 0  
2218 "tags=48%, list=16%, signal=57%"

|                                                                            |                                  |           |                                  |   |  |     |
|----------------------------------------------------------------------------|----------------------------------|-----------|----------------------------------|---|--|-----|
| GSE20727_CTRL_VS_DNFB_ALLERGEN_TREATED_DC_UP                               |                                  |           |                                  |   |  |     |
| GSE20727_CTRL_VS_DNFB_ALLERGEN_TREATED_DC_UP                               |                                  |           |                                  |   |  | 149 |
| 0.58292454                                                                 | 2.4083626                        | 0         | 0                                | 0 |  |     |
| 1358                                                                       | "tags=34%, list=10%, signal=37%" |           |                                  |   |  |     |
| GSE19941_UNSTIM_VS_LPS_AND_IL10_STIM_IL10_KO_MACROPHAGE_DN                 |                                  |           |                                  |   |  |     |
| GSE19941_UNSTIM_VS_LPS_AND_IL10_STIM_IL10_KO_MACROPHAGE_DN                 |                                  |           |                                  |   |  |     |
| 138                                                                        | 0.5903348                        | 2.4073522 | 0                                | 0 |  | 0   |
| 2075                                                                       | "tags=41%, list=15%, signal=48%" |           |                                  |   |  |     |
| GSE19941_IL10_KO_VS_IL10_KO_AND_NFKBP50_KO_LPS_AND_IL10_STIM_MACROPHAGE_DN |                                  |           |                                  |   |  |     |
| GSE19941_IL10_KO_VS_IL10_KO_AND_NFKBP50_KO_LPS_AND_IL10_STIM_MACROPHAGE_DN |                                  |           |                                  |   |  |     |
| AGE_DN                                                                     | 136                              | 0.5899889 | 2.4072094                        |   |  | 0   |
| 0                                                                          | 0                                | 1713      | "tags=44%, list=12%, signal=50%" |   |  |     |
| GSE24026_PD1_LIGATION_VS_CTRL_IN_ACT_TCELL_LINE_DN                         |                                  |           |                                  |   |  |     |
| GSE24026_PD1_LIGATION_VS_CTRL_IN_ACT_TCELL_LINE_DN                         |                                  |           |                                  |   |  | 143 |
| 0.5783402                                                                  | 2.4067260                        | 0         | 0                                |   |  |     |
| 2529                                                                       | "tags=45%, list=18%, signal=54%" |           |                                  |   |  |     |
| GSE10239_MEMORY_VS_KLRG1INT_EFF_CD8_TCELL_DN                               |                                  |           |                                  |   |  |     |
| GSE10239_MEMORY_VS_KLRG1INT_EFF_CD8_TCELL_DN                               |                                  |           |                                  |   |  | 146 |
| 0.58496135                                                                 | 2.4038494                        | 0         | 0                                | 0 |  |     |
| 1984                                                                       | "tags=38%, list=14%, signal=44%" |           |                                  |   |  |     |
| GSE40274_CTRL_VS_XBP1_TRANSDUCED_ACTIVATED_CD4_TCELL_DN                    |                                  |           |                                  |   |  |     |
| GSE40274_CTRL_VS_XBP1_TRANSDUCED_ACTIVATED_CD4_TCELL_DN                    |                                  |           |                                  |   |  |     |
| 133                                                                        | 0.5900242                        | 2.3938165 | 0                                | 0 |  | 0   |
| 1953                                                                       | "tags=41%, list=14%, signal=48%" |           |                                  |   |  |     |
| GSE10500_ARTHROITIC_SYNOVIAL_FLUID_VS_HEALTHY_MACROPHAGE_UP                |                                  |           |                                  |   |  |     |
| GSE10500_ARTHROITIC_SYNOVIAL_FLUID_VS_HEALTHY_MACROPHAGE_UP                |                                  |           |                                  |   |  |     |
| 117                                                                        | 0.59644145                       | 2.3929410 | 0                                | 0 |  |     |
| 1939                                                                       | "tags=38%, list=14%, signal=44%" |           |                                  |   |  |     |
| GSE45365_WT_VS_IFNAR_KO_BCELL_MCMV_INFECTION_DN                            |                                  |           |                                  |   |  |     |
| GSE45365_WT_VS_IFNAR_KO_BCELL_MCMV_INFECTION_DN                            |                                  |           |                                  |   |  | 116 |
| 0.5948199                                                                  | 2.3926413                        | 0         | 0                                | 0 |  |     |
| 552                                                                        | "tags=24%, list=4%, signal=25%"  |           |                                  |   |  |     |
| GSE22886_NAIVE_CD4_TCELL_VS_12H_ACT_TH2_DN                                 |                                  |           |                                  |   |  |     |
| GSE22886_NAIVE_CD4_TCELL_VS_12H_ACT_TH2_DN                                 |                                  |           |                                  |   |  | 155 |
| 0.5689719                                                                  | 2.3917584                        | 0         | 0                                | 0 |  |     |
| 2548                                                                       | "tags=52%, list=18%, signal=63%" |           |                                  |   |  |     |
| GSE21670_TGFB_VS_TGFB_AND_IL6_TREATED_STAT3_KO_CD4_TCELL_DN                |                                  |           |                                  |   |  |     |
| GSE21670_TGFB_VS_TGFB_AND_IL6_TREATED_STAT3_KO_CD4_TCELL_DN                |                                  |           |                                  |   |  |     |
| 152                                                                        | 0.57494336                       | 2.3911855 | 0                                | 0 |  | 0   |
| 2257                                                                       | "tags=47%, list=16%, signal=56%" |           |                                  |   |  |     |
| GSE17974_0.5H_VS_72H_UNTREATED_IN_VITRO_CD4_TCELL_DN                       |                                  |           |                                  |   |  |     |
| GSE17974_0.5H_VS_72H_UNTREATED_IN_VITRO_CD4_TCELL_DN                       |                                  |           |                                  |   |  |     |
| 145                                                                        | 0.5720194                        | 2.3894746 | 0                                | 0 |  | 0   |
| 2658                                                                       | "tags=51%, list=19%, signal=62%" |           |                                  |   |  |     |
| GSE20727_CTRL_VS_ROS_INHIBITOR_TREATED_DC_DN                               |                                  |           |                                  |   |  |     |
| GSE20727_CTRL_VS_ROS_INHIBITOR_TREATED_DC_DN                               |                                  |           |                                  |   |  | 142 |
| 0.5799407                                                                  | 2.3881369                        | 0         | 0                                | 0 |  |     |
| 2449                                                                       | "tags=52%, list=17%, signal=62%" |           |                                  |   |  |     |
| GSE2405_0H_VS_12H_A_PHAGOCYTOPHILUM_STIM_NEUTROPHIL_DN                     |                                  |           |                                  |   |  |     |
| GSE2405_0H_VS_12H_A_PHAGOCYTOPHILUM_STIM_NEUTROPHIL_DN                     |                                  |           |                                  |   |  |     |
| 149                                                                        | 0.57084703                       | 2.3853555 | 0                                | 0 |  | 0   |
| 896                                                                        | "tags=24%, list=6%, signal=26%"  |           |                                  |   |  |     |
| GSE1460_INTRATHYMIC_T_PROGENITOR_VS_NAIVE_CD4_TCELL_ADULT_BLOOD_UP         |                                  |           |                                  |   |  |     |

|                                                                    |                                  |                                  |           |   |   |     |
|--------------------------------------------------------------------|----------------------------------|----------------------------------|-----------|---|---|-----|
| GSE1460_INTRATHYMIC_T_PROGENITOR_VS_NAIVE_CD4_TCELL_ADULT_BLOOD_UP | 163                              | 0.57414716                       | 2.3840444 | 0 | 0 |     |
| 0                                                                  | 1946                             | "tags=45%, list=14%, signal=52%" |           |   |   |     |
| GSE17301_IFNA2_VS_IFNA5_STIM_ACD3_ACD28_ACT_CD8_TCELL_DN           |                                  |                                  |           |   |   |     |
| GSE17301_IFNA2_VS_IFNA5_STIM_ACD3_ACD28_ACT_CD8_TCELL_DN           | 145                              | 0.57936716                       | 2.3838136 | 0 | 0 | 0   |
| 2225                                                               | "tags=37%, list=16%, signal=44%" |                                  |           |   |   |     |
| GSE21546_UNSTIM_VS_ANTI_CD3_STIM_DP_THYMOCYTES_DN                  |                                  |                                  |           |   |   |     |
| GSE21546_UNSTIM_VS_ANTI_CD3_STIM_DP_THYMOCYTES_DN                  |                                  |                                  |           |   |   | 139 |
| 0.57870984                                                         | 2.3776212                        | 0                                | 0         | 0 |   |     |
| 1726                                                               | "tags=35%, list=12%, signal=40%" |                                  |           |   |   |     |
| GSE3982_MAC_VS_TH1_DN                                              | GSE3982_MAC_VS_TH1_DN            |                                  |           |   |   | 143 |
| 0.5742005                                                          | 2.3757503                        | 0                                | 0         | 0 |   |     |
| 1672                                                               | "tags=36%, list=12%, signal=41%" |                                  |           |   |   |     |
| GSE26669_CTRL_VS_COSTIM_BLOCK_MLR_CD8_TCELL_UP                     |                                  |                                  |           |   |   |     |
| GSE26669_CTRL_VS_COSTIM_BLOCK_MLR_CD8_TCELL_UP                     |                                  |                                  |           |   |   | 147 |
| 0.5722038                                                          | 2.3755436                        | 0                                | 0         | 0 |   |     |
| 2388                                                               | "tags=48%, list=17%, signal=58%" |                                  |           |   |   |     |
| GSE19888_CTRL_VS_A3R_INHIBITOR_TREATED_MAST_CELL_UP                |                                  |                                  |           |   |   |     |
| GSE19888_CTRL_VS_A3R_INHIBITOR_TREATED_MAST_CELL_UP                |                                  |                                  |           |   |   |     |
| 131                                                                | 0.5878837                        | 2.3749745                        | 0         | 0 | 0 |     |
| 1613                                                               | "tags=40%, list=11%, signal=44%" |                                  |           |   |   |     |
| GSE40274_CTRL_VS_FOXP3_AND_XBP1_TRANSDUCED_ACTIVATED_CD4_TCELL_UP  |                                  |                                  |           |   |   |     |
| GSE40274_CTRL_VS_FOXP3_AND_XBP1_TRANSDUCED_ACTIVATED_CD4_TCELL_UP  |                                  |                                  |           |   |   |     |
| 123                                                                | 0.58335656                       | 2.3714917                        | 0         | 0 |   |     |
| 0                                                                  | 1531                             | "tags=41%, list=11%, signal=46%" |           |   |   |     |
| GSE5542_IFNA_VS_IFNA_AND_IFNG_TREATED_EPITHELIAL_CELLS_24H_DN      |                                  |                                  |           |   |   |     |
| GSE5542_IFNA_VS_IFNA_AND_IFNG_TREATED_EPITHELIAL_CELLS_24H_DN      |                                  |                                  |           |   |   |     |
| 136                                                                | 0.574008                         | 2.3699253                        | 0         | 0 | 0 |     |
| 1453                                                               | "tags=34%, list=10%, signal=37%" |                                  |           |   |   |     |
| GSE40273_GATA1_KO_VS_WT_TREG_UP                                    | GSE40273_GATA1_KO_VS_WT_TREG_UP  |                                  |           |   |   |     |
| 149                                                                | 0.5645756                        | 2.3672912                        | 0         | 0 |   |     |
| 0                                                                  | 2236                             | "tags=44%, list=16%, signal=51%" |           |   |   |     |
| GSE32986_UNSTIM_VS_GMCSF_AND_CURDLAN_HIGHDOSE_STIM_DC_UP           |                                  |                                  |           |   |   |     |
| GSE32986_UNSTIM_VS_GMCSF_AND_CURDLAN_HIGHDOSE_STIM_DC_UP           |                                  |                                  |           |   |   |     |
| 142                                                                | 0.5775169                        | 2.366511                         | 0         | 0 | 0 |     |
| 2444                                                               | "tags=55%, list=17%, signal=66%" |                                  |           |   |   |     |
| GSE45365_HEALTHY_VS_MCMV_INFECTION_CD11B_DC_IFNAR_KO_DN            |                                  |                                  |           |   |   |     |
| GSE45365_HEALTHY_VS_MCMV_INFECTION_CD11B_DC_IFNAR_KO_DN            |                                  |                                  |           |   |   |     |
| 119                                                                | 0.5853258                        | 2.36568                          | 0         | 0 | 0 |     |
| 1554                                                               | "tags=29%, list=11%, signal=32%" |                                  |           |   |   |     |
| GSE22443_IL2_VS_IL12_TREATED_ACT_CD8_TCELL_DN                      |                                  |                                  |           |   |   |     |
| GSE22443_IL2_VS_IL12_TREATED_ACT_CD8_TCELL_DN                      |                                  |                                  |           |   |   | 159 |
| 0.56583136                                                         | 2.3653517                        | 0                                | 0         | 0 |   |     |
| 1950                                                               | "tags=43%, list=14%, signal=49%" |                                  |           |   |   |     |
| GSE42021_CD24LO_TREG_VS_CD24LO_TCONV_THYMUS_DN                     |                                  |                                  |           |   |   |     |
| GSE42021_CD24LO_TREG_VS_CD24LO_TCONV_THYMUS_DN                     |                                  |                                  |           |   |   | 158 |
| 0.5672348                                                          | 2.3639624                        | 0                                | 0         | 0 |   |     |
| 2848                                                               | "tags=54%, list=20%, signal=67%" |                                  |           |   |   |     |
| GSE32986_UNSTIM_VS_CURDLAN_HIGHDOSE_STIM_DC_UP                     |                                  |                                  |           |   |   |     |
| GSE32986_UNSTIM_VS_CURDLAN_HIGHDOSE_STIM_DC_UP                     |                                  |                                  |           |   |   | 156 |
| 0.56331444                                                         | 2.3626049                        | 0                                | 0         | 0 |   |     |
| 1893                                                               | "tags=43%, list=13%, signal=49%" |                                  |           |   |   |     |
| GSE37301_COMMON_LYMPHOID_PROGENITOR_VS_PRO_BCELL_DN                |                                  |                                  |           |   |   |     |

GSE37301\_COMMON\_LYMPHOID\_PROGENITOR\_VS\_PRO\_BCELL\_DN  
149 0.5640636 2.356952 0 0  
2450 "tags=46%, list=17%, signal=55%"  
GSE24634\_TEFF\_VS\_TCONV\_DAY3\_IN\_CULTURE\_UP  
GSE24634\_TEFF\_VS\_TCONV\_DAY3\_IN\_CULTURE\_UP 152  
0.5655341 2.3514094 0 0 0  
1928 "tags=44%, list=14%, signal=51%"  
GSE21670\_UNTREATED\_VS\_TGFB\_IL6\_TREATED\_STAT3\_KO\_CD4\_TCELL\_UP  
GSE21670\_UNTREATED\_VS\_TGFB\_IL6\_TREATED\_STAT3\_KO\_CD4\_TCELL\_UP  
149 0.5602451 2.3513467 0 0  
0 1597 "tags=38%, list=11%, signal=42%"  
GSE24634\_NAIVE\_CD4\_TCELL\_VS\_DAY3\_IL4\_CONV\_TREG\_DN  
GSE24634\_NAIVE\_CD4\_TCELL\_VS\_DAY3\_IL4\_CONV\_TREG\_DN 162  
0.5606628 2.3478334 0 0 0  
2315 "tags=49%, list=16%, signal=58%"  
GSE20715\_0H\_VS\_48H\_OZONE\_LUNG\_DN GSE20715\_0H\_VS\_48H\_OZONE\_LUNG\_DN  
173 0.5526912 2.346801 0 0  
1262 "tags=29%, list=9%, signal=31%"  
GSE17974\_CTRL\_VS\_ACT\_IL4\_AND\_ANTI\_IL12\_48H\_CD4\_TCELL\_DN  
GSE17974\_CTRL\_VS\_ACT\_IL4\_AND\_ANTI\_IL12\_48H\_CD4\_TCELL\_DN  
150 0.5594226 2.3413372 0 0 0  
2064 "tags=40%, list=15%, signal=46%"  
GSE3337\_CTRL\_VS\_16H\_IFNG\_IN\_CD8POS\_DC\_DN  
GSE3337\_CTRL\_VS\_16H\_IFNG\_IN\_CD8POS\_DC\_DN 154  
0.5592881 2.3381767 0 0 0  
2320 "tags=44%, list=16%, signal=51%"  
GSE23505\_IL6\_IL1\_IL23\_VS\_IL6\_IL1\_TGFB\_TREATED\_CD4\_TCELL\_DN  
GSE23505\_IL6\_IL1\_IL23\_VS\_IL6\_IL1\_TGFB\_TREATED\_CD4\_TCELL\_DN  
146 0.569462 2.3366556 0 0 0  
2271 "tags=48%, list=16%, signal=57%"  
GSE3982\_BCELL\_VS\_TH1\_DN GSE3982\_BCELL\_VS\_TH1\_DN 153  
0.5631584 2.33178 0 0 0  
1275 "tags=29%, list=9%, signal=31%"  
GSE7460\_CTRL\_VS\_TGFB\_TREATED\_ACT\_TREG\_UP  
GSE7460\_CTRL\_VS\_TGFB\_TREATED\_ACT\_TREG\_UP 139 0.569759  
2.3307245 0 0 0 2009 "tags=43%,  
list=14%, signal=50%"  
GSE22033\_UNTREATED\_VS\_MRL24\_TREATED\_MEF\_UP  
GSE22033\_UNTREATED\_VS\_MRL24\_TREATED\_MEF\_UP 150  
0.55236536 2.3229797 0 0 0  
2671 "tags=43%, list=19%, signal=53%"  
GSE21927\_GMCSF\_IL6\_VS\_GMCSF\_GCSF\_TREATED\_BONE\_MARROW\_DN  
GSE21927\_GMCSF\_IL6\_VS\_GMCSF\_GCSF\_TREATED\_BONE\_MARROW\_DN  
152 0.5591084 2.3213499 0 0 0  
2697 "tags=55%, list=19%, signal=67%"  
GSE21063\_CTRL\_VS\_ANTI\_IGM\_STIM\_BCELL\_16H\_UP  
GSE21063\_CTRL\_VS\_ANTI\_IGM\_STIM\_BCELL\_16H\_UP 146  
0.56337243 2.3184814 0 0 0  
1584 "tags=32%, list=11%, signal=36%"  
GSE32986\_UNSTIM\_VS\_GMCSF\_AND\_CURDLAN\_LOWDOSE\_STIM\_DC\_UP  
GSE32986\_UNSTIM\_VS\_GMCSF\_AND\_CURDLAN\_LOWDOSE\_STIM\_DC\_UP  
154 0.553301 2.3155882 0 0 0  
2128 "tags=43%, list=15%, signal=50%"  
GSE23505\_IL6\_IL1\_VS\_IL6\_IL1\_IL23\_TREATED\_CD4\_TCELL\_UP

GSE23505\_IL6\_IL1\_VS\_IL6\_IL1\_IL23\_TREATED\_CD4\_TCELL\_UP  
150 0.5554595 2.3117833 0 0 0  
2011 "tags=43%, list=14%, signal=49%"  
GSE10239\_MEMORY\_VS\_DAY4.5\_EFF\_CD8\_TCELL\_DN  
GSE10239\_MEMORY\_VS\_DAY4.5\_EFF\_CD8\_TCELL\_DN 140  
0.5600948 2.3105702 0 0 0  
2610 "tags=46%, list=18%, signal=56%"  
GSE24210\_CTRL\_VS\_IL35\_TREATED\_TCONV\_CD4\_TCELL\_DN  
GSE24210\_CTRL\_VS\_IL35\_TREATED\_TCONV\_CD4\_TCELL\_DN 153  
0.55258685 2.3096368 0 0 0  
1939 "tags=41%, list=14%, signal=46%"  
GSE32164\_RESTING\_DIFFERENTIATED\_VS\_ALTERNATIVELY\_ACT\_M2\_MACROPHAGE\_U  
P  
GSE32164\_RESTING\_DIFFERENTIATED\_VS\_ALTERNATIVELY\_ACT\_M2\_MACROPHAGE\_U  
P 157 0.55507356 2.3078055 0  
0 0 1023 "tags=29%, list=7%, signal=31%"  
GSE20366\_EX\_VIVO\_VS\_HOMEOSTATIC\_CONVERSION\_TREG\_DN  
GSE20366\_EX\_VIVO\_VS\_HOMEOSTATIC\_CONVERSION\_TREG\_DN 145  
0.56721026 2.3076932 0 0 0  
1564 "tags=36%, list=11%, signal=40%"  
GSE15330\_LYMPHOID\_MULTIPOTENT\_VS\_MEGAKARYOCYTE\_ERYTHROID\_PROGENITOR\_  
IKAROS\_KO\_DN  
GSE15330\_LYMPHOID\_MULTIPOTENT\_VS\_MEGAKARYOCYTE\_ERYTHROID\_PROGENITOR\_  
IKAROS\_KO\_DN 146 0.5606066 2.3069382  
0 0 0 2332 "tags=55%, list=17%, signal=65%"  
GSE3920\_UNTREATED\_VS\_IFNB\_TREATED\_ENDOTHELIAL\_CELL\_DN  
GSE3920\_UNTREATED\_VS\_IFNB\_TREATED\_ENDOTHELIAL\_CELL\_DN  
125 0.5768284 2.3048594 0 0 0  
2020 "tags=40%, list=14%, signal=46%"  
GSE36078\_WT\_VS\_IL1R\_KO\_LUNG\_DC\_AFTER\_AD5\_T425A\_HEXON\_INF\_UP  
GSE36078\_WT\_VS\_IL1R\_KO\_LUNG\_DC\_AFTER\_AD5\_T425A\_HEXON\_INF\_UP  
142 0.5621406 2.3036826 0 0 0  
2307 "tags=44%, list=16%, signal=52%"  
GSE24634\_NAIVE\_CD4\_TCELL\_VS\_DAY10\_IL4\_CONV\_TREG\_DN  
GSE24634\_NAIVE\_CD4\_TCELL\_VS\_DAY10\_IL4\_CONV\_TREG\_DN 154  
0.5597548 2.3036602 0 0 0  
2234 "tags=49%, list=16%, signal=58%"  
GSE3982\_EFF\_MEMORY\_CD4\_TCELL\_VS\_TH1\_DN  
GSE3982\_EFF\_MEMORY\_CD4\_TCELL\_VS\_TH1\_DN 153  
0.5565747 2.3021371 0 0 0  
1351 "tags=35%, list=10%, signal=39%"  
GSE26030\_TH1\_VS\_TH17\_RESTIMULATED\_DAY5\_POST\_POLARIZATION\_UP  
GSE26030\_TH1\_VS\_TH17\_RESTIMULATED\_DAY5\_POST\_POLARIZATION\_UP  
145 0.55980027 2.3019583 0 0 0  
2873 "tags=49%, list=20%, signal=61%"  
GSE29617\_CTRL\_VS\_TIV\_FLU\_VACCINE\_PBMC\_2008\_DN  
GSE29617\_CTRL\_VS\_TIV\_FLU\_VACCINE\_PBMC\_2008\_DN 134  
0.5591789 2.3012352 0 0 0  
2409 "tags=49%, list=17%, signal=58%"  
GSE29614\_DAY3\_VS\_DAY7\_TIV\_FLU\_VACCINE\_PBMC\_DN  
GSE29614\_DAY3\_VS\_DAY7\_TIV\_FLU\_VACCINE\_PBMC\_DN 121  
0.5652389 2.3002796 0 0 0  
2329 "tags=45%, list=17%, signal=54%"  
GSE26030\_TH1\_VS\_TH17\_RESTIMULATED\_DAY15\_POST\_POLARIZATION\_UP



|                                                                            |                                  |                                  |                                 |           |      |                                  |
|----------------------------------------------------------------------------|----------------------------------|----------------------------------|---------------------------------|-----------|------|----------------------------------|
| GSE26030_TH1_VS_TH17_RESTIMULATED_DAY15_POST_POLARIZATION_UP               | 143                              | 0.55522096                       | 2.2984738                       | 0         | 0    |                                  |
| 0                                                                          | 1966                             | "tags=41%, list=14%, signal=47%" |                                 |           |      |                                  |
| GSE17812_WT_VS_THPOK_KO_MEMORY_CD8_TCELL_DN                                |                                  |                                  |                                 |           |      | 154                              |
| GSE17812_WT_VS_THPOK_KO_MEMORY_CD8_TCELL_DN                                | 0.54874915                       | 2.2980886                        | 0                               | 0         | 0    |                                  |
| 1706                                                                       | "tags=40%, list=12%, signal=45%" |                                  |                                 |           |      |                                  |
| GSE1460_INTRATHYMIC_T_PROGENITOR_VS_NAIVE_CD4_TCELL_CORD_BLOOD_UP          |                                  |                                  |                                 |           |      |                                  |
| GSE1460_INTRATHYMIC_T_PROGENITOR_VS_NAIVE_CD4_TCELL_CORD_BLOOD_UP          | 154                              | 0.5517947                        | 2.2971683                       | 0         | 0    |                                  |
| 0                                                                          | 2474                             | "tags=50%, list=18%, signal=60%" |                                 |           |      |                                  |
| GSE2770_IL4_ACT_VS_ACT_CD4_TCELL_2H_UP                                     |                                  |                                  |                                 |           |      | 147                              |
| GSE2770_IL4_ACT_VS_ACT_CD4_TCELL_2H_UP                                     | 2.2951944                        | 0                                | 0                               | 0         | 2589 | 0.553723                         |
|                                                                            |                                  |                                  |                                 |           |      | "tags=53%, list=18%, signal=64%" |
| GSE22432_MULTIPOTENT_PROGENITOR_VS_CDC_DN                                  |                                  |                                  |                                 |           |      | 143                              |
| GSE22432_MULTIPOTENT_PROGENITOR_VS_CDC_DN                                  | 0.5472776                        | 2.2895255                        | 0                               | 0         | 0    |                                  |
| 1960                                                                       | "tags=38%, list=14%, signal=43%" |                                  |                                 |           |      |                                  |
| GSE2770_UNTREATED_VS_ACT_CD4_TCELL_6H_UP                                   |                                  |                                  |                                 |           |      | 148                              |
| GSE2770_UNTREATED_VS_ACT_CD4_TCELL_6H_UP                                   | 0.5502999                        | 2.2886496                        | 0                               | 0         | 0    |                                  |
| 2823                                                                       | "tags=52%, list=20%, signal=64%" |                                  |                                 |           |      |                                  |
| GSE2405_HEAT_KILLED_LYSATE_VS_LIVE_A_PHAGOCYTOPHILUM_STIM_NEUTROPHIL_9H_UP |                                  |                                  |                                 |           |      |                                  |
| GSE2405_HEAT_KILLED_LYSATE_VS_LIVE_A_PHAGOCYTOPHILUM_STIM_NEUTROPHIL_9H_UP | 0                                | 148                              | 0.5494499                       | 2.2885482 | 0    |                                  |
| 0                                                                          | 0                                | 843                              | "tags=25%, list=6%, signal=26%" |           |      |                                  |
| GSE36078_UNTREATED_VS_AD5_INF_MOUSE_LUNG_DC_DN                             |                                  |                                  |                                 |           |      | 145                              |
| GSE36078_UNTREATED_VS_AD5_INF_MOUSE_LUNG_DC_DN                             | 0.5554156                        | 2.2863178                        | 0                               | 0         | 0    |                                  |
| 2478                                                                       | "tags=54%, list=18%, signal=65%" |                                  |                                 |           |      |                                  |
| GSE40274_CTRL_VS_FOXP3_AND_LEF1_TRANSDUCE_ACTIVATED_CD4_TCELL_DN           |                                  |                                  |                                 |           |      |                                  |
| GSE40274_CTRL_VS_FOXP3_AND_LEF1_TRANSDUCE_ACTIVATED_CD4_TCELL_DN           | 131                              | 0.5583967                        | 2.2834182                       | 0         | 0    |                                  |
| 0                                                                          | 2018                             | "tags=38%, list=14%, signal=44%" |                                 |           |      |                                  |
| GSE21546_WT_VS_ELK1_KO_ANTI_CD3_STIM_DP_THYMOCYTES_DN                      |                                  |                                  |                                 |           |      |                                  |
| GSE21546_WT_VS_ELK1_KO_ANTI_CD3_STIM_DP_THYMOCYTES_DN                      | 128                              | 0.5644414                        | 2.2810006                       | 0         | 0    | 0                                |
| 1750                                                                       | "tags=38%, list=12%, signal=42%" |                                  |                                 |           |      |                                  |
| GSE16266_CTRL_VS_HEATSHOCK_AND_LPS_STIM_MEF_UP                             |                                  |                                  |                                 |           |      | 144                              |
| GSE16266_CTRL_VS_HEATSHOCK_AND_LPS_STIM_MEF_UP                             | 0.5472693                        | 2.2762184                        | 0                               | 0         | 0    |                                  |
| 2414                                                                       | "tags=50%, list=17%, signal=60%" |                                  |                                 |           |      |                                  |
| GSE10239_MEMORY_VS_KLRG1HIGH_EFF_CD8_TCELL_DN                              |                                  |                                  |                                 |           |      | 145                              |
| GSE10239_MEMORY_VS_KLRG1HIGH_EFF_CD8_TCELL_DN                              | 0.5454946                        | 2.2734468                        | 0                               | 0         | 0    |                                  |
| 2447                                                                       | "tags=42%, list=17%, signal=50%" |                                  |                                 |           |      |                                  |
| GSE15624_CTRL_VS_3H_HALOFUGINONE_TREATED_CD4_TCELL_DN                      |                                  |                                  |                                 |           |      |                                  |
| GSE15624_CTRL_VS_3H_HALOFUGINONE_TREATED_CD4_TCELL_DN                      | 130                              | 0.55617434                       | 2.273216                        | 0         | 0    |                                  |
| 1987                                                                       | "tags=39%, list=14%, signal=45%" |                                  |                                 |           |      |                                  |
| GSE6259_33D1_POS_DC_VS_CD4_TCELL_UP                                        |                                  |                                  |                                 |           |      | 138                              |
| GSE6259_33D1_POS_DC_VS_CD4_TCELL_UP                                        |                                  |                                  |                                 |           |      |                                  |

|                                                                      |                                  |                                  |           |     |
|----------------------------------------------------------------------|----------------------------------|----------------------------------|-----------|-----|
| 0.54855824                                                           | 2.2724836                        | 0                                | 0         | 0   |
| 1795                                                                 | "tags=42%, list=13%, signal=48%" |                                  |           |     |
| GSE7509_UNSTIM_VS_FCGRIIB_STIM_MONOCYTE_UP                           |                                  |                                  |           |     |
| GSE7509_UNSTIM_VS_FCGRIIB_STIM_MONOCYTE_UP                           |                                  |                                  |           | 131 |
| 0.56053907                                                           | 2.2717530                        | 0                                | 0         |     |
| 2474                                                                 | "tags=49%, list=18%, signal=59%" |                                  |           |     |
| GSE37532_TREG_VS_TCONV_CD4_TCELL_FROM_VISCERAL_ADIPOSE_TISSUE_DN     |                                  |                                  |           |     |
| GSE37532_TREG_VS_TCONV_CD4_TCELL_FROM_VISCERAL_ADIPOSE_TISSUE_DN     |                                  |                                  |           |     |
|                                                                      | 123                              | 0.5616505                        | 2.2696273 | 0 0 |
| 0                                                                    | 1545                             | "tags=37%, list=11%, signal=42%" |           |     |
| GSE3982_MEMORY_CD4_TCELL_VS_TH1_DN                                   |                                  |                                  |           |     |
| GSE3982_MEMORY_CD4_TCELL_VS_TH1_DN                                   |                                  |                                  |           | 154 |
| 0.54445636                                                           | 2.2690523                        | 0                                | 0         | 0   |
| 1342                                                                 | "tags=36%, list=10%, signal=39%" |                                  |           |     |
| GSE41867_NAIVE_VS_EFFECTOR_CD8_TCELL_UP                              |                                  |                                  |           |     |
| GSE41867_NAIVE_VS_EFFECTOR_CD8_TCELL_UP                              |                                  |                                  |           | 146 |
| 0.5458973                                                            | 2.2680647                        | 0                                | 0         | 0   |
| 2071                                                                 | "tags=40%, list=15%, signal=46%" |                                  |           |     |
| GSE26030_TH1_VS_TH17_RESTIMULATED_DAY15_POST_POLARIZATION_DN         |                                  |                                  |           |     |
| GSE26030_TH1_VS_TH17_RESTIMULATED_DAY15_POST_POLARIZATION_DN         |                                  |                                  |           |     |
|                                                                      | 139                              | 0.5516829                        | 2.2667253 | 0 0 |
| 0                                                                    | 2977                             | "tags=53%, list=21%, signal=67%" |           |     |
| GSE6259_DEC205_POS_DC_VS_CD8_TCELL_UP                                |                                  |                                  |           |     |
| GSE6259_DEC205_POS_DC_VS_CD8_TCELL_UP                                |                                  |                                  |           | 146 |
| 0.5448889                                                            | 2.2646937                        | 0                                | 0         | 0   |
| 1614                                                                 | "tags=38%, list=11%, signal=42%" |                                  |           |     |
| GSE33425_CD161_HIGH_VS_INT_CD8_TCELL_DN                              |                                  |                                  |           |     |
| GSE33425_CD161_HIGH_VS_INT_CD8_TCELL_DN                              |                                  |                                  |           | 154 |
| 0.5390908                                                            | 2.2645366                        | 0                                | 0         | 0   |
| 2103                                                                 | "tags=49%, list=15%, signal=57%" |                                  |           |     |
| GSE17580_UNINFECTED_VS_S_MANSONI_INF_TREG_DN                         |                                  |                                  |           |     |
| GSE17580_UNINFECTED_VS_S_MANSONI_INF_TREG_DN                         |                                  |                                  |           | 154 |
| 0.54731363                                                           | 2.2636428                        | 0                                | 0         | 0   |
| 1998                                                                 | "tags=48%, list=14%, signal=55%" |                                  |           |     |
| GSE41867_DAY8_VS_DAY15_LCMV_CLONE13_EFFECTOR_CD8_TCELL_DN            |                                  |                                  |           |     |
| GSE41867_DAY8_VS_DAY15_LCMV_CLONE13_EFFECTOR_CD8_TCELL_DN            |                                  |                                  |           |     |
| 147                                                                  | 0.54263335                       | 2.2618780                        | 0         | 0   |
| 1977                                                                 | "tags=43%, list=14%, signal=49%" |                                  |           |     |
| GSE42021_CD24HI_TREG_VS_CD24HI_TCONV_THYMUS_UP                       |                                  |                                  |           |     |
| GSE42021_CD24HI_TREG_VS_CD24HI_TCONV_THYMUS_UP                       |                                  |                                  |           | 156 |
| 0.54344827                                                           | 2.2591293                        | 0                                | 0         | 0   |
| 2792                                                                 | "tags=50%, list=20%, signal=62%" |                                  |           |     |
| GSE14415_ACT_TCONV_VS_ACT_NATURAL_TREG_DN                            |                                  |                                  |           |     |
| GSE14415_ACT_TCONV_VS_ACT_NATURAL_TREG_DN                            |                                  |                                  |           | 144 |
| 0.5400034                                                            | 2.2580976                        | 0                                | 0         | 0   |
| 1679                                                                 | "tags=39%, list=12%, signal=44%" |                                  |           |     |
| GSE3982_EOSINOPHIL_VS_TH1_DN                                         |                                  | GSE3982_EOSINOPHIL_VS_TH1_DN     |           |     |
|                                                                      | 139                              | 0.54390264                       | 2.2545770 | 0 0 |
| 2131                                                                 | "tags=42%, list=15%, signal=49%" |                                  |           |     |
| GSE41867_NAIVE_VS_DAY30_LCMV_ARMSTRONG_MEMORY_CD8_TCELL_DN           |                                  |                                  |           |     |
| GSE41867_NAIVE_VS_DAY30_LCMV_ARMSTRONG_MEMORY_CD8_TCELL_DN           |                                  |                                  |           |     |
| 138                                                                  | 0.5497242                        | 2.2519380                        | 0         | 0   |
| 2366                                                                 | "tags=39%, list=17%, signal=47%" |                                  |           |     |
| GSE37534_UNTREATED_VS_GW1929_TREATED_CD4_TCELL_PPARG1_AND_FOXP3_TRAS |                                  |                                  |           |     |

DUCED\_DN  
 GSE37534\_UNTREATED\_VS\_GW1929\_TREATED\_CD4\_TCELL\_PPARG1\_AND\_FOXP3\_TRAS  
 DUCED\_DN 153 0.5453345 2.251743 0 0  
 0 1570 "tags=35%, list=11%, signal=39%"  
 GSE19888\_ADENOSINE\_A3R\_ACT\_VS\_A3R\_ACT\_WITH\_A3R\_INH\_PRETREATMENT\_IN\_M  
 AST\_CELL\_UP  
 GSE19888\_ADENOSINE\_A3R\_ACT\_VS\_A3R\_ACT\_WITH\_A3R\_INH\_PRETREATMENT\_IN\_M  
 AST\_CELL\_UP 124 0.5559117 2.2510467  
 0 0 1613 "tags=40%, list=11%, signal=44%"  
 GSE17974\_2H\_VS\_72H\_UNTREATED\_IN\_VITRO\_CD4\_TCELL\_DN  
 GSE17974\_2H\_VS\_72H\_UNTREATED\_IN\_VITRO\_CD4\_TCELL\_DN 141  
 0.5491321 2.250649 0 0  
 1639 "tags=36%, list=12%, signal=41%"  
 GSE22886\_NAIVE\_VS\_IGG\_IGA\_MEMORY\_BCELL\_DN  
 GSE22886\_NAIVE\_VS\_IGG\_IGA\_MEMORY\_BCELL\_DN 144  
 0.5427474 2.2505906 0 0  
 2022 "tags=44%, list=14%, signal=51%"  
 GSE33162\_HDAC3\_KO\_VS\_HDAC3\_KO\_MACROPHAGE\_DN  
 GSE33162\_HDAC3\_KO\_VS\_HDAC3\_KO\_MACROPHAGE\_DN 146  
 0.54358447 2.240989 0 0  
 1679 "tags=42%, list=12%, signal=47%"  
 GSE7831\_1H\_VS\_4H\_CPG\_STIM\_PDC\_DN GSE7831\_1H\_VS\_4H\_CPG\_STIM\_PDC\_DN  
 147 0.5427485 2.2401748 0 0  
 0 2154 "tags=37%, list=15%, signal=44%"  
 GSE17974\_2.5H\_VS\_72H\_IL4\_AND\_ANTI\_IL12\_ACT\_CD4\_TCELL\_DN  
 GSE17974\_2.5H\_VS\_72H\_IL4\_AND\_ANTI\_IL12\_ACT\_CD4\_TCELL\_DN  
 125 0.5541741 2.2391198 0 0  
 1928 "tags=47%, list=14%, signal=54%"  
 GSE17974\_0H\_VS\_24H\_IN\_VITRO\_ACT\_CD4\_TCELL\_DN  
 GSE17974\_0H\_VS\_24H\_IN\_VITRO\_ACT\_CD4\_TCELL\_DN 137  
 0.5457666 2.2386508 0 0  
 1439 "tags=38%, list=10%, signal=42%"  
 GSE15930\_STIM\_VS\_STIM\_AND\_IFNAB\_48H\_CD8\_T\_CELL\_UP  
 GSE15930\_STIM\_VS\_STIM\_AND\_IFNAB\_48H\_CD8\_T\_CELL\_UP 156  
 0.535355 2.2359908 0 0  
 1804 "tags=44%, list=13%, signal=49%"  
 GSE25085\_FETAL\_LIVER\_VS\_FETAL\_BM\_SP4\_THYMIC\_IMPLANT\_UP  
 GSE25085\_FETAL\_LIVER\_VS\_FETAL\_BM\_SP4\_THYMIC\_IMPLANT\_UP  
 142 0.5436143 2.2351072 0 0  
 2023 "tags=42%, list=14%, signal=49%"  
 GSE17974\_1H\_VS\_72H\_UNTREATED\_IN\_VITRO\_CD4\_TCELL\_DN  
 GSE17974\_1H\_VS\_72H\_UNTREATED\_IN\_VITRO\_CD4\_TCELL\_DN 146  
 0.5465373 2.2328959 0 0  
 2519 "tags=47%, list=18%, signal=56%"  
 GSE4984\_UNTREATED\_VS\_LPS\_TREATED\_DC\_DN  
 GSE4984\_UNTREATED\_VS\_LPS\_TREATED\_DC\_DN 135  
 0.5445905 2.2319064 0 0  
 2331 "tags=47%, list=17%, signal=56%"  
 GSE40666\_UNTREATED\_VS\_IFNA\_STIM\_EFFECTOR\_CD8\_TCELL\_90MIN\_UP  
 GSE40666\_UNTREATED\_VS\_IFNA\_STIM\_EFFECTOR\_CD8\_TCELL\_90MIN\_UP  
 132 0.5486251 2.2283988 0 0  
 2036 "tags=41%, list=14%, signal=47%"  
 GSE26351\_UNSTIM\_VS\_BMP\_PATHWAY\_STIM\_HEMATOPOIETIC\_PROGENITORS\_UP  
 GSE26351\_UNSTIM\_VS\_BMP\_PATHWAY\_STIM\_HEMATOPOIETIC\_PROGENITORS\_UP

|                                                                           |                                  |                                  |                                 |   |     |
|---------------------------------------------------------------------------|----------------------------------|----------------------------------|---------------------------------|---|-----|
| 0                                                                         | 147                              | 0.53666365                       | 2.2271132                       | 0 | 0   |
| 0                                                                         | 2226                             | "tags=41%, list=16%, signal=49%" |                                 |   |     |
| GSE6674_CPG_VS_CPG_AND_ANTI_IGM_STIM_BCELL_UP                             |                                  |                                  |                                 |   | 141 |
| GSE6674_CPG_VS_CPG_AND_ANTI_IGM_STIM_BCELL_UP                             |                                  |                                  |                                 |   |     |
| 0.5437195                                                                 | 2.2256455                        | 0                                | 0                               | 0 |     |
| 2324                                                                      | "tags=48%, list=16%, signal=57%" |                                  |                                 |   |     |
| GSE9878_CTRL_VS_EBF_TRANSDUCED_PAX5_KO_PRO_BCELL_DN                       |                                  |                                  |                                 |   |     |
| GSE9878_CTRL_VS_EBF_TRANSDUCED_PAX5_KO_PRO_BCELL_DN                       |                                  |                                  |                                 |   |     |
| 156                                                                       | 0.5357059                        | 2.224478                         | 0                               | 0 |     |
| 2204                                                                      | "tags=38%, list=16%, signal=44%" |                                  |                                 |   |     |
| GSE33424_CD161_HIGH_VS_NEG_CD8_TCELL_DN                                   |                                  |                                  |                                 |   | 155 |
| GSE33424_CD161_HIGH_VS_NEG_CD8_TCELL_DN                                   |                                  |                                  |                                 |   |     |
| 0.5324388                                                                 | 2.2243009                        | 0                                | 0                               | 0 |     |
| 1811                                                                      | "tags=39%, list=13%, signal=44%" |                                  |                                 |   |     |
| GSE9239_CTRL_VS_TNF_INHIBITOR_TREATED_DC_DN                               |                                  |                                  |                                 |   |     |
| GSE9239_CTRL_VS_TNF_INHIBITOR_TREATED_DC_DN                               |                                  |                                  |                                 |   | 143 |
| 0.5439436                                                                 | 2.223532                         | 0                                | 0                               | 0 |     |
| 1534                                                                      | "tags=31%, list=11%, signal=34%" |                                  |                                 |   |     |
| GSE12845_IGD_POS_VS_NEG_BLOOD_BCELL_DN                                    |                                  |                                  |                                 |   | 141 |
| GSE12845_IGD_POS_VS_NEG_BLOOD_BCELL_DN                                    |                                  |                                  |                                 |   |     |
| 0.5416371                                                                 | 2.2194946                        | 0                                | 0                               | 0 |     |
| 2088                                                                      | "tags=42%, list=15%, signal=49%" |                                  |                                 |   |     |
| GSE21670_IL6_VS_TGFB_AND_IL6_TREATED_CD4_TCELL_DN                         |                                  |                                  |                                 |   | 142 |
| GSE21670_IL6_VS_TGFB_AND_IL6_TREATED_CD4_TCELL_DN                         |                                  |                                  |                                 |   |     |
| 0.53406113                                                                | 2.2190666                        | 0                                | 0                               | 0 |     |
| 1967                                                                      | "tags=30%, list=14%, signal=34%" |                                  |                                 |   |     |
| GSE10240_CTRL_VS_IL17_AND_IL22_STIM_PRIMARY_BRONCHIAL_EPITHELIAL_CELLS_DN |                                  |                                  |                                 |   |     |
| GSE10240_CTRL_VS_IL17_AND_IL22_STIM_PRIMARY_BRONCHIAL_EPITHELIAL_CELLS_DN |                                  |                                  |                                 |   |     |
| 0                                                                         | 149                              | 0.53610736                       | 2.2181544                       | 0 |     |
| 0                                                                         | 0                                | 924                              | "tags=21%, list=7%, signal=22%" |   |     |
| GSE3920_IFNB_VS_IFNG_TREATED_ENDOTHELIAL_CELL_DN                          |                                  |                                  |                                 |   | 132 |
| GSE3920_IFNB_VS_IFNG_TREATED_ENDOTHELIAL_CELL_DN                          |                                  |                                  |                                 |   |     |
| 0.5461136                                                                 | 2.2173955                        | 0                                | 0                               | 0 |     |
| 2012                                                                      | "tags=39%, list=14%, signal=45%" |                                  |                                 |   |     |
| GSE22886_NAIVE_BCELL_VS_BLOOD_PLASMA_CELL_DN                              |                                  |                                  |                                 |   | 149 |
| GSE22886_NAIVE_BCELL_VS_BLOOD_PLASMA_CELL_DN                              |                                  |                                  |                                 |   |     |
| 0.5327127                                                                 | 2.2167175                        | 0                                | 0                               | 0 |     |
| 2215                                                                      | "tags=42%, list=16%, signal=50%" |                                  |                                 |   |     |
| GSE40274_IRF4_VS_FOXP3_AND_IRF4_TRANSDUCED_ACTIVATED_CD4_TCELL_UP         |                                  |                                  |                                 |   |     |
| GSE40274_IRF4_VS_FOXP3_AND_IRF4_TRANSDUCED_ACTIVATED_CD4_TCELL_UP         |                                  |                                  |                                 |   |     |
| 0                                                                         | 140                              | 0.54104716                       | 2.2151437                       | 0 | 0   |
| 0                                                                         | 2586                             | "tags=47%, list=18%, signal=57%" |                                 |   |     |
| GSE36888_STAT5_AB_KNOCKIN_VS_WT_TCELL_IL2_TREATED_6H_DN                   |                                  |                                  |                                 |   |     |
| GSE36888_STAT5_AB_KNOCKIN_VS_WT_TCELL_IL2_TREATED_6H_DN                   |                                  |                                  |                                 |   |     |
| 145                                                                       | 0.53584856                       | 2.2140415                        | 0                               | 0 | 0   |
| 2029                                                                      | "tags=41%, list=14%, signal=48%" |                                  |                                 |   |     |
| GSE20500_CTRL_VS_RETINOIC_ACID_TREATED_CD4_TCELL_UP                       |                                  |                                  |                                 |   |     |
| GSE20500_CTRL_VS_RETINOIC_ACID_TREATED_CD4_TCELL_UP                       |                                  |                                  |                                 |   |     |
| 147                                                                       | 0.5295427                        | 2.2120469                        | 0                               | 0 | 0   |
| 1999                                                                      | "tags=35%, list=14%, signal=40%" |                                  |                                 |   |     |
| GSE20727_CTRL_VS_ROS_INHIBITOR_TREATED_DC_UP                              |                                  |                                  |                                 |   |     |
| GSE20727_CTRL_VS_ROS_INHIBITOR_TREATED_DC_UP                              |                                  |                                  |                                 |   | 142 |
| 0.5298261                                                                 | 2.2112331                        | 0                                | 0                               | 0 |     |

2225 "tags=40%, list=16%, signal=47%"  
 GSE36078\_UNTREATED\_VS\_AD5\_T425A\_HEXON\_INF\_MOUSE\_LUNG\_DC\_DN  
 GSE36078\_UNTREATED\_VS\_AD5\_T425A\_HEXON\_INF\_MOUSE\_LUNG\_DC\_DN  
 151 0.5372375 2.2105522 0 0 0  
 2351 "tags=44%, list=17%, signal=52%"  
 GSE41867\_NAIVE\_VS\_DAY30\_LCMV\_ARMSTRONG\_MEMORY\_CD8\_TCELL\_UP  
 GSE41867\_NAIVE\_VS\_DAY30\_LCMV\_ARMSTRONG\_MEMORY\_CD8\_TCELL\_UP  
 144 0.5327052 2.2094080 0 0  
 2725 "tags=51%, list=19%, signal=63%"  
 GSE13547\_CTRL\_VS\_ANTI\_IGM\_STIM\_BCELL\_12H\_DN  
 GSE13547\_CTRL\_VS\_ANTI\_IGM\_STIM\_BCELL\_12H\_DN 140  
 0.5430119 2.2037249 0 0 0  
 2294 "tags=49%, list=16%, signal=57%"  
 GSE9509\_LPS\_VS\_LPS\_AND\_IL10\_STIM\_IL10\_KO\_MACROPHAGE\_30MIN\_DN  
 GSE9509\_LPS\_VS\_LPS\_AND\_IL10\_STIM\_IL10\_KO\_MACROPHAGE\_30MIN\_DN  
 129 0.54299396 2.1998923 0 0  
 0 1300 "tags=29%, list=9%, signal=31%"  
 GSE2770\_UNTREATED\_VS\_IL4\_TREATED\_ACT\_CD4\_TCELL\_2H\_DN  
 GSE2770\_UNTREATED\_VS\_IL4\_TREATED\_ACT\_CD4\_TCELL\_2H\_DN  
 145 0.53576267 2.1980212 0 0 0  
 2424 "tags=44%, list=17%, signal=53%"  
 GSE2405\_0H\_VS\_24H\_A\_PHAGOCYTOPHILUM\_STIM\_NEUTROPHIL\_UP  
 GSE2405\_0H\_VS\_24H\_A\_PHAGOCYTOPHILUM\_STIM\_NEUTROPHIL\_UP  
 118 0.545167 2.1979270 0 0  
 2676 "tags=53%, list=19%, signal=64%"  
 GSE3982\_BASOPHIL\_VS\_TH1\_DN GSE3982\_BASOPHIL\_VS\_TH1\_DN  
 157 0.5258279 2.1977947 0 0  
 0 1619 "tags=31%, list=11%, signal=35%"  
 GSE23502\_WT\_VS\_HDC\_KO\_MYELOID\_DERIVED\_SUPPRESSOR\_CELL\_COLON\_TUMOR\_UP  
  
 GSE23502\_WT\_VS\_HDC\_KO\_MYELOID\_DERIVED\_SUPPRESSOR\_CELL\_COLON\_TUMOR\_UP  
 148 0.5324888 2.1968784 0  
 0 0 1064 "tags=27%, list=8%, signal=29%"  
 GSE19941\_UNSTIM\_VS\_LPS\_STIM\_IL10\_KO\_NFKBP50\_KO\_MACROPHAGE\_UP  
 GSE19941\_UNSTIM\_VS\_LPS\_STIM\_IL10\_KO\_NFKBP50\_KO\_MACROPHAGE\_UP  
 148 0.5286393 2.1952672 0 0  
 0 1300 "tags=30%, list=9%, signal=32%"  
 GSE19825\_NAIVE\_VS\_IL2RAHIGH\_DAY3\_EFF\_CD8\_TCELL\_DN  
 GSE19825\_NAIVE\_VS\_IL2RAHIGH\_DAY3\_EFF\_CD8\_TCELL\_DN 141  
 0.5280405 2.1941010 0 0  
 2525 "tags=49%, list=18%, signal=59%"  
 GSE12845\_IGD\_POS\_BLOOD\_VS\_DARKZONE\_GC\_TONSIL\_BCELL\_DN  
 GSE12845\_IGD\_POS\_BLOOD\_VS\_DARKZONE\_GC\_TONSIL\_BCELL\_DN  
 139 0.5316551 2.1935863 0 0 0  
 2102 "tags=45%, list=15%, signal=52%"  
 GSE1460\_DP\_THYMOCYTE\_VS\_NAIVE\_CD4\_TCELL\_ADULT\_BLOOD\_UP  
 GSE1460\_DP\_THYMOCYTE\_VS\_NAIVE\_CD4\_TCELL\_ADULT\_BLOOD\_UP  
 149 0.52605176 2.1863234 0 0 0  
 1833 "tags=40%, list=13%, signal=46%"  
 GSE39556\_UNTREATED\_VS\_3H\_POLYIC\_INJ\_MOUSE\_NK\_CELL\_UP  
 GSE39556\_UNTREATED\_VS\_3H\_POLYIC\_INJ\_MOUSE\_NK\_CELL\_UP  
 156 0.5257982 2.1863020 0 0  
 1251 "tags=31%, list=9%, signal=34%"  
 GSE33424\_CD161\_HIGH\_VS\_INT\_CD8\_TCELL\_DN

|                                                                           |                                  |                                  |                                  |     |
|---------------------------------------------------------------------------|----------------------------------|----------------------------------|----------------------------------|-----|
| GSE33424_CD161_HIGH_VS_INT_CD8_TCELL_DN                                   |                                  |                                  |                                  | 147 |
| 0.5290912                                                                 | 2.1833203                        | 0                                | 0                                | 0   |
| 1944                                                                      | "tags=44%, list=14%, signal=51%" |                                  |                                  |     |
| GSE10240_CTRL_VS_IL17_AND_IL22_STIM_PRIMARY_BRONCHIAL_EPITHELIAL_CELLS_UP |                                  |                                  |                                  |     |
| GSE10240_CTRL_VS_IL17_AND_IL22_STIM_PRIMARY_BRONCHIAL_EPITHELIAL_CELLS_UP | 140                              | 0.5264703                        | 2.1803515                        | 0   |
| 0                                                                         | 0                                | 1600                             | "tags=36%, list=11%, signal=40%" |     |
| GSE21927_BALBC_VS_C57BL6_MONOCYTE_TUMOR_UP                                |                                  |                                  |                                  |     |
| GSE21927_BALBC_VS_C57BL6_MONOCYTE_TUMOR_UP                                |                                  |                                  |                                  | 154 |
| 0.52483696                                                                | 2.178264                         | 0                                | 0                                | 0   |
| 2034                                                                      | "tags=40%, list=14%, signal=47%" |                                  |                                  |     |
| GSE3039_CD4_TCELL_VS_ALPHAALPHA_CD8_TCELL_DN                              |                                  |                                  |                                  |     |
| GSE3039_CD4_TCELL_VS_ALPHAALPHA_CD8_TCELL_DN                              |                                  |                                  |                                  | 145 |
| 0.5252378                                                                 | 2.176375                         | 0                                | 0                                | 0   |
| 2237                                                                      | "tags=38%, list=16%, signal=45%" |                                  |                                  |     |
| GSE22432_CDC_VS_COMMON_DC_PROGENITOR_DN                                   |                                  |                                  |                                  |     |
| GSE22432_CDC_VS_COMMON_DC_PROGENITOR_DN                                   |                                  |                                  |                                  | 150 |
| 0.5218988                                                                 | 2.175259                         | 0                                | 0                                | 0   |
| 1726                                                                      | "tags=31%, list=12%, signal=35%" |                                  |                                  |     |
| GSE22432_CONVENTIONAL_CDC_VS_PLASMACYTOID_PDC_UP                          |                                  |                                  |                                  |     |
| GSE22432_CONVENTIONAL_CDC_VS_PLASMACYTOID_PDC_UP                          |                                  |                                  |                                  | 153 |
| 0.51942015                                                                | 2.1718476                        | 0                                | 0                                | 0   |
| 2273                                                                      | "tags=41%, list=16%, signal=49%" |                                  |                                  |     |
| GSE17974_0H_VS_72H_IN_VITRO_ACT_CD4_TCELL_DN                              |                                  |                                  |                                  |     |
| GSE17974_0H_VS_72H_IN_VITRO_ACT_CD4_TCELL_DN                              |                                  |                                  |                                  | 149 |
| 0.51885384                                                                | 2.1715784                        | 0                                | 0                                | 0   |
| 1471                                                                      | "tags=33%, list=10%, signal=36%" |                                  |                                  |     |
| GSE5589_WT_VS_IL10_KO_LPS_STIM_MACROPHAGE_45MIN_UP                        |                                  |                                  |                                  |     |
| GSE5589_WT_VS_IL10_KO_LPS_STIM_MACROPHAGE_45MIN_UP                        |                                  |                                  |                                  | 123 |
| 0.5368559                                                                 | 2.1658745                        | 0                                | 0                                | 0   |
| 1865                                                                      | "tags=36%, list=13%, signal=41%" |                                  |                                  |     |
| GSE26351_WNT_VS_BMP_PATHWAY_STIM_HEMATOPOIETIC_PROGENITORS_UP             |                                  |                                  |                                  |     |
| GSE26351_WNT_VS_BMP_PATHWAY_STIM_HEMATOPOIETIC_PROGENITORS_UP             | 140                              | 0.5329395                        | 2.1638386                        | 0   |
| 0                                                                         | 2136                             | "tags=34%, list=15%, signal=40%" |                                  |     |
| GSE17186_CD21LOW_VS_CD21HIGH_TRANSITIONAL_BCELL_DN                        |                                  |                                  |                                  |     |
| GSE17186_CD21LOW_VS_CD21HIGH_TRANSITIONAL_BCELL_DN                        |                                  |                                  |                                  | 151 |
| 0.5177239                                                                 | 2.1625907                        | 0                                | 0                                | 0   |
| 2036                                                                      | "tags=38%, list=14%, signal=44%" |                                  |                                  |     |
| GSE22886_NAIVE_CD4_TCELL_VS_12H_ACT_TH1_DN                                |                                  |                                  |                                  |     |
| GSE22886_NAIVE_CD4_TCELL_VS_12H_ACT_TH1_DN                                |                                  |                                  |                                  | 158 |
| 0.51691353                                                                | 2.16165                          | 0                                | 0                                | 0   |
| 2548                                                                      | "tags=46%, list=18%, signal=56%" |                                  |                                  |     |
| GSE22432_PDC_VS_TGFB1_TREATEDCOMMON_DC_PROGENITOR_UP                      |                                  |                                  |                                  |     |
| GSE22432_PDC_VS_TGFB1_TREATEDCOMMON_DC_PROGENITOR_UP                      | 142                              | 0.5248854                        | 2.1591027                        | 0   |
| 2866                                                                      | "tags=52%, list=20%, signal=65%" |                                  |                                  |     |
| GSE39022_LN_VS_SPLEEN_DC_UP                                               |                                  |                                  |                                  |     |
| GSE39022_LN_VS_SPLEEN_DC_UP                                               | 148                              | 0.5169322                        | 2.1582758                        | 0   |
| 0                                                                         | 2449                             | "tags=39%, list=17%, signal=47%" |                                  |     |
| GSE17721_PAM3CSK4_VS_CPG_6H_BMDC_UP                                       |                                  |                                  |                                  |     |
| GSE17721_PAM3CSK4_VS_CPG_6H_BMDC_UP                                       |                                  |                                  |                                  | 145 |
| 0.5206435                                                                 | 2.1563447                        | 0                                | 0                                | 0   |

2166 "tags=38%, list=15%, signal=44%"  
 GSE21063\_3H\_VS\_16H\_ANTI\_IGM\_STIM\_NFATC1\_KOBCELL\_DN  
 GSE21063\_3H\_VS\_16H\_ANTI\_IGM\_STIM\_NFATC1\_KOBCELL\_DN 144  
 0.51956546 2.1529787 0 0 0  
 1820 "tags=31%, list=13%, signal=36%"  
 GSE17186\_NAIVE\_VS\_CD21LOW\_TRANSITIONAL\_BCELL\_CORD\_BLOOD\_DN  
 GSE17186\_NAIVE\_VS\_CD21LOW\_TRANSITIONAL\_BCELL\_CORD\_BLOOD\_DN  
 152 0.5172316 2.1524143 0 0 0  
 1949 "tags=39%, list=14%, signal=45%"  
 GSE40685\_NAIVE\_CD4\_TCELL\_VS\_FOXP3\_KO\_TREG\_PRECURSOR\_UP  
 GSE40685\_NAIVE\_CD4\_TCELL\_VS\_FOXP3\_KO\_TREG\_PRECURSOR\_UP  
 147 0.5196199 2.1516664 0 0 0  
 2718 "tags=50%, list=19%, signal=61%"  
 GSE24634\_NAIVE\_CD4\_TCELL\_VS\_DAY5\_IL4\_CONV\_TREG\_DN  
 GSE24634\_NAIVE\_CD4\_TCELL\_VS\_DAY5\_IL4\_CONV\_TREG\_DN 165  
 0.5117713 2.1508162 0 0 0  
 2474 "tags=47%, list=18%, signal=56%"  
 GSE17974\_CTRL\_VS\_ACT\_IL4\_AND\_ANTI\_IL12\_72H\_CD4\_TCELL\_DN  
 GSE17974\_CTRL\_VS\_ACT\_IL4\_AND\_ANTI\_IL12\_72H\_CD4\_TCELL\_DN  
 142 0.5215968 2.149899 0 0 0  
 1394 "tags=34%, list=10%, signal=37%"  
 GSE2585\_CD80\_HIGH\_VS\_LOW\_AIRE\_KO\_MTEC\_DN  
 GSE2585\_CD80\_HIGH\_VS\_LOW\_AIRE\_KO\_MTEC\_DN 144  
 0.5208317 2.1469872 0 0 0  
 1172 "tags=20%, list=8%, signal=22%"  
 GSE32164\_RESTING\_DIFFERENTIATED\_VS\_CMYC\_INHIBITED\_MACROPHAGE\_DN  
 GSE32164\_RESTING\_DIFFERENTIATED\_VS\_CMYC\_INHIBITED\_MACROPHAGE\_DN  
 156 0.51315606 2.1439319 0 0  
 0 2447 "tags=46%, list=17%, signal=55%"  
 GSE27434\_WT\_VS\_DNMT1\_KO\_TREG\_UP GSE27434\_WT\_VS\_DNMT1\_KO\_TREG\_UP  
 154 0.51116353 2.1433609 0 0  
 0 2792 "tags=43%, list=20%, signal=53%"  
 GSE19825\_CD24LOW\_VS\_IL2RA\_HIGH\_DAY3\_EFF\_CD8\_TCELL\_DN  
 GSE19825\_CD24LOW\_VS\_IL2RA\_HIGH\_DAY3\_EFF\_CD8\_TCELL\_DN  
 149 0.5149353 2.1431124 0 0 0  
 2410 "tags=42%, list=17%, signal=50%"  
 GSE15330\_MEGAKARYOCYTE\_ERYTHROID\_VS\_GRANULOCYTE\_MONOCYTE\_PROGENITOR\_UP  
 GSE15330\_MEGAKARYOCYTE\_ERYTHROID\_VS\_GRANULOCYTE\_MONOCYTE\_PROGENITOR\_UP  
 139 0.51957047 2.1420717 0  
 0 0 2332 "tags=49%, list=17%, signal=58%"  
 GSE8685\_IL2\_STARVED\_VS\_IL2\_ACT\_IL2\_STARVED\_CD4\_TCELL\_DN  
 GSE8685\_IL2\_STARVED\_VS\_IL2\_ACT\_IL2\_STARVED\_CD4\_TCELL\_DN  
 136 0.51619583 2.1417727 0 0 0  
 1054 "tags=24%, list=7%, signal=25%"  
 GSE17186\_CD21LOW\_VS\_CD21HIGH\_TRANSITIONAL\_BCELL\_UP  
 GSE17186\_CD21LOW\_VS\_CD21HIGH\_TRANSITIONAL\_BCELL\_UP 139  
 0.52077127 2.1412473 0 0 0  
 1468 "tags=32%, list=10%, signal=36%"  
 GSE37532\_TREG\_VS\_TCONV\_PPARG\_KO\_CD4\_TCELL\_FROM\_LN\_UP  
 GSE37532\_TREG\_VS\_TCONV\_PPARG\_KO\_CD4\_TCELL\_FROM\_LN\_UP  
 144 0.5179443 2.1398559 0 0 0  
 2476 "tags=47%, list=18%, signal=56%"  
 GSE22601\_CD4\_SINGLE\_POSITIVE\_VS\_CD8\_SINGLE\_POSITIVE\_THYMOCYTE\_UP

GSE22601\_CD4\_SINGLE\_POSITIVE\_VS\_CD8\_SINGLE\_POSITIVE\_THYMOCYTE\_UP  
146 0.5137974 2.1387684 0 0  
0 1691 "tags=38%, list=12%, signal=43%"  
GSE40666\_UNTREATED\_VS\_IFNA\_STIM\_STAT4\_KO\_EFFECTOR\_CD8\_TCELL\_90MIN\_UP  
  
GSE40666\_UNTREATED\_VS\_IFNA\_STIM\_STAT4\_KO\_EFFECTOR\_CD8\_TCELL\_90MIN\_UP  
147 0.52040356 2.138689 0 0  
0 2041 "tags=40%, list=14%, signal=46%"  
GSE22103\_UNSTIM\_VS\_GMCSF\_AND\_IFNG\_STIM\_NEUTROPHIL\_DN  
GSE22103\_UNSTIM\_VS\_GMCSF\_AND\_IFNG\_STIM\_NEUTROPHIL\_DN  
148 0.5241436 2.1373804 0 0 0  
2046 "tags=34%, list=14%, signal=40%"  
GSE5589\_LPS\_AND\_IL10\_VS\_LPS\_AND\_IL6\_STIM\_MACROPHAGE\_45MIN\_DN  
GSE5589\_LPS\_AND\_IL10\_VS\_LPS\_AND\_IL6\_STIM\_MACROPHAGE\_45MIN\_DN  
151 0.51875544 2.1346383 0 0  
0 1905 "tags=40%, list=13%, signal=46%"  
GSE3982\_MAC\_VS\_TH2\_DN GSE3982\_MAC\_VS\_TH2\_DN 134  
0.5219401 2.1333134 0 0 0  
1980 "tags=34%, list=14%, signal=40%"  
GSE22229\_RENAL\_TRANSPLANT\_VS\_HEALTHY\_PBMC\_UP  
GSE22229\_RENAL\_TRANSPLANT\_VS\_HEALTHY\_PBMC\_UP 144  
0.5123896 2.126435 0 0 0  
2174 "tags=42%, list=15%, signal=49%"  
GSE12963\_UNINF\_VS\_ENV\_AND\_NEF\_DEFICIENT\_HIV1\_INF\_CD4\_TCELL\_DN  
GSE12963\_UNINF\_VS\_ENV\_AND\_NEF\_DEFICIENT\_HIV1\_INF\_CD4\_TCELL\_DN  
111 0.5339042 2.124058 0 0  
806 "tags=23%, list=6%, signal=25%"  
GSE6259\_33D1\_POS\_DC\_VS\_BCELL\_DN GSE6259\_33D1\_POS\_DC\_VS\_BCELL\_DN  
116 0.52345395 2.1235642 0 0  
0 1899 "tags=41%, list=13%, signal=46%"  
GSE21033\_3H\_VS\_24H\_POLYIC\_STIM\_DC\_DN  
GSE21033\_3H\_VS\_24H\_POLYIC\_STIM\_DC\_DN 99  
0.54400355 2.122539 0 0  
1273 "tags=34%, list=9%, signal=37%"  
KAECH\_NAIVE\_VS\_DAY15\_EFF\_CD8\_TCELL\_DN  
KAECH\_NAIVE\_VS\_DAY15\_EFF\_CD8\_TCELL\_DN 159  
0.5102029 2.1212902 0 0 0  
2226 "tags=50%, list=16%, signal=58%"  
GSE29164\_UNTREATED\_VS\_CD8\_TCELL\_TREATED\_MELANOMA\_DAY7\_UP  
GSE29164\_UNTREATED\_VS\_CD8\_TCELL\_TREATED\_MELANOMA\_DAY7\_UP  
165 0.5134444 2.1180294 0 0 0  
1802 "tags=39%, list=13%, signal=44%"  
GSE30962\_ACUTE\_VS\_CHRONIC\_LCMV\_SECONDARY\_INF\_CD8\_TCELL\_DN  
GSE30962\_ACUTE\_VS\_CHRONIC\_LCMV\_SECONDARY\_INF\_CD8\_TCELL\_DN  
158 0.50065804 2.1124005 0 3.54E-06 0.001  
1935 "tags=39%, list=14%, signal=45%"  
GSE13411\_NAIVE\_VS\_IGM\_MEMORY\_BCELL\_DN  
GSE13411\_NAIVE\_VS\_IGM\_MEMORY\_BCELL\_DN 149  
0.5103834 2.1120665 0 3.53E-06 0.001  
2463 "tags=43%, list=17%, signal=51%"  
GSE41867\_DAY8\_EFFECTOR\_VS\_DAY30\_MEMORY\_CD8\_TCELL\_LCMV\_ARMSTRONG\_UP  
GSE41867\_DAY8\_EFFECTOR\_VS\_DAY30\_MEMORY\_CD8\_TCELL\_LCMV\_ARMSTRONG\_UP  
156 0.50589275 2.1090655 0 3.51E-06  
0.001 2294 "tags=43%, list=16%, signal=51%"



GSE3039\_CD4\_TCELL\_VS\_NKT\_CELL\_DN GSE3039\_CD4\_TCELL\_VS\_NKT\_CELL\_DN  
143 0.50824356 2.1080186 0 3.50E-06  
0.001 2158 "tags=36%, list=15%, signal=42%"  
GSE37532\_VISCERAL\_ADIPOSE\_TISSUE\_VS\_LN\_DERIVED\_PPARG\_KO\_TREG\_CD4\_TCE  
LL\_UP  
GSE37532\_VISCERAL\_ADIPOSE\_TISSUE\_VS\_LN\_DERIVED\_PPARG\_KO\_TREG\_CD4\_TCE  
LL\_UP 133 0.5157549 2.1059484 0  
3.49E-06 0.001 1804 "tags=37%, list=13%, signal=42%"  
GSE5542\_IFNG\_VS\_IFNA\_TREATED\_EPITHELIAL\_CELLS\_24H\_UP  
GSE5542\_IFNG\_VS\_IFNA\_TREATED\_EPITHELIAL\_CELLS\_24H\_UP  
141 0.5107079 2.1022608 0 3.48E-06 0.001  
2418 "tags=52%, list=17%, signal=62%"  
GSE31082\_DN\_VS\_DP\_THYMOCYTE\_UP GSE31082\_DN\_VS\_DP\_THYMOCYTE\_UP  
139 0.5104441 2.1020784 0 3.47E-06  
0.001 2455 "tags=40%, list=17%, signal=48%"  
GSE21670\_STAT3\_KO\_VS\_WT\_CD4\_TCELL\_TGFB\_IL6\_TREATED\_UP  
GSE21670\_STAT3\_KO\_VS\_WT\_CD4\_TCELL\_TGFB\_IL6\_TREATED\_UP  
138 0.5167893 2.0983474 0 3.46E-06 0.001  
2443 "tags=49%, list=17%, signal=58%"  
GSE20500\_CTRL\_VS\_RARA\_ANTAGONIST\_TREATED\_CD4\_TCELL\_DN  
GSE20500\_CTRL\_VS\_RARA\_ANTAGONIST\_TREATED\_CD4\_TCELL\_DN  
132 0.51516014 2.0982623 0 3.45E-06 0.001  
1905 "tags=35%, list=13%, signal=40%"  
GSE6674\_ANTI\_IGM\_VS\_PL2\_3\_STIM\_BCELL\_UP  
GSE6674\_ANTI\_IGM\_VS\_PL2\_3\_STIM\_BCELL\_UP 138  
0.50840986 2.0961843 0 3.44E-06 0.001  
2361 "tags=41%, list=17%, signal=48%"  
GSE11961\_UNSTIM\_VS\_ANTI\_IGM\_AND\_CD40\_STIM\_6H\_FOLLICULAR\_BCELL\_UP  
GSE11961\_UNSTIM\_VS\_ANTI\_IGM\_AND\_CD40\_STIM\_6H\_FOLLICULAR\_BCELL\_UP  
150 0.5085082 2.0957932 0 3.43E-06  
0.001 1737 "tags=35%, list=12%, signal=39%"  
GSE9006\_HEALTHY\_VS\_TYPE\_1\_DIABETES\_PBMC\_1MONTH\_POST\_DX\_UP  
GSE9006\_HEALTHY\_VS\_TYPE\_1\_DIABETES\_PBMC\_1MONTH\_POST\_DX\_UP  
144 0.51012397 2.0940366 0 3.42E-06 0.001  
2391 "tags=47%, list=17%, signal=56%"  
GSE5542\_IFNG\_VS\_IFNA\_TREATED\_EPITHELIAL\_CELLS\_6H\_UP  
GSE5542\_IFNG\_VS\_IFNA\_TREATED\_EPITHELIAL\_CELLS\_6H\_UP  
123 0.5216831 2.0929298 0 3.41E-06 0.001  
2154 "tags=41%, list=15%, signal=48%"  
GSE17721\_POLYIC\_VS\_PAM3CSK4\_12H\_BMDC\_DN  
GSE17721\_POLYIC\_VS\_PAM3CSK4\_12H\_BMDC\_DN 148  
0.5060083 2.0919604 0 3.40E-06 0.001  
2476 "tags=39%, list=18%, signal=47%"  
GSE14769\_20MIN\_VS\_360MIN\_LPS\_BMDM\_UP  
GSE14769\_20MIN\_VS\_360MIN\_LPS\_BMDM\_UP 153  
0.5010999 2.0899942 0 3.39E-06 0.001  
2243 "tags=37%, list=16%, signal=44%"  
GSE22886\_NAIVE\_CD4\_TCELL\_VS\_DC\_DN GSE22886\_NAIVE\_CD4\_TCELL\_VS\_DC\_DN  
154 0.49985042 2.0873966 0 3.38E-06  
0.001 2519 "tags=45%, list=18%, signal=55%"  
GSE24142\_ADULT\_VS\_FETAL\_EARLY\_THYMIC\_PROGENITOR\_DN  
GSE24142\_ADULT\_VS\_FETAL\_EARLY\_THYMIC\_PROGENITOR\_DN 158  
0.5034771 2.0842319 0 3.37E-06 0.001  
2258 "tags=39%, list=16%, signal=46%"

GSE7831\_CPG\_VS\_INFLUENZA\_STIM\_PDC\_4H\_DN  
GSE7831\_CPG\_VS\_INFLUENZA\_STIM\_PDC\_4H\_DN 148  
0.49993294 2.083176 0 3.36E-06 0.001  
2158 "tags=34%, list=15%, signal=39%"  
GSE12366\_GC\_BCELL\_VS\_PLASMA\_CELL\_UP  
GSE12366\_GC\_BCELL\_VS\_PLASMA\_CELL\_UP 129  
0.5086994 2.0817206 0 3.35E-06 0.001  
1898 "tags=36%, list=13%, signal=42%"  
GSE9650\_NAIVE\_VS\_MEMORY\_CD8\_TCELL\_DN  
GSE9650\_NAIVE\_VS\_MEMORY\_CD8\_TCELL\_DN 162  
0.4981238 2.0812778 0 3.34E-06 0.001  
1678 "tags=44%, list=12%, signal=50%"  
GSE22601\_DOUBLE\_POSITIVE\_VS\_CD8\_SINGLE\_POSITIVE\_THYMOCYTE\_DN  
GSE22601\_DOUBLE\_POSITIVE\_VS\_CD8\_SINGLE\_POSITIVE\_THYMOCYTE\_DN  
148 0.4952345 2.0774455 0 3.33E-06  
0.001 2274 "tags=40%, list=16%, signal=47%"  
GSE7218\_IGM\_VS\_IGG\_SIGNAL\_THROUGH\_ANTIGEN\_BCELL\_UP  
GSE7218\_IGM\_VS\_IGG\_SIGNAL\_THROUGH\_ANTIGEN\_BCELL\_UP 151  
0.4944139 2.0767467 0 3.32E-06 0.001  
1657 "tags=29%, list=12%, signal=33%"  
GSE12003\_4D\_VS\_8D\_CULTURE\_MIR223\_KO\_BM\_PROGENITOR\_DN  
GSE12003\_4D\_VS\_8D\_CULTURE\_MIR223\_KO\_BM\_PROGENITOR\_DN  
134 0.50532705 2.075477 0 3.31E-06 0.001  
2331 "tags=40%, list=17%, signal=47%"  
GSE10273\_LOW\_IL7\_VS\_HIGH\_IL7\_AND\_IRF4\_IN\_IRF4\_8\_NULL\_PRE\_BCELL\_UP  
GSE10273\_LOW\_IL7\_VS\_HIGH\_IL7\_AND\_IRF4\_IN\_IRF4\_8\_NULL\_PRE\_BCELL\_UP  
144 0.503825 2.0749407 0 3.30E-06 0.001  
2710 "tags=39%, list=19%, signal=48%"  
KAECH\_NAIVE\_VS\_MEMORY\_CD8\_TCELL\_DN  
KAECH\_NAIVE\_VS\_MEMORY\_CD8\_TCELL\_DN 162  
0.49505186 2.0744474 0 3.29E-06 0.001  
1678 "tags=45%, list=12%, signal=51%"  
GSE29164\_CD8\_TCELL\_VS\_CD8\_TCELL\_AND\_IL12\_TREATED\_MELANOMA\_DAY7\_DN  
GSE29164\_CD8\_TCELL\_VS\_CD8\_TCELL\_AND\_IL12\_TREATED\_MELANOMA\_DAY7\_DN  
121 0.51388854 2.0743377 0 3.28E-06  
0.001 1912 "tags=33%, list=14%, signal=38%"  
GSE13411\_PLASMA\_CELL\_VS\_MEMORY\_BCELL\_UP  
GSE13411\_PLASMA\_CELL\_VS\_MEMORY\_BCELL\_UP 129 0.507841  
2.0740986 0 3.27E-06 0.001 1046 "tags=25%,  
list=7%, signal=27%"  
GSE8921\_UNSTIM\_0H\_VS\_TLR1\_2\_STIM\_MONOCYTE\_12H\_UP  
GSE8921\_UNSTIM\_0H\_VS\_TLR1\_2\_STIM\_MONOCYTE\_12H\_UP 138  
0.50668305 2.0737097 0 3.26E-06 0.001  
1740 "tags=33%, list=12%, signal=37%"  
GSE10273\_HIGH\_IL7\_VS\_HIGH\_IL7\_AND\_IRF4\_IN\_IRF4\_8\_NULL\_PRE\_BCELL\_DN  
GSE10273\_HIGH\_IL7\_VS\_HIGH\_IL7\_AND\_IRF4\_IN\_IRF4\_8\_NULL\_PRE\_BCELL\_DN  
151 0.50547004 2.0730858 0 3.26E-06  
0.001 2190 "tags=37%, list=16%, signal=43%"  
GSE37563\_WT\_VS\_CTLA4\_KO\_CD4\_TCELL\_D4\_POST\_IMMUNIZATION\_DN  
GSE37563\_WT\_VS\_CTLA4\_KO\_CD4\_TCELL\_D4\_POST\_IMMUNIZATION\_DN  
150 0.49893996 2.072852 0 3.25E-06 0.001  
2349 "tags=45%, list=17%, signal=54%"  
GSE24142\_EARLY\_THYMIC\_PROGENITOR\_VS\_DN2\_THYMOCYTE\_ADULT\_DN  
GSE24142\_EARLY\_THYMIC\_PROGENITOR\_VS\_DN2\_THYMOCYTE\_ADULT\_DN

156 0.49549127 2.070647 0 3.24E-06 0.001  
1682 "tags=32%, list=12%, signal=36%"  
GSE1460\_DP\_THYMOCYTE\_VS\_NAIVE\_CD4\_TCELL\_CORD\_BLOOD\_UP  
GSE1460\_DP\_THYMOCYTE\_VS\_NAIVE\_CD4\_TCELL\_CORD\_BLOOD\_UP  
141 0.50345904 2.0701437 0 3.23E-06 0.001  
1556 "tags=34%, list=11%, signal=38%"  
GSE17721\_POLYIC\_VS\_PAM3CSK4\_24H\_BMDC\_DN  
GSE17721\_POLYIC\_VS\_PAM3CSK4\_24H\_BMDC\_DN 152  
0.5042449 2.0684428 0 3.22E-06 0.001  
1995 "tags=39%, list=14%, signal=45%"  
GSE27786\_CD4\_TCELL\_VS\_NKTCELL\_DN GSE27786\_CD4\_TCELL\_VS\_NKTCELL\_DN  
139 0.5004093 2.060685 0 3.21E-06 0.001  
2293 "tags=38%, list=16%, signal=45%"  
GSE7460\_CD8\_TCELL\_VS\_TREG\_ACT\_DN GSE7460\_CD8\_TCELL\_VS\_TREG\_ACT\_DN  
141 0.49475738 2.059832 0 3.20E-06 0.001  
1422 "tags=33%, list=10%, signal=37%"  
GSE14908\_ATOPIC\_VS\_NONATOPIC\_PATIENT\_RESTING\_CD4\_TCELL\_DN  
GSE14908\_ATOPIC\_VS\_NONATOPIC\_PATIENT\_RESTING\_CD4\_TCELL\_DN  
153 0.49209467 2.0582695 0 3.19E-06 0.001  
2804 "tags=52%, list=20%, signal=65%"  
GSE6674\_CPG\_VS\_PL2\_3\_STIM\_BCELL\_UP  
GSE6674\_CPG\_VS\_PL2\_3\_STIM\_BCELL\_UP 132  
0.5027897 2.0576847 0 3.18E-06 0.001  
1813 "tags=37%, list=13%, signal=42%"  
GSE36078\_UNTREATED\_VS\_AD5\_INF\_IL1R\_KO\_MOUSE\_LUNG\_DC\_DN  
GSE36078\_UNTREATED\_VS\_AD5\_INF\_IL1R\_KO\_MOUSE\_LUNG\_DC\_DN  
140 0.49696085 2.0571835 0 3.17E-06 0.001  
1662 "tags=28%, list=12%, signal=31%"  
GSE15271\_CXCR4\_POS\_VS\_NEG\_GC\_BCELL\_UP  
GSE15271\_CXCR4\_POS\_VS\_NEG\_GC\_BCELL\_UP 142 0.516498  
2.05691 0 3.17E-06 0.001 2519 "tags=43%, list=18%,  
signal=52%"  
GSE11057\_NAIVE\_VS\_MEMORY\_CD4\_TCELL\_DN  
GSE11057\_NAIVE\_VS\_MEMORY\_CD4\_TCELL\_DN 138  
0.49733818 2.0562015 0 3.16E-06 0.001  
2311 "tags=46%, list=16%, signal=55%"  
GSE11961\_GERMINAL\_CENTER\_BCELL\_DAY7\_VS\_GERMINAL\_CENTER\_BCELL\_DAY40\_U  
P  
GSE11961\_GERMINAL\_CENTER\_BCELL\_DAY7\_VS\_GERMINAL\_CENTER\_BCELL\_DAY40\_U  
P 148 0.4925212 2.0552225 0  
3.15E-06 0.001 1805 "tags=35%, list=13%, signal=40%"  
GSE411\_WT\_VS\_SOCS3\_KO\_MACROPHAGE\_UP  
GSE411\_WT\_VS\_SOCS3\_KO\_MACROPHAGE\_UP 148  
0.49825507 2.0546517 0 3.14E-06 0.001  
2331 "tags=45%, list=17%, signal=53%"  
GSE13522\_CTRL\_VS\_T\_CRUZI\_Y\_STRAIN\_INF\_SKIN\_IFNG\_KO\_UP  
GSE13522\_CTRL\_VS\_T\_CRUZI\_Y\_STRAIN\_INF\_SKIN\_IFNG\_KO\_UP  
128 0.50487 2.054015 0 3.13E-06 0.001  
2697 "tags=46%, list=19%, signal=56%"  
GSE25085\_FETAL\_LIVER\_VS\_ADULT\_BM\_SP4\_THYMIC\_IMPLANT\_UP  
GSE25085\_FETAL\_LIVER\_VS\_ADULT\_BM\_SP4\_THYMIC\_IMPLANT\_UP  
131 0.5004592 2.0528085 0 3.12E-06 0.001  
2175 "tags=41%, list=15%, signal=48%"  
GSE18791\_UNSTIM\_VS\_NEWCATSLE\_VIRUS\_DC\_18H\_UP

GSE18791\_UNSTIM\_VS\_NEWCATSLE\_VIRUS\_DC\_18H\_UP 149  
0.49735165 2.0524538 0 3.11E-06 0.001  
2311 "tags=42%, list=16%, signal=49%"  
GSE16522\_ANTI\_CD3CD28\_STIM\_VS\_UNSTIM\_NAIVE\_CD8\_TCELL\_DN  
GSE16522\_ANTI\_CD3CD28\_STIM\_VS\_UNSTIM\_NAIVE\_CD8\_TCELL\_DN  
152 0.49089074 2.0502486 0 3.11E-06 0.001  
2094 "tags=38%, list=15%, signal=44%"  
GSE27859\_DC\_VS\_CD11C\_INT\_F480\_HI\_MACROPHAGE\_DN  
GSE27859\_DC\_VS\_CD11C\_INT\_F480\_HI\_MACROPHAGE\_DN 119  
0.50708723 2.0474823 0 6.23E-06 0.002  
2661 "tags=37%, list=19%, signal=45%"  
GSE27859\_DC\_VS\_CD11C\_INT\_F480\_INT\_DC\_DN  
GSE27859\_DC\_VS\_CD11C\_INT\_F480\_INT\_DC\_DN 147  
0.49372488 2.0465655 0 6.22E-06 0.002  
2726 "tags=46%, list=19%, signal=57%"  
GSE2405\_HEAT\_KILLED\_VS\_LIVE\_A\_PHAGOCYTOPHILUM\_STIM\_NEUTROPHIL\_9H\_UP  
GSE2405\_HEAT\_KILLED\_VS\_LIVE\_A\_PHAGOCYTOPHILUM\_STIM\_NEUTROPHIL\_9H\_UP  
147 0.49182975 2.0459692 0 6.20E-06  
0.002 2500 "tags=45%, list=18%, signal=54%"  
GSE39110\_UNTREATED\_VS\_IL2\_TREATED\_CD8\_TCELL\_DAY6\_POST\_IMMUNIZATION\_U  
P  
GSE39110\_UNTREATED\_VS\_IL2\_TREATED\_CD8\_TCELL\_DAY6\_POST\_IMMUNIZATION\_U  
P 163 0.4848007 2.045462 0 6.18E-06  
0.002 1715 "tags=41%, list=12%, signal=46%"  
GSE9988\_ANTI\_TREM1\_VS\_ANTI\_TREM1\_AND\_LPS\_MONOCYTE\_UP  
GSE9988\_ANTI\_TREM1\_VS\_ANTI\_TREM1\_AND\_LPS\_MONOCYTE\_UP  
147 0.49255547 2.0445137 0 6.17E-06 0.002  
2851 "tags=48%, list=20%, signal=59%"  
GSE7509\_UNSTIM\_VS\_FCGRIIB\_STIM\_DC\_UP  
GSE7509\_UNSTIM\_VS\_FCGRIIB\_STIM\_DC\_UP 137  
0.50276047 2.0410087 0 6.15E-06 0.002  
1268 "tags=19%, list=9%, signal=21%"  
GSE22886\_TCELL\_VS\_BCELL\_NAIVE\_UP GSE22886\_TCELL\_VS\_BCELL\_NAIVE\_UP  
152 0.48639363 2.040706 0 6.13E-06 0.002  
2358 "tags=45%, list=17%, signal=54%"  
GSE6269\_HEALTHY\_VS\_FLU\_INF\_PBMC\_DN  
GSE6269\_HEALTHY\_VS\_FLU\_INF\_PBMC\_DN 109  
0.52277243 2.0386143 0 6.12E-06 0.002  
2442 "tags=51%, list=17%, signal=62%"  
GSE19923\_HEB\_KO\_VS\_HEB\_AND\_E2A\_KO\_DP\_THYMOCYTE\_UP  
GSE19923\_HEB\_KO\_VS\_HEB\_AND\_E2A\_KO\_DP\_THYMOCYTE\_UP 157  
0.48304236 2.0367749 0 6.10E-06 0.002  
1615 "tags=32%, list=11%, signal=36%"  
GSE36095\_WT\_VS\_HDAC9\_KO\_TREG\_UP GSE36095\_WT\_VS\_HDAC9\_KO\_TREG\_UP  
148 0.48932877 2.0362551 0 6.09E-06  
0.002 1960 "tags=37%, list=14%, signal=43%"  
GSE39820\_TGFBETA1\_IL6\_VS\_TGFBETA1\_IL6\_IL23A\_TREATED\_CD4\_TCELL\_DN  
GSE39820\_TGFBETA1\_IL6\_VS\_TGFBETA1\_IL6\_IL23A\_TREATED\_CD4\_TCELL\_DN  
139 0.49961647 2.0360928 0 6.07E-06  
0.002 2291 "tags=37%, list=16%, signal=44%"  
GSE19923\_E2A\_KO\_VS\_E2A\_AND\_HEB\_KO\_DP\_THYMOCYTE\_UP  
GSE19923\_E2A\_KO\_VS\_E2A\_AND\_HEB\_KO\_DP\_THYMOCYTE\_UP 151  
0.48960713 2.0349267 0 6.05E-06 0.002  
2085 "tags=38%, list=15%, signal=44%"

GSE9006\_TYPE\_1\_DIABETES\_AT\_DX\_VS\_1MONTH\_POST\_DX\_PBMC\_UP  
GSE9006\_TYPE\_1\_DIABETES\_AT\_DX\_VS\_1MONTH\_POST\_DX\_PBMC\_UP  
157 0.48892224 2.0346835 0 6.04E-06 0.002  
1790 "tags=36%, list=13%, signal=40%"  
GSE12003\_MIR223\_KO\_VS\_WT\_BM\_PROGENITOR\_8D\_CULTURE\_DN  
GSE12003\_MIR223\_KO\_VS\_WT\_BM\_PROGENITOR\_8D\_CULTURE\_DN  
116 0.5164812 2.0343766 0 6.02E-06 0.002  
1765 "tags=29%, list=13%, signal=33%"  
GSE21546\_SAP1A\_KO\_VS\_SAP1A\_KO\_AND\_ELK1\_KO\_DP\_THYMOCYTES\_DN  
GSE21546\_SAP1A\_KO\_VS\_SAP1A\_KO\_AND\_ELK1\_KO\_DP\_THYMOCYTES\_DN  
148 0.4943078 2.0327182 0 9.12E-06 0.003  
2344 "tags=40%, list=17%, signal=47%"  
GSE339\_EX\_VIVO\_VS\_IN\_CULTURE\_CD4POS\_DC\_UP  
GSE339\_EX\_VIVO\_VS\_IN\_CULTURE\_CD4POS\_DC\_UP 149  
0.49584392 2.0312757 0 9.10E-06 0.003  
2450 "tags=44%, list=17%, signal=53%"  
GSE43260\_BTTLA\_POS\_VS\_NEG\_INTRATUMORAL\_CD8\_TCELL\_UP  
GSE43260\_BTTLA\_POS\_VS\_NEG\_INTRATUMORAL\_CD8\_TCELL\_UP 148  
0.49057636 2.0311332 0 9.08E-06 0.003  
2222 "tags=41%, list=16%, signal=48%"  
GSE11057\_NAIVE\_VS\_EFF\_MEMORY\_CD4\_TCELL\_DN  
GSE11057\_NAIVE\_VS\_EFF\_MEMORY\_CD4\_TCELL\_DN 126  
0.49262792 2.0291781 0 9.05E-06 0.003  
1738 "tags=37%, list=12%, signal=42%"  
GSE16450\_IMMATURE\_VS\_MATURE\_NEURON\_CELL\_LINE\_DN  
GSE16450\_IMMATURE\_VS\_MATURE\_NEURON\_CELL\_LINE\_DN 144  
0.49062783 2.027763 0 1.21E-05 0.004  
1726 "tags=34%, list=12%, signal=38%"  
GSE21360\_SECONDARY\_VS\_TERTIARY\_MEMORY\_CD8\_TCELL\_UP  
GSE21360\_SECONDARY\_VS\_TERTIARY\_MEMORY\_CD8\_TCELL\_UP 153  
0.48096925 2.0249505 0 1.20E-05 0.004  
3033 "tags=52%, list=21%, signal=66%"  
GSE7218\_UNSTIM\_VS\_ANTIGEN\_STIM\_THROUGH\_IGG\_BCELL\_UP  
GSE7218\_UNSTIM\_VS\_ANTIGEN\_STIM\_THROUGH\_IGG\_BCELL\_UP  
140 0.4967213 2.024783 0 1.20E-05 0.004  
2188 "tags=33%, list=16%, signal=39%"  
GSE17301\_ACD3\_ACD28\_VS\_ACD3\_ACD28\_AND\_IFNA2\_STIM\_CD8\_TCELL\_UP  
GSE17301\_ACD3\_ACD28\_VS\_ACD3\_ACD28\_AND\_IFNA2\_STIM\_CD8\_TCELL\_UP  
142 0.48896873 2.0244975 0 1.20E-05  
0.004 1448 "tags=32%, list=10%, signal=36%"  
GSE44955\_MCSF\_VS\_MCSF\_AND\_IL27\_STIM\_MACROPHAGE\_DN  
GSE44955\_MCSF\_VS\_MCSF\_AND\_IL27\_STIM\_MACROPHAGE\_DN 135  
0.48963037 2.024221 0 1.19E-05 0.004  
1594 "tags=29%, list=11%, signal=32%"  
GSE25088\_IL4\_VS\_IL4\_AND\_ROSIGLITAZONE\_STIM\_STAT6\_KO\_MACROPHAGE\_DAY10  
\_UP  
GSE25088\_IL4\_VS\_IL4\_AND\_ROSIGLITAZONE\_STIM\_STAT6\_KO\_MACROPHAGE\_DAY10  
\_UP 128 0.50062853 2.0238788 0  
1.19E-05 0.004 2132 "tags=38%, list=15%, signal=44%"  
GSE15624\_CTRL\_VS\_6H\_HALOFUGINONE\_TREATED\_CD4\_TCELL\_DN  
GSE15624\_CTRL\_VS\_6H\_HALOFUGINONE\_TREATED\_CD4\_TCELL\_DN  
124 0.49607667 2.0223908 0 1.19E-05 0.004  
2668 "tags=42%, list=19%, signal=51%"  
GSE21360\_SECONDARY\_VS\_TERTIARY\_MEMORY\_CD8\_TCELL\_DN

GSE21360\_SECONDARY\_VS\_TERTIARY\_MEMORY\_CD8\_TCELL\_DN 130  
0.49336416 2.0223882 0 1.18E-05 0.004  
1435 "tags=29%, list=10%, signal=32%"  
GSE22601\_IMMATURE\_CD4\_SINGLE\_POSITIVE\_VS\_CD4\_SINGLE\_POSITIVE\_THYMOCY  
TE\_UP  
GSE22601\_IMMATURE\_CD4\_SINGLE\_POSITIVE\_VS\_CD4\_SINGLE\_POSITIVE\_THYMOCY  
TE\_UP 161 0.48816898 2.0218642 0  
1.18E-05 0.004 2167 "tags=42%, list=15%, signal=49%"  
GSE41867\_DAY8\_EFFECTOR\_VS\_DAY30\_EXHAUSTED\_CD8\_TCELL\_LCMV\_CLONE13\_UP  
GSE41867\_DAY8\_EFFECTOR\_VS\_DAY30\_EXHAUSTED\_CD8\_TCELL\_LCMV\_CLONE13\_UP  
147 0.49063227 2.0218525 0 1.18E-05  
0.004 2428 "tags=44%, list=17%, signal=52%"  
GSE20754\_WT\_VS\_TCF1\_KO\_MEMORY\_CD8\_TCELL\_DN  
GSE20754\_WT\_VS\_TCF1\_KO\_MEMORY\_CD8\_TCELL\_DN 132  
0.49546292 2.0210056 0 1.18E-05 0.004  
1844 "tags=38%, list=13%, signal=43%"  
GSE9037\_WT\_VS\_IRAK4\_KO\_LPS\_4H\_STIM\_BMDM\_DN  
GSE9037\_WT\_VS\_IRAK4\_KO\_LPS\_4H\_STIM\_BMDM\_DN 152  
0.4858284 2.0206285 0 1.17E-05 0.004  
2066 "tags=33%, list=15%, signal=38%"  
GSE557\_CIITA\_KO\_VS\_I\_AB\_KO\_DC\_DN GSE557\_CIITA\_KO\_VS\_I\_AB\_KO\_DC\_DN  
152 0.4850563 2.0194204 0 1.17E-05  
0.004 2581 "tags=49%, list=18%, signal=59%"  
GSE411\_UNSTIM\_VS\_400MIN\_IL6\_STIM\_SOCS3\_KO\_MACROPHAGE\_DN  
GSE411\_UNSTIM\_VS\_400MIN\_IL6\_STIM\_SOCS3\_KO\_MACROPHAGE\_DN  
148 0.48347297 2.0181472 0 1.17E-05 0.004  
2302 "tags=41%, list=16%, signal=48%"  
GSE7831\_UNSTIM\_VS\_CPG\_STIM\_PDC\_4H\_UP  
GSE7831\_UNSTIM\_VS\_CPG\_STIM\_PDC\_4H\_UP 159  
0.48228884 2.018097 0 1.16E-05 0.004  
1355 "tags=33%, list=10%, signal=36%"  
GSE22033\_UNTREATED\_VS\_ROSIGLITAZONE\_TREATED\_MEF\_UP  
GSE22033\_UNTREATED\_VS\_ROSIGLITAZONE\_TREATED\_MEF\_UP 142  
0.48947307 2.0168073 0 1.16E-05 0.004  
2127 "tags=37%, list=15%, signal=43%"  
GSE39864\_WT\_VS\_GATA3\_KO\_TREG\_DN GSE39864\_WT\_VS\_GATA3\_KO\_TREG\_DN  
139 0.48643276 2.016549 0 1.16E-05 0.004  
2669 "tags=45%, list=19%, signal=54%"  
GSE5589\_UNSTIM\_VS\_180MIN\_LPS\_STIM\_MACROPHAGE\_DN  
GSE5589\_UNSTIM\_VS\_180MIN\_LPS\_STIM\_MACROPHAGE\_DN 139  
0.4901306 2.016224 0 1.45E-05 0.005  
1893 "tags=37%, list=13%, signal=43%"  
GSE36078\_WT\_VS\_IL1R\_KO\_LUNG\_DC\_AFTER\_AD5\_INF\_UP  
GSE36078\_WT\_VS\_IL1R\_KO\_LUNG\_DC\_AFTER\_AD5\_INF\_UP 162  
0.4788029 2.01499 0 1.45E-05 0.005  
1715 "tags=39%, list=12%, signal=44%"  
GSE17721\_POLYIC\_VS\_PAM3CSK4\_8H\_BMDC\_DN  
GSE17721\_POLYIC\_VS\_PAM3CSK4\_8H\_BMDC\_DN 148  
0.4841246 2.0139976 0 1.44E-05 0.005  
1916 "tags=36%, list=14%, signal=42%"  
GSE17721\_LPS\_VS\_POLYIC\_16H\_BMDC\_UP  
GSE17721\_LPS\_VS\_POLYIC\_16H\_BMDC\_UP 155  
0.48370448 2.0062797 0 1.44E-05 0.005  
1901 "tags=35%, list=13%, signal=40%"

GSE7768\_OVA\_ALONE\_VS\_OVA\_WITH\_MPL\_IMMUNIZED\_MOUSE\_WHOLE\_SPLEEN\_6H\_UP

GSE7768\_OVA\_ALONE\_VS\_OVA\_WITH\_MPL\_IMMUNIZED\_MOUSE\_WHOLE\_SPLEEN\_6H\_UP  
146 0.48715582 2.0031958 0  
1.73E-05 0.006 1097 "tags=23%, list=8%, signal=24%"

GSE339\_EX\_VIVO\_VS\_IN\_CULTURE\_CD4CD8DN\_DC\_UP  
GSE339\_EX\_VIVO\_VS\_IN\_CULTURE\_CD4CD8DN\_DC\_UP 151  
0.48493993 2.0021853 0 1.72E-05 0.006  
2204 "tags=39%, list=16%, signal=46%"

GSE13411\_NAIVE\_VS\_MEMORY\_BCELL\_DN GSE13411\_NAIVE\_VS\_MEMORY\_BCELL\_DN  
153 0.47950014 2.0016074 0 1.72E-05  
0.006 2354 "tags=39%, list=17%, signal=46%"

GSE3920\_UNTREATED\_VS\_IFNA\_TREATED\_ENDOTHELIAL\_CELL\_DN  
GSE3920\_UNTREATED\_VS\_IFNA\_TREATED\_ENDOTHELIAL\_CELL\_DN  
137 0.48943377 2.0011213 0 1.72E-05 0.006  
2103 "tags=39%, list=15%, signal=46%"

GSE9650\_GP33\_VS\_GP276\_LCMV\_SPECIFIC\_EXHAUSTED\_CD8\_TCELL\_DN  
GSE9650\_GP33\_VS\_GP276\_LCMV\_SPECIFIC\_EXHAUSTED\_CD8\_TCELL\_DN  
151 0.48188674 1.9985553 0 1.71E-05 0.006  
2570 "tags=43%, list=18%, signal=52%"

GSE18893\_CTRL\_VS\_TNF\_TREATED\_TCONV\_2H\_UP  
GSE18893\_CTRL\_VS\_TNF\_TREATED\_TCONV\_2H\_UP 142  
0.48163432 1.998345 0 1.71E-05 0.006  
2464 "tags=42%, list=17%, signal=50%"

GSE29614\_CTRL\_VS\_TIV\_FLU\_VACCINE\_PBMC\_2007\_DN  
GSE29614\_CTRL\_VS\_TIV\_FLU\_VACCINE\_PBMC\_2007\_DN 101  
0.5077185 1.9981614 0 1.70E-05 0.006  
1413 "tags=26%, list=10%, signal=28%"

GSE22886\_NAIVE\_VS\_IGM\_MEMORY\_BCELL\_DN  
GSE22886\_NAIVE\_VS\_IGM\_MEMORY\_BCELL\_DN 145  
0.48775253 1.9978532 0 1.70E-05 0.006  
2022 "tags=39%, list=14%, signal=45%"

GSE360\_CTRL\_VS\_L\_DONOVANI\_MAC\_UP GSE360\_CTRL\_VS\_L\_DONOVANI\_MAC\_UP  
151 0.47973397 1.9976256 0 1.70E-05  
0.006 1964 "tags=36%, list=14%, signal=42%"

GSE17974\_0.5H\_VS\_72H\_IL4\_AND\_ANTI\_IL12\_ACT\_CD4\_TCELL\_DN  
GSE17974\_0.5H\_VS\_72H\_IL4\_AND\_ANTI\_IL12\_ACT\_CD4\_TCELL\_DN  
129 0.48641834 1.996479 0 1.69E-05 0.006  
1819 "tags=32%, list=13%, signal=36%"

GSE14350\_TREG\_VS\_TEFF\_IN\_IL2RB\_KO\_DN  
GSE14350\_TREG\_VS\_TEFF\_IN\_IL2RB\_KO\_DN 141  
0.4791688 1.9938678 0 1.69E-05 0.006  
2402 "tags=32%, list=17%, signal=38%"

GSE23505\_IL6\_IL1\_VS\_IL6\_IL1\_TGFB\_TREATED\_CD4\_TCELL\_DN  
GSE23505\_IL6\_IL1\_VS\_IL6\_IL1\_TGFB\_TREATED\_CD4\_TCELL\_DN  
140 0.4827984 1.9920083 0 2.24E-05 0.008  
1816 "tags=39%, list=13%, signal=45%"

GSE41867\_NAIVE\_VS\_DAY15\_LCMV\_EFFECTOR\_CD8\_TCELL\_UP  
GSE41867\_NAIVE\_VS\_DAY15\_LCMV\_EFFECTOR\_CD8\_TCELL\_UP 148  
0.48113543 1.9898667 0 2.23E-05 0.008  
2462 "tags=44%, list=17%, signal=53%"

GSE34205\_HEALTHY\_VS\_FLU\_INF\_INFANT\_PBMC\_DN  
GSE34205\_HEALTHY\_VS\_FLU\_INF\_INFANT\_PBMC\_DN 134  
0.48467776 1.9895285 0 2.23E-05 0.008

2358 "tags=43%, list=17%, signal=51%"  
 GSE39556\_CD8A\_DC\_VS\_NK\_CELL\_UP GSE39556\_CD8A\_DC\_VS\_NK\_CELL\_UP  
 159 0.47178733 1.9863707 0 2.22E-05  
 0.008 1313 "tags=25%, list=9%, signal=27%"  
 GSE27786\_NEUTROPHIL\_VS\_MONO\_MAC\_DN  
 GSE27786\_NEUTROPHIL\_VS\_MONO\_MAC\_DN 133  
 0.48653585 1.981576 0 2.22E-05 0.008  
 2266 "tags=38%, list=16%, signal=44%"  
 GSE12845\_IGD\_NEG\_BLOOD\_VS\_PRE\_GC\_TONSIL\_BCELL\_DN  
 GSE12845\_IGD\_NEG\_BLOOD\_VS\_PRE\_GC\_TONSIL\_BCELL\_DN 140  
 0.47552994 1.9807467 0 2.21E-05 0.008  
 1260 "tags=31%, list=9%, signal=33%"  
 GSE7219\_WT\_VS\_NIK\_NFKB2\_KO\_LPS\_AND\_ANTI\_CD40\_STIM\_DC\_UP  
 GSE7219\_WT\_VS\_NIK\_NFKB2\_KO\_LPS\_AND\_ANTI\_CD40\_STIM\_DC\_UP  
 156 0.48008284 1.9794075 0 2.21E-05 0.008  
 1822 "tags=28%, list=13%, signal=32%"  
 GSE24726\_WT\_VS\_E2\_22\_KO\_PDC\_DAY4\_POST\_DELETION\_DN  
 GSE24726\_WT\_VS\_E2\_22\_KO\_PDC\_DAY4\_POST\_DELETION\_DN 148  
 0.47669807 1.9783413 0 2.20E-05 0.008  
 2444 "tags=44%, list=17%, signal=53%"  
 GSE17186\_MEMORY\_VS\_CD21LOW\_TRANSITIONAL\_BCELL\_UP  
 GSE17186\_MEMORY\_VS\_CD21LOW\_TRANSITIONAL\_BCELL\_UP 151  
 0.46858168 1.9782135 0 2.20E-05 0.008  
 2151 "tags=38%, list=15%, signal=44%"  
 GSE3982\_MAST\_CELL\_VS\_TH1\_DN GSE3982\_MAST\_CELL\_VS\_TH1\_DN  
 152 0.47912443 1.9777949 0 2.19E-05  
 0.008 1837 "tags=35%, list=13%, signal=40%"  
 GSE40655\_FOXO1\_KO\_VS\_WT\_NTREG\_DN GSE40655\_FOXO1\_KO\_VS\_WT\_NTREG\_DN  
 139 0.47817516 1.9740409 0 2.19E-05  
 0.008 1365 "tags=29%, list=10%, signal=32%"  
 GSE1925\_3H\_VS\_24H\_IFNG\_STIM\_IFNG\_PRIMED\_MACROPHAGE\_DN  
 GSE1925\_3H\_VS\_24H\_IFNG\_STIM\_IFNG\_PRIMED\_MACROPHAGE\_DN  
 162 0.47149497 1.973137 0 2.18E-05 0.008  
 2350 "tags=36%, list=17%, signal=42%"  
 GSE34006\_UNTREATED\_VS\_A2AR\_AGONIST\_TREATED\_TREG\_UP  
 GSE34006\_UNTREATED\_VS\_A2AR\_AGONIST\_TREATED\_TREG\_UP 146  
 0.4719086 1.9711292 0 2.18E-05 0.008  
 2291 "tags=40%, list=16%, signal=48%"  
 GSE369\_SOCS3\_KO\_VS\_IFNG\_KO\_LIVER\_DN  
 GSE369\_SOCS3\_KO\_VS\_IFNG\_KO\_LIVER\_DN 134  
 0.48681444 1.9705576 0 2.17E-05 0.008  
 1453 "tags=29%, list=10%, signal=32%"  
 GSE3982\_NEUTROPHIL\_VS\_TH1\_DN GSE3982\_NEUTROPHIL\_VS\_TH1\_DN  
 150 0.47286713 1.9699202 0 2.17E-05  
 0.008 2016 "tags=37%, list=14%, signal=43%"  
 GSE27786\_LIN\_NEG\_VS\_NKTCELL\_UP GSE27786\_LIN\_NEG\_VS\_NKTCELL\_UP  
 150 0.47406873 1.9679489 0 2.16E-05  
 0.008 1485 "tags=23%, list=11%, signal=25%"  
 GSE5503\_MLN\_DC\_VS\_PLN\_DC\_ACTIVATED\_ALLOGENIC\_TCELL\_UP  
 GSE5503\_MLN\_DC\_VS\_PLN\_DC\_ACTIVATED\_ALLOGENIC\_TCELL\_UP  
 146 0.47841263 1.9665279 0 2.42E-05 0.009  
 1490 "tags=27%, list=11%, signal=30%"  
 GSE17974\_0H\_VS\_48H\_IN\_VITRO\_ACT\_CD4\_TCELL\_DN  
 GSE17974\_0H\_VS\_48H\_IN\_VITRO\_ACT\_CD4\_TCELL\_DN 132



0.48724815            1.9660674            0            2.42E-05 0.009  
1942    "tags=36%, list=14%, signal=42%"  
GSE5679\_PPARG\_LIGAND\_ROSIGLITAZONE\_VS\_RARA\_AGONIST\_AM580\_TREATED\_DC\_UP  
GSE5679\_PPARG\_LIGAND\_ROSIGLITAZONE\_VS\_RARA\_AGONIST\_AM580\_TREATED\_DC\_UP  
                         140            0.47542232            1.9646393            0  
2.41E-05 0.009    1990    "tags=33%, list=14%, signal=38%"  
GSE6269\_FLU\_VS\_E\_COLI\_INF\_PBMC\_UP GSE6269\_FLU\_VS\_E\_COLI\_INF\_PBMC\_UP  
                         108            0.50288916            1.9643987            0            2.40E-05  
0.009    2481    "tags=49%, list=18%, signal=59%"  
GSE3982\_EOSINOPHIL\_VS\_TH2\_DN            GSE3982\_EOSINOPHIL\_VS\_TH2\_DN  
                         145            0.47642544            1.9635074            0            2.40E-05  
0.009    2016    "tags=39%, list=14%, signal=45%"  
GSE360\_DC\_VS\_MAC\_B\_MALAYI\_LOW\_DOSE\_UP  
GSE360\_DC\_VS\_MAC\_B\_MALAYI\_LOW\_DOSE\_UP            152            0.469002  
1.9632349            0            2.39E-05 0.009    2542    "tags=39%,  
list=18%, signal=47%"  
GSE22886\_IGM\_MEMORY\_BCELL\_VS\_BLOOD\_PLASMA\_CELL\_DN  
GSE22886\_IGM\_MEMORY\_BCELL\_VS\_BLOOD\_PLASMA\_CELL\_DN            156  
0.469131 1.9625113            0            2.39E-05 0.009  
1813    "tags=37%, list=13%, signal=41%"  
GSE26912\_TUMORICIDAL\_VS\_CTRL\_MACROPHAGE\_DN  
GSE26912\_TUMORICIDAL\_VS\_CTRL\_MACROPHAGE\_DN            161  
0.4631704            1.9603925            0            2.38E-05 0.009  
1270    "tags=24%, list=9%, signal=26%"  
GSE14908\_RESTING\_VS\_HDM\_STIM\_CD4\_TCELL\_ATOPIC\_PATIENT\_UP  
GSE14908\_RESTING\_VS\_HDM\_STIM\_CD4\_TCELL\_ATOPIC\_PATIENT\_UP  
143    0.47228324            1.9594052            0            2.38E-05 0.009  
2548    "tags=43%, list=18%, signal=52%"  
GSE12845\_NAIVE\_VS\_DARKZONE\_GC\_TONSIL\_BCELL\_DN  
GSE12845\_NAIVE\_VS\_DARKZONE\_GC\_TONSIL\_BCELL\_DN            145  
0.47399792            1.9593478            0            2.37E-05 0.009  
2744    "tags=48%, list=19%, signal=59%"  
GSE29618\_BCELL\_VS\_MDC\_DN GSE29618\_BCELL\_VS\_MDC\_DN            148  
0.47520313            1.9591899            0            2.37E-05 0.009  
1775    "tags=37%, list=13%, signal=42%"  
GSE13547\_2H\_VS\_12\_H\_ANTI\_IGM\_STIM\_BCELL\_UP  
GSE13547\_2H\_VS\_12\_H\_ANTI\_IGM\_STIM\_BCELL\_UP            137  
0.4743393            1.9556162            0            2.88E-05 0.011  
456    "tags=32%, list=3%, signal=33%"  
GSE8685\_IL2\_ACT\_IL2\_STARVED\_VS\_IL21\_ACT\_IL2\_STARVED\_CD4\_TCELL\_UP  
GSE8685\_IL2\_ACT\_IL2\_STARVED\_VS\_IL21\_ACT\_IL2\_STARVED\_CD4\_TCELL\_UP  
                         133            0.48011276            1.9552706            0            2.87E-05  
0.011    1880    "tags=41%, list=13%, signal=46%"  
GSE7568\_IL4\_VS\_IL4\_AND\_TGFB\_TREATED\_MACROPHAGE\_24H\_DN  
GSE7568\_IL4\_VS\_IL4\_AND\_TGFB\_TREATED\_MACROPHAGE\_24H\_DN  
145    0.470789 1.9544473            0            2.86E-05 0.011  
2483    "tags=43%, list=18%, signal=51%"  
GSE6674\_PL2\_3\_VS\_ANTI\_IGM\_AND\_CPG\_STIM\_BCELL\_UP  
GSE6674\_PL2\_3\_VS\_ANTI\_IGM\_AND\_CPG\_STIM\_BCELL\_UP            154  
0.4687588            1.9533278            0            3.11E-05 0.012  
2672    "tags=48%, list=19%, signal=59%"  
GSE6259\_FLT3L\_INDUCED\_DEC205\_POS\_DC\_VS\_CD8\_TCELL\_DN  
GSE6259\_FLT3L\_INDUCED\_DEC205\_POS\_DC\_VS\_CD8\_TCELL\_DN

|                                                                   |                                  |                                  |                                  |          |          |
|-------------------------------------------------------------------|----------------------------------|----------------------------------|----------------------------------|----------|----------|
| 137                                                               | 0.47334504                       | 1.952782                         | 0                                | 3.10E-05 | 0.012    |
| 2320                                                              | "tags=39%, list=16%, signal=46%" |                                  |                                  |          |          |
| GSE29164_UNTREATED_VS_CD8_TCELL_AND_IL12_TREATED_MELANOMA_DAY3_DN |                                  |                                  |                                  |          |          |
| GSE29164_UNTREATED_VS_CD8_TCELL_AND_IL12_TREATED_MELANOMA_DAY3_DN | 145                              | 0.47741687                       | 1.9527074                        | 0        | 3.10E-05 |
| 0.012                                                             | 2331                             | "tags=41%, list=17%, signal=49%" |                                  |          |          |
| GSE9650_EXHAUSTED_VS_MEMORY_CD8_TCELL_DN                          |                                  |                                  |                                  |          |          |
| GSE9650_EXHAUSTED_VS_MEMORY_CD8_TCELL_DN                          |                                  |                                  |                                  | 149      |          |
| 0.46819085                                                        | 1.9525769                        | 0                                | 3.09E-05                         | 0.012    |          |
| 1835                                                              | "tags=40%, list=13%, signal=46%" |                                  |                                  |          |          |
| GSE21360_NAIVE_VS_TERTIARY_MEMORY_CD8_TCELL_DN                    |                                  |                                  |                                  |          |          |
| GSE21360_NAIVE_VS_TERTIARY_MEMORY_CD8_TCELL_DN                    |                                  |                                  |                                  |          | 140      |
| 0.47581404                                                        | 1.9519706                        | 0                                | 3.08E-05                         | 0.012    |          |
| 1786                                                              | "tags=29%, list=13%, signal=32%" |                                  |                                  |          |          |
| GSE7852_THYMUS_VS_FAT_TCONV_UP                                    |                                  |                                  |                                  |          |          |
| GSE7852_THYMUS_VS_FAT_TCONV_UP                                    | 132                              | 0.48363778                       | 1.9517785                        | 0        | 3.08E-05 |
| 0.012                                                             | 2132                             | "tags=35%, list=15%, signal=41%" |                                  |          |          |
| GSE6259_FLT3L_INDUCED_33D1_POS_DC_VS_CD4_TCELL_DN                 |                                  |                                  |                                  |          |          |
| GSE6259_FLT3L_INDUCED_33D1_POS_DC_VS_CD4_TCELL_DN                 |                                  |                                  |                                  |          | 132      |
| 0.48140943                                                        | 1.9495919                        | 0                                | 3.33E-05                         | 0.013    |          |
| 2015                                                              | "tags=37%, list=14%, signal=43%" |                                  |                                  |          |          |
| GSE25147_UNSTIM_VS_HELIOBACTER_PYLORI_LPS_STIM_MKN45_CELL_UP      |                                  |                                  |                                  |          |          |
| GSE25147_UNSTIM_VS_HELIOBACTER_PYLORI_LPS_STIM_MKN45_CELL_UP      | 131                              | 0.47547337                       | 1.9482507                        | 0        | 3.33E-05 |
| 0.013                                                             | 2828                             | "tags=40%, list=20%, signal=49%" |                                  |          |          |
| GSE1925_CTRL_VS_IFNG_PRIMED_MACROPHAGE_UP                         |                                  |                                  |                                  |          |          |
| GSE1925_CTRL_VS_IFNG_PRIMED_MACROPHAGE_UP                         |                                  |                                  |                                  | 159      |          |
| 0.47242197                                                        | 1.9468716                        | 0                                | 3.32E-05                         | 0.013    |          |
| 1513                                                              | "tags=26%, list=11%, signal=29%" |                                  |                                  |          |          |
| GSE2770_IL12_VS_IL4_TREATED_ACT_CD4_TCELL_48H_UP                  |                                  |                                  |                                  |          |          |
| GSE2770_IL12_VS_IL4_TREATED_ACT_CD4_TCELL_48H_UP                  |                                  |                                  |                                  |          | 148      |
| 0.4702994                                                         | 1.9462967                        | 0                                | 3.31E-05                         | 0.013    |          |
| 1491                                                              | "tags=29%, list=11%, signal=32%" |                                  |                                  |          |          |
| GSE22611_UNSTIM_VS_2H_MDP_STIM_MUTANT_NOD2_TRANSDUCE              |                                  |                                  |                                  |          |          |
| GSE22611_UNSTIM_VS_2H_MDP_STIM_MUTANT_NOD2_TRANSDUCE              |                                  |                                  |                                  |          |          |
| GSE22611_UNSTIM_VS_2H_MDP_STIM_MUTANT_NOD2_TRANSDUCE              | 149                              | 0.46538877                       | 1.9459195                        | 0        |          |
| 3.30E-05                                                          | 0.013                            | 2391                             | "tags=42%, list=17%, signal=50%" |          |          |
| GSE41867_NAIVE_VS_DAY8_LCMV_EFFECTOR_CD8_TCELL_UP                 |                                  |                                  |                                  |          |          |
| GSE41867_NAIVE_VS_DAY8_LCMV_EFFECTOR_CD8_TCELL_UP                 |                                  |                                  |                                  |          | 134      |
| 0.4686185                                                         | 1.9443641                        | 0                                | 3.30E-05                         | 0.013    |          |
| 2697                                                              | "tags=46%, list=19%, signal=56%" |                                  |                                  |          |          |
| GSE22886_NEUTROPHIL_VS_MONOCYTE_DN                                |                                  |                                  |                                  |          |          |
| GSE22886_NEUTROPHIL_VS_MONOCYTE_DN                                |                                  |                                  |                                  | 143      |          |
| 0.46916577                                                        | 1.9415542                        | 0                                | 3.80E-05                         | 0.015    |          |
| 2594                                                              | "tags=50%, list=18%, signal=60%" |                                  |                                  |          |          |
| GSE17974_1.5H_VS_72H_IL4_AND_ANTI_IL12_ACT_CD4_TCELL_DN           |                                  |                                  |                                  |          |          |
| GSE17974_1.5H_VS_72H_IL4_AND_ANTI_IL12_ACT_CD4_TCELL_DN           |                                  |                                  |                                  |          |          |
| 127                                                               | 0.47808987                       | 1.9400413                        | 0                                | 3.79E-05 | 0.015    |
| 2189                                                              | "tags=41%, list=16%, signal=48%" |                                  |                                  |          |          |
| GSE44649_NAIVE_VS_ACTIVATED_CD8_TCELL_DN                          |                                  |                                  |                                  |          |          |
| GSE44649_NAIVE_VS_ACTIVATED_CD8_TCELL_DN                          |                                  |                                  |                                  | 129      |          |
| 0.47784173                                                        | 1.9374014                        | 0                                | 4.04E-05                         | 0.016    |          |
| 2194                                                              | "tags=35%, list=16%, signal=41%" |                                  |                                  |          |          |

GSE16450\_CTRL\_VS\_IFNA\_12H\_STIM\_MATURE\_NEURON\_CELL\_LINE\_DN  
GSE16450\_CTRL\_VS\_IFNA\_12H\_STIM\_MATURE\_NEURON\_CELL\_LINE\_DN  
149 0.46561405 1.9370401 0 4.03E-05 0.016  
2630 "tags=43%, list=19%, signal=52%"  
GSE557\_WT\_VS\_I\_AB\_KO\_DC\_DN GSE557\_WT\_VS\_I\_AB\_KO\_DC\_DN  
133 0.48189187 1.9364685 0 4.03E-05  
0.016 2424 "tags=41%, list=17%, signal=49%"  
GSE3920\_UNTREATED\_VS\_IFNG\_TREATED\_ENDOTHELIAL\_CELL\_DN  
GSE3920\_UNTREATED\_VS\_IFNG\_TREATED\_ENDOTHELIAL\_CELL\_DN  
142 0.47080314 1.9356892 0 4.02E-05 0.016  
2337 "tags=36%, list=17%, signal=43%"  
GSE40274\_CTRL\_VS\_FOXP3\_AND\_GATA1\_TRANSDUCE\_ACTIVATED\_CD4\_TCELL\_DN  
GSE40274\_CTRL\_VS\_FOXP3\_AND\_GATA1\_TRANSDUCE\_ACTIVATED\_CD4\_TCELL\_DN  
119 0.4738535 1.9348025 0 4.26E-05  
0.017 2482 "tags=34%, list=18%, signal=40%"  
GSE17186\_BLOOD\_VS\_CORD\_BLOOD\_CD21HIGH\_TRANSITIONAL\_BCELL\_UP  
GSE17186\_BLOOD\_VS\_CORD\_BLOOD\_CD21HIGH\_TRANSITIONAL\_BCELL\_UP  
156 0.46032012 1.9336427 0 4.25E-05 0.017  
2325 "tags=42%, list=16%, signal=50%"  
GSE15735\_2H\_VS\_12H\_HDAC\_INHIBITOR\_TREATED\_CD4\_TCELL\_DN  
GSE15735\_2H\_VS\_12H\_HDAC\_INHIBITOR\_TREATED\_CD4\_TCELL\_DN  
150 0.46636367 1.9324269 0 4.24E-05 0.017  
1893 "tags=35%, list=13%, signal=40%"  
GSE15330\_LYMPHOID\_MULTIPOTENT\_VS\_GRANULOCYTE\_MONOCYTE\_PROGENITOR\_DN  
GSE15330\_LYMPHOID\_MULTIPOTENT\_VS\_GRANULOCYTE\_MONOCYTE\_PROGENITOR\_DN  
146 0.46480972 1.9309987 0 4.48E-05  
0.018 2605 "tags=44%, list=18%, signal=53%"  
GSE22886\_NAIVE\_TCELL\_VS\_NEUTROPHIL\_UP  
GSE22886\_NAIVE\_TCELL\_VS\_NEUTROPHIL\_UP 147 0.465985  
1.9301603 0 4.47E-05 0.018 1982 "tags=41%,  
list=14%, signal=47%"  
GSE3982\_DC\_VS\_TH2\_DN GSE3982\_DC\_VS\_TH2\_DN 138  
0.47501326 1.929265 0 4.46E-05 0.018  
1465 "tags=32%, list=10%, signal=35%"  
GSE3720\_UNSTIM\_VS\_PMA\_STIM\_VD1\_GAMMADELTA\_TCELL\_UP  
GSE3720\_UNSTIM\_VS\_PMA\_STIM\_VD1\_GAMMADELTA\_TCELL\_UP 129  
0.47741753 1.9262205 0 4.45E-05 0.018  
2090 "tags=43%, list=15%, signal=50%"  
GSE22045\_TREG\_VS\_TCONV\_UP GSE22045\_TREG\_VS\_TCONV\_UP 129  
0.46884978 1.9257694 0 4.69E-05 0.019  
766 "tags=17%, list=5%, signal=18%"  
GSE41978\_KLRG1\_HIGH\_VS\_LOW\_EFFECTOR\_CD8\_TCELL\_DN  
GSE41978\_KLRG1\_HIGH\_VS\_LOW\_EFFECTOR\_CD8\_TCELL\_DN 135  
0.47220197 1.9250108 0 4.93E-05 0.02  
1893 "tags=33%, list=13%, signal=37%"  
GSE11057\_NAIVE\_VS\_CENT\_MEMORY\_CD4\_TCELL\_DN  
GSE11057\_NAIVE\_VS\_CENT\_MEMORY\_CD4\_TCELL\_DN 149  
0.4626717 1.9242226 0 4.92E-05 0.02  
2311 "tags=43%, list=16%, signal=51%"  
GSE7509\_FCGR1B\_VS\_TNFA\_IL1B\_IL6\_PGE\_STIM\_DC\_UP  
GSE7509\_FCGR1B\_VS\_TNFA\_IL1B\_IL6\_PGE\_STIM\_DC\_UP 145  
0.47323352 1.9240338 0 4.91E-05 0.02  
2345 "tags=46%, list=17%, signal=54%"  
GSE5503\_MLN\_DC\_VS\_SPLEEN\_DC\_ACTIVATED\_ALLOGENIC\_TCELL\_DN

GSE5503\_MLN\_DC\_VS\_SPLEEN\_DC\_ACTIVATED\_ALLOGENIC\_TCELL\_DN  
148 0.46036765 1.9239113 0 4.90E-05 0.02  
2309 "tags=37%, list=16%, signal=44%"  
GSE18281\_SUBCAPSULAR\_CORTICAL\_REGION\_VS\_WHOLE\_MEDULLA\_THYMUS\_UP  
GSE18281\_SUBCAPSULAR\_CORTICAL\_REGION\_VS\_WHOLE\_MEDULLA\_THYMUS\_UP  
144 0.46403998 1.9230773 0 5.14E-05  
0.021 2163 "tags=26%, list=15%, signal=31%"  
GSE11961\_FOLLICULAR\_BCELL\_VS\_GERMINAL\_CENTER\_BCELL\_DAY40\_DN  
GSE11961\_FOLLICULAR\_BCELL\_VS\_GERMINAL\_CENTER\_BCELL\_DAY40\_DN  
145 0.46503294 1.9209561 0 5.37E-05 0.022  
2106 "tags=36%, list=15%, signal=42%"  
GSE17186\_NAIVE\_VS\_CD21HIGH\_TRANSITIONAL\_BCELL\_DN  
GSE17186\_NAIVE\_VS\_CD21HIGH\_TRANSITIONAL\_BCELL\_DN 151  
0.45976335 1.9198984 0 5.36E-05 0.022  
1742 "tags=30%, list=12%, signal=34%"  
GSE360\_CTRL\_VS\_M\_TUBERCULOSIS\_MAC\_UP  
GSE360\_CTRL\_VS\_M\_TUBERCULOSIS\_MAC\_UP 139  
0.4656569 1.9193932 0 5.35E-05 0.022  
1942 "tags=35%, list=14%, signal=40%"  
GSE34006\_UNTREATED\_VS\_A2AR\_AGONIST\_TREATED\_TREG\_DN  
GSE34006\_UNTREATED\_VS\_A2AR\_AGONIST\_TREATED\_TREG\_DN 163  
0.45688596 1.9167888 0 5.58E-05 0.023  
2000 "tags=37%, list=14%, signal=42%"  
GSE17721\_LPS\_VS\_GARDIQUIMOD\_24H\_BMDC\_DN  
GSE17721\_LPS\_VS\_GARDIQUIMOD\_24H\_BMDC\_DN 159  
0.45729503 1.9146867 0 5.56E-05 0.023  
1974 "tags=33%, list=14%, signal=38%"  
GSE22886\_NAIVE\_BCELL\_VS\_MONOCYTE\_DN  
GSE22886\_NAIVE\_BCELL\_VS\_MONOCYTE\_DN 155  
0.46326554 1.9140435 0 5.55E-05 0.023  
2085 "tags=41%, list=15%, signal=47%"  
GSE14308\_TH2\_VS\_TH17\_UP GSE14308\_TH2\_VS\_TH17\_UP 138  
0.47186217 1.9133608 0 5.78E-05 0.024  
2392 "tags=38%, list=17%, signal=46%"  
GSE15330\_MEGAKARYOCYTE\_ERYTHROID\_VS\_GRANULOCYTE\_MONOCYTE\_PROGENITOR\_  
IKAROS\_KO\_UP  
GSE15330\_MEGAKARYOCYTE\_ERYTHROID\_VS\_GRANULOCYTE\_MONOCYTE\_PROGENITOR\_  
IKAROS\_KO\_UP 146 0.46162105 1.9114032  
0 6.25E-05 0.026 2173 "tags=40%, list=15%, signal=46%"  
GSE22443\_NAIVE\_VS\_ACT\_AND\_IL12\_TREATED\_CD8\_TCELL\_UP  
GSE22443\_NAIVE\_VS\_ACT\_AND\_IL12\_TREATED\_CD8\_TCELL\_UP  
161 0.4610749 1.9094074 0 6.24E-05 0.026  
2104 "tags=34%, list=15%, signal=39%"  
GSE16450\_CTRL\_VS\_IFNA\_6H\_STIM\_MATURE\_NEURON\_CELL\_LINE\_DN  
GSE16450\_CTRL\_VS\_IFNA\_6H\_STIM\_MATURE\_NEURON\_CELL\_LINE\_DN  
144 0.4597654 1.9087653 0 6.23E-05 0.026  
2072 "tags=37%, list=15%, signal=43%"  
GSE21380\_TFH\_VS\_GERMINAL\_CENTER\_TFH\_CD4\_TCELL\_DN  
GSE21380\_TFH\_VS\_GERMINAL\_CENTER\_TFH\_CD4\_TCELL\_DN 137  
0.46341085 1.9077842 0 6.21E-05 0.026  
1613 "tags=24%, list=11%, signal=27%"  
GSE31082\_DN\_VS\_CD4\_SP\_THYMOCYTE\_UP  
GSE31082\_DN\_VS\_CD4\_SP\_THYMOCYTE\_UP 133  
0.47421497 1.9070151 0 6.20E-05 0.026

2221 "tags=38%, list=16%, signal=45%"  
 GSE40273\_EOS\_KO\_VS\_WT\_TREG\_UP GSE40273\_EOS\_KO\_VS\_WT\_TREG\_UP  
 154 0.45678967 1.9060503 0 6.19E-05  
 0.026 2740 "tags=50%, list=19%, signal=61%"  
 GSE17301\_CTRL\_VS\_48H\_ACD3\_ACD28\_IFNA5\_STIM\_CD8\_TCELL\_DN  
 GSE17301\_CTRL\_VS\_48H\_ACD3\_ACD28\_IFNA5\_STIM\_CD8\_TCELL\_DN  
 151 0.4631745 1.9043828 0 6.89E-05 0.029  
 792 "tags=23%, list=6%, signal=24%"  
 GSE3982\_DC\_VS\_TH1\_DN GSE3982\_DC\_VS\_TH1\_DN 156  
 0.45577127 1.9037493 0 7.11E-05 0.03  
 1672 "tags=33%, list=12%, signal=37%"  
 GSE15330\_MEGAKARYOCYTE\_ERYTHROID\_PROGENITOR\_VS\_PRO\_BCELL\_UP  
 GSE15330\_MEGAKARYOCYTE\_ERYTHROID\_PROGENITOR\_VS\_PRO\_BCELL\_UP  
 157 0.44891495 1.9028845 0 7.10E-05 0.03  
 1699 "tags=30%, list=12%, signal=34%"  
 GSE15330\_HSC\_VS\_PRO\_BCELL\_UP GSE15330\_HSC\_VS\_PRO\_BCELL\_UP  
 151 0.4543195 1.902401 0 7.08E-05 0.03  
 2630 "tags=43%, list=19%, signal=52%"  
 GSE21670\_STAT3\_KO\_VS\_WT\_CD4\_TCELL\_TGFB\_TREATED\_UP  
 GSE21670\_STAT3\_KO\_VS\_WT\_CD4\_TCELL\_TGFB\_TREATED\_UP 152  
 0.4551819 1.9019326 0 7.07E-05 0.03  
 2000 "tags=34%, list=14%, signal=39%"  
 GSE14308\_TH1\_VS\_TH17\_UP GSE14308\_TH1\_VS\_TH17\_UP 143  
 0.46207556 1.9016725 0 7.06E-05 0.03  
 1770 "tags=28%, list=13%, signal=32%"  
 GSE25123\_WT\_VS\_PPARG\_KO\_MACROPHAGE\_DN  
 GSE25123\_WT\_VS\_PPARG\_KO\_MACROPHAGE\_DN 123  
 0.46863955 1.899728 0 7.04E-05 0.03  
 2951 "tags=50%, list=21%, signal=63%"  
 GSE27786\_LSK\_VS\_LIN\_NEG\_CELL\_DN GSE27786\_LSK\_VS\_LIN\_NEG\_CELL\_DN  
 145 0.45280775 1.8985767 0 7.26E-05  
 0.031 2427 "tags=38%, list=17%, signal=45%"  
 GSE43863\_TH1\_VS\_LY6C\_LOW\_CXCR5NEG\_EFFECTOR\_CD4\_TCELL\_DN  
 GSE43863\_TH1\_VS\_LY6C\_LOW\_CXCR5NEG\_EFFECTOR\_CD4\_TCELL\_DN  
 149 0.45343548 1.8983035 0 7.25E-05 0.031  
 1817 "tags=35%, list=13%, signal=40%"  
 GSE14769\_UNSTIM\_VS\_360MIN\_LPS\_BMDM\_UP  
 GSE14769\_UNSTIM\_VS\_360MIN\_LPS\_BMDM\_UP 154  
 0.4512494 1.8977765 0 7.47E-05 0.032  
 2483 "tags=42%, list=18%, signal=50%"  
 GSE37416\_0H\_VS\_12H\_F\_TULARENSIS\_LVS\_NEUTROPHIL\_UP  
 GSE37416\_0H\_VS\_12H\_F\_TULARENSIS\_LVS\_NEUTROPHIL\_UP 128  
 0.4704533 1.8965629 0 7.91E-05 0.034  
 2712 "tags=43%, list=19%, signal=53%"  
 GSE17721\_POLYIC\_VS\_PAM3CSK4\_16H\_BMDC\_DN  
 GSE17721\_POLYIC\_VS\_PAM3CSK4\_16H\_BMDC\_DN 150  
 0.45362055 1.8962232 0 7.90E-05 0.034  
 2199 "tags=37%, list=16%, signal=44%"  
 GSE24671\_BAKIMULC\_VS\_SENDAI\_VIRUS\_INFECTED\_MOUSE\_SPLENOCYTES\_DN  
 GSE24671\_BAKIMULC\_VS\_SENDAI\_VIRUS\_INFECTED\_MOUSE\_SPLENOCYTES\_DN  
 135 0.4595001 1.891713 0 8.58E-05 0.037  
 2170 "tags=33%, list=15%, signal=39%"  
 GSE3039\_NKT\_CELL\_VS\_ALPHAALPHA\_CD8\_TCELL\_DN  
 GSE3039\_NKT\_CELL\_VS\_ALPHAALPHA\_CD8\_TCELL\_DN 149

0.46058038 1.8911915 0 8.56E-05 0.037  
2048 "tags=35%, list=15%, signal=40%"  
GSE5463\_CTRL\_VS\_DEXAMETHASONE\_TREATED\_THYMOCYTE\_UP  
GSE5463\_CTRL\_VS\_DEXAMETHASONE\_TREATED\_THYMOCYTE\_UP 151  
0.4558007 1.8911594 0 8.54E-05 0.037  
2524 "tags=44%, list=18%, signal=53%"  
GSE23321\_CD8\_STEM\_CELL\_MEMORY\_VS\_NAIVE\_CD8\_TCELL\_DN  
GSE23321\_CD8\_STEM\_CELL\_MEMORY\_VS\_NAIVE\_CD8\_TCELL\_DN  
126 0.457118 1.8902236 0 8.77E-05 0.038  
2292 "tags=41%, list=16%, signal=49%"  
GSE27786\_NKCELL\_VS\_NKTCELL\_UP GSE27786\_NKCELL\_VS\_NKTCELL\_UP  
142 0.4563652 1.8899655 0 8.75E-05  
0.038 1917 "tags=27%, list=14%, signal=31%"  
GSE5589\_IL6\_KO\_VS\_IL10\_KO\_LPS\_AND\_IL6\_STIM\_MACROPHAGE\_45MIN\_UP  
GSE5589\_IL6\_KO\_VS\_IL10\_KO\_LPS\_AND\_IL6\_STIM\_MACROPHAGE\_45MIN\_UP  
144 0.45427904 1.8885311 0 9.19E-05  
0.04 1568 "tags=29%, list=11%, signal=32%"  
GSE21033\_CTRL\_VS\_POLYIC\_STIM\_DC\_24H\_DN  
GSE21033\_CTRL\_VS\_POLYIC\_STIM\_DC\_24H\_DN 115  
0.4735898 1.8871876 0 9.40E-05 0.041  
1940 "tags=34%, list=14%, signal=39%"  
GSE27786\_CD4\_TCELL\_VS\_MONO\_MAC\_DN GSE27786\_CD4\_TCELL\_VS\_MONO\_MAC\_DN  
145 0.45096034 1.8857496 0 9.85E-05  
0.043 1388 "tags=23%, list=10%, signal=25%"  
GSE27859\_MACROPHAGE\_VS\_CD11C\_INT\_F480\_HI\_MACROPHAGE\_DN  
GSE27859\_MACROPHAGE\_VS\_CD11C\_INT\_F480\_HI\_MACROPHAGE\_DN  
134 0.45860192 1.884948 0 9.83E-05 0.043  
2373 "tags=42%, list=17%, signal=50%"  
GSE22589\_HEALTHY\_VS\_HIV\_AND\_SIV\_INFECTED\_DC\_UP  
GSE22589\_HEALTHY\_VS\_HIV\_AND\_SIV\_INFECTED\_DC\_UP 133  
0.463828 1.8840568 0 1.00E-04 0.044  
2052 "tags=36%, list=15%, signal=42%"  
GSE6259\_BCELL\_VS\_CD4\_TCELL\_UP GSE6259\_BCELL\_VS\_CD4\_TCELL\_UP  
123 0.46475846 1.8831203 0 1.00E-04  
0.044 2060 "tags=31%, list=15%, signal=36%"  
GSE8921\_UNSTIM\_VS\_TLR1\_2\_STIM\_MONOCYTE\_6H\_DN  
GSE8921\_UNSTIM\_VS\_TLR1\_2\_STIM\_MONOCYTE\_6H\_DN 135  
0.46636385 1.8800867 0 1.04E-04 0.046  
1873 "tags=31%, list=13%, signal=36%"  
GSE23114\_PERITONEAL\_CAVITY\_B1A\_BCELL\_VS\_SPLEEN\_BCELL\_DN  
GSE23114\_PERITONEAL\_CAVITY\_B1A\_BCELL\_VS\_SPLEEN\_BCELL\_DN  
150 0.4513794 1.8793433 0 1.07E-04 0.047  
2246 "tags=41%, list=16%, signal=49%"  
GSE27241\_CTRL\_VS\_DIGOXIN\_TREATED\_RORGT\_KO\_CD4\_TCELL\_IN\_TH17\_POLARIZI  
NG\_CONDITIONS\_UP  
GSE27241\_CTRL\_VS\_DIGOXIN\_TREATED\_RORGT\_KO\_CD4\_TCELL\_IN\_TH17\_POLARIZI  
NG\_CONDITIONS\_UP 127 0.45520577 1.8757708  
0 1.09E-04 0.048 1204 "tags=19%, list=9%, signal=20%"  
GSE10239\_NAIVE\_VS\_MEMORY\_CD8\_TCELL\_DN  
GSE10239\_NAIVE\_VS\_MEMORY\_CD8\_TCELL\_DN 141  
0.45610774 1.8754203 0 1.08E-04 0.048  
2138 "tags=31%, list=15%, signal=36%"  
GSE20715\_0H\_VS\_48H\_OZONE\_TLR4\_KO\_LUNG\_DN  
GSE20715\_0H\_VS\_48H\_OZONE\_TLR4\_KO\_LUNG\_DN 162

|                                                                           |                                  |                                  |                                  |          |
|---------------------------------------------------------------------------|----------------------------------|----------------------------------|----------------------------------|----------|
| 0.4428539                                                                 | 1.8739543                        | 0                                | 1.13E-04                         | 0.05     |
| 2474                                                                      | "tags=39%, list=18%, signal=47%" |                                  |                                  |          |
| GSE17721_CTRL_VS_POLYIC_1H_BMDC_UP                                        |                                  |                                  |                                  |          |
| GSE17721_CTRL_VS_POLYIC_1H_BMDC_UP                                        |                                  |                                  |                                  | 147      |
| 0.44744065                                                                | 1.8707279                        | 0                                | 1.24E-04                         | 0.055    |
| 1483                                                                      | "tags=28%, list=11%, signal=31%" |                                  |                                  |          |
| GSE32423_IL7_VS_IL4_MEMORY_CD8_TCELL_DN                                   |                                  |                                  |                                  |          |
| GSE32423_IL7_VS_IL4_MEMORY_CD8_TCELL_DN                                   |                                  |                                  |                                  | 139      |
| 0.45248365                                                                | 1.8706776                        | 0                                | 1.24E-04                         | 0.055    |
| 1472                                                                      | "tags=27%, list=10%, signal=30%" |                                  |                                  |          |
| GSE22886_NAIVE_BCELL_VS_DC_DN                                             | GSE22886_NAIVE_BCELL_VS_DC_DN    |                                  |                                  |          |
| 166                                                                       | 0.44226098                       | 1.8704512                        | 0                                | 1.23E-04 |
| 0.055                                                                     | 2121                             | "tags=38%, list=15%, signal=44%" |                                  |          |
| GSE42724_NAIVE_VS_B1_BCELL_DN                                             | GSE42724_NAIVE_VS_B1_BCELL_DN    |                                  |                                  |          |
| 123                                                                       | 0.4584758                        | 1.8699183                        | 0                                | 1.23E-04 |
| 0.055                                                                     | 2686                             | "tags=41%, list=19%, signal=50%" |                                  |          |
| GSE3039_NKT_CELL_VS_ALPHABETA_CD8_TCELL_UP                                |                                  |                                  |                                  |          |
| GSE3039_NKT_CELL_VS_ALPHABETA_CD8_TCELL_UP                                |                                  |                                  |                                  | 154      |
| 0.44461027                                                                | 1.8694190                        | 0                                | 1.23E-04                         | 0.055    |
| 2301                                                                      | "tags=36%, list=16%, signal=43%" |                                  |                                  |          |
| GSE24726_WT_VS_E2_2_KO_PDC_DAY6_POST_DELETION_UP                          |                                  |                                  |                                  |          |
| GSE24726_WT_VS_E2_2_KO_PDC_DAY6_POST_DELETION_UP                          |                                  |                                  |                                  | 136      |
| 0.46062633                                                                | 1.8685410                        | 0                                | 1.25E-04                         | 0.056    |
| 1309                                                                      | "tags=29%, list=9%, signal=32%"  |                                  |                                  |          |
| GSE37532_TREG_VS_TCONV_PPARG_KO_CD4_TCELL_FROM_VISCERAL_ADIPOSE_TISSUE_UP |                                  |                                  |                                  |          |
| GSE37532_TREG_VS_TCONV_PPARG_KO_CD4_TCELL_FROM_VISCERAL_ADIPOSE_TISSUE_UP |                                  |                                  |                                  |          |
| 145                                                                       | 0.44671726                       | 1.8663074                        | 0                                |          |
| 1.27E-04                                                                  | 0.057                            | 2520                             | "tags=43%, list=18%, signal=52%" |          |
| GSE22886_NEUTROPHIL_VS_DC_DN                                              | GSE22886_NEUTROPHIL_VS_DC_DN     |                                  |                                  |          |
| 156                                                                       | 0.44634882                       | 1.8651099                        | 0.001996008                      |          |
| 1.29E-04                                                                  | 0.058                            | 1858                             | "tags=34%, list=13%, signal=39%" |          |
| GSE13411_IGM_MEMORY_BCELL_VS_PLASMA_CELL_DN                               |                                  |                                  |                                  |          |
| GSE13411_IGM_MEMORY_BCELL_VS_PLASMA_CELL_DN                               |                                  |                                  |                                  | 142      |
| 0.44788185                                                                | 1.8642664                        | 0                                | 1.31E-04                         | 0.059    |
| 1307                                                                      | "tags=22%, list=9%, signal=24%"  |                                  |                                  |          |
| GSE3982_BASOPHIL_VS_TH2_DN                                                | GSE3982_BASOPHIL_VS_TH2_DN       |                                  |                                  |          |
| 154                                                                       | 0.4456335                        | 1.8614124                        | 0                                | 1.35E-04 |
| 0.061                                                                     | 2211                             | "tags=33%, list=16%, signal=39%" |                                  |          |
| GSE1448_CTRL_VS_ANTI_VALPHA2_DP_THYMOCYTE_UP                              |                                  |                                  |                                  |          |
| GSE1448_CTRL_VS_ANTI_VALPHA2_DP_THYMOCYTE_UP                              |                                  |                                  |                                  | 158      |
| 0.4447446                                                                 | 1.8612792                        | 0                                | 1.35E-04                         | 0.061    |
| 2151                                                                      | "tags=31%, list=15%, signal=36%" |                                  |                                  |          |
| GSE28726_ACT_CD4_TCELL_VS_ACT_VA24NEG_NKTCELL_UP                          |                                  |                                  |                                  |          |
| GSE28726_ACT_CD4_TCELL_VS_ACT_VA24NEG_NKTCELL_UP                          |                                  |                                  |                                  | 150      |
| 0.44627836                                                                | 1.8608606                        | 0                                | 1.35E-04                         | 0.061    |
| 2726                                                                      | "tags=50%, list=19%, signal=61%" |                                  |                                  |          |
| GSE10239_KLRG1INT_VS_KLRG1HIGH_EFF_CD8_TCELL_DN                           |                                  |                                  |                                  |          |
| GSE10239_KLRG1INT_VS_KLRG1HIGH_EFF_CD8_TCELL_DN                           |                                  |                                  |                                  | 145      |
| 0.44902363                                                                | 1.8594803                        | 0                                | 1.37E-04                         | 0.062    |
| 1982                                                                      | "tags=28%, list=14%, signal=32%" |                                  |                                  |          |
| GSE23321_CD8_STEM_CELL_MEMORY_VS_EFFECTOR_MEMORY_CD8_TCELL_DN             |                                  |                                  |                                  |          |
| GSE23321_CD8_STEM_CELL_MEMORY_VS_EFFECTOR_MEMORY_CD8_TCELL_DN             |                                  |                                  |                                  |          |
| 154                                                                       | 0.44414863                       | 1.8593530                        | 0                                | 1.36E-04 |
| 0.062                                                                     |                                  |                                  |                                  |          |

2121 "tags=33%, list=15%, signal=39%"  
 GSE411\_100MIN\_VS\_400MIN\_IL6\_STIM\_SOCS3\_KO\_MACROPHAGE\_UP  
 GSE411\_100MIN\_VS\_400MIN\_IL6\_STIM\_SOCS3\_KO\_MACROPHAGE\_UP  
 168 0.44191712 1.8574313 0 1.38E-04 0.063  
 2320 "tags=37%, list=16%, signal=44%"  
 GSE7509\_UNSTIM\_VS\_TNFA\_IL1B\_IL6\_PGE\_STIM\_DC\_UP  
 GSE7509\_UNSTIM\_VS\_TNFA\_IL1B\_IL6\_PGE\_STIM\_DC\_UP 161  
 0.45016292 1.8538127 0 1.53E-04 0.069  
 2262 "tags=34%, list=16%, signal=40%"  
 GSE21033\_3H\_VS\_12H\_POLYIC\_STIM\_DC\_UP  
 GSE21033\_3H\_VS\_12H\_POLYIC\_STIM\_DC\_UP 122  
 0.4577377 1.8530618 0 1.55E-04 0.07  
 1948 "tags=30%, list=14%, signal=35%"  
 GSE8835\_HEALTHY\_VS\_CLL\_CD8\_TCELL\_UP  
 GSE8835\_HEALTHY\_VS\_CLL\_CD8\_TCELL\_UP 141  
 0.4524522 1.8518717 0 1.57E-04 0.071  
 1433 "tags=29%, list=10%, signal=32%"  
 GSE8921\_UNSTIM\_VS\_TLR1\_2\_STIM\_MONOCYTE\_24H\_DN  
 GSE8921\_UNSTIM\_VS\_TLR1\_2\_STIM\_MONOCYTE\_24H\_DN 151  
 0.44719702 1.8516437 0 1.57E-04 0.071  
 2327 "tags=34%, list=16%, signal=41%"  
 GSE28726\_ACT\_CD4\_TCELL\_VS\_ACT\_NKTCELL\_UP  
 GSE28726\_ACT\_CD4\_TCELL\_VS\_ACT\_NKTCELL\_UP 146  
 0.44185716 1.8515272 0 1.57E-04 0.071  
 2202 "tags=42%, list=16%, signal=50%"  
 GSE1925\_CTRL\_VS\_24H\_IFNG\_STIM\_IFNG\_PRIMED\_MACROPHAGE\_DN  
 GSE1925\_CTRL\_VS\_24H\_IFNG\_STIM\_IFNG\_PRIMED\_MACROPHAGE\_DN  
 158 0.44033217 1.8505459 0 1.56E-04 0.071  
 1665 "tags=31%, list=12%, signal=35%"  
 GSE17721\_PAM3CSK4\_VS\_GADIQUIMOD\_6H\_BMDC\_UP  
 GSE17721\_PAM3CSK4\_VS\_GADIQUIMOD\_6H\_BMDC\_UP 143  
 0.4528801 1.8492497 0 1.58E-04 0.072  
 2107 "tags=34%, list=15%, signal=40%"  
 GSE11864\_CSF1\_VS\_CSF1\_IFNG\_IN\_MAC\_DN  
 GSE11864\_CSF1\_VS\_CSF1\_IFNG\_IN\_MAC\_DN 125  
 0.45601463 1.8487524 0 1.60E-04 0.072  
 2283 "tags=33%, list=16%, signal=39%"  
 GSE24574\_NAIVE\_VS\_TCONV\_CD4\_TCELL\_DN  
 GSE24574\_NAIVE\_VS\_TCONV\_CD4\_TCELL\_DN 145  
 0.4480858 1.8485037 0 1.60E-04 0.072  
 2202 "tags=41%, list=16%, signal=49%"  
 GSE13485\_DAY1\_VS\_DAY21\_YF17D\_VACCINE\_PBMC\_DN  
 GSE13485\_DAY1\_VS\_DAY21\_YF17D\_VACCINE\_PBMC\_DN 129  
 0.4554276 1.8479152 0 1.59E-04 0.072  
 2427 "tags=44%, list=17%, signal=53%"  
 GSE12839\_CTRL\_VS\_IL12\_TREATED\_PBMC\_UP  
 GSE12839\_CTRL\_VS\_IL12\_TREATED\_PBMC\_UP 115 0.460717  
 1.8476256 0 1.59E-04 0.072 1639 "tags=27%,  
 list=12%, signal=30%"  
 GSE2770\_IL12\_ACT\_VS\_ACT\_CD4\_TCELL\_48H\_DN  
 GSE2770\_IL12\_ACT\_VS\_ACT\_CD4\_TCELL\_48H\_DN 138  
 0.45599824 1.8475797 0 1.59E-04 0.072  
 2005 "tags=33%, list=14%, signal=38%"  
 GSE22432\_MULTIPOTENT\_VS\_COMMON\_DC\_PROGENITOR\_UP



GSE22432\_MULTIPOTENT\_VS\_COMMON\_DC\_PROGENITOR\_UP 143  
0.4467142 1.8473736 0 1.58E-04 0.072  
2595 "tags=38%, list=18%, signal=46%"  
GSE27786\_NKTCELL\_VS\_MONO\_MAC\_DN GSE27786\_NKTCELL\_VS\_MONO\_MAC\_DN  
145 0.44482738 1.8472195 0 1.58E-04  
0.072 1106 "tags=19%, list=8%, signal=20%"  
GSE7831\_UNSTIM\_VS\_CPG\_STIM\_PDC\_1H\_UP  
GSE7831\_UNSTIM\_VS\_CPG\_STIM\_PDC\_1H\_UP 148  
0.44166803 1.846844 0 1.58E-04 0.072  
2163 "tags=41%, list=15%, signal=47%"  
GSE17721\_LPS\_VS\_PAM3CSK4\_1H\_BMDC\_UP  
GSE17721\_LPS\_VS\_PAM3CSK4\_1H\_BMDC\_UP 141  
0.45064592 1.8466896 0 1.58E-04 0.072  
2416 "tags=35%, list=17%, signal=42%"  
GSE360\_CTRL\_VS\_B\_MALAYI\_HIGH\_DOSE\_MAC\_UP  
GSE360\_CTRL\_VS\_B\_MALAYI\_HIGH\_DOSE\_MAC\_UP 147  
0.4459504 1.8455501 0.00203666 1.62E-04 0.074  
3085 "tags=40%, list=22%, signal=51%"  
GSE41978\_ID2\_K0\_VS\_ID2\_K0\_AND\_BIM\_K0\_KLRG1\_LOW\_EFFECTOR\_CD8\_TCELL\_DN  
  
GSE41978\_ID2\_K0\_VS\_ID2\_K0\_AND\_BIM\_K0\_KLRG1\_LOW\_EFFECTOR\_CD8\_TCELL\_DN  
132 0.4527199 1.8448008 0  
1.65E-04 0.076 2855 "tags=45%, list=20%, signal=56%"  
GSE5679\_PPARG\_LIGAND\_ROSIGLITAZONE\_VS\_ROSIGLITAZONE\_AND\_RARA\_AGNONIST  
\_AM580\_TREATED\_DC\_UP  
GSE5679\_PPARG\_LIGAND\_ROSIGLITAZONE\_VS\_ROSIGLITAZONE\_AND\_RARA\_AGNONIST  
\_AM580\_TREATED\_DC\_UP 151 0.44471213  
1.8445544 0 1.65E-04 0.076 2128 "tags=38%,  
list=15%, signal=45%"  
GSE17721\_CTRL\_VS\_POLYIC\_12H\_BMDC\_UP  
GSE17721\_CTRL\_VS\_POLYIC\_12H\_BMDC\_UP 149  
0.44482696 1.8443191 0 1.69E-04 0.078  
2347 "tags=37%, list=17%, signal=44%"  
GSE21670\_STAT3\_K0\_VS\_WT\_CD4\_TCELL\_TGFB\_TREATED\_DN  
GSE21670\_STAT3\_K0\_VS\_WT\_CD4\_TCELL\_TGFB\_TREATED\_DN 141  
0.4516246 1.8426715 0 1.75E-04 0.081  
1439 "tags=16%, list=10%, signal=17%"  
GSE22432\_MULTIPOTENT\_PROGENITOR\_VS\_PDC\_DN  
GSE22432\_MULTIPOTENT\_PROGENITOR\_VS\_PDC\_DN 146  
0.4403504 1.8420082 0 1.77E-04 0.082  
1821 "tags=30%, list=13%, signal=34%"  
GSE19401\_PAM2CSK4\_VS\_RETINOIC\_ACID\_STIM\_FOLLICULAR\_DC\_UP  
GSE19401\_PAM2CSK4\_VS\_RETINOIC\_ACID\_STIM\_FOLLICULAR\_DC\_UP  
135 0.45551133 1.8418813 0 1.77E-04 0.082  
2089 "tags=33%, list=15%, signal=38%"  
GSE2770\_UNTREATED\_VS\_IL4\_TREATED\_ACT\_CD4\_TCELL\_2H\_UP  
GSE2770\_UNTREATED\_VS\_IL4\_TREATED\_ACT\_CD4\_TCELL\_2H\_UP  
151 0.4436434 1.839876 0 1.81E-04 0.084  
895 "tags=23%, list=6%, signal=24%"  
GSE2770\_IL12\_AND\_TGFB\_ACT\_VS\_ACT\_CD4\_TCELL\_6H\_DN  
GSE2770\_IL12\_AND\_TGFB\_ACT\_VS\_ACT\_CD4\_TCELL\_6H\_DN 154  
0.44413495 1.8386917 0 1.84E-04 0.086  
1784 "tags=38%, list=13%, signal=43%"  
GSE12845\_IGD\_NEG\_BLOOD\_VS\_DARKZONE\_GC\_TONSIL\_BCELL\_DN

GSE12845\_IGD\_NEG\_BLOOD\_VS\_DARKZONE\_GC\_TONSIL\_BCELL\_DN  
143 0.44413707 1.8385892 0 1.84E-04 0.086  
2047 "tags=37%, list=15%, signal=43%"  
GSE24142\_EARLY\_THYMIC\_PROGENITOR\_VS\_DN2\_THYMOCYTE\_DN  
GSE24142\_EARLY\_THYMIC\_PROGENITOR\_VS\_DN2\_THYMOCYTE\_DN  
166 0.44034836 1.8383491 0 1.84E-04 0.086  
1195 "tags=25%, list=8%, signal=27%"  
GSE360\_CTRL\_VS\_L\_MAJOR\_MAC\_UP GSE360\_CTRL\_VS\_L\_MAJOR\_MAC\_UP  
156 0.43786082 1.8377931 0 1.86E-04  
0.087 2532 "tags=37%, list=18%, signal=45%"  
GSE1925\_CTRL\_VS\_IFNG\_PRIMED\_MACROPHAGE\_24H\_IFNG\_STIM\_DN  
GSE1925\_CTRL\_VS\_IFNG\_PRIMED\_MACROPHAGE\_24H\_IFNG\_STIM\_DN  
149 0.45009485 1.8374546 0 1.85E-04 0.087  
1861 "tags=33%, list=13%, signal=37%"  
GSE15330\_MEGAKARYOCYTE\_ERYTHROID\_PROGENITOR\_VS\_PRO\_BCELL\_DN  
GSE15330\_MEGAKARYOCYTE\_ERYTHROID\_PROGENITOR\_VS\_PRO\_BCELL\_DN  
147 0.44783896 1.836799 0 1.85E-04 0.087  
2401 "tags=41%, list=17%, signal=49%"  
GSE21063\_WT\_VS\_NFATC1\_KO\_BCELL\_DN GSE21063\_WT\_VS\_NFATC1\_KO\_BCELL\_DN  
142 0.44781038 1.8340623 0 1.93E-04  
0.091 1738 "tags=28%, list=12%, signal=32%"  
GSE11961\_MARGINAL\_ZONE\_BCELL\_VS\_MEMORY\_BCELL\_DAY40\_DN  
GSE11961\_MARGINAL\_ZONE\_BCELL\_VS\_MEMORY\_BCELL\_DAY40\_DN  
133 0.44608954 1.8319278 0 1.99E-04 0.094  
1556 "tags=30%, list=11%, signal=33%"  
GSE18791\_CTRL\_VS\_NEWCASTLE\_VIRUS\_DC\_18H\_UP  
GSE18791\_CTRL\_VS\_NEWCASTLE\_VIRUS\_DC\_18H\_UP 133  
0.44612595 1.8316334 0 2.02E-04 0.096  
1601 "tags=30%, list=11%, signal=34%"  
GSE29618\_PRE\_VS\_DAY7\_POST\_LAIV\_FLU\_VACCINE\_PDC\_DN  
GSE29618\_PRE\_VS\_DAY7\_POST\_LAIV\_FLU\_VACCINE\_PDC\_DN 140  
0.44974366 1.8316293 0 2.02E-04 0.096  
2714 "tags=44%, list=19%, signal=54%"  
GSE3982\_MAST\_CELL\_VS\_TH2\_DN GSE3982\_MAST\_CELL\_VS\_TH2\_DN  
148 0.4425076 1.8315998 0 2.02E-04  
0.096 1493 "tags=31%, list=11%, signal=34%"  
GSE360\_CTRL\_VS\_L\_MAJOR\_DC\_UP GSE360\_CTRL\_VS\_L\_MAJOR\_DC\_UP  
150 0.44467452 1.8315698 0 2.01E-04  
0.096 2716 "tags=43%, list=19%, signal=52%"  
GSE6875\_WT\_VS\_FOXP3\_KO\_TREG\_DN GSE6875\_WT\_VS\_FOXP3\_KO\_TREG\_DN  
126 0.44933307 1.8314185 0 2.01E-04  
0.096 1873 "tags=27%, list=13%, signal=31%"  
GSE37301\_MULTIPOTENT\_PROGENITOR\_VS\_RAG2\_KO\_NK\_CELL\_DN  
GSE37301\_MULTIPOTENT\_PROGENITOR\_VS\_RAG2\_KO\_NK\_CELL\_DN  
158 0.4372485 1.8311113 0 2.05E-04 0.098  
2402 "tags=35%, list=17%, signal=42%"  
GSE2585\_CTEC\_VS\_THYMIC\_MACROPHAGE\_DN  
GSE2585\_CTEC\_VS\_THYMIC\_MACROPHAGE\_DN 149  
0.44537422 1.8293625 0 2.17E-04 0.104  
2322 "tags=38%, list=16%, signal=45%"  
GSE17721\_PAM3CSK4\_VS\_GADIQUIMOD\_0.5H\_BMDC\_DN  
GSE17721\_PAM3CSK4\_VS\_GADIQUIMOD\_0.5H\_BMDC\_DN 162  
0.4379374 1.8290575 0 2.16E-04 0.104  
2046 "tags=30%, list=14%, signal=34%"

GSE10325\_BCELL\_VS\_LUPUS\_BCELL\_DN GSE10325\_BCELL\_VS\_LUPUS\_BCELL\_DN  
147 0.44312975 1.8289301 0 2.18E-04  
0.104 1728 "tags=33%, list=12%, signal=38%"  
GSE19941\_IL10\_KO\_VS\_IL10\_KO\_AND\_NFKBP50\_KO\_LPS\_STIM\_MACROPHAGE\_DN  
GSE19941\_IL10\_KO\_VS\_IL10\_KO\_AND\_NFKBP50\_KO\_LPS\_STIM\_MACROPHAGE\_DN  
148 0.44473726 1.8286531 0 2.17E-04  
0.104 2294 "tags=39%, list=16%, signal=46%"  
GSE2405\_0H\_VS\_1.5H\_A\_PHAGOCYTOPHILUM\_STIM\_NEUTROPHIL\_DN  
GSE2405\_0H\_VS\_1.5H\_A\_PHAGOCYTOPHILUM\_STIM\_NEUTROPHIL\_DN  
159 0.43524632 1.8281847 0 2.17E-04 0.104  
2479 "tags=36%, list=18%, signal=43%"  
GSE5099\_MONOCYTE\_VS\_CLASSICAL\_M1\_MACROPHAGE\_DN  
GSE5099\_MONOCYTE\_VS\_CLASSICAL\_M1\_MACROPHAGE\_DN 138  
0.44145438 1.8273174 0 2.19E-04 0.105  
1956 "tags=33%, list=14%, signal=38%"  
GSE17186\_BLOOD\_VS\_CORD\_BLOOD\_NAIVE\_BCELL\_UP  
GSE17186\_BLOOD\_VS\_CORD\_BLOOD\_NAIVE\_BCELL\_UP 155  
0.4409953 1.8263149 0 2.20E-04 0.106  
1900 "tags=33%, list=13%, signal=38%"  
GSE22140\_GERMFREE\_VS\_SPF\_ARTHRITIC\_MOUSE\_CD4\_TCELL\_DN  
GSE22140\_GERMFREE\_VS\_SPF\_ARTHRITIC\_MOUSE\_CD4\_TCELL\_DN  
141 0.44361293 1.8255975 0 2.22E-04 0.107  
1905 "tags=33%, list=13%, signal=37%"  
GSE17721\_LPS\_VS\_PAM3CSK4\_6H\_BMDC\_DN  
GSE17721\_LPS\_VS\_PAM3CSK4\_6H\_BMDC\_DN 150  
0.44160414 1.8255710 2.22E-04 0.107  
1939 "tags=32%, list=14%, signal=37%"  
GSE4984\_GALECTIN1\_VS\_VEHICLE\_CTRL\_TREATED\_DC\_DN  
GSE4984\_GALECTIN1\_VS\_VEHICLE\_CTRL\_TREATED\_DC\_DN 149  
0.4431308 1.8252054 0 2.21E-04 0.107  
2583 "tags=41%, list=18%, signal=50%"  
GSE27786\_LIN\_NEG\_VS\_CD8\_TCELL\_UP GSE27786\_LIN\_NEG\_VS\_CD8\_TCELL\_UP  
151 0.43614054 1.8242353 0 2.25E-04  
0.108 2052 "tags=33%, list=15%, signal=38%"  
GSE32423\_IL7\_VS\_IL7\_IL4\_MEMORY\_CD8\_TCELL\_DN  
GSE32423\_IL7\_VS\_IL7\_IL4\_MEMORY\_CD8\_TCELL\_DN 141  
0.44049683 1.8240587 0 2.27E-04 0.109  
2324 "tags=34%, list=16%, signal=40%"  
GSE19401\_RETINOIC\_ACID\_VS\_RETINOIC\_ACID\_AND\_PAM2CSK4\_STIM\_FOLLICULAR  
\_DC\_DN  
GSE19401\_RETINOIC\_ACID\_VS\_RETINOIC\_ACID\_AND\_PAM2CSK4\_STIM\_FOLLICULAR  
\_DC\_DN 150 0.44155565 1.8233085 0  
2.28E-04 0.11 2455 "tags=37%, list=17%, signal=45%"  
GSE15330 GRANULOCYTE\_MONOCYTE\_PROGENITOR\_VS\_PRO\_BCELL\_UP  
GSE15330 GRANULOCYTE\_MONOCYTE\_PROGENITOR\_VS\_PRO\_BCELL\_UP  
144 0.43788972 1.8232919 0 2.28E-04 0.11  
3114 "tags=51%, list=22%, signal=64%"  
GSE15330\_MEGAKARYOCYTE\_ERYTHROID\_VS\_GRANULOCYTE\_MONOCYTE\_PROGENITOR\_  
IKAROS\_KO\_DN  
GSE15330\_MEGAKARYOCYTE\_ERYTHROID\_VS\_GRANULOCYTE\_MONOCYTE\_PROGENITOR\_  
IKAROS\_KO\_DN 153 0.44329423 1.8230177  
0 2.27E-04 0.11 1282 "tags=27%, list=9%, signal=29%"  
GSE41978\_WT\_VS\_ID2\_KO\_AND\_BIM\_KO\_KLRG1\_LOW\_EFFECTOR\_CD8\_TCELL\_UP  
GSE41978\_WT\_VS\_ID2\_KO\_AND\_BIM\_KO\_KLRG1\_LOW\_EFFECTOR\_CD8\_TCELL\_UP

|                                                            |                                  |                                  |           |          |          |
|------------------------------------------------------------|----------------------------------|----------------------------------|-----------|----------|----------|
|                                                            | 148                              | 0.4381092                        | 1.8225901 | 0        | 2.35E-04 |
| 0.114                                                      | 1679                             | "tags=27%, list=12%, signal=30%" |           |          |          |
| GSE3720_LPS_VS_PMA_STIM_VD1_GAMMADELTA_TCELL_DN            |                                  |                                  |           |          |          |
| GSE3720_LPS_VS_PMA_STIM_VD1_GAMMADELTA_TCELL_DN            |                                  |                                  |           |          | 129      |
| 0.44639358                                                 | 1.8201995                        | 0                                | 2.42E-04  | 0.117    |          |
| 2090                                                       | "tags=39%, list=15%, signal=45%" |                                  |           |          |          |
| GSE2770_UNTREATED_VS_IL4_TREATED_ACT_CD4_TCELL_6H_DN       |                                  |                                  |           |          |          |
| GSE2770_UNTREATED_VS_IL4_TREATED_ACT_CD4_TCELL_6H_DN       |                                  |                                  |           |          |          |
| 145                                                        | 0.44200164                       | 1.8200208                        | 0         | 2.42E-04 | 0.117    |
| 1506                                                       | "tags=25%, list=11%, signal=28%" |                                  |           |          |          |
| GSE45365_NK_CELL_VS_CD8A_DC_UP                             |                                  |                                  |           |          |          |
| GSE45365_NK_CELL_VS_CD8A_DC_UP                             |                                  |                                  |           |          |          |
| 0.117                                                      | 155                              | 0.43967015                       | 1.8200033 | 0        | 2.42E-04 |
| 2487                                                       | "tags=39%, list=18%, signal=47%" |                                  |           |          |          |
| GSE23505_UNTREATED_VS_4DAY_IL6_IL1_TREATED_CD4_TCELL_UP    |                                  |                                  |           |          |          |
| GSE23505_UNTREATED_VS_4DAY_IL6_IL1_TREATED_CD4_TCELL_UP    |                                  |                                  |           |          |          |
| 152                                                        | 0.4415413                        | 1.8191745                        | 0         | 2.47E-04 | 0.12     |
| 2771                                                       | "tags=44%, list=20%, signal=54%" |                                  |           |          |          |
| GSE45365_HEALTHY_VS_MCMV_INFECTION_BCELL_IFNAR_KO_UP       |                                  |                                  |           |          |          |
| GSE45365_HEALTHY_VS_MCMV_INFECTION_BCELL_IFNAR_KO_UP       |                                  |                                  |           |          |          |
| 140                                                        | 0.44050345                       | 1.8186941                        | 0         | 2.51E-04 | 0.121    |
| 1744                                                       | "tags=26%, list=12%, signal=30%" |                                  |           |          |          |
| GSE9006_HEALTHY_VS_TYPE_1_DIABETES_PBMC_4MONTH_POST_DX_UP  |                                  |                                  |           |          |          |
| GSE9006_HEALTHY_VS_TYPE_1_DIABETES_PBMC_4MONTH_POST_DX_UP  |                                  |                                  |           |          |          |
| 145                                                        | 0.43985856                       | 1.8168923                        | 0         | 2.52E-04 | 0.122    |
| 1859                                                       | "tags=36%, list=13%, signal=41%" |                                  |           |          |          |
| GSE37416_0H_VS_24H_F_TULARENSIS_LVS_NEUTROPHIL_UP          |                                  |                                  |           |          |          |
| GSE37416_0H_VS_24H_F_TULARENSIS_LVS_NEUTROPHIL_UP          |                                  |                                  |           |          | 135      |
| 0.44517478                                                 | 1.8165883                        | 0                                | 2.54E-04  | 0.123    |          |
| 1932                                                       | "tags=32%, list=14%, signal=37%" |                                  |           |          |          |
| GSE9988_ANTI_TREM1_AND_LPS_VS_VEHICLE_TREATED_MONOCYTES_DN |                                  |                                  |           |          |          |
| GSE9988_ANTI_TREM1_AND_LPS_VS_VEHICLE_TREATED_MONOCYTES_DN |                                  |                                  |           |          |          |
| 145                                                        | 0.4390374                        | 1.8162836                        | 0         | 2.53E-04 | 0.123    |
| 2083                                                       | "tags=36%, list=15%, signal=42%" |                                  |           |          |          |
| GSE41867_DAY6_VS_DAY8_LCMV_ARMSTRONG_EFFECTOR_CD8_TCELL_DN |                                  |                                  |           |          |          |
| GSE41867_DAY6_VS_DAY8_LCMV_ARMSTRONG_EFFECTOR_CD8_TCELL_DN |                                  |                                  |           |          |          |
| 144                                                        | 0.44380397                       | 1.8153663                        | 0         | 2.55E-04 | 0.124    |
| 1972                                                       | "tags=34%, list=14%, signal=39%" |                                  |           |          |          |
| GSE7831_CPG_VS_INFLUENZA_STIM_PDC_1H_UP                    |                                  |                                  |           |          |          |
| GSE7831_CPG_VS_INFLUENZA_STIM_PDC_1H_UP                    |                                  |                                  |           |          | 155      |
| 0.4311617                                                  | 1.8149781                        | 0                                | 2.54E-04  | 0.124    |          |
| 2805                                                       | "tags=43%, list=20%, signal=53%" |                                  |           |          |          |
| GSE17721_PAM3CSK4_VS_GADIQUIMOD_1H_BMDC_DN                 |                                  |                                  |           |          |          |
| GSE17721_PAM3CSK4_VS_GADIQUIMOD_1H_BMDC_DN                 |                                  |                                  |           |          | 159      |
| 0.4353567                                                  | 1.8148464                        | 0                                | 2.56E-04  | 0.125    |          |
| 2656                                                       | "tags=40%, list=19%, signal=49%" |                                  |           |          |          |
| GSE27859_DC_VS_CD11C_INT_F480_HI_MACROPHAGE_UP             |                                  |                                  |           |          |          |
| GSE27859_DC_VS_CD11C_INT_F480_HI_MACROPHAGE_UP             |                                  |                                  |           |          | 134      |
| 0.44530737                                                 | 1.8144146                        | 0                                | 2.56E-04  | 0.125    |          |
| 2329                                                       | "tags=35%, list=17%, signal=42%" |                                  |           |          |          |
| GSE27786_CD8_TCELL_VS_NKTCELL_DN                           |                                  |                                  |           |          |          |
| GSE27786_CD8_TCELL_VS_NKTCELL_DN                           |                                  |                                  |           |          |          |
| 142                                                        | 0.44398817                       | 1.814366                         | 0         | 2.55E-04 | 0.125    |
| 2394                                                       | "tags=39%, list=17%, signal=47%" |                                  |           |          |          |
| GSE339_CD4POS_VS_CD8POS_DC_IN_CULTURE_DN                   |                                  |                                  |           |          |          |
| GSE339_CD4POS_VS_CD8POS_DC_IN_CULTURE_DN                   |                                  |                                  |           |          | 147      |

0.44050986 1.812706 0 2.62E-04 0.128  
2722 "tags=43%, list=19%, signal=53%"  
GSE32901\_NAIVE\_VS\_TH1\_CD4\_TCELL\_DN  
GSE32901\_NAIVE\_VS\_TH1\_CD4\_TCELL\_DN 142 0.440842  
1.8122282 0 2.62E-04 0.128 2043 "tags=36%,  
list=14%, signal=42%"  
GSE15330\_WT\_VS\_IKAROS\_KO\_HSC\_DN GSE15330\_WT\_VS\_IKAROS\_KO\_HSC\_DN  
149 0.43497294 1.8120302 0 2.62E-04  
0.128 2122 "tags=36%, list=15%, signal=42%"  
GSE16385\_UNTREATED\_VS\_12H\_ROSIGLITAZONE\_IL4\_TREATED\_MACROPHAGE\_UP  
GSE16385\_UNTREATED\_VS\_12H\_ROSIGLITAZONE\_IL4\_TREATED\_MACROPHAGE\_UP  
153 0.4362719 1.8117858 0 2.61E-04  
0.128 2245 "tags=33%, list=16%, signal=39%"  
GSE9509\_10MIN\_VS\_30MIN\_LPS\_AND\_IL10\_STIM\_IL10\_KO\_MACROPHAGE\_UP  
GSE9509\_10MIN\_VS\_30MIN\_LPS\_AND\_IL10\_STIM\_IL10\_KO\_MACROPHAGE\_UP  
136 0.44522944 1.8100517 0 2.65E-04  
0.13 1602 "tags=27%, list=11%, signal=30%"  
GSE17721\_CTRL\_VS\_POLYIC\_6H\_BMDC\_UP  
GSE17721\_CTRL\_VS\_POLYIC\_6H\_BMDC\_UP 148  
0.43668297 1.8097641 0 2.68E-04 0.131  
1811 "tags=34%, list=13%, signal=39%"  
GSE40274\_SATB1\_VS\_FOXP3\_AND\_SATB1\_TRANSDUCE\_ACTIVATED\_CD4\_TCELL\_UP  
GSE40274\_SATB1\_VS\_FOXP3\_AND\_SATB1\_TRANSDUCE\_ACTIVATED\_CD4\_TCELL\_UP  
134 0.44008708 1.8093016 0 2.68E-04  
0.131 2196 "tags=31%, list=16%, signal=36%"  
GSE31082\_DP\_VS\_CD8\_SP\_THYMOCYTE\_UP  
GSE31082\_DP\_VS\_CD8\_SP\_THYMOCYTE\_UP 144  
0.43669805 1.8035158 0 2.80E-04 0.138  
2607 "tags=39%, list=18%, signal=47%"  
GSE24210\_RESTING\_TREG\_VS\_TCONV\_DN GSE24210\_RESTING\_TREG\_VS\_TCONV\_DN  
145 0.43810517 1.8025763 0 2.84E-04  
0.14 2668 "tags=42%, list=19%, signal=51%"  
GSE37416\_0H\_VS\_48H\_F\_TULARENSIS\_LVS\_NEUTROPHIL\_UP  
GSE37416\_0H\_VS\_48H\_F\_TULARENSIS\_LVS\_NEUTROPHIL\_UP 138  
0.43992847 1.801921 0 2.87E-04 0.142  
1893 "tags=34%, list=13%, signal=39%"  
GSE4984\_UNTREATED\_VS\_VEHICLE\_CTRL\_TREATED\_DC\_DN  
GSE4984\_UNTREATED\_VS\_VEHICLE\_CTRL\_TREATED\_DC\_DN 132  
0.44587076 1.8007334 0 2.89E-04 0.143  
2365 "tags=35%, list=17%, signal=41%"  
GSE41867\_LCMV\_ARMSTRONG\_VS\_CLONE13\_DAY6\_EFFECTOR\_CD8\_TCELL\_UP  
GSE41867\_LCMV\_ARMSTRONG\_VS\_CLONE13\_DAY6\_EFFECTOR\_CD8\_TCELL\_UP  
140 0.43596417 1.8006501 0 2.88E-04  
0.143 2685 "tags=44%, list=19%, signal=53%"  
GSE2770\_TGFB\_AND\_IL4\_ACT\_VS\_ACT\_CD4\_TCELL\_48H\_DN  
GSE2770\_TGFB\_AND\_IL4\_ACT\_VS\_ACT\_CD4\_TCELL\_48H\_DN 123  
0.45024836 1.8000166 0 2.92E-04 0.145  
1892 "tags=32%, list=13%, signal=36%"  
GSE3982\_EOSINOPHIL\_VS\_MAST\_CELL\_DN  
GSE3982\_EOSINOPHIL\_VS\_MAST\_CELL\_DN 140  
0.44067213 1.7997121 0 2.95E-04 0.147  
1750 "tags=29%, list=12%, signal=33%"  
GSE2770\_UNTREATED\_VS\_TGFB\_AND\_IL12\_TREATED\_ACT\_CD4\_TCELL\_2H\_DN  
GSE2770\_UNTREATED\_VS\_TGFB\_AND\_IL12\_TREATED\_ACT\_CD4\_TCELL\_2H\_DN

|                                                                      |                                  |                                  |           |                                  |          |
|----------------------------------------------------------------------|----------------------------------|----------------------------------|-----------|----------------------------------|----------|
|                                                                      | 148                              | 0.43161914                       | 1.7991141 | 0                                | 2.94E-04 |
| 0.147                                                                | 969                              | "tags=20%, list=7%, signal=21%"  |           |                                  |          |
| GSE5542_IFNA_VS_IFNA_AND_IFNG_TREATED_EPITHELIAL_CELLS_6H_UP         |                                  |                                  |           |                                  |          |
| GSE5542_IFNA_VS_IFNA_AND_IFNG_TREATED_EPITHELIAL_CELLS_6H_UP         |                                  |                                  |           |                                  |          |
|                                                                      | 137                              | 0.4383007                        | 1.7970691 | 0                                | 3.11E-04 |
| 0.155                                                                | 2769                             | "tags=34%, list=20%, signal=41%" |           |                                  |          |
| GSE30962_ACUTE_VS_CHRONIC_LCMV_PRIMARY_INF_CD8_TCELL_DN              |                                  |                                  |           |                                  |          |
| GSE30962_ACUTE_VS_CHRONIC_LCMV_PRIMARY_INF_CD8_TCELL_DN              |                                  |                                  |           |                                  |          |
| 153                                                                  | 0.43493527                       | 1.7952961                        | 0         | 3.18E-04                         | 0.159    |
| 1415                                                                 | "tags=35%, list=10%, signal=38%" |                                  |           |                                  |          |
| GSE25123_ROSIGLITAZONE_VS_IL4_AND_ROSIGLITAZONE_STIM_PPARG_KO_MACROP |                                  |                                  |           |                                  |          |
| HAGE_DAY10_UP                                                        |                                  |                                  |           |                                  |          |
| GSE25123_ROSIGLITAZONE_VS_IL4_AND_ROSIGLITAZONE_STIM_PPARG_KO_MACROP |                                  |                                  |           |                                  |          |
| HAGE_DAY10_UP                                                        |                                  |                                  |           |                                  |          |
|                                                                      | 137                              | 0.44289637                       | 1.7935758 |                                  |          |
| 0                                                                    | 3.27E-04                         | 0.163                            | 1355      | "tags=24%, list=10%, signal=26%" |          |
| GSE17721_ALL_VS_24H_PAM3CSK4_BMDC_UP                                 |                                  |                                  |           |                                  |          |
| GSE17721_ALL_VS_24H_PAM3CSK4_BMDC_UP                                 |                                  |                                  |           |                                  |          |
|                                                                      |                                  |                                  |           | 154                              |          |
| 0.43411595                                                           | 1.7929428                        | 0                                | 3.28E-04  | 0.163                            |          |
| 1847                                                                 | "tags=35%, list=13%, signal=40%" |                                  |           |                                  |          |
| GSE31082_DN_VS_CD8_SP_THYMOCYTE_UP                                   |                                  |                                  |           |                                  |          |
| GSE31082_DN_VS_CD8_SP_THYMOCYTE_UP                                   |                                  |                                  |           |                                  |          |
|                                                                      |                                  |                                  |           | 146                              |          |
| 0.43095478                                                           | 1.7928044                        | 0                                | 3.28E-04  | 0.163                            |          |
| 2575                                                                 | "tags=36%, list=18%, signal=44%" |                                  |           |                                  |          |
| GSE8678_IL7R_LOW_VS_HIGH_EFF_CD8_TCELL_UP                            |                                  |                                  |           |                                  |          |
| GSE8678_IL7R_LOW_VS_HIGH_EFF_CD8_TCELL_UP                            |                                  |                                  |           |                                  |          |
|                                                                      |                                  |                                  |           | 146                              |          |
| 0.43026802                                                           | 1.7920961                        | 0                                | 3.35E-04  | 0.166                            |          |
| 2539                                                                 | "tags=47%, list=18%, signal=57%" |                                  |           |                                  |          |
| GSE37416_0H_VS_3H_F_TULARENSIS_LVS_NEUTROPHIL_UP                     |                                  |                                  |           |                                  |          |
| GSE37416_0H_VS_3H_F_TULARENSIS_LVS_NEUTROPHIL_UP                     |                                  |                                  |           |                                  |          |
|                                                                      |                                  |                                  |           | 126                              |          |
| 0.44024122                                                           | 1.7913734                        | 0                                | 3.34E-04  | 0.166                            |          |
| 2566                                                                 | "tags=42%, list=18%, signal=51%" |                                  |           |                                  |          |
| GSE360_HIGH_VS_LOW_DOSE_B_MALAYI_DC_DN                               |                                  |                                  |           |                                  |          |
| GSE360_HIGH_VS_LOW_DOSE_B_MALAYI_DC_DN                               |                                  |                                  |           |                                  |          |
|                                                                      |                                  |                                  |           | 145                              |          |
| 0.43779114                                                           | 1.7909219                        | 0                                | 3.35E-04  | 0.167                            |          |
| 1022                                                                 | "tags=21%, list=7%, signal=23%"  |                                  |           |                                  |          |
| GSE17721_CTRL_VS_POLYIC_8H_BMDC_UP                                   |                                  |                                  |           |                                  |          |
| GSE17721_CTRL_VS_POLYIC_8H_BMDC_UP                                   |                                  |                                  |           |                                  |          |
|                                                                      |                                  |                                  |           | 141                              |          |
| 0.43198097                                                           | 1.7904916                        | 0                                | 3.35E-04  | 0.167                            |          |
| 1990                                                                 | "tags=27%, list=14%, signal=31%" |                                  |           |                                  |          |
| GSE15930_STIM_VS_STIM_AND_IL12_72H_CD8_T_CELL_UP                     |                                  |                                  |           |                                  |          |
| GSE15930_STIM_VS_STIM_AND_IL12_72H_CD8_T_CELL_UP                     |                                  |                                  |           |                                  |          |
|                                                                      |                                  |                                  |           | 145                              |          |
| 0.43187767                                                           | 1.7902601                        | 0                                | 3.36E-04  | 0.168                            |          |
| 2226                                                                 | "tags=40%, list=16%, signal=47%" |                                  |           |                                  |          |
| GSE27786_ERYTHROBLAST_VS_MONO_MAC_UP                                 |                                  |                                  |           |                                  |          |
| GSE27786_ERYTHROBLAST_VS_MONO_MAC_UP                                 |                                  |                                  |           |                                  |          |
|                                                                      |                                  |                                  |           | 143                              |          |
| 0.4339295                                                            | 1.7898177                        | 0                                | 3.39E-04  | 0.17                             |          |
| 2237                                                                 | "tags=27%, list=16%, signal=31%" |                                  |           |                                  |          |
| GSE24142_EARLY_THYMIC_PROGENITOR_VS_DN3_THYMOCYTE_ADULT_DN           |                                  |                                  |           |                                  |          |
| GSE24142_EARLY_THYMIC_PROGENITOR_VS_DN3_THYMOCYTE_ADULT_DN           |                                  |                                  |           |                                  |          |
|                                                                      |                                  |                                  |           | 0                                |          |
| 147                                                                  | 0.4359033                        | 1.7890652                        | 0         | 3.46E-04                         | 0.173    |
| 2481                                                                 | "tags=39%, list=18%, signal=47%" |                                  |           |                                  |          |
| GSE19401_UNSTIM_VS_RETINOIC_ACID_STIM_FOLLICULAR_DC_UP               |                                  |                                  |           |                                  |          |
| GSE19401_UNSTIM_VS_RETINOIC_ACID_STIM_FOLLICULAR_DC_UP               |                                  |                                  |           |                                  |          |
|                                                                      |                                  |                                  |           | 0                                |          |
| 148                                                                  | 0.43538824                       | 1.7877792                        | 0         | 3.53E-04                         | 0.177    |

1741 "tags=36%, list=12%, signal=40%"  
GSE30962\_PRIMARY\_VS\_SECONDARY\_CHRONIC\_LCMV\_INF\_CD8\_TCELL\_UP  
GSE30962\_PRIMARY\_VS\_SECONDARY\_CHRONIC\_LCMV\_INF\_CD8\_TCELL\_UP  
152 0.43261304 1.7872978 0 3.54E-04 0.178  
1704 "tags=36%, list=12%, signal=40%"  
GSE17721\_0.5H\_VS\_24H\_PAM3CSK4\_BMDC\_UP  
GSE17721\_0.5H\_VS\_24H\_PAM3CSK4\_BMDC\_UP 162  
0.42659667 1.7863164 0 3.58E-04 0.18  
2416 "tags=40%, list=17%, signal=47%"  
GSE20152\_SPHK1\_KO\_VS\_HTNFA\_OVEREXPRESS\_ANKLE\_DN  
GSE20152\_SPHK1\_KO\_VS\_HTNFA\_OVEREXPRESS\_ANKLE\_DN 134  
0.4380871 1.7856404 0 3.57E-04 0.18  
2154 "tags=34%, list=15%, signal=40%"  
GSE22033\_WT\_VS\_PPARG\_KO\_MEF\_DN GSE22033\_WT\_VS\_PPARG\_KO\_MEF\_DN  
139 0.4385107 1.7854531 0 3.57E-04  
0.18 1949 "tags=27%, list=14%, signal=31%"  
GSE3982\_EOSINOPHIL\_VS\_BCELL\_DN GSE3982\_EOSINOPHIL\_VS\_BCELL\_DN  
131 0.44351444 1.7848167 0 3.60E-04  
0.182 2473 "tags=37%, list=18%, signal=44%"  
GSE15330\_LYMPHOID\_MULTIPOTENT\_VS\_GRANULOCYTE\_MONOCYTE\_PROGENITOR\_UP  
GSE15330\_LYMPHOID\_MULTIPOTENT\_VS\_GRANULOCYTE\_MONOCYTE\_PROGENITOR\_UP  
155 0.4244996 1.7847722 0 3.61E-04  
0.183 2243 "tags=34%, list=16%, signal=40%"  
GSE6092\_UNSTIM\_VS\_IFNG\_STIM\_AND\_B\_BURGDORFERI\_INF\_ENDOTHELIAL\_CELL\_U  
P  
GSE6092\_UNSTIM\_VS\_IFNG\_STIM\_AND\_B\_BURGDORFERI\_INF\_ENDOTHELIAL\_CELL\_U  
P 132 0.43435517 1.7820905 0  
3.69E-04 0.186 1912 "tags=26%, list=14%, signal=30%"  
GSE31082\_CD4\_VS\_CD8\_SP\_THYMOCYTE\_DN  
GSE31082\_CD4\_VS\_CD8\_SP\_THYMOCYTE\_DN 138  
0.43607605 1.7817247 0 3.69E-04 0.186  
2397 "tags=36%, list=17%, signal=43%"  
GSE3982\_MAC\_VS\_CENT\_MEMORY\_CD4\_TCELL\_UP  
GSE3982\_MAC\_VS\_CENT\_MEMORY\_CD4\_TCELL\_UP 150  
0.42798847 1.7814873 0 3.70E-04 0.187  
2393 "tags=39%, list=17%, signal=46%"  
GSE39820\_CTRL\_VS\_TGFBETA1\_IL6\_IL23A\_CD4\_TCELL\_DN  
GSE39820\_CTRL\_VS\_TGFBETA1\_IL6\_IL23A\_CD4\_TCELL\_DN 146  
0.42870703 1.7807761 0 3.77E-04 0.19  
1977 "tags=32%, list=14%, signal=36%"  
GSE32423\_CTRL\_VS\_IL7\_IL4\_MEMORY\_CD8\_TCELL\_DN  
GSE32423\_CTRL\_VS\_IL7\_IL4\_MEMORY\_CD8\_TCELL\_DN 140  
0.43685302 1.7807232 0 3.78E-04 0.191  
1980 "tags=31%, list=14%, signal=36%"  
GSE15330\_WT\_VS\_IKAROS\_KO\_MEGAKARYOCYTE\_ERYTHROID\_PROGENITOR\_UP  
GSE15330\_WT\_VS\_IKAROS\_KO\_MEGAKARYOCYTE\_ERYTHROID\_PROGENITOR\_UP  
147 0.43042612 1.7806168 0 3.78E-04  
0.191 2186 "tags=33%, list=15%, signal=39%"  
GSE10211\_UV\_INACT\_SENDAI\_VS\_LIVE\_SENDAI\_VIRUS\_TRACHEAL\_EPITHELIAL\_CE  
LLS\_DN  
GSE10211\_UV\_INACT\_SENDAI\_VS\_LIVE\_SENDAI\_VIRUS\_TRACHEAL\_EPITHELIAL\_CE  
LLS\_DN 132 0.4355403 1.7805637 0  
3.77E-04 0.191 1018 "tags=21%, list=7%, signal=23%"  
GSE42021\_CD24INT\_TREG\_VS\_CD24INT\_TCONV\_THYMUS\_UP

GSE42021\_CD24INT\_TREG\_VS\_CD24INT\_TCONV\_THYMUS\_UP 160  
0.42754906 1.779352 0 3.87E-04 0.195  
2792 "tags=47%, list=20%, signal=58%"  
GSE32533\_MIR17\_KO\_VS\_MIR17\_OVEREXPRESS\_ACT\_CD4\_TCELL\_UP  
GSE32533\_MIR17\_KO\_VS\_MIR17\_OVEREXPRESS\_ACT\_CD4\_TCELL\_UP  
145 0.43123898 1.7761041 0 4.03E-04 0.199  
2132 "tags=32%, list=15%, signal=37%"  
GSE7852\_TREG\_VS\_TCONV\_FAT\_DN GSE7852\_TREG\_VS\_TCONV\_FAT\_DN  
147 0.4332224 1.7757585 0 4.04E-04  
0.2 2274 "tags=38%, list=16%, signal=45%"  
GSE17974\_0H\_VS\_12H\_IN\_VITRO\_ACT\_CD4\_TCELL\_DN  
GSE17974\_0H\_VS\_12H\_IN\_VITRO\_ACT\_CD4\_TCELL\_DN 133  
0.4369197 1.7753143 0 4.09E-04 0.203  
1737 "tags=31%, list=12%, signal=35%"  
GSE17721\_CTRL\_VS\_PAM3CSK4\_1H\_BMDC\_UP  
GSE17721\_CTRL\_VS\_PAM3CSK4\_1H\_BMDC\_UP 147  
0.43132934 1.77516 0 4.14E-04 0.206  
2118 "tags=33%, list=15%, signal=38%"  
GSE12001\_MIR223\_KO\_VS\_WT\_NEUTROPHIL\_UP  
GSE12001\_MIR223\_KO\_VS\_WT\_NEUTROPHIL\_UP 141  
0.43108836 1.7744284 0 4.13E-04 0.206  
1827 "tags=34%, list=13%, signal=39%"  
GSE25123\_CTRL\_VS\_IL4\_STIM\_MACROPHAGE\_UP  
GSE25123\_CTRL\_VS\_IL4\_STIM\_MACROPHAGE\_UP 128  
0.4317647 1.7725366 0 4.29E-04 0.213  
2267 "tags=32%, list=16%, signal=38%"  
GSE26030\_TH1\_VS\_TH17\_RESTIMULATED\_DAY5\_POST\_POLARIZATION\_DN  
GSE26030\_TH1\_VS\_TH17\_RESTIMULATED\_DAY5\_POST\_POLARIZATION\_DN  
142 0.42819628 1.772156 0 4.30E-04 0.214  
2428 "tags=35%, list=17%, signal=42%"  
GSE3982\_EOSINOPHIL\_VS\_CENT\_MEMORY\_CD4\_TCELL\_DN  
GSE3982\_EOSINOPHIL\_VS\_CENT\_MEMORY\_CD4\_TCELL\_DN 139  
0.4318371 1.7720853 0 4.29E-04 0.214  
1061 "tags=22%, list=8%, signal=23%"  
GSE27786\_LIN\_NEG\_VS\_BCELL\_UP GSE27786\_LIN\_NEG\_VS\_BCELL\_UP  
149 0.42488584 1.7711746 0 4.34E-04  
0.216 2331 "tags=32%, list=17%, signal=37%"  
GSE6269\_FLU\_VS\_STREP\_PNEUMO\_INF\_PBMC\_UP  
GSE6269\_FLU\_VS\_STREP\_PNEUMO\_INF\_PBMC\_UP 107  
0.44458088 1.7688656 0 4.48E-04 0.222  
2358 "tags=43%, list=17%, signal=51%"  
GSE18804\_SPLEEN\_MACROPHAGE\_VS\_COLON\_TUMORAL\_MACROPHAGE\_UP  
GSE18804\_SPLEEN\_MACROPHAGE\_VS\_COLON\_TUMORAL\_MACROPHAGE\_UP  
153 0.42156157 1.7686585 0 4.47E-04 0.222  
2255 "tags=33%, list=16%, signal=39%"  
GSE40277\_EOS\_AND\_LEF1\_TRANSDUCECD\_VS\_GATA1\_AND\_SATB1\_TRANSDUCECD\_CD4\_T  
CELL\_DN  
GSE40277\_EOS\_AND\_LEF1\_TRANSDUCECD\_VS\_GATA1\_AND\_SATB1\_TRANSDUCECD\_CD4\_T  
CELL\_DN 156 0.42418292 1.7686331 0  
4.46E-04 0.222 1863 "tags=31%, list=13%, signal=35%"  
GSE21927\_C26GM\_VS\_4T1\_TUMOR\_MONOCYTE\_BALBC\_UP  
GSE21927\_C26GM\_VS\_4T1\_TUMOR\_MONOCYTE\_BALBC\_UP 147  
0.4301312 1.7673826 0 4.51E-04 0.225  
2052 "tags=32%, list=15%, signal=37%"



GSE3982\_DC\_VS\_NEUTROPHIL\_LPS\_STIM\_UP  
GSE3982\_DC\_VS\_NEUTROPHIL\_LPS\_STIM\_UP 145  
0.42488116 1.7669698 0 4.52E-04 0.226  
2375 "tags=37%, list=17%, signal=43%"  
GSE40184\_HEALTHY\_VS\_HCV\_INFECTED\_DONOR\_PBMC\_DN  
GSE40184\_HEALTHY\_VS\_HCV\_INFECTED\_DONOR\_PBMC\_DN 160  
0.42028594 1.766343 0 4.58E-04 0.23  
2039 "tags=31%, list=14%, signal=36%"  
GSE17721\_CTRL\_VS\_POLYIC\_4H\_BMDC\_UP  
GSE17721\_CTRL\_VS\_POLYIC\_4H\_BMDC\_UP 147  
0.4284545 1.7646879 0 4.68E-04 0.234  
1973 "tags=29%, list=14%, signal=33%"  
GSE7831\_1H\_VS\_4H\_INFLUENZA\_STIM\_PDC\_DN  
GSE7831\_1H\_VS\_4H\_INFLUENZA\_STIM\_PDC\_DN 143  
0.43074784 1.7640945 0 4.73E-04 0.236  
1720 "tags=27%, list=12%, signal=30%"  
GSE8921\_UNSTIM\_VS\_TLR1\_2\_STIM\_MONOCYTE\_3H\_UP  
GSE8921\_UNSTIM\_VS\_TLR1\_2\_STIM\_MONOCYTE\_3H\_UP 141  
0.4313486 1.7640874 0.002222222 4.72E-04 0.236  
1480 "tags=26%, list=10%, signal=28%"  
GSE27786\_LSK\_VS\_NKCELL\_DN GSE27786\_LSK\_VS\_NKCELL\_DN 155  
0.42547494 1.7638425 0 4.73E-04 0.237  
2614 "tags=41%, list=19%, signal=50%"  
GSE29617\_CTRL\_VS\_DAY3\_TIV\_FLU\_VACCINE\_PBMC\_2008\_DN  
GSE29617\_CTRL\_VS\_DAY3\_TIV\_FLU\_VACCINE\_PBMC\_2008\_DN 141  
0.43542567 1.7632787 0 4.83E-04 0.242  
2391 "tags=40%, list=17%, signal=48%"  
GSE17721\_CTRL\_VS\_CPG\_1H\_BMDC\_UP GSE17721\_CTRL\_VS\_CPG\_1H\_BMDC\_UP  
0.242 149 0.42491594 1.7632246 0 4.82E-04  
2505 "tags=40%, list=18%, signal=48%"  
GSE6875\_TCONV\_VS\_TREG\_DN GSE6875\_TCONV\_VS\_TREG\_DN 139  
0.42574328 1.7630719 0 4.82E-04 0.242  
2249 "tags=27%, list=16%, signal=31%"  
GSE22140\_HEALTHY\_VS\_ARTHRTIC\_MOUSE\_CD4\_TCELL\_UP  
GSE22140\_HEALTHY\_VS\_ARTHRTIC\_MOUSE\_CD4\_TCELL\_UP 151  
0.42270714 1.7618855 0 4.99E-04 0.251  
1920 "tags=30%, list=14%, signal=34%"  
GSE27241\_WT\_VS\_RORGT\_KO\_TH17\_POLARIZED\_CD4\_TCELL\_TREATED\_WITH\_DIGOXI  
N\_UP  
GSE27241\_WT\_VS\_RORGT\_KO\_TH17\_POLARIZED\_CD4\_TCELL\_TREATED\_WITH\_DIGOXI  
N\_UP 132 0.43551698 1.7597723 0  
5.14E-04 0.257 1820 "tags=26%, list=13%, signal=29%"  
GSE33374\_CD8\_ALPHAALPHA\_VS\_ALPHABETA\_CD161\_HIGH\_TCELL\_DN  
GSE33374\_CD8\_ALPHAALPHA\_VS\_ALPHABETA\_CD161\_HIGH\_TCELL\_DN  
162 0.42137134 1.7593415 0 5.13E-04 0.257  
1982 "tags=36%, list=14%, signal=42%"  
GSE14415\_INDUCED\_TREG\_VS\_FAILED\_INDUCED\_TREG\_DN  
GSE14415\_INDUCED\_TREG\_VS\_FAILED\_INDUCED\_TREG\_DN 141  
0.43422303 1.7588556 0 5.14E-04 0.257  
1679 "tags=35%, list=12%, signal=40%"  
GSE17721\_0.5H\_VS\_12H\_PAM3CSK4\_BMDC\_DN  
GSE17721\_0.5H\_VS\_12H\_PAM3CSK4\_BMDC\_DN 152  
0.4292747 1.758024 0.002136752 5.22E-04 0.261  
2053 "tags=31%, list=15%, signal=36%"

GSE37605\_FOXP3\_FUSION\_GFP\_VS\_IRES\_GFP\_TREG\_NOD\_UP  
GSE37605\_FOXP3\_FUSION\_GFP\_VS\_IRES\_GFP\_TREG\_NOD\_UP 152  
0.4241378 1.756834 0 5.33E-04 0.268  
2327 "tags=39%, list=16%, signal=46%"  
GSE17721\_0.5H\_VS\_24H\_GARDIQUIMOD\_BMDC\_UP  
GSE17721\_0.5H\_VS\_24H\_GARDIQUIMOD\_BMDC\_UP 154  
0.42084014 1.755841 0 5.43E-04 0.273  
2648 "tags=39%, list=19%, signal=47%"  
GSE17721\_CTRL\_VS\_PAM3CSK4\_0.5H\_BMDC\_UP  
GSE17721\_CTRL\_VS\_PAM3CSK4\_0.5H\_BMDC\_UP 146  
0.42249876 1.7553325 0 5.46E-04 0.275  
2539 "tags=38%, list=18%, signal=45%"  
GSE5589\_WT\_VS\_IL10\_KO\_LPS\_AND\_IL10\_STIM\_MACROPHAGE\_45MIN\_UP  
GSE5589\_WT\_VS\_IL10\_KO\_LPS\_AND\_IL10\_STIM\_MACROPHAGE\_45MIN\_UP  
145 0.42597806 1.7553233 0 5.45E-04 0.275  
1582 "tags=26%, list=11%, signal=29%"  
GSE14908\_ATOPIC\_VS\_NONATOPIC\_PATIENT\_HDM\_STIM\_CD4\_TCELL\_DN  
GSE14908\_ATOPIC\_VS\_NONATOPIC\_PATIENT\_HDM\_STIM\_CD4\_TCELL\_DN  
137 0.42379722 1.7543087 0 5.53E-04 0.28  
1559 "tags=28%, list=11%, signal=31%"  
GSE37301\_MULTIPOTENT\_PROGENITOR\_VS\_COMMON\_LYMPHOID\_PROGENITOR\_DN  
GSE37301\_MULTIPOTENT\_PROGENITOR\_VS\_COMMON\_LYMPHOID\_PROGENITOR\_DN  
162 0.41851452 1.7535444 0 5.57E-04  
0.283 2383 "tags=33%, list=17%, signal=40%"  
GSE5503\_LIVER\_DC\_VS\_MLN\_DC\_ACTIVATED\_ALLOGENIC\_TCELL\_UP  
GSE5503\_LIVER\_DC\_VS\_MLN\_DC\_ACTIVATED\_ALLOGENIC\_TCELL\_UP  
150 0.4187717 1.752091 0 5.75E-04 0.293  
1442 "tags=20%, list=10%, signal=22%"  
GSE31082\_DP\_VS\_CD4\_SP\_THYMOCYTE\_UP  
GSE31082\_DP\_VS\_CD4\_SP\_THYMOCYTE\_UP 128  
0.42663565 1.7495794 0 5.97E-04 0.302  
2166 "tags=40%, list=15%, signal=47%"  
GSE27786\_LSK\_VS\_NKTCELL\_UP GSE27786\_LSK\_VS\_NKTCELL\_UP  
145 0.42344677 1.7472581 0 6.24E-04  
0.316 2268 "tags=31%, list=16%, signal=37%"  
GSE2770\_UNTREATED\_VS\_IL12\_TREATED\_ACT\_CD4\_TCELL\_2H\_UP  
GSE2770\_UNTREATED\_VS\_IL12\_TREATED\_ACT\_CD4\_TCELL\_2H\_UP  
141 0.42423594 1.7472312 0 6.23E-04 0.316  
1742 "tags=33%, list=12%, signal=38%"  
GSE24081\_CONTROLLER\_VS\_PROGRESSOR\_HIV\_SPECIFIC\_CD8\_TCELL\_DN  
GSE24081\_CONTROLLER\_VS\_PROGRESSOR\_HIV\_SPECIFIC\_CD8\_TCELL\_DN  
123 0.43681067 1.746241 0 6.25E-04 0.317  
2068 "tags=31%, list=15%, signal=36%"  
GSE14415\_INDUCED\_TREG\_VS\_FOXP3\_KO\_INDUCED\_TREG\_DN  
GSE14415\_INDUCED\_TREG\_VS\_FOXP3\_KO\_INDUCED\_TREG\_DN 153  
0.4197917 1.7446338 0 6.47E-04 0.326  
2431 "tags=46%, list=17%, signal=55%"  
GSE44732\_UNSTIM\_VS\_IL27\_STIM\_IMATURE\_DC\_DN  
GSE44732\_UNSTIM\_VS\_IL27\_STIM\_IMATURE\_DC\_DN 139  
0.42537054 1.7437774 0 6.52E-04 0.328  
1846 "tags=30%, list=13%, signal=34%"  
GSE3920\_IFNA\_VS\_IFNG\_TREATED\_ENDOTHELIAL\_CELL\_DN  
GSE3920\_IFNA\_VS\_IFNG\_TREATED\_ENDOTHELIAL\_CELL\_DN 135  
0.42776456 1.7432312 0 6.62E-04 0.333

1365 "tags=23%, list=10%, signal=25%"  
GSE45365\_WT\_VS\_IFNAR\_KO\_CD11B\_DC\_DN  
GSE45365\_WT\_VS\_IFNAR\_KO\_CD11B\_DC\_DN 121  
0.4275737 1.7423879 0 6.71E-04 0.337  
1073 "tags=18%, list=8%, signal=20%"  
GSE17721\_LPS\_VS\_CPG\_24H\_BMDC\_DN GSE17721\_LPS\_VS\_CPG\_24H\_BMDC\_DN  
155 0.41541517 1.7421826 0 6.72E-04  
0.338 1949 "tags=26%, list=14%, signal=30%"  
GSE3982\_MAC\_VS\_NEUTROPHIL\_LPS\_STIM\_UP  
GSE3982\_MAC\_VS\_NEUTROPHIL\_LPS\_STIM\_UP 143  
0.4228622 1.7418915 0 6.74E-04 0.34  
2122 "tags=30%, list=15%, signal=35%"  
GSE17721\_LPS\_VS\_CPG\_16H\_BMDC\_DN GSE17721\_LPS\_VS\_CPG\_16H\_BMDC\_DN  
155 0.41438875 1.7414981 0 6.75E-04  
0.341 2205 "tags=28%, list=16%, signal=33%"  
GSE19401\_UNSTIM\_VS\_RETINOIC\_ACID\_AND\_PAM2CSK4\_STIM\_FOLLICULAR\_DC\_UP  
GSE19401\_UNSTIM\_VS\_RETINOIC\_ACID\_AND\_PAM2CSK4\_STIM\_FOLLICULAR\_DC\_UP  
145 0.4196221 1.7408631 0 6.81E-04  
0.343 1910 "tags=31%, list=14%, signal=36%"  
GSE7831\_UNSTIM\_VS\_INFLUENZA\_STIM\_PDC\_1H\_UP  
GSE7831\_UNSTIM\_VS\_INFLUENZA\_STIM\_PDC\_1H\_UP 148  
0.42010945 1.7403877 0 6.85E-04 0.344  
2106 "tags=34%, list=15%, signal=39%"  
GSE36476\_CTRL\_VS\_TSST\_ACT\_16H\_MEMORY\_CD4\_TCELL\_OLD\_DN  
GSE36476\_CTRL\_VS\_TSST\_ACT\_16H\_MEMORY\_CD4\_TCELL\_OLD\_DN  
144 0.41983214 1.7402912 0 6.84E-04 0.344  
2378 "tags=39%, list=17%, signal=46%"  
GSE17721\_CTRL\_VS\_GARDIQUIMOD\_1H\_BMDC\_UP  
GSE17721\_CTRL\_VS\_GARDIQUIMOD\_1H\_BMDC\_UP 152  
0.4203001 1.740276 0.001934236 6.83E-04 0.344  
1787 "tags=28%, list=13%, signal=32%"  
GSE16385\_IFNG\_TNF\_VS\_IL4\_STIM\_MACROPHAGE\_ROSIGLITAZONE\_TREATED\_DN  
GSE16385\_IFNG\_TNF\_VS\_IL4\_STIM\_MACROPHAGE\_ROSIGLITAZONE\_TREATED\_DN  
141 0.4199341 1.7390686 0 6.94E-04  
0.348 1717 "tags=30%, list=12%, signal=34%"  
GSE14308\_INDUCED\_VS\_NATURAL\_TREG\_UP  
GSE14308\_INDUCED\_VS\_NATURAL\_TREG\_UP 137  
0.42338184 1.7387793 0 6.98E-04 0.348  
2028 "tags=33%, list=14%, signal=38%"  
GSE17721\_0.5H\_VS\_12H\_CPG\_BMDC\_UP GSE17721\_0.5H\_VS\_12H\_CPG\_BMDC\_UP  
151 0.4169375 1.7387627 0 6.97E-04  
0.348 2379 "tags=36%, list=17%, signal=43%"  
GSE29617\_CTRL\_VS\_DAY7\_TIV\_FLU\_VACCINE\_PBMC\_2008\_DN  
GSE29617\_CTRL\_VS\_DAY7\_TIV\_FLU\_VACCINE\_PBMC\_2008\_DN 121  
0.43073142 1.738061 0 6.99E-04 0.349  
2072 "tags=34%, list=15%, signal=39%"  
GSE11961\_MARGINAL\_ZONE\_BCELL\_VS\_GERMINAL\_CENTER\_BCELL\_DAY7\_DN  
GSE11961\_MARGINAL\_ZONE\_BCELL\_VS\_GERMINAL\_CENTER\_BCELL\_DAY7\_DN  
137 0.4296988 1.7380229 0 6.98E-04  
0.349 1007 "tags=23%, list=7%, signal=24%"  
GSE6259\_DEC205\_POS\_DC\_VS\_BCELL\_DN GSE6259\_DEC205\_POS\_DC\_VS\_BCELL\_DN  
132 0.42634425 1.7375631 0.002087683  
7.01E-04 0.351 2248 "tags=39%, list=16%, signal=46%"  
GSE7831\_UNSTIM\_VS\_INFLUENZA\_STIM\_PDC\_4H\_DN

GSE7831\_UNSTIM\_VS\_INFLUENZA\_STIM\_PDC\_4H\_DN 147  
0.41918156 1.7360234 0 7.11E-04 0.355  
2103 "tags=36%, list=15%, signal=42%"  
GSE7768\_OVA\_WITH\_LPS\_VS\_OVA\_WITH\_MPL\_IMMUNIZED\_MOUSE\_WHOLE\_SPLEEN\_6H  
\_UP  
GSE7768\_OVA\_WITH\_LPS\_VS\_OVA\_WITH\_MPL\_IMMUNIZED\_MOUSE\_WHOLE\_SPLEEN\_6H  
\_UP 133 0.42204043 1.7356408 0  
7.15E-04 0.356 1482 "tags=25%, list=11%, signal=27%"  
GSE17721\_PAM3CSK4\_VS\_GADIQUIMOD\_12H\_BMDC\_UP  
GSE17721\_PAM3CSK4\_VS\_GADIQUIMOD\_12H\_BMDC\_UP 155  
0.4159739 1.7331204 0 7.49E-04 0.366  
2879 "tags=43%, list=20%, signal=54%"  
GSE36392\_EOSINOPHIL\_VS\_NEUTROPHIL\_IL25\_TREATED\_LUNG\_DN  
GSE36392\_EOSINOPHIL\_VS\_NEUTROPHIL\_IL25\_TREATED\_LUNG\_DN  
150 0.4172725 1.7321897 0 7.58E-04 0.369  
2864 "tags=46%, list=20%, signal=57%"  
GSE360\_L\_MAJOR\_VS\_B\_MALAYI\_HIGH\_DOSE\_MAC\_DN  
GSE360\_L\_MAJOR\_VS\_B\_MALAYI\_HIGH\_DOSE\_MAC\_DN 152  
0.41429982 1.7314386 0 7.70E-04 0.374  
2686 "tags=36%, list=19%, signal=43%"  
GSE40666\_STAT1\_KO\_VS\_STAT4\_KO\_CD8\_TCELL\_UP  
GSE40666\_STAT1\_KO\_VS\_STAT4\_KO\_CD8\_TCELL\_UP 137  
0.42552128 1.7308556 0 7.74E-04 0.376  
2766 "tags=47%, list=20%, signal=58%"  
GSE17721\_CPG\_VS\_GARDIQUIMOD\_1H\_BMDC\_DN  
GSE17721\_CPG\_VS\_GARDIQUIMOD\_1H\_BMDC\_DN 154  
0.41598752 1.7291394 0 7.96E-04 0.384  
2297 "tags=37%, list=16%, signal=44%"  
GSE17721\_LPS\_VS\_CPG\_4H\_BMDC\_DN GSE17721\_LPS\_VS\_CPG\_4H\_BMDC\_DN  
143 0.42161602 1.7275916 0 8.12E-04  
0.389 2536 "tags=37%, list=18%, signal=45%"  
GSE17721\_LPS\_VS\_PAM3CSK4\_12H\_BMDC\_DN  
GSE17721\_LPS\_VS\_PAM3CSK4\_12H\_BMDC\_DN 154  
0.4163272 1.7265486 0 8.24E-04 0.393  
2063 "tags=31%, list=15%, signal=36%"  
GSE13738\_RESTING\_VS\_BYSTANDER\_ACTIVATED\_CD4\_TCELL\_DN  
GSE13738\_RESTING\_VS\_BYSTANDER\_ACTIVATED\_CD4\_TCELL\_DN  
147 0.41752592 1.7246742 0 8.49E-04 0.403  
1976 "tags=32%, list=14%, signal=37%"  
GSE17721\_0.5H\_VS\_8H\_GARDIQUIMOD\_BMDC\_UP  
GSE17721\_0.5H\_VS\_8H\_GARDIQUIMOD\_BMDC\_UP 147  
0.41658503 1.7245843 0 8.48E-04 0.403  
1977 "tags=35%, list=14%, signal=40%"  
GSE9037\_WT\_VS\_IRAK4\_KO\_BMDM\_DN GSE9037\_WT\_VS\_IRAK4\_KO\_BMDM\_DN  
142 0.4213122 1.7245767 0 8.47E-04  
0.403 2050 "tags=25%, list=15%, signal=29%"  
GSE9509\_10MIN\_VS\_30MIN\_LPS\_STIM\_IL10\_KO\_MACROPHAGE\_UP  
GSE9509\_10MIN\_VS\_30MIN\_LPS\_STIM\_IL10\_KO\_MACROPHAGE\_UP  
144 0.41400373 1.7244364 0 8.47E-04 0.404  
1935 "tags=36%, list=14%, signal=41%"  
GSE23321\_CD8\_STEM\_CELL\_MEMORY\_VS\_CENTRAL\_MEMORY\_CD8\_TCELL\_DN  
GSE23321\_CD8\_STEM\_CELL\_MEMORY\_VS\_CENTRAL\_MEMORY\_CD8\_TCELL\_DN  
125 0.42727464 1.7230366 0 8.59E-04  
0.409 2503 "tags=38%, list=18%, signal=45%"

|                                                                       |                                  |                                  |                                  |          |
|-----------------------------------------------------------------------|----------------------------------|----------------------------------|----------------------------------|----------|
| GSE360_DC_VS_MAC_DN                                                   | GSE360_DC_VS_MAC_DN              |                                  |                                  | 147      |
| 0.41546208                                                            | 1.7227689                        | 0                                | 8.58E-04                         | 0.409    |
| 2025                                                                  | "tags=32%, list=14%, signal=37%" |                                  |                                  |          |
| GSE32533_WT_VS_MIR17_KO_ACT_CD4_TCELL_DN                              |                                  |                                  |                                  |          |
| GSE32533_WT_VS_MIR17_KO_ACT_CD4_TCELL_DN                              |                                  |                                  |                                  | 139      |
| 0.4209421                                                             | 1.7224561                        | 0.002057613                      | 8.59E-04                         | 0.409    |
| 2892                                                                  | "tags=44%, list=20%, signal=55%" |                                  |                                  |          |
| GSE339_CD4POS_VS_CD4CD8DN_DC_IN_CULTURE_DN                            |                                  |                                  |                                  |          |
| GSE339_CD4POS_VS_CD4CD8DN_DC_IN_CULTURE_DN                            |                                  |                                  |                                  | 155      |
| 0.4111531                                                             | 1.7214234                        | 0                                | 8.70E-04                         | 0.415    |
| 2190                                                                  | "tags=28%, list=16%, signal=33%" |                                  |                                  |          |
| GSE19941_UNSTIM_VS_LPS_AND_IL10_STIM_IL10_KO_NFKBP50_KO_MACROPHAGE_DN |                                  |                                  |                                  |          |
| GSE19941_UNSTIM_VS_LPS_AND_IL10_STIM_IL10_KO_NFKBP50_KO_MACROPHAGE_DN |                                  |                                  |                                  |          |
| N                                                                     | 147                              | 0.41555882                       | 1.7213494                        | 0        |
| 8.69E-04                                                              | 0.415                            | 1784                             | "tags=24%, list=13%, signal=28%" |          |
| GSE22886_IGG_IGA_MEMORY_BCELL_VS_BLOOD_PLASMA_CELL_DN                 |                                  |                                  |                                  |          |
| GSE22886_IGG_IGA_MEMORY_BCELL_VS_BLOOD_PLASMA_CELL_DN                 |                                  |                                  |                                  |          |
| 142                                                                   | 0.41560692                       | 1.7213423                        | 0                                | 8.68E-04 |
| 2052                                                                  | "tags=32%, list=15%, signal=37%" |                                  |                                  |          |
| GSE27786_CD4_TCELL_VS_NKCELL_DN                                       | GSE27786_CD4_TCELL_VS_NKCELL_DN  |                                  |                                  |          |
| 148                                                                   | 0.41428375                       | 1.7208519                        | 0                                | 8.78E-04 |
| 0.419                                                                 | 3160                             | "tags=46%, list=22%, signal=59%" |                                  |          |
| GSE3720_UNSTIM_VS_LPS_STIM_VD1_GAMMADELTA_TCELL_UP                    |                                  |                                  |                                  |          |
| GSE3720_UNSTIM_VS_LPS_STIM_VD1_GAMMADELTA_TCELL_UP                    |                                  |                                  |                                  | 135      |
| 0.4149178                                                             | 1.7204264                        | 0                                | 8.83E-04                         | 0.422    |
| 2688                                                                  | "tags=37%, list=19%, signal=45%" |                                  |                                  |          |
| GSE17721_PAM3CSK4_VS_CPG_0.5H_BMDC_DN                                 |                                  |                                  |                                  |          |
| GSE17721_PAM3CSK4_VS_CPG_0.5H_BMDC_DN                                 |                                  |                                  |                                  | 150      |
| 0.41680804                                                            | 1.7188841                        | 0                                | 9.00E-04                         | 0.429    |
| 1824                                                                  | "tags=23%, list=13%, signal=26%" |                                  |                                  |          |
| GSE2770_IL12_ACT_VS_ACT_CD4_TCELL_6H_UP                               |                                  |                                  |                                  |          |
| GSE2770_IL12_ACT_VS_ACT_CD4_TCELL_6H_UP                               |                                  |                                  |                                  | 133      |
| 0.42106563                                                            | 1.7178504                        | 0.002020202                      | 9.09E-04                         | 0.432    |
| 1886                                                                  | "tags=32%, list=13%, signal=37%" |                                  |                                  |          |
| GSE15659_NAIVE_CD4_TCELL_VS_ACTIVATED_TREG_DN                         |                                  |                                  |                                  |          |
| GSE15659_NAIVE_CD4_TCELL_VS_ACTIVATED_TREG_DN                         |                                  |                                  |                                  | 131      |
| 0.42269352                                                            | 1.7178104                        | 0                                | 9.07E-04                         | 0.432    |
| 1702                                                                  | "tags=21%, list=12%, signal=24%" |                                  |                                  |          |
| GSE2585_AIRE_KO_VS_WT_CD80_HIGH_MTEC_UP                               |                                  |                                  |                                  |          |
| GSE2585_AIRE_KO_VS_WT_CD80_HIGH_MTEC_UP                               |                                  |                                  |                                  | 151      |
| 0.41240042                                                            | 1.7174169                        | 0                                | 9.08E-04                         | 0.432    |
| 2280                                                                  | "tags=32%, list=16%, signal=38%" |                                  |                                  |          |
| GSE16385_ROSIGLITAZONE_IL4_VS_ROSIGLITAZONE_ALONE_STIM_MACROPHAGE_DN  |                                  |                                  |                                  |          |
| GSE16385_ROSIGLITAZONE_IL4_VS_ROSIGLITAZONE_ALONE_STIM_MACROPHAGE_DN  |                                  |                                  |                                  |          |
|                                                                       | 156                              | 0.4126134                        | 1.71704                          | 0        |
| 0.436                                                                 | 1483                             | "tags=21%, list=11%, signal=23%" |                                  |          |
| GSE27786_BCELL_VS_MONO_MAC_DN                                         | GSE27786_BCELL_VS_MONO_MAC_DN    |                                  |                                  |          |
| 149                                                                   | 0.4127313                        | 1.7166439                        | 0.001980198                      |          |
| 9.13E-04                                                              | 0.437                            | 2311                             | "tags=29%, list=16%, signal=34%" |          |
| GSE3982_NEUTROPHIL_VS_EFF_MEMORY_CD4_TCELL_DN                         |                                  |                                  |                                  |          |
| GSE3982_NEUTROPHIL_VS_EFF_MEMORY_CD4_TCELL_DN                         |                                  |                                  |                                  | 135      |
| 0.42241246                                                            | 1.7165817                        | 0                                | 9.12E-04                         | 0.437    |

1791 "tags=29%, list=13%, signal=33%"  
GSE21670\_UNTREATED\_VS\_TGFB\_IL6\_TREATED\_CD4\_TCELL\_DN  
GSE21670\_UNTREATED\_VS\_TGFB\_IL6\_TREATED\_CD4\_TCELL\_DN  
105 0.43140125 1.715659 0 9.24E-04 0.443  
2647 "tags=39%, list=19%, signal=48%"  
GSE28726\_NAIVE\_VS\_ACTIVATED\_NKTCELL\_DN  
GSE28726\_NAIVE\_VS\_ACTIVATED\_NKTCELL\_DN 153  
0.40469941 1.7141031 0 9.48E-04 0.448  
2420 "tags=41%, list=17%, signal=49%"  
GSE40068\_CXCR5NEG\_BCL6NEG\_CD4\_TCELL\_VS\_CXCR5POS\_BCL6NEG\_TFH\_DN  
GSE40068\_CXCR5NEG\_BCL6NEG\_CD4\_TCELL\_VS\_CXCR5POS\_BCL6NEG\_TFH\_DN  
161 0.40582362 1.7140617 0 9.47E-04  
0.448 1702 "tags=35%, list=12%, signal=40%"  
GSE26669\_CTRL\_VS\_COSTIM\_BLOCK\_MLR\_CD4\_TCELL\_UP  
GSE26669\_CTRL\_VS\_COSTIM\_BLOCK\_MLR\_CD4\_TCELL\_UP 140  
0.4149378 1.713751 0 9.52E-04 0.449  
2389 "tags=40%, list=17%, signal=48%"  
GSE40274\_CTRL\_VS\_FOXP3\_AND\_PBX1\_TRANSDUCE\_ACTIVATED\_CD4\_TCELL\_DN  
GSE40274\_CTRL\_VS\_FOXP3\_AND\_PBX1\_TRANSDUCE\_ACTIVATED\_CD4\_TCELL\_DN  
121 0.42815414 1.7120692 0.00209205  
9.73E-04 0.458 2791 "tags=38%, list=20%, signal=47%"  
GSE5960\_TH1\_VS\_ANERGIC\_TH1\_DN GSE5960\_TH1\_VS\_ANERGIC\_TH1\_DN  
167 0.40794784 1.711562 0 9.78E-04 0.46  
2228 "tags=35%, list=16%, signal=41%"  
GSE41867\_NAIVE\_VS\_EFFECTOR\_CD8\_TCELL\_DN  
GSE41867\_NAIVE\_VS\_EFFECTOR\_CD8\_TCELL\_DN 142  
0.42142835 1.7108586 0 9.91E-04 0.464  
2420 "tags=35%, list=17%, signal=42%"  
GSE25677\_R848\_VS\_MPL\_AND\_R848\_STIM\_BCELL\_DN  
GSE25677\_R848\_VS\_MPL\_AND\_R848\_STIM\_BCELL\_DN 126  
0.41822153 1.7097559 0.002132196 0.001010808  
0.471 2091 "tags=35%, list=15%, signal=41%"  
GSE360\_L\_DONOVANI\_VS\_B\_MALAYI\_LOW\_DOSE\_DC\_DN  
GSE360\_L\_DONOVANI\_VS\_B\_MALAYI\_LOW\_DOSE\_DC\_DN 153  
0.4152448 1.7095271 0 0.001011038 0.471  
2319 "tags=37%, list=16%, signal=43%"  
GSE20152\_SPHK1\_KO\_VS\_WT\_HTNFA\_OVERXPRESS\_ANKLE\_DN  
GSE20152\_SPHK1\_KO\_VS\_WT\_HTNFA\_OVERXPRESS\_ANKLE\_DN 130  
0.42045686 1.7063305 0.002227172 0.00106538  
0.488 2008 "tags=32%, list=14%, signal=37%"  
GSE6269\_HEALTHY\_VS\_STAPH\_PNEUMO\_INF\_PBMC\_UP  
GSE6269\_HEALTHY\_VS\_STAPH\_PNEUMO\_INF\_PBMC\_UP 130  
0.4177004 1.7059225 0 0.00106867 0.49  
1854 "tags=32%, list=13%, signal=36%"  
GSE3720\_VD1\_VS\_VD2\_GAMMADELTA\_TCELL\_UP  
GSE3720\_VD1\_VS\_VD2\_GAMMADELTA\_TCELL\_UP 156  
0.40701628 1.7044055 0 0.001100511 0.504  
1841 "tags=27%, list=13%, signal=31%"  
GSE5542\_UNTREATED\_VS\_IFNA\_AND\_IFNG\_TREATED\_EPITHELIAL\_CELLS\_24H\_UP  
GSE5542\_UNTREATED\_VS\_IFNA\_AND\_IFNG\_TREATED\_EPITHELIAL\_CELLS\_24H\_UP  
130 0.4137904 1.7041712 0  
0.001099025 0.504 1726 "tags=32%, list=12%, signal=36%"  
GSE17721\_CTRL\_VS\_PAM3CSK4\_8H\_BMDC\_UP  
GSE17721\_CTRL\_VS\_PAM3CSK4\_8H\_BMDC\_UP 146

|                                                                              |                                   |                                  |                                  |             |
|------------------------------------------------------------------------------|-----------------------------------|----------------------------------|----------------------------------|-------------|
| 0.41120285                                                                   | 1.7039543                         | 0                                | 0.001099095                      | 0.504       |
| 1243                                                                         | "tags=25%, list=9%, signal=27%"   |                                  |                                  |             |
| GSE14308_TH17_VS_NAIVE_CD4_TCELL_UP                                          |                                   |                                  |                                  |             |
| GSE14308_TH17_VS_NAIVE_CD4_TCELL_UP                                          |                                   |                                  | 141                              |             |
| 0.40761074                                                                   | 1.7033380                         | 0.001102394                      | 0.506                            |             |
| 2271                                                                         | "tags=33%, list=16%, signal=39%"  |                                  |                                  |             |
| GSE15330_HSC_VS_PRO_BCELL_DN                                                 | GSE15330_HSC_VS_PRO_BCELL_DN      |                                  |                                  |             |
| 145                                                                          | 0.40987214                        | 1.7028477                        | 0                                |             |
| 0.00110404                                                                   | 0.507                             | 1857                             | "tags=30%, list=13%, signal=35%" |             |
| GSE24726_WT_VS_E2_2_KO_PDC_UP                                                | GSE24726_WT_VS_E2_2_KO_PDC_UP     |                                  |                                  |             |
| 141                                                                          | 0.4171976                         | 1.7018771                        | 0                                |             |
| 0.001123105                                                                  | 0.513                             | 1241                             | "tags=27%, list=9%, signal=29%"  |             |
| GSE2770_IL4_ACT_VS_ACT_CD4_TCELL_6H_UP                                       |                                   |                                  |                                  |             |
| GSE2770_IL4_ACT_VS_ACT_CD4_TCELL_6H_UP                                       |                                   |                                  | 126                              |             |
| 0.41571927                                                                   | 1.6989745                         | 0                                | 0.001170409                      | 0.522       |
| 2094                                                                         | "tags=37%, list=15%, signal=42%"  |                                  |                                  |             |
| GSE22886_NAIVE_CD4_TCELL_VS_NKCELL_DN                                        |                                   |                                  |                                  |             |
| GSE22886_NAIVE_CD4_TCELL_VS_NKCELL_DN                                        |                                   |                                  | 146                              |             |
| 0.40728027                                                                   | 1.698860                          | 0.001170462                      | 0.522                            |             |
| 2531                                                                         | "tags=40%, list=18%, signal=49%"  |                                  |                                  |             |
| GSE29618_BCELL_VS_MONOCYTE_DN                                                | GSE29618_BCELL_VS_MONOCYTE_DN     |                                  |                                  |             |
| 160                                                                          | 0.40227136                        | 1.6973538                        | 0                                |             |
| 0.001192484                                                                  | 0.529                             | 1847                             | "tags=32%, list=13%, signal=36%" |             |
| GSE37301_COMMON_LYMPHOID_PROGENITOR_VS_CD4_TCELL_DN                          |                                   |                                  |                                  |             |
| GSE37301_COMMON_LYMPHOID_PROGENITOR_VS_CD4_TCELL_DN                          |                                   |                                  |                                  |             |
| 152                                                                          | 0.40515268                        | 1.6971345                        | 0                                | 0.0011987   |
| 0.53                                                                         | 1912                              | "tags=30%, list=14%, signal=35%" |                                  |             |
| GSE22886_NAIVE_VS_MEMORY_TCELL_DN                                            | GSE22886_NAIVE_VS_MEMORY_TCELL_DN |                                  |                                  |             |
| 154                                                                          | 0.4034129                         | 1.6969836                        | 0                                |             |
| 0.001198699                                                                  | 0.531                             | 1348                             | "tags=23%, list=10%, signal=26%" |             |
| GSE5455_EX_VIVO_VS_POST_24H_INCUBATION_MONOCYTES_FROM_TUMOR_BEARING_MOUSE_UP |                                   |                                  |                                  |             |
| GSE5455_EX_VIVO_VS_POST_24H_INCUBATION_MONOCYTES_FROM_TUMOR_BEARING_MOUSE_UP |                                   |                                  |                                  |             |
| 135                                                                          | 0.41636324                        | 1.6967914                        | 0                                |             |
| 0.001200212                                                                  | 0.532                             | 2232                             | "tags=33%, list=16%, signal=38%" |             |
| GSE3982_DC_VS_MAC_DN                                                         | GSE3982_DC_VS_MAC_DN              |                                  | 144                              |             |
| 0.4063687                                                                    | 1.6965706                         | 0                                | 0.001201723                      | 0.532       |
| 956                                                                          | "tags=17%, list=7%, signal=18%"   |                                  |                                  |             |
| GSE22432_MULTIPOTENT_VS_COMMON_DC_PROGENITOR_UNTREATED_UP                    |                                   |                                  |                                  |             |
| GSE22432_MULTIPOTENT_VS_COMMON_DC_PROGENITOR_UNTREATED_UP                    |                                   |                                  |                                  |             |
| 146                                                                          | 0.4156539                         | 1.6963916                        | 0                                | 0.001206378 |
| 0.535                                                                        | 2505                              | "tags=40%, list=18%, signal=48%" |                                  |             |
| GSE2585_THYMIC_MACROPHAGE_VS_MTEC_UP                                         |                                   |                                  |                                  |             |
| GSE2585_THYMIC_MACROPHAGE_VS_MTEC_UP                                         |                                   |                                  | 147                              |             |
| 0.40821102                                                                   | 1.6957787                         | 0                                | 0.001220504                      | 0.539       |
| 1490                                                                         | "tags=22%, list=11%, signal=25%"  |                                  |                                  |             |
| GSE39820_TGFBETA1_VS_TGFBETA3_IN_IL6_TREATED_CD4_TCELL_DN                    |                                   |                                  |                                  |             |
| GSE39820_TGFBETA1_VS_TGFBETA3_IN_IL6_TREATED_CD4_TCELL_DN                    |                                   |                                  |                                  |             |
| 137                                                                          | 0.41552153                        | 1.6952335                        | 0                                | 0.001232887 |
| 0.543                                                                        | 2481                              | "tags=32%, list=18%, signal=39%" |                                  |             |
| GSE11057_NAIVE_CD4_VS_PBMC_CD4_TCELL_DN                                      |                                   |                                  |                                  |             |
| GSE11057_NAIVE_CD4_VS_PBMC_CD4_TCELL_DN                                      |                                   |                                  | 147                              |             |
| 0.4120574                                                                    | 1.6950207                         | 0                                | 0.001234341                      | 0.543       |
| 2444                                                                         | "tags=33%, list=17%, signal=40%"  |                                  |                                  |             |

GSE41867\_NAIVE\_VS\_DAY15\_LCMV\_ARMSTRONG\_EFFECTOR\_CD8\_TCELL\_UP  
GSE41867\_NAIVE\_VS\_DAY15\_LCMV\_ARMSTRONG\_EFFECTOR\_CD8\_TCELL\_UP  
149 0.40734735 1.6946855 0  
0.001238889 0.546 2412 "tags=38%, list=17%, signal=45%"  
GSE10325\_MYELOID\_VS\_LUPUS\_MYELOID\_DN  
GSE10325\_MYELOID\_VS\_LUPUS\_MYELOID\_DN 137  
0.4170317 1.6945504 0 0.001238838 0.546  
1924 "tags=36%, list=14%, signal=42%"  
GSE39152\_BRAIN\_VS\_SPLEEN\_CD103\_NEG\_MEMORY\_CD8\_TCELL\_DN  
GSE39152\_BRAIN\_VS\_SPLEEN\_CD103\_NEG\_MEMORY\_CD8\_TCELL\_DN  
159 0.40436935 1.6932917 0 0.001257313  
0.554 2115 "tags=36%, list=15%, signal=42%"  
GSE12198\_NK\_VS\_NK\_ACT\_EXPANSION\_SYSTEM\_DERIVED\_NK\_CELL\_DN  
GSE12198\_NK\_VS\_NK\_ACT\_EXPANSION\_SYSTEM\_DERIVED\_NK\_CELL\_DN  
164 0.39815804 1.6919252 0 0.001286472  
0.562 1889 "tags=34%, list=13%, signal=38%"  
GSE22611\_NOD2\_TRANSDUCECD\_VS\_CTRL\_HEK293T\_STIMULATED\_WITH\_MDP\_2H\_DN  
GSE22611\_NOD2\_TRANSDUCECD\_VS\_CTRL\_HEK293T\_STIMULATED\_WITH\_MDP\_2H\_DN  
152 0.4111575 1.6919045 0  
0.001284782 0.562 2064 "tags=32%, list=15%, signal=37%"  
GSE360\_CTRL\_VS\_T\_GONDII\_MAC\_UP GSE360\_CTRL\_VS\_T\_GONDII\_MAC\_UP  
154 0.40866825 1.6910763 0  
0.001296969 0.568 1751 "tags=28%, list=12%, signal=32%"  
GOLDRATH\_NAIVE\_VS\_MEMORY\_CD8\_TCELL\_DN  
GOLDRATH\_NAIVE\_VS\_MEMORY\_CD8\_TCELL\_DN 167  
0.40099472 1.6907716 0 0.00130304 0.57  
1682 "tags=34%, list=12%, signal=38%"  
GSE3337\_CTRL\_VS\_4H\_IFNG\_IN\_CD8POS\_DC\_DN  
GSE3337\_CTRL\_VS\_4H\_IFNG\_IN\_CD8POS\_DC\_DN 162 0.400072  
1.6902888 0 0.001315129 0.572  
2067 "tags=37%, list=15%, signal=43%"  
GSE17974\_IL4\_AND\_ANTI\_IL12\_VS\_UNTREATED\_0.5H\_ACT\_CD4\_TCELL\_UP  
GSE17974\_IL4\_AND\_ANTI\_IL12\_VS\_UNTREATED\_0.5H\_ACT\_CD4\_TCELL\_UP  
105 0.42640665 1.6902071 0.002057613  
0.00131341 0.572 2657 "tags=35%, list=19%, signal=43%"  
GSE3565\_CTRL\_VS\_LPS\_INJECTED\_DUSP1\_KO\_SPLENOCYTES\_UP  
GSE3565\_CTRL\_VS\_LPS\_INJECTED\_DUSP1\_KO\_SPLENOCYTES\_UP  
153 0.4052992 1.6900929 0 0.001313265  
0.572 1737 "tags=39%, list=12%, signal=43%"  
GSE3982\_MAC\_VS\_NEUTROPHIL\_UP GSE3982\_MAC\_VS\_NEUTROPHIL\_UP  
148 0.4063195 1.6886318 0  
0.001348353 0.587 2656 "tags=39%, list=19%, signal=48%"  
GSE32901\_NAIVE\_VS\_TH17\_NEG\_CD4\_TCELL\_DN  
GSE32901\_NAIVE\_VS\_TH17\_NEG\_CD4\_TCELL\_DN 99  
0.43831342 1.6872908 0.002061856 0.001386461  
0.594 1297 "tags=19%, list=9%, signal=21%"  
GSE17301\_CTRL\_VS\_48H\_ACD3\_ACD28\_IFNA2\_STIM\_CD8\_TCELL\_UP  
GSE17301\_CTRL\_VS\_48H\_ACD3\_ACD28\_IFNA2\_STIM\_CD8\_TCELL\_UP  
150 0.40834108 1.6868436 0 0.001398416  
0.599 1961 "tags=33%, list=14%, signal=38%"  
GSE18791\_CTRL\_VS\_NEWCASTLE\_VIRUS\_DC\_16H\_UP  
GSE18791\_CTRL\_VS\_NEWCASTLE\_VIRUS\_DC\_16H\_UP 130  
0.41598248 1.6859671 0 0.001411968 0.604  
2378 "tags=34%, list=17%, signal=40%"



|                                                                    |                                                                    |                                  |                                  |             |  |
|--------------------------------------------------------------------|--------------------------------------------------------------------|----------------------------------|----------------------------------|-------------|--|
| GSE17721_CTRL_VS_LPS_4H_BMDC_UP                                    | GSE17721_CTRL_VS_LPS_4H_BMDC_UP                                    |                                  |                                  |             |  |
| 151                                                                | 0.4019444                                                          | 1.6858487                        | 0                                |             |  |
| 0.001417813                                                        | 0.605                                                              | 1961                             | "tags=31%, list=14%, signal=36%" |             |  |
| GSE2770_IL12_VS_TGFB_AND_IL12_TREATED_ACT_CD4_TCELL_6H_DN          | GSE2770_IL12_VS_TGFB_AND_IL12_TREATED_ACT_CD4_TCELL_6H_DN          |                                  |                                  |             |  |
| 131                                                                | 0.4153464                                                          | 1.6855081                        | 0                                | 0.001432687 |  |
| 0.61                                                               | 2612                                                               | "tags=40%, list=19%, signal=48%" |                                  |             |  |
| GSE6269_E_COLI_VS_STAPH_AUREUS_INF_PBMC_DN                         | GSE6269_E_COLI_VS_STAPH_AUREUS_INF_PBMC_DN                         |                                  |                                  |             |  |
| 0.4080738                                                          | 1.6845616                                                          | 0                                | 0.001458181                      | 0.62        |  |
| 1988                                                               | "tags=33%, list=14%, signal=38%"                                   |                                  |                                  |             |  |
| GSE43957_UNTREATED_VS_NACL_TREATED_ANTI_CD3_CD28_STIM_CD4_TCELL_DN | GSE43957_UNTREATED_VS_NACL_TREATED_ANTI_CD3_CD28_STIM_CD4_TCELL_DN |                                  |                                  |             |  |
| 155                                                                | 0.40393364                                                         | 1.6844286                        | 0                                |             |  |
| 0.001460856                                                        | 0.621                                                              | 2423                             | "tags=34%, list=17%, signal=41%" |             |  |
| GSE41087_WT_VS_FOXP3_MUT_ANTI_CD3_CD28_STIM_CD4_TCELL_DN           | GSE41087_WT_VS_FOXP3_MUT_ANTI_CD3_CD28_STIM_CD4_TCELL_DN           |                                  |                                  |             |  |
| 141                                                                | 0.40659484                                                         | 1.6802456                        | 0                                | 0.001551224 |  |
| 0.642                                                              | 2197                                                               | "tags=36%, list=16%, signal=42%" |                                  |             |  |
| GSE19198_CTRL_VS_IL21_TREATED_TCELL_6H_UP                          | GSE19198_CTRL_VS_IL21_TREATED_TCELL_6H_UP                          |                                  |                                  |             |  |
| 0.39947432                                                         | 1.6795741                                                          | 0                                | 0.001565946                      | 0.646       |  |
| 1974                                                               | "tags=32%, list=14%, signal=37%"                                   |                                  |                                  |             |  |
| GSE30971_CTRL_VS_LPS_STIM_MACROPHAGE_WBP7_HET_4H_DN                | GSE30971_CTRL_VS_LPS_STIM_MACROPHAGE_WBP7_HET_4H_DN                |                                  |                                  |             |  |
| 145                                                                | 0.40680167                                                         | 1.6770166                        | 0.00210084                       |             |  |
| 0.001616901                                                        | 0.653                                                              | 2360                             | "tags=35%, list=17%, signal=42%" |             |  |
| GSE34205_RSV_VS_FLU_INF_INFANT_PBMC_DN                             | GSE34205_RSV_VS_FLU_INF_INFANT_PBMC_DN                             |                                  |                                  |             |  |
| 0.41490388                                                         | 1.6757274                                                          | 0                                | 0.001640515                      | 0.656       |  |
| 2696                                                               | "tags=36%, list=19%, signal=44%"                                   |                                  |                                  |             |  |
| GSE7460_CTRL_VS_FOXP3_OVEREXPR_TCONV_1_UP                          | GSE7460_CTRL_VS_FOXP3_OVEREXPR_TCONV_1_UP                          |                                  |                                  |             |  |
| 0.4060927                                                          | 1.6755712                                                          | 0                                | 0.001638409                      | 0.656       |  |
| 1633                                                               | "tags=21%, list=12%, signal=24%"                                   |                                  |                                  |             |  |
| GSE25088_WT_VS_STAT6_KO_MACROPHAGE_ROSIGLITAZONE_AND_IL4_STIM_UP   | GSE25088_WT_VS_STAT6_KO_MACROPHAGE_ROSIGLITAZONE_AND_IL4_STIM_UP   |                                  |                                  |             |  |
| 149                                                                | 0.40876377                                                         | 1.6750623                        | 0                                |             |  |
| 0.001663272                                                        | 0.664                                                              | 2140                             | "tags=30%, list=15%, signal=34%" |             |  |
| GSE7568_IL4_TGFB_DEXAMETHASONE_VS_IL4_TGFB_TREATED_MACROPHAGE_UP   | GSE7568_IL4_TGFB_DEXAMETHASONE_VS_IL4_TGFB_TREATED_MACROPHAGE_UP   |                                  |                                  |             |  |
| 138                                                                | 0.40995824                                                         | 1.6746371                        | 0                                |             |  |
| 0.001674631                                                        | 0.667                                                              | 1755                             | "tags=30%, list=12%, signal=34%" |             |  |
| GSE23114_WT_VS_SLE2C1_MOUSE_SPLEEN_B1A_BCELL_UP                    | GSE23114_WT_VS_SLE2C1_MOUSE_SPLEEN_B1A_BCELL_UP                    |                                  |                                  |             |  |
| 0.40657526                                                         | 1.6743749                                                          | 0                                | 0.001681556                      | 0.67        |  |
| 2598                                                               | "tags=42%, list=18%, signal=51%"                                   |                                  |                                  |             |  |
| GSE27670_CTRL_VS_LMP1_TRANSDUCE_GC_BCELL_UP                        | GSE27670_CTRL_VS_LMP1_TRANSDUCE_GC_BCELL_UP                        |                                  |                                  |             |  |
| 0.39813933                                                         | 1.6743290                                                          | 0.001680867                      | 0.67                             |             |  |
| 1718                                                               | "tags=27%, list=12%, signal=30%"                                   |                                  |                                  |             |  |
| GSE7218_UNSTIM_VS_ANTIGEN_STIM_THROUGH_IGG_BCELL_DN                | GSE7218_UNSTIM_VS_ANTIGEN_STIM_THROUGH_IGG_BCELL_DN                |                                  |                                  |             |  |
| 135                                                                | 0.40755746                                                         | 1.6734120                        | 0.001698241                      | 0.672       |  |

|                                                |                                   |                                  |                                  |             |       |
|------------------------------------------------|-----------------------------------|----------------------------------|----------------------------------|-------------|-------|
| 2374                                           | "tags=39%, list=17%, signal=47%"  |                                  |                                  |             |       |
| GSE1460_CORD_VS_ADULT_BLOOD_NAIVE_CD4_TCELL_DN |                                   |                                  |                                  |             |       |
| GSE1460_CORD_VS_ADULT_BLOOD_NAIVE_CD4_TCELL_DN |                                   |                                  |                                  |             | 141   |
| 0.40478355                                     | 1.6728038                         | 0                                | 0.001703589                      |             | 0.673 |
| 2625                                           | "tags=38%, list=19%, signal=46%"  |                                  |                                  |             |       |
| GSE339_CD8POS_VS_CD4CD8DN_DC_IN_CULTURE_UP     |                                   |                                  |                                  |             |       |
| GSE339_CD8POS_VS_CD4CD8DN_DC_IN_CULTURE_UP     |                                   |                                  |                                  | 158         |       |
| 0.39681807                                     | 1.6715391                         | 0                                | 0.001731159                      |             | 0.678 |
| 2215                                           | "tags=34%, list=16%, signal=40%"  |                                  |                                  |             |       |
| GSE13485_DAY3_VS_DAY7_YF17D_VACCINE_PBMCDN     |                                   |                                  |                                  |             |       |
| GSE13485_DAY3_VS_DAY7_YF17D_VACCINE_PBMCDN     |                                   |                                  |                                  |             | 122   |
| 0.41400284                                     | 1.6713579                         | 0                                | 0.001734905                      |             | 0.68  |
| 1256                                           | "tags=25%, list=9%, signal=27%"   |                                  |                                  |             |       |
| GSE29618_PRE_VS_DAY7_FLU_VACCINE_PDC_DN        |                                   |                                  |                                  |             |       |
| GSE29618_PRE_VS_DAY7_FLU_VACCINE_PDC_DN        |                                   |                                  |                                  | 157         |       |
| 0.39555502                                     | 1.6694753                         | 0                                | 0.001784771                      |             | 0.687 |
| 2082                                           | "tags=32%, list=15%, signal=38%"  |                                  |                                  |             |       |
| GSE21360_NAIVE_VS_TERTIARY_MEMORY_CD8_TCELL_UP |                                   |                                  |                                  |             |       |
| GSE21360_NAIVE_VS_TERTIARY_MEMORY_CD8_TCELL_UP |                                   |                                  |                                  |             | 143   |
| 0.403636                                       | 1.6670755                         | 0                                | 0.001850933                      | 0.697       |       |
| 1938                                           | "tags=31%, list=14%, signal=35%"  |                                  |                                  |             |       |
| GSE21033_CTRL_VS_POLYIC_STIM_DC_3H_UP          |                                   |                                  |                                  |             |       |
| GSE21033_CTRL_VS_POLYIC_STIM_DC_3H_UP          |                                   |                                  |                                  | 137         |       |
| 0.40547243                                     | 1.6653861                         | 0                                | 0.00188874                       |             | 0.706 |
| 1571                                           | "tags=25%, list=11%, signal=28%"  |                                  |                                  |             |       |
| GSE42088_2H_VS_24H_LEISHMANIA_INF_DC_UP        |                                   |                                  |                                  |             |       |
| GSE42088_2H_VS_24H_LEISHMANIA_INF_DC_UP        |                                   |                                  |                                  | 140         |       |
| 0.40692842                                     | 1.6648823                         | 0                                | 0.001905659                      |             | 0.71  |
| 1800                                           | "tags=35%, list=13%, signal=40%"  |                                  |                                  |             |       |
| GSE17721_12H_VS_24H_LPS_BMDC_DN                | GSE17721_12H_VS_24H_LPS_BMDC_DN   |                                  |                                  |             |       |
| 148                                            | 0.39953494                        | 1.6645244                        | 0                                |             |       |
| 0.001916613                                    | 0.713                             | 2455                             | "tags=36%, list=17%, signal=43%" |             |       |
| GSE17721_POLYIC_VS_CPG_8H_BMDC_DN              | GSE17721_POLYIC_VS_CPG_8H_BMDC_DN |                                  |                                  |             |       |
| 145                                            | 0.4028562                         | 1.6640104                        | 0                                |             |       |
| 0.0019319                                      | 0.718                             | 2287                             | "tags=36%, list=16%, signal=42%" |             |       |
| GSE9988_LOW_LPS_VS_VEHICLE_TREATED_MONOCYTE_DN |                                   |                                  |                                  |             |       |
| GSE9988_LOW_LPS_VS_VEHICLE_TREATED_MONOCYTE_DN |                                   |                                  |                                  |             | 142   |
| 0.40699273                                     | 1.6637946                         | 0                                | 0.0019354                        |             | 0.719 |
| 2038                                           | "tags=32%, list=14%, signal=37%"  |                                  |                                  |             |       |
| GSE39152_CD103_NEG_VS_POS_MEMORY_CD8_TCELL_DN  |                                   |                                  |                                  |             |       |
| GSE39152_CD103_NEG_VS_POS_MEMORY_CD8_TCELL_DN  |                                   |                                  |                                  |             | 167   |
| 0.39314175                                     | 1.6635929                         | 0                                | 0.001934464                      |             | 0.72  |
| 2319                                           | "tags=36%, list=16%, signal=42%"  |                                  |                                  |             |       |
| GSE17721_POLYIC_VS_PAM3CSK4_12H_BMDC_UP        |                                   |                                  |                                  |             |       |
| GSE17721_POLYIC_VS_PAM3CSK4_12H_BMDC_UP        |                                   |                                  |                                  | 149         |       |
| 0.39869526                                     | 1.6613894                         | 0                                | 0.002005899                      |             | 0.73  |
| 2774                                           | "tags=36%, list=20%, signal=45%"  |                                  |                                  |             |       |
| GSE17721_CTRL_VS_CPG_12H_BMDC_UP               | GSE17721_CTRL_VS_CPG_12H_BMDC_UP  |                                  |                                  |             |       |
| 147                                            | 0.40156487                        | 1.660895                         | 0                                | 0.002019652 |       |
| 0.732                                          | 1967                              | "tags=33%, list=14%, signal=38%" |                                  |             |       |
| GSE360_T_GONDII_VS_B_MALAYI_LOW_DOSE_MAC_DN    |                                   |                                  |                                  |             |       |
| GSE360_T_GONDII_VS_B_MALAYI_LOW_DOSE_MAC_DN    |                                   |                                  |                                  |             | 156   |
| 0.40168065                                     | 1.6601593                         | 0                                | 0.002043698                      |             | 0.738 |
| 2517                                           | "tags=36%, list=18%, signal=43%"  |                                  |                                  |             |       |

|                                                                      |                                  |                                  |                                  |             |       |
|----------------------------------------------------------------------|----------------------------------|----------------------------------|----------------------------------|-------------|-------|
| GSE4142_PLASMA_CELL_VS_MEMORY_BCELL_DN                               |                                  |                                  |                                  |             |       |
| GSE4142_PLASMA_CELL_VS_MEMORY_BCELL_DN                               |                                  |                                  |                                  | 127         |       |
| 0.4093514                                                            | 1.6601583                        | 0                                | 0.00204114                       |             | 0.738 |
| 1961                                                                 | "tags=26%, list=14%, signal=30%" |                                  |                                  |             |       |
| GSE40666_UNTREATED_VS_IFNA_STIM_EFFECTOR_CD8_TCELL_90MIN_DN          |                                  |                                  |                                  |             |       |
| GSE40666_UNTREATED_VS_IFNA_STIM_EFFECTOR_CD8_TCELL_90MIN_DN          |                                  |                                  |                                  |             |       |
| 139                                                                  | 0.40393838                       | 1.6597878                        | 0                                | 0.00205335  |       |
| 0.741                                                                | 2569                             | "tags=44%, list=18%, signal=53%" |                                  |             |       |
| GSE15930_STIM_VS_STIM_AND_IL12_24H_CD8_T_CELL_UP                     |                                  |                                  |                                  |             |       |
| GSE15930_STIM_VS_STIM_AND_IL12_24H_CD8_T_CELL_UP                     |                                  |                                  |                                  |             | 163   |
| 0.39543566                                                           | 1.6593474                        | 0                                | 0.002062532                      |             | 0.742 |
| 1819                                                                 | "tags=27%, list=13%, signal=31%" |                                  |                                  |             |       |
| GSE5589_LPS_VS_LPS_AND_IL10_STIM_IL6_KO_MACROPHAGE_45MIN_DN          |                                  |                                  |                                  |             |       |
| GSE5589_LPS_VS_LPS_AND_IL10_STIM_IL6_KO_MACROPHAGE_45MIN_DN          |                                  |                                  |                                  |             |       |
| 148                                                                  | 0.40374503                       | 1.6587560                        | 0                                | 0.002087705 | 0.747 |
| 2470                                                                 | "tags=36%, list=18%, signal=43%" |                                  |                                  |             |       |
| GSE14769_40MIN_VS_360MIN_LPS_BMDM_UP                                 |                                  |                                  |                                  |             |       |
| GSE14769_40MIN_VS_360MIN_LPS_BMDM_UP                                 |                                  |                                  |                                  | 149         |       |
| 0.4036747                                                            | 1.6572652                        | 0                                | 0.002134848                      |             | 0.755 |
| 2243                                                                 | "tags=35%, list=16%, signal=41%" |                                  |                                  |             |       |
| GSE3982_NEUTROPHIL_VS_BCELL_DN                                       | GSE3982_NEUTROPHIL_VS_BCELL_DN   |                                  |                                  |             |       |
| 144                                                                  | 0.39491642                       | 1.6571921                        | 0                                |             |       |
| 0.002135076                                                          | 0.755                            | 1942                             | "tags=28%, list=14%, signal=33%" |             |       |
| GSE22886_CTRL_VS_LPS_24H_DC_UP                                       | GSE22886_CTRL_VS_LPS_24H_DC_UP   |                                  |                                  |             |       |
| 149                                                                  | 0.39823627                       | 1.6560014                        | 0                                |             |       |
| 0.002164385                                                          | 0.762                            | 2695                             | "tags=46%, list=19%, signal=56%" |             |       |
| GSE15139_GMCSF_TREATED_VS_UNTREATED_NEUTROPHILS_DN                   |                                  |                                  |                                  |             |       |
| GSE15139_GMCSF_TREATED_VS_UNTREATED_NEUTROPHILS_DN                   |                                  |                                  |                                  |             | 141   |
| 0.40373963                                                           | 1.6559271                        | 0                                | 0.00216314                       |             | 0.762 |
| 1559                                                                 | "tags=26%, list=11%, signal=29%" |                                  |                                  |             |       |
| GSE16451_IMMATURE_VS_MATURE_NEURON_CELL_LINE_WEST_EQUINE_ENC_VIRUS_U |                                  |                                  |                                  |             |       |
| P                                                                    |                                  |                                  |                                  |             |       |
| GSE16451_IMMATURE_VS_MATURE_NEURON_CELL_LINE_WEST_EQUINE_ENC_VIRUS_U |                                  |                                  |                                  |             |       |
| P                                                                    | 154                              | 0.39963052                       | 1.6545024                        | 0           |       |
| 0.002198177                                                          | 0.767                            | 2113                             | "tags=36%, list=15%, signal=42%" |             |       |
| GSE4748_CTRL_VS_CYANOBACTERIUM_LPслиKE_STIM_DC_3H_DN                 |                                  |                                  |                                  |             |       |
| GSE4748_CTRL_VS_CYANOBACTERIUM_LPслиKE_STIM_DC_3H_DN                 |                                  |                                  |                                  |             |       |
| 152                                                                  | 0.40034512                       | 1.6544784                        | 0                                | 0.002198324 |       |
| 0.767                                                                | 1944                             | "tags=34%, list=14%, signal=39%" |                                  |             |       |
| GSE27786_CD8_TCELL_VS_NEUTROPHIL_DN                                  |                                  |                                  |                                  |             |       |
| GSE27786_CD8_TCELL_VS_NEUTROPHIL_DN                                  |                                  |                                  |                                  | 137         |       |
| 0.40690175                                                           | 1.6532074                        | 0                                | 0.002236068                      |             | 0.771 |
| 1594                                                                 | "tags=23%, list=11%, signal=25%" |                                  |                                  |             |       |
| GSE27241_WT_VS_RORGT_KO_TH17_POLARIZED_CD4_TCELL_DN                  |                                  |                                  |                                  |             |       |
| GSE27241_WT_VS_RORGT_KO_TH17_POLARIZED_CD4_TCELL_DN                  |                                  |                                  |                                  |             |       |
| 137                                                                  | 0.40092307                       | 1.6522043                        | 0                                | 0.002272544 |       |
| 0.774                                                                | 2630                             | "tags=38%, list=19%, signal=46%" |                                  |             |       |
| GSE41867_LCMV_ARMSTRONG_VS_CLONE13_DAY6_EFFECTOR_CD8_TCELL_DN        |                                  |                                  |                                  |             |       |
| GSE41867_LCMV_ARMSTRONG_VS_CLONE13_DAY6_EFFECTOR_CD8_TCELL_DN        |                                  |                                  |                                  |             |       |
| 157                                                                  | 0.39017788                       | 1.6510258                        | 0                                |             |       |
| 0.002311709                                                          | 0.779                            | 2354                             | "tags=38%, list=17%, signal=45%" |             |       |
| GSE5099_UNSTIM_VS_MCSF_TREATED_MONOCYTE_DAY3_DN                      |                                  |                                  |                                  |             |       |
| GSE5099_UNSTIM_VS_MCSF_TREATED_MONOCYTE_DAY3_DN                      |                                  |                                  |                                  |             | 138   |
| 0.40406725                                                           | 1.6508970                        | 0.002173913                      | 0.002311713                      |             | 0.779 |

2136 "tags=36%, list=15%, signal=41%"  
GSE16266\_CTRL\_VS\_HEATSHOCK\_AND\_LPS\_STIM\_MEF\_DN  
GSE16266\_CTRL\_VS\_HEATSHOCK\_AND\_LPS\_STIM\_MEF\_DN 160  
0.39039952 1.6508685 0.002188184 0.00230887  
0.779 2533 "tags=41%, list=18%, signal=49%"  
GSE3982\_NEUTROPHIL\_VS\_TH2\_DN GSE3982\_NEUTROPHIL\_VS\_TH2\_DN  
146 0.39831328 1.6505935 0  
0.002323301 0.781 2115 "tags=32%, list=15%, signal=37%"  
GSE27859\_MACROPHAGE\_VS\_CD11C\_INT\_F480\_INT\_DC\_DN  
GSE27859\_MACROPHAGE\_VS\_CD11C\_INT\_F480\_INT\_DC\_DN 144  
0.39851877 1.6497011 0 0.00233915 0.785  
2035 "tags=26%, list=14%, signal=31%"  
GSE21360\_PRIMARY\_VS\_TERTIARY\_MEMORY\_CD8\_TCELL\_UP  
GSE21360\_PRIMARY\_VS\_TERTIARY\_MEMORY\_CD8\_TCELL\_UP 155  
0.39697072 1.6495892 0 0.002337684 0.785  
1726 "tags=28%, list=12%, signal=32%"  
GSE3982\_MAC\_VS\_EFF\_MEMORY\_CD4\_TCELL\_UP  
GSE3982\_MAC\_VS\_EFF\_MEMORY\_CD4\_TCELL\_UP 149  
0.39675793 1.6491838 0 0.002353412 0.789  
2079 "tags=32%, list=15%, signal=37%"  
GSE6674\_ANTI\_IGM\_VS\_PL2\_3\_STIM\_BCELL\_DN  
GSE6674\_ANTI\_IGM\_VS\_PL2\_3\_STIM\_BCELL\_DN 152  
0.3978387 1.6491628 0 0.002350535 0.789  
2420 "tags=36%, list=17%, signal=43%"  
GSE17721\_12H\_VS\_24H\_CPG\_BMDC\_DN GSE17721\_12H\_VS\_24H\_CPG\_BMDC\_DN  
167 0.39008898 1.6485603 0  
0.002366343 0.791 2424 "tags=35%, list=17%, signal=41%"  
GSE8621\_LPS\_STIM\_VS\_LPS\_PRIMED\_AND\_LPS\_STIM\_MACROPHAGE\_DN  
GSE8621\_LPS\_STIM\_VS\_LPS\_PRIMED\_AND\_LPS\_STIM\_MACROPHAGE\_DN  
150 0.3964257 1.6479819 0.002118644  
0.002377595 0.793 1849 "tags=29%, list=13%, signal=33%"  
GSE13411\_NAIVE\_BCELL\_VS\_PLASMA\_CELL\_DN  
GSE13411\_NAIVE\_BCELL\_VS\_PLASMA\_CELL\_DN 137  
0.40354884 1.646439 0 0.002433263 0.802  
1896 "tags=28%, list=13%, signal=32%"  
GSE16386\_IL4\_VS\_IL4\_AND\_ROSIGLITAZONE\_STIM\_MACROPHAGE\_6H\_UP  
GSE16386\_IL4\_VS\_IL4\_AND\_ROSIGLITAZONE\_STIM\_MACROPHAGE\_6H\_UP  
147 0.39909658 1.6438304 0 0.002544415  
0.821 1893 "tags=28%, list=13%, signal=32%"  
GSE28237\_FOLLICULAR\_VS\_LATE\_GC\_BCELL\_DN  
GSE28237\_FOLLICULAR\_VS\_LATE\_GC\_BCELL\_DN 136  
0.40245262 1.6436623 0 0.002547042 0.822  
2332 "tags=34%, list=17%, signal=40%"  
GSE16385\_MONOCYTE\_VS\_12H\_ROSIGLITAZONE\_TREATED\_MACROPHAGE\_DN  
GSE16385\_MONOCYTE\_VS\_12H\_ROSIGLITAZONE\_TREATED\_MACROPHAGE\_DN  
139 0.3934993 1.6428907 0  
0.002588044 0.823 2268 "tags=32%, list=16%, signal=37%"  
GSE36826\_NORMAL\_VS\_STAPH\_AUREUS\_INF\_SKIN\_UP  
GSE36826\_NORMAL\_VS\_STAPH\_AUREUS\_INF\_SKIN\_UP 145  
0.39588204 1.6423053 0 0.002604928 0.826  
2251 "tags=37%, list=16%, signal=44%"  
GSE3337\_4H\_VS\_16H\_IFNG\_IN\_CD8POS\_DC\_UP  
GSE3337\_4H\_VS\_16H\_IFNG\_IN\_CD8POS\_DC\_UP 164  
0.38953173 1.6418883 0 0.002608912 0.827

2692 "tags=42%, list=19%, signal=51%"  
 GSE17721\_PAM3CSK4\_VS\_GADIQUIMOD\_8H\_BMDC\_UP  
 GSE17721\_PAM3CSK4\_VS\_GADIQUIMOD\_8H\_BMDC\_UP 154  
 0.39136842 1.6409181 0 0.002649803 0.836  
 2450 "tags=34%, list=17%, signal=41%"  
 GSE2770\_UNTREATED\_VS\_ACT\_CD4\_TCELL\_48H\_UP  
 GSE2770\_UNTREATED\_VS\_ACT\_CD4\_TCELL\_48H\_UP 139  
 0.40148538 1.640356 0 0.002663592 0.838  
 2520 "tags=35%, list=18%, signal=42%"  
 GSE32034\_LY6C\_HIGH\_VS\_LOW\_MONOCYTE\_UP  
 GSE32034\_LY6C\_HIGH\_VS\_LOW\_MONOCYTE\_UP 165  
 0.39113885 1.6400716 0 0.002674405 0.839  
 2100 "tags=27%, list=15%, signal=32%"  
 GSE24634\_IL4\_VS\_CTRL\_TREATED\_NAIVE\_CD4\_TCELL\_DAY10\_UP  
 GSE24634\_IL4\_VS\_CTRL\_TREATED\_NAIVE\_CD4\_TCELL\_DAY10\_UP  
 143 0.39477932 1.640054 0.002123142 0.002671183  
 0.839 1432 "tags=24%, list=10%, signal=27%"  
 GSE2770\_TGFB\_AND\_IL4\_ACT\_VS\_ACT\_CD4\_TCELL\_6H\_UP  
 GSE2770\_TGFB\_AND\_IL4\_ACT\_VS\_ACT\_CD4\_TCELL\_6H\_UP 129  
 0.40277904 1.6396914 0.00209205 0.002680708  
 0.841 2535 "tags=40%, list=18%, signal=48%"  
 GSE2770\_TGFB\_AND\_IL4\_VS\_IL4\_TREATED\_ACT\_CD4\_TCELL\_48H\_DN  
 GSE2770\_TGFB\_AND\_IL4\_VS\_IL4\_TREATED\_ACT\_CD4\_TCELL\_48H\_DN  
 137 0.39950135 1.6392814 0 0.002690102  
 0.844 2267 "tags=32%, list=16%, signal=38%"  
 GSE36392\_TYPE\_2\_MYELOID\_VS\_NEUTROPHIL\_IL25\_TREATED\_LUNG\_DN  
 GSE36392\_TYPE\_2\_MYELOID\_VS\_NEUTROPHIL\_IL25\_TREATED\_LUNG\_DN  
 148 0.39337125 1.6384743 0.002061856  
 0.00272073 0.852 1742 "tags=29%, list=12%, signal=33%"  
 GSE3920\_UNTREATED\_VS\_IFNG\_TREATED\_FIBROBLAST\_UP  
 GSE3920\_UNTREATED\_VS\_IFNG\_TREATED\_FIBROBLAST\_UP 127  
 0.3985585 1.6379663 0.002232143 0.00273276  
 0.856 3116 "tags=43%, list=22%, signal=55%"  
 GSE7460\_CTRL\_VS\_TGFB\_TREATED\_ACT\_CD8\_TCELL\_UP  
 GSE7460\_CTRL\_VS\_TGFB\_TREATED\_ACT\_CD8\_TCELL\_UP 159  
 0.3912897 1.6363578 0 0.002806778 0.863  
 1529 "tags=28%, list=11%, signal=31%"  
 GSE15659\_RESTING\_VS\_ACTIVATED\_TREG\_DN  
 GSE15659\_RESTING\_VS\_ACTIVATED\_TREG\_DN 138  
 0.3991642 1.6360871 0.002188184 0.002811827  
 0.864 1969 "tags=25%, list=14%, signal=29%"  
 GSE22611\_NOD2\_VS\_CTRL\_TRANSDUCED\_HEK293T\_CELL\_UP  
 GSE22611\_NOD2\_VS\_CTRL\_TRANSDUCED\_HEK293T\_CELL\_UP 132  
 0.40087894 1.6354123 0 0.002844962 0.867  
 2059 "tags=31%, list=15%, signal=36%"  
 GSE339\_CD4POS\_VS\_CD4CD8DN\_DC\_DN GSE339\_CD4POS\_VS\_CD4CD8DN\_DC\_DN  
 149 0.39151677 1.6353862 0  
 0.002841567 0.867 1991 "tags=33%, list=14%, signal=38%"  
 GSE15139\_GMCSF\_TREATED\_VS\_UNTREATED\_NEUTROPHILS\_UP  
 GSE15139\_GMCSF\_TREATED\_VS\_UNTREATED\_NEUTROPHILS\_UP 139  
 0.40574816 1.633755 0.002169197 0.002902563 0.871  
 2502 "tags=37%, list=18%, signal=44%"  
 GSE37416\_CTRL\_VS\_12H\_F\_TULARENSIS\_LVS\_NEUTROPHIL\_UP  
 GSE37416\_CTRL\_VS\_12H\_F\_TULARENSIS\_LVS\_NEUTROPHIL\_UP

|                                                                      |                                  |                                  |                                  |                                 |       |
|----------------------------------------------------------------------|----------------------------------|----------------------------------|----------------------------------|---------------------------------|-------|
| 134                                                                  | 0.3994707                        | 1.6336013                        | 0                                | 0.002904693                     |       |
| 0.871                                                                | 2345                             | "tags=39%, list=17%, signal=46%" |                                  |                                 |       |
| GSE19888_ADENOSINE_A3R_INH_VS_ACT_IN_MAST_CELL_UP                    |                                  |                                  |                                  |                                 |       |
| GSE19888_ADENOSINE_A3R_INH_VS_ACT_IN_MAST_CELL_UP                    |                                  |                                  |                                  |                                 |       |
|                                                                      |                                  |                                  |                                  |                                 | 128   |
| 0.40717515                                                           | 1.6334791                        | 0                                | 0.00291519                       | 0.872                           |       |
| 2658                                                                 | "tags=36%, list=19%, signal=44%" |                                  |                                  |                                 |       |
| GSE17186_MEMORY_VS_NAIVE_BCELL_DN GSE17186_MEMORY_VS_NAIVE_BCELL_DN  |                                  |                                  |                                  |                                 |       |
|                                                                      | 144                              | 0.3997855                        | 1.6332204                        | 0                               |       |
| 0.002927192                                                          | 0.874                            | 2040                             | "tags=33%, list=14%, signal=38%" |                                 |       |
| GSE2197_IMMUNOSUPPRESSIVE_DNA_VS_UNTREATEDIN_DC_DN                   |                                  |                                  |                                  |                                 |       |
| GSE2197_IMMUNOSUPPRESSIVE_DNA_VS_UNTREATEDIN_DC_DN                   |                                  |                                  |                                  |                                 |       |
|                                                                      |                                  |                                  |                                  |                                 | 150   |
| 0.39348012                                                           | 1.6330047                        | 0                                | 0.002932109                      | 0.874                           |       |
| 1423                                                                 | "tags=24%, list=10%, signal=26%" |                                  |                                  |                                 |       |
| GSE2770_UNTREATED_VS_IL12_TREATED_ACT_CD4_TCELL_2H_DN                |                                  |                                  |                                  |                                 |       |
| GSE2770_UNTREATED_VS_IL12_TREATED_ACT_CD4_TCELL_2H_DN                |                                  |                                  |                                  |                                 |       |
| 145                                                                  | 0.39449406                       | 1.6322846                        | 0.002083333                      |                                 |       |
| 0.002968958                                                          | 0.876                            | 1416                             | "tags=24%, list=10%, signal=27%" |                                 |       |
| GSE22886_DAY0_VS_DAY7_MONOCYTE_IN_CULTURE_DN                         |                                  |                                  |                                  |                                 |       |
| GSE22886_DAY0_VS_DAY7_MONOCYTE_IN_CULTURE_DN                         |                                  |                                  |                                  |                                 |       |
|                                                                      |                                  |                                  |                                  |                                 | 148   |
| 0.39493406                                                           | 1.6311857                        | 0                                | 0.003018114                      | 0.879                           |       |
| 2400                                                                 | "tags=37%, list=17%, signal=44%" |                                  |                                  |                                 |       |
| GSE360_CTRL_VS_B_MALAYI_HIGH_DOSE_DC_UP                              |                                  |                                  |                                  |                                 |       |
| GSE360_CTRL_VS_B_MALAYI_HIGH_DOSE_DC_UP                              |                                  |                                  |                                  |                                 |       |
|                                                                      |                                  |                                  |                                  |                                 | 141   |
| 0.39197615                                                           | 1.6311277                        | 0                                | 0.003017334                      | 0.879                           |       |
| 2407                                                                 | "tags=31%, list=17%, signal=37%" |                                  |                                  |                                 |       |
| GSE22935_24H_VS_48H_MBOVIS_BCG_STIM_MACROPHAGE_DN                    |                                  |                                  |                                  |                                 |       |
| GSE22935_24H_VS_48H_MBOVIS_BCG_STIM_MACROPHAGE_DN                    |                                  |                                  |                                  |                                 |       |
|                                                                      |                                  |                                  |                                  |                                 | 145   |
| 0.3953061                                                            | 1.6309007                        | 0.006097561                      | 0.003020702                      |                                 |       |
| 0.88                                                                 | 1833                             | "tags=30%, list=13%, signal=34%" |                                  |                                 |       |
| GSE10147_IL3_VS_IL3_AND_CPG_STIM_PDC_UP                              |                                  |                                  |                                  |                                 |       |
| GSE10147_IL3_VS_IL3_AND_CPG_STIM_PDC_UP                              |                                  |                                  |                                  |                                 |       |
|                                                                      |                                  |                                  |                                  |                                 | 105   |
| 0.41394234                                                           | 1.6299044                        | 0                                | 0.003061413                      | 0.882                           |       |
| 1892                                                                 | "tags=23%, list=13%, signal=26%" |                                  |                                  |                                 |       |
| GSE17721_CTRL_VS_GARDIQUIMOD_8H_BMDC_UP                              |                                  |                                  |                                  |                                 |       |
| GSE17721_CTRL_VS_GARDIQUIMOD_8H_BMDC_UP                              |                                  |                                  |                                  |                                 |       |
|                                                                      |                                  |                                  |                                  |                                 | 149   |
| 0.3934003                                                            | 1.6293012                        | 0                                | 0.0030814                        | 0.882                           |       |
| 1636                                                                 | "tags=26%, list=12%, signal=29%" |                                  |                                  |                                 |       |
| GSE17721_CTRL_VS_LPS_0.5H_BMDC_UP GSE17721_CTRL_VS_LPS_0.5H_BMDC_UP  |                                  |                                  |                                  |                                 |       |
|                                                                      | 152                              | 0.3958024                        | 1.6278028                        | 0.002079002                     |       |
| 0.003153861                                                          | 0.886                            | 2251                             | "tags=32%, list=16%, signal=38%" |                                 |       |
| GSE2770_TGFB_AND_IL4_VS_IL12_TREATED_ACT_CD4_TCELL_48H_UP            |                                  |                                  |                                  |                                 |       |
| GSE2770_TGFB_AND_IL4_VS_IL12_TREATED_ACT_CD4_TCELL_48H_UP            |                                  |                                  |                                  |                                 |       |
| 148                                                                  | 0.39111575                       | 1.626573                         | 0                                | 0.0032219                       | 0.895 |
| 2065                                                                 | "tags=29%, list=15%, signal=34%" |                                  |                                  |                                 |       |
| GSE411_100MIN_VS_400MIN_IL6_STIM_MACROPHAGE_DN                       |                                  |                                  |                                  |                                 |       |
| GSE411_100MIN_VS_400MIN_IL6_STIM_MACROPHAGE_DN                       |                                  |                                  |                                  |                                 |       |
|                                                                      |                                  |                                  |                                  |                                 | 140   |
| 0.40027145                                                           | 1.6262382                        | 0.002132196                      | 0.003242768                      |                                 |       |
| 0.896                                                                | 1976                             | "tags=34%, list=14%, signal=39%" |                                  |                                 |       |
| GSE12963_UNINF_VS_ENV_AND_NEF_AND_VPR_DEFICIENT_HIV1_INF_CD4_TCELL_D |                                  |                                  |                                  |                                 |       |
| N                                                                    |                                  |                                  |                                  |                                 |       |
| GSE12963_UNINF_VS_ENV_AND_NEF_AND_VPR_DEFICIENT_HIV1_INF_CD4_TCELL_D |                                  |                                  |                                  |                                 |       |
| N                                                                    |                                  |                                  |                                  |                                 |       |
|                                                                      | 109                              | 0.4120101                        | 1.6254516                        |                                 |       |
| 0.006147541                                                          | 0.003273259                      | 0.902                            | 965                              | "tags=17%, list=7%, signal=18%" |       |

|                                                                |                                   |                                  |                                  |       |
|----------------------------------------------------------------|-----------------------------------|----------------------------------|----------------------------------|-------|
| GSE21927_SPLEEN_VS_BONE_MARROW_MONOCYTE_BALBC_DN               |                                   |                                  |                                  |       |
| GSE21927_SPLEEN_VS_BONE_MARROW_MONOCYTE_BALBC_DN               |                                   |                                  |                                  | 136   |
| 0.39359236                                                     | 1.6249193                         | 0                                | 0.003298145                      | 0.906 |
| 1806                                                           | "tags=26%, list=13%, signal=29%"  |                                  |                                  |       |
| GSE13484_UNSTIM_VS_YF17D_VACCINE_STIM_PBMC_UP                  |                                   |                                  |                                  |       |
| GSE13484_UNSTIM_VS_YF17D_VACCINE_STIM_PBMC_UP                  |                                   |                                  |                                  | 151   |
| 0.39350766                                                     | 1.6246483                         | 0                                | 0.003303936                      | 0.906 |
| 2169                                                           | "tags=36%, list=15%, signal=43%"  |                                  |                                  |       |
| GSE11973_MIR223_KOVS_WT_BONE_MARROW_NEUTROPHIL_DN              |                                   |                                  |                                  |       |
| GSE11973_MIR223_KOVS_WT_BONE_MARROW_NEUTROPHIL_DN              |                                   |                                  |                                  | 132   |
| 0.3991157                                                      | 1.6235609                         | 0                                | 0.003345289                      | 0.908 |
| 2132                                                           | "tags=34%, list=15%, signal=40%"  |                                  |                                  |       |
| GSE11924_TFH_VS_TH17_CD4_TCELL_DN                              | GSE11924_TFH_VS_TH17_CD4_TCELL_DN |                                  |                                  |       |
| 147                                                            | 0.39395916                        | 1.6219261                        | 0                                |       |
| 0.003423609                                                    | 0.913                             | 1957                             | "tags=29%, list=14%, signal=33%" |       |
| GSE17721_LPS_VS_CPG_8H_BMDC_DN                                 | GSE17721_LPS_VS_CPG_8H_BMDC_DN    |                                  |                                  |       |
| 148                                                            | 0.38957724                        | 1.6216499                        | 0                                |       |
| 0.003425057                                                    | 0.913                             | 2414                             | "tags=34%, list=17%, signal=40%" |       |
| GSE4811_CLASSICALY_ACTIVATED_VS_TYPE_2_ACTIVATED_MACROPHAGE_UP |                                   |                                  |                                  |       |
| GSE4811_CLASSICALY_ACTIVATED_VS_TYPE_2_ACTIVATED_MACROPHAGE_UP |                                   |                                  |                                  |       |
| 127                                                            | 0.40103006                        | 1.6213571                        | 0                                |       |
| 0.003431873                                                    | 0.913                             | 2061                             | "tags=24%, list=15%, signal=28%" |       |
| GSE43955_1H_VS_42H_ACT_CD4_TCELL_UP                            |                                   |                                  |                                  |       |
| GSE43955_1H_VS_42H_ACT_CD4_TCELL_UP                            |                                   |                                  |                                  | 157   |
| 0.38821235                                                     | 1.6209820                         | 0.003447009                      | 0.914                            |       |
| 1616                                                           | "tags=27%, list=11%, signal=31%"  |                                  |                                  |       |
| GSE37532_TREG_VS_TCONV_PPARG_KO_CD4_TCELL_FROM_LN_DN           |                                   |                                  |                                  |       |
| GSE37532_TREG_VS_TCONV_PPARG_KO_CD4_TCELL_FROM_LN_DN           |                                   |                                  |                                  |       |
| 143                                                            | 0.39377517                        | 1.6205546                        | 0.004115226                      |       |
| 0.003460759                                                    | 0.916                             | 2238                             | "tags=34%, list=16%, signal=39%" |       |
| GSE3039_CD4_TCELL_VS_B1_BCELL_UP                               | GSE3039_CD4_TCELL_VS_B1_BCELL_UP  |                                  |                                  |       |
| 133                                                            | 0.39526033                        | 1.6200204                        | 0                                |       |
| 0.00348394                                                     | 0.918                             | 1153                             | "tags=23%, list=8%, signal=24%"  |       |
| GSE27786_BCELL_VS_CD8_TCELL_UP                                 | GSE27786_BCELL_VS_CD8_TCELL_UP    |                                  |                                  |       |
| 155                                                            | 0.38549417                        | 1.6198395                        | 0                                |       |
| 0.003490862                                                    | 0.919                             | 2119                             | "tags=33%, list=15%, signal=38%" |       |
| GSE45365_WT_VS_IFNAR_KO_CD8A_DC_UP                             |                                   |                                  |                                  |       |
| GSE45365_WT_VS_IFNAR_KO_CD8A_DC_UP                             |                                   |                                  |                                  | 144   |
| 0.3905321                                                      | 1.6195624                         | 0                                | 0.003503158                      | 0.92  |
| 2292                                                           | "tags=31%, list=16%, signal=37%"  |                                  |                                  |       |
| GSE17721_0.5H_VS_4H_LPS_BMDC_UP                                | GSE17721_0.5H_VS_4H_LPS_BMDC_UP   |                                  |                                  |       |
| 145                                                            | 0.39064533                        | 1.6182834                        | 0                                |       |
| 0.003565554                                                    | 0.926                             | 1961                             | "tags=31%, list=14%, signal=36%" |       |
| GSE27786_LSK_VS_MONO_MAC_DN                                    | GSE27786_LSK_VS_MONO_MAC_DN       |                                  |                                  |       |
| 141                                                            | 0.3953705                         | 1.6181072                        | 0.002118644                      |       |
| 0.003576368                                                    | 0.926                             | 2479                             | "tags=30%, list=18%, signal=37%" |       |
| GSE3982_MAST_CELL_VS_NEUTROPHIL_UP                             |                                   |                                  |                                  |       |
| GSE3982_MAST_CELL_VS_NEUTROPHIL_UP                             |                                   |                                  |                                  | 148   |
| 0.3888645                                                      | 1.6178743                         | 0.002159827                      | 0.003582984                      |       |
| 0.926                                                          | 2416                              | "tags=33%, list=17%, signal=40%" |                                  |       |
| GSE3039_ALPHAALPHA_CD8_TCELL_VS_B1_BCELL_DN                    |                                   |                                  |                                  |       |
| GSE3039_ALPHAALPHA_CD8_TCELL_VS_B1_BCELL_DN                    |                                   |                                  |                                  | 156   |
| 0.38607946                                                     | 1.6157236                         | 0                                | 0.003721132                      | 0.932 |
| 2224                                                           | "tags=31%, list=16%, signal=36%"  |                                  |                                  |       |

GSE2405\_S\_AUREUS\_VS\_UNTREATED\_NEUTROPHIL\_UP  
GSE2405\_S\_AUREUS\_VS\_UNTREATED\_NEUTROPHIL\_UP 143  
0.39132708 1.6144985 0.00204499 0.003777804  
0.937 1613 "tags=29%, list=11%, signal=33%"  
GSE18281\_PERIMEDULLARY\_CORTICAL\_REGION\_VS\_WHOLE\_CORTEX\_THYMUS\_UP  
GSE18281\_PERIMEDULLARY\_CORTICAL\_REGION\_VS\_WHOLE\_CORTEX\_THYMUS\_UP  
148 0.38769075 1.6141427 0.004545454  
0.003785686 0.937 1556 "tags=20%, list=11%, signal=23%"  
GSE2706\_UNSTIM\_VS\_8H\_LPS\_AND\_R848\_DC\_UP  
GSE2706\_UNSTIM\_VS\_8H\_LPS\_AND\_R848\_DC\_UP 141  
0.39732048 1.614061 0.002087683 0.003782659 0.937  
1470 "tags=27%, list=10%, signal=30%"  
GSE17721\_CTRL\_VS\_LPS\_12H\_BMDC\_UP GSE17721\_CTRL\_VS\_LPS\_12H\_BMDC\_UP  
134 0.3948602 1.613763 0.002132196  
0.003790489 0.938 1864 "tags=31%, list=13%, signal=35%"  
GSE27786\_LSK\_VS\_CD8\_TCELL\_DN GSE27786\_LSK\_VS\_CD8\_TCELL\_DN  
147 0.3883621 1.6137587 0.002024292  
0.003786147 0.938 2638 "tags=37%, list=19%, signal=45%"  
GSE16385\_IFNG\_TNF\_VS\_ROSIGLITAZONE\_STIM\_MACROPHAGE\_UP  
GSE16385\_IFNG\_TNF\_VS\_ROSIGLITAZONE\_STIM\_MACROPHAGE\_UP  
104 0.41094086 1.6134864 0 0.00379389  
0.938 1322 "tags=21%, list=9%, signal=23%"  
GSE25087\_FETAL\_VS\_ADULT\_TREG\_UP GSE25087\_FETAL\_VS\_ADULT\_TREG\_UP  
146 0.39203328 1.613439 0 0.003793564  
0.938 1798 "tags=30%, list=13%, signal=34%"  
GSE17721\_LPS\_VS\_POLYIC\_4H\_BMDC\_DN GSE17721\_LPS\_VS\_POLYIC\_4H\_BMDC\_DN  
147 0.3894305 1.6131132 0  
0.003812082 0.938 2315 "tags=32%, list=16%, signal=38%"  
GSE17721\_4H\_VS\_24H\_POLYIC\_BMDC\_UP GSE17721\_4H\_VS\_24H\_POLYIC\_BMDC\_UP  
152 0.38548696 1.612087 0.00203666  
0.003857312 0.941 2122 "tags=29%, list=15%, signal=34%"  
GSE13484\_UNSTIM\_VS\_3H\_YF17D\_VACCINE\_STIM\_PBMC\_UP  
GSE13484\_UNSTIM\_VS\_3H\_YF17D\_VACCINE\_STIM\_PBMC\_UP 143  
0.3907611 1.6116444 0.004291846 0.003866295  
0.942 2466 "tags=38%, list=17%, signal=45%"  
GSE28726\_NAIVE\_VS\_ACTIVATED\_VA24NEG\_NKTCELL\_UP  
GSE28726\_NAIVE\_VS\_ACTIVATED\_VA24NEG\_NKTCELL\_UP 148  
0.38965556 1.6111498 0 0.003879169 0.943  
2424 "tags=36%, list=17%, signal=44%"  
GSE12845\_IGD\_NEG\_BLOOD\_VS\_DARKZONE\_GC\_TONSIL\_BCELL\_UP  
GSE12845\_IGD\_NEG\_BLOOD\_VS\_DARKZONE\_GC\_TONSIL\_BCELL\_UP  
131 0.393278 1.6109782 0.002105263 0.003892046  
0.943 2511 "tags=34%, list=18%, signal=41%"  
GSE17721\_POLYIC\_VS\_GARDIQUIMOD\_16H\_BMDC\_DN  
GSE17721\_POLYIC\_VS\_GARDIQUIMOD\_16H\_BMDC\_DN 145  
0.38626373 1.6108457 0 0.003900915 0.943  
2767 "tags=41%, list=20%, signal=51%"  
GSE20366\_TREG\_VS\_NAIVE\_CD4\_TCELL\_HOMEOSTATIC\_CONVERSION\_UP  
GSE20366\_TREG\_VS\_NAIVE\_CD4\_TCELL\_HOMEOSTATIC\_CONVERSION\_UP  
136 0.39033934 1.6097414 0 0.003969482  
0.947 1538 "tags=25%, list=11%, signal=28%"  
GSE360\_CTRL\_VS\_B\_MALAYI\_LOW\_DOSE\_MAC\_DN  
GSE360\_CTRL\_VS\_B\_MALAYI\_LOW\_DOSE\_MAC\_DN 146  
0.38921034 1.6095587 0 0.003976833 0.947



2228 "tags=29%, list=16%, signal=35%"  
 GSE12366\_PLASMA\_CELL\_VS\_NAIVE\_BCELL\_DN  
 GSE12366\_PLASMA\_CELL\_VS\_NAIVE\_BCELL\_DN 137  
 0.39313376 1.6084342 0 0.004029412 0.95  
 2409 "tags=37%, list=17%, signal=44%"  
 GSE2770\_IL12\_AND\_TGFB\_ACT\_VS\_ACT\_CD4\_TCELL\_48H\_DN  
 GSE2770\_IL12\_AND\_TGFB\_ACT\_VS\_ACT\_CD4\_TCELL\_48H\_DN 142  
 0.38925847 1.6083995 0.006289308 0.004027526  
 0.95 2159 "tags=30%, list=15%, signal=35%"  
 GSE9988\_LPS\_VS\_VEHICLE\_TREATED\_MONOCYTE\_DN  
 GSE9988\_LPS\_VS\_VEHICLE\_TREATED\_MONOCYTE\_DN 144 0.389405  
 1.6079671 0 0.004052085 0.95  
 2068 "tags=31%, list=15%, signal=36%"  
 GSE20366\_EX\_VIVO\_VS\_HOMEOSTATIC\_CONVERSION\_NAIVE\_CD4\_TCELL\_DN  
 GSE20366\_EX\_VIVO\_VS\_HOMEOSTATIC\_CONVERSION\_NAIVE\_CD4\_TCELL\_DN  
 139 0.39268816 1.6078452 0  
 0.004051467 0.95 2150 "tags=27%, list=15%, signal=32%"  
 GSE3982\_CTRL\_VS\_PMA\_STIM\_EOSINOPHIL\_UP  
 GSE3982\_CTRL\_VS\_PMA\_STIM\_EOSINOPHIL\_UP 140  
 0.39297825 1.6070946 0 0.004081287 0.95  
 2421 "tags=31%, list=17%, signal=37%"  
 GSE17721\_POLYIC\_VS\_PAM3CSK4\_1H\_BMDC\_UP  
 GSE17721\_POLYIC\_VS\_PAM3CSK4\_1H\_BMDC\_UP 159  
 0.38778433 1.6065366 0 0.004108289 0.95  
 2411 "tags=33%, list=17%, signal=40%"  
 GSE36476\_CTRL\_VS\_TSST\_ACT\_16H\_MEMORY\_CD4\_TCELL\_YOUNG\_DN  
 GSE36476\_CTRL\_VS\_TSST\_ACT\_16H\_MEMORY\_CD4\_TCELL\_YOUNG\_DN  
 143 0.3904821 1.6065135 0 0.004105007  
 0.95 2546 "tags=37%, list=18%, signal=45%"  
 GSE2826\_XID\_VS\_BTK\_KO\_BCELL\_DN GSE2826\_XID\_VS\_BTK\_KO\_BCELL\_DN  
 162 0.3865051 1.6058632 0  
 0.004147855 0.951 2355 "tags=34%, list=17%, signal=40%"  
 GSE39152\_BRAIN\_VS\_SPLEEN\_CD103\_NEG\_MEMORY\_CD8\_TCELL\_UP  
 GSE39152\_BRAIN\_VS\_SPLEEN\_CD103\_NEG\_MEMORY\_CD8\_TCELL\_UP  
 147 0.38968107 1.6056709 0 0.0041525  
 0.951 2300 "tags=40%, list=16%, signal=47%"  
 GSE13522\_WT\_VS\_IFNAR\_KO\_SKIN\_DN GSE13522\_WT\_VS\_IFNAR\_KO\_SKIN\_DN  
 137 0.39430356 1.6050111 0.004264392  
 0.004181945 0.952 2269 "tags=42%, list=16%, signal=49%"  
 GSE7548\_DAY7\_VS\_DAY28\_PCC\_IMMUNIZATION\_CD4\_TCELL\_DN  
 GSE7548\_DAY7\_VS\_DAY28\_PCC\_IMMUNIZATION\_CD4\_TCELL\_DN  
 146 0.39147007 1.6045696 0 0.004202084  
 0.953 1190 "tags=23%, list=8%, signal=24%"  
 GSE22527\_ANTI\_CD3\_INVIVO\_VS\_UNTREATED\_MOUSE\_TREG\_DN  
 GSE22527\_ANTI\_CD3\_INVIVO\_VS\_UNTREATED\_MOUSE\_TREG\_DN  
 142 0.39081922 1.6041591 0.00409836  
 0.004225025 0.954 2157 "tags=31%, list=15%, signal=36%"  
 GSE22886\_CD8\_TCELL\_VS\_BCELL\_NAIVE\_UP  
 GSE22886\_CD8\_TCELL\_VS\_BCELL\_NAIVE\_UP 159  
 0.3843783 1.6038197 0.002012072 0.00425811  
 0.955 2046 "tags=37%, list=14%, signal=43%"  
 GSE8685\_IL15\_ACT\_IL2\_STARVED\_VS\_IL21\_ACT\_IL2\_STARVED\_CD4\_TCELL\_UP  
 GSE8685\_IL15\_ACT\_IL2\_STARVED\_VS\_IL21\_ACT\_IL2\_STARVED\_CD4\_TCELL\_UP  
 134 0.39265716 1.6036698 0

0.00426918 0.955 2330 "tags=31%, list=17%, signal=36%"  
GSE360\_L\_DONOVANI\_VS\_B\_MALAYI\_HIGH\_DOSE\_MAC\_DN  
GSE360\_L\_DONOVANI\_VS\_B\_MALAYI\_HIGH\_DOSE\_MAC\_DN 163  
0.3808678 1.603564 0 0.004269626 0.955  
2792 "tags=39%, list=20%, signal=48%"  
GSE22886\_NAIVE\_TCELL\_VS\_NKCELL\_DN GSE22886\_NAIVE\_TCELL\_VS\_NKCELL\_DN  
131 0.390333 1.6034628 0 0.004271439  
0.955 1880 "tags=33%, list=13%, signal=38%"  
GSE33292\_DN3\_THYMOCYTE\_VS\_TCELL\_LYMPHOMA\_FROM\_TCF1\_KO\_DN  
GSE33292\_DN3\_THYMOCYTE\_VS\_TCELL\_LYMPHOMA\_FROM\_TCF1\_KO\_DN  
148 0.38594416 1.603093 0 0.004294045 0.955  
1525 "tags=21%, list=11%, signal=23%"  
GSE8685\_IL2\_STARVED\_VS\_IL15\_ACT\_IL2\_STARVED\_CD4\_TCELL\_DN  
GSE8685\_IL2\_STARVED\_VS\_IL15\_ACT\_IL2\_STARVED\_CD4\_TCELL\_DN  
140 0.38873756 1.6030415 0.002096436  
0.004290573 0.955 2492 "tags=38%, list=18%, signal=46%"  
GSE7400\_CTRL\_VS\_CSF3\_IN\_VIVO\_TREATED\_PBMC\_DN  
GSE7400\_CTRL\_VS\_CSF3\_IN\_VIVO\_TREATED\_PBMC\_DN 131  
0.39456117 1.6011939 0.002118644 0.004426486  
0.959 2239 "tags=31%, list=16%, signal=37%"  
GSE27786\_CD8\_TCELL\_VS\_NKCELL\_DN GSE27786\_CD8\_TCELL\_VS\_NKCELL\_DN  
146 0.38462892 1.6000823 0  
0.00449174 0.959 1285 "tags=21%, list=9%, signal=23%"  
GSE339\_EX\_VIVO\_VS\_IN\_CULTURE\_CD8POS\_DC\_UP  
GSE339\_EX\_VIVO\_VS\_IN\_CULTURE\_CD8POS\_DC\_UP 156  
0.38510028 1.5999358 0 0.004495896 0.959  
2195 "tags=34%, list=16%, signal=40%"  
GSE12392\_CD8A\_POS\_VS\_NEG\_SPLEEN\_IFNB\_KO\_DC\_UP  
GSE12392\_CD8A\_POS\_VS\_NEG\_SPLEEN\_IFNB\_KO\_DC\_UP 160  
0.3808445 1.5997697 0 0.004503829 0.959  
2726 "tags=39%, list=19%, signal=47%"  
GSE29618\_LAIV\_VS\_TIV\_FLU\_VACCINE\_DAY7\_MONOCYTE\_DN  
GSE29618\_LAIV\_VS\_TIV\_FLU\_VACCINE\_DAY7\_MONOCYTE\_DN 143  
0.39169702 1.5996859 0.002008032 0.004502777  
0.959 2071 "tags=28%, list=15%, signal=32%"  
GSE17721\_POLYIC\_VS\_CPG\_16H\_BMDC\_DN  
GSE17721\_POLYIC\_VS\_CPG\_16H\_BMDC\_DN 137  
0.3906073 1.5992836 0.002109705 0.004521107  
0.96 1953 "tags=28%, list=14%, signal=32%"  
GSE17721\_PAM3CSK4\_VS\_GADIQUIMOD\_24H\_BMDC\_DN  
GSE17721\_PAM3CSK4\_VS\_GADIQUIMOD\_24H\_BMDC\_DN 147  
0.385283 1.5986396 0.00209205 0.004563886 0.963  
2268 "tags=30%, list=16%, signal=35%"  
GSE17721\_0.5H\_VS\_8H\_LPS\_BMDC\_UP GSE17721\_0.5H\_VS\_8H\_LPS\_BMDC\_UP  
150 0.3853624 1.5986173 0  
0.00456016 0.963 2347 "tags=31%, list=17%, signal=37%"  
GSE24142\_DN2\_VS\_DN3\_THYMOCYTE\_ADULT\_UP  
GSE24142\_DN2\_VS\_DN3\_THYMOCYTE\_ADULT\_UP 157  
0.38121897 1.5983201 0.002314815 0.004579496  
0.964 2494 "tags=31%, list=18%, signal=37%"  
GSE22140\_HEALTHY\_VS\_ARTHRTIC\_GERMFREE\_MOUSE\_CD4\_TCELL\_UP  
GSE22140\_HEALTHY\_VS\_ARTHRTIC\_GERMFREE\_MOUSE\_CD4\_TCELL\_UP  
152 0.38465515 1.5969428 0 0.004666001  
0.965 1921 "tags=32%, list=14%, signal=36%"

|                                                           |                                  |                                  |                                  |             |             |
|-----------------------------------------------------------|----------------------------------|----------------------------------|----------------------------------|-------------|-------------|
| GSE12507_PDC_CELL_LINE_VS_IMMATUE_T_CELL_LINE_UP          |                                  |                                  |                                  |             |             |
| GSE12507_PDC_CELL_LINE_VS_IMMATUE_T_CELL_LINE_UP          |                                  |                                  |                                  |             | 118         |
| 0.39940605                                                | 1.5967777                        | 0.004273505                      |                                  |             | 0.004675003 |
| 0.965                                                     | 1424                             | "tags=25%, list=10%, signal=28%" |                                  |             |             |
| GSE13484_12H_UNSTIM_VS_YF17D_VACCINE_STIM_PBMC_UP         |                                  |                                  |                                  |             |             |
| GSE13484_12H_UNSTIM_VS_YF17D_VACCINE_STIM_PBMC_UP         |                                  |                                  |                                  |             | 134         |
| 0.39345315                                                | 1.5966138                        | 0                                | 0.004678856                      |             | 0.965       |
| 2416                                                      | "tags=41%, list=17%, signal=49%" |                                  |                                  |             |             |
| GSE25123_CTRL_VS_IL4_STIM_PPARG_KO_MACROPHAGE_UP          |                                  |                                  |                                  |             |             |
| GSE25123_CTRL_VS_IL4_STIM_PPARG_KO_MACROPHAGE_UP          |                                  |                                  |                                  |             | 156         |
| 0.38226065                                                | 1.5963068                        | 0                                | 0.004711011                      |             | 0.967       |
| 1546                                                      | "tags=19%, list=11%, signal=21%" |                                  |                                  |             |             |
| GSE46606_UNSTIM_VS_CD40L_IL2_IL5_DAY1_STIMULATED_BCELL_DN |                                  |                                  |                                  |             |             |
| GSE46606_UNSTIM_VS_CD40L_IL2_IL5_DAY1_STIMULATED_BCELL_DN |                                  |                                  |                                  |             |             |
| 133                                                       | 0.38900936                       | 1.596053                         | 0.002169197                      |             | 0.00473153  |
| 0.968                                                     | 1234                             | "tags=20%, list=9%, signal=22%"  |                                  |             |             |
| GSE22886_NAIVE_CD4_TCELL_VS_MEMORY_TCELL_DN               |                                  |                                  |                                  |             |             |
| GSE22886_NAIVE_CD4_TCELL_VS_MEMORY_TCELL_DN               |                                  |                                  |                                  |             | 147         |
| 0.38117412                                                | 1.5955465                        | 0                                | 0.004759602                      |             | 0.969       |
| 2099                                                      | "tags=34%, list=15%, signal=40%" |                                  |                                  |             |             |
| GSE39820_CTRL_VS_IL1B_IL6_IL23A_CD4_TCELL_UP              |                                  |                                  |                                  |             |             |
| GSE39820_CTRL_VS_IL1B_IL6_IL23A_CD4_TCELL_UP              |                                  |                                  |                                  |             | 148         |
| 0.38344482                                                | 1.5949152                        | 0                                | 0.004804542                      |             | 0.969       |
| 1797                                                      | "tags=30%, list=13%, signal=34%" |                                  |                                  |             |             |
| GSE41867_MEMORY_VS_EXHAUSTED_CD8_TCELL_DAY30_LCMV_DN      |                                  |                                  |                                  |             |             |
| GSE41867_MEMORY_VS_EXHAUSTED_CD8_TCELL_DAY30_LCMV_DN      |                                  |                                  |                                  |             |             |
| 136                                                       | 0.3852811                        | 1.5938218                        | 0.002136752                      |             |             |
| 0.004886044                                               | 0.971                            | 1907                             | "tags=29%, list=14%, signal=33%" |             |             |
| GSE17301_CTRL_VS_48H_IFNA2_STIM_CD8_TCELL_DN              |                                  |                                  |                                  |             |             |
| GSE17301_CTRL_VS_48H_IFNA2_STIM_CD8_TCELL_DN              |                                  |                                  |                                  |             | 144         |
| 0.3889694                                                 | 1.5936329                        | 0.002083333                      |                                  | 0.004895967 |             |
| 0.972                                                     | 1664                             | "tags=21%, list=12%, signal=23%" |                                  |             |             |
| GSE36826_WT_VS_IL1R_KO_SKIN_DN                            |                                  |                                  |                                  |             |             |
| GSE36826_WT_VS_IL1R_KO_SKIN_DN                            |                                  |                                  |                                  |             |             |
| 152                                                       | 0.3869395                        | 1.5935509                        | 0                                |             |             |
| 0.004894456                                               | 0.972                            | 2625                             | "tags=39%, list=19%, signal=47%" |             |             |
| GSE21360_PRIMARY_VS_SECONDARY_MEMORY_CD8_TCELL_UP         |                                  |                                  |                                  |             |             |
| GSE21360_PRIMARY_VS_SECONDARY_MEMORY_CD8_TCELL_UP         |                                  |                                  |                                  |             | 128         |
| 0.39472872                                                | 1.5934988                        | 0.002083333                      |                                  | 0.004900598 |             |
| 0.972                                                     | 2199                             | "tags=27%, list=16%, signal=32%" |                                  |             |             |
| GSE6674_UNSTIM_VS_ANTI_IGM_AND_CPG_STIM_BCELL_UP          |                                  |                                  |                                  |             |             |
| GSE6674_UNSTIM_VS_ANTI_IGM_AND_CPG_STIM_BCELL_UP          |                                  |                                  |                                  |             | 141         |
| 0.39088312                                                | 1.5932059                        | 0                                | 0.00490932                       |             | 0.973       |
| 1418                                                      | "tags=26%, list=10%, signal=29%" |                                  |                                  |             |             |
| GSE9988_ANTI_TREM1_AND_LPS_VS_CTRL_TREATED_MONOCYTES_DN   |                                  |                                  |                                  |             |             |
| GSE9988_ANTI_TREM1_AND_LPS_VS_CTRL_TREATED_MONOCYTES_DN   |                                  |                                  |                                  |             |             |
| 145                                                       | 0.38992128                       | 1.5931343                        | 0.002079002                      |             |             |
| 0.004907883                                               | 0.973                            | 2609                             | "tags=37%, list=18%, signal=44%" |             |             |
| GSE7764_IL15_NK_CELL_24H_VS_SPLENOCYTE_UP                 |                                  |                                  |                                  |             |             |
| GSE7764_IL15_NK_CELL_24H_VS_SPLENOCYTE_UP                 |                                  |                                  |                                  |             | 143         |
| 0.38620278                                                | 1.5921409                        | 0.004264392                      |                                  | 0.004987654 |             |
| 0.975                                                     | 2583                             | "tags=41%, list=18%, signal=50%" |                                  |             |             |
| GSE45739_NRAS_KO_VS_WT_UNSTIM_CD4_TCELL_UP                |                                  |                                  |                                  |             |             |
| GSE45739_NRAS_KO_VS_WT_UNSTIM_CD4_TCELL_UP                |                                  |                                  |                                  |             | 143         |
| 0.38299277                                                | 1.5914867                        | 0.002016129                      |                                  | 0.005034281 |             |

|                                                                  |                                  |                                  |                                  |             |
|------------------------------------------------------------------|----------------------------------|----------------------------------|----------------------------------|-------------|
| 0.977                                                            | 2389                             | "tags=31%, list=17%, signal=37%" |                                  |             |
| GSE43955_10H_VS_60H_ACT_CD4_TCELL_WITH_TGFB_IL6_UP               |                                  |                                  |                                  |             |
| GSE43955_10H_VS_60H_ACT_CD4_TCELL_WITH_TGFB_IL6_UP               |                                  |                                  |                                  |             |
| 0.37606284                                                       | 1.5907758                        | 0                                | 0.005079547                      | 0.977       |
| 2783                                                             | "tags=37%, list=20%, signal=46%" |                                  |                                  |             |
| GSE29164_DAY3_VS_DAY7_CD8_TCELL_TREATED_MELANOMA_DN              |                                  |                                  |                                  |             |
| GSE29164_DAY3_VS_DAY7_CD8_TCELL_TREATED_MELANOMA_DN              |                                  |                                  |                                  |             |
| 143                                                              | 0.38524735                       | 1.5906137                        | 0                                | 0.005085501 |
| 0.977                                                            | 2033                             | "tags=28%, list=14%, signal=32%" |                                  |             |
| GSE8685_IL2_ACT_IL2_STARVED_VS_IL15_ACT_IL2_STARVED_CD4_TCELL_DN |                                  |                                  |                                  |             |
| GSE8685_IL2_ACT_IL2_STARVED_VS_IL15_ACT_IL2_STARVED_CD4_TCELL_DN |                                  |                                  |                                  |             |
|                                                                  | 140                              | 0.3823031                        | 1.5901346                        | 0           |
| 0.005110466                                                      | 0.977                            | 2499                             | "tags=31%, list=18%, signal=38%" |             |
| KAECH_DAY15_EFF_VS_MEMORY_CD8_TCELL_UP                           |                                  |                                  |                                  |             |
| KAECH_DAY15_EFF_VS_MEMORY_CD8_TCELL_UP                           |                                  |                                  |                                  |             |
| 0.3838409                                                        | 1.5895411                        | 0                                | 0.005145267                      | 0.977       |
| 2053                                                             | "tags=34%, list=15%, signal=40%" |                                  |                                  |             |
| GSE36009_WT_VS_NLRP10_KO_DC_LPS_STIM_UP                          |                                  |                                  |                                  |             |
| GSE36009_WT_VS_NLRP10_KO_DC_LPS_STIM_UP                          |                                  |                                  |                                  |             |
| 0.38849485                                                       | 1.5892544                        | 0.00610998                       | 0.005152336                      |             |
| 0.977                                                            | 2630                             | "tags=40%, list=19%, signal=48%" |                                  |             |
| GSE17721_CTRL_VS_GARDIQUIMOD_4H_BMDC_UP                          |                                  |                                  |                                  |             |
| GSE17721_CTRL_VS_GARDIQUIMOD_4H_BMDC_UP                          |                                  |                                  |                                  |             |
| 0.3796222                                                        | 1.5890347                        | 0.002114165                      | 0.005161915                      |             |
| 0.978                                                            | 1870                             | "tags=28%, list=13%, signal=32%" |                                  |             |
| GSE1460_NAIVE_CD4_TCELL_ADULT_BLOOD_VS_THYMIC_STROMAL_CELL_DN    |                                  |                                  |                                  |             |
| GSE1460_NAIVE_CD4_TCELL_ADULT_BLOOD_VS_THYMIC_STROMAL_CELL_DN    |                                  |                                  |                                  |             |
|                                                                  | 147                              | 0.3839672                        | 1.5885272                        | 0.002145923 |
| 0.005186557                                                      | 0.979                            | 1101                             | "tags=16%, list=8%, signal=18%"  |             |
| GSE17721_POLYIC_VS_CPG_12H_BMDC_DN                               |                                  |                                  |                                  |             |
| GSE17721_POLYIC_VS_CPG_12H_BMDC_DN                               |                                  |                                  |                                  |             |
| 0.38114217                                                       | 1.5884601                        | 0.004081633                      | 0.005186027                      |             |
| 0.979                                                            | 2704                             | "tags=32%, list=19%, signal=39%" |                                  |             |
| GSE25123_CTRL_VS_ROSIGLITAZONE_STIM_MACROPHAGE_DN                |                                  |                                  |                                  |             |
| GSE25123_CTRL_VS_ROSIGLITAZONE_STIM_MACROPHAGE_DN                |                                  |                                  |                                  |             |
| 0.3907722                                                        | 1.5881926                        | 0.006302521                      | 0.005186847                      |             |
| 0.979                                                            | 2835                             | "tags=35%, list=20%, signal=44%" |                                  |             |
| GSE42021_CD24HI_VS_CD24INT_TREG_THYMUS_UP                        |                                  |                                  |                                  |             |
| GSE42021_CD24HI_VS_CD24INT_TREG_THYMUS_UP                        |                                  |                                  |                                  |             |
| 0.38327366                                                       | 1.5878483                        | 0                                | 0.0052063                        | 0.979       |
| 2642                                                             | "tags=38%, list=19%, signal=46%" |                                  |                                  |             |
| GSE19888_CTRL_VS_A3R_ACTIVATION_MAST_CELL_UP                     |                                  |                                  |                                  |             |
| GSE19888_CTRL_VS_A3R_ACTIVATION_MAST_CELL_UP                     |                                  |                                  |                                  |             |
| 0.389427                                                         | 1.5874484                        | 0                                | 0.005235951                      | 0.979       |
| 2487                                                             | "tags=34%, list=18%, signal=41%" |                                  |                                  |             |
| GSE411_UNSTIM_VS_100MIN_IL6_STIM_SOCS3_KO_MACROPHAGE_DN          |                                  |                                  |                                  |             |
| GSE411_UNSTIM_VS_100MIN_IL6_STIM_SOCS3_KO_MACROPHAGE_DN          |                                  |                                  |                                  |             |
| 150                                                              | 0.38052827                       | 1.5869014                        | 0                                | 0.005281528 |
| 0.98                                                             | 1608                             | "tags=27%, list=11%, signal=31%" |                                  |             |
| GSE30971_2H_VS_4H_LPS_STIM_MACROPHAGE_WBP7_HET_UP                |                                  |                                  |                                  |             |
| GSE30971_2H_VS_4H_LPS_STIM_MACROPHAGE_WBP7_HET_UP                |                                  |                                  |                                  |             |
| 0.40213192                                                       | 1.5853658                        | 0                                | 0.005399816                      | 0.981       |
| 2311                                                             | "tags=37%, list=16%, signal=43%" |                                  |                                  |             |
| GSE17721_CTRL_VS_LPS_1H_BMDC_UP                                  |                                  |                                  |                                  |             |
| GSE17721_CTRL_VS_LPS_1H_BMDC_UP                                  |                                  |                                  |                                  |             |

|                                                                    |                                  |                                  |                                  |             |
|--------------------------------------------------------------------|----------------------------------|----------------------------------|----------------------------------|-------------|
| 142                                                                | 0.38674363                       | 1.5849984                        | 0                                |             |
| 0.005420202                                                        | 0.981                            | 1556                             | "tags=24%, list=11%, signal=27%" |             |
| GSE29618_MONOCYTE_VS_MDC_DAY7_FLU_VACCINE_DN                       |                                  |                                  |                                  |             |
| GSE29618_MONOCYTE_VS_MDC_DAY7_FLU_VACCINE_DN                       |                                  |                                  |                                  | 126         |
| 0.38910568                                                         | 1.5848082                        | 0.002                            | 0.005431998                      | 0.981       |
| 1936                                                               | "tags=31%, list=14%, signal=36%" |                                  |                                  |             |
| GSE2770_TGFB_AND_IL4_VS_TGFB_AND_IL12_TREATED_ACT_CD4_TCELL_48H_DN |                                  |                                  |                                  |             |
| GSE2770_TGFB_AND_IL4_VS_TGFB_AND_IL12_TREATED_ACT_CD4_TCELL_48H_DN |                                  |                                  |                                  |             |
| 137                                                                | 0.38649428                       | 1.5840622                        | 0.004024145                      |             |
| 0.00548368                                                         | 0.981                            | 2060                             | "tags=31%, list=15%, signal=36%" |             |
| GSE14908_ATOPIC_VS_NONATOPIC_PATIENT_HDM_STIM_CD4_TCELL_UP         |                                  |                                  |                                  |             |
| GSE14908_ATOPIC_VS_NONATOPIC_PATIENT_HDM_STIM_CD4_TCELL_UP         |                                  |                                  |                                  |             |
| 146                                                                | 0.38182434                       | 1.5828446                        | 0                                | 0.005578857 |
| 0.983                                                              | 2468                             | "tags=37%, list=17%, signal=44%" |                                  |             |
| GSE19923_WT_VS_HEB_KO_DP_THYMOCYTE_DN                              |                                  |                                  |                                  |             |
| GSE19923_WT_VS_HEB_KO_DP_THYMOCYTE_DN                              |                                  |                                  |                                  | 169         |
| 0.37783706                                                         | 1.5823272                        | 0                                | 0.005610202                      | 0.983       |
| 2779                                                               | "tags=38%, list=20%, signal=47%" |                                  |                                  |             |
| GSE1460_NAIVE_CD4_TCELL_CORD_BLOOD_VS_THYMIC_STROMAL_CELL_DN       |                                  |                                  |                                  |             |
| GSE1460_NAIVE_CD4_TCELL_CORD_BLOOD_VS_THYMIC_STROMAL_CELL_DN       |                                  |                                  |                                  |             |
| 143                                                                | 0.38451198                       | 1.5818074                        | 0                                |             |
| 0.00563914                                                         | 0.983                            | 931                              | "tags=20%, list=7%, signal=21%"  |             |
| GSE17301_CTRL_VS_48H_ACD3_ACD28_IFNA5_STIM_CD8_TCELL_UP            |                                  |                                  |                                  |             |
| GSE17301_CTRL_VS_48H_ACD3_ACD28_IFNA5_STIM_CD8_TCELL_UP            |                                  |                                  |                                  |             |
| 147                                                                | 0.37964272                       | 1.5812371                        | 0.004048583                      |             |
| 0.005671784                                                        | 0.984                            | 2102                             | "tags=31%, list=15%, signal=36%" |             |
| GSE1791_CTRL_VS_NEUROMEDINU_IN_T_CELL_LINE_12H_DN                  |                                  |                                  |                                  |             |
| GSE1791_CTRL_VS_NEUROMEDINU_IN_T_CELL_LINE_12H_DN                  |                                  |                                  |                                  | 97          |
| 0.40616202                                                         | 1.5797745                        | 0.006302521                      | 0.005771175                      |             |
| 0.988                                                              | 1265                             | "tags=19%, list=9%, signal=20%"  |                                  |             |
| GSE11973_MIR223_KOVS_WT_BONE_MARROW_NEUTROPHIL_UP                  |                                  |                                  |                                  |             |
| GSE11973_MIR223_KOVS_WT_BONE_MARROW_NEUTROPHIL_UP                  |                                  |                                  |                                  | 163         |
| 0.37336558                                                         | 1.5793257                        | 0                                | 0.005806068                      | 0.989       |
| 2272                                                               | "tags=39%, list=16%, signal=46%" |                                  |                                  |             |
| GSE21033_CTRL_VS_POLYIC_STIM_DC_3H_DN                              |                                  |                                  |                                  |             |
| GSE21033_CTRL_VS_POLYIC_STIM_DC_3H_DN                              |                                  |                                  |                                  | 137         |
| 0.38614276                                                         | 1.5783644                        | 0.002123142                      | 0.005890215                      |             |
| 0.99                                                               | 2213                             | "tags=35%, list=16%, signal=41%" |                                  |             |
| GSE37416_CTRL_VS_48H_F_TULARENSIS_LVS_NEUTROPHIL_DN                |                                  |                                  |                                  |             |
| GSE37416_CTRL_VS_48H_F_TULARENSIS_LVS_NEUTROPHIL_DN                |                                  |                                  |                                  |             |
| 140                                                                | 0.38511878                       | 1.5781811                        | 0.002237137                      |             |
| 0.005898831                                                        | 0.991                            | 2519                             | "tags=33%, list=18%, signal=40%" |             |
| GSE6092_CTRL_VS_BORRELIA_BIRGDOFERI_INF_ENDOTHELIAL_CELL_UP        |                                  |                                  |                                  |             |
| GSE6092_CTRL_VS_BORRELIA_BIRGDOFERI_INF_ENDOTHELIAL_CELL_UP        |                                  |                                  |                                  |             |
| 125                                                                | 0.38693178                       | 1.5780327                        | 0.002188184                      |             |
| 0.005906199                                                        | 0.991                            | 2389                             | "tags=38%, list=17%, signal=46%" |             |
| GSE43955_1H_VS_20H_ACT_CD4_TCELL_WITH_TGFB_IL6_UP                  |                                  |                                  |                                  |             |
| GSE43955_1H_VS_20H_ACT_CD4_TCELL_WITH_TGFB_IL6_UP                  |                                  |                                  |                                  | 162         |
| 0.3757371                                                          | 1.5777214                        | 0                                | 0.005930858                      | 0.992       |
| 2384                                                               | "tags=33%, list=17%, signal=39%" |                                  |                                  |             |
| GSE2770_UNTREATED_VS_ACT_CD4_TCELL_2H_DN                           |                                  |                                  |                                  |             |
| GSE2770_UNTREATED_VS_ACT_CD4_TCELL_2H_DN                           |                                  |                                  |                                  | 139         |
| 0.38897678                                                         | 1.5773599                        | 0                                | 0.005946823                      | 0.992       |
| 1973                                                               | "tags=29%, list=14%, signal=33%" |                                  |                                  |             |

GSE9988\_ANTI\_TREM1\_VS\_VEHICLE\_TREATED\_MONOCYTES\_DN  
GSE9988\_ANTI\_TREM1\_VS\_VEHICLE\_TREATED\_MONOCYTES\_DN 153  
0.37940896 1.5773253 0 0.005941814 0.992  
2620 "tags=37%, list=19%, signal=45%"  
GSE36078\_WT\_VS\_IL1R\_KO\_LUNG\_DC\_DN GSE36078\_WT\_VS\_IL1R\_KO\_LUNG\_DC\_DN  
153 0.37930226 1.5765328 0.001930502  
0.005994745 0.993 2350 "tags=42%, list=17%, signal=50%"  
GSE40274\_CTRL\_VS\_FOXP3\_AND\_SATB1\_TRANSDUCED\_ACTIVATED\_CD4\_TCELL\_UP  
GSE40274\_CTRL\_VS\_FOXP3\_AND\_SATB1\_TRANSDUCED\_ACTIVATED\_CD4\_TCELL\_UP  
126 0.39283505 1.5759503 0.004464286  
0.006038946 0.993 2418 "tags=37%, list=17%, signal=45%"  
GSE21379\_TFH\_VS\_NON\_TFH\_SAP\_KO\_CD4\_TCELL\_UP  
GSE21379\_TFH\_VS\_NON\_TFH\_SAP\_KO\_CD4\_TCELL\_UP 143  
0.37983334 1.5750705 0.002053388 0.006108584  
0.993 2474 "tags=32%, list=18%, signal=39%"  
GSE45365\_WT\_VS\_IFNAR\_KO\_BCELL\_UP GSE45365\_WT\_VS\_IFNAR\_KO\_BCELL\_UP  
122 0.39029208 1.5745846 0.006263048  
0.006140214 0.993 1544 "tags=23%, list=11%, signal=26%"  
GSE41867\_DAY6\_VS\_DAY8\_LCMV\_ARMSTRONG\_EFFECTOR\_CD8\_TCELL\_UP  
GSE41867\_DAY6\_VS\_DAY8\_LCMV\_ARMSTRONG\_EFFECTOR\_CD8\_TCELL\_UP  
158 0.37927407 1.5743902 0 0.006149754  
0.993 2862 "tags=41%, list=20%, signal=51%"  
GSE3982\_NEUTROPHIL\_VS\_NKCELL\_DN GSE3982\_NEUTROPHIL\_VS\_NKCELL\_DN  
143 0.37975395 1.5734797 0.002164502  
0.006209578 0.993 1622 "tags=27%, list=11%, signal=31%"  
GSE27092\_WT\_VS\_HDAC7\_PHOSPHO\_DEFICIENT\_CD8\_TCELL\_DN  
GSE27092\_WT\_VS\_HDAC7\_PHOSPHO\_DEFICIENT\_CD8\_TCELL\_DN  
161 0.38044155 1.5731794 0 0.006229879  
0.993 2012 "tags=27%, list=14%, signal=31%"  
GSE15930\_STIM\_VS\_STIM\_AND\_IFNAB\_72H\_CD8\_T\_CELL\_DN  
GSE15930\_STIM\_VS\_STIM\_AND\_IFNAB\_72H\_CD8\_T\_CELL\_DN 162  
0.3745099 1.5718237 0 0.006346912 0.993  
1819 "tags=28%, list=13%, signal=32%"  
GSE2706\_2H\_VS\_8H\_R848\_AND\_LPS\_STIM\_DC\_UP  
GSE2706\_2H\_VS\_8H\_R848\_AND\_LPS\_STIM\_DC\_UP 147  
0.38364092 1.5717628 0.004201681 0.006346325  
0.993 1858 "tags=33%, list=13%, signal=37%"  
GSE17580\_UNINFECTED\_VS\_S\_MANSONI\_INF\_TEFF\_DN  
GSE17580\_UNINFECTED\_VS\_S\_MANSONI\_INF\_TEFF\_DN 152  
0.37687066 1.5717559 0.002040816 0.006339734  
0.993 1621 "tags=26%, list=11%, signal=29%"  
GSE17721\_0.5H\_VS\_12H\_GARDIQUIMOD\_BMDC\_UP  
GSE17721\_0.5H\_VS\_12H\_GARDIQUIMOD\_BMDC\_UP 144  
0.37859666 1.5710974 0.004115226 0.006384241  
0.993 2511 "tags=38%, list=18%, signal=45%"  
GSE9988\_LPS\_VS\_CTRL\_TREATED\_MONOCYTE\_DN  
GSE9988\_LPS\_VS\_CTRL\_TREATED\_MONOCYTE\_DN 143  
0.37834626 1.568886 0.00209205 0.006553038 0.993  
1916 "tags=27%, list=14%, signal=30%"  
GSE10856\_CTRL\_VS\_TNFRSF6B\_IN\_MACROPHAGE\_DN  
GSE10856\_CTRL\_VS\_TNFRSF6B\_IN\_MACROPHAGE\_DN 123  
0.3848313 1.5686076 0.006550218 0.006574097  
0.993 2486 "tags=33%, list=18%, signal=39%"  
GSE3565\_CTRL\_VS\_LPS\_INJECTED\_SPLENOCYTES\_UP

|                                                                   |                                  |                                  |                                  |             |
|-------------------------------------------------------------------|----------------------------------|----------------------------------|----------------------------------|-------------|
| GSE3565_CTRL_VS_LPS_INJECTED_SPLENOCYTES_UP                       |                                  |                                  |                                  | 148         |
| 0.3768584                                                         | 1.5669492                        | 0                                | 0.006741728                      | 0.993       |
| 2274                                                              | "tags=43%, list=16%, signal=50%" |                                  |                                  |             |
| GSE22935_WT_VS_MYD88_KO_MACROPHAGE_UP                             |                                  |                                  |                                  |             |
| GSE22935_WT_VS_MYD88_KO_MACROPHAGE_UP                             |                                  |                                  | 169                              |             |
| 0.37043935                                                        | 1.5663316                        | 0                                | 0.006784463                      | 0.993       |
| 1712                                                              | "tags=25%, list=12%, signal=29%" |                                  |                                  |             |
| GSE15930_STIM_VS_STIM_AND_TRICHOSTATINA_48H_CD8_T_CELL_UP         |                                  |                                  |                                  |             |
| GSE15930_STIM_VS_STIM_AND_TRICHOSTATINA_48H_CD8_T_CELL_UP         |                                  |                                  |                                  |             |
| 154                                                               | 0.3749493                        | 1.5658001                        | 0.00209205                       |             |
| 0.006830721                                                       | 0.993                            | 2204                             | "tags=36%, list=16%, signal=43%" |             |
| GSE17721_0.5H_VS_8H_POLYIC_BMDC_UP                                |                                  |                                  |                                  |             |
| GSE17721_0.5H_VS_8H_POLYIC_BMDC_UP                                |                                  |                                  | 161                              |             |
| 0.37683246                                                        | 1.5655977                        | 0                                | 0.00683943                       | 0.993       |
| 1798                                                              | "tags=26%, list=13%, signal=30%" |                                  |                                  |             |
| GSE3982_NEUTROPHIL_VS_CENT_MEMORY_CD4_TCELL_DN                    |                                  |                                  |                                  |             |
| GSE3982_NEUTROPHIL_VS_CENT_MEMORY_CD4_TCELL_DN                    |                                  |                                  |                                  | 128         |
| 0.3835098                                                         | 1.5639539                        | 0                                | 0.006972677                      | 0.993       |
| 1978                                                              | "tags=31%, list=14%, signal=36%" |                                  |                                  |             |
| GSE13485_CTRL_VS_DAY1_YF17D_VACCINE_PBMC_UP                       |                                  |                                  |                                  |             |
| GSE13485_CTRL_VS_DAY1_YF17D_VACCINE_PBMC_UP                       |                                  |                                  |                                  | 130         |
| 0.38039348                                                        | 1.5635759                        | 0.004132231                      | 0.006995781                      |             |
| 0.993                                                             | 2173                             | "tags=33%, list=15%, signal=39%" |                                  |             |
| GSE17721_CPG_VS_GARDIQUIMOD_8H_BMDC_UP                            |                                  |                                  |                                  |             |
| GSE17721_CPG_VS_GARDIQUIMOD_8H_BMDC_UP                            |                                  |                                  | 154                              |             |
| 0.37813148                                                        | 1.5630114                        | 0.00204918                       | 0.007029606                      |             |
| 0.993                                                             | 1724                             | "tags=25%, list=12%, signal=28%" |                                  |             |
| GSE5589_LPS_VS_LPS_AND_IL10_STIM_IL10_KO_MACROPHAGE_45MIN_DN      |                                  |                                  |                                  |             |
| GSE5589_LPS_VS_LPS_AND_IL10_STIM_IL10_KO_MACROPHAGE_45MIN_DN      |                                  |                                  |                                  |             |
| 143                                                               | 0.3789538                        | 1.5621743                        | 0.004494382                      |             |
| 0.007099373                                                       | 0.993                            | 2350                             | "tags=32%, list=17%, signal=38%" |             |
| GSE29164_UNTREATED_VS_CD8_TCELL_AND_IL12_TREATED_MELANOMA_DAY7_UP |                                  |                                  |                                  |             |
| GSE29164_UNTREATED_VS_CD8_TCELL_AND_IL12_TREATED_MELANOMA_DAY7_UP |                                  |                                  |                                  |             |
| 137                                                               | 0.3804969                        | 1.5617772                        | 0                                |             |
| 0.007126852                                                       | 0.995                            | 2391                             | "tags=34%, list=17%, signal=40%" |             |
| GSE18791_CTRL_VS_NEWCASTLE_VIRUS_DC_14H_UP                        |                                  |                                  |                                  |             |
| GSE18791_CTRL_VS_NEWCASTLE_VIRUS_DC_14H_UP                        |                                  |                                  | 147                              |             |
| 0.37490973                                                        | 1.5614542                        | 0.002105263                      | 0.007155654                      |             |
| 0.995                                                             | 2695                             | "tags=40%, list=19%, signal=49%" |                                  |             |
| GSE23308_WT_VS_MINERALCORTICOID_REC_KO_MACROPHAGE_UP              |                                  |                                  |                                  |             |
| GSE23308_WT_VS_MINERALCORTICOID_REC_KO_MACROPHAGE_UP              |                                  |                                  |                                  |             |
| 139                                                               | 0.3735309                        | 1.5613453                        | 0.002053388                      |             |
| 0.007157912                                                       | 0.995                            | 1816                             | "tags=25%, list=13%, signal=29%" |             |
| GSE28726_NAIVE_CD4_TCELL_VS_NAIVE_NKTCELL_UP                      |                                  |                                  |                                  |             |
| GSE28726_NAIVE_CD4_TCELL_VS_NAIVE_NKTCELL_UP                      |                                  |                                  |                                  | 148         |
| 0.37773594                                                        | 1.5603840                        | 0.007244274                      | 0.995                            |             |
| 2490                                                              | "tags=43%, list=18%, signal=52%" |                                  |                                  |             |
| GSE14308_TH1_VS_NATURAL_TREG_UP                                   |                                  |                                  |                                  |             |
| GSE14308_TH1_VS_NATURAL_TREG_UP                                   |                                  |                                  |                                  |             |
| 148                                                               | 0.37856612                       | 1.5599284                        | 0.004376368                      |             |
| 0.007280101                                                       | 0.995                            | 2632                             | "tags=39%, list=19%, signal=48%" |             |
| GSE15930_STIM_VS_STIM_AND_TRICHOSTATINA_24H_CD8_T_CELL_DN         |                                  |                                  |                                  |             |
| GSE15930_STIM_VS_STIM_AND_TRICHOSTATINA_24H_CD8_T_CELL_DN         |                                  |                                  |                                  |             |
| 151                                                               | 0.37342262                       | 1.5599151                        | 0                                | 0.007272671 |
| 0.995                                                             | 2267                             | "tags=33%, list=16%, signal=39%" |                                  |             |

GSE360\_HIGH\_VS\_LOW\_DOSE\_B\_MALAYI\_MAC\_UP  
GSE360\_HIGH\_VS\_LOW\_DOSE\_B\_MALAYI\_MAC\_UP 140  
0.37524796 1.5598589 0.002227172 0.007274865  
0.995 1984 "tags=30%, list=14%, signal=35%"  
GSE5542\_UNTREATED\_VS\_IFNA\_TREATED\_EPITHELIAL\_CELLS\_6H\_UP  
GSE5542\_UNTREATED\_VS\_IFNA\_TREATED\_EPITHELIAL\_CELLS\_6H\_UP  
141 0.37912384 1.5590767 0.004264392  
0.007347642 0.995 1738 "tags=27%, list=12%, signal=30%"  
GSE360\_L\_DONOVANI\_VS\_L\_MAJOR\_MAC\_UP  
GSE360\_L\_DONOVANI\_VS\_L\_MAJOR\_MAC\_UP 148  
0.3789573 1.5590358 0.00409836 0.007341375  
0.995 2672 "tags=34%, list=19%, signal=42%"  
GSE360\_L\_DONOVANI\_VS\_B\_MALAYI\_LOW\_DOSE\_MAC\_DN  
GSE360\_L\_DONOVANI\_VS\_B\_MALAYI\_LOW\_DOSE\_MAC\_DN 150  
0.36967456 1.5587559 0.002057613 0.00736124  
0.995 1798 "tags=27%, list=13%, signal=31%"  
GSE360\_T\_GONDII\_VS\_B\_MALAYI\_HIGH\_DOSE\_MAC\_DN  
GSE360\_T\_GONDII\_VS\_B\_MALAYI\_HIGH\_DOSE\_MAC\_DN 157  
0.3689763 1.5581068 0 0.00741452 0.995  
2517 "tags=32%, list=18%, signal=38%"  
GSE3982\_EOSINOPHIL\_VS\_NKCELL\_DN GSE3982\_EOSINOPHIL\_VS\_NKCELL\_DN  
141 0.38176426 1.5577323 0.004140787  
0.007453491 0.995 1870 "tags=24%, list=13%, signal=28%"  
GSE37416\_0H\_VS\_6H\_F\_TULARENSIS\_LVS\_NEUTROPHIL\_UP  
GSE37416\_0H\_VS\_6H\_F\_TULARENSIS\_LVS\_NEUTROPHIL\_UP 138  
0.37907043 1.5575377 0 0.007463802 0.996  
2223 "tags=30%, list=16%, signal=35%"  
GSE360\_L\_DONOVANI\_VS\_B\_MALAYI\_HIGH\_DOSE\_DC\_DN  
GSE360\_L\_DONOVANI\_VS\_B\_MALAYI\_HIGH\_DOSE\_DC\_DN 148  
0.37574542 1.5554687 0.002079002 0.0076559  
0.996 2389 "tags=32%, list=17%, signal=38%"  
GSE411\_UNSTIM\_VS\_100MIN\_IL6\_STIM\_MACROPHAGE\_UP  
GSE411\_UNSTIM\_VS\_100MIN\_IL6\_STIM\_MACROPHAGE\_UP 140  
0.3742847 1.554416 0 0.007759846 0.998  
2157 "tags=34%, list=15%, signal=39%"  
GSE43955\_10H\_VS\_60H\_ACT\_CD4\_TCELL\_UP  
GSE43955\_10H\_VS\_60H\_ACT\_CD4\_TCELL\_UP 161  
0.37436202 1.5539938 0.003944773 0.007793457  
0.998 2131 "tags=29%, list=15%, signal=34%"  
GSE17721\_0.5H\_VS\_8H\_CPG\_BMDC\_UP GSE17721\_0.5H\_VS\_8H\_CPG\_BMDC\_UP  
158 0.3726927 1.5532751 0.001996008  
0.007862594 0.998 2209 "tags=32%, list=16%, signal=38%"  
GSE13411\_NAIVE\_VS\_SWITCHED\_MEMORY\_BCELL\_DN  
GSE13411\_NAIVE\_VS\_SWITCHED\_MEMORY\_BCELL\_DN 141  
0.37606376 1.5530369 0.002173913 0.007874813  
0.998 2089 "tags=30%, list=15%, signal=35%"  
GSE16385\_MONOCYTE\_VS\_12H\_ROSIGLITAZONE\_IL4\_TREATED\_MACROPHAGE\_DN  
GSE16385\_MONOCYTE\_VS\_12H\_ROSIGLITAZONE\_IL4\_TREATED\_MACROPHAGE\_DN  
149 0.37263688 1.5530071 0.002141328  
0.007869279 0.998 2082 "tags=34%, list=15%, signal=39%"  
GSE27786\_LIN\_NEG\_VS\_ERYTHROBLAST\_DN  
GSE27786\_LIN\_NEG\_VS\_ERYTHROBLAST\_DN 138  
0.3800726 1.5527018 0.00845666 0.007892117  
0.998 1084 "tags=12%, list=8%, signal=13%"



GSE25123\_ROSIGLITAZONE\_VS\_IL4\_AND\_ROSIGLITAZONE\_STIM\_MACROPHAGE\_DAY1  
0\_UP  
GSE25123\_ROSIGLITAZONE\_VS\_IL4\_AND\_ROSIGLITAZONE\_STIM\_MACROPHAGE\_DAY1  
0\_UP 148 0.37477902 1.5522867  
0.002109705 0.007928835 0.998 2390 "tags=36%,  
list=17%, signal=43%"  
GSE3982\_NEUTROPHIL\_VS\_CENT\_MEMORY\_CD4\_TCELL\_UP  
GSE3982\_NEUTROPHIL\_VS\_CENT\_MEMORY\_CD4\_TCELL\_UP 147  
0.3798275 1.5521216 0.001992032 0.00794204  
0.998 1840 "tags=29%, list=13%, signal=33%"  
GSE3982\_CTRL\_VS\_IGE\_STIM\_MAST\_CELL\_DN  
GSE3982\_CTRL\_VS\_IGE\_STIM\_MAST\_CELL\_DN 136  
0.37961325 1.5520834 0 0.007940001 0.998  
1290 "tags=21%, list=9%, signal=22%"  
GSE42021\_TREG\_PLN\_VS\_CD24HI\_TREG\_THYMUS\_DN  
GSE42021\_TREG\_PLN\_VS\_CD24HI\_TREG\_THYMUS\_DN 159  
0.3752082 1.5520757 0.006423983 0.007932045  
0.998 2792 "tags=43%, list=20%, signal=53%"  
GSE42021\_TCONV\_PLN\_VS\_CD24INT\_TCONV\_THYMUS\_DN  
GSE42021\_TCONV\_PLN\_VS\_CD24INT\_TCONV\_THYMUS\_DN 159  
0.36964738 1.5519804 0.002118644 0.007935791  
0.998 1715 "tags=23%, list=12%, signal=26%"  
GSE20366\_EX\_VIVO\_VS\_DEC205\_CONVERSION\_NAIVE\_CD4\_TCELL\_UP  
GSE20366\_EX\_VIVO\_VS\_DEC205\_CONVERSION\_NAIVE\_CD4\_TCELL\_UP  
148 0.37309518 1.5519408 0.0041841  
0.007931364 0.998 1011 "tags=20%, list=7%, signal=22%"  
GSE24814\_STAT5\_KO\_VS\_WT\_PRE\_BCELL\_DN  
GSE24814\_STAT5\_KO\_VS\_WT\_PRE\_BCELL\_DN 153  
0.36801586 1.5518837 0.002212389 0.007930446  
0.998 1753 "tags=27%, list=12%, signal=30%"  
GSE20500\_CTRL\_VS\_RARA\_ANTAGONIST\_TREATED\_CD4\_TCELL\_UP  
GSE20500\_CTRL\_VS\_RARA\_ANTAGONIST\_TREATED\_CD4\_TCELL\_UP  
145 0.3766786 1.5518379 0.002145923  
0.007926029 0.998 2660 "tags=32%, list=19%, signal=39%"  
GSE8621\_LPS\_PRIMED\_UNSTIM\_VS\_LPS\_PRIMED\_AND\_LPS\_STIM\_MACROPHAGE\_DN  
GSE8621\_LPS\_PRIMED\_UNSTIM\_VS\_LPS\_PRIMED\_AND\_LPS\_STIM\_MACROPHAGE\_DN  
141 0.37880388 1.5508274 0.004  
0.008019932 0.998 2407 "tags=33%, list=17%, signal=39%"  
GSE17721\_LPS\_VS\_POLYIC\_6H\_BMDC\_DN GSE17721\_LPS\_VS\_POLYIC\_6H\_BMDC\_DN  
148 0.37539217 1.5502843 0.004255319  
0.008092624 0.998 2100 "tags=30%, list=15%, signal=35%"  
GSE37301\_MULTIPOTENT\_PROGENITOR\_VS\_CD4\_TCELL\_DN  
GSE37301\_MULTIPOTENT\_PROGENITOR\_VS\_CD4\_TCELL\_DN 144  
0.3729083 1.5501258 0 0.008097325 0.998  
1905 "tags=30%, list=13%, signal=34%"  
GSE8621\_UNSTIM\_VS\_LPS\_PRIMED\_UNSTIM\_MACROPHAGE\_DN  
GSE8621\_UNSTIM\_VS\_LPS\_PRIMED\_UNSTIM\_MACROPHAGE\_DN 136  
0.3798228 1.549745 0.00210084 0.008134862 0.998  
1919 "tags=30%, list=14%, signal=35%"  
GSE5589\_UNSTIM\_VS\_180MIN\_LPS\_AND\_IL10\_STIM\_MACROPHAGE\_DN  
GSE5589\_UNSTIM\_VS\_180MIN\_LPS\_AND\_IL10\_STIM\_MACROPHAGE\_DN  
143 0.37601638 1.5495478 0.008948546  
0.008152536 0.998 2947 "tags=42%, list=21%, signal=52%"  
GSE17721\_POLYIC\_VS\_PAM3CSK4\_4H\_BMDC\_DN

|                                                              |                                   |
|--------------------------------------------------------------|-----------------------------------|
| GSE17721_POLYIC_VS_PAM3CSK4_4H_BMDC_DN                       | 143                               |
| 0.3784309                                                    | 1.5486141 0.006355932 0.008256048 |
| 0.998 2277                                                   | "tags=33%, list=16%, signal=39%"  |
| GSE17186_BLOOD_VS_CORD_BLOOD_CD21LOW_TRANSITIONAL_BCELL_DN   |                                   |
| GSE17186_BLOOD_VS_CORD_BLOOD_CD21LOW_TRANSITIONAL_BCELL_DN   |                                   |
| 157 0.37286922                                               | 1.5482264 0 0.008280407           |
| 0.998 2215                                                   | "tags=30%, list=16%, signal=35%"  |
| GSE21670_UNTREATED_VS_TGFB_IL6_TREATED_STAT3_KO_CD4_TCELL_DN |                                   |
| GSE21670_UNTREATED_VS_TGFB_IL6_TREATED_STAT3_KO_CD4_TCELL_DN |                                   |
| 142 0.37130615                                               | 1.5477564 0.002028398             |
| 0.008336156 0.998 2374                                       | "tags=42%, list=17%, signal=49%"  |
| GSE6092_UNSTIM_VS_IFNG_STIM_ENDOTHELIAL_CELL_DN              |                                   |
| GSE6092_UNSTIM_VS_IFNG_STIM_ENDOTHELIAL_CELL_DN              | 142                               |
| 0.3718413 1.547162 0                                         | 0.008404573 0.999                 |
| 2132                                                         | "tags=37%, list=15%, signal=43%"  |
| GSE44732_UNSTIM_VS_IL27_STIM_IMATURE_DC_UP                   |                                   |
| GSE44732_UNSTIM_VS_IL27_STIM_IMATURE_DC_UP                   | 142                               |
| 0.37091085 1.5450885                                         | 0 0.008610868 1                   |
| 1983                                                         | "tags=29%, list=14%, signal=33%"  |
| GSE23568_ID3_TRANSDUCE_VS_ID3_KO_CD8_TCELL_UP                |                                   |
| GSE23568_ID3_TRANSDUCE_VS_ID3_KO_CD8_TCELL_UP                | 156                               |
| 0.3732626 1.5450217                                          | 0.003968254 0.008605845           |
| 1 1991                                                       | "tags=37%, list=14%, signal=43%"  |
| GSE26030_UNSTIM_VS_RESTIM_TH17_DAY15_POST_POLARIZATION_DN    |                                   |
| GSE26030_UNSTIM_VS_RESTIM_TH17_DAY15_POST_POLARIZATION_DN    |                                   |
| 147 0.3777152                                                | 1.5442342 0.00617284              |
| 0.008675061 1 2176                                           | "tags=30%, list=15%, signal=35%"  |
| GSE40274_CTRL_VS_IRF4_TRANSDUCE_ACTIVATED_CD4_TCELL_UP       |                                   |
| GSE40274_CTRL_VS_IRF4_TRANSDUCE_ACTIVATED_CD4_TCELL_UP       |                                   |
| 128 0.3808835                                                | 1.5411342 0.002028398             |
| 0.009025077 1 2148                                           | "tags=30%, list=15%, signal=36%"  |
| GSE17186_NAIVE_VS_CD21LOW_TRANSITIONAL_BCELL_UP              |                                   |
| GSE17186_NAIVE_VS_CD21LOW_TRANSITIONAL_BCELL_UP              | 154                               |
| 0.36875102 1.5406781                                         | 0.002155172 0.009062348           |
| 1 2046                                                       | "tags=34%, list=14%, signal=39%"  |
| GSE6269_E_COLI_VS_STREP_PNEUMO_INF_PBMC_DN                   |                                   |
| GSE6269_E_COLI_VS_STREP_PNEUMO_INF_PBMC_DN                   | 120                               |
| 0.38358757 1.5402412                                         | 0.002096436 0.009102103           |
| 1 1530                                                       | "tags=27%, list=11%, signal=30%"  |
| GSE45365_HEALTHY_VS_MCMV_INFECTION_CD8A_DC_UP                |                                   |
| GSE45365_HEALTHY_VS_MCMV_INFECTION_CD8A_DC_UP                | 146                               |
| 0.37278587 1.5400091                                         | 0.002169197 0.009117327           |
| 1 1921                                                       | "tags=28%, list=14%, signal=32%"  |
| GSE24574_BCL6_HIGH_TFH_VS_NAIVE_CD4_TCELL_DN                 |                                   |
| GSE24574_BCL6_HIGH_TFH_VS_NAIVE_CD4_TCELL_DN                 | 153                               |
| 0.36675882 1.5399213                                         | 0 0.00912096 1                    |
| 2598                                                         | "tags=46%, list=18%, signal=56%"  |
| GSE32986_UNSTIM_VS_CURDLAN_LOWDOSE_STIM_DC_UP                |                                   |
| GSE32986_UNSTIM_VS_CURDLAN_LOWDOSE_STIM_DC_UP                | 153                               |
| 0.36561763 1.5397973                                         | 0.00212766 0.009120126            |
| 1 2706                                                       | "tags=37%, list=19%, signal=46%"  |
| GSE17721_POLYIC_VS_GARDIQUIMOD_24H_BMDC_DN                   |                                   |
| GSE17721_POLYIC_VS_GARDIQUIMOD_24H_BMDC_DN                   | 152                               |
| 0.36812282 1.5396802                                         | 0.003960396 0.009126199           |

|                                                                     |                                  |                                  |                                  |             |
|---------------------------------------------------------------------|----------------------------------|----------------------------------|----------------------------------|-------------|
| 1                                                                   | 2057                             | "tags=32%, list=15%, signal=37%" |                                  |             |
| GSE17721_LPS_VS_GARDIQUIMOD_16H_BMDC_DN                             |                                  |                                  |                                  |             |
| GSE17721_LPS_VS_GARDIQUIMOD_16H_BMDC_DN 152                         |                                  |                                  |                                  |             |
| 0.37192938                                                          | 1.5396099                        | 0                                | 0.009126428                      | 1           |
| 2383                                                                | "tags=32%, list=17%, signal=38%" |                                  |                                  |             |
| GSE369_PRE_VS_POST_IL6_INJECTION_SOCS3_KO_LIVER_DN                  |                                  |                                  |                                  |             |
| GSE369_PRE_VS_POST_IL6_INJECTION_SOCS3_KO_LIVER_DN 158              |                                  |                                  |                                  |             |
| 0.36601362                                                          | 1.5395738                        | 0.002061856                      | 0.009121003                      |             |
| 1                                                                   | 2506                             | "tags=39%, list=18%, signal=47%" |                                  |             |
| GSE16522_ANTI_CD3CD28_STIM_VS_UNSTIM_MEMORY_CD8_TCELL_DN            |                                  |                                  |                                  |             |
| GSE16522_ANTI_CD3CD28_STIM_VS_UNSTIM_MEMORY_CD8_TCELL_DN            |                                  |                                  |                                  |             |
| 139                                                                 | 0.37023184                       | 1.5395465                        | 0.010799136                      |             |
| 0.009113243                                                         | 1                                | 2059                             | "tags=35%, list=15%, signal=40%" |             |
| GSE34515_CD16_NEG_VS_POS_MONOCYTE_UP                                |                                  |                                  |                                  |             |
| GSE34515_CD16_NEG_VS_POS_MONOCYTE_UP 145                            |                                  |                                  |                                  |             |
| 0.37409547                                                          | 1.5393674                        | 0                                | 0.009120512                      | 1           |
| 1995                                                                | "tags=27%, list=14%, signal=31%" |                                  |                                  |             |
| GSE35685_CD34POS_CD10NEG_CD62LP0S_VS_CD34POS_CD10POS_BONE_MARROW_UP |                                  |                                  |                                  |             |
| GSE35685_CD34POS_CD10NEG_CD62LP0S_VS_CD34POS_CD10POS_BONE_MARROW_UP |                                  |                                  |                                  |             |
|                                                                     | 162                              | 0.36905855                       | 1.5390228                        | 0           |
| 0.009147118                                                         | 1                                | 3002                             | "tags=41%, list=21%, signal=51%" |             |
| GSE21927_SPLEEN_VS_4T1_TUMOR_MONOCYTE_BALBC_DN                      |                                  |                                  |                                  |             |
| GSE21927_SPLEEN_VS_4T1_TUMOR_MONOCYTE_BALBC_DN 131                  |                                  |                                  |                                  |             |
| 0.37885886                                                          | 1.5380511                        | 0                                | 0.009267369 1                    |             |
| 2588                                                                | "tags=34%, list=18%, signal=41%" |                                  |                                  |             |
| GSE30962_ACUTE_VS_CHRONIC_LCMV_PRIMARY_INF_CD8_TCELL_UP             |                                  |                                  |                                  |             |
| GSE30962_ACUTE_VS_CHRONIC_LCMV_PRIMARY_INF_CD8_TCELL_UP             |                                  |                                  |                                  |             |
| 140                                                                 | 0.37366277                       | 1.5379957                        | 0.002164502                      |             |
| 0.009266393                                                         | 1                                | 2126                             | "tags=34%, list=15%, signal=40%" |             |
| GSE5589_LPS_AND_IL10_VS_LPS_AND_IL6_STIM_IL6_KO_MACROPHAGE_45MIN_DN |                                  |                                  |                                  |             |
| GSE5589_LPS_AND_IL10_VS_LPS_AND_IL6_STIM_IL6_KO_MACROPHAGE_45MIN_DN |                                  |                                  |                                  |             |
|                                                                     | 145                              | 0.36791486                       | 1.5376871                        | 0.002145923 |
| 0.009291806                                                         | 1                                | 3047                             | "tags=39%, list=22%, signal=50%" |             |
| GSE26030_UNSTIM_VS_RESTIM_TH1_DAY5_POST_POLARIZATION_DN             |                                  |                                  |                                  |             |
| GSE26030_UNSTIM_VS_RESTIM_TH1_DAY5_POST_POLARIZATION_DN             |                                  |                                  |                                  |             |
| 154                                                                 | 0.3704244                        | 1.5375109                        | 0.002141328                      |             |
| 0.00930221                                                          | 1                                | 1965                             | "tags=28%, list=14%, signal=32%" |             |
| GSE17721_0.5H_VS_12H_POLYIC_BMDC_UP                                 |                                  |                                  |                                  |             |
| GSE17721_0.5H_VS_12H_POLYIC_BMDC_UP 144                             |                                  |                                  |                                  |             |
| 0.36634168                                                          | 1.5374558                        | 0.002155172                      | 0.009302324                      |             |
| 1                                                                   | 1978                             | "tags=25%, list=14%, signal=29%" |                                  |             |
| GSE21927_SPLEEN_VS_TUMOR_MONOCYTE_BALBC_DN                          |                                  |                                  |                                  |             |
| GSE21927_SPLEEN_VS_TUMOR_MONOCYTE_BALBC_DN 129                      |                                  |                                  |                                  |             |
| 0.37908295                                                          | 1.5369778                        | 0.008474576                      | 0.009369599                      |             |
| 1                                                                   | 2055                             | "tags=33%, list=15%, signal=39%" |                                  |             |
| GSE3039_NKT_CELL_VS_B1_BCELL_DN GSE3039_NKT_CELL_VS_B1_BCELL_DN     |                                  |                                  |                                  |             |
|                                                                     | 134                              | 0.38108516                       | 1.5354729                        | 0.002227172 |
| 0.009540831                                                         | 1                                | 1901                             | "tags=26%, list=13%, signal=30%" |             |
| GSE16385_ROSIGLITAZONE_VS_UNTREATED_IFNG_TNF_STIM_MACROPHAGE_DN     |                                  |                                  |                                  |             |
| GSE16385_ROSIGLITAZONE_VS_UNTREATED_IFNG_TNF_STIM_MACROPHAGE_DN     |                                  |                                  |                                  |             |
|                                                                     | 143                              | 0.37292537                       | 1.5349915                        | 0.002024292 |
| 0.009584006                                                         | 1                                | 2479                             | "tags=34%, list=18%, signal=41%" |             |
| GSE30971_CTRL_VS_LPS_STIM_MACROPHAGE_WBP7_KO_2H_DN                  |                                  |                                  |                                  |             |
| GSE30971_CTRL_VS_LPS_STIM_MACROPHAGE_WBP7_KO_2H_DN 134              |                                  |                                  |                                  |             |

|                                                                   |             |                                  |                                  |
|-------------------------------------------------------------------|-------------|----------------------------------|----------------------------------|
| 0.37650427                                                        | 1.5336496   | 0.006048387                      | 0.009764202                      |
| 1                                                                 | 2118        | "tags=31%, list=15%, signal=36%" |                                  |
| GSE17721_CPG_VS_GARDIQUIMOD_6H_BMDC_DN                            |             |                                  |                                  |
| GSE17721_CPG_VS_GARDIQUIMOD_6H_BMDC_DN                            |             |                                  | 156                              |
| 0.3654791                                                         | 1.5327011   | 0.002118644                      | 0.009862682                      |
| 1                                                                 | 1733        | "tags=26%, list=12%, signal=30%" |                                  |
| GSE39820_CTRL_VS_TGFBETA3_IL6_IL23A_CD4_TCELL_DN                  |             |                                  |                                  |
| GSE39820_CTRL_VS_TGFBETA3_IL6_IL23A_CD4_TCELL_DN                  |             |                                  | 153                              |
| 0.3719422                                                         | 1.532474    | 0.006651885                      | 0.00988504                       |
| 2204                                                              |             | "tags=30%, list=16%, signal=35%" | 1                                |
| GSE17721_POLYIC_VS_CPG_0.5H_BMDC_DN                               |             |                                  |                                  |
| GSE17721_POLYIC_VS_CPG_0.5H_BMDC_DN                               |             |                                  | 147                              |
| 0.3720376                                                         | 1.5320238   | 0                                | 0.009938914                      |
| 2209                                                              |             | "tags=23%, list=16%, signal=27%" | 1                                |
| GSE41176_WT_VS_TAK1_KO_ANTI_IGM_STIM_BCELL_3H_DN                  |             |                                  |                                  |
| GSE41176_WT_VS_TAK1_KO_ANTI_IGM_STIM_BCELL_3H_DN                  |             |                                  | 154                              |
| 0.36923182                                                        | 1.5317096   | 0.002136752                      | 0.009975651                      |
| 1                                                                 | 1402        | "tags=23%, list=10%, signal=25%" |                                  |
| GSE7509_UNSTIM_VS_FCGRIIB_STIM_DC_DN                              |             |                                  |                                  |
| GSE7509_UNSTIM_VS_FCGRIIB_STIM_DC_DN                              |             |                                  | 144                              |
| 1.5305678                                                         | 0.007984032 | 0.01012488                       | 0.36788                          |
| 2358                                                              |             | "tags=36%, list=17%, signal=43%" | 1                                |
| GSE36891_UNSTIM_VS_PAM_TLR2_STIM_PERITONEAL_MACROPHAGE_DN         |             |                                  |                                  |
| GSE36891_UNSTIM_VS_PAM_TLR2_STIM_PERITONEAL_MACROPHAGE_DN         |             |                                  |                                  |
| 122                                                               | 0.38212347  | 1.5299678                        | 0.002105263                      |
| 0.010211033                                                       | 1           | 2138                             | "tags=33%, list=15%, signal=38%" |
| GSE10273_LOW_IL7_VS_HIGH_IL7_AND_IRF4_IN_IRF4_8_NULL_PRE_BCELL_DN |             |                                  |                                  |
| GSE10273_LOW_IL7_VS_HIGH_IL7_AND_IRF4_IN_IRF4_8_NULL_PRE_BCELL_DN |             |                                  |                                  |
| 123                                                               | 0.3760292   | 1.529665                         | 0.0041841                        |
| 0.010248644                                                       | 1           | 1608                             | "tags=23%, list=11%, signal=25%" |
| GSE42021_CD24HI_VS_CD24LOW_TCONV_THYMUS_UP                        |             |                                  |                                  |
| GSE42021_CD24HI_VS_CD24LOW_TCONV_THYMUS_UP                        |             |                                  | 149                              |
| 0.36993143                                                        | 1.5296364   | 0.002114165                      | 0.010247793                      |
| 1                                                                 | 1809        | "tags=23%, list=13%, signal=26%" |                                  |
| GSE27786_NKTCELL_VS_NEUTROPHIL_DN                                 |             |                                  |                                  |
| GSE27786_NKTCELL_VS_NEUTROPHIL_DN                                 |             |                                  |                                  |
| 144                                                               | 0.3691845   | 1.5295577                        | 0.008385744                      |
| 0.01024803                                                        | 1           | 1725                             | "tags=22%, list=12%, signal=24%" |
| GSE17721_CTRL_VS_GARDIQUIMOD_12H_BMDC_UP                          |             |                                  |                                  |
| GSE17721_CTRL_VS_GARDIQUIMOD_12H_BMDC_UP                          |             |                                  | 150                              |
| 0.36779213                                                        | 1.5292392   | 0.006237006                      | 0.010284326                      |
| 1                                                                 | 1667        | "tags=25%, list=12%, signal=28%" |                                  |
| GSE17721_0.5H_VS_4H_POLYIC_BMDC_UP                                |             |                                  |                                  |
| GSE17721_0.5H_VS_4H_POLYIC_BMDC_UP                                |             |                                  | 154                              |
| 0.36569053                                                        | 1.5289106   | 0.002004008                      | 0.010321557                      |
| 1                                                                 | 1854        | "tags=23%, list=13%, signal=27%" |                                  |
| GSE17721_0.5H_VS_24H_POLYIC_BMDC_UP                               |             |                                  |                                  |
| GSE17721_0.5H_VS_24H_POLYIC_BMDC_UP                               |             |                                  | 143                              |
| 0.37063235                                                        | 1.5286438   | 0.004338395                      | 0.010337502                      |
| 1                                                                 | 1864        | "tags=26%, list=13%, signal=30%" |                                  |
| GSE34179_THPOK_KO_VS_WT_VA14I_NKTCELL_DN                          |             |                                  |                                  |
| GSE34179_THPOK_KO_VS_WT_VA14I_NKTCELL_DN                          |             |                                  | 148                              |
| 0.37425154                                                        | 1.5279394   | 0                                | 0.010422776                      |
| 1828                                                              |             | "tags=23%, list=13%, signal=26%" | 1                                |
| GSE8384_CTRL_VS_B_ABORTUS_4H_MAC_CELL_LINE_UP                     |             |                                  |                                  |

|                                                                    |                                  |                                  |                                  |             |
|--------------------------------------------------------------------|----------------------------------|----------------------------------|----------------------------------|-------------|
| GSE8384_CTRL_VS_B_ABORTUS_4H_MAC_CELL_LINE_UP                      |                                  |                                  |                                  | 153         |
| 0.36688617                                                         | 1.5277096                        | 0.002070393                      | 0.010453215                      |             |
| 1                                                                  | 1848                             | "tags=27%, list=13%, signal=31%" |                                  |             |
| GSE14769_UNSTIM_VS_240MIN_LPS_BMDM_UP                              |                                  |                                  |                                  |             |
| GSE14769_UNSTIM_VS_240MIN_LPS_BMDM_UP                              |                                  |                                  | 150                              |             |
| 0.3667797                                                          | 1.5274115                        | 0                                | 0.010486809                      | 1           |
| 2271                                                               | "tags=31%, list=16%, signal=36%" |                                  |                                  |             |
| GSE21546_WT_VS_SAP1A_KO_AND_ELK1_KO_ANTI_CD3_STIM_DP_THYMOCYTES_DN |                                  |                                  |                                  |             |
| GSE21546_WT_VS_SAP1A_KO_AND_ELK1_KO_ANTI_CD3_STIM_DP_THYMOCYTES_DN |                                  |                                  |                                  |             |
|                                                                    | 149                              | 0.36729962                       | 1.5273368                        | 0.006342495 |
| 0.010485784                                                        | 1                                | 1511                             | "tags=24%, list=11%, signal=27%" |             |
| GSE25123_IL4_VS_IL4_AND_ROSIGLITAZONE_STIM_MACROPHAGE_DAY10_UP     |                                  |                                  |                                  |             |
| GSE25123_IL4_VS_IL4_AND_ROSIGLITAZONE_STIM_MACROPHAGE_DAY10_UP     |                                  |                                  |                                  |             |
|                                                                    | 156                              | 0.3674501                        | 1.5260090                        | 0.010665714 |
| 1                                                                  | 1802                             | "tags=28%, list=13%, signal=31%" |                                  |             |
| GSE3720_VD1_VS_VD2_GAMMADELTA_TCELL_DN                             |                                  |                                  |                                  |             |
| GSE3720_VD1_VS_VD2_GAMMADELTA_TCELL_DN                             |                                  |                                  | 149                              |             |
| 0.36688685                                                         | 1.5259145                        | 0.004366812                      | 0.010665628                      |             |
| 1                                                                  | 1270                             | "tags=19%, list=9%, signal=21%"  |                                  |             |
| GSE33425_CD161_INT_VS_NEG_CD8_TCELL_UP                             |                                  |                                  |                                  |             |
| GSE33425_CD161_INT_VS_NEG_CD8_TCELL_UP                             |                                  |                                  | 157                              |             |
| 0.36634162                                                         | 1.5258094                        | 0.004192872                      | 0.01067675                       |             |
| 1                                                                  | 2157                             | "tags=35%, list=15%, signal=41%" |                                  |             |
| GSE11961_PLASMA_CELL_DAY7_VS_MEMORY_BCELL_DAY40_UP                 |                                  |                                  |                                  |             |
| GSE11961_PLASMA_CELL_DAY7_VS_MEMORY_BCELL_DAY40_UP                 |                                  |                                  | 155                              |             |
| 0.36909673                                                         | 1.5257293                        | 0                                | 0.010677742                      | 1           |
| 2742                                                               | "tags=34%, list=19%, signal=42%" |                                  |                                  |             |
| GSE2770_IL12_AND_TGFB_ACT_VS_ACT_CD4_TCELL_2H_DN                   |                                  |                                  |                                  |             |
| GSE2770_IL12_AND_TGFB_ACT_VS_ACT_CD4_TCELL_2H_DN                   |                                  |                                  |                                  | 129         |
| 0.37709308                                                         | 1.5250784                        | 0.006329114                      | 0.010756509                      |             |
| 1                                                                  | 2155                             | "tags=33%, list=15%, signal=39%" |                                  |             |
| GSE14308_TH1_VS_NAIVE_CD4_TCELL_UP                                 |                                  |                                  |                                  |             |
| GSE14308_TH1_VS_NAIVE_CD4_TCELL_UP                                 |                                  |                                  | 140                              |             |
| 0.37181637                                                         | 1.5249889                        | 0                                | 0.010760752                      | 1           |
| 2817                                                               | "tags=41%, list=20%, signal=50%" |                                  |                                  |             |
| GSE6090_UNSTIM_VS_DC_SIGN_STIM_DC_UP                               |                                  |                                  |                                  |             |
| GSE6090_UNSTIM_VS_DC_SIGN_STIM_DC_UP                               |                                  |                                  | 132                              |             |
| 0.37502748                                                         | 1.5247959                        | 0                                | 0.01078276                       | 1           |
| 2393                                                               | "tags=29%, list=17%, signal=34%" |                                  |                                  |             |
| GSE11864_UNTREATED_VS_CSF1_PAM3CYS_IN_MAC_DN                       |                                  |                                  |                                  |             |
| GSE11864_UNTREATED_VS_CSF1_PAM3CYS_IN_MAC_DN                       |                                  |                                  |                                  | 131         |
| 0.37270728                                                         | 1.5247604                        | 0.004056795                      | 0.010777049                      |             |
| 1                                                                  | 2329                             | "tags=27%, list=17%, signal=32%" |                                  |             |
| GSE21927_UNTREATED_VS_GMCSF_IL6_TREATED_BONE_MARROW_UP             |                                  |                                  |                                  |             |
| GSE21927_UNTREATED_VS_GMCSF_IL6_TREATED_BONE_MARROW_UP             |                                  |                                  |                                  |             |
| 113                                                                | 0.38207603                       | 1.5245348                        | 0.004                            | 0.010795672 |
| 1                                                                  | 1810                             | "tags=23%, list=13%, signal=26%" |                                  |             |
| GSE29618_PDC_VS_MDC_DAY7_FLU_VACCINE_DN                            |                                  |                                  |                                  |             |
| GSE29618_PDC_VS_MDC_DAY7_FLU_VACCINE_DN                            |                                  |                                  | 152                              |             |
| 0.3640018                                                          | 1.5244014                        | 0.002020202                      | 0.010800011                      |             |
| 1                                                                  | 1682                             | "tags=30%, list=12%, signal=34%" |                                  |             |
| GSE5589_WT_VS_IL10_KO_LPS_STIM_MACROPHAGE_180MIN_UP                |                                  |                                  |                                  |             |
| GSE5589_WT_VS_IL10_KO_LPS_STIM_MACROPHAGE_180MIN_UP                |                                  |                                  |                                  |             |
| 122                                                                | 0.37819663                       | 1.5242573                        | 0.014861995                      |             |

|                                                                      |            |                                  |                                  |             |
|----------------------------------------------------------------------|------------|----------------------------------|----------------------------------|-------------|
| 0.010814182                                                          | 1          | 2564                             | "tags=38%, list=18%, signal=46%" |             |
| GSE23308_WT_VS_MINERALCORTICOID_REC_KO_MACROPHAGE_CORTICOSTERONE_TRE |            |                                  |                                  |             |
| ATED_DN                                                              |            |                                  |                                  |             |
| GSE23308_WT_VS_MINERALCORTICOID_REC_KO_MACROPHAGE_CORTICOSTERONE_TRE |            |                                  |                                  |             |
| ATED_DN                                                              | 156        | 0.3658038                        | 1.5239948                        | 0           |
| 0.010834836                                                          | 1          | 2051                             | "tags=30%, list=15%, signal=35%" |             |
| GSE27291_6H_VS_7D_STIM_GAMMADELTA_TCELL_UP                           |            |                                  |                                  |             |
| GSE27291_6H_VS_7D_STIM_GAMMADELTA_TCELL_UP                           |            |                                  |                                  | 137         |
| 0.37548038                                                           | 1.5239619  | 0.008298756                      | 0.010829106                      |             |
| 1                                                                    | 1842       | "tags=26%, list=13%, signal=29%" |                                  |             |
| GSE18791_CTRL_VS_NEWCASTLE_VIRUS_DC_10H_UP                           |            |                                  |                                  |             |
| GSE18791_CTRL_VS_NEWCASTLE_VIRUS_DC_10H_UP                           |            |                                  |                                  | 134         |
| 0.37094074                                                           | 1.5231556  | 0.002070393                      | 0.010934717                      |             |
| 1                                                                    | 2191       | "tags=28%, list=16%, signal=33%" |                                  |             |
| GSE12198_CTRL_VS_LOW_IL2_STIM_NK_CELL_DN                             |            |                                  |                                  |             |
| GSE12198_CTRL_VS_LOW_IL2_STIM_NK_CELL_DN                             |            |                                  |                                  | 153         |
| 0.37123618                                                           | 1.5230862  | 0.002109705                      | 0.010934319                      |             |
| 1                                                                    | 1508       | "tags=24%, list=11%, signal=26%" |                                  |             |
| GSE17721_POLYIC_VS_PAM3CSK4_6H_BMDC_DN                               |            |                                  |                                  |             |
| GSE17721_POLYIC_VS_PAM3CSK4_6H_BMDC_DN                               |            |                                  |                                  | 156         |
| 0.35964826                                                           | 1.5219603  | 0.002109705                      | 0.011088129                      |             |
| 1                                                                    | 2548       | "tags=35%, list=18%, signal=42%" |                                  |             |
| GSE45365_CD8A_DC_VS_CD11B_DC_UP                                      |            |                                  |                                  |             |
| GSE45365_CD8A_DC_VS_CD11B_DC_UP                                      |            |                                  |                                  |             |
| 135                                                                  | 0.37494016 | 1.5210376                        | 0.004237288                      |             |
| 0.011179043                                                          | 1          | 2033                             | "tags=22%, list=14%, signal=26%" |             |
| GSE8621_UNSTIM_VS_LPS_PRIMED_AND_LPS_STIM_MACROPHAGE_UP              |            |                                  |                                  |             |
| GSE8621_UNSTIM_VS_LPS_PRIMED_AND_LPS_STIM_MACROPHAGE_UP              |            |                                  |                                  |             |
| 157                                                                  | 0.3588075  | 1.5197031                        | 0.004255319                      |             |
| 0.011372644                                                          | 1          | 1490                             | "tags=17%, list=11%, signal=18%" |             |
| GSE4984_GALECTIN1_VS_LPS_STIM_DC_DN                                  |            |                                  |                                  |             |
| GSE4984_GALECTIN1_VS_LPS_STIM_DC_DN                                  |            |                                  |                                  | 128         |
| 0.37306765                                                           | 1.5197017  | 0.002118644                      | 0.011362015                      |             |
| 1                                                                    | 1997       | "tags=28%, list=14%, signal=32%" |                                  |             |
| GSE37416_CTRL_VS_6H_F_TULARENSIS_LVS_NEUTROPHIL_UP                   |            |                                  |                                  |             |
| GSE37416_CTRL_VS_6H_F_TULARENSIS_LVS_NEUTROPHIL_UP                   |            |                                  |                                  | 128         |
| 0.37767392                                                           | 1.5194628  | 0.00210084                       | 0.011378785                      |             |
| 1                                                                    | 2223       | "tags=34%, list=16%, signal=40%" |                                  |             |
| GSE13306_TREG_VS_TCONV_DN                                            |            |                                  |                                  |             |
| GSE13306_TREG_VS_TCONV_DN                                            |            |                                  |                                  | 141         |
| 0.36446953                                                           | 1.5191413  | 0.004301075                      | 0.011405407                      |             |
| 1                                                                    | 2189       | "tags=33%, list=16%, signal=38%" |                                  |             |
| GSE22886_NAIVE_TCELL_VS_NKCELL_UP                                    |            |                                  |                                  |             |
| GSE22886_NAIVE_TCELL_VS_NKCELL_UP                                    |            |                                  |                                  |             |
| 138                                                                  | 0.37112415 | 1.5191166                        | 0.006134969                      |             |
| 0.011395874                                                          | 1          | 1694                             | "tags=30%, list=12%, signal=33%" |             |
| GSE13485_DAY1_VS_DAY7_YF17D_VACCINE_PBMC_DN                          |            |                                  |                                  |             |
| GSE13485_DAY1_VS_DAY7_YF17D_VACCINE_PBMC_DN                          |            |                                  |                                  | 130         |
| 0.3801409                                                            | 1.5189819  | 0.00877193                       | 0.011404933                      |             |
| 1                                                                    | 1671       | "tags=34%, list=12%, signal=38%" |                                  |             |
| GSE46606_UNSTIM_VS_CD40L_IL2_IL5_DAY3_STIMULATED_BCELL_DN            |            |                                  |                                  |             |
| GSE46606_UNSTIM_VS_CD40L_IL2_IL5_DAY3_STIMULATED_BCELL_DN            |            |                                  |                                  |             |
| 136                                                                  | 0.3686041  | 1.5187749                        | 0                                | 0.011419357 |
| 1                                                                    | 2586       | "tags=36%, list=18%, signal=44%" |                                  |             |
| GSE17721_LPS_VS_GARDIQUIMOD_1H_BMDC_DN                               |            |                                  |                                  |             |
| GSE17721_LPS_VS_GARDIQUIMOD_1H_BMDC_DN                               |            |                                  |                                  | 153         |
| 0.3598188                                                            | 1.5185156  | 0.004166667                      | 0.011434947                      |             |

1 2200 "tags=28%, list=16%, signal=33%"  
GSE11961\_MARGINAL\_ZONE\_BCELL\_VS\_PLASMA\_CELL\_DAY7\_DN  
GSE11961\_MARGINAL\_ZONE\_BCELL\_VS\_PLASMA\_CELL\_DAY7\_DN  
136 0.36942083 1.5183568 0.010570824  
0.011450494 1 2252 "tags=32%, list=16%, signal=37%"  
GSE1112\_OT1\_VS\_HY\_CD8AB\_THYMOCYTE\_RT0C\_CULTURE\_UP  
GSE1112\_OT1\_VS\_HY\_CD8AB\_THYMOCYTE\_RT0C\_CULTURE\_UP 138  
0.37454724 1.518053 0.002141328 0.011483422 1  
2361 "tags=32%, list=17%, signal=38%"  
GSE22886\_IL2\_VS\_IL15\_STIM\_NKCELL\_DN  
GSE22886\_IL2\_VS\_IL15\_STIM\_NKCELL\_DN 139  
0.36867785 1.5180469 0.006535948 0.011473859  
1 2474 "tags=34%, list=18%, signal=41%"  
GSE22229\_RENAL\_TRANSPLANT\_IMMUNOSUPP\_THERAPY\_VS\_HEALTHY\_PBMC\_DN  
GSE22229\_RENAL\_TRANSPLANT\_IMMUNOSUPP\_THERAPY\_VS\_HEALTHY\_PBMC\_DN  
152 0.36462244 1.5176132 0.006696429  
0.011535997 1 1766 "tags=25%, list=13%, signal=28%"  
GSE360\_HIGH\_DOSE\_B\_MALAYI\_VS\_M\_TUBERCULOSIS\_MAC\_UP  
GSE360\_HIGH\_DOSE\_B\_MALAYI\_VS\_M\_TUBERCULOSIS\_MAC\_UP 142  
0.37037966 1.5156311 0.006507592 0.011823176  
1 2506 "tags=33%, list=18%, signal=40%"  
GSE10273\_HIGH\_IL7\_VS\_HIGH\_IL7\_AND\_IRF4\_IN\_IRF4\_8\_NULL\_PRE\_BCELL\_UP  
GSE10273\_HIGH\_IL7\_VS\_HIGH\_IL7\_AND\_IRF4\_IN\_IRF4\_8\_NULL\_PRE\_BCELL\_UP  
149 0.36688414 1.5145198 0.003992016  
0.011968679 1 2345 "tags=30%, list=17%, signal=35%"  
GSE14308\_TH17\_VS\_NATURAL\_TREG\_UP GSE14308\_TH17\_VS\_NATURAL\_TREG\_UP  
146 0.3695463 1.5141283 0.012219959  
0.012007459 1 1819 "tags=29%, list=13%, signal=33%"  
GSE17721\_LPS\_VS\_PAM3CSK4\_4H\_BMDC\_DN  
GSE17721\_LPS\_VS\_PAM3CSK4\_4H\_BMDC\_DN 142  
0.36624876 1.5136788 0.006048387 0.012060397  
1 2343 "tags=32%, list=17%, signal=38%"  
GSE17721\_0.5H\_VS\_12H\_LPS\_BMDC\_UP GSE17721\_0.5H\_VS\_12H\_LPS\_BMDC\_UP  
135 0.36798492 1.5135751 0  
0.012064413 1 1864 "tags=28%, list=13%, signal=32%"  
GSE22103\_LPS\_VS\_GMCSF\_AND\_IFNG\_STIM\_NEUTROPHIL\_UP  
GSE22103\_LPS\_VS\_GMCSF\_AND\_IFNG\_STIM\_NEUTROPHIL\_UP 132  
0.36782497 1.5133684 0.004395605 0.012083578  
1 2722 "tags=42%, list=19%, signal=51%"  
GSE2128\_C57BL6\_VS\_NOD\_THYMOCYTE\_MIMETOPE\_NEGATIVE\_SELECTION\_DN  
GSE2128\_C57BL6\_VS\_NOD\_THYMOCYTE\_MIMETOPE\_NEGATIVE\_SELECTION\_DN  
148 0.36532962 1.513077 0.002087683  
0.012117856 1 2424 "tags=34%, list=17%, signal=41%"  
GSE17721\_POLYIC\_VS\_GARDIQUIMOD\_6H\_BMDC\_DN  
GSE17721\_POLYIC\_VS\_GARDIQUIMOD\_6H\_BMDC\_DN 154  
0.36062643 1.5127738 0.002164502 0.012165108  
1 2611 "tags=36%, list=19%, signal=43%"  
GSE21379\_WT\_VS\_SAP\_KO\_CD4\_TCELL\_DN  
GSE21379\_WT\_VS\_SAP\_KO\_CD4\_TCELL\_DN 149  
0.36236355 1.5122517 0.006024096 0.012229487  
1 1515 "tags=23%, list=11%, signal=26%"  
GSE25123\_IL4\_VS\_IL4\_AND\_ROSIGLITAZONE\_STIM\_PPARG\_KO\_MACROPHAGE\_DAY10  
\_UP  
GSE25123\_IL4\_VS\_IL4\_AND\_ROSIGLITAZONE\_STIM\_PPARG\_KO\_MACROPHAGE\_DAY10

|                                                                   |                                                                   |             |             |                                  |
|-------------------------------------------------------------------|-------------------------------------------------------------------|-------------|-------------|----------------------------------|
| _UP                                                               | 107                                                               | 0.3781922   | 1.5109183   |                                  |
| 0.005928854                                                       | 0.012440501                                                       | 1           | 2180        | "tags=29%, list=15%, signal=34%" |
| GSE11924_TFH_VS_TH2_CD4_TCELL_DN                                  | GSE11924_TFH_VS_TH2_CD4_TCELL_DN                                  |             |             |                                  |
| 144                                                               | 0.36461774                                                        | 1.5109007   | 0.004175365 |                                  |
| 0.012432341                                                       | 1                                                                 | 2381        |             | "tags=30%, list=17%, signal=36%" |
| GSE32901_TH1_VS_TH17_NEG_CD4_TCELL_DN                             | GSE32901_TH1_VS_TH17_NEG_CD4_TCELL_DN                             |             |             |                                  |
| 0.39116958                                                        | 1.5106761                                                         | 0.00203666  | 93          | 0.01246173                       |
| 1                                                                 | 764                                                               |             |             | "tags=17%, list=5%, signal=18%"  |
| GSE4142_PLASMA_CELL_VS_GC_BCELL_DN                                | GSE4142_PLASMA_CELL_VS_GC_BCELL_DN                                |             |             |                                  |
| 0.37292242                                                        | 1.5105668                                                         | 0.00678733  | 138         | 0.012465359                      |
| 1                                                                 | 1972                                                              |             |             | "tags=31%, list=14%, signal=36%" |
| GSE5589_UNSTIM_VS_45MIN_LPS_STIM_MACROPHAGE_UP                    | GSE5589_UNSTIM_VS_45MIN_LPS_STIM_MACROPHAGE_UP                    |             |             |                                  |
| 0.36573938                                                        | 1.5103135                                                         | 0.002087683 | 153         | 0.01248944                       |
| 1                                                                 | 2744                                                              |             |             | "tags=36%, list=19%, signal=44%" |
| GSE17974_CTRL_VS_ACT_IL4_AND_ANTI_IL12_12H_CD4_TCELL_DN           | GSE17974_CTRL_VS_ACT_IL4_AND_ANTI_IL12_12H_CD4_TCELL_DN           |             |             |                                  |
| 143                                                               | 0.3680829                                                         | 1.5100245   | 0.00589391  |                                  |
| 0.012539035                                                       | 1                                                                 | 1750        |             | "tags=31%, list=12%, signal=36%" |
| GSE44955_MCSF_VS_MCSF_AND_IL27_STIM_MACROPHAGE_UP                 | GSE44955_MCSF_VS_MCSF_AND_IL27_STIM_MACROPHAGE_UP                 |             |             |                                  |
| 0.36341053                                                        | 1.5100145                                                         | 0.009009009 | 144         | 0.012528664                      |
| 1                                                                 | 2339                                                              |             |             | "tags=31%, list=17%, signal=37%" |
| GSE18893_CTRL_VS_TNF_TREATED_TCONV_2H_DN                          | GSE18893_CTRL_VS_TNF_TREATED_TCONV_2H_DN                          |             |             |                                  |
| 0.36628503                                                        | 1.5091122                                                         | 0.004175365 | 139         | 0.012640331                      |
| 1                                                                 | 2345                                                              |             |             | "tags=29%, list=17%, signal=35%" |
| GSE369_IFNG_KO_VS_WT_LIVER_DN                                     | GSE369_IFNG_KO_VS_WT_LIVER_DN                                     |             |             |                                  |
| 0.01284928                                                        | 141                                                               | 0.36458054  | 1.5078237   | 0.003929273                      |
| 1                                                                 | 2660                                                              |             |             | "tags=36%, list=19%, signal=44%" |
| GSE32423_CTRL_VS_IL4_MEMORY_CD8_TCELL_DN                          | GSE32423_CTRL_VS_IL4_MEMORY_CD8_TCELL_DN                          |             |             |                                  |
| 0.36687726                                                        | 1.5073799                                                         | 0.00204918  | 139         | 0.012916703                      |
| 1                                                                 | 2336                                                              |             |             | "tags=32%, list=17%, signal=38%" |
| GSE22196_HEALTHY_VS_OBESE_MOUSE_SKIN_GAMMADELTA_TCELL_UP          | GSE22196_HEALTHY_VS_OBESE_MOUSE_SKIN_GAMMADELTA_TCELL_UP          |             |             |                                  |
| 0.012952987                                                       | 142                                                               | 0.36083168  | 1.5071192   | 0.00212766                       |
| 1                                                                 | 1521                                                              |             |             | "tags=25%, list=11%, signal=28%" |
| GSE23568_CTRL_TRANSDUCE_VS_WT_CD8_TCELL_DN                        | GSE23568_CTRL_TRANSDUCE_VS_WT_CD8_TCELL_DN                        |             |             |                                  |
| 0.35887402                                                        | 1.5068821                                                         | 0.004115226 | 165         | 0.012980676                      |
| 1                                                                 | 2275                                                              |             |             | "tags=38%, list=16%, signal=44%" |
| GSE18791_CTRL_VS_NEWCASTLE_VIRUS_DC_4H_UP                         | GSE18791_CTRL_VS_NEWCASTLE_VIRUS_DC_4H_UP                         |             |             |                                  |
| 0.37582988                                                        | 1.5066642                                                         | 0.010638298 | 115         | 0.013002979                      |
| 1                                                                 | 1920                                                              |             |             | "tags=27%, list=14%, signal=31%" |
| GSE5589_UNSTIM_VS_45MIN_LPS_AND_IL6_STIM_MACROPHAGE_DN            | GSE5589_UNSTIM_VS_45MIN_LPS_AND_IL6_STIM_MACROPHAGE_DN            |             |             |                                  |
| 0.013113609                                                       | 144                                                               | 0.36176     | 1.5058805   | 0.00631579                       |
| 1                                                                 | 2586                                                              |             |             | "tags=32%, list=18%, signal=39%" |
| GSE40274_FOXP3_VS_FOXP3_AND_PBX1_TRANSDUCE_ACTIVATED_CD4_TCELL_UP | GSE40274_FOXP3_VS_FOXP3_AND_PBX1_TRANSDUCE_ACTIVATED_CD4_TCELL_UP |             |             |                                  |



GSE40274\_FOXP3\_VS\_FOXP3\_AND\_PBX1\_TRANSDUCED\_ACTIVATED\_CD4\_TCELL\_UP  
144 0.3629832 1.5044116 0.002173913  
0.01334692 1 2003 "tags=31%, list=14%, signal=35%"  
GSE18893\_TCONV\_VS\_TREG\_2H\_CULTURE\_DN  
GSE18893\_TCONV\_VS\_TREG\_2H\_CULTURE\_DN 153  
0.36407697 1.5038337 0.00409836 0.013426553  
1 2274 "tags=36%, list=16%, signal=42%"  
GSE21546\_WT\_VS\_SAP1A\_KO\_ANTI\_CD3\_STIM\_DP\_THYMOCYTES\_UP  
GSE21546\_WT\_VS\_SAP1A\_KO\_ANTI\_CD3\_STIM\_DP\_THYMOCYTES\_UP  
137 0.3650449 1.5037044 0.006451613  
0.01344082 1 1725 "tags=25%, list=12%, signal=28%"  
GSE43955\_TH0\_VS\_TGFB\_IL6\_TH17\_ACT\_CD4\_TCELL\_42H\_UP  
GSE43955\_TH0\_VS\_TGFB\_IL6\_TH17\_ACT\_CD4\_TCELL\_42H\_UP 156  
0.35822067 1.5034692 0.00660793 0.013461581  
1 2706 "tags=37%, list=19%, signal=45%"  
GSE1460\_CD4\_THYMOCYTE\_VS\_NAIVE\_CD4\_TCELL\_CORD\_BLOOD\_UP  
GSE1460\_CD4\_THYMOCYTE\_VS\_NAIVE\_CD4\_TCELL\_CORD\_BLOOD\_UP  
159 0.36587507 1.5018126 0.006036217  
0.013721551 1 2462 "tags=38%, list=17%, signal=45%"  
GSE13484\_UNSTIM\_VS\_12H\_YF17D\_VACCINE\_STIM\_PBMC\_UP  
GSE13484\_UNSTIM\_VS\_12H\_YF17D\_VACCINE\_STIM\_PBMC\_UP 138  
0.36564752 1.501612 0.010638298 0.013744262 1  
2679 "tags=33%, list=19%, signal=40%"  
GSE17721\_LPS\_VS\_PAM3CSK4\_24H\_BMDC\_DN  
GSE17721\_LPS\_VS\_PAM3CSK4\_24H\_BMDC\_DN 146  
0.36712527 1.5013404 0.004444445 0.013789982  
1 2533 "tags=35%, list=18%, signal=42%"  
GSE40274\_CTRL\_VS\_SATB1\_TRANSDUCED\_ACTIVATED\_CD4\_TCELL\_UP  
GSE40274\_CTRL\_VS\_SATB1\_TRANSDUCED\_ACTIVATED\_CD4\_TCELL\_UP  
138 0.3624638 1.5012419 0.008528785  
0.013793511 1 1592 "tags=23%, list=11%, signal=26%"  
GSE23984\_CTRL\_VS\_HYPOCALEMIC\_VITAMIND\_ANALOG\_TCELL\_UP  
GSE23984\_CTRL\_VS\_HYPOCALEMIC\_VITAMIND\_ANALOG\_TCELL\_UP  
149 0.36444494 1.5008947 0.004219409  
0.013846589 1 2616 "tags=40%, list=19%, signal=48%"  
GSE5542\_UNTREATED\_VS\_IFNG\_TREATED\_EPITHELIAL\_CELLS\_24H\_UP  
GSE5542\_UNTREATED\_VS\_IFNG\_TREATED\_EPITHELIAL\_CELLS\_24H\_UP  
151 0.3638981 1.5006057 0.004024145  
0.013891164 1 2030 "tags=32%, list=14%, signal=37%"  
GSE6259\_FLT3L\_INDUCED\_33D1\_POS\_DC\_VS\_BCELL\_DN  
GSE6259\_FLT3L\_INDUCED\_33D1\_POS\_DC\_VS\_BCELL\_DN 148  
0.36309522 1.5005317 0.004048583 0.013896558  
1 2422 "tags=36%, list=17%, signal=44%"  
GSE13522\_CTRL\_VS\_T\_CRUZI\_Y\_STRAIN\_INF\_SKIN\_BALBC\_MOUSE\_UP  
GSE13522\_CTRL\_VS\_T\_CRUZI\_Y\_STRAIN\_INF\_SKIN\_BALBC\_MOUSE\_UP  
103 0.37946093 1.5000446 0.010799136  
0.013953796 1 1829 "tags=26%, list=13%, signal=30%"  
GSE17721\_CTRL\_VS\_POLYIC\_0.5H\_BMDC\_UP  
GSE17721\_CTRL\_VS\_POLYIC\_0.5H\_BMDC\_UP 159  
0.35997882 1.4996624 0.002109705 0.014014769  
1 2421 "tags=31%, list=17%, signal=37%"  
GSE29618\_PDC\_VS\_MDC\_DN GSE29618\_PDC\_VS\_MDC\_DN 141  
0.36473653 1.4991477 0.013916501 0.014092472  
1 1809 "tags=31%, list=13%, signal=35%"

GSE1460\_INTRATHYMIC\_T\_PROGENITOR\_VS\_CD4\_THYMOCYTE\_UP  
GSE1460\_INTRATHYMIC\_T\_PROGENITOR\_VS\_CD4\_THYMOCYTE\_UP  
151 0.3555643 1.4990509 0.00409836  
0.014099769 1 1239 "tags=26%, list=9%, signal=28%"  
GSE23321\_EFFECTOR\_MEMORY\_VS\_NAIVE\_CD8\_TCELL\_DN  
GSE23321\_EFFECTOR\_MEMORY\_VS\_NAIVE\_CD8\_TCELL\_DN 129  
0.36852705 1.498598 0.004329004 0.014182856 1  
2222 "tags=29%, list=16%, signal=35%"  
GSE20198\_IL12\_VS\_IFNA\_TREATED\_ACT\_CD4\_TCELL\_UP  
GSE20198\_IL12\_VS\_IFNA\_TREATED\_ACT\_CD4\_TCELL\_UP 136  
0.36766633 1.498243 0.004454343 0.014242408 1  
2892 "tags=36%, list=20%, signal=45%"  
GSE18791\_CTRL\_VS\_NEWCASTLE\_VIRUS\_DC\_12H\_UP  
GSE18791\_CTRL\_VS\_NEWCASTLE\_VIRUS\_DC\_12H\_UP 129  
0.36639905 1.4979451 0.006289308 0.014283114  
1 2282 "tags=29%, list=16%, signal=34%"  
GSE9037\_WT\_VS\_IRAK4\_KO\_LPS\_1H\_STIM\_BMDM\_DN  
GSE9037\_WT\_VS\_IRAK4\_KO\_LPS\_1H\_STIM\_BMDM\_DN 135  
0.36754328 1.4977012 0.006437768 0.014315377  
1 703 "tags=13%, list=5%, signal=13%"  
GSE17721\_0.5H\_VS\_24H\_CPG\_BMDC\_UP GSE17721\_0.5H\_VS\_24H\_CPG\_BMDC\_UP  
149 0.35797822 1.4972688 0.004273505  
0.014367272 1 1581 "tags=23%, list=11%, signal=26%"  
GSE22886\_NAIVE\_CD8\_TCELL\_VS\_DC\_DN GSE22886\_NAIVE\_CD8\_TCELL\_VS\_DC\_DN  
156 0.3575303 1.496768 0.00203666  
0.014444572 1 2213 "tags=33%, list=16%, signal=39%"  
GSE42021\_TCONV\_PLN\_VS\_CD24LO\_TCONV\_THYMUS\_DN  
GSE42021\_TCONV\_PLN\_VS\_CD24LO\_TCONV\_THYMUS\_DN 151  
0.35764948 1.4964699 0.00625 0.014488023 1  
1701 "tags=23%, list=12%, signal=25%"  
GSE29618\_BCELL\_VS\_PDC\_DN GSE29618\_BCELL\_VS\_PDC\_DN 156  
0.3564622 1.4963185 0.002053388 0.01450218  
1 1844 "tags=27%, list=13%, signal=31%"  
GSE17721\_POLYIC\_VS\_GARDIQUIMOD\_4H\_BMDC\_UP  
GSE17721\_POLYIC\_VS\_GARDIQUIMOD\_4H\_BMDC\_UP 152  
0.35700363 1.4953816 0.004106776 0.014645564  
1 2382 "tags=28%, list=17%, signal=33%"  
GSE46242\_CTRL\_VS\_EGR2\_DELETED\_ANERGIC\_TH1\_CD4\_TCELL\_UP  
GSE46242\_CTRL\_VS\_EGR2\_DELETED\_ANERGIC\_TH1\_CD4\_TCELL\_UP  
134 0.36757842 1.4945228 0.008368201  
0.014814527 1 1388 "tags=25%, list=10%, signal=28%"  
GSE19923\_E2A\_KO\_VS\_HEB\_AND\_E2A\_KO\_DP\_THYMOCYTE\_UP  
GSE19923\_E2A\_KO\_VS\_HEB\_AND\_E2A\_KO\_DP\_THYMOCYTE\_UP 153  
0.35769972 1.4943154 0.00390625 0.014836695  
1 1719 "tags=27%, list=12%, signal=31%"  
GSE8921\_UNSTIM\_0H\_VS\_TLR1\_2\_STIM\_MONOCYTE\_6H\_UP  
GSE8921\_UNSTIM\_0H\_VS\_TLR1\_2\_STIM\_MONOCYTE\_6H\_UP 145  
0.36488733 1.4942787 0.008421052 0.014833999  
1 2114 "tags=28%, list=15%, signal=33%"  
GSE27786\_NKCELL\_VS\_MONO\_MAC\_DN GSE27786\_NKCELL\_VS\_MONO\_MAC\_DN  
143 0.3660644 1.4940943 0.006382979  
0.014855096 1 1924 "tags=24%, list=14%, signal=28%"  
GSE26351\_UNSTIM\_VS\_BMP\_PATHWAY\_STIM\_HEMATOPOIETIC\_PROGENITORS\_DN  
GSE26351\_UNSTIM\_VS\_BMP\_PATHWAY\_STIM\_HEMATOPOIETIC\_PROGENITORS\_DN

|                                                               |                                  |                                  |                                  |             |     |
|---------------------------------------------------------------|----------------------------------|----------------------------------|----------------------------------|-------------|-----|
|                                                               | 133                              | 0.37019682                       | 1.494075                         | 0.012195122 |     |
| 0.014847125                                                   | 1                                | 2539                             | "tags=34%, list=18%, signal=41%" |             |     |
| GSE1460_DP_VS_CD4_THYMOCYTE_UP                                |                                  |                                  | GSE1460_DP_VS_CD4_THYMOCYTE_UP   |             |     |
|                                                               | 157                              | 0.35876453                       | 1.4937514                        | 0.004237288 |     |
| 0.014892099                                                   | 1                                | 1882                             | "tags=27%, list=13%, signal=31%" |             |     |
| GSE360_LOW_DOSE_B_MALAYI_VS_M_TUBERCULOSIS_MAC_UP             |                                  |                                  |                                  |             |     |
| GSE360_LOW_DOSE_B_MALAYI_VS_M_TUBERCULOSIS_MAC_UP             |                                  |                                  |                                  |             | 149 |
| 0.36161983                                                    |                                  | 1.4927943                        | 0.004048583                      | 0.015047675 |     |
| 1                                                             | 1880                             | "tags=27%, list=13%, signal=31%" |                                  |             |     |
| GSE17721_CPG_VS_GARDIQUIMOD_24H_BMDC_UP                       |                                  |                                  |                                  |             |     |
| GSE17721_CPG_VS_GARDIQUIMOD_24H_BMDC_UP                       |                                  |                                  |                                  |             | 154 |
| 0.35722667                                                    |                                  | 1.4919659                        | 0.00862069                       | 0.015207166 |     |
| 1                                                             | 1580                             | "tags=20%, list=11%, signal=22%" |                                  |             |     |
| GSE17974_0H_VS_6H_IN_VITRO_ACT_CD4_TCELL_DN                   |                                  |                                  |                                  |             |     |
| GSE17974_0H_VS_6H_IN_VITRO_ACT_CD4_TCELL_DN                   |                                  |                                  |                                  |             | 147 |
| 0.36211604                                                    |                                  | 1.4917401                        | 0.004705882                      | 0.015239004 |     |
| 1                                                             | 1426                             | "tags=27%, list=10%, signal=29%" |                                  |             |     |
| GSE34515_CD16_NEG_MONOCYTE_VS_DC_DN                           |                                  |                                  |                                  |             |     |
| GSE34515_CD16_NEG_MONOCYTE_VS_DC_DN                           |                                  |                                  |                                  |             | 145 |
| 0.36819366                                                    |                                  | 1.4914463                        | 0.008948546                      | 0.015286383 |     |
| 1                                                             | 1498                             | "tags=24%, list=11%, signal=27%" |                                  |             |     |
| GSE17721_LPS_VS_CPG_6H_BMDC_DN                                |                                  |                                  | GSE17721_LPS_VS_CPG_6H_BMDC_DN   |             |     |
|                                                               | 145                              | 0.3584711                        | 1.4913207                        | 0.002173913 |     |
| 0.015292518                                                   | 1                                | 2533                             | "tags=33%, list=18%, signal=40%" |             |     |
| GSE17721_0.5H_VS_8H_PAM3CSK4_BMDC_UP                          |                                  |                                  |                                  |             |     |
| GSE17721_0.5H_VS_8H_PAM3CSK4_BMDC_UP                          |                                  |                                  |                                  |             | 150 |
| 0.3607117                                                     |                                  | 1.4912603                        | 0.00209205                       | 0.015292488 |     |
| 1                                                             | 2767                             | "tags=41%, list=20%, signal=50%" |                                  |             |     |
| GSE17721_0.5H_VS_4H_CPG_BMDC_UP                               |                                  |                                  | GSE17721_0.5H_VS_4H_CPG_BMDC_UP  |             |     |
|                                                               | 151                              | 0.3572927                        | 1.491119                         | 0.002053388 |     |
| 0.015305852                                                   | 1                                | 1722                             | "tags=27%, list=12%, signal=31%" |             |     |
| GSE17721_CTRL_VS_PAM3CSK4_12H_BMDC_UP                         |                                  |                                  |                                  |             |     |
| GSE17721_CTRL_VS_PAM3CSK4_12H_BMDC_UP                         |                                  |                                  |                                  |             | 151 |
| 0.35581696                                                    |                                  | 1.4906                           | 0.010183299                      | 0.015398362 | 1   |
| 1371                                                          | "tags=19%, list=10%, signal=21%" |                                  |                                  |             |     |
| GSE4142_NAIVE_VS_GC_BCELL_DN                                  |                                  |                                  | GSE4142_NAIVE_VS_GC_BCELL_DN     |             |     |
|                                                               | 132                              | 0.3658771                        | 1.4902703                        | 0.004237288 |     |
| 0.015446419                                                   | 1                                | 2135                             | "tags=27%, list=15%, signal=32%" |             |     |
| GSE36826_NORMAL_VS_STAPH_AUREUS_INF_IL1R_KO_SKIN_DN           |                                  |                                  |                                  |             |     |
| GSE36826_NORMAL_VS_STAPH_AUREUS_INF_IL1R_KO_SKIN_DN           |                                  |                                  |                                  |             |     |
| 143                                                           | 0.3651143                        | 1.4899192                        | 0.008016032                      |             |     |
| 0.015507878                                                   | 1                                | 1966                             | "tags=33%, list=14%, signal=38%" |             |     |
| GSE17186_MEMORY_VS_CD21HIGH_TRANSITIONAL_BCELL_DN             |                                  |                                  |                                  |             |     |
| GSE17186_MEMORY_VS_CD21HIGH_TRANSITIONAL_BCELL_DN             |                                  |                                  |                                  |             | 161 |
| 0.36083525                                                    |                                  | 1.4895058                        | 0                                | 0.015564142 | 1   |
| 2229                                                          | "tags=35%, list=16%, signal=42%" |                                  |                                  |             |     |
| GSE22886_NAIVE_TCELL_VS_DC_DN                                 |                                  |                                  | GSE22886_NAIVE_TCELL_VS_DC_DN    |             |     |
|                                                               | 164                              | 0.35179883                       | 1.4863182                        | 0.006198347 |     |
| 0.01616872                                                    | 1                                | 2181                             | "tags=34%, list=15%, signal=39%" |             |     |
| GSE42021_TCONV_PLN_VS_CD24HI_TCONV_THYMUS_DN                  |                                  |                                  |                                  |             |     |
| GSE42021_TCONV_PLN_VS_CD24HI_TCONV_THYMUS_DN                  |                                  |                                  |                                  |             | 141 |
| 0.36258808                                                    |                                  | 1.4857934                        | 0.008350731                      | 0.016274525 |     |
| 1                                                             | 1637                             | "tags=23%, list=12%, signal=26%" |                                  |             |     |
| GSE22935_UNSTIM_VS_12H_MBOVIS_BCG_STIM_MYD88_KO_MACROPHAGE_DN |                                  |                                  |                                  |             |     |

GSE22935\_UNSTIM\_VS\_12H\_MBOVIS\_BCG\_STIM\_MYD88\_KO\_MACROPHAGE\_DN  
131 0.36799937 1.4855201 0.006185567  
0.01631467 1 2355 "tags=34%, list=17%, signal=41%"  
GSE22886\_NAIVE\_CD8\_TCELL\_VS\_NEUTROPHIL\_UP  
GSE22886\_NAIVE\_CD8\_TCELL\_VS\_NEUTROPHIL\_UP 141  
0.3572779 1.4850193 0.006263048 0.016406735  
1 2739 "tags=40%, list=19%, signal=49%"  
GSE40666\_WT\_VS\_STAT4\_KO\_CD8\_TCELL\_DN  
GSE40666\_WT\_VS\_STAT4\_KO\_CD8\_TCELL\_DN 123  
0.3679055 1.4842137 0.008298756 0.016548593  
1 1691 "tags=28%, list=12%, signal=32%"  
GSE360\_L\_MAJOR\_VS\_T\_GONDII\_MAC\_DN GSE360\_L\_MAJOR\_VS\_T\_GONDII\_MAC\_DN  
147 0.3568946 1.4837985 0.006263048  
0.016630929 1 1740 "tags=25%, list=12%, signal=28%"  
GSE26495\_NAIVE\_VS\_PD1LOW\_CD8\_TCELL\_DN  
GSE26495\_NAIVE\_VS\_PD1LOW\_CD8\_TCELL\_DN 141  
0.3619825 1.4830662 0.010893246 0.016759332  
1 2274 "tags=32%, list=16%, signal=38%"  
GSE17721\_PAM3CSK4\_VS\_GADIQUIMOD\_4H\_BMDC\_UP  
GSE17721\_PAM3CSK4\_VS\_GADIQUIMOD\_4H\_BMDC\_UP 159  
0.35315955 1.4830421 0.012903226 0.016748898  
1 1640 "tags=23%, list=12%, signal=25%"  
GSE3982\_NEUTROPHIL\_VS\_NKCELL\_UP GSE3982\_NEUTROPHIL\_VS\_NKCELL\_UP  
149 0.3549093 1.4823753 0.01814059  
0.016889129 1 2027 "tags=28%, list=14%, signal=33%"  
GSE19888\_NO\_PRETREAT\_VS\_ADENOSINE\_A3R\_INHIBITOR\_PRETREATED\_MAST\_CELL  
\_TCELL\_MEMBRANES\_ACT\_UP  
GSE19888\_NO\_PRETREAT\_VS\_ADENOSINE\_A3R\_INHIBITOR\_PRETREATED\_MAST\_CELL  
\_TCELL\_MEMBRANES\_ACT\_UP 139 0.35694954  
1.4820433 0.010822511 0.016943432 1  
2636 "tags=35%, list=19%, signal=42%"  
GSE32128\_INOS\_DEPENDENT\_VS\_INOS\_INDEPENDENT\_ACTIVATED\_TCELL\_UP  
GSE32128\_INOS\_DEPENDENT\_VS\_INOS\_INDEPENDENT\_ACTIVATED\_TCELL\_UP  
162 0.35074562 1.4820291 0.004048583  
0.016930759 1 2840 "tags=36%, list=20%, signal=45%"  
GSE11864\_CSF1\_IFNG\_VS\_CSF1\_PAM3CYS\_IN\_MAC\_UP  
GSE11864\_CSF1\_IFNG\_VS\_CSF1\_PAM3CYS\_IN\_MAC\_UP 136  
0.35838184 1.4818418 0.010162601 0.016951606  
1 1705 "tags=28%, list=12%, signal=31%"  
GSE21927\_SPLEEN\_C57BL6\_VS\_4T1\_TUMOR\_BALBC\_MONOCYTES\_UP  
GSE21927\_SPLEEN\_C57BL6\_VS\_4T1\_TUMOR\_BALBC\_MONOCYTES\_UP  
129 0.36709934 1.4815247 0.012396694  
0.0169967 1 1796 "tags=25%, list=13%, signal=28%"  
GSE360\_CTRL\_VS\_B\_MALAYI\_LOW\_DOSE\_MAC\_UP  
GSE360\_CTRL\_VS\_B\_MALAYI\_LOW\_DOSE\_MAC\_UP 152  
0.3597263 1.48116 0.006085193 0.017059112 1  
2370 "tags=33%, list=17%, signal=39%"  
GSE29618\_LAIV\_VS\_TIV\_FLU\_VACCINE\_DAY7\_MONOCYTE\_UP  
GSE29618\_LAIV\_VS\_TIV\_FLU\_VACCINE\_DAY7\_MONOCYTE\_UP 137  
0.36171207 1.4810128 0.008333334 0.017076856  
1 1371 "tags=17%, list=10%, signal=18%"  
GSE339\_CD8POS\_VS\_CD4CD8DN\_DC\_IN\_CULTURE\_DN  
GSE339\_CD8POS\_VS\_CD4CD8DN\_DC\_IN\_CULTURE\_DN 154  
0.36006603 1.4809526 0.004056795 0.01707734

|                                                                        |            |                                  |                                  |     |
|------------------------------------------------------------------------|------------|----------------------------------|----------------------------------|-----|
| 1                                                                      | 2094       | "tags=33%, list=15%, signal=38%" |                                  |     |
| GSE22886_CD4_TCELL_VS_BCELL_NAIVE_UP                                   |            |                                  |                                  |     |
| GSE22886_CD4_TCELL_VS_BCELL_NAIVE_UP                                   |            |                                  |                                  |     |
| 0.35573202                                                             | 1.4808233  | 0.012987013                      | 0.017093018                      | 156 |
| 1                                                                      | 2265       | "tags=38%, list=16%, signal=45%" |                                  |     |
| GSE17721_CTRL_VS_PAM3CSK4_6H_BMDC_DN                                   |            |                                  |                                  |     |
| GSE17721_CTRL_VS_PAM3CSK4_6H_BMDC_DN                                   |            |                                  |                                  |     |
| 0.35939032                                                             | 1.4800344  | 0.00862069                       | 0.017246848                      | 148 |
| 1                                                                      | 1626       | "tags=24%, list=12%, signal=26%" |                                  |     |
| GSE13485_PRE_VS_POST_YF17D_VACCINATION_PBMC_DN                         |            |                                  |                                  |     |
| GSE13485_PRE_VS_POST_YF17D_VACCINATION_PBMC_DN                         |            |                                  |                                  |     |
| 0.36370072                                                             | 1.4796779  | 0.006493507                      | 0.017313674                      | 141 |
| 1                                                                      | 2383       | "tags=36%, list=17%, signal=43%" |                                  |     |
| GSE17721_CTRL_VS_GARDIQUIMOD_0.5H_BMDC_UP                              |            |                                  |                                  |     |
| GSE17721_CTRL_VS_GARDIQUIMOD_0.5H_BMDC_UP                              |            |                                  |                                  |     |
| 0.35339156                                                             | 1.4787512  | 0.008385744                      | 0.017504988                      | 150 |
| 1                                                                      | 2349       | "tags=34%, list=17%, signal=40%" |                                  |     |
| GSE10147_IL3_AND_HIVP17_VS_IL3_AND_CPG_STIM_PDC_DN                     |            |                                  |                                  |     |
| GSE10147_IL3_AND_HIVP17_VS_IL3_AND_CPG_STIM_PDC_DN                     |            |                                  |                                  |     |
| 0.3693053                                                              | 1.4784214  | 0.008438818                      | 0.017550407                      | 120 |
| 1                                                                      | 2008       | "tags=29%, list=14%, signal=34%" |                                  |     |
| GSE22886_DAY1_VS_DAY7_MONOCYTE_IN_CULTURE_DN                           |            |                                  |                                  |     |
| GSE22886_DAY1_VS_DAY7_MONOCYTE_IN_CULTURE_DN                           |            |                                  |                                  |     |
| 0.35478818                                                             | 1.4768791  | 0.002114165                      | 0.017859615                      | 161 |
| 1                                                                      | 2430       | "tags=39%, list=17%, signal=46%" |                                  |     |
| GSE43955_1H_VS_10H_ACT_CD4_TCELL_UP                                    |            |                                  |                                  |     |
| GSE43955_1H_VS_10H_ACT_CD4_TCELL_UP                                    |            |                                  |                                  |     |
| 0.35244438                                                             | 1.4766557  | 0.013245033                      | 0.017884742                      | 152 |
| 1                                                                      | 2996       | "tags=39%, list=21%, signal=50%" |                                  |     |
| GSE3565_DUSP1_VS_WT_SPLENOCYTES_POST_LPS_INJECTION_DN                  |            |                                  |                                  |     |
| GSE3565_DUSP1_VS_WT_SPLENOCYTES_POST_LPS_INJECTION_DN                  |            |                                  |                                  |     |
| 117                                                                    | 0.36598387 | 1.4766338                        | 0.010080645                      |     |
| 0.017872443                                                            | 1          | 1964                             | "tags=26%, list=14%, signal=30%" |     |
| GSE15330_LYMPHOID_MULTIPOTENT_VS_MEGAKARYOCYTE_ERYTHROID_PROGENITOR_UP |            |                                  |                                  |     |
| GSE15330_LYMPHOID_MULTIPOTENT_VS_MEGAKARYOCYTE_ERYTHROID_PROGENITOR_UP |            |                                  |                                  |     |
| 0.01819752                                                             | 1          | 2355                             | "tags=28%, list=17%, signal=33%" |     |
| GSE46242_CTRL_VS_EGR2_DELETED_TH1_CD4_TCELL_UP                         |            |                                  |                                  |     |
| GSE46242_CTRL_VS_EGR2_DELETED_TH1_CD4_TCELL_UP                         |            |                                  |                                  |     |
| 0.35880777                                                             | 1.4749937  | 0.00409836                       | 0.018191969                      | 137 |
| 1                                                                      | 2102       | "tags=28%, list=15%, signal=33%" |                                  |     |
| GSE17721_LPS_VS_GARDIQUIMOD_6H_BMDC_DN                                 |            |                                  |                                  |     |
| GSE17721_LPS_VS_GARDIQUIMOD_6H_BMDC_DN                                 |            |                                  |                                  |     |
| 0.35589507                                                             | 1.4748696  | 0.004347826                      | 0.018208563                      | 148 |
| 1                                                                      | 1965       | "tags=33%, list=14%, signal=38%" |                                  |     |
| GSE16385_UNTREATED_VS_12H_IFNG_TNF_TREATED_MACROPHAGE_DN               |            |                                  |                                  |     |
| GSE16385_UNTREATED_VS_12H_IFNG_TNF_TREATED_MACROPHAGE_DN               |            |                                  |                                  |     |
| 125                                                                    | 0.36587164 | 1.4745218                        | 0.014830508                      |     |
| 0.01826505                                                             | 1          | 2735                             | "tags=38%, list=19%, signal=46%" |     |
| GSE37605_C57BL6_VS_NOD_FOXP3_FUSION_GFP_TCONV_DN                       |            |                                  |                                  |     |
| GSE37605_C57BL6_VS_NOD_FOXP3_FUSION_GFP_TCONV_DN                       |            |                                  |                                  |     |
| 0.36033913                                                             | 1.4736106  | 0.006369427                      | 0.018473325                      | 136 |
| 1                                                                      | 2270       | "tags=38%, list=16%, signal=45%" |                                  |     |

|                                                                           |                                  |                                  |                                  |             |
|---------------------------------------------------------------------------|----------------------------------|----------------------------------|----------------------------------|-------------|
| GSE18791_UNSTIM_VS_NEWCATSLE_VIRUS_DC_10H_UP                              |                                  |                                  |                                  |             |
| GSE18791_UNSTIM_VS_NEWCATSLE_VIRUS_DC_10H_UP                              |                                  |                                  |                                  | 133         |
| 0.36223662                                                                | 1.4733183                        | 0.004192872                      |                                  | 0.01852239  |
| 1                                                                         | 2591                             | "tags=35%, list=18%, signal=43%" |                                  |             |
| GSE360_CTRL_VS_B_MALAYI_HIGH_DOSE_MAC_DN                                  |                                  |                                  |                                  |             |
| GSE360_CTRL_VS_B_MALAYI_HIGH_DOSE_MAC_DN                                  |                                  |                                  |                                  | 159         |
| 0.34684184                                                                | 1.4732127                        | 0.008333334                      |                                  | 0.018527582 |
| 1                                                                         | 1788                             | "tags=23%, list=13%, signal=26%" |                                  |             |
| GSE17721_LPS_VS_CPG_1H_BMDC_UP                                            |                                  |                                  |                                  |             |
| GSE17721_LPS_VS_CPG_1H_BMDC_UP                                            |                                  |                                  |                                  |             |
| 152                                                                       | 0.35160086                       | 1.4726863                        |                                  | 0.012048192 |
| 0.018637631                                                               | 1                                | 2275                             | "tags=29%, list=16%, signal=34%" |             |
| GSE2770_IL12_VS_IL4_TREATED_ACT_CD4_TCELL_2H_UP                           |                                  |                                  |                                  |             |
| GSE2770_IL12_VS_IL4_TREATED_ACT_CD4_TCELL_2H_UP                           |                                  |                                  |                                  | 100         |
| 0.37682807                                                                | 1.4717438                        | 0.024242423                      |                                  | 0.018833032 |
| 1                                                                         | 1616                             | "tags=24%, list=11%, signal=27%" |                                  |             |
| GSE5542_IFNG_VS_IFNA_AND_IFNG_TREATED_EPITHELIAL_CELLS_6H_UP              |                                  |                                  |                                  |             |
| GSE5542_IFNG_VS_IFNA_AND_IFNG_TREATED_EPITHELIAL_CELLS_6H_UP              |                                  |                                  |                                  |             |
| 144                                                                       | 0.35115516                       | 1.4716948                        |                                  | 0.013422819 |
| 0.018824983                                                               | 1                                | 3038                             | "tags=39%, list=22%, signal=49%" |             |
| GSE7218_IGM_VS_IGG_SIGNAL_THROUGH_ANTIGEN_BCELL_DN                        |                                  |                                  |                                  |             |
| GSE7218_IGM_VS_IGG_SIGNAL_THROUGH_ANTIGEN_BCELL_DN                        |                                  |                                  |                                  | 144         |
| 0.3545311                                                                 | 1.4704123                        | 0.008213553                      |                                  | 0.019096632 |
| 1                                                                         | 1795                             | "tags=28%, list=13%, signal=32%" |                                  |             |
| GSE17721_PAM3CSK4_VS_GADIQUIMOD_16H_BMDC_DN                               |                                  |                                  |                                  |             |
| GSE17721_PAM3CSK4_VS_GADIQUIMOD_16H_BMDC_DN                               |                                  |                                  |                                  | 153         |
| 0.35526425                                                                | 1.4699004                        | 0.007766991                      |                                  | 0.019181903 |
| 1                                                                         | 2011                             | "tags=27%, list=14%, signal=31%" |                                  |             |
| GSE411_UNSTIM_VS_400MIN_IL6_STIM_MACROPHAGE_DN                            |                                  |                                  |                                  |             |
| GSE411_UNSTIM_VS_400MIN_IL6_STIM_MACROPHAGE_DN                            |                                  |                                  |                                  | 133         |
| 0.35936946                                                                | 1.4679258                        | 0.014227643                      |                                  | 0.019610068 |
| 1                                                                         | 2019                             | "tags=31%, list=14%, signal=36%" |                                  |             |
| GSE46606_UNSTIM_VS_CD40L_IL2_IL5_1DAY_STIMULATED_IRF4_KO_BCELL_UP         |                                  |                                  |                                  |             |
| GSE46606_UNSTIM_VS_CD40L_IL2_IL5_1DAY_STIMULATED_IRF4_KO_BCELL_UP         |                                  |                                  |                                  |             |
| 142                                                                       | 0.35256198                       | 1.466178                         | 0.006048387                      |             |
| 0.019998442                                                               | 1                                | 2225                             | "tags=29%, list=16%, signal=34%" |             |
| GSE9006_HEALTHY_VS_TYPE_1_DIABETES_PBMC_AT_DX_UP                          |                                  |                                  |                                  |             |
| GSE9006_HEALTHY_VS_TYPE_1_DIABETES_PBMC_AT_DX_UP                          |                                  |                                  |                                  | 145         |
| 0.35428342                                                                | 1.4649734                        | 0.006036217                      |                                  | 0.020258578 |
| 1                                                                         | 2854                             | "tags=39%, list=20%, signal=48%" |                                  |             |
| GSE360_L_DONOVANI_VS_T_GONDII_DC_DN                                       |                                  |                                  |                                  |             |
| GSE360_L_DONOVANI_VS_T_GONDII_DC_DN                                       |                                  |                                  |                                  | 139         |
| 0.36141226                                                                | 1.4646372                        | 0.00625                          | 0.020315917                      | 1           |
| 2170                                                                      | "tags=27%, list=15%, signal=31%" |                                  |                                  |             |
| GSE6259_DEC205_POS_DC_VS_CD4_TCELL_DN                                     |                                  |                                  |                                  |             |
| GSE6259_DEC205_POS_DC_VS_CD4_TCELL_DN                                     |                                  |                                  |                                  | 151         |
| 0.3530683                                                                 | 1.462541                         | 0.008333334                      | 0.020785274                      | 1           |
| 2004                                                                      | "tags=25%, list=14%, signal=29%" |                                  |                                  |             |
| GSE10240_IL17_VS_IL17_AND_IL22_STIM_PRIMARY_BRONCHIAL_EPITHELIAL_CELLS_UP |                                  |                                  |                                  |             |
| GSE10240_IL17_VS_IL17_AND_IL22_STIM_PRIMARY_BRONCHIAL_EPITHELIAL_CELLS_UP |                                  |                                  |                                  |             |
| 128                                                                       | 0.3618985                        | 1.460562                         | 0.01048218                       |             |
| 0.02122843                                                                | 1                                | 2297                             | "tags=30%, list=16%, signal=36%" |             |
| GSE39152_SPLEEN_CD103_NEG_VS_BRAIN_CD103_POS_MEMORY_CD8_TCELL_UP          |                                  |                                  |                                  |             |
| GSE39152_SPLEEN_CD103_NEG_VS_BRAIN_CD103_POS_MEMORY_CD8_TCELL_UP          |                                  |                                  |                                  |             |

|                                                                      |                                  |                                  |                                  |             |     |
|----------------------------------------------------------------------|----------------------------------|----------------------------------|----------------------------------|-------------|-----|
| 0.021285959                                                          | 164                              | 0.35126683                       | 1.4603083                        | 0.004201681 |     |
| GSE45365_CD8A_DC_VS_CD11B_DC_IFNAR_KO_MCMV_INFECTI                   | 1                                | 2185                             | "tags=27%, list=15%, signal=32%" |             |     |
| GSE45365_CD8A_DC_VS_CD11B_DC_IFNAR_KO_MCMV_INFECTI                   |                                  |                                  |                                  |             |     |
| 120                                                                  | 0.3593219                        | 1.4600825                        | 0.011286682                      |             |     |
| 0.021328265                                                          | 1                                | 2260                             | "tags=28%, list=16%, signal=32%" |             |     |
| GSE26030_UNSTIM_VS_RESTIM_TH1_DAY15_POST_POLARIZATI                  |                                  |                                  |                                  |             |     |
| GSE26030_UNSTIM_VS_RESTIM_TH1_DAY15_POST_POLARIZATI                  |                                  |                                  |                                  |             |     |
| 152                                                                  | 0.35053137                       | 1.4599504                        | 0.00617284                       |             |     |
| 0.021350738                                                          | 1                                | 2107                             | "tags=30%, list=15%, signal=35%" |             |     |
| GSE16385_MONOCYTE_VS_12H_IL4_TREATED_MACROPHAGE_DN                   |                                  |                                  |                                  |             |     |
| GSE16385_MONOCYTE_VS_12H_IL4_TREATED_MACROPHAGE_DN                   |                                  |                                  |                                  |             | 152 |
| 0.34990954                                                           | 1.4596828                        | 0.008492569                      | 0.021404628                      |             |     |
| 1                                                                    | 2472                             | "tags=33%, list=18%, signal=39%" |                                  |             |     |
| GSE17721_CTRL_VS_LPS_2H_BMDC_UP                                      |                                  |                                  |                                  |             |     |
| GSE17721_CTRL_VS_LPS_2H_BMDC_UP                                      |                                  |                                  |                                  |             |     |
| 140                                                                  | 0.35287187                       | 1.4596177                        | 0.01026694                       |             |     |
| 0.02140731                                                           | 1                                | 2006                             | "tags=23%, list=14%, signal=26%" |             |     |
| GSE3982_MAST_CELL_VS_CENT_MEMORY_CD4_TCELL_UP                        |                                  |                                  |                                  |             |     |
| GSE3982_MAST_CELL_VS_CENT_MEMORY_CD4_TCELL_UP                        |                                  |                                  |                                  |             | 151 |
| 0.35222676                                                           | 1.4592925                        | 0.006369427                      | 0.021470051                      |             |     |
| 1                                                                    | 2422                             | "tags=37%, list=17%, signal=44%" |                                  |             |     |
| GSE17721_POLYIC_VS_PAM3CSK4_0.5H_BMDC_UP                             |                                  |                                  |                                  |             |     |
| GSE17721_POLYIC_VS_PAM3CSK4_0.5H_BMDC_UP                             |                                  |                                  |                                  |             | 159 |
| 0.3445719                                                            | 1.4582264                        | 0                                | 0.021717666                      |             | 1   |
| 1795                                                                 | "tags=17%, list=13%, signal=19%" |                                  |                                  |             |     |
| GSE15733_BM_VS_SPLEEN_MEMORY_CD4_TCELL_UP                            |                                  |                                  |                                  |             |     |
| GSE15733_BM_VS_SPLEEN_MEMORY_CD4_TCELL_UP                            |                                  |                                  |                                  |             | 149 |
| 0.35350916                                                           | 1.4575337                        | 0.008264462                      | 0.021884497                      |             |     |
| 1                                                                    | 1277                             | "tags=17%, list=9%, signal=19%"  |                                  |             |     |
| GSE43955_TH0_VS_TGFB_IL6_TH17_ACT_CD4_TCELL_10H_DN                   |                                  |                                  |                                  |             |     |
| GSE43955_TH0_VS_TGFB_IL6_TH17_ACT_CD4_TCELL_10H_DN                   |                                  |                                  |                                  |             | 162 |
| 0.34255785                                                           | 1.4568901                        | 0.012448133                      | 0.022016317                      |             |     |
| 1                                                                    | 1615                             | "tags=17%, list=11%, signal=19%" |                                  |             |     |
| GSE21670_TGFB_VS_TGFB_AND_IL6_TREATED_CD4_TCELL_UP                   |                                  |                                  |                                  |             |     |
| GSE21670_TGFB_VS_TGFB_AND_IL6_TREATED_CD4_TCELL_UP                   |                                  |                                  |                                  |             | 144 |
| 0.3512145                                                            | 1.4561107                        | 0.012875536                      | 0.022233585                      |             |     |
| 1                                                                    | 1522                             | "tags=24%, list=11%, signal=27%" |                                  |             |     |
| GSE2770_TGFB_AND_IL4_VS_TGFB_AND_IL12_TREATED_ACT_CD4_TCELL_2H_DN    |                                  |                                  |                                  |             |     |
| GSE2770_TGFB_AND_IL4_VS_TGFB_AND_IL12_TREATED_ACT_CD4_TCELL_2H_DN    |                                  |                                  |                                  |             |     |
| 130                                                                  | 0.3601114                        | 1.455808                         | 0.013071896                      |             |     |
| 0.022289386                                                          | 1                                | 2560                             | "tags=35%, list=18%, signal=43%" |             |     |
| GSE3982_EOSINOPHIL_VS_EFF_MEMORY_CD4_TCELL_DN                        |                                  |                                  |                                  |             |     |
| GSE3982_EOSINOPHIL_VS_EFF_MEMORY_CD4_TCELL_DN                        |                                  |                                  |                                  |             | 140 |
| 0.35015765                                                           | 1.4557377                        | 0.008733625                      | 0.022283562                      |             |     |
| 1                                                                    | 1454                             | "tags=19%, list=10%, signal=20%" |                                  |             |     |
| GSE2585_THYMIC_DC_VS_THYMIC_MACROPHAGE_DN                            |                                  |                                  |                                  |             |     |
| GSE2585_THYMIC_DC_VS_THYMIC_MACROPHAGE_DN                            |                                  |                                  |                                  |             | 129 |
| 0.36084664                                                           | 1.4556785                        | 0.012422361                      | 0.022277612                      |             |     |
| 1                                                                    | 1090                             | "tags=19%, list=8%, signal=20%"  |                                  |             |     |
| GSE4748_CYANOBACTERIUM_LPSLIKE_VS_LPS_AND_CYANOBACTERIUM_LPSLIKE_STI |                                  |                                  |                                  |             |     |
| M_DC_3H_DN                                                           |                                  |                                  |                                  |             |     |
| GSE4748_CYANOBACTERIUM_LPSLIKE_VS_LPS_AND_CYANOBACTERIUM_LPSLIKE_STI |                                  |                                  |                                  |             |     |
| M_DC_3H_DN                                                           |                                  | 121                              | 0.36017346                       | 1.4542108   |     |
| 0.017738359                                                          | 0.022655513                      | 1                                | 1774                             | "tags=20%,  |     |

```

list=13%, signal=22%"
GSE13484_12H_VS_3H_YF17D_VACCINE_STIM_PBMC_UP
GSE13484_12H_VS_3H_YF17D_VACCINE_STIM_PBMC_UP 135
0.3521266 1.4534103 0.012738854 0.02283608
1 2611 "tags=38%, list=19%, signal=46%"
GSE6259_FLT3L_INDUCED_33D1_POS_DC_VS_CD8_TCELL_UP
GSE6259_FLT3L_INDUCED_33D1_POS_DC_VS_CD8_TCELL_UP 115
0.36653754 1.4531695 0.014644352 0.022872834
1 1378 "tags=22%, list=10%, signal=24%"
GSE23398_WT_VS_IL2_KO_CD4_TCELL_SCURFY_MOUSE_UP
GSE23398_WT_VS_IL2_KO_CD4_TCELL_SCURFY_MOUSE_UP 143
0.3538237 1.4529009 0.010729614 0.022935824
1 2286 "tags=31%, list=16%, signal=36%"
GSE3982_DC_VS_NEUTROPHIL_UP GSE3982_DC_VS_NEUTROPHIL_UP
153 0.3471607 1.4525373 0.004366812
0.023005601 1 2200 "tags=29%, list=16%, signal=34%"
GSE27786_ERYTHROBLAST_VS_NEUTROPHIL_UP
GSE27786_ERYTHROBLAST_VS_NEUTROPHIL_UP 137 0.356136
1.4523054 0.016771488 0.023051716 1
2677 "tags=29%, list=19%, signal=36%"
GSE43863_TH1_VS_LY6C_INT_CXCR5POS_MEMORY_CD4_TCELL_UP
GSE43863_TH1_VS_LY6C_INT_CXCR5POS_MEMORY_CD4_TCELL_UP
141 0.3528322 1.4521438 0.010683761
0.02307356 1 2492 "tags=31%, list=18%, signal=38%"
GSE35825_IFNA_VS_IFNG_STIM_MACROPHAGE_DN
GSE35825_IFNA_VS_IFNG_STIM_MACROPHAGE_DN 143
0.35346794 1.4519889 0.008810572 0.02308571
1 1889 "tags=26%, list=13%, signal=30%"
GSE17322_CD103_POS_VS_CD11B_HIGH_LUNG_DC_UP
GSE17322_CD103_POS_VS_CD11B_HIGH_LUNG_DC_UP 127
0.35717598 1.4519657 0.010845987 0.023075342
1 2428 "tags=38%, list=17%, signal=45%"
GSE17721_CTRL_VS_CPG_24H_BMDC_DN GSE17721_CTRL_VS_CPG_24H_BMDC_DN
155 0.34585392 1.4518347 0.00409836
0.023089282 1 1828 "tags=23%, list=13%, signal=26%"
GSE7219_UNSTIM_VS_LPS_AND_ANTI_CD40_STIM_NIK_NFKB2_KO_DC_UP
GSE7219_UNSTIM_VS_LPS_AND_ANTI_CD40_STIM_NIK_NFKB2_KO_DC_UP
150 0.34952685 1.4511362 0.015283843
0.023246743 1 2311 "tags=39%, list=16%, signal=47%"
GSE6269_FLU_VS_STAPH_AUREUS_INF_PBMC_DN
GSE6269_FLU_VS_STAPH_AUREUS_INF_PBMC_DN 124
0.35862318 1.450861 0.008333334 0.023311978 1
2083 "tags=33%, list=15%, signal=38%"
GSE45365_HEALTHY_VS_MCMV_INFECTION_CD8A_DC_IFNAR_KO_UP
GSE45365_HEALTHY_VS_MCMV_INFECTION_CD8A_DC_IFNAR_KO_UP
132 0.3617188 1.4501892 0.012448133
0.023468167 1 1882 "tags=26%, list=13%, signal=29%"
GSE25123_CTRL_VS_IL4_AND_ROSIGLITAZONE_STIM_MACROPHAGE_UP
GSE25123_CTRL_VS_IL4_AND_ROSIGLITAZONE_STIM_MACROPHAGE_UP
156 0.34882382 1.4500169 0.010416667
0.02350013 1 2082 "tags=30%, list=15%, signal=35%"
GSE11961_GERMINAL_CENTER_BCELL_DAY7_VS_PLASMA_CELL_DAY7_UP
GSE11961_GERMINAL_CENTER_BCELL_DAY7_VS_PLASMA_CELL_DAY7_UP
157 0.3494847 1.4499125 0.006423983

```



0.023508644 1 1741 "tags=22%, list=12%, signal=24%"  
GSE9946\_IMMATURE\_VS\_PROSTAGLANDINE2\_TREATED\_MATURE\_DC\_DN  
GSE9946\_IMMATURE\_VS\_PROSTAGLANDINE2\_TREATED\_MATURE\_DC\_DN  
117 0.36919984 1.4494753 0.017857144  
0.023606358 1 1964 "tags=21%, list=14%, signal=24%"  
GSE4984\_UNTREATED\_VS\_GALECTIN1\_TREATED\_DC\_UP  
GSE4984\_UNTREATED\_VS\_GALECTIN1\_TREATED\_DC\_UP 126  
0.35819548 1.4492921 0.004048583 0.023627292  
1 1501 "tags=21%, list=11%, signal=23%"  
GSE17721\_POLYIC\_VS\_CPG\_6H\_BMDC\_DN GSE17721\_POLYIC\_VS\_CPG\_6H\_BMDC\_DN  
148 0.35096148 1.4491891 0.010752688  
0.023634903 1 1702 "tags=26%, list=12%, signal=29%"  
GSE42021\_TREG\_VS\_TCONV\_PLN\_DN GSE42021\_TREG\_VS\_TCONV\_PLN\_DN  
153 0.34922633 1.4487231 0.008888889  
0.023748675 1 1679 "tags=22%, list=12%, signal=25%"  
GSE21033\_1H\_VS\_24H\_POLYIC\_STIM\_DC\_DN  
GSE21033\_1H\_VS\_24H\_POLYIC\_STIM\_DC\_DN 121  
0.36183408 1.4482374 0.023255814 0.023861941  
1 2291 "tags=36%, list=16%, signal=42%"  
GSE22601\_DOUBLE\_NEGATIVE\_VS\_CD4\_SINGLE\_POSITIVE\_THYMOCYTE\_DN  
GSE22601\_DOUBLE\_NEGATIVE\_VS\_CD4\_SINGLE\_POSITIVE\_THYMOCYTE\_DN  
153 0.351722 1.4475894 0.012269938  
0.024041504 1 1976 "tags=29%, list=14%, signal=33%"  
GSE27786\_CD8\_TCELL\_VS\_MONO\_MAC\_DN GSE27786\_CD8\_TCELL\_VS\_MONO\_MAC\_DN  
136 0.35119826 1.4470317 0.006507592  
0.024187155 1 1160 "tags=20%, list=8%, signal=21%"  
GSE22935\_WT\_VS\_MYD88\_KO\_MACROPHAGE\_12H\_MBOVIS\_BCG\_STIM\_DN  
GSE22935\_WT\_VS\_MYD88\_KO\_MACROPHAGE\_12H\_MBOVIS\_BCG\_STIM\_DN  
155 0.34733018 1.4467771 0.014830508  
0.024236524 1 1949 "tags=26%, list=14%, signal=30%"  
GSE1460\_INTRATHYMIC\_T\_PROGENITOR\_VS\_THYMIC\_STROMAL\_CELL\_UP  
GSE1460\_INTRATHYMIC\_T\_PROGENITOR\_VS\_THYMIC\_STROMAL\_CELL\_UP  
145 0.35103208 1.4464875 0.015118791  
0.024288666 1 1725 "tags=26%, list=12%, signal=30%"  
GSE37605\_TREG\_VS\_TCONV\_C57BL6\_FOXP3\_IRES\_GFP\_DN  
GSE37605\_TREG\_VS\_TCONV\_C57BL6\_FOXP3\_IRES\_GFP\_DN 119  
0.359218 1.4463407 0.028761063 0.024304284 1  
2259 "tags=34%, list=16%, signal=41%"  
GSE32986\_CURDLAN\_LOWDOSE\_VS\_GMCSF\_AND\_CURDLAN\_LOWDOSE\_STIM\_DC\_UP  
GSE32986\_CURDLAN\_LOWDOSE\_VS\_GMCSF\_AND\_CURDLAN\_LOWDOSE\_STIM\_DC\_UP  
134 0.3538945 1.4453471 0.00408998  
0.024596553 1 2191 "tags=33%, list=16%, signal=39%"  
GSE10240\_CTRL\_VS\_IL17\_STIM\_PRIMARY\_BRONCHIAL\_EPITHELIAL\_CELLS\_DN  
GSE10240\_CTRL\_VS\_IL17\_STIM\_PRIMARY\_BRONCHIAL\_EPITHELIAL\_CELLS\_DN  
155 0.34317774 1.4442364 0.010504202  
0.024911316 1 2926 "tags=34%, list=21%, signal=43%"  
GSE38304\_MYC\_NEG\_VS\_POS\_GC\_BCELL\_DN  
GSE38304\_MYC\_NEG\_VS\_POS\_GC\_BCELL\_DN 159  
0.34642395 1.4441979 0.008130081 0.024904488  
1 1806 "tags=32%, list=13%, signal=36%"  
GSE6259\_FLT3L\_INDUCED\_VS\_WT\_SPLENIC\_DC\_33D1\_POS\_DN  
GSE6259\_FLT3L\_INDUCED\_VS\_WT\_SPLENIC\_DC\_33D1\_POS\_DN 124  
0.35763645 1.4437176 0.006329114 0.025027473  
1 1603 "tags=17%, list=11%, signal=19%"

GSE22229\_RENAL\_TRANSPLANT\_IMMUNOSUPP\_THERAPY\_VS\_HEALTHY\_PBMC\_UP  
GSE22229\_RENAL\_TRANSPLANT\_IMMUNOSUPP\_THERAPY\_VS\_HEALTHY\_PBMC\_UP  
151 0.34648806 1.4432821 0.010752688  
0.025122358 1 1782 "tags=26%, list=13%, signal=29%"  
GSE41867\_LCMV\_ARMSTRONG\_VS\_CLONE13\_DAY8\_EFFECTOR\_CD8\_TCELL\_DN  
GSE41867\_LCMV\_ARMSTRONG\_VS\_CLONE13\_DAY8\_EFFECTOR\_CD8\_TCELL\_DN  
139 0.35215405 1.443237 0.022869023  
0.0251105 1 1640 "tags=26%, list=12%, signal=29%"  
GSE43955\_1H\_VS\_42H\_ACT\_CD4\_TCELL\_WITH\_TGFB\_IL6\_UP  
GSE43955\_1H\_VS\_42H\_ACT\_CD4\_TCELL\_WITH\_TGFB\_IL6\_UP 157  
0.34498182 1.4430797 0.002188184 0.025126344  
1 1461 "tags=25%, list=10%, signal=28%"  
GSE11924\_TFH\_VS\_TH1\_CD4\_TCELL\_DN GSE11924\_TFH\_VS\_TH1\_CD4\_TCELL\_DN  
141 0.3519067 1.4405198 0.014403292  
0.025857134 1 2253 "tags=26%, list=16%, signal=30%"  
GSE17721\_4\_VS\_24H\_GARDIQUIMOD\_BMDC\_DN  
GSE17721\_4\_VS\_24H\_GARDIQUIMOD\_BMDC\_DN 148  
0.35017365 1.4398848 0.004366812 0.026009353  
1 2092 "tags=30%, list=15%, signal=35%"  
GSE12392\_CD8A\_POS\_VS\_NEG\_SPLEEN\_IFNB\_KO\_DC\_DN  
GSE12392\_CD8A\_POS\_VS\_NEG\_SPLEEN\_IFNB\_KO\_DC\_DN 155  
0.3487442 1.439651 0.013574661 0.02604623 1  
1898 "tags=30%, list=13%, signal=34%"  
GSE13493\_DP\_VS\_CD8POS\_THYMOCYTE\_DN  
GSE13493\_DP\_VS\_CD8POS\_THYMOCYTE\_DN 154  
0.34110498 1.43892 0.010504202 0.026222639 1  
2361 "tags=32%, list=17%, signal=39%"  
GSE29618\_BCELL\_VS\_PDC\_DAY7\_FLU\_VACCINE\_DN  
GSE29618\_BCELL\_VS\_PDC\_DAY7\_FLU\_VACCINE\_DN 161  
0.34061545 1.4388523 0.01010101 0.026221404  
1 1307 "tags=20%, list=9%, signal=22%"  
GSE25088\_CTRL\_VS\_ROSIGLITAZONE\_STIM\_STAT6\_KO\_MACROPHAGE\_DN  
GSE25088\_CTRL\_VS\_ROSIGLITAZONE\_STIM\_STAT6\_KO\_MACROPHAGE\_DN  
142 0.34655887 1.4387652 0.012345679  
0.02622973 1 2841 "tags=42%, list=20%, signal=52%"  
GSE46468\_LUNG\_INNATE\_LYMPHOID\_CELL\_VS\_SPLEEN\_CD4\_TCELL\_DN  
GSE46468\_LUNG\_INNATE\_LYMPHOID\_CELL\_VS\_SPLEEN\_CD4\_TCELL\_DN  
145 0.34805444 1.4382179 0.012422361  
0.026387926 1 2539 "tags=34%, list=18%, signal=42%"  
GSE27291\_0H\_VS\_7D\_STIM\_GAMMADELTA\_TCELL\_DN  
GSE27291\_0H\_VS\_7D\_STIM\_GAMMADELTA\_TCELL\_DN 126  
0.35525885 1.4372115 0.008264462 0.026697505  
1 1616 "tags=21%, list=11%, signal=24%"  
GSE45365\_NK\_CELL\_VS\_CD8\_TCELL\_DN GSE45365\_NK\_CELL\_VS\_CD8\_TCELL\_DN  
93 0.36929286 1.4369292 0.02296451  
0.026755486 1 1962 "tags=24%, list=14%, signal=27%"  
GSE22611\_UNSTIM\_VS\_2H\_MDP\_STIM\_MUTANT\_NOD2\_TRANSDUCED\_HEK293T\_CELL\_U  
P  
GSE22611\_UNSTIM\_VS\_2H\_MDP\_STIM\_MUTANT\_NOD2\_TRANSDUCED\_HEK293T\_CELL\_U  
P 142 0.35020563 1.4365904  
0.008639309 0.02682378 1 1749 "tags=25%,  
list=12%, signal=29%"  
GSE11864\_UNTREATED\_VS\_CSF1\_IFNG\_IN\_MAC\_DN  
GSE11864\_UNTREATED\_VS\_CSF1\_IFNG\_IN\_MAC\_DN 141

0.35374302 1.436522 0.014112903 0.026819281 1  
2572 "tags=37%, list=18%, signal=45%"  
GSE7219\_WT\_VS\_NIK\_NFKB2\_KO\_DC\_DN GSE7219\_WT\_VS\_NIK\_NFKB2\_KO\_DC\_DN  
138 0.35222447 1.4360505 0.016528925  
0.02696305 1 2431 "tags=36%, list=17%, signal=42%"  
GSE37532\_TREG\_VS\_TCONV\_CD4\_TCELL\_FROM\_LN\_UP  
GSE37532\_TREG\_VS\_TCONV\_CD4\_TCELL\_FROM\_LN\_UP 144  
0.3427324 1.4352227 0.00877193 0.027189426  
1 1480 "tags=19%, list=10%, signal=22%"  
GSE369\_PRE\_VS\_POST\_IL6\_INJECTION\_IFNG\_KO\_LIVER\_UP  
GSE369\_PRE\_VS\_POST\_IL6\_INJECTION\_IFNG\_KO\_LIVER\_UP 140  
0.34828407 1.4348234 0.018789144 0.027283493  
1 2617 "tags=41%, list=19%, signal=49%"  
GSE46606\_IRF4\_KO\_VS\_WT\_CD40L\_IL2\_IL5\_3DAY\_STIMULATED\_BCELL\_DN  
GSE46606\_IRF4\_KO\_VS\_WT\_CD40L\_IL2\_IL5\_3DAY\_STIMULATED\_BCELL\_DN  
118 0.35844505 1.4345894 0.01735358  
0.027335158 1 2139 "tags=29%, list=15%, signal=34%"  
GSE10240\_IL22\_VS\_IL17\_STIM\_PRIMARY\_BRONCHIAL\_EPITHELIAL\_CELLS\_DN  
GSE10240\_IL22\_VS\_IL17\_STIM\_PRIMARY\_BRONCHIAL\_EPITHELIAL\_CELLS\_DN  
131 0.3477207 1.4341408 0.010869565  
0.027463757 1 2182 "tags=29%, list=15%, signal=34%"  
GSE27670\_BLIMP1\_VS\_LMP1\_TRANSDUCED\_GC\_BCELL\_DN  
GSE27670\_BLIMP1\_VS\_LMP1\_TRANSDUCED\_GC\_BCELL\_DN 155  
0.34614044 1.433827 0.007968128 0.027567806 1  
1692 "tags=25%, list=12%, signal=28%"  
GSE7768\_OVA\_ALONE\_VS\_OVA\_WITH\_LPS\_IMMUNIZED\_MOUSE\_WHOLE\_SPLEEN\_6H\_UP  
  
GSE7768\_OVA\_ALONE\_VS\_OVA\_WITH\_LPS\_IMMUNIZED\_MOUSE\_WHOLE\_SPLEEN\_6H\_UP  
124 0.3517274 1.4332644  
0.026915114 0.0276972 1 1835 "tags=24%,  
list=13%, signal=28%"  
GSE8868\_SPLEEN\_VS\_INTESTINE\_CD11B\_POS\_CD11C\_NEG\_DC\_UP  
GSE8868\_SPLEEN\_VS\_INTESTINE\_CD11B\_POS\_CD11C\_NEG\_DC\_UP  
128 0.34821796 1.4326161 0.01923077  
0.027886381 1 1804 "tags=23%, list=13%, signal=27%"  
GSE8621\_UNSTIM\_VS\_LPS\_STIM\_MACROPHAGE\_DN  
GSE8621\_UNSTIM\_VS\_LPS\_STIM\_MACROPHAGE\_DN 140  
0.3497448 1.4315584 0.004415011 0.028208062  
1 2291 "tags=34%, list=16%, signal=40%"  
GSE1448\_CTRL\_VS\_ANTI\_VBETA5\_DP\_THYMOCYTE\_UP  
GSE1448\_CTRL\_VS\_ANTI\_VBETA5\_DP\_THYMOCYTE\_UP 150  
0.3473443 1.4311996 0.014056225 0.028299833  
1 2166 "tags=29%, list=15%, signal=34%"  
GSE13484\_3H\_UNSTIM\_VS\_YF17D\_VACCINE\_STIM\_PBMC\_UP  
GSE13484\_3H\_UNSTIM\_VS\_YF17D\_VACCINE\_STIM\_PBMC\_UP 147  
0.34751022 1.4308907 0.00617284 0.028370764  
1 2296 "tags=33%, list=16%, signal=39%"  
GSE19888\_CTRL\_VS\_T\_CELL\_MEMBRANES\_ACT\_MAST\_CELL\_UP  
GSE19888\_CTRL\_VS\_T\_CELL\_MEMBRANES\_ACT\_MAST\_CELL\_UP 143  
0.34790266 1.4308584 0.010615711 0.028365018  
1 2836 "tags=38%, list=20%, signal=47%"  
GSE12366\_PLASMA\_CELL\_VS\_MEMORY\_BCELL\_DN  
GSE12366\_PLASMA\_CELL\_VS\_MEMORY\_BCELL\_DN 134  
0.3461858 1.4303765 0.011389522 0.028473359

1 2380 "tags=35%, list=17%, signal=42%"  
GSE5542\_IFNG\_VS\_IFNA\_AND\_IFNG\_TREATED\_EPITHELIAL\_CELLS\_24H\_UP  
GSE5542\_IFNG\_VS\_IFNA\_AND\_IFNG\_TREATED\_EPITHELIAL\_CELLS\_24H\_UP  
138 0.35056928 1.4299575 0.006237006  
0.02858228 1 2130 "tags=29%, list=15%, signal=34%"  
GSE20198\_UNTREATED\_VS\_IFNA\_TREATED\_ACT\_CD4\_TCELL\_DN  
GSE20198\_UNTREATED\_VS\_IFNA\_TREATED\_ACT\_CD4\_TCELL\_DN  
138 0.34430844 1.4297241 0.002118644  
0.028646423 1 2571 "tags=34%, list=18%, signal=41%"  
GSE2770\_IL12\_AND\_TGFB\_ACT\_VS\_ACT\_CD4\_TCELL\_2H\_UP  
GSE2770\_IL12\_AND\_TGFB\_ACT\_VS\_ACT\_CD4\_TCELL\_2H\_UP 136  
0.35025558 1.4291006 0.006396588 0.028834132  
1 2106 "tags=26%, list=15%, signal=30%"  
GSE9650\_NAIVE\_VS\_EXHAUSTED\_CD8\_TCELL\_UP  
GSE9650\_NAIVE\_VS\_EXHAUSTED\_CD8\_TCELL\_UP 160  
0.34292242 1.4290776 0.013422819 0.02881589  
1 1762 "tags=28%, list=12%, signal=32%"  
GSE360\_CTRL\_VS\_L\_DONOVANI\_DC\_UP GSE360\_CTRL\_VS\_L\_DONOVANI\_DC\_UP  
144 0.34480733 1.4282838 0.016736401  
0.029078625 1 2696 "tags=35%, list=19%, signal=42%"  
GSE25088\_CTRL\_VS\_ROSIGLITAZONE\_STIM\_MACROPHAGE\_DN  
GSE25088\_CTRL\_VS\_ROSIGLITAZONE\_STIM\_MACROPHAGE\_DN 105  
0.3652165 1.4281843 0.025210084 0.029096639  
1 1857 "tags=20%, list=13%, signal=23%"  
GSE25088\_ROSIGLITAZONE\_VS\_IL4\_AND\_ROSIGLITAZONE\_STIM\_STAT6\_KO\_MACROP  
HAGE\_DAY10\_DN  
GSE25088\_ROSIGLITAZONE\_VS\_IL4\_AND\_ROSIGLITAZONE\_STIM\_STAT6\_KO\_MACROP  
HAGE\_DAY10\_DN 136 0.34466854 1.4276167  
0.019027485 0.029236242 1 2569 "tags=38%,  
list=18%, signal=46%"  
GSE21063\_WT\_VS\_NFATC1\_KO\_3H\_ANTI\_IGM\_STIM\_BCELL\_DN  
GSE21063\_WT\_VS\_NFATC1\_KO\_3H\_ANTI\_IGM\_STIM\_BCELL\_DN 143  
0.3439998 1.4274976 0.015184382 0.029255103  
1 1839 "tags=27%, list=13%, signal=30%"  
GSE7596\_AKT\_TRANSD\_VS\_CTRL\_CD4\_TCONV\_WITH\_TGFB\_UP  
GSE7596\_AKT\_TRANSD\_VS\_CTRL\_CD4\_TCONV\_WITH\_TGFB\_UP 125  
0.35247964 1.4274412 0.015384615 0.029254248  
1 1681 "tags=28%, list=12%, signal=32%"  
GSE9006\_TYPE\_1\_DIABETES\_AT\_DX\_VS\_4MONTH\_POST\_DX\_PPMC\_UP  
GSE9006\_TYPE\_1\_DIABETES\_AT\_DX\_VS\_4MONTH\_POST\_DX\_PPMC\_UP  
151 0.3464713 1.4270977 0.008510638  
0.029356264 1 1966 "tags=32%, list=14%, signal=37%"  
GSE3920\_UNTREATED\_VS\_IFNB\_TREATED\_ENDOTHELIAL\_CELL\_UP  
GSE3920\_UNTREATED\_VS\_IFNB\_TREATED\_ENDOTHELIAL\_CELL\_UP  
135 0.34750852 1.4266887 0.00990099  
0.02946481 1 2293 "tags=30%, list=16%, signal=35%"  
GSE3982\_NEUTROPHIL\_VS\_EFF\_MEMORY\_CD4\_TCELL\_UP  
GSE3982\_NEUTROPHIL\_VS\_EFF\_MEMORY\_CD4\_TCELL\_UP 141  
0.34384272 1.4266574 0.013972056 0.029455414  
1 2157 "tags=28%, list=15%, signal=32%"  
GSE2405\_HEAT\_KILLED\_LYSATE\_VS\_LIVE\_A\_PHAGOCYTOPHILUM\_STIM\_NEUTROPHIL  
\_9H\_DN  
GSE2405\_HEAT\_KILLED\_LYSATE\_VS\_LIVE\_A\_PHAGOCYTOPHILUM\_STIM\_NEUTROPHIL  
\_9H\_DN 151 0.34347123 1.4265954

|                                                                   |            |             |           |                                     |
|-------------------------------------------------------------------|------------|-------------|-----------|-------------------------------------|
| 0.001984127                                                       | 0.02945265 | 1           | 1742      | "tags=28%,<br>list=12%, signal=32%" |
| GSE27859_CD11C_INT_F480_HI_MACROPHAGE_VS_CD11C_ING_F480_INT_DC_UP |            |             |           |                                     |
| GSE27859_CD11C_INT_F480_HI_MACROPHAGE_VS_CD11C_ING_F480_INT_DC_UP | 134        | 0.34979874  | 1.4264842 | 0.014675053                         |
| 0.029468307                                                       | 1          | 2550        |           | "tags=34%, list=18%, signal=41%"    |
| GSE17721_CTRL_VS_GARDIQUIMOD_0.5H_BMDC_DN                         |            |             |           |                                     |
| GSE17721_CTRL_VS_GARDIQUIMOD_0.5H_BMDC_DN                         |            |             | 147       |                                     |
| 0.34543496                                                        | 1.4260037  | 0.012578616 |           | 0.029604949                         |
| 1                                                                 | 1677       |             |           | "tags=24%, list=12%, signal=27%"    |
| GSE41867_NAIVE_VS_DAY6_LCMV_EFFECTOR_CD8_TCELL_UP                 |            |             |           |                                     |
| GSE41867_NAIVE_VS_DAY6_LCMV_EFFECTOR_CD8_TCELL_UP                 |            |             | 142       |                                     |
| 0.34406906                                                        | 1.4258446  | 0.016771488 |           | 0.029645452                         |
| 1                                                                 | 1949       |             |           | "tags=30%, list=14%, signal=35%"    |
| GSE20715_0H_VS_6H_OZONE_TLR4_KO_LUNG_UP                           |            |             |           |                                     |
| GSE20715_0H_VS_6H_OZONE_TLR4_KO_LUNG_UP                           |            |             | 156       |                                     |
| 0.3414325                                                         | 1.4245924  | 0.008298756 |           | 0.030035637                         |
| 1                                                                 | 1917       |             |           | "tags=23%, list=14%, signal=26%"    |
| GSE3720_UNSTIM_VS_LPS_STIM_VD2_GAMMADELTA_TCELL_UP                |            |             |           |                                     |
| GSE3720_UNSTIM_VS_LPS_STIM_VD2_GAMMADELTA_TCELL_UP                |            |             | 120       |                                     |
| 0.35836494                                                        | 1.4240446  | 0.021153847 |           | 0.030198097                         |
| 1                                                                 | 2695       |             |           | "tags=41%, list=19%, signal=50%"    |
| GSE41867_NAIVE_VS_DAY8_LCMV_CLONE13_EFFECTOR_CD8_TCELL_UP         |            |             |           |                                     |
| GSE41867_NAIVE_VS_DAY8_LCMV_CLONE13_EFFECTOR_CD8_TCELL_UP         | 147        | 0.34182072  | 1.4240342 | 0.010893246                         |
| 0.030179001                                                       | 1          | 1140        |           | "tags=20%, list=8%, signal=21%"     |
| GSE2770_TGFB_AND_IL4_VS_IL12_TREATED_ACT_CD4_TCELL_6H_DN          |            |             |           |                                     |
| GSE2770_TGFB_AND_IL4_VS_IL12_TREATED_ACT_CD4_TCELL_6H_DN          | 128        | 0.3448729   | 1.4237615 | 0.006369427                         |
| 0.030248575                                                       | 1          | 2371        |           | "tags=33%, list=17%, signal=39%"    |
| GSE27786_LSK_VS_CD8_TCELL_UP                                      |            |             |           |                                     |
| GSE27786_LSK_VS_CD8_TCELL_UP                                      | 136        | 0.35065103  | 1.4235804 | 0.010775862                         |
| 0.030292109                                                       | 1          | 1646        |           | "tags=24%, list=12%, signal=26%"    |
| GSE17721_LPS_VS_CPG_16H_BMDC_UP                                   |            |             |           |                                     |
| GSE17721_LPS_VS_CPG_16H_BMDC_UP                                   | 148        | 0.34472454  | 1.4229622 | 0.009861933                         |
| 0.030473195                                                       | 1          | 1313        |           | "tags=20%, list=9%, signal=22%"     |
| GSE20715_0H_VS_6H_OZONE_LUNG_UP                                   |            |             |           |                                     |
| GSE20715_0H_VS_6H_OZONE_LUNG_UP                                   | 154        | 0.33975503  | 1.4229286 | 0.012396694                         |
| 0.030463923                                                       | 1          | 1992        |           | "tags=25%, list=14%, signal=28%"    |
| GSE3039_ALPHAALPHA_CD8_TCELL_VS_B2_BCELL_UP                       |            |             |           |                                     |
| GSE3039_ALPHAALPHA_CD8_TCELL_VS_B2_BCELL_UP                       |            |             | 145       |                                     |
| 0.34259424                                                        | 1.4224343  | 0.012658228 |           | 0.030636558                         |
| 1                                                                 | 1725       |             |           | "tags=26%, list=12%, signal=29%"    |
| GSE18893_TCONV_VS_TREG_24H_CULTURE_DN                             |            |             |           |                                     |
| GSE18893_TCONV_VS_TREG_24H_CULTURE_DN                             |            |             | 145       |                                     |
| 0.34222096                                                        | 1.4220245  | 0.016460905 |           | 0.030766591                         |
| 1                                                                 | 1082       |             |           | "tags=19%, list=8%, signal=21%"     |
| GSE25088_IL4_VS_IL4_AND_ROSIGLITAZONE_STIM_MACROPHAGE_DAY10_UP    |            |             |           |                                     |
| GSE25088_IL4_VS_IL4_AND_ROSIGLITAZONE_STIM_MACROPHAGE_DAY10_UP    | 142        | 0.3452639   | 1.4211321 | 0.024742268                         |
| 0.031027587                                                       | 1          | 2172        |           | "tags=29%, list=15%, signal=34%"    |
| GSE21033_CTRL_VS_POLYIC_STIM_DC_12H_UP                            |            |             |           |                                     |
| GSE21033_CTRL_VS_POLYIC_STIM_DC_12H_UP                            |            |             | 122       |                                     |
| 0.35269615                                                        | 1.4208068  | 0.026694044 |           | 0.031124953                         |

1 2347 "tags=39%, list=17%, signal=46%"  
GSE17721\_LPS\_VS\_PAM3CSK4\_16H\_BMDC\_DN  
GSE17721\_LPS\_VS\_PAM3CSK4\_16H\_BMDC\_DN 148 0.346213  
1.420596 0.014767933 0.031168435 1  
2180 "tags=26%, list=15%, signal=30%"  
GSE22886\_IGM\_MEMORY\_BCELL\_VS\_BM\_PLASMA\_CELL\_UP  
GSE22886\_IGM\_MEMORY\_BCELL\_VS\_BM\_PLASMA\_CELL\_UP 127  
0.34655792 1.4202837 0.00856531 0.031246623  
1 2199 "tags=31%, list=16%, signal=37%"  
GSE37301\_LYMPHOID\_PRIMED\_MPP\_VS\_GRAN\_MONO\_PROGENITOR\_DN  
GSE37301\_LYMPHOID\_PRIMED\_MPP\_VS\_GRAN\_MONO\_PROGENITOR\_DN  
141 0.34860066 1.419784 0.009195402 0.03139299  
1 1900 "tags=31%, list=13%, signal=36%"  
GSE22611\_UNSTIM\_VS\_2H\_MDP\_STIM\_NOD2\_TRANSDUCE HEK293T\_CELL\_UP  
GSE22611\_UNSTIM\_VS\_2H\_MDP\_STIM\_NOD2\_TRANSDUCE HEK293T\_CELL\_UP  
139 0.34175113 1.4193983 0.004246285  
0.031500887 1 2611 "tags=31%, list=19%, signal=38%"  
GSE37301\_MULTIPOTENT\_PROGENITOR\_VS\_RAG2\_KO\_NK\_CELL\_UP  
GSE37301\_MULTIPOTENT\_PROGENITOR\_VS\_RAG2\_KO\_NK\_CELL\_UP  
156 0.34145784 1.41869 0.012195122 0.031716537  
1 2285 "tags=26%, list=16%, signal=31%"  
GSE27786\_BCELL\_VS\_ERYTHROBLAST\_UP GSE27786\_BCELL\_VS\_ERYTHROBLAST\_UP  
139 0.34245026 1.4179732 0.014256619  
0.03195337 1 2638 "tags=35%, list=19%, signal=42%"  
GSE42724\_NAIVE\_BCELL\_VS\_PLASMABLAST\_DN  
GSE42724\_NAIVE\_BCELL\_VS\_PLASMABLAST\_DN 124  
0.35133195 1.4176179 0.030368764 0.03204232  
1 1829 "tags=22%, list=13%, signal=25%"  
GSE32901\_TH1\_VS\_TH17\_ENRICHED\_CD4\_TCELL\_DN  
GSE32901\_TH1\_VS\_TH17\_ENRICHED\_CD4\_TCELL\_DN 116  
0.3541023 1.4173598 0.0256917 0.032114714  
1 2112 "tags=35%, list=15%, signal=41%"  
GSE8685\_IL2\_STARVED\_VS\_IL21\_ACT\_IL2\_STARVED\_CD4\_TCELL\_DN  
GSE8685\_IL2\_STARVED\_VS\_IL21\_ACT\_IL2\_STARVED\_CD4\_TCELL\_DN  
135 0.34188616 1.4173359 0.024742268  
0.032101657 1 1882 "tags=26%, list=13%, signal=30%"  
GSE15330\_WT\_VS\_IKAROS\_KO GRANULOCYTE MONOCYTE PROGENITOR\_DN  
GSE15330\_WT\_VS\_IKAROS\_KO GRANULOCYTE MONOCYTE PROGENITOR\_DN  
163 0.33593228 1.4170309 0.018480493  
0.032163188 1 1847 "tags=28%, list=13%, signal=31%"  
GSE17721\_PAM3CSK4\_VS\_CPG\_12H\_BMDC\_UP  
GSE17721\_PAM3CSK4\_VS\_CPG\_12H\_BMDC\_UP 144  
0.34560135 1.4168056 0.020876827 0.032233845  
1 2299 "tags=35%, list=16%, signal=41%"  
GSE34156\_NOD2\_LIGAND\_VS\_TLR1\_TLR2\_LIGAND\_6H\_TREATED MONOCYTE\_DN  
GSE34156\_NOD2\_LIGAND\_VS\_TLR1\_TLR2\_LIGAND\_6H\_TREATED MONOCYTE\_DN  
133 0.34616598 1.416692 0.013779528  
0.0322489 1 1388 "tags=20%, list=10%, signal=22%"  
GSE15330\_LYMPHOID\_MULTIPOTENT\_VS\_PRO\_BCELL\_DN  
GSE15330\_LYMPHOID\_MULTIPOTENT\_VS\_PRO\_BCELL\_DN 153  
0.34201938 1.4166219 0.012738854 0.032259367  
1 1722 "tags=25%, list=12%, signal=29%"  
GSE19401\_PLN\_VS\_PEYERS\_PATCH\_FOLLICULAR\_DC\_DN  
GSE19401\_PLN\_VS\_PEYERS\_PATCH\_FOLLICULAR\_DC\_DN 156

|                                                                     |                                  |                                  |                                  |
|---------------------------------------------------------------------|----------------------------------|----------------------------------|----------------------------------|
| 0.3393369                                                           | 1.4164999                        | 0.006160164                      | 0.032289956                      |
| 1                                                                   | 2612                             | "tags=37%, list=19%, signal=44%" |                                  |
| GSE13946_CTRL_VS_DSS_COLITIS_GD_TCELL_FROM_COLON_UP                 |                                  |                                  |                                  |
| GSE13946_CTRL_VS_DSS_COLITIS_GD_TCELL_FROM_COLON_UP                 |                                  |                                  |                                  |
| 144                                                                 | 0.34511012                       | 1.4163253                        | 0.012024048                      |
| 0.032328513                                                         | 1                                | 2274                             | "tags=37%, list=16%, signal=43%" |
| GSE17721_CTRL_VS_LPS_8H_BMDC_UP                                     |                                  |                                  |                                  |
| GSE17721_CTRL_VS_LPS_8H_BMDC_UP                                     |                                  |                                  |                                  |
| 150                                                                 | 0.34119853                       | 1.4159331                        | 0.012552301                      |
| 0.03247454                                                          | 1                                | 1705                             | "tags=21%, list=12%, signal=23%" |
| GSE22886_NAIVE_CD8_TCELL_VS_DC_UP                                   |                                  |                                  |                                  |
| GSE22886_NAIVE_CD8_TCELL_VS_DC_UP                                   |                                  |                                  |                                  |
| 128                                                                 | 0.3477366                        | 1.4156828                        | 0.021551725                      |
| 0.032531805                                                         | 1                                | 1810                             | "tags=28%, list=13%, signal=32%" |
| GSE15930_STIM_VS_STIM_AND_IL12_48H_CD8_T_CELL_DN                    |                                  |                                  |                                  |
| GSE15930_STIM_VS_STIM_AND_IL12_48H_CD8_T_CELL_DN                    |                                  |                                  |                                  |
|                                                                     |                                  |                                  | 174                              |
| 0.33133787                                                          | 1.4154423                        | 0.006479482                      | 0.032597832                      |
| 1                                                                   | 1874                             | "tags=30%, list=13%, signal=35%" |                                  |
| GSE16385_MONOCYTE_VS_12H_IFNG_TNF_TREATED_MACROPHAGE_UP             |                                  |                                  |                                  |
| GSE16385_MONOCYTE_VS_12H_IFNG_TNF_TREATED_MACROPHAGE_UP             |                                  |                                  |                                  |
| 146                                                                 | 0.34183878                       | 1.4153435                        | 0.006342495                      |
| 0.032604426                                                         | 1                                | 2586                             | "tags=36%, list=18%, signal=43%" |
| GSE43955_1H_VS_10H_ACT_CD4_TCELL_DN                                 |                                  |                                  |                                  |
| GSE43955_1H_VS_10H_ACT_CD4_TCELL_DN                                 |                                  |                                  |                                  |
|                                                                     |                                  |                                  | 156                              |
| 0.34293613                                                          | 1.4142985                        | 0.016241299                      | 0.032965668                      |
| 1                                                                   | 2206                             | "tags=28%, list=16%, signal=32%" |                                  |
| GSE32128_INOS_DEPENDENT_VS_INOS_INDEPENDENT_ACTIVATED_TCELL_DN      |                                  |                                  |                                  |
| GSE32128_INOS_DEPENDENT_VS_INOS_INDEPENDENT_ACTIVATED_TCELL_DN      |                                  |                                  |                                  |
| 147                                                                 | 0.338495                         | 1.4139928                        | 0.006185567                      |
| 0.03304662                                                          | 1                                | 2587                             | "tags=31%, list=18%, signal=37%" |
| GSE16522_MEMORY_VS_NAIVE_ANTI_CD3CD28_STIM_CD8_TCELL_DN             |                                  |                                  |                                  |
| GSE16522_MEMORY_VS_NAIVE_ANTI_CD3CD28_STIM_CD8_TCELL_DN             |                                  |                                  |                                  |
| 157                                                                 | 0.3405737                        | 1.413838                         | 0.008196721                      |
|                                                                     |                                  |                                  | 0.033086147                      |
| 1                                                                   | 2229                             | "tags=32%, list=16%, signal=38%" |                                  |
| GSE27786_LIN_NEG_VS_NKCELL_UP                                       |                                  |                                  |                                  |
| GSE27786_LIN_NEG_VS_NKCELL_UP                                       |                                  |                                  |                                  |
| 138                                                                 | 0.3406941                        | 1.4129027                        | 0.014553014                      |
| 0.03341467                                                          | 1                                | 2663                             | "tags=31%, list=19%, signal=38%" |
| GSE14308_TH17_VS_INDUCED_TREG_DN                                    |                                  |                                  |                                  |
| GSE14308_TH17_VS_INDUCED_TREG_DN                                    |                                  |                                  |                                  |
| 135                                                                 | 0.3474869                        | 1.412272                         | 0.02385686                       |
| 0.033653263                                                         | 1                                | 1974                             | "tags=27%, list=14%, signal=31%" |
| GSE28237_EARLY_VS_LATE_GC_BCELL_DN                                  |                                  |                                  |                                  |
| GSE28237_EARLY_VS_LATE_GC_BCELL_DN                                  |                                  |                                  |                                  |
|                                                                     |                                  |                                  | 143                              |
| 0.3406609                                                           | 1.4119033                        | 0.010438413                      | 0.033778485                      |
| 1                                                                   | 2344                             | "tags=34%, list=17%, signal=40%" |                                  |
| GSE35685_CD34POS_CD38NEG_VS_CD34POS_CD10NEG_CD62LPOS_BONE_MARROW_UP |                                  |                                  |                                  |
| GSE35685_CD34POS_CD38NEG_VS_CD34POS_CD10NEG_CD62LPOS_BONE_MARROW_UP |                                  |                                  |                                  |
| 155                                                                 | 0.33499697                       | 1.4117225                        | 0.014553014                      |
| 0.03381435                                                          | 1                                | 2414                             | "tags=35%, list=17%, signal=42%" |
| GSE8921_UNSTIM_VS_TLR1_2_STIM_MONOCYTE_12H_DN                       |                                  |                                  |                                  |
| GSE8921_UNSTIM_VS_TLR1_2_STIM_MONOCYTE_12H_DN                       |                                  |                                  |                                  |
|                                                                     |                                  |                                  | 137                              |
| 0.3377336                                                           | 1.4112087                        | 0.015810277                      | 0.033987854                      |
| 1                                                                   | 2199                             | "tags=29%, list=16%, signal=34%" |                                  |
| GSE26023_PHD3_KO_VS_WT_NEUTROPHIL_HYPOXIA_DN                        |                                  |                                  |                                  |
| GSE26023_PHD3_KO_VS_WT_NEUTROPHIL_HYPOXIA_DN                        |                                  |                                  |                                  |
|                                                                     |                                  |                                  | 145                              |
| 0.3353287                                                           | 1.411163                         | 0.015659954                      | 0.033978008                      |
|                                                                     |                                  |                                  | 1                                |
| 2616                                                                | "tags=28%, list=19%, signal=34%" |                                  |                                  |

|                                                                    |                                  |                                  |                                  |   |
|--------------------------------------------------------------------|----------------------------------|----------------------------------|----------------------------------|---|
| GSE3565_DUSP1_VS_WT_SPLENOCYTES_UP                                 |                                  |                                  |                                  |   |
| GSE3565_DUSP1_VS_WT_SPLENOCYTES_UP                                 |                                  |                                  | 134                              |   |
| 0.34306857                                                         | 1.4111477                        | 0.021186441                      | 0.033955626                      |   |
| 1                                                                  | 1737                             | "tags=33%, list=12%, signal=37%" |                                  |   |
| GSE3982_BCELL_VS_EFF_MEMORY_CD4_TCELL_DN                           |                                  |                                  |                                  |   |
| GSE3982_BCELL_VS_EFF_MEMORY_CD4_TCELL_DN                           |                                  |                                  | 132                              |   |
| 0.34307286                                                         | 1.4110223                        | 0.020283977                      | 0.033972852                      |   |
| 1                                                                  | 1739                             | "tags=17%, list=12%, signal=20%" |                                  |   |
| GSE14308_TH2_VS_NAIVE_CD4_TCELL_UP                                 |                                  |                                  |                                  |   |
| GSE14308_TH2_VS_NAIVE_CD4_TCELL_UP                                 |                                  |                                  | 148                              |   |
| 0.34050435                                                         | 1.4104013                        | 0.006060606                      | 0.03418186                       |   |
| 1                                                                  | 2771                             | "tags=39%, list=20%, signal=48%" |                                  |   |
| GSE24142_DN2_VS_DN3_THYMOCYTE_UP                                   | GSE24142_DN2_VS_DN3_THYMOCYTE_UP |                                  |                                  |   |
| 159                                                                | 0.33565846                       | 1.4101714                        | 0.01268499                       |   |
| 0.0342281                                                          | 1                                | 1539                             | "tags=23%, list=11%, signal=26%" |   |
| GSE22601_CD4_SINGLE_POSITIVE_VS_CD8_SINGLE_POSITIVE_THYMOCYTE_DN   |                                  |                                  |                                  |   |
| GSE22601_CD4_SINGLE_POSITIVE_VS_CD8_SINGLE_POSITIVE_THYMOCYTE_DN   |                                  |                                  |                                  |   |
| 140                                                                | 0.3434384                        | 1.4098854                        | 0.021231422                      |   |
| 0.034319293                                                        | 1                                | 2427                             | "tags=31%, list=17%, signal=37%" |   |
| GSE17721_POLYIC_VS_CPG_24H_BMDC_DN                                 |                                  |                                  |                                  |   |
| GSE17721_POLYIC_VS_CPG_24H_BMDC_DN                                 |                                  |                                  | 141                              |   |
| 0.34349248                                                         | 1.4098451                        | 0.010373444                      | 0.034306582                      |   |
| 1                                                                  | 2367                             | "tags=32%, list=17%, signal=38%" |                                  |   |
| GSE9037_CTRL_VS_LPS_4H_STIM_BMDM_UP                                |                                  |                                  |                                  |   |
| GSE9037_CTRL_VS_LPS_4H_STIM_BMDM_UP                                |                                  |                                  | 147                              |   |
| 0.34264365                                                         | 1.409062                         | 0.012958963                      | 0.034593735                      | 1 |
| 1910                                                               | "tags=29%, list=14%, signal=33%" |                                  |                                  |   |
| GSE29618_BCELL_VS_MDC_DAY7_FLU_VACCINE_DN                          |                                  |                                  |                                  |   |
| GSE29618_BCELL_VS_MDC_DAY7_FLU_VACCINE_DN                          |                                  |                                  | 154                              |   |
| 0.33848158                                                         | 1.4088464                        | 0.004319654                      | 0.034639817                      |   |
| 1                                                                  | 2081                             | "tags=31%, list=15%, signal=35%" |                                  |   |
| GSE17186_BLOOD_VS_CORD_BLOOD_CD21LOW_TRANSITIONAL_BCELL_UP         |                                  |                                  |                                  |   |
| GSE17186_BLOOD_VS_CORD_BLOOD_CD21LOW_TRANSITIONAL_BCELL_UP         |                                  |                                  |                                  |   |
| 141                                                                | 0.3426527                        | 1.4085003                        | 0.024175825                      |   |
| 0.03473268                                                         | 1                                | 2103                             | "tags=30%, list=15%, signal=35%" |   |
| GSE2706_LPS_VS_R848_AND_LPS_8H_STIM_DC_UP                          |                                  |                                  |                                  |   |
| GSE2706_LPS_VS_R848_AND_LPS_8H_STIM_DC_UP                          |                                  |                                  | 132                              |   |
| 0.3465431                                                          | 1.4081255                        | 0.012875536                      | 0.034855574                      |   |
| 1                                                                  | 1517                             | "tags=23%, list=11%, signal=25%" |                                  |   |
| GSE39820_CTRL_VS_TGFBETA3_IL6_IL23A_CD4_TCELL_UP                   |                                  |                                  |                                  |   |
| GSE39820_CTRL_VS_TGFBETA3_IL6_IL23A_CD4_TCELL_UP                   |                                  |                                  | 138                              |   |
| 0.34509954                                                         | 1.408024                         | 0.014613778                      | 0.034866426                      | 1 |
| 2020                                                               | "tags=26%, list=14%, signal=30%" |                                  |                                  |   |
| GSE45382_UNTREATED_VS_TGFB_TREATED_MACROPHAGES_UP                  |                                  |                                  |                                  |   |
| GSE45382_UNTREATED_VS_TGFB_TREATED_MACROPHAGES_UP                  |                                  |                                  | 150                              |   |
| 0.34173238                                                         | 1.4078345                        | 0.01871102                       | 0.034907542                      |   |
| 1                                                                  | 2257                             | "tags=33%, list=16%, signal=38%" |                                  |   |
| GSE40274_FOXP3_VS_FOXP3_AND_SATB1_TRANSDUCE_ACTIVATED_CD4_TCELL_UP |                                  |                                  |                                  |   |
| GSE40274_FOXP3_VS_FOXP3_AND_SATB1_TRANSDUCE_ACTIVATED_CD4_TCELL_UP |                                  |                                  |                                  |   |
| 90                                                                 | 0.3675994                        | 1.4071459                        | 0.01863354                       |   |
| 0.03512968                                                         | 1                                | 100                              | "tags=7%, list=1%, signal=7%"    |   |
| GSE19888_ADENOSINE_A3R_ACT_VS_TCELL_MEMBRANES_ACT_IN_MAST_CELL_UP  |                                  |                                  |                                  |   |
| GSE19888_ADENOSINE_A3R_ACT_VS_TCELL_MEMBRANES_ACT_IN_MAST_CELL_UP  |                                  |                                  |                                  |   |
| 155                                                                | 0.3376209                        | 1.407074                         | 0.016701462                      |   |



|                                                                          |                                  |                                   |                                  |                                 |
|--------------------------------------------------------------------------|----------------------------------|-----------------------------------|----------------------------------|---------------------------------|
| 0.035131466                                                              | 1                                | 2193                              | "tags=30%, list=16%, signal=36%" |                                 |
| GSE7831_UNSTIM_VS_INFLUENZA_STIM_PDC_4H_UP                               |                                  |                                   |                                  |                                 |
| GSE7831_UNSTIM_VS_INFLUENZA_STIM_PDC_4H_UP                               |                                  |                                   | 157                              |                                 |
| 0.33537552                                                               | 1.4067993                        | 0.014767933                       | 0.035225447                      |                                 |
| 1                                                                        | 1932                             | "tags=27%, list=14%, signal=31%"  |                                  |                                 |
| GSE360_L_DONOVANI_VS_B_MALAYI_LOW_DOSE_MAC_UP                            |                                  |                                   |                                  |                                 |
| GSE360_L_DONOVANI_VS_B_MALAYI_LOW_DOSE_MAC_UP                            |                                  |                                   |                                  | 144                             |
| 0.33712494                                                               | 1.4065666                        | 0.015555556                       | 0.03527763                       |                                 |
| 1                                                                        | 2519                             | "tags=31%, list=18%, signal=38%"  |                                  |                                 |
| GSE21379_WT_VS_SAP_KO_CD4_TCELL_UP                                       |                                  |                                   |                                  |                                 |
| GSE21379_WT_VS_SAP_KO_CD4_TCELL_UP                                       |                                  |                                   | 150                              |                                 |
| 0.33845338                                                               | 1.4065573                        | 0.014285714                       | 0.0352555                        |                                 |
| 1                                                                        | 1805                             | "tags=21%, list=13%, signal=24%"  |                                  |                                 |
| GSE3982_DC_VS_MAC_LPS_STIM_UP                                            |                                  | GSE3982_DC_VS_MAC_LPS_STIM_UP     |                                  |                                 |
|                                                                          | 141                              | 0.34018457                        | 1.4051862                        | 0.016701462                     |
| 0.03575574                                                               | 1                                | 2170                              | "tags=27%, list=15%, signal=32%" |                                 |
| GSE5542_UNTREATED_VS_IFNG_TREATED_EPITHELIAL_CELLS_6H_DN                 |                                  |                                   |                                  |                                 |
| GSE5542_UNTREATED_VS_IFNG_TREATED_EPITHELIAL_CELLS_6H_DN                 |                                  |                                   |                                  |                                 |
| 143                                                                      | 0.3379244                        | 1.4051636                         | 0.014767933                      |                                 |
| 0.03573849                                                               | 1                                | 2093                              | "tags=29%, list=15%, signal=34%" |                                 |
| GSE17721_LPS_VS_POLYIC_8H_BMDC_UP                                        |                                  | GSE17721_LPS_VS_POLYIC_8H_BMDC_UP |                                  |                                 |
|                                                                          | 150                              | 0.3390479                         | 1.4048691                        | 0.014553014                     |
| 0.0358211                                                                | 1                                | 1420                              | "tags=21%, list=10%, signal=23%" |                                 |
| GSE22140_GERMFREE_VS_SPF_MOUSE_CD4_TCELL_DN                              |                                  |                                   |                                  |                                 |
| GSE22140_GERMFREE_VS_SPF_MOUSE_CD4_TCELL_DN                              |                                  |                                   |                                  | 161                             |
| 0.33239752                                                               | 1.4046822                        | 0.017660044                       | 0.035858586                      |                                 |
| 1                                                                        | 1707                             | "tags=25%, list=12%, signal=29%"  |                                  |                                 |
| GSE29618_PRE_VS_DAY7_POST_TIV_FLU_VACCINE_BCELL_DN                       |                                  |                                   |                                  |                                 |
| GSE29618_PRE_VS_DAY7_POST_TIV_FLU_VACCINE_BCELL_DN                       |                                  |                                   |                                  | 133                             |
| 0.34297642                                                               | 1.4042671                        | 0.014583333                       | 0.035990268                      |                                 |
| 1                                                                        | 2842                             | "tags=40%, list=20%, signal=49%"  |                                  |                                 |
| GSE26727_WT_VS_KLF2_KO_LPS_STIM_MACROPHAGE_DN                            |                                  |                                   |                                  |                                 |
| GSE26727_WT_VS_KLF2_KO_LPS_STIM_MACROPHAGE_DN                            |                                  |                                   |                                  | 146                             |
| 0.34219515                                                               | 1.403429                         | 0.01443299                        | 0.036308207                      | 1                               |
| 2462                                                                     | "tags=41%, list=17%, signal=49%" |                                   |                                  |                                 |
| GSE360_L_MAJOR_VS_B_MALAYI_LOW_DOSE_MAC_DN                               |                                  |                                   |                                  |                                 |
| GSE360_L_MAJOR_VS_B_MALAYI_LOW_DOSE_MAC_DN                               |                                  |                                   | 149                              |                                 |
| 0.33946672                                                               | 1.4032813                        | 0.01091703                        | 0.036347654                      |                                 |
| 1                                                                        | 2380                             | "tags=34%, list=17%, signal=41%"  |                                  |                                 |
| GSE21927_SPLEEN_C57BL6_VS_4T1_TUMOR_BALBC_MONOCYTES_DN                   |                                  |                                   |                                  |                                 |
| GSE21927_SPLEEN_C57BL6_VS_4T1_TUMOR_BALBC_MONOCYTES_DN                   |                                  |                                   |                                  |                                 |
| 129                                                                      | 0.34637305                       | 1.4032652                         | 0.017821781                      |                                 |
| 0.03632483                                                               | 1                                | 2419                              | "tags=36%, list=17%, signal=43%" |                                 |
| GSE29618_PRE_VS_DAY7_POST_TIV_FLU_VACCINE_PDC_DN                         |                                  |                                   |                                  |                                 |
| GSE29618_PRE_VS_DAY7_POST_TIV_FLU_VACCINE_PDC_DN                         |                                  |                                   |                                  | 147                             |
| 0.33879182                                                               | 1.4029981                        | 0.012371134                       | 0.036397062                      |                                 |
| 1                                                                        | 2313                             | "tags=31%, list=16%, signal=37%"  |                                  |                                 |
| GSE5455_HEALTHY_VS_TUMOR_BEARING_MOUSE_SPLEEN_MONOCYTE_24H_INCUBATION_DN |                                  |                                   |                                  |                                 |
| GSE5455_HEALTHY_VS_TUMOR_BEARING_MOUSE_SPLEEN_MONOCYTE_24H_INCUBATION_DN |                                  |                                   |                                  |                                 |
|                                                                          | 152                              | 0.3411842                         | 1.4028797                        |                                 |
| 0.00589391                                                               | 0.0364145                        | 1                                 | 1309                             | "tags=23%, list=9%, signal=25%" |
| GSE17721_LPS_VS_CPG_8H_BMDC_UP                                           |                                  | GSE17721_LPS_VS_CPG_8H_BMDC_UP    |                                  |                                 |

|                                                                  |      |            |                                  |             |
|------------------------------------------------------------------|------|------------|----------------------------------|-------------|
| 0.036500502                                                      | 158  | 0.33542103 | 1.4025724                        | 0.011605416 |
| GSE21063_CTRL_VS_ANTI_IGM_STIM_BCELL_NFATC1_KO_3H_UP             | 1    | 2132       | "tags=27%, list=15%, signal=31%" |             |
| GSE21063_CTRL_VS_ANTI_IGM_STIM_BCELL_NFATC1_KO_3H_UP             |      |            |                                  |             |
| 0.036621958                                                      | 157  | 0.33628944 | 1.4021496                        | 0.011650485 |
| GSE17721_LPS_VS_PAM3CSK4_8H_BMDC_DN                              | 1    | 2168       | "tags=30%, list=15%, signal=35%" |             |
| GSE17721_LPS_VS_PAM3CSK4_8H_BMDC_DN                              |      |            |                                  | 143         |
| 0.33498502                                                       | 2972 | 1.401679   | 0.016                            | 0.03679511  |
| GSE17721_POLYIC_VS_GARDIQUIMOD_1H_BMDC_DN                        | 1    |            | "tags=38%, list=21%, signal=48%" | 1           |
| GSE17721_POLYIC_VS_GARDIQUIMOD_1H_BMDC_DN                        |      |            |                                  | 158         |
| 0.33490193                                                       | 1    | 1.4013244  | 0.019396551                      | 0.036903117 |
| GSE3982_NEUTROPHIL_VS_BCELL_UP                                   | 1465 |            | "tags=24%, list=10%, signal=27%" |             |
| GSE3982_NEUTROPHIL_VS_BCELL_UP                                   |      |            |                                  |             |
| 0.037458327                                                      | 139  | 0.34309933 | 1.3998234                        | 0.024489796 |
| GSE7460_TREG_VS_TCONV_ACT_WITH_TGFB_DN                           | 1    | 2496       | "tags=28%, list=18%, signal=34%" |             |
| GSE7460_TREG_VS_TCONV_ACT_WITH_TGFB_DN                           |      |            |                                  | 142         |
| 0.33448642                                                       | 1    | 1.3994392  | 0.017021276                      | 0.037608758 |
| GSE2770_IL4_ACT_VS_ACT_CD4_TCELL_6H_DN                           | 2046 |            | "tags=29%, list=14%, signal=33%" |             |
| GSE2770_IL4_ACT_VS_ACT_CD4_TCELL_6H_DN                           |      |            |                                  | 140         |
| 0.34262535                                                       | 1    | 1.3991958  | 0.016597511                      | 0.037689064 |
| GSE2706_UNSTIM_VS_8H_LPS_DC_UP                                   | 1659 |            | "tags=25%, list=12%, signal=28%" |             |
| GSE2706_UNSTIM_VS_8H_LPS_DC_UP                                   |      |            |                                  |             |
| 0.03768023                                                       | 140  | 0.3440418  | 1.3991438                        | 0.022222223 |
| GSE10325_CD4_TCELL_VS_BCELL_UP                                   | 1    | 1898       | "tags=26%, list=13%, signal=30%" |             |
| GSE10325_CD4_TCELL_VS_BCELL_UP                                   |      |            |                                  |             |
| 0.037750836                                                      | 161  | 0.3309688  | 1.3988627                        | 0.016877636 |
| GSE360_LOW_DOSE_B_MALAYI_VS_M_TUBERCULOSIS_DC_UP                 | 1    | 1579       | "tags=27%, list=11%, signal=30%" |             |
| GSE360_LOW_DOSE_B_MALAYI_VS_M_TUBERCULOSIS_DC_UP                 |      |            |                                  | 150         |
| 0.33678564                                                       | 1    | 1.3986201  | 0.022088353                      | 0.03781181  |
| GSE14000_TRANSLATED_RNA_VS_MRNA_DC_UP                            | 2036 |            | "tags=28%, list=14%, signal=32%" |             |
| GSE14000_TRANSLATED_RNA_VS_MRNA_DC_UP                            |      |            |                                  |             |
| 0.3395965                                                        | 1    | 1.3982787  | 0.006410257                      | 0.03792812  |
| GSE25087_FETAL_VS_ADULT_TCONV_UP                                 | 2586 |            | "tags=35%, list=18%, signal=43%" |             |
| GSE25087_FETAL_VS_ADULT_TCONV_UP                                 |      |            |                                  |             |
| 0.03835172                                                       | 141  | 0.3398353  | 1.3972744                        | 0.018556701 |
| GSE25123_WT_VS_PPARG_KO_MACROPHAGE_IL4_AND_ROSIGLITAZONE_STIM_UP | 1    | 2330       | "tags=35%, list=17%, signal=42%" |             |
| GSE25123_WT_VS_PPARG_KO_MACROPHAGE_IL4_AND_ROSIGLITAZONE_STIM_UP |      |            |                                  |             |
| 0.03845466                                                       | 121  | 0.3501819  | 1.3969603                        | 0.023012552 |
| GSE14308_TH1_VS_INDUCED_TREG_DN                                  | 1    | 1475       | "tags=20%, list=10%, signal=22%" |             |
| GSE14308_TH1_VS_INDUCED_TREG_DN                                  |      |            |                                  |             |
| 0.03890199                                                       | 136  | 0.34486866 | 1.3959593                        | 0.020408163 |
| GSE360_L_DONOVANI_VS_T_GONDII_MAC_DN                             | 1    | 2882       | "tags=36%, list=20%, signal=45%" |             |
| GSE360_L_DONOVANI_VS_T_GONDII_MAC_DN                             |      |            |                                  | 161         |
| 0.33073947                                                       | 1    | 1.3958327  | 0.008830022                      | 0.03892176  |
| GSE42088_UNINF_VS_LEISHMANIA_INF_DC_24H_UP                       | 2282 |            | "tags=29%, list=16%, signal=34%" |             |

|                                                                     |                                   |                                  |                                  |     |
|---------------------------------------------------------------------|-----------------------------------|----------------------------------|----------------------------------|-----|
| GSE42088_UNINF_VS_LEISHMANIA_INF_DC_24H_UP                          | 156                               |                                  |                                  |     |
| 0.33429688                                                          | 1.3954582                         | 0.01026694                       | 0.03905075                       |     |
| 1                                                                   | 1703                              | "tags=26%, list=12%, signal=30%" |                                  |     |
| GSE17721_CTRL_VS_LPS_24H_BMDC_DN                                    | GSE17721_CTRL_VS_LPS_24H_BMDC_DN  |                                  |                                  |     |
| 150                                                                 | 0.33561727                        | 1.3951318                        | 0.013544018                      |     |
| 0.039172206                                                         | 1                                 | 2482                             | "tags=35%, list=18%, signal=42%" |     |
| GSE17721_POLYIC_VS_PAM3CSK4_4H_BMDC_UP                              |                                   |                                  |                                  |     |
| GSE17721_POLYIC_VS_PAM3CSK4_4H_BMDC_UP                              |                                   |                                  | 158                              |     |
| 0.3341658                                                           | 1.3947215                         | 0.012                            | 0.039309863                      | 1   |
| 2224                                                                | "tags=27%, list=16%, signal=32%"  |                                  |                                  |     |
| GSE360_LOW_DOSE_B_MALAYI_VS_M_TUBERCULOSIS_DC_DN                    |                                   |                                  |                                  |     |
| GSE360_LOW_DOSE_B_MALAYI_VS_M_TUBERCULOSIS_DC_DN                    |                                   |                                  |                                  | 154 |
| 0.33398944                                                          | 1.3942761                         | 0.013215859                      | 0.039463557                      |     |
| 1                                                                   | 1567                              | "tags=26%, list=11%, signal=29%" |                                  |     |
| GSE2935_UV_INACTIVATED_VS_LIVE_SENDAI_VIRUS_INF_MACROPHAGE_DN       |                                   |                                  |                                  |     |
| GSE2935_UV_INACTIVATED_VS_LIVE_SENDAI_VIRUS_INF_MACROPHAGE_DN       |                                   |                                  |                                  |     |
| 151                                                                 | 0.33648756                        | 1.3937734                        | 0.019693654                      |     |
| 0.039622054                                                         | 1                                 | 2274                             | "tags=39%, list=16%, signal=46%" |     |
| GSE15330_HSC_VS_LYMPHOID_PRIMED_MULTIPOTENT_PROGENITOR_IKAROS_KO_DN |                                   |                                  |                                  |     |
| GSE15330_HSC_VS_LYMPHOID_PRIMED_MULTIPOTENT_PROGENITOR_IKAROS_KO_DN |                                   |                                  |                                  |     |
| 152                                                                 | 0.3355929                         | 1.3937125                        | 0.02631579                       |     |
| 0.03961711                                                          | 1                                 | 2238                             | "tags=30%, list=16%, signal=35%" |     |
| GSE17721_CTRL_VS_CPG_0.5H_BMDC_UP                                   | GSE17721_CTRL_VS_CPG_0.5H_BMDC_UP |                                  |                                  |     |
| 155                                                                 | 0.33116376                        | 1.3931608                        | 0.014799154                      |     |
| 0.039818138                                                         | 1                                 | 2041                             | "tags=25%, list=14%, signal=29%" |     |
| GSE43863_NAIVE_VS_TFH_CD4_EFF_TCELL_D6_LCMV_UP                      |                                   |                                  |                                  |     |
| GSE43863_NAIVE_VS_TFH_CD4_EFF_TCELL_D6_LCMV_UP                      |                                   |                                  |                                  | 139 |
| 0.34123015                                                          | 1.3930883                         | 0.010183299                      | 0.0398182                        |     |
| 1                                                                   | 1383                              | "tags=19%, list=10%, signal=21%" |                                  |     |
| GSE2770_TGFB_AND_IL4_VS_IL12_TREATED_ACT_CD4_TCELL_48H_DN           |                                   |                                  |                                  |     |
| GSE2770_TGFB_AND_IL4_VS_IL12_TREATED_ACT_CD4_TCELL_48H_DN           |                                   |                                  |                                  |     |
| 136                                                                 | 0.3386931                         | 1.3923677                        | 0.027149322                      |     |
| 0.040111605                                                         | 1                                 | 2389                             | "tags=35%, list=17%, signal=41%" |     |
| GSE1432_CTRL_VS_IFNG_6H_MICROGLIA_UP                                |                                   |                                  |                                  |     |
| GSE1432_CTRL_VS_IFNG_6H_MICROGLIA_UP                                |                                   |                                  |                                  | 154 |
| 0.33442512                                                          | 1.3916321                         | 0.016096579                      | 0.040408086                      |     |
| 1                                                                   | 1896                              | "tags=23%, list=13%, signal=27%" |                                  |     |
| GSE17721_POLYIC_VS_GARDIQUIMOD_8H_BMDC_DN                           |                                   |                                  |                                  |     |
| GSE17721_POLYIC_VS_GARDIQUIMOD_8H_BMDC_DN                           |                                   |                                  |                                  | 141 |
| 0.33848706                                                          | 1.3914398                         | 0.017621145                      | 0.040466327                      |     |
| 1                                                                   | 2747                              | "tags=35%, list=19%, signal=44%" |                                  |     |
| GSE5589_WT_VS_IL10_KO_LPS_AND_IL10_STIM_MACROPHAGE_180MIN_UP        |                                   |                                  |                                  |     |
| GSE5589_WT_VS_IL10_KO_LPS_AND_IL10_STIM_MACROPHAGE_180MIN_UP        |                                   |                                  |                                  |     |
| 124                                                                 | 0.34765333                        | 1.3911204                        | 0.02079002                       |     |
| 0.040568534                                                         | 1                                 | 2474                             | "tags=31%, list=18%, signal=37%" |     |
| GSE6674_UNSTIM_VS_PL2_3_STIM_BCELL_UP                               |                                   |                                  |                                  |     |
| GSE6674_UNSTIM_VS_PL2_3_STIM_BCELL_UP                               |                                   |                                  |                                  | 112 |
| 0.3512485                                                           | 1.3902308                         | 0.023454158                      | 0.04094233                       |     |
| 1                                                                   | 1071                              | "tags=16%, list=8%, signal=17%"  |                                  |     |
| GSE10240_CTRL_VS_IL22_STIM_PRIMARY_BRONCHIAL_EPITHELIAL_CELLS_DN    |                                   |                                  |                                  |     |
| GSE10240_CTRL_VS_IL22_STIM_PRIMARY_BRONCHIAL_EPITHELIAL_CELLS_DN    |                                   |                                  |                                  |     |
| 132                                                                 | 0.34219512                        | 1.3901358                        | 0.008658009                      |     |
| 0.040963892                                                         | 1                                 | 2298                             | "tags=31%, list=16%, signal=37%" |     |
| GSE2770_UNTREATED_VS_TGFB_AND_IL4_TREATED_ACT_CD4_TCELL_48H_DN      |                                   |                                  |                                  |     |

GSE2770\_UNTREATED\_VS\_TGFB\_AND\_IL4\_TREATED\_ACT\_CD4\_TCELL\_48H\_DN  
151 0.33427837 1.389877 0.022869023  
0.041058406 1 1903 "tags=27%, list=13%, signal=31%"  
GSE13411\_SWITCHED\_MEMORY\_BCELL\_VS\_PLASMA\_CELL\_DN  
GSE13411\_SWITCHED\_MEMORY\_BCELL\_VS\_PLASMA\_CELL\_DN 131  
0.3432248 1.3892637 0.019189766 0.041302152  
1 1377 "tags=16%, list=10%, signal=18%"  
GSE15324\_ELF4\_KO\_VS\_WT\_NAIVE\_CD8\_TCELL\_UP  
GSE15324\_ELF4\_KO\_VS\_WT\_NAIVE\_CD8\_TCELL\_UP 144  
0.3392387 1.3887253 0.02783726 0.04152361  
1 1171 "tags=17%, list=8%, signal=19%"  
GSE36527\_CD62L\_HIGH\_VS\_CD62L\_LOW\_TREG\_CD69\_NEG\_KLRG1\_NEG\_UP  
GSE36527\_CD62L\_HIGH\_VS\_CD62L\_LOW\_TREG\_CD69\_NEG\_KLRG1\_NEG\_UP  
154 0.33481163 1.3883681 0.010729614  
0.041652866 1 2099 "tags=32%, list=15%, signal=37%"  
GSE37534\_PIOGLITAZONE\_VS\_ROSIGLITAZONE\_TREATED\_CD4\_TCELL\_PPARG1\_FOXP  
3\_TRANSDUCE\_UP  
GSE37534\_PIOGLITAZONE\_VS\_ROSIGLITAZONE\_TREATED\_CD4\_TCELL\_PPARG1\_FOXP  
3\_TRANSDUCE\_UP 135 0.33729854 1.3883384  
0.023305085 0.04163108 1 2238 "tags=30%,  
list=16%, signal=35%"  
GSE22886\_UNSTIM\_VS\_STIM\_MEMORY\_TCELL\_UP  
GSE22886\_UNSTIM\_VS\_STIM\_MEMORY\_TCELL\_UP 137  
0.3391121 1.3882533 0.008264462 0.041627258  
1 1610 "tags=21%, list=11%, signal=24%"  
GSE41978\_WT\_VS\_ID2\_KO\_AND\_BIM\_KO\_KLRG1\_LOW\_EFFECTOR\_CD8\_TCELL\_DN  
GSE41978\_WT\_VS\_ID2\_KO\_AND\_BIM\_KO\_KLRG1\_LOW\_EFFECTOR\_CD8\_TCELL\_DN  
158 0.32924893 1.3877099 0.021786492  
0.04182269 1 1691 "tags=23%, list=12%, signal=26%"  
GSE1925\_CTRL\_VS\_IFNG\_PRIMED\_MACROPHAGE\_DN  
GSE1925\_CTRL\_VS\_IFNG\_PRIMED\_MACROPHAGE\_DN 145  
0.33722755 1.3873905 0.025229357 0.041938208  
1 1278 "tags=21%, list=9%, signal=23%"  
GSE28737\_WT\_VS\_BCL6\_KO\_FOLLICULAR\_BCELL\_DN  
GSE28737\_WT\_VS\_BCL6\_KO\_FOLLICULAR\_BCELL\_DN 158  
0.33067888 1.387219 0.016 0.04199135 1  
2361 "tags=32%, list=17%, signal=38%"  
GSE40273\_XBP1\_KO\_VS\_WT\_TREG\_UP GSE40273\_XBP1\_KO\_VS\_WT\_TREG\_UP  
147 0.33438513 1.3855922 0.026804123  
0.042718273 1 2629 "tags=35%, list=19%, signal=42%"  
GSE3720\_UNSTIM\_VS\_PMA\_STIM\_VD2\_GAMMADELTA\_TCELL\_UP  
GSE3720\_UNSTIM\_VS\_PMA\_STIM\_VD2\_GAMMADELTA\_TCELL\_UP 122  
0.34246653 1.3853277 0.034042552 0.042802956  
1 1824 "tags=34%, list=13%, signal=38%"  
GSE17974\_0H\_VS\_4H\_IN\_VITRO\_ACT\_CD4\_TCELL\_DN  
GSE17974\_0H\_VS\_4H\_IN\_VITRO\_ACT\_CD4\_TCELL\_DN 130  
0.33969608 1.3852597 0.022680413 0.042800732  
1 1794 "tags=25%, list=13%, signal=29%"  
GSE40274\_FOXP3\_VS\_FOXP3\_AND\_IRF4\_TRANSDUCE\_ACTIVATED\_CD4\_TCELL\_DN  
GSE40274\_FOXP3\_VS\_FOXP3\_AND\_IRF4\_TRANSDUCE\_ACTIVATED\_CD4\_TCELL\_DN  
144 0.33367875 1.3850665 0.026666667  
0.042858243 1 1871 "tags=26%, list=13%, signal=29%"  
GSE37534\_GW1929\_VS\_ROSIGLITAZONE\_TREATED\_CD4\_TCELL\_PPARG1\_FOXP3\_TRAN  
SDUCE\_UP

GSE37534\_GW1929\_VS\_ROSIGLITAZONE\_TREATED\_CD4\_TCELL\_PPARG1\_FOXP3\_TRAN  
SDUCED\_UP 118 0.34808236 1.3838658  
0.025 0.043380775 1 1678 "tags=25%, list=12%,  
signal=28%"

GSE40277\_EOS\_AND\_LEF1\_TRANSDUCECD\_VS\_CTRL\_CD4\_TCELL\_DN  
GSE40277\_EOS\_AND\_LEF1\_TRANSDUCECD\_VS\_CTRL\_CD4\_TCELL\_DN  
152 0.3310863 1.3832537 0.018867925  
0.04363762 1 2463 "tags=30%, list=17%, signal=35%"

GSE6259\_FLT3L\_INDUCED\_33D1\_POS\_DC\_VS\_CD8\_TCELL\_DN  
GSE6259\_FLT3L\_INDUCED\_33D1\_POS\_DC\_VS\_CD8\_TCELL\_DN 121  
0.34243894 1.3827293 0.020920502 0.043864828  
1 2036 "tags=26%, list=14%, signal=30%"

GSE2770\_TGFB\_AND\_IL4\_VS\_IL4\_TREATED\_ACT\_CD4\_TCELL\_2H\_DN  
GSE2770\_TGFB\_AND\_IL4\_VS\_IL4\_TREATED\_ACT\_CD4\_TCELL\_2H\_DN  
135 0.337614 1.3808137 0.028688524 0.044769876  
1 1752 "tags=21%, list=12%, signal=24%"

GSE16385\_MONOCYTE\_VS\_12H\_ROSIGLITAZONE\_IFNG\_TNF\_TREATED\_MACROPHAGE\_D  
N  
GSE16385\_MONOCYTE\_VS\_12H\_ROSIGLITAZONE\_IFNG\_TNF\_TREATED\_MACROPHAGE\_D  
N  
148 0.3323705 1.3797415  
0.020876827 0.04523537 1 1833 "tags=22%,  
list=13%, signal=25%"

GSE41176\_UNSTIM\_VS\_ANTI\_IGM\_STIM\_TAK1\_KO\_BCELL\_1H\_UP  
GSE41176\_UNSTIM\_VS\_ANTI\_IGM\_STIM\_TAK1\_KO\_BCELL\_1H\_UP  
136 0.33934814 1.379581 0.010660981 0.04528139  
1 2594 "tags=38%, list=18%, signal=46%"

GSE37301\_PRO\_BCELL\_VS\_RAG2\_KO\_NK\_CELL\_UP  
GSE37301\_PRO\_BCELL\_VS\_RAG2\_KO\_NK\_CELL\_UP 150  
0.33070293 1.3794683 0.032989692 0.045308832  
1 2437 "tags=35%, list=17%, signal=42%"

GSE339\_CD4POS\_VS\_CD8POS\_DC\_DN GSE339\_CD4POS\_VS\_CD8POS\_DC\_DN  
160 0.32945955 1.3779445 0.026915114  
0.04603111 1 2234 "tags=31%, list=16%, signal=37%"

GSE43955\_1H\_VS\_60H\_ACT\_CD4\_TCELL\_WITH\_TGFB\_IL6\_UP  
GSE43955\_1H\_VS\_60H\_ACT\_CD4\_TCELL\_WITH\_TGFB\_IL6\_UP 154  
0.33105534 1.3779131 0.01923077 0.046008036  
1 1900 "tags=26%, list=13%, signal=30%"

GSE17721\_PAM3CSK4\_VS\_GADIQUIMOD\_2H\_BMDC\_DN  
GSE17721\_PAM3CSK4\_VS\_GADIQUIMOD\_2H\_BMDC\_DN 133  
0.33279788 1.3778656 0.026530612 0.045994308  
1 2297 "tags=32%, list=16%, signal=38%"

GSE37416\_CTRL\_VS\_24H\_F\_TULARENSIS\_LVS\_NEUTROPHIL\_UP  
GSE37416\_CTRL\_VS\_24H\_F\_TULARENSIS\_LVS\_NEUTROPHIL\_UP  
133 0.33442408 1.3777274 0.020833334  
0.046032272 1 2413 "tags=35%, list=17%, signal=41%"

GSE2826\_WT\_VS\_BTK\_KO\_BCELL\_DN GSE2826\_WT\_VS\_BTK\_KO\_BCELL\_DN  
154 0.3277732 1.3777077 0.026156941  
0.046006776 1 1227 "tags=21%, list=9%, signal=23%"

GSE17721\_CTRL\_VS\_PAM3CSK4\_4H\_BMDC\_UP  
GSE17721\_CTRL\_VS\_PAM3CSK4\_4H\_BMDC\_UP 135  
0.33503106 1.3776114 0.022680413 0.04602511  
1 1697 "tags=25%, list=12%, signal=28%"

GSE45739\_NRAS\_KO\_VS\_WT\_ACD3\_ACD28\_STIM\_CD4\_TCELL\_UP  
GSE45739\_NRAS\_KO\_VS\_WT\_ACD3\_ACD28\_STIM\_CD4\_TCELL\_UP

138 0.3396444 1.377424 0.022727273 0.04608983  
1 2010 "tags=26%, list=14%, signal=30%"  
GSE43955\_TGFB\_IL6\_VS\_TGFB\_IL6\_IL23\_TH17\_ACT\_CD4\_TCELL\_52H\_UP  
GSE43955\_TGFB\_IL6\_VS\_TGFB\_IL6\_IL23\_TH17\_ACT\_CD4\_TCELL\_52H\_UP  
157 0.33007202 1.3772811 0.016949153  
0.04614956 1 3023 "tags=34%, list=21%, signal=43%"  
GSE24574\_NAIVE\_VS\_TCONV\_CD4\_TCELL\_UP  
GSE24574\_NAIVE\_VS\_TCONV\_CD4\_TCELL\_UP 144  
0.33458874 1.3766952 0.019693654 0.046396688  
1 1725 "tags=19%, list=12%, signal=22%"  
GSE2770\_UNTREATED\_VS\_TGFB\_AND\_IL4\_TREATED\_ACT\_CD4\_TCELL\_2H\_DN  
GSE2770\_UNTREATED\_VS\_TGFB\_AND\_IL4\_TREATED\_ACT\_CD4\_TCELL\_2H\_DN  
143 0.33356354 1.3766865 0.014644352  
0.046366815 1 2010 "tags=28%, list=14%, signal=32%"  
GSE17721\_LPS\_VS\_GARDIQUIMOD\_0.5H\_BMDC\_DN  
GSE17721\_LPS\_VS\_GARDIQUIMOD\_0.5H\_BMDC\_DN 148  
0.33376893 1.3763909 0.016736401 0.046473052  
1 2404 "tags=28%, list=17%, signal=33%"  
GSE43955\_TH0\_VS\_TGFB\_IL6\_TH17\_ACT\_CD4\_TCELL\_4H\_DN  
GSE43955\_TH0\_VS\_TGFB\_IL6\_TH17\_ACT\_CD4\_TCELL\_4H\_DN 161  
0.32869762 1.3761804 0.018404908 0.04653433  
1 2093 "tags=28%, list=15%, signal=32%"  
GSE17721\_CTRL\_VS\_GARDIQUIMOD\_24H\_BMDC\_DN  
GSE17721\_CTRL\_VS\_GARDIQUIMOD\_24H\_BMDC\_DN 145  
0.33206147 1.3751239 0.025531914 0.0470147  
1 2610 "tags=34%, list=18%, signal=42%"  
GSE21546\_SAP1A\_KO\_VS\_SAP1A\_KO\_AND\_ELK1\_KO\_ANTI\_CD3\_STIM\_DP\_THYMOCYTE  
S\_UP  
GSE21546\_SAP1A\_KO\_VS\_SAP1A\_KO\_AND\_ELK1\_KO\_ANTI\_CD3\_STIM\_DP\_THYMOCYTE  
S\_UP 143 0.3343307 1.3751041  
0.010373444 0.04699196 1 2349 "tags=28%,  
list=17%, signal=33%"  
GSE5589\_LPS\_AND\_IL10\_VS\_LPS\_AND\_IL6\_STIM\_IL6\_KO\_MACROPHAGE\_45MIN\_UP  
GSE5589\_LPS\_AND\_IL10\_VS\_LPS\_AND\_IL6\_STIM\_IL6\_KO\_MACROPHAGE\_45MIN\_UP  
144 0.33157808 1.3749838 0.026422765  
0.047013003 1 2298 "tags=36%, list=16%, signal=43%"  
GSE14000\_UNSTIM\_VS\_4H\_LPS\_DC\_UP GSE14000\_UNSTIM\_VS\_4H\_LPS\_DC\_UP  
123 0.34276205 1.3749394 0.022540983  
0.04700298 1 2499 "tags=37%, list=18%, signal=44%"  
GSE10240\_IL22\_VS\_IL17\_STIM\_PRIMARY\_BRONCHIAL\_EPITHELIAL\_CELLS\_UP  
GSE10240\_IL22\_VS\_IL17\_STIM\_PRIMARY\_BRONCHIAL\_EPITHELIAL\_CELLS\_UP  
137 0.33859935 1.374659 0.030364372  
0.04708584 1 1860 "tags=25%, list=13%, signal=28%"  
GSE22611\_NOD2\_VS\_CTRL\_TRANSDUCE\_HEK293T\_CELL\_DN  
GSE22611\_NOD2\_VS\_CTRL\_TRANSDUCE\_HEK293T\_CELL\_DN 138  
0.33321515 1.3745447 0.016771488 0.047114883  
1 2036 "tags=30%, list=14%, signal=34%"  
GSE22935\_WT\_VS\_MYD88\_KO\_MACROPHAGE\_48H\_MBOVIS\_BCG\_STIM\_DN  
GSE22935\_WT\_VS\_MYD88\_KO\_MACROPHAGE\_48H\_MBOVIS\_BCG\_STIM\_DN  
147 0.33448866 1.3741434 0.019480519  
0.047292035 1 1820 "tags=30%, list=13%, signal=34%"  
GSE17322\_CD103\_POS\_VS\_CD11B\_HIGH\_LUNG\_DC\_DN  
GSE17322\_CD103\_POS\_VS\_CD11B\_HIGH\_LUNG\_DC\_DN 146  
0.337035 1.3733633 0.025157232 0.047656737 1

2697 "tags=37%, list=19%, signal=45%"  
GSE22140\_HEALTHY\_VS\_ARTHROITIC\_MOUSE\_CD4\_TCELL\_DN  
GSE22140\_HEALTHY\_VS\_ARTHROITIC\_MOUSE\_CD4\_TCELL\_DN 160  
0.32920596 1.3726326 0.016913319 0.0479882  
1 2654 "tags=35%, list=19%, signal=43%"  
GSE26495\_NAIVE\_VS\_PD1HIGH\_CD8\_TCELL\_DN  
GSE26495\_NAIVE\_VS\_PD1HIGH\_CD8\_TCELL\_DN 139  
0.3343104 1.3726003 0.037815128 0.047976613  
1 2000 "tags=28%, list=14%, signal=32%"  
GSE18281\_MEDULLARY\_THYMOCYTE\_VS\_WHOLE\_MEDULLA\_THYMUS\_DN  
GSE18281\_MEDULLARY\_THYMOCYTE\_VS\_WHOLE\_MEDULLA\_THYMUS\_DN  
121 0.34077215 1.3723476 0.034334764  
0.048061494 1 2641 "tags=37%, list=19%, signal=45%"  
GSE46606\_IRF4MID\_VS\_WT\_CD40L\_IL2\_IL5\_DAY3\_STIMULATED\_BCELL\_DN  
GSE46606\_IRF4MID\_VS\_WT\_CD40L\_IL2\_IL5\_DAY3\_STIMULATED\_BCELL\_DN  
147 0.33095777 1.372324 0.028077753  
0.048042327 1 1840 "tags=31%, list=13%, signal=35%"  
GSE17721\_LPS\_VS\_GARDIQUIMOD\_12H\_BMDC\_UP  
GSE17721\_LPS\_VS\_GARDIQUIMOD\_12H\_BMDC\_UP 155  
0.33218908 1.3719788 0.023904383 0.048182674  
1 2320 "tags=27%, list=16%, signal=32%"  
GSE22886\_NAIVE\_CD8\_TCELL\_VS\_NKCELL\_UP  
GSE22886\_NAIVE\_CD8\_TCELL\_VS\_NKCELL\_UP 139  
0.3326063 1.3702738 0.027542373 0.04900312  
1 1873 "tags=28%, list=13%, signal=32%"  
GSE6674\_UNSTIM\_VS\_CPG\_STIM\_BCELL\_UP  
GSE6674\_UNSTIM\_VS\_CPG\_STIM\_BCELL\_UP 117  
0.33995515 1.3702277 0.02826087 0.048994996  
1 2081 "tags=26%, list=15%, signal=30%"  
GSE3982\_EOSINOPHIL\_VS\_MAC\_DN GSE3982\_EOSINOPHIL\_VS\_MAC\_DN  
155 0.32971582 1.3684393 0.022680413  
0.049878817 1 2643 "tags=37%, list=19%, signal=46%"  
GSE17721\_CTRL\_VS\_GARDIQUIMOD\_6H\_BMDC\_UP  
GSE17721\_CTRL\_VS\_GARDIQUIMOD\_6H\_BMDC\_UP 146  
0.3313284 1.3671515 0.020703934 0.05050982  
1 1901 "tags=25%, list=13%, signal=28%"  
GSE43955\_TGFB\_IL6\_VS\_TGFB\_IL6\_IL23\_TH17\_ACT\_CD4\_TCELL\_60H\_DN  
GSE43955\_TGFB\_IL6\_VS\_TGFB\_IL6\_IL23\_TH17\_ACT\_CD4\_TCELL\_60H\_DN  
165 0.32419232 1.3668686 0.018947368  
0.050615784 1 1389 "tags=17%, list=10%, signal=19%"  
GSE32164\_ALTERNATIVELY\_ACT\_M2\_VS\_CMYC\_INHIBITED\_MACROPHAGE\_UP  
GSE32164\_ALTERNATIVELY\_ACT\_M2\_VS\_CMYC\_INHIBITED\_MACROPHAGE\_UP  
154 0.32693687 1.3661343 0.01875  
0.05099047 1 2698 "tags=36%, list=19%, signal=44%"  
GSE25088\_CTRL\_VS\_IL4\_AND\_ROSIGLITAZONE\_STIM\_MACROPHAGE\_DN  
GSE25088\_CTRL\_VS\_IL4\_AND\_ROSIGLITAZONE\_STIM\_MACROPHAGE\_DN  
117 0.34213945 1.3655833 0.031446543  
0.05124437 1 2525 "tags=34%, list=18%, signal=41%"  
GSE40666\_NAIVE\_VS\_EFFECTOR\_CD8\_TCELL\_WITH\_IFNA\_STIM\_90MIN\_DN  
GSE40666\_NAIVE\_VS\_EFFECTOR\_CD8\_TCELL\_WITH\_IFNA\_STIM\_90MIN\_DN  
148 0.32896096 1.3650702 0.0186722  
0.05150691 1 1015 "tags=18%, list=7%, signal=19%"  
GSE1432\_CTRL\_VS\_IFNG\_24H\_MICROGLIA\_DN  
GSE1432\_CTRL\_VS\_IFNG\_24H\_MICROGLIA\_DN 137

|                                                                   |            |                                  |                                  |
|-------------------------------------------------------------------|------------|----------------------------------|----------------------------------|
| 0.33248118                                                        | 1.3650376  | 0.027196653                      | 0.051488005                      |
| 1                                                                 | 2444       | "tags=39%, list=17%, signal=46%" |                                  |
| GSE42724_B1_BCELL_VS_PLASMABLAST_UP                               |            |                                  |                                  |
| GSE42724_B1_BCELL_VS_PLASMABLAST_UP                               |            |                                  | 151                              |
| 0.32729986                                                        | 1.3648282  | 0.024048096                      | 0.05156416                       |
| 1                                                                 | 2041       | "tags=25%, list=14%, signal=28%" |                                  |
| GSE37605_TREG_VS_TCONV_C57BL6_FOXP3_FUSION_GFP_DN                 |            |                                  |                                  |
| GSE37605_TREG_VS_TCONV_C57BL6_FOXP3_FUSION_GFP_DN                 |            |                                  | 137                              |
| 0.33238152                                                        | 1.3646587  | 0.030120483                      | 0.05162879                       |
| 1                                                                 | 2390       | "tags=37%, list=17%, signal=44%" |                                  |
| GSE37416_CTRL_VS_48H_F_TULARENSIS_LVS_NEUTROPHIL_UP               |            |                                  |                                  |
| GSE37416_CTRL_VS_48H_F_TULARENSIS_LVS_NEUTROPHIL_UP               |            |                                  |                                  |
| 114                                                               | 0.3388693  | 1.36413                          | 0.026804123                      |
| 1                                                                 | 1399       | "tags=22%, list=10%, signal=24%" | 0.051867224                      |
| GSE17721_LPS_VS_POLYIC_12H_BMDC_UP                                |            |                                  |                                  |
| GSE17721_LPS_VS_POLYIC_12H_BMDC_UP                                |            |                                  | 148                              |
| 0.3274653                                                         | 1.3637168  | 0.034907598                      | 0.052026916                      |
| 1                                                                 | 2490       | "tags=28%, list=18%, signal=33%" |                                  |
| GSE17721_PAM3CSK4_VS_CPG_6H_BMDC_DN                               |            |                                  |                                  |
| GSE17721_PAM3CSK4_VS_CPG_6H_BMDC_DN                               |            |                                  | 155                              |
| 0.3265965                                                         | 1.3635514  | 0.023504274                      | 0.052073732                      |
| 1                                                                 | 2579       | "tags=27%, list=18%, signal=33%" |                                  |
| GSE360_CTRL_VS_M_TUBERCULOSIS_DC_UP                               |            |                                  |                                  |
| GSE360_CTRL_VS_M_TUBERCULOSIS_DC_UP                               |            |                                  | 147                              |
| 0.3280979                                                         | 1.3628621  | 0.029288704                      | 0.05240941                       |
| 1                                                                 | 2531       | "tags=34%, list=18%, signal=41%" |                                  |
| GSE16451_CTRL_VS_WEST_EQUINE_ENC_VIRUS_MATURE_NEURON_CELL_LINE_DN |            |                                  |                                  |
| GSE16451_CTRL_VS_WEST_EQUINE_ENC_VIRUS_MATURE_NEURON_CELL_LINE_DN |            |                                  |                                  |
| 148                                                               | 0.32547897 | 1.3624645                        | 0.021231422                      |
| 0.052589484                                                       | 1          | 1234                             | "tags=22%, list=9%, signal=23%"  |
| GSE42021_CD24LO_TREG_VS_CD24LO_TCONV_THYMUS_UP                    |            |                                  |                                  |
| GSE42021_CD24LO_TREG_VS_CD24LO_TCONV_THYMUS_UP                    |            |                                  | 151                              |
| 0.32850134                                                        | 1.3615006  | 0.03640257                       | 0.053057343                      |
| 1                                                                 | 2063       | "tags=26%, list=15%, signal=31%" |                                  |
| GSE17186_BLOOD_VS_CORD_BLOOD_NAIVE_BCELL_DN                       |            |                                  |                                  |
| GSE17186_BLOOD_VS_CORD_BLOOD_NAIVE_BCELL_DN                       |            |                                  | 128                              |
| 0.3328828                                                         | 1.3607996  | 0.022680413                      | 0.053425502                      |
| 1                                                                 | 2060       | "tags=30%, list=15%, signal=34%" |                                  |
| GSE17721_PAM3CSK4_VS_CPG_8H_BMDC_DN                               |            |                                  |                                  |
| GSE17721_PAM3CSK4_VS_CPG_8H_BMDC_DN                               |            |                                  | 164                              |
| 0.32673454                                                        | 1.3605654  | 0.030991735                      | 0.05354087                       |
| 1                                                                 | 2059       | "tags=27%, list=15%, signal=32%" |                                  |
| GSE3203_WT_VS_IFNAR1_KO_INFLUENZA_INFECTED_LN_BCELL_DN            |            |                                  |                                  |
| GSE3203_WT_VS_IFNAR1_KO_INFLUENZA_INFECTED_LN_BCELL_DN            |            |                                  |                                  |
| 132                                                               | 0.33416665 | 1.3602413                        | 0.029473685                      |
| 0.05367336                                                        | 1          | 2249                             | "tags=24%, list=16%, signal=29%" |
| GSE15930_STIM_VS_STIM_AND_TRICHOSTATINA_72H_CD8_T_CELL_UP         |            |                                  |                                  |
| GSE15930_STIM_VS_STIM_AND_TRICHOSTATINA_72H_CD8_T_CELL_UP         |            |                                  |                                  |
| 154                                                               | 0.32461724 | 1.3596879                        | 0.023554605                      |
| 0.053962216                                                       | 1          | 1598                             | "tags=22%, list=11%, signal=25%" |
| GSE34392_ST2_KO_VS_WT_DAY8_LCMV_EFFECTOR_CD8_TCELL_UP             |            |                                  |                                  |
| GSE34392_ST2_KO_VS_WT_DAY8_LCMV_EFFECTOR_CD8_TCELL_UP             |            |                                  |                                  |
| 138                                                               | 0.335405   | 1.3595425                        | 0.03797468                       |
| 1                                                                 | 2091       | "tags=31%, list=15%, signal=36%" | 0.054005828                      |



GSE20198\_IL12\_IL18\_VS\_IFNA\_TREATED\_ACT\_CD4\_TCELL\_UP  
GSE20198\_IL12\_IL18\_VS\_IFNA\_TREATED\_ACT\_CD4\_TCELL\_UP  
131 0.33548936 1.3594977 0.015217391  
0.0539903 1 2364 "tags=32%, list=17%, signal=38%"  
GSE43863\_DAY6\_EFF\_VS\_DAY150\_MEM\_TH1\_CD4\_TCELL\_DN  
GSE43863\_DAY6\_EFF\_VS\_DAY150\_MEM\_TH1\_CD4\_TCELL\_DN 148  
0.32677513 1.3592889 0.024844721 0.054063875  
1 1573 "tags=27%, list=11%, signal=30%"  
GSE21670\_STAT3\_KO\_VS\_WT\_CD4\_TCELL\_IL6\_TREATED\_UP  
GSE21670\_STAT3\_KO\_VS\_WT\_CD4\_TCELL\_IL6\_TREATED\_UP 146  
0.32942787 1.3591871 0.01863354 0.054092336  
1 2850 "tags=34%, list=20%, signal=42%"  
GSE17186\_CD21LOW\_VS\_CD21HIGH\_TRANSITIONAL\_BCELL\_CORD\_BLOOD\_UP  
GSE17186\_CD21LOW\_VS\_CD21HIGH\_TRANSITIONAL\_BCELL\_CORD\_BLOOD\_UP  
145 0.32908243 1.3587582 0.037894737  
0.05427899 1 2521 "tags=36%, list=18%, signal=43%"  
GSE5589\_LPS\_VS\_LPS\_AND\_IL10\_STIM\_IL6\_KO\_MACROPHAGE\_180MIN\_DN  
GSE5589\_LPS\_VS\_LPS\_AND\_IL10\_STIM\_IL6\_KO\_MACROPHAGE\_180MIN\_DN  
138 0.3315438 1.3587383 0.028508771  
0.05425105 1 2539 "tags=28%, list=18%, signal=34%"  
GSE6259\_BCELL\_VS\_CD4\_TCELL\_DN GSE6259\_BCELL\_VS\_CD4\_TCELL\_DN  
137 0.33098966 1.358071 0.024017468  
0.054595172 1 2122 "tags=27%, list=15%, signal=31%"  
GSE32901\_NAIVE\_VS\_TH17\_ENRICHED\_CD4\_TCELL\_DN  
GSE32901\_NAIVE\_VS\_TH17\_ENRICHED\_CD4\_TCELL\_DN 138  
0.3335725 1.3579834 0.035051547 0.054603674  
1 2392 "tags=35%, list=17%, signal=41%"  
GSE37301\_LYMPHOID\_PRIMED\_MPP\_VS\_COMMON\_LYMPHOID\_PROGENITOR\_DN  
GSE37301\_LYMPHOID\_PRIMED\_MPP\_VS\_COMMON\_LYMPHOID\_PROGENITOR\_DN  
162 0.32218552 1.3578827 0.014  
0.054622885 1 2116 "tags=30%, list=15%, signal=34%"  
GSE7460\_CTRL\_VS\_TGFB\_TREATED\_ACT\_TCONV\_UP  
GSE7460\_CTRL\_VS\_TGFB\_TREATED\_ACT\_TCONV\_UP 162  
0.3239413 1.3574786 0.012711864 0.0548174  
1 1947 "tags=26%, list=14%, signal=30%"  
GSE43863\_NAIVE\_VS\_MEMORY\_LY6C\_INT\_CXCR5POS\_CD4\_TCELL\_D150\_LCMV\_DN  
GSE43863\_NAIVE\_VS\_MEMORY\_LY6C\_INT\_CXCR5POS\_CD4\_TCELL\_D150\_LCMV\_DN  
138 0.33103305 1.3574286 0.037117902  
0.054803662 1 1710 "tags=24%, list=12%, signal=27%"  
GSE12392\_WT\_VS\_IFNB\_KO\_CD8A\_NEG\_SPLEEN\_DC\_UP  
GSE12392\_WT\_VS\_IFNB\_KO\_CD8A\_NEG\_SPLEEN\_DC\_UP 149  
0.32296073 1.3567711 0.02296451 0.055159815  
1 2205 "tags=30%, list=16%, signal=35%"  
GSE17721\_LPS\_VS\_PAM3CSK4\_12H\_BMDC\_UP  
GSE17721\_LPS\_VS\_PAM3CSK4\_12H\_BMDC\_UP 159  
0.32418385 1.3565427 0.024096385 0.05524931  
1 1470 "tags=23%, list=10%, signal=26%"  
GSE41176\_WT\_VS\_TAK1\_KO\_ANTI\_IGM\_STIM\_BCELL\_24H\_UP  
GSE41176\_WT\_VS\_TAK1\_KO\_ANTI\_IGM\_STIM\_BCELL\_24H\_UP 146  
0.32918394 1.3561167 0.032467533 0.055448707  
1 2040 "tags=29%, list=14%, signal=33%"  
GSE20198\_IL12\_IL18\_VS\_IFNA\_TREATED\_ACT\_CD4\_TCELL\_DN  
GSE20198\_IL12\_IL18\_VS\_IFNA\_TREATED\_ACT\_CD4\_TCELL\_DN  
142 0.32766336 1.355965 0.03411514 0.05550629

|                                                                      |                                  |                                  |                                  |             |
|----------------------------------------------------------------------|----------------------------------|----------------------------------|----------------------------------|-------------|
| 1                                                                    | 1243                             | "tags=17%, list=9%, signal=18%"  |                                  |             |
| GSE15330_HSC_VS_MEGAKARYOCYTE_ERYTHROID_PROGENITOR_IKAROS_KO_UP      |                                  |                                  |                                  |             |
| GSE15330_HSC_VS_MEGAKARYOCYTE_ERYTHROID_PROGENITOR_IKAROS_KO_UP      |                                  |                                  |                                  |             |
|                                                                      | 156                              | 0.3271561                        | 1.3556265                        | 0.027484143 |
| 0.05567598                                                           | 1                                | 1648                             | "tags=26%, list=12%, signal=29%" |             |
| GSE22886_IGM_MEMORY_BCELL_VS_BM_PLASMA_CELL_DN                       |                                  |                                  |                                  |             |
| GSE22886_IGM_MEMORY_BCELL_VS_BM_PLASMA_CELL_DN                       |                                  |                                  |                                  |             |
|                                                                      |                                  |                                  |                                  | 151         |
| 0.32747534                                                           | 1.3549557                        | 0.014799154                      | 0.05602567                       |             |
| 1                                                                    | 1862                             | "tags=28%, list=13%, signal=32%" |                                  |             |
| GSE27786_LIN_NEG_VS_ERYTHROBLAST_UP                                  |                                  |                                  |                                  |             |
| GSE27786_LIN_NEG_VS_ERYTHROBLAST_UP                                  |                                  |                                  |                                  |             |
|                                                                      |                                  |                                  | 139                              | 0.329311    |
| 1.3543998                                                            | 0.04025424                       | 0.056279205                      | 1                                |             |
| 2798                                                                 | "tags=39%, list=20%, signal=48%" |                                  |                                  |             |
| GSE45365_WT_VS_IFNAR_KO_CD8A_DC_MCMV_INFECTIION_UP                   |                                  |                                  |                                  |             |
| GSE45365_WT_VS_IFNAR_KO_CD8A_DC_MCMV_INFECTIION_UP                   |                                  |                                  |                                  |             |
|                                                                      |                                  |                                  |                                  | 134         |
| 0.33047175                                                           | 1.3542986                        | 0.03655914                       | 0.05630764                       |             |
| 1                                                                    | 2613                             | "tags=33%, list=19%, signal=40%" |                                  |             |
| GSE37416_CTRL_VS_3H_F_TULARENSIS_LVS_NEUTROPHIL_UP                   |                                  |                                  |                                  |             |
| GSE37416_CTRL_VS_3H_F_TULARENSIS_LVS_NEUTROPHIL_UP                   |                                  |                                  |                                  |             |
|                                                                      |                                  |                                  |                                  | 119         |
| 0.33714828                                                           | 1.3539906                        | 0.04255319                       | 0.056432918                      |             |
| 1                                                                    | 2486                             | "tags=34%, list=18%, signal=40%" |                                  |             |
| GSE9509_LPS_VS_LPS_AND_IL10_STIM_IL10_KO_MACROPHAGE_10MIN_DN         |                                  |                                  |                                  |             |
| GSE9509_LPS_VS_LPS_AND_IL10_STIM_IL10_KO_MACROPHAGE_10MIN_DN         |                                  |                                  |                                  |             |
|                                                                      | 143                              | 0.32900727                       | 1.3534561                        | 0.03773585  |
| 0.0567041                                                            | 1                                | 2963                             | "tags=40%, list=21%, signal=50%" |             |
| GSE7460_CTRL_VS_TGFB_TREATED_ACT_FOXP3_HET_TCONV_UP                  |                                  |                                  |                                  |             |
| GSE7460_CTRL_VS_TGFB_TREATED_ACT_FOXP3_HET_TCONV_UP                  |                                  |                                  |                                  |             |
| 145                                                                  | 0.3292112                        | 1.3530362                        | 0.020283977                      |             |
| 0.056902472                                                          | 1                                | 2768                             | "tags=34%, list=20%, signal=42%" |             |
| GSE1460_CORD_VS_ADULT_BLOOD_NAIVE_CD4_TCELL_UP                       |                                  |                                  |                                  |             |
| GSE1460_CORD_VS_ADULT_BLOOD_NAIVE_CD4_TCELL_UP                       |                                  |                                  |                                  |             |
|                                                                      |                                  |                                  |                                  | 130         |
| 0.33259735                                                           | 1.3524603                        | 0.025477707                      | 0.057202414                      |             |
| 1                                                                    | 1579                             | "tags=23%, list=11%, signal=26%" |                                  |             |
| GSE26030_TH1_VS_TH17_DAY5_POST_POLARIZATION_DN                       |                                  |                                  |                                  |             |
| GSE26030_TH1_VS_TH17_DAY5_POST_POLARIZATION_DN                       |                                  |                                  |                                  |             |
|                                                                      |                                  |                                  |                                  | 151         |
| 0.32401037                                                           | 1.3514868                        | 0.023206752                      | 0.057724886                      |             |
| 1                                                                    | 1082                             | "tags=18%, list=8%, signal=19%"  |                                  |             |
| GSE26495_PD1HIGH_VS_PD1LOW_CD8_TCELL_DN                              |                                  |                                  |                                  |             |
| GSE26495_PD1HIGH_VS_PD1LOW_CD8_TCELL_DN                              |                                  |                                  |                                  |             |
|                                                                      |                                  |                                  |                                  | 110         |
| 0.34212673                                                           | 1.3513185                        | 0.052516412                      | 0.057787463                      |             |
| 1                                                                    | 817                              | "tags=14%, list=6%, signal=14%"  |                                  |             |
| GSE11864_CSF1_IFNG_VS_CSF1_IFNG_PAM3CYS_IN_MAC_UP                    |                                  |                                  |                                  |             |
| GSE11864_CSF1_IFNG_VS_CSF1_IFNG_PAM3CYS_IN_MAC_UP                    |                                  |                                  |                                  |             |
|                                                                      |                                  |                                  |                                  | 137         |
| 0.32576686                                                           | 1.3512118                        | 0.034764826                      | 0.05782659                       |             |
| 1                                                                    | 2093                             | "tags=28%, list=15%, signal=33%" |                                  |             |
| GSE37533_PPARG2_FOXP3_VS_FOXP3_TRANSDUCED_CD4_TCELL_PIOGLITAZONE_TRE |                                  |                                  |                                  |             |
| ATED_DN                                                              |                                  |                                  |                                  |             |
| GSE37533_PPARG2_FOXP3_VS_FOXP3_TRANSDUCED_CD4_TCELL_PIOGLITAZONE_TRE |                                  |                                  |                                  |             |
| ATED_DN                                                              |                                  |                                  |                                  |             |
|                                                                      | 143                              | 0.33030432                       | 1.350874                         | 0.030800821 |
| 0.057986528                                                          | 1                                | 2108                             | "tags=27%, list=15%, signal=31%" |             |
| GSE339_CD4POS_VS_CD4CD8DN_DC_UP                                      |                                  |                                  |                                  |             |
| GSE339_CD4POS_VS_CD4CD8DN_DC_UP                                      |                                  |                                  |                                  |             |
|                                                                      | 157                              | 0.32743293                       | 1.3504169                        | 0.025104603 |
| 0.058199912                                                          | 1                                | 2090                             | "tags=24%, list=15%, signal=28%" |             |
| GSE37301_LYMPHOID_PRIMED_MPP_VS_PRO_BCELL_UP                         |                                  |                                  |                                  |             |

|                                                                   |                                  |                                  |                                  |             |
|-------------------------------------------------------------------|----------------------------------|----------------------------------|----------------------------------|-------------|
| GSE37301_LYMPHOID_PRIMED_MPP_VS_PRO_BCELL_UP                      |                                  |                                  |                                  | 145         |
| 0.3223583                                                         | 1.3494142                        | 0.01923077                       | 0.058778796                      |             |
| 1                                                                 | 2369                             | "tags=32%, list=17%, signal=39%" |                                  |             |
| GSE9988_LOW_LPS_VS_CTRL_TREATED_MONOCYTE_DN                       |                                  |                                  |                                  | 134         |
| GSE9988_LOW_LPS_VS_CTRL_TREATED_MONOCYTE_DN                       |                                  |                                  |                                  | 134         |
| 0.33654246                                                        | 1.3493314                        | 0.023504274                      | 0.058787245                      |             |
| 1                                                                 | 2638                             | "tags=33%, list=19%, signal=40%" |                                  |             |
| GSE32255_UNSTIM_VS_4H_LPS_STIM_DC_DN                              |                                  |                                  |                                  | 112         |
| GSE32255_UNSTIM_VS_4H_LPS_STIM_DC_DN                              |                                  |                                  |                                  | 112         |
| 0.34137234                                                        | 1.3483356                        | 0.03550296                       | 0.059358902                      |             |
| 1                                                                 | 2783                             | "tags=33%, list=20%, signal=41%" |                                  |             |
| GSE19825_NAIVE_VS_IL2RALOW_DAY3_EFF_CD8_TCELL_DN                  |                                  |                                  |                                  | 136         |
| GSE19825_NAIVE_VS_IL2RALOW_DAY3_EFF_CD8_TCELL_DN                  |                                  |                                  |                                  | 136         |
| 0.329733                                                          | 1.3474052                        | 0.036659878                      | 0.059883427                      | 1           |
| 2325                                                              | "tags=31%, list=16%, signal=37%" |                                  |                                  |             |
| GSE12845_IGD_NEG_BLOOD_VS_PRE_GC_TONSIL_BCELL_UP                  |                                  |                                  |                                  | 145         |
| GSE12845_IGD_NEG_BLOOD_VS_PRE_GC_TONSIL_BCELL_UP                  |                                  |                                  |                                  | 145         |
| 0.32562575                                                        | 1.3473967                        | 0.021929825                      | 0.059846524                      |             |
| 1                                                                 | 2143                             | "tags=30%, list=15%, signal=35%" |                                  |             |
| GSE24634_IL4_VS_CTRL_TREATED_NAIVE_CD4_TCELL_DAY10_DN             |                                  |                                  |                                  |             |
| GSE24634_IL4_VS_CTRL_TREATED_NAIVE_CD4_TCELL_DAY10_DN             |                                  |                                  |                                  |             |
| 154                                                               | 0.32683527                       | 1.3473072                        | 0.029748283                      |             |
| 0.05986008                                                        | 1                                | 1903                             | "tags=23%, list=13%, signal=27%" |             |
| GSE32423_IL7_VS_IL4_MEMORY_CD8_TCELL_UP                           |                                  |                                  |                                  | 136         |
| GSE32423_IL7_VS_IL4_MEMORY_CD8_TCELL_UP                           |                                  |                                  |                                  | 136         |
| 0.33185485                                                        | 1.3471044                        | 0.03846154                       | 0.059927493                      |             |
| 1                                                                 | 1805                             | "tags=24%, list=13%, signal=27%" |                                  |             |
| GSE27786_LSK_VS_CD4_TCELL_UP                                      |                                  |                                  |                                  |             |
| GSE27786_LSK_VS_CD4_TCELL_UP                                      |                                  |                                  |                                  |             |
| 140                                                               | 0.3274854                        | 1.3466609                        | 0.041753653                      |             |
| 0.060158458                                                       | 1                                | 2074                             | "tags=22%, list=15%, signal=26%" |             |
| GSE339_CD8POS_VS_CD4CD8DN_DC_UP                                   |                                  |                                  |                                  |             |
| GSE339_CD8POS_VS_CD4CD8DN_DC_UP                                   |                                  |                                  |                                  |             |
| 159                                                               | 0.32100523                       | 1.346603                         | 0.024793388                      |             |
| 0.060151808                                                       | 1                                | 2322                             | "tags=36%, list=16%, signal=42%" |             |
| GSE20151_CTRL_VS_FUSOBACT_NUCLEATUM_NEUTROPHIL_DN                 |                                  |                                  |                                  | 146         |
| GSE20151_CTRL_VS_FUSOBACT_NUCLEATUM_NEUTROPHIL_DN                 |                                  |                                  |                                  | 146         |
| 0.32870185                                                        | 1.3455671                        | 0.023952097                      | 0.06074213                       |             |
| 1                                                                 | 2416                             | "tags=33%, list=17%, signal=39%" |                                  |             |
| GSE1432_1H_VS_6H_IFNG_MICROGLIA_UP                                |                                  |                                  |                                  |             |
| GSE1432_1H_VS_6H_IFNG_MICROGLIA_UP                                |                                  |                                  |                                  |             |
| 0.32653353                                                        | 1.3454                           | 0.03131524                       | 0.06079966                       | 1           |
| 2047                                                              | "tags=24%, list=15%, signal=28%" |                                  |                                  |             |
| GSE5589_LPS_VS_LPS_AND_IL6_STIM_IL6_KO_MACROPHAGE_45MIN_DN        |                                  |                                  |                                  |             |
| GSE5589_LPS_VS_LPS_AND_IL6_STIM_IL6_KO_MACROPHAGE_45MIN_DN        |                                  |                                  |                                  |             |
| 155                                                               | 0.320341                         | 1.3452244                        | 0.019650655                      | 0.060850855 |
| 1                                                                 | 1665                             | "tags=25%, list=12%, signal=27%" |                                  |             |
| GSE21927_BALBC_VS_C57BL6_MONOCYTE_TUMOR_DN                        |                                  |                                  |                                  | 104         |
| GSE21927_BALBC_VS_C57BL6_MONOCYTE_TUMOR_DN                        |                                  |                                  |                                  | 104         |
| 0.33877364                                                        | 1.3449508                        | 0.035051547                      | 0.060972206                      |             |
| 1                                                                 | 2404                             | "tags=30%, list=17%, signal=36%" |                                  |             |
| GSE23114_WT_VS_SLE2C1_MOUSE_SPLEEN_B1A_BCELL_DN                   |                                  |                                  |                                  | 153         |
| GSE23114_WT_VS_SLE2C1_MOUSE_SPLEEN_B1A_BCELL_DN                   |                                  |                                  |                                  | 153         |
| 0.32389227                                                        | 1.3447039                        | 0.02603037                       | 0.06109978                       |             |
| 1                                                                 | 2205                             | "tags=27%, list=16%, signal=31%" |                                  |             |
| GSE19941_IL10_KO_VS_IL10_KO_AND_NFKBP50_KO_LPS_STIM_MACROPHAGE_UP |                                  |                                  |                                  |             |

GSE19941\_IL10\_KO\_VS\_IL10\_KO\_AND\_NFKBP50\_KO\_LPS\_STIM\_MACROPHAGE\_UP  
154 0.323937 1.3446598 0.034632035  
0.061086934 1 2572 "tags=29%, list=18%, signal=35%"  
GSE42724\_MEMORY\_BCELL\_VS\_PLASMABLAST\_DN  
GSE42724\_MEMORY\_BCELL\_VS\_PLASMABLAST\_DN 146  
0.31985825 1.3444692 0.035940804 0.06117921  
1 2402 "tags=34%, list=17%, signal=40%"  
GSE36009\_UNSTIM\_VS\_LPS\_STIM\_NLRP10\_KO\_DC\_UP  
GSE36009\_UNSTIM\_VS\_LPS\_STIM\_NLRP10\_KO\_DC\_UP 148  
0.3186754 1.3444192 0.026923077 0.061175875  
1 1593 "tags=22%, list=11%, signal=24%"  
GSE11864\_CSF1\_IFNG\_VS\_CSF1\_IFNG\_PAM3CYS\_IN\_MAC\_DN  
GSE11864\_CSF1\_IFNG\_VS\_CSF1\_IFNG\_PAM3CYS\_IN\_MAC\_DN 142  
0.32716218 1.3434968 0.023655914 0.06169967  
1 2269 "tags=25%, list=16%, signal=30%"  
GSE17721\_PAM3CSK4\_VS\_CPG\_8H\_BMDC\_UP  
GSE17721\_PAM3CSK4\_VS\_CPG\_8H\_BMDC\_UP 145  
0.32675532 1.3433678 0.038961038 0.061731566  
1 2347 "tags=31%, list=17%, signal=37%"  
GSE22886\_NAIVE\_CD8\_TCELL\_VS\_MEMORY\_TCELL\_DN  
GSE22886\_NAIVE\_CD8\_TCELL\_VS\_MEMORY\_TCELL\_DN 154  
0.32122913 1.3425856 0.016913319 0.06216778  
1 1313 "tags=21%, list=9%, signal=23%"  
GSE17721\_0.5H\_VS\_8H\_GARDIQUIMOD\_BMDC\_DN  
GSE17721\_0.5H\_VS\_8H\_GARDIQUIMOD\_BMDC\_DN 158 0.327884  
1.3421534 0.037656903 0.062421605 1  
2754 "tags=37%, list=20%, signal=45%"  
GSE41176\_WT\_VS\_TAK1\_KO\_ANTI\_IGM\_STIM\_BCELL\_24H\_DN  
GSE41176\_WT\_VS\_TAK1\_KO\_ANTI\_IGM\_STIM\_BCELL\_24H\_DN 130  
0.3299337 1.341442 0.04821803 0.06286242 1  
2250 "tags=30%, list=16%, signal=35%"  
GSE22919\_RESTING\_VS\_IL2\_IL12\_IL15\_STIM\_NK\_CELL\_UP  
GSE22919\_RESTING\_VS\_IL2\_IL12\_IL15\_STIM\_NK\_CELL\_UP 146  
0.3249997 1.3397154 0.03050109 0.06396166  
1 2654 "tags=36%, list=19%, signal=43%"  
GSE13485\_CTRL\_VS\_DAY7\_YF17D\_VACCINE\_PBMC\_DN  
GSE13485\_CTRL\_VS\_DAY7\_YF17D\_VACCINE\_PBMC\_DN 138  
0.33014372 1.3396363 0.035051547 0.06396996  
1 1208 "tags=22%, list=9%, signal=24%"  
GSE36527\_CD69\_NEG\_VS\_POS\_TREG\_CD62L\_LOS\_KLRG1\_NEG\_DN  
GSE36527\_CD69\_NEG\_VS\_POS\_TREG\_CD62L\_LOS\_KLRG1\_NEG\_DN  
148 0.32367718 1.3396263 0.040816326  
0.063932374 1 1429 "tags=23%, list=10%, signal=25%"  
GSE26488\_CTRL\_VS\_PEPTIDE\_INJECTION\_HDAC7\_DELTAP\_TG\_OT2\_THYMOCYTE\_UP  
GSE26488\_CTRL\_VS\_PEPTIDE\_INJECTION\_HDAC7\_DELTAP\_TG\_OT2\_THYMOCYTE\_UP  
165 0.31741253 1.3395619 0.022222223  
0.06393821 1 1995 "tags=19%, list=14%, signal=22%"  
GSE17721\_CTRL\_VS\_CPG\_4H\_BMDC\_UP GSE17721\_CTRL\_VS\_CPG\_4H\_BMDC\_UP  
153 0.32136935 1.3390026 0.02631579  
0.06425539 1 2242 "tags=33%, list=16%, signal=39%"  
GSE17721\_0.5H\_VS\_4H\_PAM3CSK4\_BMDC\_UP  
GSE17721\_0.5H\_VS\_4H\_PAM3CSK4\_BMDC\_UP 153  
0.3208677 1.3383684 0.022522522 0.064599425  
1 2801 "tags=35%, list=20%, signal=43%"

|                                                                      |                                  |                                  |                                  |                                  |
|----------------------------------------------------------------------|----------------------------------|----------------------------------|----------------------------------|----------------------------------|
| GSE17721_12H_VS_24H_GARDIQUIMOD_BMDC_DN                              |                                  |                                  |                                  |                                  |
| GSE17721_12H_VS_24H_GARDIQUIMOD_BMDC_DN                              |                                  |                                  | 146                              |                                  |
| 0.32517618                                                           | 1.33834                          | 0.018329939                      | 0.06457574                       | 1                                |
| 1395                                                                 | "tags=24%, list=10%, signal=26%" |                                  |                                  |                                  |
| GSE10239_KLRG1INT_VS_KLRG1HIGH_EFF_CD8_TCELL_UP                      |                                  |                                  |                                  |                                  |
| GSE10239_KLRG1INT_VS_KLRG1HIGH_EFF_CD8_TCELL_UP                      |                                  |                                  |                                  | 140                              |
| 0.32633278                                                           | 1.3382632                        | 0.04192872                       | 0.06457811                       |                                  |
| 1                                                                    | 2620                             | "tags=32%, list=19%, signal=39%" |                                  |                                  |
| GSE25088_WT_VS_STAT6_KO_MACROPHAGE_IL4_STIM_UP                       |                                  |                                  |                                  |                                  |
| GSE25088_WT_VS_STAT6_KO_MACROPHAGE_IL4_STIM_UP                       |                                  |                                  |                                  | 140                              |
| 0.33023283                                                           | 1.3380494                        | 0.033472802                      | 0.0646584                        |                                  |
| 1                                                                    | 1820                             | "tags=21%, list=13%, signal=24%" |                                  |                                  |
| GSE5542_UNTREATED_VS_IFNG_TREATED_EPITHELIAL_CELLS_6H_UP             |                                  |                                  |                                  |                                  |
| GSE5542_UNTREATED_VS_IFNG_TREATED_EPITHELIAL_CELLS_6H_UP             |                                  |                                  |                                  |                                  |
| 128                                                                  | 0.33235756                       | 1.3378824                        | 0.029535865                      |                                  |
| 0.06472117                                                           | 1                                | 2108                             | "tags=24%, list=15%, signal=28%" |                                  |
| GSE40274_CTRL_VS_FOXP3_AND_EOS_TRANSDUCE_ACTIVATED_CD4_TCELL_UP      |                                  |                                  |                                  |                                  |
| GSE40274_CTRL_VS_FOXP3_AND_EOS_TRANSDUCE_ACTIVATED_CD4_TCELL_UP      |                                  |                                  |                                  |                                  |
|                                                                      | 135                              | 0.32905814                       | 1.3377693                        | 0.032258064                      |
| 0.06474312                                                           | 1                                | 2395                             | "tags=28%, list=17%, signal=34%" |                                  |
| GSE7568_IL4_TGFB_DEXAMETHASONE_VS_IL4_TGFB_TREATED_MACROPHAGE_DN     |                                  |                                  |                                  |                                  |
| GSE7568_IL4_TGFB_DEXAMETHASONE_VS_IL4_TGFB_TREATED_MACROPHAGE_DN     |                                  |                                  |                                  |                                  |
|                                                                      | 139                              | 0.32299304                       | 1.3376864                        | 0.041152265                      |
| 0.064750224                                                          | 1                                | 2555                             | "tags=35%, list=18%, signal=43%" |                                  |
| GSE15659_CD45RA_NEG_CD4_TCELL_VS_ACTIVATED_TREG_DN                   |                                  |                                  |                                  |                                  |
| GSE15659_CD45RA_NEG_CD4_TCELL_VS_ACTIVATED_TREG_DN                   |                                  |                                  |                                  | 134                              |
| 0.32938588                                                           | 1.3370812                        | 0.038306452                      | 0.06506899                       |                                  |
| 1                                                                    | 1717                             | "tags=20%, list=12%, signal=23%" |                                  |                                  |
| GSE22589_HEALTHY_VS_HIV_AND_SIV_INFECTED_DC_DN                       |                                  |                                  |                                  |                                  |
| GSE22589_HEALTHY_VS_HIV_AND_SIV_INFECTED_DC_DN                       |                                  |                                  |                                  | 144                              |
| 0.32692632                                                           | 1.3368928                        | 0.03305785                       | 0.065152206                      |                                  |
| 1                                                                    | 1901                             | "tags=25%, list=13%, signal=29%" |                                  |                                  |
| GSE12845_IGD_POS_BLOOD_VS_NAIVE_TONSIL_BCELL_DN                      |                                  |                                  |                                  |                                  |
| GSE12845_IGD_POS_BLOOD_VS_NAIVE_TONSIL_BCELL_DN                      |                                  |                                  |                                  | 132                              |
| 0.3282069                                                            | 1.3367176                        | 0.03930131                       | 0.065231614                      |                                  |
| 1                                                                    | 1296                             | "tags=22%, list=9%, signal=24%"  |                                  |                                  |
| GSE17580_TREG_VS_TEFF_S_MANSONI_INF_UP                               |                                  |                                  |                                  |                                  |
| GSE17580_TREG_VS_TEFF_S_MANSONI_INF_UP                               |                                  |                                  |                                  | 168                              |
| 0.3156776                                                            | 1.3358655                        | 0.030487806                      | 0.06574245                       |                                  |
| 1                                                                    | 1580                             | "tags=26%, list=11%, signal=29%" |                                  |                                  |
| GSE16451_IMMATURE_VS_MATURE_NEURON_CELL_LINE_WEST_EQUINE_ENC_VIRUS_D |                                  |                                  |                                  |                                  |
| N                                                                    |                                  |                                  |                                  |                                  |
| GSE16451_IMMATURE_VS_MATURE_NEURON_CELL_LINE_WEST_EQUINE_ENC_VIRUS_D |                                  |                                  |                                  |                                  |
| N                                                                    | 160                              | 0.32306728                       | 1.3357538                        |                                  |
| 0.021782178                                                          | 0.06576041                       | 1                                | 1596                             | "tags=23%, list=11%, signal=26%" |
| GSE27786_LSK_VS_ERYTHROBLAST_DN                                      |                                  |                                  |                                  |                                  |
| GSE27786_LSK_VS_ERYTHROBLAST_DN                                      |                                  |                                  |                                  |                                  |
|                                                                      | 133                              | 0.3247654                        | 1.3356694                        | 0.02834008                       |
| 0.0657737                                                            | 1                                | 1668                             | "tags=18%, list=12%, signal=20%" |                                  |
| GSE369_SOCS3_KO_VS_WT_LIVER_UP                                       |                                  |                                  |                                  |                                  |
| GSE369_SOCS3_KO_VS_WT_LIVER_UP                                       |                                  |                                  |                                  |                                  |
|                                                                      | 146                              | 0.3221498                        | 1.3354968                        | 0.041431263                      |
| 0.06583534                                                           | 1                                | 2253                             | "tags=32%, list=16%, signal=38%" |                                  |
| GSE45365_NK_CELL_VS_CD11B_DC_MCMV_INFECTON_UP                        |                                  |                                  |                                  |                                  |
| GSE45365_NK_CELL_VS_CD11B_DC_MCMV_INFECTON_UP                        |                                  |                                  |                                  | 146                              |

|                                                                |                                  |                                  |             |
|----------------------------------------------------------------|----------------------------------|----------------------------------|-------------|
| 0.31965244                                                     | 1.3345338                        | 0.032128513                      | 0.06640196  |
| 1                                                              | 2870                             | "tags=30%, list=20%, signal=37%" |             |
| GSE2706_LPS_VS_R848_AND_LPS_2H_STIM_DC_UP                      |                                  |                                  |             |
| GSE2706_LPS_VS_R848_AND_LPS_2H_STIM_DC_UP                      |                                  |                                  |             |
| 0.33429787                                                     | 1.3339987                        | 0.042735044                      | 0.06672602  |
| 1                                                              | 1799                             | "tags=19%, list=13%, signal=22%" |             |
| GSE22103_UNSTIM_VS_LPS_STIM_NEUTROPHIL_UP                      |                                  |                                  |             |
| GSE22103_UNSTIM_VS_LPS_STIM_NEUTROPHIL_UP                      |                                  |                                  |             |
| 0.3176817                                                      | 1.333893                         | 0.035643563                      | 0.066751696 |
| 2149                                                           | "tags=30%, list=15%, signal=36%" |                                  |             |
| GSE3982_NEUTROPHIL_VS_BASOPHIL_DN                              |                                  |                                  |             |
| GSE3982_NEUTROPHIL_VS_BASOPHIL_DN                              |                                  |                                  |             |
| 0.066914715                                                    | 1                                | 2416                             | 0.03245436  |
| "tags=31%, list=17%, signal=37%"                               |                                  |                                  |             |
| GSE43955_TGFB_IL6_VS_TGFB_IL6_IL23_TH17_ACT_CD4_TCELL_60H_UP   |                                  |                                  |             |
| GSE43955_TGFB_IL6_VS_TGFB_IL6_IL23_TH17_ACT_CD4_TCELL_60H_UP   |                                  |                                  |             |
| 0.0670709                                                      | 1                                | 1964                             | 0.03125     |
| "tags=24%, list=14%, signal=28%"                               |                                  |                                  |             |
| GSE46606_IRF4HIGH_VS_WT_CD40L_IL2_IL5_DAY3_STIMULATED_BCELL_DN |                                  |                                  |             |
| GSE46606_IRF4HIGH_VS_WT_CD40L_IL2_IL5_DAY3_STIMULATED_BCELL_DN |                                  |                                  |             |
| 0.06715485                                                     | 1                                | 1873                             | 0.0397351   |
| "tags=24%, list=13%, signal=28%"                               |                                  |                                  |             |
| GSE43955_1H_VS_20H_ACT_CD4_TCELL_UP                            |                                  |                                  |             |
| GSE43955_1H_VS_20H_ACT_CD4_TCELL_UP                            |                                  |                                  |             |
| 0.31758428                                                     | 1.3330088                        | 0.04208417                       | 0.0671415   |
| 1                                                              | 2394                             | "tags=32%, list=17%, signal=38%" |             |
| GSE20715_WT_VS_TLR4_KO_LUNG_UP                                 |                                  |                                  |             |
| GSE20715_WT_VS_TLR4_KO_LUNG_UP                                 |                                  |                                  |             |
| 0.06714135                                                     | 1                                | 2321                             | 0.042918455 |
| "tags=29%, list=16%, signal=34%"                               |                                  |                                  |             |
| GSE43260_BTTLA_POS_VS_NEG_INTRATUMORAL_CD8_TCELL_DN            |                                  |                                  |             |
| GSE43260_BTTLA_POS_VS_NEG_INTRATUMORAL_CD8_TCELL_DN            |                                  |                                  |             |
| 0.3286797                                                      | 1.3315938                        | 0.029288704                      | 0.06803087  |
| 1                                                              | 2789                             | "tags=34%, list=20%, signal=42%" |             |
| GSE6674_ANTI_IGM_VS_ANTI_IGM_AND_CPG_STIM_BCELL_UP             |                                  |                                  |             |
| GSE6674_ANTI_IGM_VS_ANTI_IGM_AND_CPG_STIM_BCELL_UP             |                                  |                                  |             |
| 0.32839447                                                     | 1.331122                         | 0.027484143                      | 0.06828075  |
| 2059                                                           | "tags=31%, list=15%, signal=36%" |                                  |             |
| GSE5503_LIVER_DC_VS_SPLEEN_DC_ACTIVATED_ALLOGENIC_TCELL_DN     |                                  |                                  |             |
| GSE5503_LIVER_DC_VS_SPLEEN_DC_ACTIVATED_ALLOGENIC_TCELL_DN     |                                  |                                  |             |
| 0.068474144                                                    | 1                                | 2408                             | 0.048523206 |
| "tags=30%, list=17%, signal=36%"                               |                                  |                                  |             |
| GSE29618_MONOCYTE_VS_PDC_UP                                    |                                  |                                  |             |
| GSE29618_MONOCYTE_VS_PDC_UP                                    |                                  |                                  |             |
| 0.06851205                                                     | 1                                | 1428                             | 0.036324788 |
| "tags=23%, list=10%, signal=25%"                               |                                  |                                  |             |
| GSE26890_CXCR1_NEG_VS_POS_EFFECTOR_CD8_TCELL_DN                |                                  |                                  |             |
| GSE26890_CXCR1_NEG_VS_POS_EFFECTOR_CD8_TCELL_DN                |                                  |                                  |             |
| 0.3230367                                                      | 1.3302798                        | 0.04233871                       | 0.06871426  |
| 1                                                              | 595                              | "tags=15%, list=4%, signal=15%"  |             |
| GSE43955_1H_VS_10H_ACT_CD4_TCELL_WITH_TGFB_IL6_UP              |                                  |                                  |             |
| GSE43955_1H_VS_10H_ACT_CD4_TCELL_WITH_TGFB_IL6_UP              |                                  |                                  |             |
| 0.32000703                                                     | 1.3295982                        | 0.0385439                        | 0.069115415 |
| 1                                                              | 2676                             | "tags=33%, list=19%, signal=41%" |             |
| GSE15930_STIM_VS_STIM_AND_IFNAB_24H_CD8_T_CELL_UP              |                                  |                                  |             |
| GSE15930_STIM_VS_STIM_AND_IFNAB_24H_CD8_T_CELL_UP              |                                  |                                  |             |
| 0.31232354                                                     | 1.3287348                        | 0.023758098                      | 0.06965859  |

|                                                                 |                                                                 |                                  |                                  |             |
|-----------------------------------------------------------------|-----------------------------------------------------------------|----------------------------------|----------------------------------|-------------|
| 1                                                               | 1865                                                            | "tags=25%, list=13%, signal=28%" |                                  |             |
| GSE17721_0.5H_VS_8H_LPS_BMDC_DN                                 | GSE17721_0.5H_VS_8H_LPS_BMDC_DN                                 |                                  |                                  |             |
|                                                                 | 150                                                             | 0.32105055                       | 1.3277823                        | 0.054393306 |
| 0.07020864                                                      | 1                                                               | 1618                             | "tags=22%, list=11%, signal=25%" |             |
| GSE17721_PAM3CSK4_VS_CPG_24H_BMDC_DN                            | GSE17721_PAM3CSK4_VS_CPG_24H_BMDC_DN                            |                                  |                                  |             |
|                                                                 |                                                                 |                                  | 153                              |             |
| 0.31596816                                                      | 1.3272134                                                       | 0.04106776                       | 0.07053794                       |             |
| 1                                                               | 2612                                                            | "tags=33%, list=19%, signal=40%" |                                  |             |
| GSE25677_MPL_VS_R848_STIM_BCELL_DN                              | GSE25677_MPL_VS_R848_STIM_BCELL_DN                              |                                  |                                  |             |
|                                                                 |                                                                 |                                  | 142                              |             |
| 0.3203891                                                       | 1.3270655                                                       | 0.036659878                      | 0.07059817                       |             |
| 1                                                               | 2374                                                            | "tags=35%, list=17%, signal=42%" |                                  |             |
| GSE9006_HEALTHY_VS_TYPE_1_DIABETES_PBMC_AT_DX_DN                | GSE9006_HEALTHY_VS_TYPE_1_DIABETES_PBMC_AT_DX_DN                |                                  |                                  |             |
|                                                                 |                                                                 |                                  | 140                              |             |
| 0.32179484                                                      | 1.3269922                                                       | 0.0332681                        | 0.07060811                       |             |
| 1                                                               | 1223                                                            | "tags=18%, list=9%, signal=19%"  |                                  |             |
| GSE360_T_GONDII_VS_B_MALAYI_LOW_DOSE_DC_DN                      | GSE360_T_GONDII_VS_B_MALAYI_LOW_DOSE_DC_DN                      |                                  |                                  |             |
|                                                                 |                                                                 |                                  | 152                              |             |
| 0.31687838                                                      | 1.3261728                                                       | 0.037037037                      | 0.07112269                       |             |
| 1                                                               | 1883                                                            | "tags=25%, list=13%, signal=29%" |                                  |             |
| GSE16385_MONOCYTE_VS_MACROPHAGE_UP                              | GSE16385_MONOCYTE_VS_MACROPHAGE_UP                              |                                  |                                  |             |
|                                                                 |                                                                 |                                  | 142                              |             |
| 0.32356608                                                      | 1.326063                                                        | 0.021186441                      | 0.07114911                       | 1           |
| 1265                                                            | "tags=16%, list=9%, signal=18%"                                 |                                  |                                  |             |
| GSE40666_WT_VS_STAT4_KO_CD8_TCELL_WITH_IFNA_STIM_90MIN_DN       | GSE40666_WT_VS_STAT4_KO_CD8_TCELL_WITH_IFNA_STIM_90MIN_DN       |                                  |                                  |             |
|                                                                 |                                                                 |                                  |                                  |             |
| 155                                                             | 0.3152129                                                       | 1.3260213                        | 0.036679536                      |             |
| 0.071128584                                                     | 1                                                               | 984                              | "tags=18%, list=7%, signal=19%"  |             |
| GSE43863_NAIVE_VS_MEMORY_TFH_CD4_TCELL_D150_LCMV_DN             | GSE43863_NAIVE_VS_MEMORY_TFH_CD4_TCELL_D150_LCMV_DN             |                                  |                                  |             |
|                                                                 |                                                                 |                                  |                                  |             |
| 147                                                             | 0.31659108                                                      | 1.3258444                        | 0.036217302                      |             |
| 0.0711999                                                       | 1                                                               | 2229                             | "tags=28%, list=16%, signal=33%" |             |
| GSE39820_TGFBETA1_VS_TGFBETA3_IN_IL6_IL23A_TREATED_CD4_TCELL_UP | GSE39820_TGFBETA1_VS_TGFBETA3_IN_IL6_IL23A_TREATED_CD4_TCELL_UP |                                  |                                  |             |
|                                                                 |                                                                 |                                  |                                  |             |
|                                                                 | 135                                                             | 0.3275108                        | 1.3257753                        | 0.028688524 |
| 0.071196385                                                     | 1                                                               | 2278                             | "tags=29%, list=16%, signal=34%" |             |
| GSE9988_ANTI_TREM1_VS_CTRL_TREATED_MONOCYTES_DN                 | GSE9988_ANTI_TREM1_VS_CTRL_TREATED_MONOCYTES_DN                 |                                  |                                  |             |
|                                                                 |                                                                 |                                  | 138                              |             |
| 0.32518667                                                      | 1.3250923                                                       | 0.054166667                      | 0.071626954                      |             |
| 1                                                               | 2520                                                            | "tags=34%, list=18%, signal=41%" |                                  |             |
| GSE18791_CTRL_VS_NEWCASTLE_VIRUS_DC_6H_UP                       | GSE18791_CTRL_VS_NEWCASTLE_VIRUS_DC_6H_UP                       |                                  |                                  |             |
|                                                                 |                                                                 |                                  | 123                              |             |
| 0.32851017                                                      | 1.3248644                                                       | 0.051282052                      | 0.071737155                      |             |
| 1                                                               | 2282                                                            | "tags=28%, list=16%, signal=34%" |                                  |             |
| GSE45739_UNSTIM_VS_ACD3_ACD28_STIM_WT_CD4_TCELL_DN              | GSE45739_UNSTIM_VS_ACD3_ACD28_STIM_WT_CD4_TCELL_DN              |                                  |                                  |             |
|                                                                 |                                                                 |                                  | 145                              |             |
| 0.31921512                                                      | 1.3247539                                                       | 0.042735044                      | 0.071763985                      |             |
| 1                                                               | 2041                                                            | "tags=31%, list=14%, signal=36%" |                                  |             |
| GSE27786_LIN_NEG_VS_CD4_TCELL_UP                                | GSE27786_LIN_NEG_VS_CD4_TCELL_UP                                |                                  |                                  |             |
|                                                                 |                                                                 |                                  |                                  |             |
|                                                                 | 143                                                             | 0.3205618                        | 1.3239543                        | 0.041753653 |
| 0.07225501                                                      | 1                                                               | 1972                             | "tags=22%, list=14%, signal=25%" |             |
| GSE17721_POLYIC_VS_GARDIQUIMOD_12H_BMDC_DN                      | GSE17721_POLYIC_VS_GARDIQUIMOD_12H_BMDC_DN                      |                                  |                                  |             |
|                                                                 |                                                                 |                                  | 145                              |             |
| 0.32096112                                                      | 1.3239036                                                       | 0.037254903                      | 0.07224305                       |             |

1 2710 "tags=35%, list=19%, signal=43%"  
GSE17721\_0.5H\_VS\_8H\_POLYIC\_BMDC\_DN  
GSE17721\_0.5H\_VS\_8H\_POLYIC\_BMDC\_DN 160  
0.31585094 1.323781 0.034552846 0.07227489 1  
2132 "tags=28%, list=15%, signal=32%"  
GSE29618\_PDC\_VS\_MDC\_DAY7\_FLU\_VACCINE\_UP  
GSE29618\_PDC\_VS\_MDC\_DAY7\_FLU\_VACCINE\_UP 148  
0.31413987 1.3228993 0.042168673 0.07282924  
1 2232 "tags=28%, list=16%, signal=33%"  
GSE1432\_CTRL\_VS\_IFNG\_6H\_MICROGLIA\_DN  
GSE1432\_CTRL\_VS\_IFNG\_6H\_MICROGLIA\_DN 139  
0.3246325 1.32243 0.032967035 0.07310999 1  
2614 "tags=36%, list=19%, signal=44%"  
GSE2770\_UNTREATED\_VS\_TGFB\_AND\_IL4\_TREATED\_ACT\_CD4\_TCELL\_48H\_UP  
GSE2770\_UNTREATED\_VS\_TGFB\_AND\_IL4\_TREATED\_ACT\_CD4\_TCELL\_48H\_UP  
112 0.3357545 1.3223479 0.038383838  
0.0731181 1 1651 "tags=18%, list=12%, signal=20%"  
GSE17721\_PAM3CSK4\_VS\_CPG\_12H\_BMDC\_DN  
GSE17721\_PAM3CSK4\_VS\_CPG\_12H\_BMDC\_DN 164  
0.3177448 1.322309 0.044680852 0.073097214 1  
2156 "tags=26%, list=15%, signal=30%"  
GSE43955\_1H\_VS\_60H\_ACT\_CD4\_TCELL\_UP  
GSE43955\_1H\_VS\_60H\_ACT\_CD4\_TCELL\_UP 161  
0.32062256 1.3220758 0.03448276 0.073197216  
1 2394 "tags=32%, list=17%, signal=38%"  
GSE29618\_PRE\_VS\_DAY7\_POST\_LAIV\_FLU\_VACCINE\_MONOCYTE\_UP  
GSE29618\_PRE\_VS\_DAY7\_POST\_LAIV\_FLU\_VACCINE\_MONOCYTE\_UP  
135 0.32599837 1.3216289 0.045833334  
0.073458135 1 2071 "tags=26%, list=15%, signal=30%"  
GSE28783\_CTRL\_ANTI\_MIR\_VS\_UNTREATED\_ATHEROSCLEROSIS\_MACROPHAGE\_UP  
GSE28783\_CTRL\_ANTI\_MIR\_VS\_UNTREATED\_ATHEROSCLEROSIS\_MACROPHAGE\_UP  
139 0.3241074 1.3211768 0.0583501  
0.07371965 1 1637 "tags=20%, list=12%, signal=23%"  
GSE41176\_UNSTIM\_VS\_ANTI\_IGM\_STIM\_TAK1\_KO\_BCELL\_24H\_UP  
GSE41176\_UNSTIM\_VS\_ANTI\_IGM\_STIM\_TAK1\_KO\_BCELL\_24H\_UP  
141 0.3222698 1.3207942 0.025210084  
0.07394556 1 1796 "tags=28%, list=13%, signal=31%"  
GSE37605\_C57BL6\_VS\_NOD\_FOXP3\_IRES\_GFP\_TCONV\_DN  
GSE37605\_C57BL6\_VS\_NOD\_FOXP3\_IRES\_GFP\_TCONV\_DN 127  
0.32363608 1.3201622 0.039915968 0.07434732  
1 1737 "tags=20%, list=12%, signal=23%"  
GSE19772\_HCMV\_INFL\_VS\_HCMV\_INF\_MONOCYTES\_AND\_PI3K\_INHIBITION\_DN  
GSE19772\_HCMV\_INFL\_VS\_HCMV\_INF\_MONOCYTES\_AND\_PI3K\_INHIBITION\_DN  
153 0.31643015 1.3197954 0.043209877  
0.07459453 1 2143 "tags=33%, list=15%, signal=38%"  
GSE43955\_TH0\_VS\_TGFB\_IL6\_TH17\_ACT\_CD4\_TCELL\_60H\_DN  
GSE43955\_TH0\_VS\_TGFB\_IL6\_TH17\_ACT\_CD4\_TCELL\_60H\_DN 164  
0.3136029 1.319405 0.041322313 0.07482415 1  
2027 "tags=22%, list=14%, signal=25%"  
GSE42021\_TCONV\_PLN\_VS\_CD24LO\_TCONV\_THYMUS\_UP  
GSE42021\_TCONV\_PLN\_VS\_CD24LO\_TCONV\_THYMUS\_UP 159  
0.314141 1.3192858 0.039915968 0.07485551 1  
1929 "tags=23%, list=14%, signal=26%"  
GSE13484\_UNSTIM\_VS\_12H\_YF17D\_VACCINE\_STIM\_PBMC\_DN



|                                                          |                                  |                                  |                                  |     |
|----------------------------------------------------------|----------------------------------|----------------------------------|----------------------------------|-----|
| GSE13484_UNSTIM_VS_12H_YF17D_VACCINE_STIM_PBMC_DN        |                                  |                                  |                                  | 152 |
| 0.320721                                                 | 1.3184274                        | 0.039130434                      | 0.07545567                       | 1   |
| 2393                                                     | "tags=32%, list=17%, signal=38%" |                                  |                                  |     |
| GSE32986_CURDLAN_LOWDOSE_VS_CURDLAN_HIGHDOSE_STIM_DC_UP  |                                  |                                  |                                  |     |
| GSE32986_CURDLAN_LOWDOSE_VS_CURDLAN_HIGHDOSE_STIM_DC_UP  |                                  |                                  |                                  |     |
| 136                                                      | 0.31981775                       | 1.3183976                        | 0.034782607                      |     |
| 0.07542888                                               | 1                                | 1368                             | "tags=21%, list=10%, signal=23%" |     |
| GSE22196_HEALTHY_VS_OBESE_MOUSE_SKIN_GAMMADELTA_TCELL_DN |                                  |                                  |                                  |     |
| GSE22196_HEALTHY_VS_OBESE_MOUSE_SKIN_GAMMADELTA_TCELL_DN |                                  |                                  |                                  |     |
| 160                                                      | 0.31530002                       | 1.3182495                        | 0.043824703                      |     |
| 0.07547832                                               | 1                                | 2027                             | "tags=28%, list=14%, signal=32%" |     |
| GSE360_T_GONDII_VS_M_TUBERCULOSIS_MAC_UP                 |                                  |                                  |                                  |     |
| GSE360_T_GONDII_VS_M_TUBERCULOSIS_MAC_UP                 |                                  |                                  |                                  | 149 |
| 0.31970763                                               | 1.3176582                        | 0.03726708                       | 0.07588036                       |     |
| 1                                                        | 2547                             | "tags=28%, list=18%, signal=34%" |                                  |     |
| GSE14308_NAIVE_CD4_TCELL_VS_INDUCED_TREG_DN              |                                  |                                  |                                  |     |
| GSE14308_NAIVE_CD4_TCELL_VS_INDUCED_TREG_DN              |                                  |                                  |                                  | 141 |
| 0.32114962                                               | 1.3176068                        | 0.045643155                      | 0.07586552                       |     |
| 1                                                        | 2717                             | "tags=37%, list=19%, signal=45%" |                                  |     |
| GSE3039_ALPHABETA_CD8_TCELL_VS_B2_BCELL_DN               |                                  |                                  |                                  |     |
| GSE3039_ALPHABETA_CD8_TCELL_VS_B2_BCELL_DN               |                                  |                                  |                                  | 155 |
| 1.3173726                                                | 0.034858387                      | 0.07597894                       | 0.315535                         |     |
| 1951                                                     | "tags=23%, list=14%, signal=27%" |                                  |                                  |     |
| GSE17721_CTRL_VS_POLYIC_24H_BMDC_UP                      |                                  |                                  |                                  |     |
| GSE17721_CTRL_VS_POLYIC_24H_BMDC_UP                      |                                  |                                  |                                  | 146 |
| 0.31760776                                               | 1.3172615                        | 0.040339705                      | 0.07600107                       |     |
| 1                                                        | 1794                             | "tags=24%, list=13%, signal=27%" |                                  |     |
| GSE17721_LPS_VS_PAM3CSK4_16H_BMDC_UP                     |                                  |                                  |                                  |     |
| GSE17721_LPS_VS_PAM3CSK4_16H_BMDC_UP                     |                                  |                                  |                                  | 161 |
| 0.31736776                                               | 1.3172364                        | 0.034                            | 0.075967245                      | 1   |
| 2055                                                     | "tags=25%, list=15%, signal=29%" |                                  |                                  |     |
| GSE1460_CD4_THYMOCYTE_VS_THYMIC_STROMAL_CELL_UP          |                                  |                                  |                                  |     |
| GSE1460_CD4_THYMOCYTE_VS_THYMIC_STROMAL_CELL_UP          |                                  |                                  |                                  | 134 |
| 0.32258844                                               | 1.3164968                        | 0.04                             | 0.0764487                        |     |
| 1858                                                     | "tags=22%, list=13%, signal=25%" |                                  |                                  |     |
| GSE17721_LPS_VS_GARDIQUIMOD_2H_BMDC_DN                   |                                  |                                  |                                  |     |
| GSE17721_LPS_VS_GARDIQUIMOD_2H_BMDC_DN                   |                                  |                                  |                                  | 146 |
| 0.31793508                                               | 1.3159491                        | 0.03426124                       | 0.076808296                      |     |
| 1                                                        | 1835                             | "tags=22%, list=13%, signal=25%" |                                  |     |
| GSE13887_RESTING_VS_ACT_CD4_TCELL_DN                     |                                  |                                  |                                  |     |
| GSE13887_RESTING_VS_ACT_CD4_TCELL_DN                     |                                  |                                  |                                  | 100 |
| 0.33836028                                               | 1.31591                          | 0.05364807                       | 0.07679139                       | 1   |
| 2595                                                     | "tags=33%, list=18%, signal=40%" |                                  |                                  |     |
| GSE21670_UNTREATED_VS_IL6_TREATED_CD4_TCELL_UP           |                                  |                                  |                                  |     |
| GSE21670_UNTREATED_VS_IL6_TREATED_CD4_TCELL_UP           |                                  |                                  |                                  | 132 |
| 0.32273528                                               | 1.315792                         | 0.032258064                      | 0.07682419                       |     |
| 2718                                                     | "tags=33%, list=19%, signal=41%" |                                  |                                  |     |
| GSE41176_UNSTIM_VS_ANTI_IGM_STIM_BCELL_6H_UP             |                                  |                                  |                                  |     |
| GSE41176_UNSTIM_VS_ANTI_IGM_STIM_BCELL_6H_UP             |                                  |                                  |                                  | 144 |
| 0.31702933                                               | 1.3155463                        | 0.056092843                      | 0.07693763                       |     |
| 1                                                        | 2204                             | "tags=28%, list=16%, signal=33%" |                                  |     |
| GSE17721_LPS_VS_POLYIC_24H_BMDC_UP                       |                                  |                                  |                                  |     |
| GSE17721_LPS_VS_POLYIC_24H_BMDC_UP                       |                                  |                                  |                                  | 147 |
| 0.31736284                                               | 1.315088                         | 0.042510122                      | 0.07725332                       | 1   |

2707 "tags=35%, list=19%, signal=42%"  
 GSE26495\_PD1HIGH\_VS\_PD1LOW\_CD8\_TCELL\_UP  
 GSE26495\_PD1HIGH\_VS\_PD1LOW\_CD8\_TCELL\_UP 105  
 0.33313945 1.3150246 0.060085837 0.07724528  
 1 2376 "tags=29%, list=17%, signal=34%"  
 GSE2585\_THYMIC\_MACROPHAGE\_VS\_MTEC\_DN  
 GSE2585\_THYMIC\_MACROPHAGE\_VS\_MTEC\_DN 131  
 0.32356238 1.3149663 0.04821803 0.077233404  
 1 1711 "tags=22%, list=12%, signal=25%"  
 GSE369\_SOCS3\_KO\_VS\_WT\_LIVER\_DN GSE369\_SOCS3\_KO\_VS\_WT\_LIVER\_DN  
 132 0.3234081 1.3148158 0.038135592  
 0.07729361 1 1611 "tags=20%, list=11%, signal=22%"  
 GSE7852\_LN\_VS\_THYMUS\_TREG\_DN GSE7852\_LN\_VS\_THYMUS\_TREG\_DN  
 153 0.3177659 1.3141017 0.024439918  
 0.07776506 1 2150 "tags=30%, list=15%, signal=35%"  
 GSE7460\_CD8\_TCELL\_VS\_TREG\_ACT\_UP GSE7460\_CD8\_TCELL\_VS\_TREG\_ACT\_UP  
 151 0.3169884 1.3135772 0.02892562  
 0.07810457 1 1355 "tags=22%, list=10%, signal=24%"  
 GSE17721\_CTRL\_VS\_LPS\_12H\_BMDC\_DN GSE17721\_CTRL\_VS\_LPS\_12H\_BMDC\_DN  
 162 0.3138808 1.3132867 0.04183267  
 0.078273185 1 2575 "tags=27%, list=18%, signal=33%"  
 GSE17721\_POLYIC\_VS\_GARDIQUIMOD\_1H\_BMDC\_UP  
 GSE17721\_POLYIC\_VS\_GARDIQUIMOD\_1H\_BMDC\_UP 147  
 0.31544197 1.313043 0.051224943 0.078411065 1  
 1997 "tags=22%, list=14%, signal=25%"  
 GSE5589\_LPS\_VS\_LPS\_AND\_IL10\_STIM\_MACROPHAGE\_45MIN\_UP  
 GSE5589\_LPS\_VS\_LPS\_AND\_IL10\_STIM\_MACROPHAGE\_45MIN\_UP  
 145 0.31486025 1.313042 0.038793102 0.07836246  
 1 1586 "tags=23%, list=11%, signal=26%"  
 GSE15330\_HSC\_VS\_LYMPHOID\_PRIMED\_MULTIPOTENT\_PROGENITOR\_IKAROS\_KO\_UP  
 GSE15330\_HSC\_VS\_LYMPHOID\_PRIMED\_MULTIPOTENT\_PROGENITOR\_IKAROS\_KO\_UP  
 148 0.31790006 1.3125247 0.044397462  
 0.07868503 1 2065 "tags=27%, list=15%, signal=31%"  
 GSE17721\_12H\_VS\_24H\_GARDIQUIMOD\_BMDC\_UP  
 GSE17721\_12H\_VS\_24H\_GARDIQUIMOD\_BMDC\_UP 158  
 0.31349364 1.3125193 0.04385965 0.07864159  
 1 2311 "tags=28%, list=16%, signal=34%"  
 GSE2770\_UNTREATED\_VS\_TGFB\_AND\_IL4\_TREATED\_ACT\_CD4\_TCELL\_2H\_UP  
 GSE2770\_UNTREATED\_VS\_TGFB\_AND\_IL4\_TREATED\_ACT\_CD4\_TCELL\_2H\_UP  
 143 0.31786084 1.311686 0.034979425  
 0.079208955 1 3034 "tags=38%, list=21%, signal=48%"  
 GSE33425\_CD161\_HIGH\_VS\_NEG\_CD8\_TCELL\_DN  
 GSE33425\_CD161\_HIGH\_VS\_NEG\_CD8\_TCELL\_DN 156  
 0.3128206 1.3116456 0.03837953 0.07918918  
 1 1595 "tags=22%, list=11%, signal=24%"  
 GSE339\_EX\_VIVO\_VS\_IN\_CULTURE\_CD8POS\_DC\_DN  
 GSE339\_EX\_VIVO\_VS\_IN\_CULTURE\_CD8POS\_DC\_DN 166 0.312652  
 1.3116417 0.029045643 0.07914479 1  
 2224 "tags=31%, list=16%, signal=36%"  
 GSE43863\_NAIVE\_VS\_TH1\_EFF\_CD4\_TCELL\_D6\_LCMV\_UP  
 GSE43863\_NAIVE\_VS\_TH1\_EFF\_CD4\_TCELL\_D6\_LCMV\_UP 125  
 0.32283527 1.3115429 0.04845815 0.07916998  
 1 2339 "tags=25%, list=17%, signal=29%"  
 GSE23695\_CD57\_POS\_VS\_NEG\_NK\_CELL\_DN

|                                                             |                                  |                                  |                                  |             |
|-------------------------------------------------------------|----------------------------------|----------------------------------|----------------------------------|-------------|
| GSE23695_CD57_POS_VS_NEG_NK_CELL_DN                         |                                  |                                  |                                  | 148         |
| 0.31562257                                                  | 1.3100882                        | 0.049792532                      |                                  | 0.0802093   |
| 1                                                           | 2305                             | "tags=30%, list=16%, signal=36%" |                                  |             |
| GSE6259_DEC205_POS_DC_VS_CD4_TCELL_UP                       |                                  |                                  |                                  |             |
| GSE6259_DEC205_POS_DC_VS_CD4_TCELL_UP                       |                                  |                                  |                                  | 142         |
| 0.31657532                                                  | 1.3095775                        | 0.049484536                      |                                  | 0.08057151  |
| 1                                                           | 2243                             | "tags=28%, list=16%, signal=33%" |                                  |             |
| GSE360_T_GONDII_VS_B_MALAYI_HIGH_DOSE_MAC_UP                |                                  |                                  |                                  |             |
| GSE360_T_GONDII_VS_B_MALAYI_HIGH_DOSE_MAC_UP                |                                  |                                  |                                  | 146         |
| 0.31379354                                                  | 1.3093644                        | 0.05498982                       |                                  | 0.08068812  |
| 1                                                           | 1419                             | "tags=22%, list=10%, signal=24%" |                                  |             |
| GSE25123_CTRL_VS_ROSIGLITAZONE_STIM_MACROPHAGE_UP           |                                  |                                  |                                  |             |
| GSE25123_CTRL_VS_ROSIGLITAZONE_STIM_MACROPHAGE_UP           |                                  |                                  |                                  | 148         |
| 0.31844893                                                  | 1.3089005                        | 0.045081966                      |                                  | 0.08097464  |
| 1                                                           | 1683                             | "tags=26%, list=12%, signal=29%" |                                  |             |
| GSE21927_SPLENIC_C26GM_TUMOROUS_VS_4T1_TUMOR_MONOCYTES_UP   |                                  |                                  |                                  |             |
| GSE21927_SPLENIC_C26GM_TUMOROUS_VS_4T1_TUMOR_MONOCYTES_UP   |                                  |                                  |                                  |             |
| 109                                                         | 0.32754812                       | 1.3086289                        | 0.048780486                      |             |
| 0.081124865                                                 | 1                                | 2279                             | "tags=25%, list=16%, signal=29%" |             |
| GSE17721_POLYIC_VS_GARDIQUIMOD_0.5H_BMDC_DN                 |                                  |                                  |                                  |             |
| GSE17721_POLYIC_VS_GARDIQUIMOD_0.5H_BMDC_DN                 |                                  |                                  |                                  | 142         |
| 0.3235781                                                   | 1.3084811                        | 0.04831933                       |                                  | 0.08118652  |
| 1                                                           | 2365                             | "tags=30%, list=17%, signal=35%" |                                  |             |
| GSE24972_WT_VS_IRF8_KO_SPLEEN_FOLLICULAR_BCELL_UP           |                                  |                                  |                                  |             |
| GSE24972_WT_VS_IRF8_KO_SPLEEN_FOLLICULAR_BCELL_UP           |                                  |                                  |                                  | 137         |
| 0.32368383                                                  | 1.3080581                        | 0.05543237                       |                                  | 0.081456564 |
| 1                                                           | 2003                             | "tags=20%, list=14%, signal=23%" |                                  |             |
| GSE13306_LAMINA_PROPRIA_VS_SPLEEN_TREG_DN                   |                                  |                                  |                                  |             |
| GSE13306_LAMINA_PROPRIA_VS_SPLEEN_TREG_DN                   |                                  |                                  |                                  | 133         |
| 0.3189793                                                   | 1.3078959                        | 0.059322033                      |                                  | 0.081558675 |
| 1                                                           | 1680                             | "tags=22%, list=12%, signal=25%" |                                  |             |
| GSE24972_MARGINAL_ZONE_BCELL_VS_FOLLICULAR_BCELL_IRF8_KO_UP |                                  |                                  |                                  |             |
| GSE24972_MARGINAL_ZONE_BCELL_VS_FOLLICULAR_BCELL_IRF8_KO_UP |                                  |                                  |                                  |             |
| 140                                                         | 0.31662956                       | 1.3077406                        | 0.056133058                      |             |
| 0.081621416                                                 | 1                                | 2177                             | "tags=21%, list=15%, signal=25%" |             |
| GSE3982_EOSINOPHIL_VS_NEUTROPHIL_UP                         |                                  |                                  |                                  |             |
| GSE3982_EOSINOPHIL_VS_NEUTROPHIL_UP                         |                                  |                                  |                                  | 131         |
| 0.3236977                                                   | 1.3074589                        | 0.055084746                      |                                  | 0.08176671  |
| 1                                                           | 1835                             | "tags=27%, list=13%, signal=30%" |                                  |             |
| GSE25088_WT_VS_STAT6_KO_MACROPHAGE_ROSIGLITAZONE_STIM_UP    |                                  |                                  |                                  |             |
| GSE25088_WT_VS_STAT6_KO_MACROPHAGE_ROSIGLITAZONE_STIM_UP    |                                  |                                  |                                  |             |
| 128                                                         | 0.3218735                        | 1.3072692                        | 0.045081966                      |             |
| 0.08186877                                                  | 1                                | 2011                             | "tags=25%, list=14%, signal=29%" |             |
| GSE16385_IFNG_TNF_VS_IL4_STIM_MACROPHAGE_UP                 |                                  |                                  |                                  |             |
| GSE16385_IFNG_TNF_VS_IL4_STIM_MACROPHAGE_UP                 |                                  |                                  |                                  | 150         |
| 0.310826                                                    | 1.3071352                        | 0.033826638                      | 0.08192457                       | 1           |
| 2124                                                        | "tags=28%, list=15%, signal=33%" |                                  |                                  |             |
| GSE46468_LUNG_INNATE_LYMPHOID_CELL_VS_SPLEEN_CD4_TCELL_UP   |                                  |                                  |                                  |             |
| GSE46468_LUNG_INNATE_LYMPHOID_CELL_VS_SPLEEN_CD4_TCELL_UP   |                                  |                                  |                                  |             |
| 116                                                         | 0.33121368                       | 1.3055011                        | 0.067510545                      |             |
| 0.08312365                                                  | 1                                | 1840                             | "tags=27%, list=13%, signal=30%" |             |
| GSE22601_DOUBLE_NEGATIVE_VS_IMMATURE_CD4_SP_THYMOCYTE_UP    |                                  |                                  |                                  |             |
| GSE22601_DOUBLE_NEGATIVE_VS_IMMATURE_CD4_SP_THYMOCYTE_UP    |                                  |                                  |                                  |             |
| 126                                                         | 0.32107142                       | 1.3048822                        | 0.04821803                       |             |

|                                                                |                                  |                                  |                                  |             |
|----------------------------------------------------------------|----------------------------------|----------------------------------|----------------------------------|-------------|
| 0.083591305                                                    | 1                                | 2221                             | "tags=32%, list=16%, signal=37%" |             |
| GSE15930_STIM_VS_STIM_AND_IL12_48H_CD8_T_CELL_UP               |                                  |                                  |                                  |             |
| GSE15930_STIM_VS_STIM_AND_IL12_48H_CD8_T_CELL_UP               |                                  |                                  |                                  | 152         |
| 0.31449682                                                     | 1.3045473                        | 0.052734375                      |                                  | 0.083789445 |
| 1                                                              | 2301                             | "tags=30%, list=16%, signal=36%" |                                  |             |
| GSE26928_NAIVE_VS_CENT_MEMORY_CD4_TCELL_DN                     |                                  |                                  |                                  |             |
| GSE26928_NAIVE_VS_CENT_MEMORY_CD4_TCELL_DN                     |                                  |                                  |                                  | 140         |
| 0.31747323                                                     | 1.3035113                        | 0.06431536                       |                                  | 0.08453651  |
| 1                                                              | 1604                             | "tags=25%, list=11%, signal=28%" |                                  |             |
| GSE17721_LPS_VS_GARDIQUIMOD_12H_BMDC_DN                        |                                  |                                  |                                  |             |
| GSE17721_LPS_VS_GARDIQUIMOD_12H_BMDC_DN                        |                                  |                                  |                                  | 155         |
| 0.31195506                                                     | 1.3034778                        | 0.04831933                       |                                  | 0.084504634 |
| 1                                                              | 1977                             | "tags=23%, list=14%, signal=27%" |                                  |             |
| GSE360_HIGH_DOSE_B_MALAYI_VS_M_TUBERCULOSIS_DC_UP              |                                  |                                  |                                  |             |
| GSE360_HIGH_DOSE_B_MALAYI_VS_M_TUBERCULOSIS_DC_UP              |                                  |                                  |                                  | 156         |
| 0.30970418                                                     | 1.3034589                        | 0.03409091                       |                                  | 0.08446772  |
| 1                                                              | 2325                             | "tags=31%, list=16%, signal=37%" |                                  |             |
| GSE43955_1H_VS_60H_ACT_CD4_TCELL_DN                            |                                  |                                  |                                  |             |
| GSE43955_1H_VS_60H_ACT_CD4_TCELL_DN                            |                                  |                                  |                                  | 155         |
| 0.31328613                                                     | 1.3033848                        | 0.048523206                      |                                  | 0.084487714 |
| 1                                                              | 1283                             | "tags=16%, list=9%, signal=18%"  |                                  |             |
| GSE17721_CTRL_VS_LPS_6H_BMDC_UP                                | GSE17721_CTRL_VS_LPS_6H_BMDC_UP  |                                  |                                  |             |
|                                                                | 147                              | 0.31622607                       | 1.3033352                        | 0.047034767 |
| 0.08447949                                                     | 1                                | 1889                             | "tags=28%, list=13%, signal=32%" |             |
| GSE1432_1H_VS_6H_IFNG_MICROGLIA_DN                             |                                  |                                  |                                  |             |
| GSE1432_1H_VS_6H_IFNG_MICROGLIA_DN                             |                                  |                                  |                                  | 145         |
| 0.31505615                                                     | 1.3030558                        | 0.05882353                       |                                  | 0.08466807  |
| 1                                                              | 2444                             | "tags=32%, list=17%, signal=39%" |                                  |             |
| GSE1448_CTRL_VS_ANTI_VBETA5_DP_THYMOCYTE_DN                    |                                  |                                  |                                  |             |
| GSE1448_CTRL_VS_ANTI_VBETA5_DP_THYMOCYTE_DN                    |                                  |                                  |                                  | 161         |
| 0.3117354                                                      | 1.3022718                        | 0.040948275                      |                                  | 0.08523737  |
| 1                                                              | 1841                             | "tags=26%, list=13%, signal=30%" |                                  |             |
| GSE24026_PD1_LIGATION_VS_CTRL_IN_ACT_TCELL_LINE_UP             |                                  |                                  |                                  |             |
| GSE24026_PD1_LIGATION_VS_CTRL_IN_ACT_TCELL_LINE_UP             |                                  |                                  |                                  | 144         |
| 0.31532395                                                     | 1.3022494                        | 0.038709678                      |                                  | 0.08520227  |
| 1                                                              | 2623                             | "tags=36%, list=19%, signal=44%" |                                  |             |
| GSE27786_LSK_VS_BCELL_DN                                       | GSE27786_LSK_VS_BCELL_DN         |                                  |                                  | 144         |
| 0.31129968                                                     | 1.300397                         | 0.05944798                       | 0.08656825                       | 1           |
| 2671                                                           | "tags=35%, list=19%, signal=43%" |                                  |                                  |             |
| GSE17721_12H_VS_24H_POLYIC_BMDC_DN                             |                                  |                                  |                                  |             |
| GSE17721_12H_VS_24H_POLYIC_BMDC_DN                             |                                  |                                  |                                  | 145         |
| 0.31636027                                                     | 1.2993301                        | 0.058577407                      |                                  | 0.08738757  |
| 1                                                              | 1689                             | "tags=21%, list=12%, signal=24%" |                                  |             |
| GSE46606_IRF4HIGH_VS_WT_CD40L_IL2_IL5_DAY3_STIMULATED_BCELL_UP |                                  |                                  |                                  |             |
| GSE46606_IRF4HIGH_VS_WT_CD40L_IL2_IL5_DAY3_STIMULATED_BCELL_UP |                                  |                                  |                                  |             |
|                                                                | 142                              | 0.3133011                        | 1.2989092                        | 0.06734694  |
| 0.087717004                                                    | 1                                | 2828                             | "tags=37%, list=20%, signal=46%" |             |
| GSE43955_TH0_VS_TGFB_IL6_IL23_TH17_ACT_CD4_TCELL_52H_UP        |                                  |                                  |                                  |             |
| GSE43955_TH0_VS_TGFB_IL6_IL23_TH17_ACT_CD4_TCELL_52H_UP        |                                  |                                  |                                  |             |
| 158                                                            | 0.31184307                       | 1.2975789                        | 0.045454547                      |             |
| 0.088725016                                                    | 1                                | 2072                             | "tags=27%, list=15%, signal=31%" |             |
| GSE20715_WT_VS_TLR4_KO_48H_OZONE_LUNG_DN                       |                                  |                                  |                                  |             |
| GSE20715_WT_VS_TLR4_KO_48H_OZONE_LUNG_DN                       |                                  |                                  |                                  | 159         |
| 0.31103495                                                     | 1.2972482                        | 0.04892368                       |                                  | 0.08893417  |

1 2452 "tags=31%, list=17%, signal=38%"  
GSE6092\_B\_BURGDOFERI\_VS\_B\_BURGDORFERI\_AND\_IFNG\_STIM\_ENDOTHELIAL\_CELL\_DN  
GSE6092\_B\_BURGDOFERI\_VS\_B\_BURGDORFERI\_AND\_IFNG\_STIM\_ENDOTHELIAL\_CELL\_DN  
0.0491453 149 0.31057057 1.2971178  
0.088988386 1 2228 "tags=24%, list=16%, signal=28%"  
GSE3337\_4H\_VS\_16H\_IFNG\_IN\_CD8POS\_DC\_DN  
GSE3337\_4H\_VS\_16H\_IFNG\_IN\_CD8POS\_DC\_DN 152  
0.31331614 1.2967666 0.05732484 0.08923763  
1 1948 "tags=28%, list=14%, signal=32%"  
GSE26343\_WT\_VS\_NFAT5\_KO\_MACROPHAGE\_LPS\_STIM\_DN  
GSE26343\_WT\_VS\_NFAT5\_KO\_MACROPHAGE\_LPS\_STIM\_DN 140  
0.30840355 1.2966542 0.04411765 0.08926405  
1 1044 "tags=16%, list=7%, signal=18%"  
GSE7509\_DC\_VS\_MONOCYTE\_DN GSE7509\_DC\_VS\_MONOCYTE\_DN 143  
0.31607586 1.2965219 0.036956523 0.089328624  
1 1839 "tags=25%, list=13%, signal=29%"  
GSE11057\_CD4\_EFF\_MEM\_VS\_PBMC\_DN GSE11057\_CD4\_EFF\_MEM\_VS\_PBMC\_DN  
136 0.315034 1.2964967 0.054507338  
0.08929488 1 1847 "tags=20%, list=13%, signal=23%"  
GSE2770\_IL12\_VS\_IL4\_TREATED\_ACT\_CD4\_TCELL\_6H\_DN  
GSE2770\_IL12\_VS\_IL4\_TREATED\_ACT\_CD4\_TCELL\_6H\_DN 149  
0.31612778 1.2958899 0.05567452 0.08972693  
1 2720 "tags=38%, list=19%, signal=46%"  
GSE3691\_CONVENTIONAL\_VS\_PLASMACYTOID\_DC\_SPLEEN\_DN  
GSE3691\_CONVENTIONAL\_VS\_PLASMACYTOID\_DC\_SPLEEN\_DN 149  
0.31236413 1.295818 0.052516412 0.0897266 1  
2124 "tags=19%, list=15%, signal=23%"  
GSE32986\_GMCSF\_AND\_CURDLAN\_LOWDOSE\_VS\_GMCSF\_AND\_CURDLAN\_HIGHDOSE\_STIM\_DC\_UP  
GSE32986\_GMCSF\_AND\_CURDLAN\_LOWDOSE\_VS\_GMCSF\_AND\_CURDLAN\_HIGHDOSE\_STIM\_DC\_UP  
145 0.31565467 1.2953982  
0.058333334 0.09001183 1 2371 "tags=23%, list=17%, signal=27%"  
GSE26343\_WT\_VS\_NFAT5\_KO\_MACROPHAGE\_UP  
GSE26343\_WT\_VS\_NFAT5\_KO\_MACROPHAGE\_UP 152  
0.31286305 1.2947401 0.055679288 0.09054236  
1 1584 "tags=24%, list=11%, signal=27%"  
GSE360\_DC\_VS\_MAC\_B\_MALAYI\_HIGH\_DOSE\_UP  
GSE360\_DC\_VS\_MAC\_B\_MALAYI\_HIGH\_DOSE\_UP 156  
0.31275123 1.2933846 0.05 0.09163373 1  
2428 "tags=32%, list=17%, signal=38%"  
GSE30971\_CTRL\_VS\_LPS\_STIM\_MACROPHAGE\_WBP7\_HET\_2H\_DN  
GSE30971\_CTRL\_VS\_LPS\_STIM\_MACROPHAGE\_WBP7\_HET\_2H\_DN  
132 0.31671444 1.2923868 0.052953158  
0.09245727 1 1399 "tags=19%, list=10%, signal=21%"  
GSE34006\_A2AR\_KO\_VS\_A2AR\_AGONIST\_TREATED\_TREG\_DN  
GSE34006\_A2AR\_KO\_VS\_A2AR\_AGONIST\_TREATED\_TREG\_DN 140  
0.3100655 1.2919112 0.06680585 0.09279899  
1 2222 "tags=26%, list=16%, signal=31%"  
GSE18791\_CTRL\_VS\_NEWCASTLE\_VIRUS\_DC\_8H\_UP  
GSE18791\_CTRL\_VS\_NEWCASTLE\_VIRUS\_DC\_8H\_UP 124  
0.31991875 1.2916536 0.06212425 0.092959434

|                                                                 |                                  |                                  |                                  |
|-----------------------------------------------------------------|----------------------------------|----------------------------------|----------------------------------|
| 1                                                               | 2695                             | "tags=33%, list=19%, signal=41%" |                                  |
| GSE28783_ANTI_MIR33_VS_UNTREATED_ATHEROSCLEROSIS_MACROPHAGE_UP  |                                  |                                  |                                  |
| GSE28783_ANTI_MIR33_VS_UNTREATED_ATHEROSCLEROSIS_MACROPHAGE_UP  |                                  |                                  |                                  |
|                                                                 | 147                              | 0.31168237                       | 1.2914311 0.047413792            |
| 0.09309706                                                      | 1                                | 1882                             | "tags=23%, list=13%, signal=26%" |
| GSE360_CTRL_VS_T_GONDII_MAC_DN GSE360_CTRL_VS_T_GONDII_MAC_DN   |                                  |                                  |                                  |
|                                                                 | 152                              | 0.30785725                       | 1.2914027 0.045908183            |
| 0.093063295                                                     | 1                                | 2286                             | "tags=28%, list=16%, signal=33%" |
| GSE15659_RESTING_TREG_VS_NONSUPPRESSIVE_TCELL_DN                |                                  |                                  |                                  |
| GSE15659_RESTING_TREG_VS_NONSUPPRESSIVE_TCELL_DN                |                                  |                                  |                                  |
|                                                                 |                                  |                                  | 148                              |
| 0.30990604                                                      | 1.2913224                        | 0.05732484                       | 0.09307483                       |
| 1                                                               | 1919                             | "tags=22%, list=14%, signal=25%" |                                  |
| GSE26030_TH1_VS_TH17_DAY15_POST_POLARIZATION_DN                 |                                  |                                  |                                  |
| GSE26030_TH1_VS_TH17_DAY15_POST_POLARIZATION_DN                 |                                  |                                  |                                  |
|                                                                 |                                  |                                  | 138                              |
| 0.3145141                                                       | 1.2913152                        | 0.05106383                       | 0.09302311                       |
| 1                                                               | 2449                             | "tags=33%, list=17%, signal=40%" |                                  |
| GSE17721_ALL_VS_24H_PAM3CSK4_BMDC_DN                            |                                  |                                  |                                  |
| GSE17721_ALL_VS_24H_PAM3CSK4_BMDC_DN                            |                                  |                                  |                                  |
|                                                                 |                                  |                                  | 151                              |
| 0.30987653                                                      | 1.2912883                        | 0.04347826                       | 0.09299534                       |
| 1                                                               | 1674                             | "tags=24%, list=12%, signal=27%" |                                  |
| GSE6269_HEALTHY_VS_STAPH_AUREUS_INF_PBMC_UP                     |                                  |                                  |                                  |
| GSE6269_HEALTHY_VS_STAPH_AUREUS_INF_PBMC_UP                     |                                  |                                  |                                  |
|                                                                 |                                  |                                  | 112                              |
| 0.3296434                                                       | 1.2907643                        | 0.055670105                      | 0.093389936                      |
| 1                                                               | 2385                             | "tags=36%, list=17%, signal=43%" |                                  |
| GSE15659_NONSUPPRESSIVE_TCELL_VS_ACTIVATED_TREG_DN              |                                  |                                  |                                  |
| GSE15659_NONSUPPRESSIVE_TCELL_VS_ACTIVATED_TREG_DN              |                                  |                                  |                                  |
|                                                                 |                                  |                                  | 135                              |
| 0.31722283                                                      | 1.290595                         | 0.057312254                      | 0.093471296 1                    |
| 1527                                                            | "tags=18%, list=11%, signal=20%" |                                  |                                  |
| GSE34156_UNTREATED_VS_24H_NOD2_LIGAND_TREATED_MONOCYTE_UP       |                                  |                                  |                                  |
| GSE34156_UNTREATED_VS_24H_NOD2_LIGAND_TREATED_MONOCYTE_UP       |                                  |                                  |                                  |
| 111                                                             | 0.32521632                       | 1.2904387                        | 0.067653276                      |
| 0.0935681                                                       | 1                                | 1559                             | "tags=18%, list=11%, signal=20%" |
| GSE17721_CTRL_VS_CPG_6H_BMDC_UP GSE17721_CTRL_VS_CPG_6H_BMDC_UP |                                  |                                  |                                  |
|                                                                 | 154                              | 0.3048646                        | 1.2899737 0.052419353            |
| 0.093910344                                                     | 1                                | 2464                             | "tags=31%, list=17%, signal=37%" |
| GSE17721_0.5H_VS_8H_PAM3CSK4_BMDC_DN                            |                                  |                                  |                                  |
| GSE17721_0.5H_VS_8H_PAM3CSK4_BMDC_DN                            |                                  |                                  |                                  |
|                                                                 |                                  |                                  | 155                              |
| 0.30787683                                                      | 1.2898743                        | 0.045454547                      | 0.093945675                      |
| 1                                                               | 1594                             | "tags=18%, list=11%, signal=20%" |                                  |
| GSE17721_CTRL_VS_LPS_6H_BMDC_DN GSE17721_CTRL_VS_LPS_6H_BMDC_DN |                                  |                                  |                                  |
|                                                                 | 161                              | 0.30693528                       | 1.289502 0.04761905 0.094197     |
| 1                                                               | 1218                             | "tags=17%, list=9%, signal=19%"  |                                  |
| GSE27786_BCELL_VS_CD4_TCELL_UP GSE27786_BCELL_VS_CD4_TCELL_UP   |                                  |                                  |                                  |
|                                                                 | 139                              | 0.31890324                       | 1.2890517 0.057259712            |
| 0.09452127                                                      | 1                                | 2140                             | "tags=28%, list=15%, signal=33%" |
| GSE18281_CORTICAL_VS_MEDULLARY_THYMOCYTE_UP                     |                                  |                                  |                                  |
| GSE18281_CORTICAL_VS_MEDULLARY_THYMOCYTE_UP                     |                                  |                                  |                                  |
|                                                                 |                                  |                                  | 152                              |
| 0.3120152                                                       | 1.2885498                        | 0.06652807                       | 0.09490139                       |
| 1                                                               | 2511                             | "tags=37%, list=18%, signal=44%" |                                  |
| GSE1432_6H_VS_24H_IFNG_MICROGLIA_DN                             |                                  |                                  |                                  |
| GSE1432_6H_VS_24H_IFNG_MICROGLIA_DN                             |                                  |                                  |                                  |
|                                                                 |                                  |                                  | 148                              |
| 0.31493294                                                      | 1.2884029                        | 0.0524109                        | 0.09495494                       |
| 1                                                               | 1910                             | "tags=26%, list=14%, signal=30%" |                                  |
| GSE17721_12H_VS_24H_POLYIC_BMDC_UP                              |                                  |                                  |                                  |

|                                                                |                                  |                                  |                                  |             |
|----------------------------------------------------------------|----------------------------------|----------------------------------|----------------------------------|-------------|
| GSE17721_12H_VS_24H_POLYIC_BMDC_UP                             |                                  |                                  |                                  | 159         |
| 0.3060229                                                      | 1.2883681                        | 0.05394191                       |                                  | 0.09492551  |
| 1                                                              | 2142                             | "tags=28%, list=15%, signal=33%" |                                  |             |
| GSE17721_CTRL_VS_GARDIQUIMOD_24H_BMDC_UP                       |                                  |                                  |                                  |             |
| GSE17721_CTRL_VS_GARDIQUIMOD_24H_BMDC_UP                       |                                  |                                  | 145                              |             |
| 0.30965865                                                     | 1.288236                         | 0.058951966                      | 0.09499554                       | 1           |
| 2795                                                           | "tags=33%, list=20%, signal=41%" |                                  |                                  |             |
| GSE22886_NAIVE_CD4_TCELL_VS_MONOCYTE_DN                        |                                  |                                  |                                  |             |
| GSE22886_NAIVE_CD4_TCELL_VS_MONOCYTE_DN                        |                                  |                                  | 155                              |             |
| 0.3062105                                                      | 1.2874305                        | 0.04809619                       |                                  | 0.09567556  |
| 1                                                              | 2083                             | "tags=30%, list=15%, signal=35%" |                                  |             |
| GSE26343_UNSTIM_VS_LPS_STIM_MACROPHAGE_UP                      |                                  |                                  |                                  |             |
| GSE26343_UNSTIM_VS_LPS_STIM_MACROPHAGE_UP                      |                                  |                                  | 152                              |             |
| 0.31079462                                                     | 1.2873605                        | 0.050314464                      |                                  | 0.09567004  |
| 1                                                              | 2215                             | "tags=30%, list=16%, signal=35%" |                                  |             |
| GSE360_DC_VS_MAC_L_DONOVANI_DN                                 | GSE360_DC_VS_MAC_L_DONOVANI_DN   |                                  |                                  |             |
| 164                                                            | 0.3054931                        | 1.2869413                        |                                  | 0.046709128 |
| 0.095957525                                                    | 1                                | 1840                             | "tags=22%, list=13%, signal=25%" |             |
| GSE26488_WT_VS_HDAC7_KO_DOUBLE_POSITIVE_THYMOCYTE_UP           |                                  |                                  |                                  |             |
| GSE26488_WT_VS_HDAC7_KO_DOUBLE_POSITIVE_THYMOCYTE_UP           |                                  |                                  |                                  |             |
| 116                                                            | 0.32122326                       | 1.2864608                        |                                  | 0.06437768  |
| 0.096365675                                                    | 1                                | 1396                             | "tags=20%, list=10%, signal=22%" |             |
| GSE14308_TH2_VS_TH1_UP                                         | GSE14308_TH2_VS_TH1_UP           |                                  |                                  | 143         |
| 0.3104531                                                      | 1.2858962                        | 0.050301813                      |                                  | 0.096783325 |
| 1                                                              | 2524                             | "tags=30%, list=18%, signal=36%" |                                  |             |
| GSE43863_DAY6_EFF_VS_DAY150_MEM_LY6C_INT_CXCR5POS_CD4_TCELL_DN |                                  |                                  |                                  |             |
| GSE43863_DAY6_EFF_VS_DAY150_MEM_LY6C_INT_CXCR5POS_CD4_TCELL_DN |                                  |                                  |                                  |             |
| 146                                                            | 0.31349042                       | 1.2853615                        |                                  | 0.055785123 |
| 0.09719815                                                     | 1                                | 1860                             | "tags=27%, list=13%, signal=31%" |             |
| GSE23321_CD8_STEM_CELL_MEMORY_VS_NAIVE_CD8_TCELL_UP            |                                  |                                  |                                  |             |
| GSE23321_CD8_STEM_CELL_MEMORY_VS_NAIVE_CD8_TCELL_UP            |                                  |                                  |                                  |             |
| 129                                                            | 0.31787503                       | 1.2848557                        |                                  | 0.058951966 |
| 0.09759305                                                     | 1                                | 1861                             | "tags=27%, list=13%, signal=31%" |             |
| GSE22611_NOD2_VS_MUTANT_NOD2_TRANSDUCE_HEK293T_CELL_UP         |                                  |                                  |                                  |             |
| GSE22611_NOD2_VS_MUTANT_NOD2_TRANSDUCE_HEK293T_CELL_UP         |                                  |                                  |                                  |             |
| 138                                                            | 0.31266966                       | 1.2848433                        |                                  | 0.055555556 |
| 0.09754558                                                     | 1                                | 2226                             | "tags=28%, list=16%, signal=33%" |             |
| GSE9988_LPS_VS_LOW_LPS_MONOCYTE_UP                             |                                  |                                  |                                  |             |
| GSE9988_LPS_VS_LOW_LPS_MONOCYTE_UP                             |                                  |                                  | 89                               |             |
| 0.33304673                                                     | 1.2845179                        | 0.08315098                       |                                  | 0.097748175 |
| 1                                                              | 1670                             | "tags=16%, list=12%, signal=18%" |                                  |             |
| GSE17721_LPS_VS_POLYIC_16H_BMDC_DN                             |                                  |                                  |                                  |             |
| GSE17721_LPS_VS_POLYIC_16H_BMDC_DN                             |                                  |                                  | 157                              |             |
| 0.30735993                                                     | 1.2844105                        | 0.055009823                      |                                  | 0.097776756 |
| 1                                                              | 1424                             | "tags=18%, list=10%, signal=20%" |                                  |             |
| GSE21670_TGFB_VS_TGFB_AND_IL6_TREATED_CD4_TCELL_DN             |                                  |                                  |                                  |             |
| GSE21670_TGFB_VS_TGFB_AND_IL6_TREATED_CD4_TCELL_DN             |                                  |                                  |                                  | 141         |
| 0.30699223                                                     | 1.2841984                        | 0.04140787                       |                                  | 0.09786819  |
| 1                                                              | 2065                             | "tags=31%, list=15%, signal=36%" |                                  |             |
| GSE6259_FLT3L_INDUCED_DEC205_POS_DC_VS_CD4_TCELL_UP            |                                  |                                  |                                  |             |
| GSE6259_FLT3L_INDUCED_DEC205_POS_DC_VS_CD4_TCELL_UP            |                                  |                                  |                                  |             |
| 128                                                            | 0.31947982                       | 1.2841705                        |                                  | 0.054968286 |
| 0.097828485                                                    | 1                                | 2594                             | "tags=36%, list=18%, signal=44%" |             |
| GSE42088_UNINF_VS_LEISHMANIA_INF_DC_4H_DN                      |                                  |                                  |                                  |             |

|                                                                      |                                  |                                  |                                  |                       |
|----------------------------------------------------------------------|----------------------------------|----------------------------------|----------------------------------|-----------------------|
| GSE42088_UNINF_VS_LEISHMANIA_INF_DC_4H_DN                            |                                  |                                  |                                  | 118                   |
| 0.3150066                                                            | 1.2841388                        | 0.07172996                       |                                  | 0.09780032            |
| 1                                                                    | 1725                             | "tags=25%, list=12%, signal=29%" |                                  |                       |
| GSE42021_CD24HI_VS_CD24INT_TREG_THYMUS_DN                            |                                  |                                  |                                  |                       |
| GSE42021_CD24HI_VS_CD24INT_TREG_THYMUS_DN                            |                                  |                                  |                                  | 135                   |
| 0.3139351                                                            | 1.2839139                        | 0.043659043                      |                                  | 0.09793933            |
| 1                                                                    | 2358                             | "tags=34%, list=17%, signal=41%" |                                  |                       |
| GSE36392_TYPE_2_MYELOID_VS_MAC_IL25_TREATED_LUNG_DN                  |                                  |                                  |                                  |                       |
| GSE36392_TYPE_2_MYELOID_VS_MAC_IL25_TREATED_LUNG_DN                  |                                  |                                  |                                  |                       |
| 136                                                                  | 0.31037706                       | 1.2834569                        | 0.0498008                        |                       |
| 0.09832921                                                           | 1                                | 2486                             | "tags=29%, list=18%, signal=34%" |                       |
| GSE22886_NAIVE_BCELL_VS_BM_PLASMA_CELL_UP                            |                                  |                                  |                                  |                       |
| GSE22886_NAIVE_BCELL_VS_BM_PLASMA_CELL_UP                            |                                  |                                  |                                  | 139                   |
| 0.31335035                                                           | 1.2829624                        | 0.06772009                       |                                  | 0.09870289            |
| 1                                                                    | 2194                             | "tags=30%, list=16%, signal=35%" |                                  |                       |
| GSE40666_NAIVE_VS_EFFECTOR_CD8_TCELL_WITH_IFNA_STIM_90MIN_UP         |                                  |                                  |                                  |                       |
| GSE40666_NAIVE_VS_EFFECTOR_CD8_TCELL_WITH_IFNA_STIM_90MIN_UP         |                                  |                                  |                                  |                       |
| 149                                                                  | 0.30876228                       | 1.2828958                        | 0.057971016                      |                       |
| 0.098698504                                                          | 1                                | 2349                             | "tags=33%, list=17%, signal=39%" |                       |
| GSE40274_CTRL_VS_IRF4_TRANSDUCED_ACTIVATED_CD4_TCELL_DN              |                                  |                                  |                                  |                       |
| GSE40274_CTRL_VS_IRF4_TRANSDUCED_ACTIVATED_CD4_TCELL_DN              |                                  |                                  |                                  |                       |
| 137                                                                  | 0.31247514                       | 1.2828587                        | 0.056640625                      |                       |
| 0.09866205                                                           | 1                                | 1678                             | "tags=23%, list=12%, signal=25%" |                       |
| GSE44649_NAIVE_VS_ACTIVATED_CD8_TCELL_MIR155_KO_DN                   |                                  |                                  |                                  |                       |
| GSE44649_NAIVE_VS_ACTIVATED_CD8_TCELL_MIR155_KO_DN                   |                                  |                                  |                                  | 135                   |
| 0.31249774                                                           | 1.2822431                        | 0.052854124                      | 0.09915458                       |                       |
| 1                                                                    | 2215                             | "tags=30%, list=16%, signal=36%" |                                  |                       |
| GSE13306_TREG_VS_TCONV_SPLEEN_DN                                     | GSE13306_TREG_VS_TCONV_SPLEEN_DN |                                  |                                  |                       |
| 148                                                                  | 0.3118044                        | 1.2821782                        | 0.05144033                       |                       |
| 0.099158496                                                          | 1                                | 1680                             | "tags=24%, list=12%, signal=27%" |                       |
| GSE22886_NAIVE_CD8_TCELL_VS_MEMORY_TCELL_UP                          |                                  |                                  |                                  |                       |
| GSE22886_NAIVE_CD8_TCELL_VS_MEMORY_TCELL_UP                          |                                  |                                  |                                  | 139                   |
| 0.31053042                                                           | 1.282039                         | 0.046653144                      | 0.099239185                      | 1                     |
| 2588                                                                 | "tags=31%, list=18%, signal=38%" |                                  |                                  |                       |
| GSE22611_UNSTIM_VS_6H_MDP_STIM_MUTANT_NOD2_TRANSDUCED_HEK293T_CELL_U |                                  |                                  |                                  |                       |
| P                                                                    |                                  |                                  |                                  |                       |
| GSE22611_UNSTIM_VS_6H_MDP_STIM_MUTANT_NOD2_TRANSDUCED_HEK293T_CELL_U |                                  |                                  |                                  |                       |
| P                                                                    | 139                              | 0.3118703                        | 1.2815424                        |                       |
| 0.08024691                                                           | 0.09963718                       | 1                                | 2204                             | "tags=27%,            |
|                                                                      |                                  |                                  |                                  | list=16%, signal=31%" |
| GSE360_L_DONOVANI_VS_M_TUBERCULOSIS_DC_UP                            |                                  |                                  |                                  |                       |
| GSE360_L_DONOVANI_VS_M_TUBERCULOSIS_DC_UP                            |                                  |                                  |                                  | 154                   |
| 0.3072704                                                            | 1.2810888                        | 0.06903765                       | 0.09998977                       |                       |
| 1                                                                    | 2007                             | "tags=25%, list=14%, signal=28%" |                                  |                       |
| GSE5503_PLN_DC_VS_SPLEEN_DC_ACTIVATED_ALLOGENIC_TCELL_DN             |                                  |                                  |                                  |                       |
| GSE5503_PLN_DC_VS_SPLEEN_DC_ACTIVATED_ALLOGENIC_TCELL_DN             |                                  |                                  |                                  |                       |
| 145                                                                  | 0.3124793                        | 1.2792999                        | 0.060796645                      |                       |
| 0.10152703                                                           | 1                                | 2223                             | "tags=31%, list=16%, signal=36%" |                       |
| GSE11864_UNTREATED_VS_CSF1_IN_MAC_DN                                 |                                  |                                  |                                  |                       |
| GSE11864_UNTREATED_VS_CSF1_IN_MAC_DN                                 |                                  |                                  |                                  | 116                   |
| 0.31989363                                                           | 1.2791822                        | 0.09131403                       | 0.10156936                       |                       |
| 1                                                                    | 2093                             | "tags=29%, list=15%, signal=34%" |                                  |                       |
| GSE37416_CTRL_VS_6H_F_TULARENSIS_LVS_NEUTROPHIL_DN                   |                                  |                                  |                                  |                       |
| GSE37416_CTRL_VS_6H_F_TULARENSIS_LVS_NEUTROPHIL_DN                   |                                  |                                  |                                  | 127                   |



|                                                                                |                                                                                |                                  |                                  |
|--------------------------------------------------------------------------------|--------------------------------------------------------------------------------|----------------------------------|----------------------------------|
| 0.3173269                                                                      | 1.2789466                                                                      | 0.074157305                      | 0.10173296                       |
| 1                                                                              | 2836                                                                           | "tags=34%, list=20%, signal=42%" |                                  |
| GSE12505_WT_VS_E2_2_HET_PDC_DN                                                 | GSE12505_WT_VS_E2_2_HET_PDC_DN                                                 |                                  |                                  |
| 115                                                                            | 0.3244711                                                                      | 1.2788435                        | 0.062240664                      |
| 0.10175317                                                                     | 1                                                                              | 1536                             | "tags=20%, list=11%, signal=22%" |
| GSE12484_HEALTHY_VS_PERIDONTITIS_NEUTROPHILS_DN                                | GSE12484_HEALTHY_VS_PERIDONTITIS_NEUTROPHILS_DN                                |                                  | 117                              |
| 0.31931335                                                                     | 1.2782909                                                                      | 0.060165975                      | 0.10220934                       |
| 1                                                                              | 2333                                                                           | "tags=29%, list=17%, signal=35%" |                                  |
| GSE27786_BCELL_VS_NEUTROPHIL_DN                                                | GSE27786_BCELL_VS_NEUTROPHIL_DN                                                |                                  |                                  |
| 148                                                                            | 0.31201857                                                                     | 1.2782125                        | 0.06962025                       |
| 0.10221567                                                                     | 1                                                                              | 2360                             | "tags=21%, list=17%, signal=25%" |
| GSE4748_CTRL_VS_LPS_AND_CYANOBACTERIUM_LP SLIKE_STIM_DC_3H_DN                  | GSE4748_CTRL_VS_LPS_AND_CYANOBACTERIUM_LP SLIKE_STIM_DC_3H_DN                  |                                  |                                  |
| 167                                                                            | 0.3003566                                                                      | 1.2782089                        | 0.046025105                      |
| 0.10216045                                                                     | 1                                                                              | 2292                             | "tags=24%, list=16%, signal=28%" |
| GSE360_HIGH_VS_LOW_DOSE_B_MALAYI_MAC_DN                                        | GSE360_HIGH_VS_LOW_DOSE_B_MALAYI_MAC_DN                                        |                                  | 154                              |
| 0.31028458                                                                     | 1.2779235                                                                      | 0.042035397                      | 0.10235351                       |
| 1                                                                              | 2081                                                                           | "tags=27%, list=15%, signal=31%" |                                  |
| GSE22432_CDC_VS_COMMON_DC_PROGENITOR_UP                                        | GSE22432_CDC_VS_COMMON_DC_PROGENITOR_UP                                        |                                  | 147                              |
| 0.3060167                                                                      | 1.2772461                                                                      | 0.040358745                      | 0.10291855                       |
| 1                                                                              | 2172                                                                           | "tags=28%, list=15%, signal=33%" |                                  |
| GSE15330_LYMPHOID_MULTIPOTENT_VS_GRANULOCYTE_MONOCYTE_PROGENITOR_IKA ROS_KO_DN | GSE15330_LYMPHOID_MULTIPOTENT_VS_GRANULOCYTE_MONOCYTE_PROGENITOR_IKA ROS_KO_DN |                                  |                                  |
| 160                                                                            | 0.30914572                                                                     | 1.2771609                        |                                  |
| 0.051229507                                                                    | 0.102925904                                                                    | 1                                | 1762                             |
| "tags=27%, list=12%, signal=30%"                                               |                                                                                |                                  |                                  |
| GSE3039_NKT_CELL_VS_B2_BCELL_UP                                                | GSE3039_NKT_CELL_VS_B2_BCELL_UP                                                |                                  |                                  |
| 146                                                                            | 0.30764076                                                                     | 1.2771553                        | 0.068085104                      |
| 0.1028675                                                                      | 1                                                                              | 1860                             | "tags=24%, list=13%, signal=27%" |
| GSE22432_UNTREATED_VS_TGFB1_TREATED_COMMON_DC_PROGENITOR_DN                    | GSE22432_UNTREATED_VS_TGFB1_TREATED_COMMON_DC_PROGENITOR_DN                    |                                  |                                  |
| 140                                                                            | 0.3101202                                                                      | 1.2767028                        | 0.05986696                       |
| 0.103213355                                                                    | 1                                                                              | 1795                             | "tags=24%, list=13%, signal=27%" |
| GSE10325_LUPUS_BCELL_VS_LUPUS_MYELOID_UP                                       | GSE10325_LUPUS_BCELL_VS_LUPUS_MYELOID_UP                                       |                                  | 130                              |
| 0.31401864                                                                     | 1.2764221                                                                      | 0.057569295                      | 0.103435226                      |
| 1                                                                              | 2094                                                                           | "tags=28%, list=15%, signal=32%" |                                  |
| GSE35685_CD34POS_CD38NEG_VS_CD34POS_CD10NEG_CD62LPOS_BONE_MARROW_DN            | GSE35685_CD34POS_CD38NEG_VS_CD34POS_CD10NEG_CD62LPOS_BONE_MARROW_DN            |                                  |                                  |
| 164                                                                            | 0.3029894                                                                      | 1.276321                         | 0.05785124                       |
| 0.10346833                                                                     | 1                                                                              | 2473                             | "tags=28%, list=18%, signal=34%" |
| GSE12845_PRE_GC_VS_DARKZONE_GC_TONSIL_BCELL_DN                                 | GSE12845_PRE_GC_VS_DARKZONE_GC_TONSIL_BCELL_DN                                 |                                  | 139                              |
| 0.30990356                                                                     | 1.2759354                                                                      | 0.048387095                      | 0.10376527                       |
| 1                                                                              | 2412                                                                           | "tags=35%, list=17%, signal=42%" |                                  |
| GSE20366_EX_VIVO_VS_DEC205_CONVERSION_UP                                       | GSE20366_EX_VIVO_VS_DEC205_CONVERSION_UP                                       |                                  | 138                              |
| 0.31005624                                                                     | 1.2756896                                                                      | 0.058212057                      | 0.103941746                      |
| 1                                                                              | 1780                                                                           | "tags=25%, list=13%, signal=28%" |                                  |
| GSE1432_6H_VS_24H_IFNG_MICROGLIA_UP                                            | GSE1432_6H_VS_24H_IFNG_MICROGLIA_UP                                            |                                  |                                  |

|                                                                 |                                   |                                  |                                  |             |
|-----------------------------------------------------------------|-----------------------------------|----------------------------------|----------------------------------|-------------|
| GSE1432_6H_VS_24H_IFNG_MICROGLIA_UP                             |                                   |                                  |                                  | 155         |
| 0.30563143                                                      | 1.2750304                         | 0.0554371                        |                                  | 0.10451878  |
| 1                                                               | 2445                              | "tags=32%, list=17%, signal=38%" |                                  |             |
| GSE360_DC_VS_MAC_B_MALAYI_HIGH_DOSE_DN                          |                                   |                                  |                                  |             |
| GSE360_DC_VS_MAC_B_MALAYI_HIGH_DOSE_DN                          |                                   |                                  | 143                              |             |
| 0.30976674                                                      | 1.2747774                         | 0.064                            | 0.104691274                      | 1           |
| 1793                                                            | "tags=24%, list=13%, signal=28%"  |                                  |                                  |             |
| GSE33292_DN3_THYMOCYTE_VS_TCELL_LYMPHOMA_FROM_TCF1_KO_UP        |                                   |                                  |                                  |             |
| GSE33292_DN3_THYMOCYTE_VS_TCELL_LYMPHOMA_FROM_TCF1_KO_UP        |                                   |                                  |                                  |             |
| 135                                                             | 0.31267434                        | 1.2743694                        | 0.06147541                       |             |
| 0.10499059                                                      | 1                                 | 2062                             | "tags=30%, list=15%, signal=34%" |             |
| GSE360_L_MAJOR_VS_M_TUBERCULOSIS_MAC_DN                         |                                   |                                  |                                  |             |
| GSE360_L_MAJOR_VS_M_TUBERCULOSIS_MAC_DN                         |                                   |                                  | 136                              |             |
| 0.3084623                                                       | 1.2735618                         | 0.0524109                        | 0.10568838                       |             |
| 1                                                               | 1850                              | "tags=25%, list=13%, signal=28%" |                                  |             |
| GSE16522_MEMORY_VS_NAIVE_CD8_TCELL_UP                           |                                   |                                  |                                  |             |
| GSE16522_MEMORY_VS_NAIVE_CD8_TCELL_UP                           |                                   |                                  | 152                              |             |
| 0.3093631                                                       | 1.2734454                         | 0.04684318                       | 0.10573403                       |             |
| 1                                                               | 1951                              | "tags=32%, list=14%, signal=36%" |                                  |             |
| GSE17721_PAM3CSK4_VS_CPG_16H_BMDC_DN                            |                                   |                                  |                                  |             |
| GSE17721_PAM3CSK4_VS_CPG_16H_BMDC_DN                            |                                   |                                  | 143                              |             |
| 0.30803388                                                      | 1.2734245                         | 0.052313883                      | 0.105687626                      |             |
| 1                                                               | 2011                              | "tags=25%, list=14%, signal=29%" |                                  |             |
| GSE3982_MEMORY_CD4_TCELL_VS_BCELL_UP                            |                                   |                                  |                                  |             |
| GSE3982_MEMORY_CD4_TCELL_VS_BCELL_UP                            |                                   |                                  | 132                              |             |
| 0.31190082                                                      | 1.2733029                         | 0.067073174                      | 0.10573933                       |             |
| 1                                                               | 1673                              | "tags=22%, list=12%, signal=25%" |                                  |             |
| GSE17721_LPS_VS_POLYIC_8H_BMDC_DN                               | GSE17721_LPS_VS_POLYIC_8H_BMDC_DN |                                  |                                  |             |
| 163                                                             | 0.30559996                        | 1.2730832                        | 0.06567796                       |             |
| 0.10588484                                                      | 1                                 | 1913                             | "tags=24%, list=14%, signal=27%" |             |
| GSE3982_MAST_CELL_VS_DC_UP                                      | GSE3982_MAST_CELL_VS_DC_UP        |                                  |                                  |             |
| 126                                                             | 0.31453332                        | 1.2722466                        | 0.074152544                      |             |
| 0.106586695                                                     | 1                                 | 1879                             | "tags=26%, list=13%, signal=30%" |             |
| GSE2826_WT_VS_XID_BCELL_UP                                      | GSE2826_WT_VS_XID_BCELL_UP        |                                  |                                  |             |
| 154                                                             | 0.30135828                        | 1.2720548                        | 0.06595745                       |             |
| 0.10668832                                                      | 1                                 | 1525                             | "tags=20%, list=11%, signal=22%" |             |
| GSE15330_HSC_VS_GRANULOCYTE_MONOCYTE_PROGENITOR_IKAROS_KO_DN    |                                   |                                  |                                  |             |
| GSE15330_HSC_VS_GRANULOCYTE_MONOCYTE_PROGENITOR_IKAROS_KO_DN    |                                   |                                  |                                  |             |
| 156                                                             | 0.30459565                        | 1.2718836                        | 0.061965812                      |             |
| 0.106779754                                                     | 1                                 | 1987                             | "tags=26%, list=14%, signal=30%" |             |
| GSE2770_UNTREATED_VS_TGFB_AND_IL12_TREATED_ACT_CD4_TCELL_48H_UP |                                   |                                  |                                  |             |
| GSE2770_UNTREATED_VS_TGFB_AND_IL12_TREATED_ACT_CD4_TCELL_48H_UP |                                   |                                  |                                  |             |
| 143                                                             | 0.30991292                        | 1.2714207                        | 0.072463766                      |             |
| 0.10715537                                                      | 1                                 | 2234                             | "tags=26%, list=16%, signal=30%" |             |
| GSE33425_CD161_HIGH_VS_NEG_CD8_TCELL_UP                         |                                   |                                  |                                  |             |
| GSE33425_CD161_HIGH_VS_NEG_CD8_TCELL_UP                         |                                   |                                  | 163                              |             |
| 0.30419898                                                      | 1.2708783                         | 0.05942623                       | 0.107617125                      |             |
| 1                                                               | 2317                              | "tags=31%, list=16%, signal=36%" |                                  |             |
| GSE34156_UNTREATED_VS_24H_NOD2_LIGAND_TREATED_MONOCYTE_DN       |                                   |                                  |                                  |             |
| GSE34156_UNTREATED_VS_24H_NOD2_LIGAND_TREATED_MONOCYTE_DN       |                                   |                                  |                                  |             |
| 139                                                             | 0.308764                          | 1.270331                         | 0.06324111                       | 0.108090125 |
| 1258                                                            | "tags=19%, list=9%, signal=20%"   |                                  |                                  |             |
| GSE27786_CD4_TCELL_VS_NEUTROPHIL_DN                             |                                   |                                  |                                  |             |
| GSE27786_CD4_TCELL_VS_NEUTROPHIL_DN                             |                                   |                                  | 143                              |             |

|                                                                               |            |                                  |                                  |
|-------------------------------------------------------------------------------|------------|----------------------------------|----------------------------------|
| 0.30974343                                                                    | 1.2700667  | 0.07581967                       | 0.10828474                       |
| 1                                                                             | 1736       | "tags=17%, list=12%, signal=19%" |                                  |
| GSE23308_CTRL_VS_CORTICOSTERONE_TREATED_MACROPHAGE_MINERALCORTICOID_REC_KO_DN |            |                                  |                                  |
| GSE23308_CTRL_VS_CORTICOSTERONE_TREATED_MACROPHAGE_MINERALCORTICOID_REC_KO_DN |            |                                  |                                  |
|                                                                               | 140        | 0.3071835                        | 1.2699479                        |
| 0.06625259                                                                    | 0.10833896 | 1                                | 2485                             |
| "tags=32%, list=18%, signal=39%"                                              |            |                                  |                                  |
| GSE41867_NAIVE_VS_DAY30_LCMV_CLONE13_EXHAUSTED_CD8_TCELL_DN                   |            |                                  |                                  |
| GSE41867_NAIVE_VS_DAY30_LCMV_CLONE13_EXHAUSTED_CD8_TCELL_DN                   |            |                                  |                                  |
| 147                                                                           | 0.30834192 | 1.269232                         | 0.06236559                       |
|                                                                               |            |                                  | 0.10897534                       |
| 1                                                                             | 2033       | "tags=26%, list=14%, signal=30%" |                                  |
| GSE20198_IL12_VS_IFNA_TREATED_ACT_CD4_TCELL_DN                                |            |                                  |                                  |
| GSE20198_IL12_VS_IFNA_TREATED_ACT_CD4_TCELL_DN                                |            |                                  |                                  |
|                                                                               |            |                                  | 127                              |
| 0.31277403                                                                    | 1.2691878  | 0.06860707                       | 0.10895387                       |
| 1                                                                             | 1433       | "tags=20%, list=10%, signal=23%" |                                  |
| GSE5142_CTRL_VS_HTERT_TRANSDUCECD8_TCELL_EARLY_PASSAGE_CLONE_DN               |            |                                  |                                  |
| GSE5142_CTRL_VS_HTERT_TRANSDUCECD8_TCELL_EARLY_PASSAGE_CLONE_DN               |            |                                  |                                  |
|                                                                               | 145        | 0.30721593                       | 1.2689874                        |
|                                                                               |            |                                  | 0.07070707                       |
| 0.10909777                                                                    | 1          | 2347                             | "tags=29%, list=17%, signal=34%" |
| GSE22103_UNSTIM_VS_LPS_STIM_NEUTROPHIL_DN                                     |            |                                  |                                  |
| GSE22103_UNSTIM_VS_LPS_STIM_NEUTROPHIL_DN                                     |            |                                  |                                  |
|                                                                               |            |                                  | 154                              |
| 0.30512923                                                                    | 1.2685648  | 0.07112971                       | 0.109457225                      |
| 1                                                                             | 672        | "tags=12%, list=5%, signal=12%"  |                                  |
| GSE17721_PAM3CSK4_VS_CPG_24H_BMDC_UP                                          |            |                                  |                                  |
| GSE17721_PAM3CSK4_VS_CPG_24H_BMDC_UP                                          |            |                                  |                                  |
|                                                                               |            |                                  | 152                              |
| 0.30941516                                                                    | 1.2671353  | 0.06904232                       | 0.11078211                       |
| 1                                                                             | 1824       | "tags=23%, list=13%, signal=26%" |                                  |
| GSE46242_TH1_VS_ANERGIC_TH1_CD4_TCELL_UP                                      |            |                                  |                                  |
| GSE46242_TH1_VS_ANERGIC_TH1_CD4_TCELL_UP                                      |            |                                  |                                  |
|                                                                               |            |                                  | 131                              |
| 0.30822605                                                                    | 1.2665051  | 0.07838983                       | 0.11134148                       |
| 1                                                                             | 2083       | "tags=29%, list=15%, signal=34%" |                                  |
| GSE17721_LPS_VS_GARDIQUIMOD_4H_BMDC_DN                                        |            |                                  |                                  |
| GSE17721_LPS_VS_GARDIQUIMOD_4H_BMDC_DN                                        |            |                                  |                                  |
|                                                                               |            |                                  | 136                              |
| 0.30860782                                                                    | 1.2664291  | 0.072765075                      | 0.11135275                       |
| 1                                                                             | 2107       | "tags=29%, list=15%, signal=33%" |                                  |
| GSE34156_NOD2_LIGAND_VS_TLR1_TLR2_LIGAND_24H_TREATED_MONOCYTE_UP              |            |                                  |                                  |
| GSE34156_NOD2_LIGAND_VS_TLR1_TLR2_LIGAND_24H_TREATED_MONOCYTE_UP              |            |                                  |                                  |
|                                                                               | 110        | 0.31904843                       | 1.2656043                        |
|                                                                               |            |                                  | 0.08742005                       |
| 0.11210091                                                                    | 1          | 1886                             | "tags=22%, list=13%, signal=25%" |
| GSE43700_UNTREATED_VS_IL10_TREATED_PBMC_DN                                    |            |                                  |                                  |
| GSE43700_UNTREATED_VS_IL10_TREATED_PBMC_DN                                    |            |                                  |                                  |
|                                                                               |            |                                  | 160                              |
| 0.30314296                                                                    | 1.2654026  | 0.055984557                      | 0.112227306                      |
| 1                                                                             | 2560       | "tags=32%, list=18%, signal=38%" |                                  |
| GSE17721_PAM3CSK4_VS_CPG_1H_BMDC_UP                                           |            |                                  |                                  |
| GSE17721_PAM3CSK4_VS_CPG_1H_BMDC_UP                                           |            |                                  |                                  |
|                                                                               |            |                                  | 153                              |
| 0.3060283                                                                     | 1.2649444  | 0.064449064                      | 0.11263059                       |
| 1                                                                             | 1628       | "tags=22%, list=12%, signal=25%" |                                  |
| GSE5589_IL6_KO_VS_IL10_KO_LPS_AND_IL10_STIM_MACROPHAGE_180MIN_UP              |            |                                  |                                  |
| GSE5589_IL6_KO_VS_IL10_KO_LPS_AND_IL10_STIM_MACROPHAGE_180MIN_UP              |            |                                  |                                  |
|                                                                               | 141        | 0.30351478                       | 1.2636676                        |
|                                                                               |            |                                  | 0.060165975                      |
| 0.11387212                                                                    | 1          | 1446                             | "tags=20%, list=10%, signal=22%" |
| GSE7852_LN_VS_FAT_TREG_UP                                                     |            |                                  |                                  |
| GSE7852_LN_VS_FAT_TREG_UP                                                     |            |                                  |                                  |
|                                                                               |            |                                  | 139                              |
| 0.30873787                                                                    | 1.263374   | 0.07974138                       | 0.11410907                       |
|                                                                               |            |                                  | 1                                |

2639 "tags=29%, list=19%, signal=35%"  
GSE5589\_UNSTIM\_VS\_45MIN\_LPS\_STIM\_MACROPHAGE\_DN  
GSE5589\_UNSTIM\_VS\_45MIN\_LPS\_STIM\_MACROPHAGE\_DN 142  
0.30721974 1.2631581 0.05672269 0.114252605  
1 2371 "tags=27%, list=17%, signal=33%"  
GSE2405\_0H\_VS\_9H\_A\_PHAGOCYTOPHILUM\_STIM\_NEUTROPHIL\_UP  
GSE2405\_0H\_VS\_9H\_A\_PHAGOCYTOPHILUM\_STIM\_NEUTROPHIL\_UP  
133 0.3068376 1.2630084 0.076595746  
0.11433119 1 2379 "tags=29%, list=17%, signal=35%"  
GSE29618\_MONOCYTE\_VS\_MDC\_DN GSE29618\_MONOCYTE\_VS\_MDC\_DN  
121 0.31469095 1.2628857 0.0751073  
0.11439596 1 2004 "tags=29%, list=14%, signal=33%"  
GSE37416\_12H\_VS\_24H\_F\_TULARENSIS\_LVS\_NEUTROPHIL\_UP  
GSE37416\_12H\_VS\_24H\_F\_TULARENSIS\_LVS\_NEUTROPHIL\_UP 142  
0.30509815 1.2627902 0.048565123 0.11441769  
1 2091 "tags=28%, list=15%, signal=33%"  
GSE28726\_NAIVE\_CD4\_TCELL\_VS\_NAIVE\_NKTCELL\_DN  
GSE28726\_NAIVE\_CD4\_TCELL\_VS\_NAIVE\_NKTCELL\_DN 161  
0.30421472 1.2622681 0.05957447 0.114857666  
1 1579 "tags=18%, list=11%, signal=20%"  
GSE1432\_1H\_VS\_24H\_IFNG\_MICROGLIA\_DN  
GSE1432\_1H\_VS\_24H\_IFNG\_MICROGLIA\_DN 132  
0.3105812 1.2621629 0.08547009 0.11490662  
1 2444 "tags=33%, list=17%, signal=39%"  
GSE17721\_LPS\_VS\_CPG\_0.5H\_BMDC\_DN GSE17721\_LPS\_VS\_CPG\_0.5H\_BMDC\_DN  
144 0.30538273 1.26188 0.069196425  
0.11513579 1 1924 "tags=20%, list=14%, signal=23%"  
GSE9960\_HEALTHY\_VS\_GRAM\_POS\_SEPSIS\_PBMC\_UP  
GSE9960\_HEALTHY\_VS\_GRAM\_POS\_SEPSIS\_PBMC\_UP 113  
0.3183103 1.2614979 0.08588957 0.11544856  
1 2887 "tags=36%, list=20%, signal=45%"  
GSE9988\_LPS\_VS\_LOW\_LPS\_MONOCYTE\_DN  
GSE9988\_LPS\_VS\_LOW\_LPS\_MONOCYTE\_DN 106  
0.32016954 1.2612611 0.08245243 0.11562196  
1 181 "tags=7%, list=1%, signal=7%"  
GSE17721\_12H\_VS\_24H\_PAM3CSK4\_BMDC\_DN  
GSE17721\_12H\_VS\_24H\_PAM3CSK4\_BMDC\_DN 162  
0.29721433 1.2612222 0.07905983 0.1156001  
1 1571 "tags=22%, list=11%, signal=24%"  
GSE15324\_ELF4\_KO\_VS\_WT\_ACTIVATED\_CD8\_TCELL\_DN  
GSE15324\_ELF4\_KO\_VS\_WT\_ACTIVATED\_CD8\_TCELL\_DN 145  
0.31100363 1.2606258 0.075 0.11614752 1  
2734 "tags=35%, list=19%, signal=43%"  
GSE26928\_EFF\_MEM\_VS\_CENTR\_MEM\_CD4\_TCELL\_UP  
GSE26928\_EFF\_MEM\_VS\_CENTR\_MEM\_CD4\_TCELL\_UP 126  
0.30946037 1.260119 0.082969435 0.11660748 1  
1226 "tags=19%, list=9%, signal=21%"  
GSE3691\_IFN\_PRODUCING\_KILLER\_DC\_VS\_PLASMACYTOID\_DC\_SPLEEN\_DN  
GSE3691\_IFN\_PRODUCING\_KILLER\_DC\_VS\_PLASMACYTOID\_DC\_SPLEEN\_DN  
137 0.30789816 1.2600249 0.065789476  
0.11664205 1 1023 "tags=14%, list=7%, signal=15%"  
GSE21670\_UNTREATED\_VS\_IL6\_TREATED\_STAT3\_KO\_CD4\_TCELL\_UP  
GSE21670\_UNTREATED\_VS\_IL6\_TREATED\_STAT3\_KO\_CD4\_TCELL\_UP  
152 0.30289346 1.2597669 0.07777778

|                                                               |                                  |                                  |                                  |             |
|---------------------------------------------------------------|----------------------------------|----------------------------------|----------------------------------|-------------|
| 0.116853125                                                   | 1                                | 2060                             | "tags=30%, list=15%, signal=34%" |             |
| GSE360_T_GONDII_VS_B_MALAYI_LOW_DOSE_MAC_UP                   |                                  |                                  |                                  |             |
| GSE360_T_GONDII_VS_B_MALAYI_LOW_DOSE_MAC_UP                   |                                  |                                  |                                  | 143         |
| 0.30781972                                                    | 1.2590877                        | 0.064989515                      |                                  | 0.11748422  |
| 1                                                             | 1536                             | "tags=21%, list=11%, signal=23%" |                                  |             |
| GSE17721_0.5H_VS_4H_PAM3CSK4_BMDC_DN                          |                                  |                                  |                                  |             |
| GSE17721_0.5H_VS_4H_PAM3CSK4_BMDC_DN                          |                                  |                                  |                                  | 141         |
| 0.3065217                                                     | 1.2587904                        | 0.1026694                        |                                  | 0.11771931  |
| 1                                                             | 2128                             | "tags=27%, list=15%, signal=31%" |                                  |             |
| GSE46606_IRF4_KO_VS_WT_CD40L_IL2_IL5_3DAY_STIMULATED_BCELL_UP |                                  |                                  |                                  |             |
| GSE46606_IRF4_KO_VS_WT_CD40L_IL2_IL5_3DAY_STIMULATED_BCELL_UP |                                  |                                  |                                  |             |
|                                                               | 141                              | 0.30264828                       | 1.258705                         | 0.06326531  |
| 0.1177446                                                     | 1                                | 1706                             | "tags=19%, list=12%, signal=22%" |             |
| GSE12392_WT_VS_IFNB_KO_CD8A_POS_SPLEEN_DC_UP                  |                                  |                                  |                                  |             |
| GSE12392_WT_VS_IFNB_KO_CD8A_POS_SPLEEN_DC_UP                  |                                  |                                  |                                  | 148         |
| 0.30469173                                                    | 1.2583443                        | 0.09307359                       |                                  | 0.11803787  |
| 1                                                             | 2296                             | "tags=31%, list=16%, signal=37%" |                                  |             |
| GSE37301_LYMPHOID_PRIMED_MPP_VS_COMMON_LYMPHOID_PROGENITOR_UP |                                  |                                  |                                  |             |
| GSE37301_LYMPHOID_PRIMED_MPP_VS_COMMON_LYMPHOID_PROGENITOR_UP |                                  |                                  |                                  |             |
|                                                               | 160                              | 0.29953298                       | 1.25819                          | 0.056962024 |
| 0.11813621                                                    | 1                                | 1211                             | "tags=14%, list=9%, signal=16%"  |             |
| GSE22443_NAIVE_VS_ACT_AND_IL12_TREATED_CD8_TCELL_DN           |                                  |                                  |                                  |             |
| GSE22443_NAIVE_VS_ACT_AND_IL12_TREATED_CD8_TCELL_DN           |                                  |                                  |                                  |             |
| 135                                                           | 0.30376035                       | 1.2581364                        |                                  | 0.067391306 |
| 0.118136406                                                   | 1                                | 1657                             | "tags=20%, list=12%, signal=22%" |             |
| GSE27786_LIN_NEG_VS_NKTCELL_DN                                |                                  |                                  |                                  |             |
| GSE27786_LIN_NEG_VS_NKTCELL_DN                                |                                  |                                  |                                  |             |
|                                                               | 154                              | 0.30515537                       | 1.2576265                        | 0.059196617 |
| 0.11860613                                                    | 1                                | 2045                             | "tags=27%, list=14%, signal=31%" |             |
| GSE2770_TGFB_AND_IL4_ACT_VS_ACT_CD4_TCELL_2H_UP               |                                  |                                  |                                  |             |
| GSE2770_TGFB_AND_IL4_ACT_VS_ACT_CD4_TCELL_2H_UP               |                                  |                                  |                                  | 119         |
| 0.31435746                                                    | 1.2575773                        | 0.08559499                       |                                  | 0.11858156  |
| 1                                                             | 1811                             | "tags=26%, list=13%, signal=30%" |                                  |             |
| GSE17721_POLYIC_VS_GARDIQUIMOD_6H_BMDC_UP                     |                                  |                                  |                                  |             |
| GSE17721_POLYIC_VS_GARDIQUIMOD_6H_BMDC_UP                     |                                  |                                  |                                  | 159         |
| 0.30135015                                                    | 1.2569587                        | 0.07597536                       |                                  | 0.119183466 |
| 1                                                             | 1863                             | "tags=24%, list=13%, signal=27%" |                                  |             |
| GSE19941_UNSTIM_VS_LPS_STIM_IL10_KO_MACROPHAGE_DN             |                                  |                                  |                                  |             |
| GSE19941_UNSTIM_VS_LPS_STIM_IL10_KO_MACROPHAGE_DN             |                                  |                                  |                                  | 136         |
| 0.3058174                                                     | 1.256589                         | 0.07608695                       | 0.11953114                       | 1           |
| 2311                                                          | "tags=30%, list=16%, signal=36%" |                                  |                                  |             |
| GSE40277_GATA1_AND_SATB1_TRANSDUCE_VS_CTRL_CD4_TCELL_UP       |                                  |                                  |                                  |             |
| GSE40277_GATA1_AND_SATB1_TRANSDUCE_VS_CTRL_CD4_TCELL_UP       |                                  |                                  |                                  |             |
| 144                                                           | 0.30309635                       | 1.2558273                        |                                  | 0.058455113 |
| 0.12026809                                                    | 1                                | 2129                             | "tags=28%, list=15%, signal=32%" |             |
| GSE3982_NEUTROPHIL_VS_TH1_UP                                  |                                  |                                  |                                  |             |
| GSE3982_NEUTROPHIL_VS_TH1_UP                                  |                                  |                                  |                                  |             |
|                                                               | 136                              | 0.3049756                        | 1.2552007                        | 0.09913793  |
| 0.120846555                                                   | 1                                | 2145                             | "tags=24%, list=15%, signal=27%" |             |
| GSE360_LOW_DOSE_B_MALAYI_VS_M_TUBERCULOSIS_MAC_DN             |                                  |                                  |                                  |             |
| GSE360_LOW_DOSE_B_MALAYI_VS_M_TUBERCULOSIS_MAC_DN             |                                  |                                  |                                  | 154         |
| 0.29780456                                                    | 1.2547917                        | 0.061023623                      |                                  | 0.12122628  |
| 1                                                             | 2266                             | "tags=27%, list=16%, signal=32%" |                                  |             |
| GSE14769_UNSTIM_VS_60MIN_LPS_BMDM_UP                          |                                  |                                  |                                  |             |
| GSE14769_UNSTIM_VS_60MIN_LPS_BMDM_UP                          |                                  |                                  |                                  | 138         |
| 0.30711362                                                    | 1.2545704                        | 0.07966457                       |                                  | 0.12139047  |

|                                                                        |                                  |                                  |                                  |             |
|------------------------------------------------------------------------|----------------------------------|----------------------------------|----------------------------------|-------------|
| 1                                                                      | 2060                             | "tags=30%, list=15%, signal=35%" |                                  |             |
| GSE11864_UNTREATED_VS_CSF1_IN_MAC_UP                                   |                                  |                                  |                                  |             |
| GSE11864_UNTREATED_VS_CSF1_IN_MAC_UP                                   |                                  |                                  |                                  |             |
| 0.31452087                                                             | 1.2540379                        | 0.09127789                       | 124                              | 0.12188452  |
| 1                                                                      | 2548                             | "tags=31%, list=18%, signal=37%" |                                  |             |
| GSE42088_2H_VS_24H_LEISHMANIA_INF_DC_DN                                |                                  |                                  |                                  |             |
| GSE42088_2H_VS_24H_LEISHMANIA_INF_DC_DN                                |                                  |                                  |                                  |             |
| 0.30870667                                                             | 1.2535607                        | 0.08035714                       | 138                              | 0.122329935 |
| 1                                                                      | 2121                             | "tags=18%, list=15%, signal=21%" |                                  |             |
| GSE3982_CTRL_VS_IGE_STIM_MAST_CELL_UP                                  |                                  |                                  |                                  |             |
| GSE3982_CTRL_VS_IGE_STIM_MAST_CELL_UP                                  |                                  |                                  |                                  |             |
| 0.3097727                                                              | 1.2531627                        | 0.085020244                      | 133                              | 0.122683905 |
| 1                                                                      | 2641                             | "tags=31%, list=19%, signal=38%" |                                  |             |
| GSE2128_CTRL_VS_MIMETOPE_NEGATIVE_SELECTION_DP_THYMOCYTE_C57BL6_DN     |                                  |                                  |                                  |             |
| GSE2128_CTRL_VS_MIMETOPE_NEGATIVE_SELECTION_DP_THYMOCYTE_C57BL6_DN     |                                  |                                  |                                  |             |
| 149                                                                    | 0.30509323                       | 1.2530224                        | 153                              | 0.06396589  |
| 0.12277252                                                             | 1                                | 1868                             | "tags=19%, list=13%, signal=22%" |             |
| GSE29164_DAY3_VS_DAY7_CD8_TCELL_TREATED_MELANOMA_UP                    |                                  |                                  |                                  |             |
| GSE29164_DAY3_VS_DAY7_CD8_TCELL_TREATED_MELANOMA_UP                    |                                  |                                  |                                  |             |
| 131                                                                    | 0.30644405                       | 1.2528428                        | 153                              | 0.079166666 |
| 0.12289235                                                             | 1                                | 2002                             | "tags=23%, list=14%, signal=26%" |             |
| GSE45365_NK_CELL_VS_CD8_TCELL_MCMV_INFECTIION_UP                       |                                  |                                  |                                  |             |
| GSE45365_NK_CELL_VS_CD8_TCELL_MCMV_INFECTIION_UP                       |                                  |                                  |                                  |             |
| 0.30018988                                                             | 1.2527524                        | 0.09014675                       | 153                              | 0.12293052  |
| 1                                                                      | 2350                             | "tags=35%, list=17%, signal=42%" |                                  |             |
| GSE5589_LPS_VS_LPS_AND_IL6_STIM_MACROPHAGE_45MIN_DN                    |                                  |                                  |                                  |             |
| GSE5589_LPS_VS_LPS_AND_IL6_STIM_MACROPHAGE_45MIN_DN                    |                                  |                                  |                                  |             |
| 154                                                                    | 0.30234823                       | 1.252668                         | 153                              | 0.061965812 |
| 0.12294022                                                             | "tags=34%, list=18%, signal=41%" |                                  |                                  |             |
| GSE45365_NK_CELL_VS_CD11B_DC_MCMV_INFECTIION_DN                        |                                  |                                  |                                  |             |
| GSE45365_NK_CELL_VS_CD11B_DC_MCMV_INFECTIION_DN                        |                                  |                                  |                                  |             |
| 0.29981837                                                             | 1.2521265                        | 0.08367347                       | 155                              | 0.12342656  |
| 1                                                                      | 1840                             | "tags=23%, list=13%, signal=26%" |                                  |             |
| GSE34156_UNTREATED_VS_6H_NOD2_AND_TLR1_TLR2_LIGAND_TREATED_MONOCYTE_DN |                                  |                                  |                                  |             |
| GSE34156_UNTREATED_VS_6H_NOD2_AND_TLR1_TLR2_LIGAND_TREATED_MONOCYTE_DN |                                  |                                  |                                  |             |
| 113                                                                    | 0.31787646                       | 1.25183                          | 153                              | 0.10526316  |
| 0.123636656                                                            | 1                                | 2354                             | "tags=38%, list=17%, signal=45%" |             |
| GSE17721_CTRL_VS_CPG_6H_BMDC_DN                                        |                                  |                                  |                                  |             |
| GSE17721_CTRL_VS_CPG_6H_BMDC_DN                                        |                                  |                                  |                                  |             |
| 165                                                                    | 0.29566315                       | 1.25173                          | 153                              | 0.072210066 |
| 0.1236771                                                              | 1                                | 2420                             | "tags=25%, list=17%, signal=30%" |             |
| GSE30083_SP2_VS_SP3_THYMOCYTE_DN                                       |                                  |                                  |                                  |             |
| GSE30083_SP2_VS_SP3_THYMOCYTE_DN                                       |                                  |                                  |                                  |             |
| 152                                                                    | 0.3014977                        | 1.2517059                        | 153                              | 0.067940556 |
| 0.123627454                                                            | 1                                | 1539                             | "tags=21%, list=11%, signal=23%" |             |
| GSE20198_UNTREATED_VS_IL12_TREATED_ACT_CD4_TCELL_UP                    |                                  |                                  |                                  |             |
| GSE20198_UNTREATED_VS_IL12_TREATED_ACT_CD4_TCELL_UP                    |                                  |                                  |                                  |             |
| 137                                                                    | 0.29981616                       | 1.2509464                        | 153                              | 0.07112971  |
| 0.1243985                                                              | 1                                | 2641                             | "tags=31%, list=19%, signal=38%" |             |
| GSE19923_E2A_KO_VS_E2A_AND_HEB_KO_DP_THYMOCYTE_DN                      |                                  |                                  |                                  |             |
| GSE19923_E2A_KO_VS_E2A_AND_HEB_KO_DP_THYMOCYTE_DN                      |                                  |                                  |                                  |             |
| 0.2988532                                                              | 1.250161                         | 0.05773196                       | 165                              | 0.12519836  |
| 1293                                                                   | "tags=22%, list=9%, signal=24%"  |                                  |                                  |             |
| GSE17721_LPS_VS_POLYIC_0.5H_BMDC_UP                                    |                                  |                                  |                                  |             |
| GSE17721_LPS_VS_POLYIC_0.5H_BMDC_UP                                    |                                  |                                  |                                  |             |
|                                                                        |                                  |                                  | 166                              |             |

|                                                                  |                                  |                                  |                                  |             |
|------------------------------------------------------------------|----------------------------------|----------------------------------|----------------------------------|-------------|
| 0.29562762                                                       | 1.249752                         | 0.07064018                       | 0.12557548                       | 1           |
| 2250                                                             | "tags=25%, list=16%, signal=30%" |                                  |                                  |             |
| GSE36392_EOSINOPHIL_VS_MAC_IL25_TREATED_LUNG_DN                  |                                  |                                  |                                  |             |
| GSE36392_EOSINOPHIL_VS_MAC_IL25_TREATED_LUNG_DN                  |                                  |                                  |                                  | 136         |
| 0.30557117                                                       | 1.2491279                        | 0.06958251                       | 0.1261739                        |             |
| 1                                                                | 2148                             | "tags=26%, list=15%, signal=30%" |                                  |             |
| GSE4590_SMALL_VS_VPREB_POS_LARGE_PRE_BCELL_DN                    |                                  |                                  |                                  |             |
| GSE4590_SMALL_VS_VPREB_POS_LARGE_PRE_BCELL_DN                    |                                  |                                  |                                  | 124         |
| 0.3098576                                                        | 1.2488581                        | 0.08713693                       | 0.12638737                       |             |
| 1                                                                | 2646                             | "tags=30%, list=19%, signal=36%" |                                  |             |
| GSE38681_WT_VS_LYL1_KO_LYMPHOID_PRIMED_MULTIPOTENT_PROGENITOR_DN |                                  |                                  |                                  |             |
| GSE38681_WT_VS_LYL1_KO_LYMPHOID_PRIMED_MULTIPOTENT_PROGENITOR_DN |                                  |                                  |                                  |             |
|                                                                  | 157                              | 0.29785642                       | 1.2486587                        | 0.07186858  |
| 0.1265299                                                        | 1                                | 2229                             | "tags=34%, list=16%, signal=40%" |             |
| GSE17721_CTRL_VS_PAM3CSK4_24H_BMDC_DN                            |                                  |                                  |                                  |             |
| GSE17721_CTRL_VS_PAM3CSK4_24H_BMDC_DN                            |                                  |                                  |                                  | 155         |
| 0.29558572                                                       | 1.2478787                        | 0.074324325                      | 0.1272679                        |             |
| 1                                                                | 1855                             | "tags=24%, list=13%, signal=27%" |                                  |             |
| GSE16522_MEMORY_VS_NAIVE_ANTI_CD3CD28_STIM_CD8_TCELL_UP          |                                  |                                  |                                  |             |
| GSE16522_MEMORY_VS_NAIVE_ANTI_CD3CD28_STIM_CD8_TCELL_UP          |                                  |                                  |                                  |             |
| 158                                                              | 0.29808548                       | 1.247467                         | 0.058189657                      | 0.12765089  |
| 1                                                                | 1684                             | "tags=25%, list=12%, signal=28%" |                                  |             |
| GSE13484_UNSTIM_VS_3H_YF17D_VACCINE_STIM_PBMC_DN                 |                                  |                                  |                                  |             |
| GSE13484_UNSTIM_VS_3H_YF17D_VACCINE_STIM_PBMC_DN                 |                                  |                                  |                                  | 152         |
| 0.30010766                                                       | 1.2473054                        | 0.08008658                       | 0.12774876                       |             |
| 1                                                                | 2608                             | "tags=33%, list=18%, signal=40%" |                                  |             |
| GSE17721_4_VS_24H_GARDIQUIMOD_BMDC_UP                            |                                  |                                  |                                  |             |
| GSE17721_4_VS_24H_GARDIQUIMOD_BMDC_UP                            |                                  |                                  |                                  | 158         |
| 0.2972959                                                        | 1.2468934                        | 0.05                             | 0.12810615                       | 1           |
| 2177                                                             | "tags=28%, list=15%, signal=33%" |                                  |                                  |             |
| GSE42021_CD24HI_VS_CD24LOW_TREG_THYMUS_UP                        |                                  |                                  |                                  |             |
| GSE42021_CD24HI_VS_CD24LOW_TREG_THYMUS_UP                        |                                  |                                  |                                  | 140         |
| 0.30240145                                                       | 1.2467796                        | 0.06736842                       | 0.12815925                       |             |
| 1                                                                | 2400                             | "tags=29%, list=17%, signal=34%" |                                  |             |
| GSE3039_ALPHABETA_CD8_TCELL_VS_B1_BCELL_DN                       |                                  |                                  |                                  |             |
| GSE3039_ALPHABETA_CD8_TCELL_VS_B1_BCELL_DN                       |                                  |                                  |                                  | 146         |
| 0.30144924                                                       | 1.2466831                        | 0.063318774                      | 0.1281774                        |             |
| 1                                                                | 2786                             | "tags=32%, list=20%, signal=39%" |                                  |             |
| GSE28449_WT_VS_LRF_KO_GERMINAL_CENTER_BCELL_DN                   |                                  |                                  |                                  |             |
| GSE28449_WT_VS_LRF_KO_GERMINAL_CENTER_BCELL_DN                   |                                  |                                  |                                  | 135         |
| 0.3048122                                                        | 1.2464917                        | 0.08154506                       | 0.12829345                       |             |
| 1                                                                | 1845                             | "tags=21%, list=13%, signal=24%" |                                  |             |
| GSE27786_CD4_TCELL_VS_ERYTHTROBLAST_DN                           |                                  |                                  |                                  |             |
| GSE27786_CD4_TCELL_VS_ERYTHTROBLAST_DN                           |                                  |                                  |                                  | 135         |
| 0.30339715                                                       | 1.2464799                        | 0.11060948                       | 0.1282342                        |             |
| 1                                                                | 1409                             | "tags=12%, list=10%, signal=13%" |                                  |             |
| GSE11961_FOLLICULAR_BCELL_VS_MEMORY_BCELL_DAY7_DN                |                                  |                                  |                                  |             |
| GSE11961_FOLLICULAR_BCELL_VS_MEMORY_BCELL_DAY7_DN                |                                  |                                  |                                  | 134         |
| 0.30599478                                                       | 1.246181                         | 0.09128631                       | 0.12847501                       | 1           |
| 2742                                                             | "tags=31%, list=19%, signal=39%" |                                  |                                  |             |
| GSE19888_ADENOSINE_A3R_INH_VS_TCELL_MEMBRANES_ACT_MAST_CELL_DN   |                                  |                                  |                                  |             |
| GSE19888_ADENOSINE_A3R_INH_VS_TCELL_MEMBRANES_ACT_MAST_CELL_DN   |                                  |                                  |                                  |             |
|                                                                  | 138                              | 0.3009759                        | 1.2461386                        | 0.079229124 |
| 0.12845317                                                       | 1                                | 2002                             | "tags=20%, list=14%, signal=23%" |             |

|                                                                       |                                  |                                  |                                  |                                  |
|-----------------------------------------------------------------------|----------------------------------|----------------------------------|----------------------------------|----------------------------------|
| GSE17721_CTRL_VS_CPG_2H_BMDC_UP                                       | GSE17721_CTRL_VS_CPG_2H_BMDC_UP  |                                  |                                  |                                  |
| 141                                                                   | 0.3042394                        | 1.245865                         | 0.06048387                       |                                  |
| 0.1286665                                                             | 1                                | 1967                             | "tags=23%, list=14%, signal=27%" |                                  |
| GSE17721_0.5H_VS_24H_PAM3CSK4_BMDC_DN                                 |                                  |                                  |                                  |                                  |
| GSE17721_0.5H_VS_24H_PAM3CSK4_BMDC_DN                                 |                                  |                                  | 151                              |                                  |
| 0.2986845                                                             | 1.2456787                        | 0.070866145                      | 0.12879272                       |                                  |
| 1                                                                     | 2011                             | "tags=22%, list=14%, signal=25%" |                                  |                                  |
| GSE17721_12H_VS_24H_PAM3CSK4_BMDC_UP                                  |                                  |                                  |                                  |                                  |
| GSE17721_12H_VS_24H_PAM3CSK4_BMDC_UP                                  |                                  |                                  | 146                              |                                  |
| 0.29977813                                                            | 1.2454828                        | 0.08722109                       | 0.12893474                       |                                  |
| 1                                                                     | 2372                             | "tags=30%, list=17%, signal=36%" |                                  |                                  |
| GSE25088_IL4_VS_IL4_AND_ROSIGLITAZONE_STIM_MACROPHAGE_DAY10_DN        |                                  |                                  |                                  |                                  |
| GSE25088_IL4_VS_IL4_AND_ROSIGLITAZONE_STIM_MACROPHAGE_DAY10_DN        |                                  |                                  |                                  |                                  |
| 152                                                                   | 0.29831204                       | 1.2450984                        | 0.07709251                       |                                  |
| 0.12930436                                                            | 1                                | 1737                             | "tags=21%, list=12%, signal=24%" |                                  |
| GSE3982_MAST_CELL_VS_MAC_DN                                           | GSE3982_MAST_CELL_VS_MAC_DN      |                                  |                                  |                                  |
| 151                                                                   | 0.29714355                       | 1.244904                         | 0.072765075                      |                                  |
| 0.12944597                                                            | 1                                | 1908                             | "tags=21%, list=14%, signal=24%" |                                  |
| GSE25087_TREG_VS_TCONV_ADULT_UP                                       | GSE25087_TREG_VS_TCONV_ADULT_UP  |                                  |                                  |                                  |
| 147                                                                   | 0.3005185                        | 1.2443322                        | 0.08113591                       |                                  |
| 0.12998757                                                            | 1                                | 1738                             | "tags=25%, list=12%, signal=28%" |                                  |
| GSE26928_EFF_MEMORY_VS_CXCR5_POS_CD4_TCELL_UP                         |                                  |                                  |                                  |                                  |
| GSE26928_EFF_MEMORY_VS_CXCR5_POS_CD4_TCELL_UP                         |                                  |                                  | 119                              |                                  |
| 0.31056473                                                            | 1.244236                         | 0.10204082                       | 0.13002643                       | 1                                |
| 2575                                                                  | "tags=24%, list=18%, signal=30%" |                                  |                                  |                                  |
| GSE24972_WT_VS_IRF8_KO_SPLEEN_FOLLICULAR_BCELL_DN                     |                                  |                                  |                                  |                                  |
| GSE24972_WT_VS_IRF8_KO_SPLEEN_FOLLICULAR_BCELL_DN                     |                                  |                                  | 134                              |                                  |
| 0.3049223                                                             | 1.2441516                        | 0.07709251                       | 0.13004404                       |                                  |
| 1                                                                     | 2290                             | "tags=31%, list=16%, signal=36%" |                                  |                                  |
| GSE46242_TH1_VS_ANERGIC_TH1_CD4_TCELL_WITH_EGR2_DELETED_DN            |                                  |                                  |                                  |                                  |
| GSE46242_TH1_VS_ANERGIC_TH1_CD4_TCELL_WITH_EGR2_DELETED_DN            |                                  |                                  |                                  |                                  |
| 130                                                                   | 0.3052497                        | 1.2441272                        | 0.0952381                        |                                  |
| 0.13000007                                                            | 1                                | 1375                             | "tags=18%, list=10%, signal=20%" |                                  |
| GSE17721_CTRL_VS_PAM3CSK4_2H_BMDC_UP                                  |                                  |                                  |                                  |                                  |
| GSE17721_CTRL_VS_PAM3CSK4_2H_BMDC_UP                                  |                                  |                                  | 140                              |                                  |
| 0.3053586                                                             | 1.2440169                        | 0.08583691                       | 0.13003331                       |                                  |
| 1                                                                     | 2217                             | "tags=28%, list=16%, signal=33%" |                                  |                                  |
| GSE32164_RESTING_DIFFERENTIATED_VS_ALTERNATIVELY_ACT_M2_MACROPHAGE_DN |                                  |                                  |                                  |                                  |
| GSE32164_RESTING_DIFFERENTIATED_VS_ALTERNATIVELY_ACT_M2_MACROPHAGE_DN |                                  |                                  |                                  |                                  |
| 149                                                                   | 0.30036974                       | 1.2440118                        |                                  |                                  |
| 0.06732673                                                            | 0.12996745                       | 1                                | 1621                             | "tags=21%, list=11%, signal=24%" |
| GSE2770_IL12_VS_IL4_TREATED_ACT_CD4_TCELL_6H_UP                       |                                  |                                  |                                  |                                  |
| GSE2770_IL12_VS_IL4_TREATED_ACT_CD4_TCELL_6H_UP                       |                                  |                                  | 148                              |                                  |
| 0.3009552                                                             | 1.2439266                        | 0.063917525                      | 0.12998423                       |                                  |
| 1                                                                     | 2970                             | "tags=30%, list=21%, signal=38%" |                                  |                                  |
| GSE19401_UNSTIM_VS_PAM2CSK4_STIM_FOLLICULAR_DC_DN                     |                                  |                                  |                                  |                                  |
| GSE19401_UNSTIM_VS_PAM2CSK4_STIM_FOLLICULAR_DC_DN                     |                                  |                                  | 146                              |                                  |
| 0.2998678                                                             | 1.2438575                        | 0.077568136                      | 0.12998784                       |                                  |
| 1                                                                     | 2462                             | "tags=34%, list=17%, signal=41%" |                                  |                                  |
| GSE3039_CD4_TCELL_VS_ALPHABETA_CD8_TCELL_DN                           |                                  |                                  |                                  |                                  |
| GSE3039_CD4_TCELL_VS_ALPHABETA_CD8_TCELL_DN                           |                                  |                                  | 146                              |                                  |
| 0.296295                                                              | 1.2434665                        | 0.07777778                       | 0.1303532                        | 1                                |



1852 "tags=25%, list=13%, signal=28%"  
 GSE37301\_COMMON\_LYMPHOID\_PROGENITOR\_VS\_GRAN\_MONO\_PROGENITOR\_UP  
 GSE37301\_COMMON\_LYMPHOID\_PROGENITOR\_VS\_GRAN\_MONO\_PROGENITOR\_UP  
 145 0.29909742 1.2434641 0.07494646  
 0.130282 1 2089 "tags=26%, list=15%, signal=30%"  
 GSE15330\_WT\_VS\_IKAROS\_KO\_LYMPHOID\_MULTIPOTENT\_PROGENITOR\_UP  
 GSE15330\_WT\_VS\_IKAROS\_KO\_LYMPHOID\_MULTIPOTENT\_PROGENITOR\_UP  
 152 0.29768902 1.2430798 0.07882883  
 0.13061579 1 2421 "tags=34%, list=17%, signal=40%"  
 GSE44649\_NAIVE\_VS\_ACTIVATED\_CD8\_TCELL\_UP  
 GSE44649\_NAIVE\_VS\_ACTIVATED\_CD8\_TCELL\_UP 158  
 0.29443446 1.242721 0.07645875 0.13091867 1  
 2589 "tags=30%, list=18%, signal=36%"  
 GSE13738\_RESTING\_VS\_TCR\_ACTIVATED\_CD4\_TCELL\_DN  
 GSE13738\_RESTING\_VS\_TCR\_ACTIVATED\_CD4\_TCELL\_DN 144  
 0.30584282 1.2427206 0.097510375 0.13084461  
 1 2337 "tags=31%, list=17%, signal=36%"  
 GSE2770\_UNTREATED\_VS\_IL12\_TREATED\_ACT\_CD4\_TCELL\_6H\_DN  
 GSE2770\_UNTREATED\_VS\_IL12\_TREATED\_ACT\_CD4\_TCELL\_6H\_DN  
 146 0.30150855 1.241811 0.09259259 0.13176602  
 1 2530 "tags=30%, list=18%, signal=36%"  
 GSE27786\_LSK\_VS\_CD4\_TCELL\_DN GSE27786\_LSK\_VS\_CD4\_TCELL\_DN  
 128 0.3088986 1.2408834 0.09775967  
 0.13277262 1 2528 "tags=30%, list=18%, signal=37%"  
 GSE43955\_1H\_VS\_20H\_ACT\_CD4\_TCELL\_DN  
 GSE43955\_1H\_VS\_20H\_ACT\_CD4\_TCELL\_DN 156  
 0.29612648 1.2406758 0.08225108 0.13291739  
 1 2222 "tags=22%, list=16%, signal=26%"  
 GSE27786\_CD4\_TCELL\_VS\_NKTCELL\_UP GSE27786\_CD4\_TCELL\_VS\_NKTCELL\_UP  
 145 0.3060528 1.2396097 0.095744684  
 0.13402985 1 2021 "tags=23%, list=14%, signal=27%"  
 GSE37534\_GW1929\_VS\_PIOGLITAZONE\_TREATED\_CD4\_TCELL\_PPARG1\_FOXP3\_TRANS  
 DUCED\_DN  
 GSE37534\_GW1929\_VS\_PIOGLITAZONE\_TREATED\_CD4\_TCELL\_PPARG1\_FOXP3\_TRANS  
 DUCED\_DN 147 0.3023118 1.2395074  
 0.062240664 0.13407354 1 2080 "tags=27%,  
 list=15%, signal=32%"  
 GSE3039\_ALPHAALPHA\_VS\_ALPHABETA\_CD8\_TCELL\_UP  
 GSE3039\_ALPHAALPHA\_VS\_ALPHABETA\_CD8\_TCELL\_UP 146  
 0.30263585 1.2394418 0.093023255 0.13407357  
 1 2301 "tags=33%, list=16%, signal=39%"  
 GSE12392\_WT\_VS\_IFNAR\_KO\_CD8A\_NEG\_SPLEEN\_DC\_UP  
 GSE12392\_WT\_VS\_IFNAR\_KO\_CD8A\_NEG\_SPLEEN\_DC\_UP 150  
 0.30215776 1.2393837 0.08742005 0.13405763  
 1 2489 "tags=31%, list=18%, signal=38%"  
 GSE2770\_TGFB\_AND\_IL4\_VS\_IL4\_TREATED\_ACT\_CD4\_TCELL\_6H\_DN  
 GSE2770\_TGFB\_AND\_IL4\_VS\_IL4\_TREATED\_ACT\_CD4\_TCELL\_6H\_DN  
 137 0.3025419 1.2386403 0.07974138  
 0.13483968 1 2520 "tags=30%, list=18%, signal=36%"  
 GSE24671\_CTRL\_VS\_BAKIMULC\_INFECTED\_MOUSE\_SPLENOCYTES\_UP  
 GSE24671\_CTRL\_VS\_BAKIMULC\_INFECTED\_MOUSE\_SPLENOCYTES\_UP  
 138 0.30371603 1.2383717 0.086065575  
 0.13505921 1 2351 "tags=33%, list=17%, signal=40%"  
 GSE411\_WT\_VS\_SOCS3\_KO\_MACROPHAGE\_IL6\_STIM\_100MIN\_DN

GSE411\_WT\_VS\_SOCS3\_KO\_MACROPHAGE\_IL6\_STIM\_100MIN\_DN  
132 0.30011842 1.2374406 0.07272727  
0.13603435 1 2175 "tags=28%, list=15%, signal=33%"  
GSE14350\_IL2RB\_KO\_VS\_WT\_TEFF\_DN GSE14350\_IL2RB\_KO\_VS\_WT\_TEFF\_DN  
135 0.30393648 1.2371274 0.08982036  
0.136336 1 2382 "tags=31%, list=17%, signal=37%"  
GSE45365\_NK\_CELL\_VS\_BCELL\_MCMV\_INFECTION\_DN  
GSE45365\_NK\_CELL\_VS\_BCELL\_MCMV\_INFECTION\_DN 144  
0.29701552 1.2370043 0.106299214 0.13639721  
1 2354 "tags=29%, list=17%, signal=35%"  
GSE17721\_POLYIC\_VS\_GARDIQUIMOD\_4H\_BMDC\_DN  
GSE17721\_POLYIC\_VS\_GARDIQUIMOD\_4H\_BMDC\_DN 149  
0.29915923 1.2367744 0.08050848 0.13658273  
1 2053 "tags=25%, list=15%, signal=29%"  
GSE5463\_CTRL\_VS\_DEXAMETHASONE\_TREATED\_THYMOCYTE\_DN  
GSE5463\_CTRL\_VS\_DEXAMETHASONE\_TREATED\_THYMOCYTE\_DN 151  
0.29871643 1.2366251 0.07021277 0.1366808  
1 2424 "tags=32%, list=17%, signal=38%"  
GSE22611\_UNSTIM\_VS\_2H\_MDP\_STIM\_NOD2\_TRANSDUCED\_HEK293T\_CELL\_DN  
GSE22611\_UNSTIM\_VS\_2H\_MDP\_STIM\_NOD2\_TRANSDUCED\_HEK293T\_CELL\_DN  
133 0.30307648 1.2364395 0.092402466  
0.13681372 1 1694 "tags=20%, list=12%, signal=22%"  
GSE27786\_NKCELL\_VS\_MONO\_MAC\_UP GSE27786\_NKCELL\_VS\_MONO\_MAC\_UP  
144 0.30142772 1.236104 0.08595388  
0.13710654 1 1771 "tags=25%, list=13%, signal=28%"  
GSE19401\_PAM2CSK4\_VS\_RETINOIC\_ACID\_AND\_PAM2CSK4\_STIM\_FOLLICULAR\_DC\_D  
N  
GSE19401\_PAM2CSK4\_VS\_RETINOIC\_ACID\_AND\_PAM2CSK4\_STIM\_FOLLICULAR\_DC\_D  
N 149 0.2960576 1.2357358  
0.08730159 0.1374633 1 1933 "tags=26%,  
list=14%, signal=30%"  
GSE4535\_BM\_DERIVED\_DC\_VS\_FOLLICULAR\_DC\_UP  
GSE4535\_BM\_DERIVED\_DC\_VS\_FOLLICULAR\_DC\_UP 153  
0.30113474 1.2349526 0.08742005 0.13833347  
1 2128 "tags=29%, list=15%, signal=33%"  
GSE14350\_TREG\_VS\_TEFF\_DN GSE14350\_TREG\_VS\_TEFF\_DN 153  
0.29583308 1.2347782 0.08991228 0.1384491  
1 2036 "tags=18%, list=14%, signal=20%"  
GSE24210\_TCONV\_VS\_TREG\_DN GSE24210\_TCONV\_VS\_TREG\_DN 146  
0.30005744 1.2344582 0.07658643 0.13873412  
1 806 "tags=10%, list=6%, signal=10%"  
GSE33292\_DN3\_THYMOCYTE\_VS\_TCF1\_KO\_TCELL\_LYMPHOMA\_DN  
GSE33292\_DN3\_THYMOCYTE\_VS\_TCF1\_KO\_TCELL\_LYMPHOMA\_DN  
117 0.31105584 1.2343646 0.111788616 0.13877  
1 2047 "tags=21%, list=15%, signal=24%"  
GSE6269\_FLU\_VS\_E\_COLI\_INF\_PBMC\_DN GSE6269\_FLU\_VS\_E\_COLI\_INF\_PBMC\_DN  
104 0.3161322 1.2341621 0.120162934  
0.1389254 1 2475 "tags=21%, list=18%, signal=25%"  
GSE18893\_CTRL\_VS\_TNF\_TREATED\_TREG\_24H\_DN  
GSE18893\_CTRL\_VS\_TNF\_TREATED\_TREG\_24H\_DN 141  
0.3023956 1.2338763 0.08951965 0.1391678  
1 1881 "tags=22%, list=13%, signal=25%"  
GSE42088\_UNINF\_VS\_LEISHMANIA\_INF\_DC\_2H\_DN  
GSE42088\_UNINF\_VS\_LEISHMANIA\_INF\_DC\_2H\_DN 120

|                                                                    |                                  |                                  |                                  |
|--------------------------------------------------------------------|----------------------------------|----------------------------------|----------------------------------|
| 0.30004832                                                         | 1.2335987                        | 0.0809628                        | 0.13942868                       |
| 1                                                                  | 2419                             | "tags=28%, list=17%, signal=34%" |                                  |
| GSE17721_LPS_VS_PAM3CSK4_8H_BMDC_UP                                |                                  |                                  |                                  |
| GSE17721_LPS_VS_PAM3CSK4_8H_BMDC_UP                                |                                  |                                  |                                  |
|                                                                    |                                  | 156                              |                                  |
| 0.29346886                                                         | 1.2332711                        | 0.0754717                        | 0.13974519                       |
| 1                                                                  | 1264                             | "tags=17%, list=9%, signal=19%"  |                                  |
| GSE4748_LPS_VS_LPS_AND_CYANOBACTERIUM_LPSLIKE_STIM_DC_3H_DN        |                                  |                                  |                                  |
| GSE4748_LPS_VS_LPS_AND_CYANOBACTERIUM_LPSLIKE_STIM_DC_3H_DN        |                                  |                                  |                                  |
| 102                                                                | 0.3124662                        | 1.233095                         | 0.10526316                       |
|                                                                    |                                  | 0.13985848                       |                                  |
| 1                                                                  | 1590                             | "tags=17%, list=11%, signal=19%" |                                  |
| GSE17721_0.5H_VS_12H_LPS_BMDC_DN                                   |                                  |                                  |                                  |
| GSE17721_0.5H_VS_12H_LPS_BMDC_DN                                   |                                  |                                  |                                  |
|                                                                    | 157                              | 0.2945279                        | 1.2328018                        |
|                                                                    |                                  | 0.08730159                       |                                  |
| 0.1401346                                                          | 1                                | 2588                             | "tags=31%, list=18%, signal=37%" |
| GSE37416_CTRL_VS_12H_F_TULARENSIS_LVS_NEUTROPHIL_DN                |                                  |                                  |                                  |
| GSE37416_CTRL_VS_12H_F_TULARENSIS_LVS_NEUTROPHIL_DN                |                                  |                                  |                                  |
| 126                                                                | 0.30408686                       | 1.232685                         | 0.09034908                       |
|                                                                    |                                  | 0.14019914                       |                                  |
| 1                                                                  | 2536                             | "tags=32%, list=18%, signal=38%" |                                  |
| GSE29618_PRE_VS_DAY7_FLU_VACCINE_BCELL_UP                          |                                  |                                  |                                  |
| GSE29618_PRE_VS_DAY7_FLU_VACCINE_BCELL_UP                          |                                  |                                  |                                  |
|                                                                    |                                  | 142                              |                                  |
| 0.3012322                                                          | 1.2325612                        | 0.1039823                        | 0.14026345                       |
| 1                                                                  | 2078                             | "tags=18%, list=15%, signal=21%" |                                  |
| GSE1460_CD4_THYMOCYTE_VS_NAIVE_CD4_TCELL_ADULT_BLOOD_UP            |                                  |                                  |                                  |
| GSE1460_CD4_THYMOCYTE_VS_NAIVE_CD4_TCELL_ADULT_BLOOD_UP            |                                  |                                  |                                  |
| 157                                                                | 0.29942238                       | 1.2323734                        | 0.08074534                       |
| 0.14041853                                                         | 1                                | 2272                             | "tags=32%, list=16%, signal=38%" |
| GSE29618_LAIV_VS_TIV_FLU_VACCINE_DAY7_MDC_UP                       |                                  |                                  |                                  |
| GSE29618_LAIV_VS_TIV_FLU_VACCINE_DAY7_MDC_UP                       |                                  |                                  |                                  |
|                                                                    |                                  | 142                              |                                  |
| 0.2959893                                                          | 1.2319812                        | 0.08571429                       | 0.14078237                       |
| 1                                                                  | 1157                             | "tags=18%, list=8%, signal=20%"  |                                  |
| GSE4590_LARGE_PRE_BCELL_VS_VPREB_POS_LARGE_PRE_BCELL_UP            |                                  |                                  |                                  |
| GSE4590_LARGE_PRE_BCELL_VS_VPREB_POS_LARGE_PRE_BCELL_UP            |                                  |                                  |                                  |
| 135                                                                | 0.30120987                       | 1.2315105                        | 0.08471075                       |
| 0.1412941                                                          | 1                                | 1667                             | "tags=27%, list=12%, signal=31%" |
| GSE32423_MEMORY_VS_NAIVE_CD8_TCELL_IL7_IL4_DN                      |                                  |                                  |                                  |
| GSE32423_MEMORY_VS_NAIVE_CD8_TCELL_IL7_IL4_DN                      |                                  |                                  |                                  |
|                                                                    |                                  | 127                              |                                  |
| 0.30239806                                                         | 1.2312675                        | 0.102970295                      | 0.14150247                       |
| 1                                                                  | 2240                             | "tags=31%, list=16%, signal=36%" |                                  |
| GSE360_L_DONOVANI_VS_M_TUBERCULOSIS_MAC_UP                         |                                  |                                  |                                  |
| GSE360_L_DONOVANI_VS_M_TUBERCULOSIS_MAC_UP                         |                                  |                                  |                                  |
|                                                                    |                                  | 148                              |                                  |
| 0.29424945                                                         | 1.2310641                        | 0.08997955                       | 0.14168373                       |
| 1                                                                  | 2015                             | "tags=24%, list=14%, signal=27%" |                                  |
| GSE18281_CORTICAL_THYMOCYTE_VS_WHOLE_CORTEX_THYMUS_DN              |                                  |                                  |                                  |
| GSE18281_CORTICAL_THYMOCYTE_VS_WHOLE_CORTEX_THYMUS_DN              |                                  |                                  |                                  |
| 140                                                                | 0.2977891                        | 1.2306057                        | 0.1137339                        |
| 0.14216405                                                         | 1                                | 2720                             | "tags=29%, list=19%, signal=36%" |
| GSE20198_IL12_VS_IL12_IL18_TREATED_ACT_CD4_TCELL_UP                |                                  |                                  |                                  |
| GSE20198_IL12_VS_IL12_IL18_TREATED_ACT_CD4_TCELL_UP                |                                  |                                  |                                  |
| 145                                                                | 0.29783234                       | 1.230193                         | 0.09375                          |
|                                                                    |                                  | 0.1425711                        | 1                                |
| 1675                                                               | "tags=24%, list=12%, signal=27%" |                                  |                                  |
| GSE40274_FOXP3_VS_FOXP3_AND_XBP1_TRANSDUCED_ACTIVATED_CD4_TCELL_UP |                                  |                                  |                                  |
| GSE40274_FOXP3_VS_FOXP3_AND_XBP1_TRANSDUCED_ACTIVATED_CD4_TCELL_UP |                                  |                                  |                                  |
|                                                                    | 104                              | 0.31337768                       | 1.2301334                        |
|                                                                    |                                  | 0.10433071                       |                                  |
| 0.14254941                                                         | 1                                | 1552                             | "tags=15%, list=11%, signal=17%" |
| GSE1448_ANTI_VALPHA2_VS_VBETA5_DP_THYMOCYTE_DN                     |                                  |                                  |                                  |

|                                                              |                                  |                                  |                                  |             |
|--------------------------------------------------------------|----------------------------------|----------------------------------|----------------------------------|-------------|
| GSE1448_ANTI_VALPHA2_VS_VBETA5_DP_THYMOCYTE_DN               |                                  |                                  |                                  | 158         |
| 0.293716                                                     | 1.2295793                        | 0.10021322                       | 0.1431008                        | 1           |
| 2041                                                         | "tags=24%, list=14%, signal=28%" |                                  |                                  |             |
| GSE19374_UNINF_VS_LISTERIA_INFECTED_MACROPHAGE_DN            |                                  |                                  |                                  |             |
| GSE19374_UNINF_VS_LISTERIA_INFECTED_MACROPHAGE_DN            |                                  |                                  |                                  | 139         |
| 0.2992624                                                    | 1.2295291                        | 0.09836066                       | 0.14308463                       |             |
| 1                                                            | 1915                             | "tags=22%, list=14%, signal=25%" |                                  |             |
| GSE21927_BALBC_VS_C57BL6_MONOCYTE_SPLEEN_DN                  |                                  |                                  |                                  |             |
| GSE21927_BALBC_VS_C57BL6_MONOCYTE_SPLEEN_DN                  |                                  |                                  |                                  | 107         |
| 0.30939844                                                   | 1.2290694                        | 0.10838446                       | 0.14357848                       |             |
| 1                                                            | 2325                             | "tags=29%, list=16%, signal=34%" |                                  |             |
| GSE18281_SUBCAPSULAR_VS_CENTRAL_CORTICAL_REGION_OF_THYMUS_UP |                                  |                                  |                                  |             |
| GSE18281_SUBCAPSULAR_VS_CENTRAL_CORTICAL_REGION_OF_THYMUS_UP |                                  |                                  |                                  |             |
|                                                              | 121                              | 0.30214205                       | 1.2289736                        | 0.084632516 |
| 0.14362071                                                   | 1                                | 2474                             | "tags=33%, list=18%, signal=40%" |             |
| GSE21927_UNTREATED_VS_GMCSF_GCSF_TREATED_BONE_MARROW_DN      |                                  |                                  |                                  |             |
| GSE21927_UNTREATED_VS_GMCSF_GCSF_TREATED_BONE_MARROW_DN      |                                  |                                  |                                  |             |
| 125                                                          | 0.3057477                        | 1.2289358                        | 0.08418891                       |             |
| 0.14358944                                                   | 1                                | 2194                             | "tags=29%, list=16%, signal=34%" |             |
| GSE27786_LIN_NEG_VS_MONO_MAC_UP                              |                                  |                                  |                                  |             |
| GSE27786_LIN_NEG_VS_MONO_MAC_UP                              |                                  |                                  |                                  |             |
|                                                              | 137                              | 0.29718822                       | 1.2284698                        | 0.083333336 |
| 0.14404118                                                   | 1                                | 2792                             | "tags=34%, list=20%, signal=41%" |             |
| GSE22886_IGG_IGA_MEMORY_BCELL_VS_BM_PLASMA_CELL_UP           |                                  |                                  |                                  |             |
| GSE22886_IGG_IGA_MEMORY_BCELL_VS_BM_PLASMA_CELL_UP           |                                  |                                  |                                  | 135         |
| 0.29953605                                                   | 1.2278277                        | 0.103792414                      | 0.14475253                       |             |
| 1                                                            | 2126                             | "tags=30%, list=15%, signal=35%" |                                  |             |
| GSE21927_SPLEEN_MONOCYTE_VS_GMCSF_GCSF_BONE_MARROW_DN        |                                  |                                  |                                  |             |
| GSE21927_SPLEEN_MONOCYTE_VS_GMCSF_GCSF_BONE_MARROW_DN        |                                  |                                  |                                  |             |
| 124                                                          | 0.3023788                        | 1.2275503                        | 0.09832636                       |             |
| 0.14500523                                                   | 1                                | 2146                             | "tags=27%, list=15%, signal=31%" |             |
| GSE22935_UNSTIM_VS_12H_MBOVIS_BCG_STIM_MACROPHAGE_UP         |                                  |                                  |                                  |             |
| GSE22935_UNSTIM_VS_12H_MBOVIS_BCG_STIM_MACROPHAGE_UP         |                                  |                                  |                                  |             |
| 140                                                          | 0.29917413                       | 1.2275325                        | 0.090361446                      |             |
| 0.14494333                                                   | 1                                | 1571                             | "tags=21%, list=11%, signal=23%" |             |
| GSE11961_GERMINAL_CENTER_BCELL_DAY7_VS_MEMORY_BCELL_DAY40_UP |                                  |                                  |                                  |             |
| GSE11961_GERMINAL_CENTER_BCELL_DAY7_VS_MEMORY_BCELL_DAY40_UP |                                  |                                  |                                  |             |
|                                                              | 143                              | 0.2972527                        | 1.227049                         | 0.08723404  |
| 0.14543764                                                   | 1                                | 1248                             | "tags=18%, list=9%, signal=20%"  |             |
| GSE1791_CTRL_VS_NEUROMEDINU_IN_T_CELL_LINE_3H_DN             |                                  |                                  |                                  |             |
| GSE1791_CTRL_VS_NEUROMEDINU_IN_T_CELL_LINE_3H_DN             |                                  |                                  |                                  | 120         |
| 0.30023083                                                   | 1.2269697                        | 0.093023255                      | 0.14546205                       |             |
| 1                                                            | 1555                             | "tags=18%, list=11%, signal=20%" |                                  |             |
| GSE14000_UNSTIM_VS_16H_LPS_DC_DN                             |                                  |                                  |                                  |             |
| GSE14000_UNSTIM_VS_16H_LPS_DC_DN                             |                                  |                                  |                                  |             |
|                                                              | 142                              | 0.2988975                        | 1.226774                         | 0.12555066  |
| 0.1456174                                                    | 1                                | 2453                             | "tags=33%, list=17%, signal=40%" |             |
| GSE21063_CTRL_VS_ANTI_IGM_STIM_BCELL_NFATC1_KO_16H_UP        |                                  |                                  |                                  |             |
| GSE21063_CTRL_VS_ANTI_IGM_STIM_BCELL_NFATC1_KO_16H_UP        |                                  |                                  |                                  |             |
| 151                                                          | 0.29632136                       | 1.2260842                        | 0.09484536                       |             |
| 0.14640653                                                   | 1                                | 2224                             | "tags=28%, list=16%, signal=33%" |             |
| GSE17974_IL4_AND_ANTI_IL12_VS_UNTREATED_48H_ACT_CD4_TCELL_DN |                                  |                                  |                                  |             |
| GSE17974_IL4_AND_ANTI_IL12_VS_UNTREATED_48H_ACT_CD4_TCELL_DN |                                  |                                  |                                  |             |
|                                                              | 122                              | 0.30654907                       | 1.2258307                        | 0.11195446  |
| 0.14663222                                                   | 1                                | 1650                             | "tags=26%, list=12%, signal=29%" |             |
| GSE37301_LYMPHOID_PRIMED_MPP_VS_RAG2_KO_NK_CELL_UP           |                                  |                                  |                                  |             |

|                                                                                 |                                  |                                  |            |                                  |
|---------------------------------------------------------------------------------|----------------------------------|----------------------------------|------------|----------------------------------|
| GSE37301_LYMPHOID_PRIMED_MPP_VS_RAG2_KO_NK_CELL_UP                              |                                  |                                  |            | 157                              |
| 0.29318565                                                                      | 1.2258092                        | 0.09594883                       | 0.14657237 |                                  |
| 1                                                                               | 1950                             | "tags=28%, list=14%, signal=32%" |            |                                  |
| GSE23695_CD57_POS_VS_NEG_NK_CELL_UP                                             |                                  |                                  |            |                                  |
| GSE23695_CD57_POS_VS_NEG_NK_CELL_UP                                             |                                  |                                  |            | 134                              |
| 0.30086407                                                                      | 1.2252625                        | 0.10085837                       | 0.14717568 |                                  |
| 1                                                                               | 1990                             | "tags=27%, list=14%, signal=31%" |            |                                  |
| GSE20715_0H_VS_48H_OZONE_LUNG_UP                                                |                                  |                                  |            |                                  |
| GSE20715_0H_VS_48H_OZONE_LUNG_UP                                                |                                  |                                  |            |                                  |
| 0.1477853                                                                       | 1                                | 1610                             | 1.2247277  | 0.08946322                       |
|                                                                                 |                                  |                                  |            | "tags=20%, list=11%, signal=22%" |
| GSE39820_CTRL_VS_TGFBETA1_IL6_CD4_TCELL_UP                                      |                                  |                                  |            |                                  |
| GSE39820_CTRL_VS_TGFBETA1_IL6_CD4_TCELL_UP                                      |                                  |                                  |            | 149                              |
| 0.29615662                                                                      | 1.2245454                        | 0.0982906                        | 0.14791423 |                                  |
| 1                                                                               | 2037                             | "tags=26%, list=14%, signal=29%" |            |                                  |
| GSE22886_NAIVE_CD8_TCELL_VS_NKCELL_DN                                           |                                  |                                  |            |                                  |
| GSE22886_NAIVE_CD8_TCELL_VS_NKCELL_DN                                           |                                  |                                  |            | 138                              |
| 0.2986885                                                                       | 1.2240489                        | 0.09756097                       | 0.14843489 |                                  |
| 1                                                                               | 1902                             | "tags=24%, list=13%, signal=27%" |            |                                  |
| GSE12392_IFNAR_KO_VS_IFNB_KO_CD8_NEG_SPLEEN_DC_DN                               |                                  |                                  |            |                                  |
| GSE12392_IFNAR_KO_VS_IFNB_KO_CD8_NEG_SPLEEN_DC_DN                               |                                  |                                  |            | 161                              |
| 0.2961982                                                                       | 1.2239311                        | 0.10195228                       | 0.14850254 |                                  |
| 1                                                                               | 1536                             | "tags=22%, list=11%, signal=24%" |            |                                  |
| GSE3982_EOSINOPHIL_VS_DC_DN                                                     |                                  |                                  |            |                                  |
| GSE3982_EOSINOPHIL_VS_DC_DN                                                     |                                  |                                  |            |                                  |
| 0.14853194                                                                      | 1                                | 2283                             | 1.223835   | 0.09978308                       |
|                                                                                 |                                  |                                  |            | "tags=28%, list=16%, signal=33%" |
| GSE17721_POLYIC_VS_PAM3CSK4_6H_BMDC_UP                                          |                                  |                                  |            |                                  |
| GSE17721_POLYIC_VS_PAM3CSK4_6H_BMDC_UP                                          |                                  |                                  |            | 155                              |
| 0.29512805                                                                      | 1.2233037                        | 0.09033614                       | 0.1490705  |                                  |
| 1                                                                               | 2552                             | "tags=26%, list=18%, signal=31%" |            |                                  |
| GSE17721_POLYIC_VS_PAM3CSK4_8H_BMDC_UP                                          |                                  |                                  |            |                                  |
| GSE17721_POLYIC_VS_PAM3CSK4_8H_BMDC_UP                                          |                                  |                                  |            | 153                              |
| 0.28839156                                                                      | 1.2230159                        | 0.08865979                       | 0.14933282 |                                  |
| 1                                                                               | 2249                             | "tags=27%, list=16%, signal=32%" |            |                                  |
| GSE16385_IL4_VS_ROSIGLITAZONE_STIM_MACROPHAGE_UP                                |                                  |                                  |            |                                  |
| GSE16385_IL4_VS_ROSIGLITAZONE_STIM_MACROPHAGE_UP                                |                                  |                                  |            | 139                              |
| 0.297518                                                                        | 1.2222455                        | 0.099585064                      | 0.1502371  | 1                                |
| 2359                                                                            | "tags=33%, list=17%, signal=39%" |                                  |            |                                  |
| GSE14000_4H_VS_16H_LPS_DC_DN                                                    |                                  |                                  |            |                                  |
| GSE14000_4H_VS_16H_LPS_DC_DN                                                    |                                  |                                  |            |                                  |
| 0.15102297                                                                      | 1                                | 2642                             | 1.2215146  | 0.09791667                       |
|                                                                                 |                                  |                                  |            | "tags=33%, list=19%, signal=41%" |
| GSE3203_UNTREATED_VS_IFNB_TREATED_LN_BCELL_UP                                   |                                  |                                  |            |                                  |
| GSE3203_UNTREATED_VS_IFNB_TREATED_LN_BCELL_UP                                   |                                  |                                  |            | 146                              |
| 0.29488313                                                                      | 1.2214174                        | 0.09414226                       | 0.15106593 |                                  |
| 1                                                                               | 2431                             | "tags=27%, list=17%, signal=33%" |            |                                  |
| GSE39820_CTRL_VS_TGFBETA3_IL6_CD4_TCELL_UP                                      |                                  |                                  |            |                                  |
| GSE39820_CTRL_VS_TGFBETA3_IL6_CD4_TCELL_UP                                      |                                  |                                  |            | 150                              |
| 0.2920228                                                                       | 1.2211576                        | 0.10560345                       | 0.15131    | 1                                |
| 2104                                                                            | "tags=29%, list=15%, signal=33%" |                                  |            |                                  |
| GSE5679_CTRL_VS_PPARG_LIGAND_ROSIGLITAZONE_AND_RARA_AGONIST_AM580_TREATED_DC_UP |                                  |                                  |            |                                  |
| GSE5679_CTRL_VS_PPARG_LIGAND_ROSIGLITAZONE_AND_RARA_AGONIST_AM580_TREATED_DC_UP |                                  |                                  |            |                                  |
| 0.08154506                                                                      | 0.15156195                       | 1                                | 2239       | "tags=33%, list=16%, signal=38%" |

GSE16522\_ANTI\_CD3CD28\_STIM\_VS\_UNSTIM\_MEMORY\_CD8\_TCELL\_UP  
GSE16522\_ANTI\_CD3CD28\_STIM\_VS\_UNSTIM\_MEMORY\_CD8\_TCELL\_UP  
149 0.29052627 1.2207538 0.09775967  
0.15166931 1 1967 "tags=23%, list=14%, signal=26%"  
GSE20715\_0H\_VS\_24H\_OZONE\_TLR4\_KO\_LUNG\_DN  
GSE20715\_0H\_VS\_24H\_OZONE\_TLR4\_KO\_LUNG\_DN 167  
0.28597173 1.2203522 0.08436214 0.1520923  
1 2367 "tags=23%, list=17%, signal=28%"  
GSE360\_CTRL\_VS\_L\_DONOVANI\_MAC\_DN GSE360\_CTRL\_VS\_L\_DONOVANI\_MAC\_DN  
158 0.2909611 1.2196324 0.10666667  
0.15286985 1 2414 "tags=27%, list=17%, signal=32%"  
GSE17721\_CPG\_VS\_GARDIQUIMOD\_24H\_BMDC\_DN  
GSE17721\_CPG\_VS\_GARDIQUIMOD\_24H\_BMDC\_DN 152  
0.2933474 1.2193586 0.095744684 0.1531283  
1 2011 "tags=25%, list=14%, signal=29%"  
GSE6259\_CD4\_TCELL\_VS\_CD8\_TCELL\_UP GSE6259\_CD4\_TCELL\_VS\_CD8\_TCELL\_UP  
144 0.2955754 1.2189714 0.09746589  
0.15350375 1 393 "tags=8%, list=3%, signal=8%"  
GSE12366\_NAIVE\_VS\_MEMORY\_BCELL\_DN GSE12366\_NAIVE\_VS\_MEMORY\_BCELL\_DN  
139 0.29202473 1.2189511 0.1018711  
0.15344776 1 1964 "tags=25%, list=14%, signal=29%"  
GSE2770\_TGFB\_AND\_IL4\_ACT\_VS\_ACT\_CD4\_TCELL\_48H\_UP  
GSE2770\_TGFB\_AND\_IL4\_ACT\_VS\_ACT\_CD4\_TCELL\_48H\_UP 142  
0.2981145 1.21862 0.09615385 0.15378372 1  
2296 "tags=29%, list=16%, signal=34%"  
GSE369\_PRE\_VS\_POST\_IL6\_INJECTION\_IFNG\_WT\_LIVER\_DN  
GSE369\_PRE\_VS\_POST\_IL6\_INJECTION\_IFNG\_WT\_LIVER\_DN 156  
0.29272956 1.2182215 0.08836207 0.15417251  
1 2091 "tags=29%, list=15%, signal=33%"  
GSE17721\_POLYIC\_VS\_CPG\_6H\_BMDC\_UP GSE17721\_POLYIC\_VS\_CPG\_6H\_BMDC\_UP  
159 0.29026625 1.2181824 0.10515873  
0.15413608 1 2421 "tags=28%, list=17%, signal=33%"  
GSE1740\_UNSTIM\_VS\_IFNA\_STIMULATED\_MCSF\_IFNG\_DERIVED\_MACROPHAGE\_UP  
GSE1740\_UNSTIM\_VS\_IFNA\_STIMULATED\_MCSF\_IFNG\_DERIVED\_MACROPHAGE\_UP  
102 0.31177607 1.2181145 0.1278826  
0.15414117 1 1482 "tags=16%, list=11%, signal=17%"  
GSE25088\_ROSIGLITAZONE\_VS\_IL4\_AND\_ROSIGLITAZONE\_STIM\_STAT6\_KO\_MACROP  
HAGE\_DAY10\_UP  
GSE25088\_ROSIGLITAZONE\_VS\_IL4\_AND\_ROSIGLITAZONE\_STIM\_STAT6\_KO\_MACROP  
HAGE\_DAY10\_UP 131 0.29775628 1.2179147  
0.1 0.15430121 1 1909 "tags=25%, list=14%,  
signal=29%"  
GSE36888\_STAT5\_AB\_KNOCKIN\_VS\_WT\_TCELL\_IL2\_TREATED\_6H\_UP  
GSE36888\_STAT5\_AB\_KNOCKIN\_VS\_WT\_TCELL\_IL2\_TREATED\_6H\_UP  
143 0.29491988 1.2177973 0.12343096  
0.1543479 1 1737 "tags=23%, list=12%, signal=26%"  
GSE22601\_IMMATURE\_CD4\_SINGLE\_POSITIVE\_VS\_CD8\_SINGLE\_POSITIVE\_THYMOCY  
TE\_UP  
GSE22601\_IMMATURE\_CD4\_SINGLE\_POSITIVE\_VS\_CD8\_SINGLE\_POSITIVE\_THYMOCY  
TE\_UP 152 0.29429105 1.2171177  
0.08884297 0.1551312 1 2347 "tags=33%,  
list=17%, signal=39%"  
GSE4984\_LPS\_VS\_VEHICLE\_CTRL\_TREATED\_DC\_DN  
GSE4984\_LPS\_VS\_VEHICLE\_CTRL\_TREATED\_DC\_DN 139

0.2936133 1.217104 0.11464968 0.15506308 1  
1366 "tags=20%, list=10%, signal=22%"  
GSE19401\_NAIVE\_VS\_IMMUNIZED\_MOUSE\_PLN\_FOLLICULAR\_DC\_DN  
GSE19401\_NAIVE\_VS\_IMMUNIZED\_MOUSE\_PLN\_FOLLICULAR\_DC\_DN  
141 0.29511997 1.2170099 0.09915612  
0.15509722 1 2239 "tags=25%, list=16%, signal=29%"  
GSE10325\_LUPUS\_BCELL\_VS\_LUPUS\_MYELOID\_DN  
GSE10325\_LUPUS\_BCELL\_VS\_LUPUS\_MYELOID\_DN 153  
0.29164654 1.2169558 0.094412334 0.15508112  
1 1917 "tags=23%, list=14%, signal=26%"  
GSE32255\_WT\_UNSTIM\_VS\_JMJD2D\_KNOCKDOWN\_4H\_LPS\_STIM\_DC\_UP  
GSE32255\_WT\_UNSTIM\_VS\_JMJD2D\_KNOCKDOWN\_4H\_LPS\_STIM\_DC\_UP  
145 0.29309112 1.2168695 0.07628866  
0.15509838 1 1936 "tags=25%, list=14%, signal=28%"  
GSE5589\_LPS\_VS\_LPS\_AND\_IL10\_STIM\_MACROPHAGE\_45MIN\_DN  
GSE5589\_LPS\_VS\_LPS\_AND\_IL10\_STIM\_MACROPHAGE\_45MIN\_DN  
138 0.2953835 1.2160267 0.12090164  
0.15609968 1 2093 "tags=22%, list=15%, signal=26%"  
GSE1432\_CTRL\_VS\_IFNG\_1H\_MICROGLIA\_DN  
GSE1432\_CTRL\_VS\_IFNG\_1H\_MICROGLIA\_DN 140  
0.29335845 1.2154075 0.09775967 0.15679549  
1 2356 "tags=28%, list=17%, signal=33%"  
GSE27786\_LSK\_VS\_BCELL\_UP GSE27786\_LSK\_VS\_BCELL\_UP 140  
0.29743996 1.2149075 0.10421286 0.15736018  
1 1942 "tags=24%, list=14%, signal=28%"  
GSE18281\_MEDULLARY\_THYMOCYTE\_VS\_WHOLE\_MEDULLA\_THYMUS\_UP  
GSE18281\_MEDULLARY\_THYMOCYTE\_VS\_WHOLE\_MEDULLA\_THYMUS\_UP  
133 0.29609507 1.2148342 0.11020408  
0.15736693 1 1904 "tags=27%, list=13%, signal=31%"  
GSE11924\_TH1\_VS\_TH2\_CD4\_TCELL\_UP GSE11924\_TH1\_VS\_TH2\_CD4\_TCELL\_UP  
138 0.2970049 1.2142062 0.1090535  
0.15808956 1 2010 "tags=23%, list=14%, signal=27%"  
GSE17721\_LPS\_VS\_GARDIQUIMOD\_8H\_BMDC\_UP  
GSE17721\_LPS\_VS\_GARDIQUIMOD\_8H\_BMDC\_UP 160  
0.28884682 1.2133441 0.08067941 0.15910794  
1 1087 "tags=14%, list=8%, signal=15%"  
GSE26669\_CD4\_VS\_CD8\_TCELL\_IN\_MLR\_COSTIM\_BLOCK\_UP  
GSE26669\_CD4\_VS\_CD8\_TCELL\_IN\_MLR\_COSTIM\_BLOCK\_UP 134  
0.2925993 1.2132992 0.12314225 0.15908433  
1 2149 "tags=26%, list=15%, signal=31%"  
GSE41867\_DAY6\_VS\_DAY8\_LCMV\_CLONE13\_EFFECTOR\_CD8\_TCELL\_UP  
GSE41867\_DAY6\_VS\_DAY8\_LCMV\_CLONE13\_EFFECTOR\_CD8\_TCELL\_UP  
140 0.29553083 1.21303 0.10714286 0.15935506  
1 2604 "tags=29%, list=18%, signal=35%"  
GSE14308\_TH2\_VS\_NATURAL\_TREG\_UP GSE14308\_TH2\_VS\_NATURAL\_TREG\_UP  
141 0.29337722 1.2118562 0.10714286  
0.160818 1 930 "tags=14%, list=7%, signal=15%"  
GSE40274\_GATA1\_VS\_FOXP3\_AND\_GATA1\_TRANSDUCE\_ACTIVATED\_CD4\_TCELL\_DN  
GSE40274\_GATA1\_VS\_FOXP3\_AND\_GATA1\_TRANSDUCE\_ACTIVATED\_CD4\_TCELL\_DN  
150 0.2892357 1.210899 0.0985325  
0.16197334 1 1023 "tags=17%, list=7%, signal=18%"  
GSE3982\_EOSINOPHIL\_VS\_CENT\_MEMORY\_CD4\_TCELL\_UP  
GSE3982\_EOSINOPHIL\_VS\_CENT\_MEMORY\_CD4\_TCELL\_UP 147  
0.28865048 1.2108743 0.10337972 0.16192107

1 2159 "tags=28%, list=15%, signal=33%"  
GSE15330\_LYMPHOID\_MULTIPOTENT\_VS\_GRANULOCYTE\_MONOCYTE\_PROGENITOR\_IKA  
ROS\_KO\_UP  
GSE15330\_LYMPHOID\_MULTIPOTENT\_VS\_GRANULOCYTE\_MONOCYTE\_PROGENITOR\_IKA  
ROS\_KO\_UP 147 0.29254618 1.2103139  
0.11594203 0.16258766 1 2150 "tags=26%,  
list=15%, signal=30%"  
GSE1112\_OT1\_CD8AB\_VS\_HY\_CD8AA\_THYMOCYTE\_RT0C\_CULTURE\_DN  
GSE1112\_OT1\_CD8AB\_VS\_HY\_CD8AA\_THYMOCYTE\_RT0C\_CULTURE\_DN  
123 0.30322242 1.2096882 0.12970711  
0.16332346 1 2012 "tags=24%, list=14%, signal=27%"  
GSE17721\_PAM3CSK4\_VS\_GADIQUIMOD\_24H\_BMDC\_UP  
GSE17721\_PAM3CSK4\_VS\_GADIQUIMOD\_24H\_BMDC\_UP 149  
0.291316 1.2096353 0.1002045 0.16330819 1  
2445 "tags=28%, list=17%, signal=33%"  
GSE15324\_NAIVE\_VS\_ACTIVATED\_ELF4\_KO\_CD8\_TCELL\_DN  
GSE15324\_NAIVE\_VS\_ACTIVATED\_ELF4\_KO\_CD8\_TCELL\_DN 148  
0.2900031 1.2083282 0.105932206 0.16493313  
1 2391 "tags=29%, list=17%, signal=35%"  
GSE19198\_CTRL\_VS\_IL21\_TREATED\_TCELL\_24H\_DN  
GSE19198\_CTRL\_VS\_IL21\_TREATED\_TCELL\_24H\_DN 150  
0.2895483 1.2081496 0.108932465 0.16509756  
1 2361 "tags=29%, list=17%, signal=34%"  
GSE5503\_PLN\_DC\_VS\_SPLEEN\_DC\_ACTIVATED\_ALLOGENIC\_TCELL\_UP  
GSE5503\_PLN\_DC\_VS\_SPLEEN\_DC\_ACTIVATED\_ALLOGENIC\_TCELL\_UP  
145 0.2961895 1.2081221 0.09475806  
0.16503738 1 2210 "tags=21%, list=16%, signal=25%"  
GSE23502\_BM\_VS\_COLON\_TUMOR\_MYELOID\_DERIVED\_SUPPRESSOR\_CELL\_DN  
GSE23502\_BM\_VS\_COLON\_TUMOR\_MYELOID\_DERIVED\_SUPPRESSOR\_CELL\_DN  
138 0.29376963 1.2073607 0.11111111  
0.16595988 1 1079 "tags=17%, list=8%, signal=19%"  
GSE7764\_NKCELL\_VS\_SPLENOCYTE\_DN GSE7764\_NKCELL\_VS\_SPLENOCYTE\_DN  
143 0.29621053 1.2073122 0.12548262  
0.16593891 1 1495 "tags=22%, list=11%, signal=24%"  
GSE14000\_4H\_VS\_16H\_LPS\_DC\_UP GSE14000\_4H\_VS\_16H\_LPS\_DC\_UP  
139 0.2930359 1.2071342 0.08668076  
0.16605733 1 2617 "tags=37%, list=19%, signal=45%"  
GSE5679\_CTRL\_VS\_PPARG\_LIGAND\_ROSIGLITAZONE\_AND\_RARA\_AGONIST\_AM580\_TR  
EATED\_DC\_DN  
GSE5679\_CTRL\_VS\_PPARG\_LIGAND\_ROSIGLITAZONE\_AND\_RARA\_AGONIST\_AM580\_TR  
EATED\_DC\_DN 164 0.28649306 1.2068522  
0.11045365 0.16633601 1 2040 "tags=25%,  
list=14%, signal=29%"  
GSE37301\_HEMATOPOIETIC\_STEM\_CELL\_VS\_RAG2\_KO\_NK\_CELL\_DN  
GSE37301\_HEMATOPOIETIC\_STEM\_CELL\_VS\_RAG2\_KO\_NK\_CELL\_DN  
152 0.28904226 1.2067515 0.10638298  
0.16638386 1 1621 "tags=24%, list=11%, signal=26%"  
GSE17721\_0.5H\_VS\_8H\_CPG\_BMDC\_DN GSE17721\_0.5H\_VS\_8H\_CPG\_BMDC\_DN  
159 0.28898275 1.2061057 0.09756097  
0.16714373 1 3106 "tags=35%, list=22%, signal=45%"  
GSE17721\_POLYIC\_VS\_PAM3CSK4\_16H\_BMDC\_UP  
GSE17721\_POLYIC\_VS\_PAM3CSK4\_16H\_BMDC\_UP 153  
0.2932661 1.206048 0.10337972 0.16712958 1  
1667 "tags=18%, list=12%, signal=21%"



GSE8835\_HEALTHY\_VS\_CLL\_CD4\_TCELL\_DN  
GSE8835\_HEALTHY\_VS\_CLL\_CD4\_TCELL\_DN 135  
0.29110885 1.2054197 0.11570248 0.1678929  
1 1890 "tags=19%, list=13%, signal=22%"  
GSE29949\_CD8\_POS\_DC\_SPLEEN\_VS\_DC\_BRAIN\_UP  
GSE29949\_CD8\_POS\_DC\_SPLEEN\_VS\_DC\_BRAIN\_UP 147  
0.29010814 1.2053281 0.11704312 0.16793215  
1 1940 "tags=23%, list=14%, signal=27%"  
GSE21927\_UNTREATED\_VS\_GMCSF\_GCSF\_TREATED\_BONE\_MARROW\_UP  
GSE21927\_UNTREATED\_VS\_GMCSF\_GCSF\_TREATED\_BONE\_MARROW\_UP  
117 0.30106294 1.2052329 0.12298387  
0.16797352 1 1886 "tags=22%, list=13%, signal=25%"  
GSE37416\_12H\_VS\_48H\_F\_TULARENSIS\_LVS\_NEUTROPHIL\_UP  
GSE37416\_12H\_VS\_48H\_F\_TULARENSIS\_LVS\_NEUTROPHIL\_UP 143  
0.2951854 1.2048081 0.124223605 0.16845182  
1 1891 "tags=26%, list=13%, signal=30%"  
GSE27786\_LSK\_VS\_NEUTROPHIL\_UP GSE27786\_LSK\_VS\_NEUTROPHIL\_UP  
137 0.29256898 1.2046636 0.13069306  
0.16855639 1 1819 "tags=23%, list=13%, signal=27%"  
GSE14000\_TRANSLATED\_RNA\_VS\_MRNA\_4H\_LPS\_DC\_DN  
GSE14000\_TRANSLATED\_RNA\_VS\_MRNA\_4H\_LPS\_DC\_DN 108  
0.29813737 1.2037109 0.14928426 0.16979334  
1 2127 "tags=27%, list=15%, signal=31%"  
GSE12392\_WT\_VS\_IFNAR\_KO\_CD8A\_NEG\_SPLEEN\_DC\_DN  
GSE12392\_WT\_VS\_IFNAR\_KO\_CD8A\_NEG\_SPLEEN\_DC\_DN 123  
0.29426634 1.2028552 0.11632653 0.17087911  
1 1886 "tags=26%, list=13%, signal=30%"  
GSE7460\_CD8\_TCELL\_VS\_CD4\_TCELL\_ACT\_UP  
GSE7460\_CD8\_TCELL\_VS\_CD4\_TCELL\_ACT\_UP 139  
0.29675198 1.202852 0.10683761 0.17079459 1  
1535 "tags=23%, list=11%, signal=26%"  
GSE36078\_WT\_VS\_IL1R\_KO\_LUNG\_DC\_UP GSE36078\_WT\_VS\_IL1R\_KO\_LUNG\_DC\_UP  
150 0.29306504 1.2022178 0.11064718  
0.17159128 1 2332 "tags=21%, list=17%, signal=25%"  
GSE1448\_ANTI\_VALPHA2\_VS\_VBETA5\_DP\_THYMOCYTE\_UP  
GSE1448\_ANTI\_VALPHA2\_VS\_VBETA5\_DP\_THYMOCYTE\_UP 156  
0.29011714 1.2017958 0.114224136 0.17208195  
1 2631 "tags=29%, list=19%, signal=35%"  
GSE29618\_LAIV\_VS\_TIV\_FLU\_VACCINE\_DAY7\_PDC\_DN  
GSE29618\_LAIV\_VS\_TIV\_FLU\_VACCINE\_DAY7\_PDC\_DN 139  
0.294018 1.2017039 0.13235295 0.17211138 1  
2313 "tags=25%, list=16%, signal=30%"  
GSE33513\_TCF7\_KO\_VS\_HET\_EARLY\_THYMIC\_PROGENITOR\_DN  
GSE33513\_TCF7\_KO\_VS\_HET\_EARLY\_THYMIC\_PROGENITOR\_DN 153  
0.29186457 1.2010242 0.13987474 0.17299321  
1 1633 "tags=22%, list=12%, signal=25%"  
GSE17721\_POLYIC\_VS\_CPG\_4H\_BMDC\_UP GSE17721\_POLYIC\_VS\_CPG\_4H\_BMDC\_UP  
145 0.29185537 1.2007875 0.11359026  
0.17321287 1 2421 "tags=30%, list=17%, signal=35%"  
GSE28737\_BCL6\_HET\_VS\_BCL6\_KO\_MARGINAL\_ZONE\_BCELL\_DN  
GSE28737\_BCL6\_HET\_VS\_BCL6\_KO\_MARGINAL\_ZONE\_BCELL\_DN  
151 0.28771374 1.2007866 0.088421054  
0.17312236 1 2258 "tags=25%, list=16%, signal=30%"  
GSE39382\_IL3\_VS\_IL3\_IL33\_TREATED\_MAST\_CELL\_DN

|                                                                 |                                  |                                  |                                  |     |
|-----------------------------------------------------------------|----------------------------------|----------------------------------|----------------------------------|-----|
| GSE39382_IL3_VS_IL3_IL33_TREATED_MAST_CELL_DN                   |                                  |                                  |                                  | 142 |
| 0.29186565                                                      | 1.2003165                        | 0.13646056                       | 0.17365637                       |     |
| 1                                                               | 2350                             | "tags=30%, list=17%, signal=36%" |                                  |     |
| GSE36888_UNTREATED_VS_IL2_TREATED_TCELL_6H_DN                   |                                  |                                  |                                  | 135 |
| GSE36888_UNTREATED_VS_IL2_TREATED_TCELL_6H_DN                   |                                  |                                  |                                  | 135 |
| 0.29207516                                                      | 1.2000113                        | 0.13305613                       | 0.17397912                       |     |
| 1                                                               | 2391                             | "tags=30%, list=17%, signal=35%" |                                  |     |
| GSE17721_LPS_VS_POLYIC_12H_BMDC_DN                              |                                  |                                  |                                  | 150 |
| GSE17721_LPS_VS_POLYIC_12H_BMDC_DN                              |                                  |                                  |                                  | 150 |
| 0.29129615                                                      | 1.199736                         | 0.109615386                      | 0.17426214                       | 1   |
| 2259                                                            | "tags=26%, list=16%, signal=31%" |                                  |                                  |     |
| GSE17721_0.5H_VS_24H_GARDIQUIMOD_BMDC_DN                        |                                  |                                  |                                  | 144 |
| GSE17721_0.5H_VS_24H_GARDIQUIMOD_BMDC_DN                        |                                  |                                  |                                  | 144 |
| 0.28873265                                                      | 1.1994811                        | 0.122171946                      | 0.17450492                       |     |
| 1                                                               | 2365                             | "tags=27%, list=17%, signal=32%" |                                  |     |
| GSE16385_MONOCYTE_VS_12H_IL4_TREATED_MACROPHAGE_UP              |                                  |                                  |                                  | 121 |
| GSE16385_MONOCYTE_VS_12H_IL4_TREATED_MACROPHAGE_UP              |                                  |                                  |                                  | 121 |
| 0.30046156                                                      | 1.1993035                        | 0.11504425                       | 0.1746446                        |     |
| 1                                                               | 1837                             | "tags=22%, list=13%, signal=25%" |                                  |     |
| GSE36888_UNTREATED_VS_IL2_TREATED_TCELL_2H_UP                   |                                  |                                  |                                  | 138 |
| GSE36888_UNTREATED_VS_IL2_TREATED_TCELL_2H_UP                   |                                  |                                  |                                  | 138 |
| 0.2874899                                                       | 1.1990483                        | 0.112840466                      | 0.1749046                        |     |
| 1                                                               | 2404                             | "tags=29%, list=17%, signal=35%" |                                  |     |
| GSE21033_1H_VS_12H_POLYIC_STIM_DC_UP                            |                                  |                                  |                                  | 147 |
| GSE21033_1H_VS_12H_POLYIC_STIM_DC_UP                            |                                  |                                  |                                  | 147 |
| 0.2912755                                                       | 1.1987246                        | 0.115226336                      | 0.17527752                       |     |
| 1                                                               | 1311                             | "tags=15%, list=9%, signal=16%"  |                                  |     |
| GSE1925_3H_VS_24H_IFNG_STIM_MACROPHAGE_UP                       |                                  |                                  |                                  | 120 |
| GSE1925_3H_VS_24H_IFNG_STIM_MACROPHAGE_UP                       |                                  |                                  |                                  | 120 |
| 0.29913652                                                      | 1.1984223                        | 0.11904762                       | 0.17559393                       |     |
| 1                                                               | 1980                             | "tags=24%, list=14%, signal=28%" |                                  |     |
| GSE41867_NAIVE_VS_DAY8_LCMV_CLONE13_EFFECTOR_CD8_TCELL_DN       |                                  |                                  |                                  | 115 |
| GSE41867_NAIVE_VS_DAY8_LCMV_CLONE13_EFFECTOR_CD8_TCELL_DN       |                                  |                                  |                                  | 115 |
| 0.30062273                                                      | 1.1980671                        | 0.14957266                       |                                  |     |
| 0.17599799                                                      | 1                                | 2452                             | "tags=27%, list=17%, signal=32%" |     |
| GSE2585_AIRE_KO_VS_WT_CD80_HIGH_MTEC_DN                         |                                  |                                  |                                  | 146 |
| GSE2585_AIRE_KO_VS_WT_CD80_HIGH_MTEC_DN                         |                                  |                                  |                                  | 146 |
| 0.28931293                                                      | 1.197672                         | 0.13537118                       | 0.17648767                       | 1   |
| 2449                                                            | "tags=27%, list=17%, signal=32%" |                                  |                                  |     |
| GSE36392_MAC_VS_NEUTROPHIL_IL25_TREATED_LUNG_DN                 |                                  |                                  |                                  | 146 |
| GSE36392_MAC_VS_NEUTROPHIL_IL25_TREATED_LUNG_DN                 |                                  |                                  |                                  | 146 |
| 0.29174832                                                      | 1.1972426                        | 0.09656652                       | 0.1769687                        |     |
| 1                                                               | 1967                             | "tags=17%, list=14%, signal=20%" |                                  |     |
| GSE46606_DAY1_VS_DAY3_CD40L_IL2_IL5_STIMULATED_IRF4MID_BCELL_DN |                                  |                                  |                                  | 150 |
| GSE46606_DAY1_VS_DAY3_CD40L_IL2_IL5_STIMULATED_IRF4MID_BCELL_DN |                                  |                                  |                                  | 150 |
| 0.28821406                                                      | 1.1967771                        | 0.12334802                       |                                  |     |
| 0.17753047                                                      | 1                                | 2092                             | "tags=29%, list=15%, signal=33%" |     |
| GSE22886_NAIVE_BCELL_VS_NEUTROPHIL_DN                           |                                  |                                  |                                  | 142 |
| GSE22886_NAIVE_BCELL_VS_NEUTROPHIL_DN                           |                                  |                                  |                                  | 142 |
| 0.29180616                                                      | 1.1963446                        | 0.13292433                       | 0.1780534                        |     |
| 1                                                               | 1991                             | "tags=26%, list=14%, signal=30%" |                                  |     |
| GSE27786_NKCELL_VS_NEUTROPHIL_UP                                |                                  |                                  |                                  | 148 |
| GSE27786_NKCELL_VS_NEUTROPHIL_UP                                |                                  |                                  |                                  | 148 |
| 0.28846425                                                      | 1.1961936                        | 0.125                            |                                  |     |
| 0.17816709                                                      | 1                                | 2614                             | "tags=33%, list=19%, signal=40%" |     |

GSE40666\_UNTREATED\_VS\_IFNA\_STIM\_CD8\_TCELL\_90MIN\_DN  
GSE40666\_UNTREATED\_VS\_IFNA\_STIM\_CD8\_TCELL\_90MIN\_DN 142  
0.2917452 1.1961825 0.13107823 0.17808764  
1 2720 "tags=37%, list=19%, signal=46%"  
GSE22611\_UNSTIM\_VS\_6H\_MDP\_STIM\_NOD2\_TRANSDUCECD\_HEK293T\_CELL\_UP  
GSE22611\_UNSTIM\_VS\_6H\_MDP\_STIM\_NOD2\_TRANSDUCECD\_HEK293T\_CELL\_UP  
139 0.29287133 1.1960921 0.14285715  
0.1781224 1 1997 "tags=21%, list=14%, signal=24%"  
GSE41867\_DAY6\_EFFECTOR\_VS\_DAY30\_EXHAUSTED\_CD8\_TCELL\_LCMV\_CLONE13\_UP  
GSE41867\_DAY6\_EFFECTOR\_VS\_DAY30\_EXHAUSTED\_CD8\_TCELL\_LCMV\_CLONE13\_UP  
133 0.2960548 1.1957113 0.12526096  
0.17855144 1 1134 "tags=20%, list=8%, signal=22%"  
GSE17721\_4\_VS\_24H\_CPG\_BMDC\_UP GSE17721\_4\_VS\_24H\_CPG\_BMDC\_UP  
156 0.28914902 1.195463 0.12738854  
0.17879154 1 1181 "tags=12%, list=8%, signal=13%"  
GSE360\_DC\_VS\_MAC\_L\_DONOVANI\_UP GSE360\_DC\_VS\_MAC\_L\_DONOVANI\_UP  
154 0.28722614 1.1951356 0.102783725  
0.17915611 1 2519 "tags=29%, list=18%, signal=35%"  
GSE17721\_LPS\_VS\_GARDIQUIMOD\_16H\_BMDC\_UP  
GSE17721\_LPS\_VS\_GARDIQUIMOD\_16H\_BMDC\_UP 155  
0.28812462 1.1945224 0.135255 0.17994794 1  
2378 "tags=26%, list=17%, signal=31%"  
GSE5542\_UNTREATED\_VS\_IFNA\_TREATED\_EPITHELIAL\_CELLS\_24H\_UP  
GSE5542\_UNTREATED\_VS\_IFNA\_TREATED\_EPITHELIAL\_CELLS\_24H\_UP  
151 0.28944358 1.1941974 0.12711865  
0.18030725 1 2442 "tags=32%, list=17%, signal=38%"  
GSE16451\_CTRL\_VS\_WEST\_EQUINE\_ENC\_VIRUS\_MATURE\_NEURON\_CELL\_LINE\_UP  
GSE16451\_CTRL\_VS\_WEST\_EQUINE\_ENC\_VIRUS\_MATURE\_NEURON\_CELL\_LINE\_UP  
145 0.28854644 1.1940202 0.14198783  
0.18045995 1 2462 "tags=31%, list=17%, signal=37%"  
GSE11864\_CSF1\_VS\_CSF1\_PAM3CYS\_IN\_MAC\_DN  
GSE11864\_CSF1\_VS\_CSF1\_PAM3CYS\_IN\_MAC\_DN 126  
0.29559183 1.1939329 0.12631579 0.18047167  
1 2524 "tags=35%, list=18%, signal=42%"  
GSE43955\_TH0\_VS\_TGFB\_IL6\_TH17\_ACT\_CD4\_TCELL\_1H\_UP  
GSE43955\_TH0\_VS\_TGFB\_IL6\_TH17\_ACT\_CD4\_TCELL\_1H\_UP 159  
0.29266363 1.1937642 0.12916666 0.1806228  
1 2354 "tags=30%, list=17%, signal=35%"  
GSE17721\_POLYIC\_VS\_CPG\_2H\_BMDC\_UP GSE17721\_POLYIC\_VS\_CPG\_2H\_BMDC\_UP  
148 0.28558958 1.1936814 0.1199187  
0.1806462 1 1919 "tags=20%, list=14%, signal=23%"  
GSE12366\_PLASMA\_CELL\_VS\_NAIVE\_BCELL\_UP  
GSE12366\_PLASMA\_CELL\_VS\_NAIVE\_BCELL\_UP 124  
0.29676518 1.1934061 0.15982722 0.18094824  
1 2392 "tags=25%, list=17%, signal=30%"  
GSE17721\_CTRL\_VS\_GARDIQUIMOD\_6H\_BMDC\_DN  
GSE17721\_CTRL\_VS\_GARDIQUIMOD\_6H\_BMDC\_DN 151  
0.28696927 1.1928068 0.13916501 0.18170665  
1 2174 "tags=26%, list=15%, signal=30%"  
GSE37533\_PPARG1\_FOXP3\_VS\_FOXP3\_TRANSDUCECD\_CD4\_TCELL\_UP  
GSE37533\_PPARG1\_FOXP3\_VS\_FOXP3\_TRANSDUCECD\_CD4\_TCELL\_UP  
145 0.29033068 1.1926177 0.11691023  
0.18186273 1 2271 "tags=26%, list=16%, signal=31%"  
GSE3400\_UNTREATED\_VS\_IFNB\_TREATED\_MEF\_DN

|                                                                    |                                  |                                  |                                  |             |
|--------------------------------------------------------------------|----------------------------------|----------------------------------|----------------------------------|-------------|
| GSE3400_UNTREATED_VS_IFNB_TREATED_MEF_DN                           |                                  |                                  |                                  | 84          |
| 0.31533208                                                         | 1.1925919                        | 0.15301724                       |                                  | 0.18180451  |
| 1                                                                  | 1737                             | "tags=23%, list=12%, signal=26%" |                                  |             |
| GSE5099_UNSTIM_VS_MCSF_TREATED_MONOCYTE_DAY7_UP                    |                                  |                                  |                                  |             |
| GSE5099_UNSTIM_VS_MCSF_TREATED_MONOCYTE_DAY7_UP                    |                                  |                                  |                                  | 120         |
| 0.29603198                                                         | 1.192295                         | 0.13900416                       | 0.18211035                       | 1           |
| 2421                                                               | "tags=32%, list=17%, signal=38%" |                                  |                                  |             |
| GSE25088_CTRL_VS_IL4_AND_ROSIGLITAZONE_STIM_STAT6_KO_MACROPHAGE_UP |                                  |                                  |                                  |             |
| GSE25088_CTRL_VS_IL4_AND_ROSIGLITAZONE_STIM_STAT6_KO_MACROPHAGE_UP |                                  |                                  |                                  |             |
|                                                                    | 135                              | 0.29048976                       | 1.1909609                        | 0.121212125 |
| 0.18391088                                                         | 1                                | 2400                             | "tags=27%, list=17%, signal=32%" |             |
| GSE42021_CD24HI_VS_CD24INT_TCONV_THYMUS_UP                         |                                  |                                  |                                  |             |
| GSE42021_CD24HI_VS_CD24INT_TCONV_THYMUS_UP                         |                                  |                                  |                                  | 153         |
| 0.28787187                                                         | 1.1906987                        | 0.14468086                       |                                  | 0.18419239  |
| 1                                                                  | 2251                             | "tags=28%, list=16%, signal=33%" |                                  |             |
| GSE29949_DC_BRAIN_VS_MONOCYTE_BONE_MARROW_UP                       |                                  |                                  |                                  |             |
| GSE29949_DC_BRAIN_VS_MONOCYTE_BONE_MARROW_UP                       |                                  |                                  |                                  | 151         |
| 0.2843581                                                          | 1.1903993                        | 0.1187905                        |                                  | 0.18453582  |
| 1                                                                  | 1964                             | "tags=28%, list=14%, signal=33%" |                                  |             |
| GSE20484_MCSG_VS_CXCL4_MONOCYTE_DERIVED_MACROPHAGE_UP              |                                  |                                  |                                  |             |
| GSE20484_MCSG_VS_CXCL4_MONOCYTE_DERIVED_MACROPHAGE_UP              |                                  |                                  |                                  |             |
| 135                                                                | 0.29277587                       | 1.1899022                        | 0.152809                         | 0.18515094  |
| 1                                                                  | 2064                             | "tags=24%, list=15%, signal=27%" |                                  |             |
| GSE3982_EOSINOPHIL_VS_EFF_MEMORY_CD4_TCELL_UP                      |                                  |                                  |                                  |             |
| GSE3982_EOSINOPHIL_VS_EFF_MEMORY_CD4_TCELL_UP                      |                                  |                                  |                                  | 144         |
| 0.2903756                                                          | 1.1897984                        | 0.13968958                       |                                  | 0.18520173  |
| 1                                                                  | 2595                             | "tags=33%, list=18%, signal=40%" |                                  |             |
| GSE29949_CD8_NEG_DC_SPLEEN_VS_MONOCYTE_BONE_MARROW_UP              |                                  |                                  |                                  |             |
| GSE29949_CD8_NEG_DC_SPLEEN_VS_MONOCYTE_BONE_MARROW_UP              |                                  |                                  |                                  |             |
| 138                                                                | 0.28866944                       | 1.1896132                        | 0.11344538                       |             |
| 0.18536593                                                         | 1                                | 1967                             | "tags=26%, list=14%, signal=30%" |             |
| GSE5589_LPS_VS_LPS_AND_IL10_STIM_MACROPHAGE_180MIN_UP              |                                  |                                  |                                  |             |
| GSE5589_LPS_VS_LPS_AND_IL10_STIM_MACROPHAGE_180MIN_UP              |                                  |                                  |                                  |             |
| 141                                                                | 0.29151478                       | 1.189561                         | 0.14285715                       | 0.18533358  |
| 1                                                                  | 2311                             | "tags=30%, list=16%, signal=36%" |                                  |             |
| GSE25846_IL10_POS_VS_NEG_CD8_TCELL_DAY7_POST_CORONAVIRUS_BRAIN_DN  |                                  |                                  |                                  |             |
| GSE25846_IL10_POS_VS_NEG_CD8_TCELL_DAY7_POST_CORONAVIRUS_BRAIN_DN  |                                  |                                  |                                  |             |
|                                                                    | 144                              | 0.29033118                       | 1.1894363                        | 0.11683168  |
| 0.18542704                                                         | 1                                | 2812                             | "tags=33%, list=20%, signal=41%" |             |
| GSE10856_CTRL_VS_TNFRSF6B_IN_MACROPHAGE_UP                         |                                  |                                  |                                  |             |
| GSE10856_CTRL_VS_TNFRSF6B_IN_MACROPHAGE_UP                         |                                  |                                  |                                  | 118         |
| 0.29599243                                                         | 1.1893718                        | 0.16780046                       |                                  | 0.18541424  |
| 1                                                                  | 1847                             | "tags=21%, list=13%, signal=24%" |                                  |             |
| GSE5542_UNTREATED_VS_IFNA_AND_IFNG_TREATED_EPITHELIAL_CELLS_6H_DN  |                                  |                                  |                                  |             |
| GSE5542_UNTREATED_VS_IFNA_AND_IFNG_TREATED_EPITHELIAL_CELLS_6H_DN  |                                  |                                  |                                  |             |
|                                                                    | 141                              | 0.28884253                       | 1.1892958                        | 0.119284295 |
| 0.18542093                                                         | 1                                | 2374                             | "tags=27%, list=17%, signal=32%" |             |
| GSE21360_PRIMARY_VS_QUATERNARY_MEMORY_CD8_TCELL_UP                 |                                  |                                  |                                  |             |
| GSE21360_PRIMARY_VS_QUATERNARY_MEMORY_CD8_TCELL_UP                 |                                  |                                  |                                  | 144         |
| 0.2865302                                                          | 1.1888729                        | 0.12793177                       |                                  | 0.18592411  |
| 1                                                                  | 2257                             | "tags=31%, list=16%, signal=37%" |                                  |             |
| GSE26559_TCF1_KO_VS_WT_LIN_NEG_CELL_UP                             |                                  |                                  |                                  |             |
| GSE26559_TCF1_KO_VS_WT_LIN_NEG_CELL_UP                             |                                  |                                  |                                  | 144         |
| 0.28824338                                                         | 1.1882749                        | 0.11111111                       |                                  | 0.18672532  |

|                                                                           |                                  |                                  |                                  |                                  |
|---------------------------------------------------------------------------|----------------------------------|----------------------------------|----------------------------------|----------------------------------|
| 1                                                                         | 2176                             | "tags=28%, list=15%, signal=33%" |                                  |                                  |
| GSE2770_IL4_ACT_VS_ACT_CD4_TCELL_48H_UP                                   |                                  |                                  |                                  |                                  |
| GSE2770_IL4_ACT_VS_ACT_CD4_TCELL_48H_UP                                   |                                  |                                  |                                  |                                  |
| 0.29159224                                                                | 1.1879573                        | 0.1440678                        | 135                              | 0.18708095                       |
| 1                                                                         | 2113                             | "tags=22%, list=15%, signal=26%" |                                  |                                  |
| GSE29618_BCELL_VS_MONOCYTE_DAY7_FLU_VACCINE_DN                            |                                  |                                  |                                  |                                  |
| GSE29618_BCELL_VS_MONOCYTE_DAY7_FLU_VACCINE_DN                            |                                  |                                  |                                  |                                  |
| 0.28238747                                                                | 1.1876274                        | 0.1130064                        | 153                              | 0.1874544                        |
| 1                                                                         | 2045                             | "tags=27%, list=14%, signal=32%" |                                  |                                  |
| GSE14000_TRANSLATED_RNA_VS_MRNA_DC_DN                                     |                                  |                                  |                                  |                                  |
| GSE14000_TRANSLATED_RNA_VS_MRNA_DC_DN                                     |                                  |                                  |                                  |                                  |
| 0.30378324                                                                | 1.1874424                        | 0.13716814                       | 97                               | 0.18763989                       |
| 1                                                                         | 1916                             | "tags=24%, list=14%, signal=27%" |                                  |                                  |
| GSE27786_LSK_VS_ERYTHROBLAST_UP                                           |                                  |                                  |                                  |                                  |
| GSE27786_LSK_VS_ERYTHROBLAST_UP                                           |                                  |                                  |                                  |                                  |
| 145                                                                       | 0.2830825                        | 1.1873937                        | 0.13865547                       |                                  |
| 0.18762298                                                                | 1                                | 2278                             | "tags=26%, list=16%, signal=31%" |                                  |
| GSE17721_0.5H_VS_24H_LPS_BMDC_UP                                          |                                  |                                  |                                  |                                  |
| GSE17721_0.5H_VS_24H_LPS_BMDC_UP                                          |                                  |                                  |                                  |                                  |
| 155                                                                       | 0.2872327                        | 1.186652                         | 0.113168724                      |                                  |
| 0.18859395                                                                | 1                                | 1957                             | "tags=23%, list=14%, signal=26%" |                                  |
| GSE2770_IL12_ACT_VS_ACT_CD4_TCELL_2H_DN                                   |                                  |                                  |                                  |                                  |
| GSE2770_IL12_ACT_VS_ACT_CD4_TCELL_2H_DN                                   |                                  |                                  |                                  |                                  |
| 0.28823557                                                                | 1.1862788                        | 0.14587738                       | 142                              | 0.18904783                       |
| 1                                                                         | 1805                             | "tags=25%, list=13%, signal=28%" |                                  |                                  |
| GSE7568_CTRL_VS_3H_TGFB_TREATED_MACROPHAGES_WITH_IL4_AND_DEXAMETHASONE_UP |                                  |                                  |                                  |                                  |
| GSE7568_CTRL_VS_3H_TGFB_TREATED_MACROPHAGES_WITH_IL4_AND_DEXAMETHASONE_UP |                                  |                                  |                                  |                                  |
| 122                                                                       | 0.29437593                       | 1.1861881                        |                                  |                                  |
| 0.15401301                                                                | 0.1890758                        | 1                                | 1761                             | "tags=11%, list=12%, signal=13%" |
| GSE37416_0H_VS_24H_F_TULARENSIS_LVS_NEUTROPHIL_DN                         |                                  |                                  |                                  |                                  |
| GSE37416_0H_VS_24H_F_TULARENSIS_LVS_NEUTROPHIL_DN                         |                                  |                                  |                                  |                                  |
| 0.2830287                                                                 | 1.1846905                        | 0.11134454                       | 145                              | 0.19111508                       |
| 1                                                                         | 2449                             | "tags=32%, list=17%, signal=38%" |                                  |                                  |
| GSE43863_DAY6_EFF_VS_DAY150_MEM_TFH_CD4_TCELL_UP                          |                                  |                                  |                                  |                                  |
| GSE43863_DAY6_EFF_VS_DAY150_MEM_TFH_CD4_TCELL_UP                          |                                  |                                  |                                  |                                  |
| 0.28246275                                                                | 1.1840954                        | 0.12295082                       | 152                              | 0.19191597                       |
| 1                                                                         | 1790                             | "tags=22%, list=13%, signal=25%" |                                  |                                  |
| GSE37301 GRANULOCYTE MONOCYTE PROGENITOR_VS_RAG2_KO_NK_CELL_DN            |                                  |                                  |                                  |                                  |
| GSE37301 GRANULOCYTE MONOCYTE PROGENITOR_VS_RAG2_KO_NK_CELL_DN            |                                  |                                  |                                  |                                  |
| 155                                                                       | 0.28468022                       | 1.1829162                        | 0.13913043                       |                                  |
| 0.19352074                                                                | 1                                | 2904                             | "tags=32%, list=21%, signal=40%" |                                  |
| GSE38681_WT_VS_LYL1_KO_LYMPHOID_PRIMED_MULTIPOTENT_PROGENITOR_UP          |                                  |                                  |                                  |                                  |
| GSE38681_WT_VS_LYL1_KO_LYMPHOID_PRIMED_MULTIPOTENT_PROGENITOR_UP          |                                  |                                  |                                  |                                  |
| 149                                                                       | 0.2859558                        | 1.1823163                        | 0.13900416                       |                                  |
| 0.19430424                                                                | 1                                | 1974                             | "tags=25%, list=14%, signal=29%" |                                  |
| GSE360_L_MAJOR_VS_B_MALAYI_LOW_DOSE_DC_DN                                 |                                  |                                  |                                  |                                  |
| GSE360_L_MAJOR_VS_B_MALAYI_LOW_DOSE_DC_DN                                 |                                  |                                  |                                  |                                  |
| 0.28384194                                                                | 1.182285                         | 0.14806867                       | 154                              | 0.19424406                       |
| 2613                                                                      | "tags=29%, list=19%, signal=35%" |                                  |                                  |                                  |
| GSE24574_BCL6_HIGH_TFH_VS_NAIVE_CD4_TCELL_UP                              |                                  |                                  |                                  |                                  |
| GSE24574_BCL6_HIGH_TFH_VS_NAIVE_CD4_TCELL_UP                              |                                  |                                  |                                  |                                  |
| 0.28364918                                                                | 1.182063                         | 0.12836438                       | 149                              | 0.19447279                       |
| 1154                                                                      | "tags=13%, list=8%, signal=14%"  |                                  |                                  |                                  |
| GSE3994_WT_VS_PAC1_KO_ACTIVATED_MAST_CELL_DN                              |                                  |                                  |                                  |                                  |

|                                                                                                    |                                  |                                  |                                  |            |
|----------------------------------------------------------------------------------------------------|----------------------------------|----------------------------------|----------------------------------|------------|
| GSE3994_WT_VS_PAC1_KO_ACTIVATED_MAST_CELL_DN                                                       |                                  |                                  |                                  | 154        |
| 0.28235212                                                                                         | 1.1820619                        | 0.112426035                      | 0.19437337                       |            |
| 1                                                                                                  | 2414                             | "tags=27%, list=17%, signal=33%" |                                  |            |
| GSE17721_POLYIC_VS_GARDIQUIMOD_24H_BMDC_UP                                                         |                                  |                                  |                                  |            |
| GSE17721_POLYIC_VS_GARDIQUIMOD_24H_BMDC_UP                                                         |                                  |                                  |                                  | 153        |
| 0.2860737                                                                                          | 1.1816354                        | 0.13253012                       | 0.1948998                        |            |
| 1                                                                                                  | 1150                             | "tags=17%, list=8%, signal=18%"  |                                  |            |
| GSE37301_LYMPHOID_PRIMED_MPP_VS_CD4_TCELL_DN                                                       |                                  |                                  |                                  |            |
| GSE37301_LYMPHOID_PRIMED_MPP_VS_CD4_TCELL_DN                                                       |                                  |                                  |                                  | 146        |
| 0.28375655                                                                                         | 1.181338                         | 0.12997903                       | 0.19521782                       | 1          |
| 2831                                                                                               | "tags=36%, list=20%, signal=44%" |                                  |                                  |            |
| GSE22611_MUTANT_NOD2_VS_CTRL_TRANSDUCE                                                             |                                  |                                  |                                  |            |
| GSE22611_MUTANT_NOD2_VS_CTRL_TRANSDUCE                                                             |                                  |                                  |                                  |            |
| 137                                                                                                | 0.2888107                        | 1.1812428                        | 0.14782609                       |            |
| 0.19526652                                                                                         | 1                                | 1818                             | "tags=18%, list=13%, signal=20%" |            |
| GSE15330_HSC_VS_LYMPHOID_PRIMED_MULTIPOTENT_PROGENITOR_UP                                          |                                  |                                  |                                  |            |
| GSE15330_HSC_VS_LYMPHOID_PRIMED_MULTIPOTENT_PROGENITOR_UP                                          |                                  |                                  |                                  |            |
| 154                                                                                                | 0.28368744                       | 1.1811956                        | 0.12909836                       |            |
| 0.1952368                                                                                          | 1                                | 2046                             | "tags=25%, list=14%, signal=29%" |            |
| GSE11961_FOLLICULAR_BCELL_VS_GERMINAL_CENTER_BCELL_DAY7_DN                                         |                                  |                                  |                                  |            |
| GSE11961_FOLLICULAR_BCELL_VS_GERMINAL_CENTER_BCELL_DAY7_DN                                         |                                  |                                  |                                  |            |
| 152                                                                                                | 0.28579238                       | 1.181151                         | 0.13025211                       | 0.19520283 |
| 1                                                                                                  | 1795                             | "tags=18%, list=13%, signal=20%" |                                  |            |
| GSE19888_ADENOSINE_A3R_INH_PRETREAT_AND_ACT_BY_A3R_VS_A3R_INH_AND_TCELL_MEMBRANES_ACT_MAST_CELL_DN |                                  |                                  |                                  |            |
| GSE19888_ADENOSINE_A3R_INH_PRETREAT_AND_ACT_BY_A3R_VS_A3R_INH_AND_TCELL_MEMBRANES_ACT_MAST_CELL_DN |                                  |                                  |                                  |            |
| 1.1811403                                                                                          | 0.12997903                       | 0.19511895                       | 1                                | 0.2877685  |
| 2321                                                                                               | "tags=32%, list=16%, signal=38%" |                                  |                                  |            |
| GSE29949_CD8_POS_DC_SPLEEN_VS_MONOCYTE_BONE_MARROW_DN                                              |                                  |                                  |                                  |            |
| GSE29949_CD8_POS_DC_SPLEEN_VS_MONOCYTE_BONE_MARROW_DN                                              |                                  |                                  |                                  |            |
| 150                                                                                                | 0.2841825                        | 1.1809394                        | 0.13664596                       |            |
| 0.19530813                                                                                         | 1                                | 1809                             | "tags=20%, list=13%, signal=23%" |            |
| GSE32034_LY6C_HIGH_VS_LOW_ROSIGLIZATONE_TREATED_MONOCYTE_UP                                        |                                  |                                  |                                  |            |
| GSE32034_LY6C_HIGH_VS_LOW_ROSIGLIZATONE_TREATED_MONOCYTE_UP                                        |                                  |                                  |                                  |            |
| 156                                                                                                | 0.28123826                       | 1.1807876                        | 0.13432837                       |            |
| 0.1954518                                                                                          | 1                                | 2686                             | "tags=35%, list=19%, signal=43%" |            |
| GSE27786_CD8_TCELL_VS_MONO_MAC_UP                                                                  |                                  |                                  |                                  |            |
| GSE27786_CD8_TCELL_VS_MONO_MAC_UP                                                                  |                                  |                                  |                                  |            |
| 144                                                                                                | 0.28647044                       | 1.180353                         | 0.15184382                       |            |
| 0.19602071                                                                                         | 1                                | 2048                             | "tags=23%, list=15%, signal=27%" |            |
| GSE11961_FOLLICULAR_BCELL_VS_MEMORY_BCELL_DAY7_UP                                                  |                                  |                                  |                                  |            |
| GSE11961_FOLLICULAR_BCELL_VS_MEMORY_BCELL_DAY7_UP                                                  |                                  |                                  |                                  | 145        |
| 0.28517196                                                                                         | 1.1797075                        | 0.13478261                       | 0.19687666                       |            |
| 1                                                                                                  | 2072                             | "tags=28%, list=15%, signal=33%" |                                  |            |
| GSE21546_ELK1_KO_VS_SAP1A_KO_AND_ELK1_KO_ANTI_CD3_STIM_DP_THYMOCYTES_UP                            |                                  |                                  |                                  |            |
| GSE21546_ELK1_KO_VS_SAP1A_KO_AND_ELK1_KO_ANTI_CD3_STIM_DP_THYMOCYTES_UP                            |                                  |                                  |                                  |            |
| 0.14444445                                                                                         | 131                              | 0.29065132                       | 1.1794437                        |            |
| 0.19716801                                                                                         | 1                                | 2102                             | "tags=25%, list=15%, signal=29%" |            |
| GSE13484_12H_UNSTIM_VS_YF17D_VACCINE_STIM_PBMC_DN                                                  |                                  |                                  |                                  |            |
| GSE13484_12H_UNSTIM_VS_YF17D_VACCINE_STIM_PBMC_DN                                                  |                                  |                                  |                                  | 153        |
| 0.28475112                                                                                         | 1.1794313                        | 0.13453816                       | 0.19708355                       |            |
| 1                                                                                                  | 2239                             | "tags=23%, list=16%, signal=27%" |                                  |            |

GSE14000\_TRANSLATED\_RNA\_VS\_MRNA\_4H\_LPS\_DC\_UP  
GSE14000\_TRANSLATED\_RNA\_VS\_MRNA\_4H\_LPS\_DC\_UP 135  
0.28971735 1.179069 0.15714286 0.19753139 1  
3153 "tags=38%, list=22%, signal=48%"  
GSE7852\_TREG\_VS\_TCONV\_DN GSE7852\_TREG\_VS\_TCONV\_DN 151  
0.2827453 1.1788001 0.12681913 0.19783331  
1 2103 "tags=28%, list=15%, signal=33%"  
GSE26928\_NAIVE\_VS\_CXCR5\_POS\_CD4\_TCELL\_DN  
GSE26928\_NAIVE\_VS\_CXCR5\_POS\_CD4\_TCELL\_DN 137  
0.2866255 1.1785423 0.14604463 0.19811165  
1 1371 "tags=20%, list=10%, signal=22%"  
GSE15330\_WT\_VS\_IKAROS\_KO\_HSC\_UP GSE15330\_WT\_VS\_IKAROS\_KO\_HSC\_UP  
151 0.27996647 1.1783347 0.11776447  
0.19831944 1 1837 "tags=23%, list=13%, signal=26%"  
GSE3720\_UNSTIM\_VS\_PMA\_STIM\_VD1\_GAMMADELTA\_TCELL\_DN  
GSE3720\_UNSTIM\_VS\_PMA\_STIM\_VD1\_GAMMADELTA\_TCELL\_DN 99  
0.30233303 1.1781604 0.16263737 0.19847135  
1 1731 "tags=19%, list=12%, signal=22%"  
GSE4984\_GALECTIN1\_VS\_LPS\_STIM\_DC\_UP  
GSE4984\_GALECTIN1\_VS\_LPS\_STIM\_DC\_UP 120  
0.29432726 1.1780231 0.15845825 0.19858938  
1 2065 "tags=29%, list=15%, signal=34%"  
GSE15767\_MED\_VS\_SCS\_MAC\_LN\_DN GSE15767\_MED\_VS\_SCS\_MAC\_LN\_DN  
142 0.28824985 1.1777672 0.12474849  
0.19884668 1 1810 "tags=22%, list=13%, signal=25%"  
GSE17721\_LPS\_VS\_CPG\_0.5H\_BMDC\_UP GSE17721\_LPS\_VS\_CPG\_0.5H\_BMDC\_UP  
152 0.28608015 1.1777169 0.14529915  
0.19881538 1 2620 "tags=26%, list=19%, signal=31%"  
GSE17301\_CTRL\_VS\_48H\_ACD3\_ACD28\_STIM\_CD8\_TCELL\_UP  
GSE17301\_CTRL\_VS\_48H\_ACD3\_ACD28\_STIM\_CD8\_TCELL\_UP 149  
0.28326485 1.177661 0.12727273 0.19879313 1  
2030 "tags=23%, list=14%, signal=26%"  
GSE1460\_DP\_THYMOCYTE\_VS\_NAIVE\_CD4\_TCELL\_CORD\_BLOOD\_DN  
GSE1460\_DP\_THYMOCYTE\_VS\_NAIVE\_CD4\_TCELL\_CORD\_BLOOD\_DN  
136 0.2875689 1.1776323 0.14042553  
0.19873486 1 1450 "tags=15%, list=10%, signal=16%"  
GSE17721\_CTRL\_VS\_CPG\_8H\_BMDC\_UP GSE17721\_CTRL\_VS\_CPG\_8H\_BMDC\_UP  
137 0.28753456 1.1775233 0.14468086  
0.19878052 1 2314 "tags=27%, list=16%, signal=32%"  
GSE2128\_C57BL6\_VS\_NOD\_THYMOCYTE\_DN  
GSE2128\_C57BL6\_VS\_NOD\_THYMOCYTE\_DN 137  
0.28607562 1.1774182 0.14 0.19883385 1  
1977 "tags=22%, list=14%, signal=25%"  
GSE10240\_CTRL\_VS\_IL17\_STIM\_PRIMARY\_BRONCHIAL\_EPITHELIAL\_CELLS\_UP  
GSE10240\_CTRL\_VS\_IL17\_STIM\_PRIMARY\_BRONCHIAL\_EPITHELIAL\_CELLS\_UP  
147 0.28568605 1.177116 0.14102565  
0.19919203 1 1309 "tags=16%, list=9%, signal=17%"  
GSE37532\_WT\_VS\_PPARG\_KO\_VISCERAL\_ADIPOSE\_TISSUE\_TCONV\_DN  
GSE37532\_WT\_VS\_PPARG\_KO\_VISCERAL\_ADIPOSE\_TISSUE\_TCONV\_DN  
150 0.27865526 1.1769962 0.12276786  
0.19927542 1 1977 "tags=26%, list=14%, signal=30%"  
GSE17721\_CTRL\_VS\_CPG\_8H\_BMDC\_DN GSE17721\_CTRL\_VS\_CPG\_8H\_BMDC\_DN  
164 0.2772108 1.1769936 0.1380753  
0.19917728 1 2043 "tags=23%, list=14%, signal=27%"

GSE20715\_WT\_VS\_TLR4\_KO\_6H\_OZONE\_LUNG\_UP  
GSE20715\_WT\_VS\_TLR4\_KO\_6H\_OZONE\_LUNG\_UP 155  
0.28264648 1.1769568 0.12017167 0.19912145  
1 1707 "tags=19%, list=12%, signal=21%"  
GSE37301\_HEMATOPOIETIC\_STEM\_CELL\_VS\_GRAN\_MONO\_PROGENITOR\_DN  
GSE37301\_HEMATOPOIETIC\_STEM\_CELL\_VS\_GRAN\_MONO\_PROGENITOR\_DN  
138 0.2890754 1.1767937 0.1277533  
0.19926284 1 2225 "tags=28%, list=16%, signal=33%"  
GSE41867\_DAY15\_EFFECTOR\_VS\_DAY30\_EXHAUSTED\_CD8\_TCELL\_LCMV\_CLONE13\_UP  
  
GSE41867\_DAY15\_EFFECTOR\_VS\_DAY30\_EXHAUSTED\_CD8\_TCELL\_LCMV\_CLONE13\_UP  
146 0.28851795 1.1752038  
0.14618644 0.2015644 1 1983 "tags=27%,  
list=14%, signal=31%"  
GSE37301\_HEMATOPOIETIC\_STEM\_CELL\_VS\_LYMPHOID\_PRIMED\_MPP\_UP  
GSE37301\_HEMATOPOIETIC\_STEM\_CELL\_VS\_LYMPHOID\_PRIMED\_MPP\_UP  
130 0.2842069 1.1747282 0.15317287  
0.20218998 1 2062 "tags=25%, list=15%, signal=29%"  
GSE37301\_RAG2\_KO\_VS\_RAG2\_AND\_ETS1\_KO\_NK\_CELL\_UP  
GSE37301\_RAG2\_KO\_VS\_RAG2\_AND\_ETS1\_KO\_NK\_CELL\_UP 155  
0.28224495 1.1747016 0.14660831 0.20212688  
1 1912 "tags=23%, list=14%, signal=26%"  
GSE25890\_CTRL\_VS\_IL33\_IL7\_TREATED\_NUOCYTES\_DN  
GSE25890\_CTRL\_VS\_IL33\_IL7\_TREATED\_NUOCYTES\_DN 153  
0.28277165 1.1743379 0.13441955 0.2026131  
1 2001 "tags=26%, list=14%, signal=30%"  
GSE26343\_UNSTIM\_VS\_LPS\_STIM\_NFAT5\_KO\_MACROPHAGE\_UP  
GSE26343\_UNSTIM\_VS\_LPS\_STIM\_NFAT5\_KO\_MACROPHAGE\_UP 154  
0.2837499 1.1741091 0.14075631 0.20286357  
1 2149 "tags=30%, list=15%, signal=35%"  
GSE40274\_CTRL\_VS\_LEF1\_TRANSDUCED\_ACTIVATED\_CD4\_TCELL\_UP  
GSE40274\_CTRL\_VS\_LEF1\_TRANSDUCED\_ACTIVATED\_CD4\_TCELL\_UP  
142 0.28597918 1.1732935 0.13953489  
0.20399456 1 2325 "tags=30%, list=16%, signal=35%"  
GSE2585\_THYMIC\_DC\_VS\_THYMIC\_MACROPHAGE\_UP  
GSE2585\_THYMIC\_DC\_VS\_THYMIC\_MACROPHAGE\_UP 138  
0.28715542 1.1727268 0.14592275 0.20478435  
1 2188 "tags=22%, list=16%, signal=25%"  
GSE17721\_CTRL\_VS\_PAM3CSK4\_24H\_BMDC\_UP  
GSE17721\_CTRL\_VS\_PAM3CSK4\_24H\_BMDC\_UP 147  
0.2857144 1.172431 0.15151516 0.20513013 1  
1684 "tags=22%, list=12%, signal=24%"  
GSE17974\_CTRL\_VS\_ACT\_IL4\_AND\_ANTI\_IL12\_4H\_CD4\_TCELL\_DN  
GSE17974\_CTRL\_VS\_ACT\_IL4\_AND\_ANTI\_IL12\_4H\_CD4\_TCELL\_DN  
142 0.2829207 1.1721917 0.12554112  
0.20538647 1 1942 "tags=26%, list=14%, signal=30%"  
GSE42724\_MEMORY\_VS\_B1\_BCELL\_UP GSE42724\_MEMORY\_VS\_B1\_BCELL\_UP  
151 0.28362724 1.1719928 0.14128035  
0.20558359 1 2479 "tags=28%, list=18%, signal=34%"  
GSE5589\_LPS\_VS\_LPS\_AND\_IL10\_STIM\_IL10\_KO\_MACROPHAGE\_180MIN\_DN  
GSE5589\_LPS\_VS\_LPS\_AND\_IL10\_STIM\_IL10\_KO\_MACROPHAGE\_180MIN\_DN  
156 0.2795992 1.171856 0.15959597  
0.2056817 1 761 "tags=12%, list=5%, signal=13%"  
GSE3982\_MAC\_VS\_NEUTROPHIL\_LPS\_STIM\_DN



GSE3982\_MAC\_VS\_NEUTROPHIL\_LPS\_STIM\_DN 137  
0.28474018 1.171561 0.15010571 0.20606029 1  
1575 "tags=15%, list=11%, signal=17%"  
GSE36888\_UNTREATED\_VS\_IL2\_TREATED\_STAT5\_AB\_KNOCKIN\_TCELL\_6H\_DN  
GSE36888\_UNTREATED\_VS\_IL2\_TREATED\_STAT5\_AB\_KNOCKIN\_TCELL\_6H\_DN  
135 0.2860132 1.1713535 0.15505618  
0.20626357 1 2824 "tags=34%, list=20%, signal=42%"  
GSE7509\_UNSTIM\_VS\_IFNA\_STIM\_IMMATURE\_DC\_DN  
GSE7509\_UNSTIM\_VS\_IFNA\_STIM\_IMMATURE\_DC\_DN 143  
0.28214768 1.1710103 0.13507625 0.2067074  
1 2332 "tags=30%, list=17%, signal=36%"  
GSE22432\_MULTIPOTENT\_VS\_COMMON\_DC\_PROGENITOR\_UNTREATED\_DN  
GSE22432\_MULTIPOTENT\_VS\_COMMON\_DC\_PROGENITOR\_UNTREATED\_DN  
142 0.28399524 1.1703608 0.14799154  
0.20762171 1 1942 "tags=25%, list=14%, signal=29%"  
GSE2826\_XID\_VS\_BTK\_KO\_BCELL\_UP GSE2826\_XID\_VS\_BTK\_KO\_BCELL\_UP  
157 0.2794386 1.1702198 0.13374485  
0.20772745 1 2056 "tags=22%, list=15%, signal=25%"  
GSE22886\_IGA\_VS\_IGM\_MEMORY\_BCELL\_UP  
GSE22886\_IGA\_VS\_IGM\_MEMORY\_BCELL\_UP 142  
0.2789222 1.1696243 0.13152401 0.2085703  
1 1653 "tags=18%, list=12%, signal=21%"  
GSE13485\_CTRL\_VS\_DAY21\_YF17D\_VACCINE\_PBMC\_UP  
GSE13485\_CTRL\_VS\_DAY21\_YF17D\_VACCINE\_PBMC\_UP 132  
0.28634232 1.1695046 0.15369262 0.20864104  
1 2845 "tags=36%, list=20%, signal=44%"  
GSE11864\_CSF1\_VS\_CSF1\_IFNG\_PAM3CYS\_IN\_MAC\_DN  
GSE11864\_CSF1\_VS\_CSF1\_IFNG\_PAM3CYS\_IN\_MAC\_DN 130  
0.2878956 1.1694355 0.14845361 0.20864101  
1 2444 "tags=28%, list=17%, signal=34%"  
GSE37301\_LYMPHOID\_PRIMED\_MPP\_VS\_PRO\_BCELL\_DN  
GSE37301\_LYMPHOID\_PRIMED\_MPP\_VS\_PRO\_BCELL\_DN 130  
0.28741014 1.1689883 0.1691023 0.2092418  
1 1208 "tags=13%, list=9%, signal=14%"  
GSE23398\_WT\_VS\_IL2\_KO\_CD4\_TCELL\_SCURFY\_MOUSE\_DN  
GSE23398\_WT\_VS\_IL2\_KO\_CD4\_TCELL\_SCURFY\_MOUSE\_DN 143  
0.27836606 1.1686116 0.14822547 0.20969032  
1 2756 "tags=37%, list=20%, signal=46%"  
GSE39820\_TGFBETA3\_IL6\_VS\_TGFBETA3\_IL6\_IL23A\_TREATED\_CD4\_TCELL\_DN  
GSE39820\_TGFBETA3\_IL6\_VS\_TGFBETA3\_IL6\_IL23A\_TREATED\_CD4\_TCELL\_DN  
146 0.2826293 1.1679815 0.14225054  
0.21058667 1 1878 "tags=21%, list=13%, signal=23%"  
GSE43955\_10H\_VS\_30H\_ACT\_CD4\_TCELL\_WITH\_TGFB\_IL6\_UP  
GSE43955\_10H\_VS\_30H\_ACT\_CD4\_TCELL\_WITH\_TGFB\_IL6\_UP 157  
0.28100866 1.167526 0.14648438 0.21117352 1  
2284 "tags=22%, list=16%, signal=26%"  
GSE5099\_DAY3\_VS\_DAY7\_MCSF\_TREATED\_MACROPHAGE\_DN  
GSE5099\_DAY3\_VS\_DAY7\_MCSF\_TREATED\_MACROPHAGE\_DN 120  
0.28878736 1.1675195 0.17327766 0.21107957  
1 1561 "tags=13%, list=11%, signal=15%"  
GSE3982\_BASOPHIL\_VS\_EFF\_MEMORY\_CD4\_TCELL\_DN  
GSE3982\_BASOPHIL\_VS\_EFF\_MEMORY\_CD4\_TCELL\_DN 132  
0.28386325 1.167416 0.13502109 0.21113744 1  
2244 "tags=23%, list=16%, signal=27%"

GSE22601\_DOUBLE\_NEGATIVE\_VS\_DOUBLE\_POSITIVE\_THYMOCYTE\_DN  
GSE22601\_DOUBLE\_NEGATIVE\_VS\_DOUBLE\_POSITIVE\_THYMOCYTE\_DN  
154 0.28148317 1.1671633 0.13293651  
0.2114101 1 1962 "tags=27%, list=14%, signal=31%"  
GSE8685\_IL2\_STARVED\_VS\_IL2\_ACT\_IL2\_STARVED\_CD4\_TCELL\_UP  
GSE8685\_IL2\_STARVED\_VS\_IL2\_ACT\_IL2\_STARVED\_CD4\_TCELL\_UP  
151 0.27951458 1.166879 0.15463917 0.21172836  
1 2108 "tags=28%, list=15%, signal=33%"  
GSE40274\_LEF1\_VS\_FOXP3\_AND\_LEF1\_TRANSDUCED\_ACTIVATED\_CD4\_TCELL\_UP  
GSE40274\_LEF1\_VS\_FOXP3\_AND\_LEF1\_TRANSDUCED\_ACTIVATED\_CD4\_TCELL\_UP  
146 0.2786478 1.1658314 0.14468086  
0.21332274 1 2232 "tags=29%, list=16%, signal=34%"  
GSE5589\_LPS\_VS\_LPS\_AND\_IL6\_STIM\_MACROPHAGE\_45MIN\_UP  
GSE5589\_LPS\_VS\_LPS\_AND\_IL6\_STIM\_MACROPHAGE\_45MIN\_UP  
142 0.284109 1.1657207 0.15800866 0.21340032  
1 2079 "tags=30%, list=15%, signal=35%"  
GSE17974\_CTRL\_VS\_ACT\_IL4\_AND\_ANTI\_IL12\_2H\_CD4\_TCELL\_DN  
GSE17974\_CTRL\_VS\_ACT\_IL4\_AND\_ANTI\_IL12\_2H\_CD4\_TCELL\_DN  
135 0.2872264 1.164638 0.17586912 0.2150659  
1 1702 "tags=21%, list=12%, signal=23%"  
GSE5589\_WT\_VS\_IL6\_KO\_LPS\_STIM\_MACROPHAGE\_45MIN\_UP  
GSE5589\_WT\_VS\_IL6\_KO\_LPS\_STIM\_MACROPHAGE\_45MIN\_UP 133  
0.28945172 1.1640717 0.14439656 0.21586207  
1 2964 "tags=32%, list=21%, signal=40%"  
GSE37534\_UNTREATED\_VS\_PIOGLITAZONE\_TREATED\_CD4\_TCELL\_PPARG1\_AND\_FOXP  
3\_TRANSDUCED\_UP  
GSE37534\_UNTREATED\_VS\_PIOGLITAZONE\_TREATED\_CD4\_TCELL\_PPARG1\_AND\_FOXP  
3\_TRANSDUCED\_UP 127 0.28526008 1.1640682  
0.1663286 0.21576028 1 1711 "tags=18%,  
list=12%, signal=20%"  
GSE360\_L\_MAJOR\_VS\_M\_TUBERCULOSIS\_DC\_UP  
GSE360\_L\_MAJOR\_VS\_M\_TUBERCULOSIS\_DC\_UP 152  
0.27915925 1.1639446 0.15918367 0.21585332  
1 2850 "tags=32%, list=20%, signal=39%"  
GSE18804\_SPLEEN\_MACROPHAGE\_VS\_TUMORAL\_MACROPHAGE\_DN  
GSE18804\_SPLEEN\_MACROPHAGE\_VS\_TUMORAL\_MACROPHAGE\_DN  
127 0.28698578 1.1634214 0.16334662  
0.21658523 1 2439 "tags=27%, list=17%, signal=32%"  
GSE15659\_NAIVE\_CD4\_TCELL\_VS\_RESTING\_TREG\_DN  
GSE15659\_NAIVE\_CD4\_TCELL\_VS\_RESTING\_TREG\_DN 123  
0.28892517 1.1630445 0.18454936 0.21707763  
1 1783 "tags=17%, list=13%, signal=19%"  
GSE3720\_LPS\_VS\_PMA\_STIM\_VD2\_GAMMADELTA\_TCELL\_DN  
GSE3720\_LPS\_VS\_PMA\_STIM\_VD2\_GAMMADELTA\_TCELL\_DN 122  
0.28646746 1.1627725 0.16352202 0.2174212  
1 2461 "tags=22%, list=17%, signal=27%"  
GSE12392\_CD8A\_POS\_VS\_NEG\_SPLEEN\_DC\_UP  
GSE12392\_CD8A\_POS\_VS\_NEG\_SPLEEN\_DC\_UP 167  
0.2754665 1.1625365 0.13865547 0.21768749  
1 2085 "tags=25%, list=15%, signal=29%"  
GSE36891\_UNSTIM\_VS\_PAM\_TLR2\_STIM\_PERITONEAL\_MACROPHAGE\_UP  
GSE36891\_UNSTIM\_VS\_PAM\_TLR2\_STIM\_PERITONEAL\_MACROPHAGE\_UP  
135 0.28323615 1.161967 0.16563147 0.21848276  
1 1713 "tags=21%, list=12%, signal=24%"

GSE37533\_UNTREATED\_VS\_PIOGLIZATONE\_TREATED\_CD4\_TCELL\_PPARG1\_AND\_FOXP  
3\_TRASDUCED\_DN  
GSE37533\_UNTREATED\_VS\_PIOGLIZATONE\_TREATED\_CD4\_TCELL\_PPARG1\_AND\_FOXP  
3\_TRASDUCED\_DN 155 0.2795926 1.1608769  
0.16488223 0.2201278 1 1800 "tags=25%,  
list=13%, signal=28%"  
GSE43955\_10H\_VS\_30H\_ACT\_CD4\_TCELL\_UP  
GSE43955\_10H\_VS\_30H\_ACT\_CD4\_TCELL\_UP 159  
0.27551547 1.160619 0.14102565 0.22043337 1  
1008 "tags=13%, list=7%, signal=13%"  
GSE40666\_STAT1\_KO\_VS\_STAT4\_KO\_CD8\_TCELL\_WITH\_IFNA\_STIM\_90MIN\_UP  
GSE40666\_STAT1\_KO\_VS\_STAT4\_KO\_CD8\_TCELL\_WITH\_IFNA\_STIM\_90MIN\_UP  
125 0.28975087 1.160072 0.16806723  
0.22122711 1 2915 "tags=34%, list=21%, signal=43%"  
GSE22140\_HEALTHY\_VS\_ARTHRTIC\_GERMFREE\_MOUSE\_CD4\_TCELL\_DN  
GSE22140\_HEALTHY\_VS\_ARTHRTIC\_GERMFREE\_MOUSE\_CD4\_TCELL\_DN  
153 0.28221253 1.1599665 0.17745303  
0.22129023 1 1566 "tags=24%, list=11%, signal=26%"  
GSE13306\_RA\_VS\_UNTREATED\_TREG\_DN GSE13306\_RA\_VS\_UNTREATED\_TREG\_DN  
144 0.2818289 1.15955 0.14457831  
0.22186764 1 1743 "tags=17%, list=12%, signal=19%"  
GSE23925\_LIGHT\_ZONE\_VS\_DARK\_ZONE\_BCELL\_UP  
GSE23925\_LIGHT\_ZONE\_VS\_DARK\_ZONE\_BCELL\_UP 141  
0.27985647 1.1594684 0.15448852 0.22189273  
1 2071 "tags=23%, list=15%, signal=26%"  
GSE11961\_FOLLICULAR\_BCELL\_VS\_PLASMA\_CELL\_DAY7\_DN  
GSE11961\_FOLLICULAR\_BCELL\_VS\_PLASMA\_CELL\_DAY7\_DN 134  
0.28432456 1.159352 0.16997792 0.22195785 1  
1848 "tags=25%, list=13%, signal=29%"  
GSE22611\_NOD2\_TRANSDUCED\_VS\_CTRL\_HEK293T\_STIMULATED\_WITH\_MDP\_2H\_UP  
GSE22611\_NOD2\_TRANSDUCED\_VS\_CTRL\_HEK293T\_STIMULATED\_WITH\_MDP\_2H\_UP  
143 0.28368226 1.1590916 0.16969697  
0.22226478 1 2828 "tags=36%, list=20%, signal=45%"  
GSE360\_L\_DONOVANI\_VS\_L\_MAJOR\_DC\_DN  
GSE360\_L\_DONOVANI\_VS\_L\_MAJOR\_DC\_DN 144  
0.28055215 1.1586534 0.17213115 0.22285265  
1 2039 "tags=23%, list=14%, signal=27%"  
GSE36888\_UNTREATED\_VS\_IL2\_TREATED\_TCELL\_2H\_DN  
GSE36888\_UNTREATED\_VS\_IL2\_TREATED\_TCELL\_2H\_DN 138  
0.28262508 1.1585699 0.16803278 0.22286993  
1 2311 "tags=22%, list=16%, signal=27%"  
GSE27786\_LSK\_VS\_NEUTROPHIL\_DN GSE27786\_LSK\_VS\_NEUTROPHIL\_DN  
143 0.28145248 1.1585118 0.17035398  
0.22284359 1 2687 "tags=28%, list=19%, signal=34%"  
GSE21546\_WT\_VS\_ELK1\_KO\_DP\_THYMOCYTES\_DN  
GSE21546\_WT\_VS\_ELK1\_KO\_DP\_THYMOCYTES\_DN 142  
0.28027466 1.1581848 0.17299578 0.22328061  
1 1709 "tags=16%, list=12%, signal=18%"  
GSE27291\_0H\_VS\_6H\_STIM\_GAMMADELTA\_TCELL\_DN  
GSE27291\_0H\_VS\_6H\_STIM\_GAMMADELTA\_TCELL\_DN 117  
0.29253155 1.1580535 0.17171717 0.22338384  
1 2801 "tags=29%, list=20%, signal=36%"  
GSE46143\_CTRL\_VS\_LMP2A\_TRANSDUCED\_CD10\_POS\_GC\_BCELL\_DN  
GSE46143\_CTRL\_VS\_LMP2A\_TRANSDUCED\_CD10\_POS\_GC\_BCELL\_DN

|            |                                                   |                                  |                                   |            |
|------------|---------------------------------------------------|----------------------------------|-----------------------------------|------------|
| 147        | 0.277074                                          | 1.1574701                        | 0.16593887                        | 0.22423433 |
| 1          | 2093                                              | "tags=27%, list=15%, signal=31%" |                                   |            |
| GSE27786   | LSK_VS_NKTCELL_DN                                 |                                  | GSE27786_LSK_VS_NKTCELL_DN        |            |
|            | 132                                               | 0.28461894                       | 1.1565912                         | 0.15303983 |
| 0.22554454 | 1                                                 | 2234                             | "tags=27%, list=16%, signal=32%"  |            |
| GSE37301   | MULTIPOTENT_PROGENITOR_VS_GRAN_MONO_PROGENITOR_DN |                                  |                                   |            |
| GSE37301   | MULTIPOTENT_PROGENITOR_VS_GRAN_MONO_PROGENITOR_DN |                                  |                                   |            |
| 155        | 0.27586654                                        | 1.1559021                        | 0.16666667                        |            |
| 0.22655237 | 1                                                 | 2081                             | "tags=28%, list=15%, signal=33%"  |            |
| GSE11864   | UNTREATED_VS_CSF1_PAM3CYS_IN_MAC_UP               |                                  |                                   |            |
| GSE11864   | UNTREATED_VS_CSF1_PAM3CYS_IN_MAC_UP               |                                  |                                   | 125        |
| 0.2900843  | 1.1555433                                         | 0.17521368                       | 0.22702377                        |            |
| 1          | 2212                                              | "tags=30%, list=16%, signal=35%" |                                   |            |
| GSE3982    | NEUTROPHIL_VS_BASOPHIL_UP                         |                                  | GSE3982_NEUTROPHIL_VS_BASOPHIL_UP |            |
|            | 142                                               | 0.2790322                        | 1.1551957                         | 0.17634408 |
| 0.22747152 | 1                                                 | 2121                             | "tags=25%, list=15%, signal=29%"  |            |
| GSE29164   | UNTREATED_VS_CD8_TCELL_TREATED_MELANOMA_DAY3_UP   |                                  |                                   |            |
| GSE29164   | UNTREATED_VS_CD8_TCELL_TREATED_MELANOMA_DAY3_UP   |                                  |                                   |            |
| 150        | 0.27944398                                        | 1.1551279                        | 0.16043957                        |            |
| 0.22746246 | 1                                                 | 2253                             | "tags=27%, list=16%, signal=32%"  |            |
| GSE15215   | CD2_POS_VS_NEG_PDC_DN                             |                                  | GSE15215_CD2_POS_VS_NEG_PDC_DN    |            |
|            | 145                                               | 0.27886054                       | 1.153933                          | 0.14736842 |
| 0.22933407 | 1                                                 | 3233                             | "tags=39%, list=23%, signal=50%"  |            |
| GSE2770    | UNTREATED_VS_IL4_TREATED_ACT_CD4_TCELL_48H_UP     |                                  |                                   |            |
| GSE2770    | UNTREATED_VS_IL4_TREATED_ACT_CD4_TCELL_48H_UP     |                                  |                                   |            |
| 145        | 0.27865154                                        | 1.1537318                        | 0.18238993                        |            |
| 0.22955637 | 1                                                 | 2887                             | "tags=32%, list=20%, signal=40%"  |            |
| GSE29618   | PRE_VS_DAY7_POST_LAIV_FLU_VACCINE_MONOCYTE_DN     |                                  |                                   |            |
| GSE29618   | PRE_VS_DAY7_POST_LAIV_FLU_VACCINE_MONOCYTE_DN     |                                  |                                   |            |
| 132        | 0.2835915                                         | 1.1536729                        | 0.19496855                        |            |
| 0.22953752 | 1                                                 | 1458                             | "tags=17%, list=10%, signal=18%"  |            |
| GSE2585    | CTEC_VS_THYMIC_DC_DN                              |                                  | GSE2585_CTEC_VS_THYMIC_DC_DN      |            |
|            | 154                                               | 0.2796533                        | 1.1529799                         | 0.15789473 |
| 0.23058766 | 1                                                 | 1865                             | "tags=16%, list=13%, signal=19%"  |            |
| GSE21063   | CTRL_VS_ANTI_IGM_STIM_BCELL_NFATC1_KO_16H_DN      |                                  |                                   |            |
| GSE21063   | CTRL_VS_ANTI_IGM_STIM_BCELL_NFATC1_KO_16H_DN      |                                  |                                   |            |
| 149        | 0.27295968                                        | 1.1526164                        | 0.16255145                        |            |
| 0.23108913 | 1                                                 | 1898                             | "tags=22%, list=13%, signal=25%"  |            |
| GSE6674    | UNSTIM_VS_ANTI_IGM_STIM_BCELL_UP                  |                                  |                                   |            |
| GSE6674    | UNSTIM_VS_ANTI_IGM_STIM_BCELL_UP                  |                                  |                                   | 132        |
| 0.28005606 | 1.1523752                                         | 0.19077568                       | 0.23136653                        |            |
| 1          | 2240                                              | "tags=34%, list=16%, signal=40%" |                                   |            |
| GSE36527   | CD69_NEG_VS_POS_TREG_CD62L_LOS_KLRG1_NEG_UP       |                                  |                                   |            |
| GSE36527   | CD69_NEG_VS_POS_TREG_CD62L_LOS_KLRG1_NEG_UP       |                                  |                                   |            |
| 156        | 0.2788363                                         | 1.1516235                        | 0.17738791                        |            |
| 0.23258194 | 1                                                 | 2360                             | "tags=33%, list=17%, signal=39%"  |            |
| GSE20715   | WT_VS_TLR4_KO_24H_OZONE_LUNG_DN                   |                                  |                                   |            |
| GSE20715   | WT_VS_TLR4_KO_24H_OZONE_LUNG_DN                   |                                  |                                   | 157        |
| 0.2767907  | 1.1511074                                         | 0.19271949                       | 0.23333688                        |            |
| 1          | 2720                                              | "tags=31%, list=19%, signal=38%" |                                   |            |
| GSE13493   | DP_VS_CD4INTCD8POS_THYMOCYTE_DN                   |                                  |                                   |            |
| GSE13493   | DP_VS_CD4INTCD8POS_THYMOCYTE_DN                   |                                  |                                   | 143        |
| 0.27931175 | 1.1493917                                         | 0.17263158                       | 0.23610488                        |            |
| 1          | 2209                                              | "tags=23%, list=16%, signal=27%" |                                   |            |

|                                                                    |                                  |                                  |                                  |            |
|--------------------------------------------------------------------|----------------------------------|----------------------------------|----------------------------------|------------|
| GSE37301_HEMATOPOIETIC_STEM_CELL_VS_PRO_BCELL_UP                   |                                  |                                  |                                  |            |
| GSE37301_HEMATOPOIETIC_STEM_CELL_VS_PRO_BCELL_UP                   |                                  |                                  |                                  | 145        |
| 0.27768373                                                         | 1.1490082                        | 0.15717092                       | 0.23668186                       |            |
| 1                                                                  | 2442                             | "tags=23%, list=17%, signal=27%" |                                  |            |
| GSE37416_0H_VS_3H_F_TULARENSIS_LVS_NEUTROPHIL_DN                   |                                  |                                  |                                  | 134        |
| GSE37416_0H_VS_3H_F_TULARENSIS_LVS_NEUTROPHIL_DN                   |                                  |                                  |                                  | 134        |
| 0.28222635                                                         | 1.1485543                        | 0.17355372                       | 0.23732902                       |            |
| 1                                                                  | 2457                             | "tags=33%, list=17%, signal=39%" |                                  |            |
| GSE360_L_MAJOR_VS_B_MALAYI_LOW_DOSE_MAC_UP                         |                                  |                                  |                                  | 153        |
| GSE360_L_MAJOR_VS_B_MALAYI_LOW_DOSE_MAC_UP                         |                                  |                                  |                                  | 153        |
| 0.27549577                                                         | 1.1484823                        | 0.17047817                       | 0.23734634                       |            |
| 1                                                                  | 2376                             | "tags=23%, list=17%, signal=27%" |                                  |            |
| GSE41978_ID2_KO_VS_BIM_KO_KLRG1_LOW_EFFECTOR_CD8_TCELL_DN          |                                  |                                  |                                  |            |
| GSE41978_ID2_KO_VS_BIM_KO_KLRG1_LOW_EFFECTOR_CD8_TCELL_DN          |                                  |                                  |                                  |            |
| 149                                                                | 0.2802002                        | 1.1482117                        | 0.16432866                       |            |
| 0.23769219                                                         | 1                                | 2647                             | "tags=26%, list=19%, signal=32%" |            |
| GSE17721_CTRL_VS_POLYIC_8H_BMDC_DN                                 |                                  |                                  |                                  | 162        |
| GSE17721_CTRL_VS_POLYIC_8H_BMDC_DN                                 |                                  |                                  |                                  | 162        |
| 0.2725463                                                          | 1.1472214                        | 0.15833333                       | 0.23933002                       |            |
| 1                                                                  | 2043                             | "tags=20%, list=14%, signal=24%" |                                  |            |
| GSE27786_CD8_TCELL_VS_ERYTHROBLAST_UP                              |                                  |                                  |                                  | 149        |
| GSE27786_CD8_TCELL_VS_ERYTHROBLAST_UP                              |                                  |                                  |                                  | 149        |
| 0.2773325                                                          | 1.1468469                        | 0.17922607                       | 0.23986039                       |            |
| 1                                                                  | 2351                             | "tags=29%, list=17%, signal=34%" |                                  |            |
| GSE41867_DAY8_EFFECTOR_VS_DAY30_MEMORY_CD8_TCELL_LCMV_ARMSTRONG_DN |                                  |                                  |                                  |            |
| GSE41867_DAY8_EFFECTOR_VS_DAY30_MEMORY_CD8_TCELL_LCMV_ARMSTRONG_DN |                                  |                                  |                                  |            |
| 0.23988487                                                         | 145                              | 0.27787164                       | 1.1467701                        | 0.17475729 |
| 0.23988487                                                         | 1                                | 2224                             | "tags=24%, list=16%, signal=28%" |            |
| GSE1740_MCSF_VS_MCSF_AND_IFNG_DAY2_DERIVED_MACROPHAGE_UP           |                                  |                                  |                                  |            |
| GSE1740_MCSF_VS_MCSF_AND_IFNG_DAY2_DERIVED_MACROPHAGE_UP           |                                  |                                  |                                  |            |
| 101                                                                | 0.29070634                       | 1.1462668                        | 0.18958333                       |            |
| 0.24062821                                                         | 1                                | 935                              | "tags=10%, list=7%, signal=11%"  |            |
| GSE5099_MONOCYTE_VS_CLASSICAL_M1_MACROPHAGE_UP                     |                                  |                                  |                                  | 138        |
| GSE5099_MONOCYTE_VS_CLASSICAL_M1_MACROPHAGE_UP                     |                                  |                                  |                                  | 138        |
| 0.280507                                                           | 1.1462631                        | 0.17327766                       | 0.24051878                       | 1          |
| 2239                                                               | "tags=23%, list=16%, signal=27%" |                                  |                                  |            |
| GSE30971_WBP7_HET_VS_KO_MACROPHAGE_2H_LPS_STIM_UP                  |                                  |                                  |                                  | 137        |
| GSE30971_WBP7_HET_VS_KO_MACROPHAGE_2H_LPS_STIM_UP                  |                                  |                                  |                                  | 137        |
| 0.28025615                                                         | 1.1458259                        | 0.1719457                        | 0.24115424                       |            |
| 1                                                                  | 2242                             | "tags=28%, list=16%, signal=33%" |                                  |            |
| GSE39820_CTRL_VS_TGFBETA1_IL6_CD4_TCELL_DN                         |                                  |                                  |                                  | 151        |
| GSE39820_CTRL_VS_TGFBETA1_IL6_CD4_TCELL_DN                         |                                  |                                  |                                  | 151        |
| 0.28012407                                                         | 1.1449865                        | 0.18201284                       | 0.24248971                       |            |
| 1                                                                  | 2359                             | "tags=32%, list=17%, signal=38%" |                                  |            |
| GSE17721_0.5H_VS_4H_POLYIC_BMDC_DN                                 |                                  |                                  |                                  | 148        |
| GSE17721_0.5H_VS_4H_POLYIC_BMDC_DN                                 |                                  |                                  |                                  | 148        |
| 0.27470163                                                         | 1.1449196                        | 0.16450216                       | 0.2424756                        |            |
| 1                                                                  | 2494                             | "tags=30%, list=18%, signal=37%" |                                  |            |
| GSE41867_LCMV_ARMSTRONG_VS_CLONE13_DAY8_EFFECTOR_CD8_TCELL_UP      |                                  |                                  |                                  |            |
| GSE41867_LCMV_ARMSTRONG_VS_CLONE13_DAY8_EFFECTOR_CD8_TCELL_UP      |                                  |                                  |                                  |            |
| 0.24253227                                                         | 151                              | 0.27889788                       | 1.1448308                        | 0.16701461 |
| 0.24253227                                                         | 1                                | 2511                             | "tags=30%, list=18%, signal=36%" |            |
| GSE40685_TREG_VS_FOXP3_KO_TREG_PRECURSOR_UP                        |                                  |                                  |                                  |            |
| GSE40685_TREG_VS_FOXP3_KO_TREG_PRECURSOR_UP                        |                                  |                                  |                                  |            |
|                                                                    |                                  |                                  |                                  | 129        |

0.2838551            1.1442635            0.1970339            0.24341482  
1            2358            "tags=29%, list=17%, signal=34%"  
GSE34156\_UNTREATED\_VS\_24H\_TLR1\_TLR2\_LIGAND\_TREATED\_MONOCYTE\_UP  
GSE34156\_UNTREATED\_VS\_24H\_TLR1\_TLR2\_LIGAND\_TREATED\_MONOCYTE\_UP  
          116            0.28492504            1.1442448            0.18655097  
0.24332768            1            1662            "tags=19%, list=12%, signal=21%"  
GSE43955\_TH0\_VS\_TGFB\_IL6\_IL23\_TH17\_ACT\_CD4\_TCELL\_52H\_DN  
GSE43955\_TH0\_VS\_TGFB\_IL6\_IL23\_TH17\_ACT\_CD4\_TCELL\_52H\_DN  
163            0.27416837            1.1441789            0.17735043  
0.24332127            1            2726            "tags=32%, list=19%, signal=39%"  
GSE9988\_ANTI\_TREM1\_VS\_LOW\_LPS\_MONOCYTE\_UP  
GSE9988\_ANTI\_TREM1\_VS\_LOW\_LPS\_MONOCYTE\_UP            137  
0.2787732            1.1437393            0.18987341            0.24396552  
1            2842            "tags=31%, list=20%, signal=38%"  
GSE28726\_NAIVE\_VS\_ACTIVATED\_CD4\_TCELL\_UP  
GSE28726\_NAIVE\_VS\_ACTIVATED\_CD4\_TCELL\_UP            148  
0.27887428            1.143737            0.18875502            0.24385318            1  
1904            "tags=22%, list=13%, signal=26%"  
GSE14000\_UNSTIM\_VS\_16H\_LPS\_DC\_UP            GSE14000\_UNSTIM\_VS\_16H\_LPS\_DC\_UP  
          131            0.28225905            1.1437228            0.18410042  
0.24375804            1            1988            "tags=28%, list=14%, signal=33%"  
GSE32986\_CURDLAN\_HIGHDOSE\_VS\_GMCSF\_AND\_CURDLAN\_HIGHDOSE\_STIM\_DC\_UP  
GSE32986\_CURDLAN\_HIGHDOSE\_VS\_GMCSF\_AND\_CURDLAN\_HIGHDOSE\_STIM\_DC\_UP  
          142            0.27919835            1.1427628            0.1875  
0.24531285            1            1005            "tags=15%, list=7%, signal=16%"  
GSE11884\_WT\_VS\_FURIN\_KO\_NAIVE\_CD4\_TCELL\_DN  
GSE11884\_WT\_VS\_FURIN\_KO\_NAIVE\_CD4\_TCELL\_DN            100  
0.29067376            1.1425321            0.18867925            0.24561585  
1            1516            "tags=17%, list=11%, signal=19%"  
GSE5589\_IL6\_KO\_VS\_IL10\_KO\_LPS\_AND\_IL10\_STIM\_MACROPHAGE\_45MIN\_DN  
GSE5589\_IL6\_KO\_VS\_IL10\_KO\_LPS\_AND\_IL10\_STIM\_MACROPHAGE\_45MIN\_DN  
          149            0.27344882            1.1423587            0.17286652  
0.24580163            1            1742            "tags=20%, list=12%, signal=23%"  
GSE41867\_DAY6\_EFFECTOR\_VS\_DAY30\_MEMORY\_CD8\_TCELL\_LCMV\_ARMSTRONG\_UP  
GSE41867\_DAY6\_EFFECTOR\_VS\_DAY30\_MEMORY\_CD8\_TCELL\_LCMV\_ARMSTRONG\_UP  
          144            0.2795294            1.1423053            0.20568928  
0.2457811            2489            "tags=33%, list=18%, signal=40%"  
GSE24574\_BCL6\_LOW\_TFH\_VS\_NAIVE\_CD4\_TCELL\_UP  
GSE24574\_BCL6\_LOW\_TFH\_VS\_NAIVE\_CD4\_TCELL\_UP            157  
0.27220172            1.1418082            0.15991902            0.24651074  
1            1839            "tags=20%, list=13%, signal=23%"  
GSE1112\_HY\_CD8AB\_VS\_HY\_CD8AA\_THYMOCYTE\_RTOC\_CULTURE\_UP  
GSE1112\_HY\_CD8AB\_VS\_HY\_CD8AA\_THYMOCYTE\_RTOC\_CULTURE\_UP  
108            0.28646937            1.1417587            0.20954357  
0.2464679            1            1180            "tags=16%, list=8%, signal=17%"  
GSE17721\_CTRL\_VS\_PAM3CSK4\_6H\_BMDC\_UP  
GSE17721\_CTRL\_VS\_PAM3CSK4\_6H\_BMDC\_UP            147  
0.2802259            1.1408608            0.1754386            0.24798194  
1            1876            "tags=22%, list=13%, signal=26%"  
GSE2770\_TGFB\_AND\_IL4\_VS\_IL12\_TREATED\_ACT\_CD4\_TCELL\_2H\_UP  
GSE2770\_TGFB\_AND\_IL4\_VS\_IL12\_TREATED\_ACT\_CD4\_TCELL\_2H\_UP  
121            0.28298646            1.1408565            0.19789474  
0.24787048            1            2689            "tags=31%, list=19%, signal=37%"  
GSE20727\_ROS\_INH\_VS\_ROS\_INH\_AND\_DNFB\_ALLERGEN\_TREATED\_DC\_UP

GSE20727\_ROS\_INH\_VS\_ROS\_INH\_AND\_DNFB\_ALLERGEN\_TREATED\_DC\_UP  
139 0.27446833 1.1407251 0.19139785  
0.2479636 1 2350 "tags=25%, list=17%, signal=30%"  
GSE1460\_INTRATHYMIC\_T\_PROGENITOR\_VS\_DP\_THYMOCYTE\_UP  
GSE1460\_INTRATHYMIC\_T\_PROGENITOR\_VS\_DP\_THYMOCYTE\_UP  
147 0.2759142 1.1404384 0.16907217  
0.24832927 1 1614 "tags=19%, list=11%, signal=21%"  
GSE37533\_PPARG1\_FOXP3\_VS\_FOXP3\_TRANSDUCECD4\_TCELL\_PIOGLITAZONE\_TRE  
ATED\_DN  
GSE37533\_PPARG1\_FOXP3\_VS\_FOXP3\_TRANSDUCECD4\_TCELL\_PIOGLITAZONE\_TRE  
ATED\_DN 145 0.27846766 1.1403677  
0.21308017 0.24833514 1 2351 "tags=28%,  
list=17%, signal=33%"  
GSE17721\_LPS\_VS\_GARDIQUIMOD\_8H\_BMDC\_DN  
GSE17721\_LPS\_VS\_GARDIQUIMOD\_8H\_BMDC\_DN 151  
0.27307433 1.1397983 0.19172113 0.24921486  
1 2347 "tags=26%, list=17%, signal=31%"  
GSE14000\_TRANSLATED\_RNA\_VS\_MRNA\_16H\_LPS\_DC\_DN  
GSE14000\_TRANSLATED\_RNA\_VS\_MRNA\_16H\_LPS\_DC\_DN 101  
0.2869578 1.1397436 0.17532468 0.24918917  
1 2019 "tags=26%, list=14%, signal=30%"  
GSE43955\_TH0\_VS\_TGFB\_IL6\_IL23\_TH17\_ACT\_CD4\_TCELL\_60H\_DN  
GSE43955\_TH0\_VS\_TGFB\_IL6\_IL23\_TH17\_ACT\_CD4\_TCELL\_60H\_DN  
152 0.27588025 1.1392145 0.19057377  
0.25002486 1 1986 "tags=26%, list=14%, signal=30%"  
GSE1112\_OT1\_VS\_HY\_CD8AB\_THYMOCYTE\_RT0C\_CULTURE\_DN  
GSE1112\_OT1\_VS\_HY\_CD8AB\_THYMOCYTE\_RT0C\_CULTURE\_DN 133  
0.2775867 1.1390938 0.19491525 0.2501113  
1 2172 "tags=29%, list=15%, signal=33%"  
GSE27291\_0H\_VS\_6H\_STIM\_GAMMADELTA\_TCELL\_UP  
GSE27291\_0H\_VS\_6H\_STIM\_GAMMADELTA\_TCELL\_UP 110  
0.2883205 1.1386794 0.22546972 0.25073713  
1 2735 "tags=29%, list=19%, signal=36%"  
GSE8621\_UNSTIM\_VS\_LPS\_STIM\_MACROPHAGE\_UP  
GSE8621\_UNSTIM\_VS\_LPS\_STIM\_MACROPHAGE\_UP 140  
0.27511817 1.1385461 0.1910828 0.25085545  
1 1493 "tags=14%, list=11%, signal=16%"  
GSE15659\_NAIVE\_CD4\_TCELL\_VS\_NONSUPPRESSIVE\_TCELL\_DN  
GSE15659\_NAIVE\_CD4\_TCELL\_VS\_NONSUPPRESSIVE\_TCELL\_DN  
140 0.27756384 1.1381567 0.19474836  
0.25140953 1 1527 "tags=16%, list=11%, signal=18%"  
GSE10422\_WT\_VS\_BAFF\_TRANSGENIC\_LN\_BCELL\_UP  
GSE10422\_WT\_VS\_BAFF\_TRANSGENIC\_LN\_BCELL\_UP 132  
0.2804258 1.1379803 0.19832985 0.2516137  
1 2093 "tags=28%, list=15%, signal=33%"  
GSE1740\_UNSTIM\_VS\_IFNA\_STIMULATED\_MCSF\_IFNG\_DERIVED\_MACROPHAGE\_DN  
GSE1740\_UNSTIM\_VS\_IFNA\_STIMULATED\_MCSF\_IFNG\_DERIVED\_MACROPHAGE\_DN  
135 0.2723063 1.1374297 0.18526316  
0.25249135 1 2106 "tags=22%, list=15%, signal=26%"  
GSE21774\_CD62L\_POS\_CD56\_DIM\_VS\_CD62L\_NEG\_CD56\_DIM\_NK\_CELL\_DN  
GSE21774\_CD62L\_POS\_CD56\_DIM\_VS\_CD62L\_NEG\_CD56\_DIM\_NK\_CELL\_DN  
145 0.27627552 1.1361454 0.1912088  
0.25470966 1 1761 "tags=19%, list=12%, signal=22%"  
GSE43955\_TH0\_VS\_TGFB\_IL6\_IL23\_TH17\_ACT\_CD4\_TCELL\_60H\_UP

GSE43955\_TH0\_VS\_TGFB\_IL6\_IL23\_TH17\_ACT\_CD4\_TCELL\_60H\_UP  
161 0.27236494 1.1346877 0.17634408  
0.25714308 1 1438 "tags=17%, list=10%, signal=18%"  
GSE29618\_LAIV\_VS\_TIV\_FLU\_VACCINE\_DAY7\_PDC\_UP  
GSE29618\_LAIV\_VS\_TIV\_FLU\_VACCINE\_DAY7\_PDC\_UP 133  
0.2779769 1.1344913 0.18897638 0.25739872  
1 1946 "tags=23%, list=14%, signal=26%"  
GSE22601\_IMMATURE\_CD4\_SINGLE\_POSITIVE\_VS\_CD4\_SINGLE\_POSITIVE\_THYMOCY  
TE\_DN  
GSE22601\_IMMATURE\_CD4\_SINGLE\_POSITIVE\_VS\_CD4\_SINGLE\_POSITIVE\_THYMOCY  
TE\_DN 131 0.27842712 1.1343275  
0.22083333 0.25756338 1 2379 "tags=32%,  
list=17%, signal=38%"  
GSE21670\_UNTREATED\_VS\_IL6\_TREATED\_STAT3\_KO\_CD4\_TCELL\_DN  
GSE21670\_UNTREATED\_VS\_IL6\_TREATED\_STAT3\_KO\_CD4\_TCELL\_DN  
143 0.2750507 1.1341965 0.21975806  
0.25766477 1 2422 "tags=28%, list=17%, signal=33%"  
GSE37301\_HEMATOPOIETIC\_STEM\_CELL\_VS\_LYMPHOID\_PRIMED\_MPP\_DN  
GSE37301\_HEMATOPOIETIC\_STEM\_CELL\_VS\_LYMPHOID\_PRIMED\_MPP\_DN  
128 0.28051746 1.134046 0.18105263 0.2578064  
1 2470 "tags=27%, list=18%, signal=32%"  
GSE17721\_CPG\_VS\_GARDIQUIMOD\_4H\_BMDC\_DN  
GSE17721\_CPG\_VS\_GARDIQUIMOD\_4H\_BMDC\_DN 152  
0.26908535 1.1340419 0.16883117 0.25768614  
1 1894 "tags=22%, list=13%, signal=26%"  
GSE3982\_CTRL\_VS\_LPS\_48H\_DC\_UP GSE3982\_CTRL\_VS\_LPS\_48H\_DC\_UP  
131 0.27853954 1.1337614 0.19254659  
0.25806805 1 1242 "tags=13%, list=9%, signal=14%"  
GSE37301\_CD4\_TCELL\_VS\_RAG2\_KO\_NK\_CELL\_DN  
GSE37301\_CD4\_TCELL\_VS\_RAG2\_KO\_NK\_CELL\_DN 142  
0.27873573 1.1333386 0.20181406 0.25872126  
1 2321 "tags=30%, list=16%, signal=35%"  
GSE11961\_MEMORY\_BCELL\_DAY7\_VS\_PLASMA\_CELL\_DAY7\_DN  
GSE11961\_MEMORY\_BCELL\_DAY7\_VS\_PLASMA\_CELL\_DAY7\_DN 147  
0.2764768 1.1319634 0.22342733 0.2610807  
1 2427 "tags=27%, list=17%, signal=33%"  
GSE37532\_TREG\_VS\_TCONV\_CD4\_TCELL\_FROM\_LN\_DN  
GSE37532\_TREG\_VS\_TCONV\_CD4\_TCELL\_FROM\_LN\_DN 133  
0.27743912 1.1319103 0.21042085 0.2610512  
1 2004 "tags=26%, list=14%, signal=30%"  
GSE43863\_LY6C\_INT\_CXCR5POS\_VS\_LY6C\_LOW\_CXCR5NEG\_EFFECTOR\_CD4\_TCELL\_U  
P  
GSE43863\_LY6C\_INT\_CXCR5POS\_VS\_LY6C\_LOW\_CXCR5NEG\_EFFECTOR\_CD4\_TCELL\_U  
P 155 0.27177107 1.1318285  
0.19389978 0.261068 1 1573 "tags=19%, list=11%,  
signal=21%"  
GSE3720\_UNSTIM\_VS\_LPS\_STIM\_VD2\_GAMMADELTA\_TCELL\_DN  
GSE3720\_UNSTIM\_VS\_LPS\_STIM\_VD2\_GAMMADELTA\_TCELL\_DN 114  
0.2913503 1.1317446 0.23770492 0.26109186  
1 1964 "tags=21%, list=14%, signal=24%"  
GSE26669\_CD4\_VS\_CD8\_TCELL\_IN\_MLR\_COSTIM\_BLOCK\_DN  
GSE26669\_CD4\_VS\_CD8\_TCELL\_IN\_MLR\_COSTIM\_BLOCK\_DN 139  
0.27472037 1.1312581 0.21311475 0.26183552  
1 1686 "tags=20%, list=12%, signal=23%"



GSE26290\_WT\_VS\_PDK1\_KO\_ANTI\_CD3\_AND\_IL2\_STIM\_CD8\_TCELL\_DN  
GSE26290\_WT\_VS\_PDK1\_KO\_ANTI\_CD3\_AND\_IL2\_STIM\_CD8\_TCELL\_DN  
154 0.27100328 1.1309574 0.18502203  
0.26225534 1 2481 "tags=30%, list=18%, signal=36%"  
GSE1432\_CTRL\_VS\_IFNG\_1H\_MICROGLIA\_UP  
GSE1432\_CTRL\_VS\_IFNG\_1H\_MICROGLIA\_UP 135  
0.27429616 1.1305327 0.19088937 0.26294023  
1 1718 "tags=21%, list=12%, signal=24%"  
GSE6092\_UNSTIM\_VS\_IFNG\_STIM\_ENDOTHELIAL\_CELL\_UP  
GSE6092\_UNSTIM\_VS\_IFNG\_STIM\_ENDOTHELIAL\_CELL\_UP 151  
0.27057016 1.1299282 0.2164009 0.26391196  
1 2663 "tags=28%, list=19%, signal=35%"  
GSE25088\_CTRL\_VS\_ROSIGLITAZONE\_STIM\_STAT6\_KO\_MACROPHAGE\_UP  
GSE25088\_CTRL\_VS\_ROSIGLITAZONE\_STIM\_STAT6\_KO\_MACROPHAGE\_UP  
98 0.28806758 1.1298342 0.24421053  
0.26395893 1 1889 "tags=22%, list=13%, signal=26%"  
GSE44649\_NAIVE\_VS\_ACTIVATED\_CD8\_TCELL\_MIR155\_KO\_UP  
GSE44649\_NAIVE\_VS\_ACTIVATED\_CD8\_TCELL\_MIR155\_KO\_UP 158  
0.2699613 1.1297195 0.17610063 0.26406428  
1 2374 "tags=28%, list=17%, signal=34%"  
GSE21927\_SPLEEN\_VS\_C26GM\_TUMOR\_MONOCYTE\_BALBC\_DN  
GSE21927\_SPLEEN\_VS\_C26GM\_TUMOR\_MONOCYTE\_BALBC\_DN 125  
0.27862084 1.129561 0.1891348 0.2642335 1  
2122 "tags=23%, list=15%, signal=27%"  
GSE23308\_CTRL\_VS\_CORTICOSTERONE\_TREATED\_MACROPHAGE\_MINERALCORTICOID\_REC\_KO\_UP  
GSE23308\_CTRL\_VS\_CORTICOSTERONE\_TREATED\_MACROPHAGE\_MINERALCORTICOID\_REC\_KO\_UP  
151 0.27044994 1.1295274  
0.171875 0.26416302 1 2317 "tags=30%, list=16%, signal=36%"  
GSE15735\_CTRL\_VS\_HDAC\_INHIBITOR\_TREATED\_CD4\_TCELL\_12H\_DN  
GSE15735\_CTRL\_VS\_HDAC\_INHIBITOR\_TREATED\_CD4\_TCELL\_12H\_DN  
142 0.2730121 1.1294975 0.2012848 0.264093  
1 1621 "tags=25%, list=11%, signal=28%"  
GSE22103\_UNSTIM\_VS\_GMCSF\_AND\_IFNG\_STIM\_NEUTROPHIL\_UP  
GSE22103\_UNSTIM\_VS\_GMCSF\_AND\_IFNG\_STIM\_NEUTROPHIL\_UP  
127 0.28013352 1.1291807 0.20250522  
0.2645553 1 2644 "tags=33%, list=19%, signal=40%"  
GSE28130\_ACTIVATED\_VS\_INDUCED\_TREG\_DN  
GSE28130\_ACTIVATED\_VS\_INDUCED\_TREG\_DN 151  
0.2689983 1.1290562 0.18444444 0.2646549  
1 807 "tags=11%, list=6%, signal=12%"  
GSE2770\_TGFB\_AND\_IL4\_VS\_IL4\_TREATED\_ACT\_CD4\_TCELL\_6H\_UP  
GSE2770\_TGFB\_AND\_IL4\_VS\_IL4\_TREATED\_ACT\_CD4\_TCELL\_6H\_UP  
127 0.2768868 1.1290141 0.2058212  
0.2646183 1 2507 "tags=28%, list=18%, signal=34%"  
GSE27786\_CD8\_TCELL\_VS\_NEUTROPHIL\_UP  
GSE27786\_CD8\_TCELL\_VS\_NEUTROPHIL\_UP 140  
0.27373245 1.1286917 0.20421052 0.26509267  
1 2533 "tags=31%, list=18%, signal=38%"  
GSE19888\_ADENOSINE\_A3R\_ACT\_VS\_TCELL\_MEMBRANES\_ACT\_AND\_A3R\_INH\_PRETREAT\_IN\_MAST\_CELL\_UP  
GSE19888\_ADENOSINE\_A3R\_ACT\_VS\_TCELL\_MEMBRANES\_ACT\_AND\_A3R\_INH\_PRETREAT\_IN\_MAST\_CELL\_UP  
114 0.28549436 1.128566



|                                                                               |                                  |                                  |                                  |
|-------------------------------------------------------------------------------|----------------------------------|----------------------------------|----------------------------------|
| 0.27108172                                                                    | 1.1222476                        | 0.19795918                       | 0.27519885                       |
| 1                                                                             | 2041                             | "tags=24%, list=14%, signal=28%" |                                  |
| GSE29618_MONOCYTE_VS_PDC_DAY7_FLU_VACCINE_DN                                  |                                  |                                  |                                  |
| GSE29618_MONOCYTE_VS_PDC_DAY7_FLU_VACCINE_DN                                  |                                  |                                  |                                  |
|                                                                               |                                  |                                  | 150                              |
| 0.27129865                                                                    | 1.1218994                        | 0.20892495                       | 0.2757571                        |
| 1900                                                                          | "tags=21%, list=13%, signal=24%" |                                  |                                  |
| GSE2826_WT_VS_XID_BCELL_DN                                                    |                                  |                                  |                                  |
| GSE2826_WT_VS_XID_BCELL_DN                                                    |                                  |                                  |                                  |
|                                                                               | 164                              | 0.26561394                       | 1.1216809                        |
|                                                                               |                                  |                                  | 0.19087137                       |
| 0.27606857                                                                    | 1                                | 1912                             | "tags=20%, list=14%, signal=23%" |
| GSE6674_ANTI_IGM_VS_ANTI_IGM_AND_CPG_STIM_BCELL_DN                            |                                  |                                  |                                  |
| GSE6674_ANTI_IGM_VS_ANTI_IGM_AND_CPG_STIM_BCELL_DN                            |                                  |                                  |                                  |
|                                                                               |                                  |                                  | 149                              |
| 0.27030686                                                                    | 1.1214112                        | 0.20159681                       | 0.27646104                       |
| 1                                                                             | 2388                             | "tags=30%, list=17%, signal=36%" |                                  |
| GSE22935_WT_VS_MYD88_KO_MACROPHAGE_24H_MBOVIS_BCG_STIM_UP                     |                                  |                                  |                                  |
| GSE22935_WT_VS_MYD88_KO_MACROPHAGE_24H_MBOVIS_BCG_STIM_UP                     |                                  |                                  |                                  |
| 139                                                                           | 0.27465943                       | 1.1210556                        | 0.23312883                       |
| 0.2770044                                                                     | 1                                | 2559                             | "tags=29%, list=18%, signal=36%" |
| GSE4748_CTRL_VS_LPS_STIM_DC_3H_DN                                             |                                  |                                  |                                  |
| GSE4748_CTRL_VS_LPS_STIM_DC_3H_DN                                             |                                  |                                  |                                  |
|                                                                               | 160                              | 0.2638852                        | 1.1209867                        |
|                                                                               |                                  |                                  | 0.21138212                       |
| 0.2769967                                                                     | 1                                | 2374                             | "tags=24%, list=17%, signal=29%" |
| GSE21546_WT_VS_SAP1A_KO_DP_THYMOCYTES_DN                                      |                                  |                                  |                                  |
| GSE21546_WT_VS_SAP1A_KO_DP_THYMOCYTES_DN                                      |                                  |                                  |                                  |
|                                                                               |                                  |                                  | 108                              |
| 0.28067702                                                                    | 1.1208951                        | 0.22559653                       | 0.27702385                       |
| 1                                                                             | 2094                             | "tags=23%, list=15%, signal=27%" |                                  |
| GSE23114_PERITONEAL_CAVITY_B1A_BCELL_VS_SPLEEN_BCELL_IN_SLE2C1_MOUSE_UP       |                                  |                                  |                                  |
| GSE23114_PERITONEAL_CAVITY_B1A_BCELL_VS_SPLEEN_BCELL_IN_SLE2C1_MOUSE_UP       |                                  |                                  |                                  |
|                                                                               | 153                              | 0.2678941                        | 1.1202372                        |
| 0.22336066                                                                    | 0.27808997                       | 1                                | 1571                             |
|                                                                               |                                  |                                  | "tags=16%, list=11%, signal=18%" |
| GSE8835_CD4_VS_CD8_TCELL_UP                                                   |                                  |                                  |                                  |
| GSE8835_CD4_VS_CD8_TCELL_UP                                                   |                                  |                                  |                                  |
|                                                                               | 149                              | 0.27236634                       | 1.1198269                        |
|                                                                               |                                  |                                  | 0.21906693                       |
| 0.27876806                                                                    | 1                                | 2897                             | "tags=33%, list=21%, signal=41%" |
| GSE34156_TLR1_TLR2_LIGAND_VS_NOD2_AND_TLR1_TLR2_LIGAND_6H_TREATED_MONOCYTE_UP |                                  |                                  |                                  |
| GSE34156_TLR1_TLR2_LIGAND_VS_NOD2_AND_TLR1_TLR2_LIGAND_6H_TREATED_MONOCYTE_UP |                                  |                                  |                                  |
|                                                                               |                                  | 130                              | 0.2751437                        |
|                                                                               |                                  |                                  | 1.1197025                        |
| 0.20781893                                                                    | 0.27885842                       | 1                                | 2393                             |
|                                                                               |                                  |                                  | "tags=26%, list=17%, signal=31%" |
| GSE360_DC_VS_MAC_M_TUBERCULOSIS_DN                                            |                                  |                                  |                                  |
| GSE360_DC_VS_MAC_M_TUBERCULOSIS_DN                                            |                                  |                                  |                                  |
|                                                                               |                                  |                                  | 147                              |
| 0.26756567                                                                    | 1.1196516                        | 0.2238193                        | 0.27882844                       |
| 1                                                                             | 1982                             | "tags=24%, list=14%, signal=27%" |                                  |
| GSE40274_CTRL_VS_FOXP3_AND_IRF4_TRANSDUCED_ACTIVATED_CD4_TCELL_UP             |                                  |                                  |                                  |
| GSE40274_CTRL_VS_FOXP3_AND_IRF4_TRANSDUCED_ACTIVATED_CD4_TCELL_UP             |                                  |                                  |                                  |
|                                                                               | 120                              | 0.27690738                       | 1.1194528                        |
|                                                                               |                                  |                                  | 0.21063395                       |
| 0.27908072                                                                    | 1                                | 1700                             | "tags=19%, list=12%, signal=22%" |
| GSE19198_1H_VS_24H_IL21_TREATED_TCELL_UP                                      |                                  |                                  |                                  |
| GSE19198_1H_VS_24H_IL21_TREATED_TCELL_UP                                      |                                  |                                  |                                  |
|                                                                               |                                  |                                  | 153                              |
| 0.26548585                                                                    | 1.119128                         | 0.22689076                       | 0.27954724                       |
| 1120                                                                          | "tags=16%, list=8%, signal=18%"  |                                  |                                  |
| GSE11961_MARGINAL_ZONE_BCELL_VS_MEMORY_BCELL_DAY7_UP                          |                                  |                                  |                                  |
| GSE11961_MARGINAL_ZONE_BCELL_VS_MEMORY_BCELL_DAY7_UP                          |                                  |                                  |                                  |
| 140                                                                           | 0.27069244                       | 1.1174637                        | 0.21802935                       |

|                                                                         |                                                                         |                                  |                                  |                                  |
|-------------------------------------------------------------------------|-------------------------------------------------------------------------|----------------------------------|----------------------------------|----------------------------------|
| 0.2825133                                                               | 1                                                                       | 1498                             | "tags=17%, list=11%, signal=19%" |                                  |
| GSE3039_CD4_TCELL_VS_B1_BCELL_DN                                        | GSE3039_CD4_TCELL_VS_B1_BCELL_DN                                        |                                  |                                  |                                  |
| 142                                                                     | 0.27795365                                                              | 1.1173941                        | 0.24395604                       |                                  |
| 0.2825157                                                               | 1                                                                       | 1511                             | "tags=17%, list=11%, signal=19%" |                                  |
| GSE21360_NAIVE_VS_SECONDARY_MEMORY_CD8_TCELL_DN                         | GSE21360_NAIVE_VS_SECONDARY_MEMORY_CD8_TCELL_DN                         |                                  |                                  |                                  |
|                                                                         |                                                                         |                                  |                                  | 137                              |
| 0.273648                                                                | 1.1170089                                                               | 0.2208589                        | 0.28313136                       | 1                                |
| 1605                                                                    | "tags=22%, list=11%, signal=24%"                                        |                                  |                                  |                                  |
| GSE34156_UNTREATED_VS_6H_NOD2_LIGAND_TREATED_MONOCYTE_UP                | GSE34156_UNTREATED_VS_6H_NOD2_LIGAND_TREATED_MONOCYTE_UP                |                                  |                                  |                                  |
| 141                                                                     | 0.273194                                                                | 1.1168048                        | 0.22912206                       | 0.28341675                       |
| 1                                                                       | 2414                                                                    | "tags=29%, list=17%, signal=35%" |                                  |                                  |
| GSE2770_IL12_VS_TGFB_AND_IL12_TREATED_ACT_CD4_TCELL_2H_DN               | GSE2770_IL12_VS_TGFB_AND_IL12_TREATED_ACT_CD4_TCELL_2H_DN               |                                  |                                  |                                  |
| 124                                                                     | 0.27546877                                                              | 1.1166613                        | 0.22745901                       |                                  |
| 0.28355592                                                              | 1                                                                       | 1828                             | "tags=19%, list=13%, signal=22%" |                                  |
| GSE34156_UNTREATED_VS_24H_NOD2_AND_TLR1_TLR2_LIGAND_TREATED_MONOCYTE_UP | GSE34156_UNTREATED_VS_24H_NOD2_AND_TLR1_TLR2_LIGAND_TREATED_MONOCYTE_UP |                                  |                                  |                                  |
|                                                                         | 119                                                                     | 0.28022242                       | 1.1166569                        |                                  |
| 0.23240939                                                              | 0.283432                                                                | 1                                | 1602                             | "tags=19%, list=11%, signal=22%" |
| GSE40274_EOS_VS_FOXP3_AND_EOS_TRANSDUCE_ACTIVATED_CD4_TCELL_UP          | GSE40274_EOS_VS_FOXP3_AND_EOS_TRANSDUCE_ACTIVATED_CD4_TCELL_UP          |                                  |                                  |                                  |
| 123                                                                     | 0.27765015                                                              | 1.1165992                        | 0.21888413                       |                                  |
| 0.28342354                                                              | 1                                                                       | 2560                             | "tags=29%, list=18%, signal=35%" |                                  |
| GSE22935_WT_VS_MYD88_KO_MACROPHAGE_24H_MBOVIS_BCG_STIM_DN               | GSE22935_WT_VS_MYD88_KO_MACROPHAGE_24H_MBOVIS_BCG_STIM_DN               |                                  |                                  |                                  |
| 151                                                                     | 0.26787144                                                              | 1.1163695                        | 0.20876826                       |                                  |
| 0.28373495                                                              | 1                                                                       | 2003                             | "tags=25%, list=14%, signal=28%" |                                  |
| GSE7509_DC_VS_MONOCYTE_UP                                               | GSE7509_DC_VS_MONOCYTE_UP                                               |                                  |                                  | 164                              |
| 0.26571247                                                              | 1.1153172                                                               | 0.21978022                       | 0.28568727                       |                                  |
| 1                                                                       | 2293                                                                    | "tags=25%, list=16%, signal=30%" |                                  |                                  |
| GSE19888_ADENOSINE_A3R_ACT_VS_TCELL_MEMBRANES_ACT_IN_MAST_CELL_DN       | GSE19888_ADENOSINE_A3R_ACT_VS_TCELL_MEMBRANES_ACT_IN_MAST_CELL_DN       |                                  |                                  |                                  |
| 115                                                                     | 0.28144428                                                              | 1.1149768                        | 0.24416135                       |                                  |
| 0.28621727                                                              | 1                                                                       | 1982                             | "tags=22%, list=14%, signal=25%" |                                  |
| GSE22886_DC_VS_MONOCYTE_UP                                              | GSE22886_DC_VS_MONOCYTE_UP                                              |                                  |                                  |                                  |
| 145                                                                     | 0.27102882                                                              | 1.1148081                        | 0.2402464                        |                                  |
| 0.28639874                                                              | 1                                                                       | 2132                             | "tags=24%, list=15%, signal=28%" |                                  |
| GSE46606_IRF4HIGH_VS_IRF4MID_CD40L_IL2_IL5_DAY3_STIMULATED_BCELL_UP     | GSE46606_IRF4HIGH_VS_IRF4MID_CD40L_IL2_IL5_DAY3_STIMULATED_BCELL_UP     |                                  |                                  |                                  |
| 147                                                                     | 0.26993844                                                              | 1.1146617                        | 0.22420634                       |                                  |
| 0.28654927                                                              | 1                                                                       | 1195                             | "tags=17%, list=8%, signal=18%"  |                                  |
| GSE360_L_DONOVANI_VS_M_TUBERCULOSIS_DC_DN                               | GSE360_L_DONOVANI_VS_M_TUBERCULOSIS_DC_DN                               |                                  |                                  |                                  |
|                                                                         |                                                                         |                                  |                                  | 151                              |
| 0.26968694                                                              | 1.1145645                                                               | 0.22083333                       | 0.28661242                       |                                  |
| 1                                                                       | 2424                                                                    | "tags=29%, list=17%, signal=35%" |                                  |                                  |
| GSE3982_CTRL_VS_LPS_4H_MAC_DN                                           | GSE3982_CTRL_VS_LPS_4H_MAC_DN                                           |                                  |                                  |                                  |
| 160                                                                     | 0.26710144                                                              | 1.1145213                        | 0.21029083                       |                                  |
| 0.28656512                                                              | 1                                                                       | 2421                             | "tags=29%, list=17%, signal=34%" |                                  |
| GSE37605_FOXP3_FUSION_GFP_VS_IRES_GFP_TREG_NOD_DN                       | GSE37605_FOXP3_FUSION_GFP_VS_IRES_GFP_TREG_NOD_DN                       |                                  |                                  |                                  |
|                                                                         |                                                                         |                                  |                                  | 127                              |
| 0.27858612                                                              | 1.1144168                                                               | 0.2275574                        | 0.28662315                       |                                  |

|                                                        |                                  |                                  |                                  |            |
|--------------------------------------------------------|----------------------------------|----------------------------------|----------------------------------|------------|
| 1                                                      | 2361                             | "tags=30%, list=17%, signal=36%" |                                  |            |
| GSE22886_CD8_VS_CD4_NAIVE_TCELL_UP                     |                                  |                                  |                                  |            |
| GSE22886_CD8_VS_CD4_NAIVE_TCELL_UP                     |                                  |                                  |                                  |            |
|                                                        |                                  |                                  |                                  | 152        |
| 0.26571286                                             | 1.1137663                        | 0.23044397                       |                                  | 0.28778255 |
| 1                                                      | 2355                             | "tags=33%, list=17%, signal=39%" |                                  |            |
| GSE1791_CTRL_VS_NEUROMEDINU_IN_T_CELL_LINE_3H_UP       |                                  |                                  |                                  |            |
| GSE1791_CTRL_VS_NEUROMEDINU_IN_T_CELL_LINE_3H_UP       |                                  |                                  |                                  |            |
|                                                        |                                  |                                  |                                  | 102        |
| 0.28322008                                             | 1.1130936                        | 0.25701943                       |                                  | 0.28896812 |
| 1                                                      | 1543                             | "tags=23%, list=11%, signal=25%" |                                  |            |
| GSE37605_NOD_VS_C57BL6_IRES_GFP_TREG_DN                |                                  |                                  |                                  |            |
| GSE37605_NOD_VS_C57BL6_IRES_GFP_TREG_DN                |                                  |                                  |                                  |            |
|                                                        |                                  |                                  |                                  | 128        |
| 0.27421153                                             | 1.1125677                        | 0.20726496                       |                                  | 0.28983566 |
| 1                                                      | 2422                             | "tags=25%, list=17%, signal=30%" |                                  |            |
| GSE13485_DAY7_VS_DAY21_YF17D_VACCINE_PBMC_UP           |                                  |                                  |                                  |            |
| GSE13485_DAY7_VS_DAY21_YF17D_VACCINE_PBMC_UP           |                                  |                                  |                                  |            |
|                                                        |                                  |                                  |                                  | 128        |
| 0.2706835                                              | 1.1121224                        | 0.23516949                       |                                  | 0.29053187 |
| 1                                                      | 1876                             | "tags=20%, list=13%, signal=22%" |                                  |            |
| GSE11864_UNTREATED_VS_CSF1_IFNG_IN_MAC_UP              |                                  |                                  |                                  |            |
| GSE11864_UNTREATED_VS_CSF1_IFNG_IN_MAC_UP              |                                  |                                  |                                  |            |
|                                                        |                                  |                                  |                                  | 136        |
| 0.27260992                                             | 1.1120397                        | 0.22532189                       |                                  | 0.29056504 |
| 1                                                      | 2190                             | "tags=26%, list=16%, signal=30%" |                                  |            |
| GSE339_CD4POS_VS_CD8POS_DC_UP                          |                                  |                                  |                                  |            |
| GSE339_CD4POS_VS_CD8POS_DC_UP                          |                                  |                                  |                                  |            |
|                                                        |                                  |                                  |                                  |            |
|                                                        | 160                              | 0.26343176                       | 1.1109016                        | 0.23443983 |
| 0.2926185                                              | 1                                | 2006                             | "tags=22%, list=14%, signal=25%" |            |
| GSE3982_EFF_MEMORY_VS_CENT_MEMORY_CD4_TCELL_UP         |                                  |                                  |                                  |            |
| GSE3982_EFF_MEMORY_VS_CENT_MEMORY_CD4_TCELL_UP         |                                  |                                  |                                  |            |
|                                                        |                                  |                                  |                                  | 133        |
| 0.27316394                                             | 1.1102306                        | 0.22362868                       |                                  | 0.29382846 |
| 1                                                      | 1705                             | "tags=21%, list=12%, signal=24%" |                                  |            |
| GSE3982_EOSINOPHIL_VS_BASOPHIL_DN                      |                                  |                                  |                                  |            |
| GSE3982_EOSINOPHIL_VS_BASOPHIL_DN                      |                                  |                                  |                                  |            |
|                                                        |                                  |                                  |                                  |            |
|                                                        | 130                              | 0.27273476                       | 1.1101494                        | 0.24672489 |
| 0.29385108                                             | 1                                | 1862                             | "tags=26%, list=13%, signal=30%" |            |
| GSE24726_WT_VS_E2_2_KO_PDC_DN                          |                                  |                                  |                                  |            |
| GSE24726_WT_VS_E2_2_KO_PDC_DN                          |                                  |                                  |                                  |            |
|                                                        |                                  |                                  |                                  |            |
|                                                        | 152                              | 0.26555514                       | 1.1099943                        | 0.24678111 |
| 0.29403445                                             | 1                                | 2648                             | "tags=34%, list=19%, signal=42%" |            |
| GSE22589_HEALTHY_VS_HIV_INFECTED_DC_UP                 |                                  |                                  |                                  |            |
| GSE22589_HEALTHY_VS_HIV_INFECTED_DC_UP                 |                                  |                                  |                                  |            |
|                                                        |                                  |                                  |                                  | 143        |
| 0.27471006                                             | 1.1093457                        | 0.23780487                       |                                  | 0.29517257 |
| 1                                                      | 2551                             | "tags=31%, list=18%, signal=37%" |                                  |            |
| GSE26928_CENTR_MEMORY_VS_CXCR5_POS_CD4_TCELL_UP        |                                  |                                  |                                  |            |
| GSE26928_CENTR_MEMORY_VS_CXCR5_POS_CD4_TCELL_UP        |                                  |                                  |                                  |            |
|                                                        |                                  |                                  |                                  | 118        |
| 0.27868643                                             | 1.109101                         | 0.25910065                       | 0.29551247                       | 1          |
| 2255                                                   | "tags=23%, list=16%, signal=27%" |                                  |                                  |            |
| GSE5589_UNSTIM_VS_45MIN_LPS_AND_IL6_STIM_MACROPHAGE_UP |                                  |                                  |                                  |            |
| GSE5589_UNSTIM_VS_45MIN_LPS_AND_IL6_STIM_MACROPHAGE_UP |                                  |                                  |                                  |            |
|                                                        |                                  |                                  |                                  |            |
| 146                                                    | 0.26604852                       | 1.1091006                        | 0.2079832                        |            |
| 0.2953772                                              | 1                                | 2033                             | "tags=25%, list=14%, signal=29%" |            |
| GSE24292_WT_VS_PPARG_KO_MACROPHAGE_UP                  |                                  |                                  |                                  |            |
| GSE24292_WT_VS_PPARG_KO_MACROPHAGE_UP                  |                                  |                                  |                                  |            |
|                                                        |                                  |                                  |                                  | 146        |
| 0.26729998                                             | 1.1089054                        | 0.265625                         | 0.29564583                       | 1          |
| 2710                                                   | "tags=33%, list=19%, signal=40%" |                                  |                                  |            |
| GSE21360_PRIMARY_VS_TERTIARY_MEMORY_CD8_TCELL_DN       |                                  |                                  |                                  |            |
| GSE21360_PRIMARY_VS_TERTIARY_MEMORY_CD8_TCELL_DN       |                                  |                                  |                                  |            |
|                                                        |                                  |                                  |                                  | 148        |
| 0.26894742                                             | 1.1087075                        | 0.24404761                       |                                  | 0.2958863  |
| 1                                                      | 2469                             | "tags=32%, list=17%, signal=39%" |                                  |            |

|                                                                |                                  |                                  |                                  |            |
|----------------------------------------------------------------|----------------------------------|----------------------------------|----------------------------------|------------|
| GSE28737_FOLLICULAR_VS_MARGINAL_ZONE_BCELL_UP                  |                                  |                                  |                                  |            |
| GSE28737_FOLLICULAR_VS_MARGINAL_ZONE_BCELL_UP                  |                                  |                                  |                                  | 137        |
| 0.27065086                                                     | 1.1086624                        | 0.24042553                       | 0.29582956                       |            |
| 1                                                              | 2130                             | "tags=23%, list=15%, signal=27%" |                                  |            |
| GSE6092_IFNG_VS_IFNG_AND_B_BURGDORFERI_INF_ENDOTHELIAL_CELL_DN |                                  |                                  |                                  |            |
| GSE6092_IFNG_VS_IFNG_AND_B_BURGDORFERI_INF_ENDOTHELIAL_CELL_DN |                                  |                                  |                                  |            |
|                                                                | 142                              | 0.2713753                        | 1.1082748                        | 0.23809524 |
| 0.2964233                                                      | 1                                | 2644                             | "tags=32%, list=19%, signal=39%" |            |
| GSE12198_LOW_IL2_STIM_NK_CELL_VS_HIGH_IL2_STIM_NK_CELL_DN      |                                  |                                  |                                  |            |
| GSE12198_LOW_IL2_STIM_NK_CELL_VS_HIGH_IL2_STIM_NK_CELL_DN      |                                  |                                  |                                  |            |
| 150                                                            | 0.26683107                       | 1.10773                          | 0.2238806                        | 0.29738605 |
| 1                                                              | 2648                             | "tags=25%, list=19%, signal=31%" |                                  |            |
| GSE32901_TH17_EMRICHED_VS_TH17_NEG_CD4_TCELL_DN                |                                  |                                  |                                  |            |
| GSE32901_TH17_EMRICHED_VS_TH17_NEG_CD4_TCELL_DN                |                                  |                                  |                                  | 140        |
| 0.27018058                                                     | 1.107605                         | 0.23044397                       | 0.29749998                       | 1          |
| 2191                                                           | "tags=25%, list=16%, signal=29%" |                                  |                                  |            |
| GSE13522_CTRL_VS_T_CRUZI_G_STRAIN_INF_SKIN_DN                  |                                  |                                  |                                  |            |
| GSE13522_CTRL_VS_T_CRUZI_G_STRAIN_INF_SKIN_DN                  |                                  |                                  |                                  | 110        |
| 0.27549332                                                     | 1.1075023                        | 0.24197002                       | 0.29756412                       |            |
| 1                                                              | 2295                             | "tags=25%, list=16%, signal=30%" |                                  |            |
| GSE1460_DP_THYMOCYTE_VS_THYMIC_STROMAL_CELL_UP                 |                                  |                                  |                                  |            |
| GSE1460_DP_THYMOCYTE_VS_THYMIC_STROMAL_CELL_UP                 |                                  |                                  |                                  | 128        |
| 0.27306485                                                     | 1.1068971                        | 0.26215646                       | 0.29864016                       |            |
| 1                                                              | 2131                             | "tags=20%, list=15%, signal=24%" |                                  |            |
| GSE339_EX_VIVO_VS_IN_CULTURE_CD4CD8DN_DC_DN                    |                                  |                                  |                                  |            |
| GSE339_EX_VIVO_VS_IN_CULTURE_CD4CD8DN_DC_DN                    |                                  |                                  |                                  | 158        |
| 0.26400188                                                     | 1.1066422                        | 0.22964509                       | 0.29897973                       |            |
| 1                                                              | 2986                             | "tags=30%, list=21%, signal=38%" |                                  |            |
| GSE17974_IL4_AND_ANTI_IL12_VS_UNTREATED_4H_ACT_CD4_TCELL_UP    |                                  |                                  |                                  |            |
| GSE17974_IL4_AND_ANTI_IL12_VS_UNTREATED_4H_ACT_CD4_TCELL_UP    |                                  |                                  |                                  |            |
| 115                                                            | 0.27756375                       | 1.1063675                        | 0.25820568                       |            |
| 0.29940593                                                     | 1                                | 1577                             | "tags=19%, list=11%, signal=21%" |            |
| GSE6674_CPG_VS_PL2_3_STIM_BCELL_DN                             |                                  |                                  |                                  |            |
| GSE6674_CPG_VS_PL2_3_STIM_BCELL_DN                             |                                  |                                  |                                  | 140        |
| 0.27125233                                                     | 1.1056926                        | 0.24307036                       | 0.30062133                       |            |
| 1                                                              | 2420                             | "tags=31%, list=17%, signal=38%" |                                  |            |
| GSE21927_EL4_VS_MCA203_TUMOR_MONOCYTES_UP                      |                                  |                                  |                                  |            |
| GSE21927_EL4_VS_MCA203_TUMOR_MONOCYTES_UP                      |                                  |                                  |                                  | 117        |
| 0.2776316                                                      | 1.1055009                        | 0.2634855                        | 0.30086267                       |            |
| 1                                                              | 1538                             | "tags=17%, list=11%, signal=19%" |                                  |            |
| GSE45365_WT_VS_IFNAR_KO_BCELL_MCMV_INFECTIION_UP               |                                  |                                  |                                  |            |
| GSE45365_WT_VS_IFNAR_KO_BCELL_MCMV_INFECTIION_UP               |                                  |                                  |                                  | 95         |
| 0.28396043                                                     | 1.1049621                        | 0.23777778                       | 0.30177832                       |            |
| 1                                                              | 955                              | "tags=12%, list=7%, signal=12%"  |                                  |            |
| GSE6269_HEALTHY_VS_FLU_INF_PBMC_UP                             |                                  |                                  |                                  |            |
| GSE6269_HEALTHY_VS_FLU_INF_PBMC_UP                             |                                  |                                  |                                  | 105        |
| 0.27604306                                                     | 1.1047846                        | 0.27196652                       | 0.30201337                       |            |
| 1                                                              | 2699                             | "tags=36%, list=19%, signal=44%" |                                  |            |
| GSE15750_WT_VS_TRAF6KO_DAY6_EFF_CD8_TCELL_UP                   |                                  |                                  |                                  |            |
| GSE15750_WT_VS_TRAF6KO_DAY6_EFF_CD8_TCELL_UP                   |                                  |                                  |                                  | 138        |
| 0.27052093                                                     | 1.1047114                        | 0.24364407                       | 0.3020132                        |            |
| 1                                                              | 1977                             | "tags=22%, list=14%, signal=25%" |                                  |            |
| GSE3982_DC_VS_CENT_MEMORY_CD4_TCELL_UP                         |                                  |                                  |                                  |            |
| GSE3982_DC_VS_CENT_MEMORY_CD4_TCELL_UP                         |                                  |                                  |                                  | 159        |

|                                                        |                                   |                                  |                                  |
|--------------------------------------------------------|-----------------------------------|----------------------------------|----------------------------------|
| 0.26433745                                             | 1.1041082                         | 0.23725055                       | 0.30311894                       |
| 1                                                      | 2525                              | "tags=26%, list=18%, signal=31%" |                                  |
| GSE32423_MEMORY_VS_NAIVE_CD8_TCELL_IL7_DN              |                                   |                                  |                                  |
| GSE32423_MEMORY_VS_NAIVE_CD8_TCELL_IL7_DN              |                                   |                                  | 144                              |
| 0.26865998                                             | 1.1034893                         | 0.2400881                        | 0.30422643                       |
| 1                                                      | 1201                              | "tags=15%, list=9%, signal=17%"  |                                  |
| GSE6566_STRONG_VS_WEAK_DC_STIMULATED_CD4_TCELL_UP      |                                   |                                  |                                  |
| GSE6566_STRONG_VS_WEAK_DC_STIMULATED_CD4_TCELL_UP      |                                   |                                  | 114                              |
| 0.27785954                                             | 1.1033297                         | 0.27455357                       | 0.3044088                        |
| 1                                                      | 2579                              | "tags=25%, list=18%, signal=30%" |                                  |
| GSE29617_DAY3_VS_DAY7_TIV_FLU_VACCINE_PBMC_2008_DN     |                                   |                                  |                                  |
| GSE29617_DAY3_VS_DAY7_TIV_FLU_VACCINE_PBMC_2008_DN     |                                   |                                  | 101                              |
| 0.28333142                                             | 1.1029091                         | 0.25813448                       | 0.30516496                       |
| 1                                                      | 470                               | "tags=11%, list=3%, signal=11%"  |                                  |
| GSE3982_MAC_VS_NKCELL_UP                               | GSE3982_MAC_VS_NKCELL_UP          |                                  | 151                              |
| 0.2633421                                              | 1.1024238                         | 0.24109015                       | 0.30599555                       |
| 1                                                      | 549                               | "tags=9%, list=4%, signal=9%"    |                                  |
| GSE13484_12H_VS_3H_YF17D_VACCINE_STIM_PBMC_DN          |                                   |                                  |                                  |
| GSE13484_12H_VS_3H_YF17D_VACCINE_STIM_PBMC_DN          |                                   |                                  | 141                              |
| 0.2716213                                              | 1.1022809                         | 0.26030368                       | 0.30614498                       |
| 1                                                      | 1896                              | "tags=22%, list=13%, signal=25%" |                                  |
| GSE22886_NAIVE_CD4_TCELL_VS_NEUTROPHIL_UP              |                                   |                                  |                                  |
| GSE22886_NAIVE_CD4_TCELL_VS_NEUTROPHIL_UP              |                                   |                                  | 143                              |
| 1.1011665                                              | 0.23851204                        | 0.30823347                       | 0.266948                         |
| 2535                                                   |                                   | "tags=29%, list=18%, signal=35%" | 1                                |
| GSE2770_UNTREATED_VS_IL12_TREATED_ACT_CD4_TCELL_48H_UP |                                   |                                  |                                  |
| GSE2770_UNTREATED_VS_IL12_TREATED_ACT_CD4_TCELL_48H_UP |                                   |                                  |                                  |
| 157                                                    | 0.26671642                        | 1.1010883                        | 0.24086021                       |
| 0.3082416                                              | 1                                 | 1805                             | "tags=22%, list=13%, signal=25%" |
| GSE43955_TH0_VS_TGFB_IL6_TH17_ACT_CD4_TCELL_60H_UP     |                                   |                                  |                                  |
| GSE43955_TH0_VS_TGFB_IL6_TH17_ACT_CD4_TCELL_60H_UP     |                                   |                                  | 162                              |
| 0.26657006                                             | 1.1010618                         | 0.24307036                       | 0.30816007                       |
| 1                                                      | 2034                              | "tags=20%, list=14%, signal=23%" |                                  |
| GSE17721_LPS_VS_POLYIC_4H_BMDC_UP                      | GSE17721_LPS_VS_POLYIC_4H_BMDC_UP |                                  |                                  |
| 167                                                    | 0.25948098                        | 1.1008878                        | 0.23319328                       |
| 0.30838093                                             | 1                                 | 2253                             | "tags=22%, list=16%, signal=25%" |
| GSE36009_UNSTIM_VS_LPS_STIM_NLRP10_KO_DC_DN            |                                   |                                  |                                  |
| GSE36009_UNSTIM_VS_LPS_STIM_NLRP10_KO_DC_DN            |                                   |                                  | 142                              |
| 0.26443875                                             | 1.100808                          | 0.26195425                       | 0.30840054                       |
| 1817                                                   |                                   | "tags=23%, list=13%, signal=26%" | 1                                |
| GSE27786_ERYTHROBLAST_VS_MONO_MAC_DN                   |                                   |                                  |                                  |
| GSE27786_ERYTHROBLAST_VS_MONO_MAC_DN                   |                                   |                                  | 148                              |
| 0.25982875                                             | 1.1002859                         | 0.23168316                       | 0.30927598                       |
| 1                                                      | 1825                              | "tags=22%, list=13%, signal=25%" |                                  |
| GSE1925_CTRL_VS_24H_IFNG_STIM_MACROPHAGE_UP            |                                   |                                  |                                  |
| GSE1925_CTRL_VS_24H_IFNG_STIM_MACROPHAGE_UP            |                                   |                                  | 135                              |
| 0.27266878                                             | 1.1002336                         | 0.27108434                       | 0.3092398                        |
| 1                                                      | 1686                              | "tags=19%, list=12%, signal=22%" |                                  |
| GSE31622_WT_VS_KLF3_KO_BCELL_DN                        | GSE31622_WT_VS_KLF3_KO_BCELL_DN   |                                  |                                  |
| 143                                                    | 0.26697838                        | 1.1001133                        | 0.23443983                       |
| 0.30934083                                             | 1                                 | 2341                             | "tags=22%, list=17%, signal=27%" |
| GSE15750_WT_VS_TRAF6KO_DAY10_EFF_CD8_TCELL_UP          |                                   |                                  |                                  |
| GSE15750_WT_VS_TRAF6KO_DAY10_EFF_CD8_TCELL_UP          |                                   |                                  | 149                              |
| 0.2635008                                              | 1.09987                           | 0.23188406                       | 0.30968794                       |
|                                                        |                                   |                                  | 1                                |

1301 "tags=19%, list=9%, signal=20%"  
GSE14308\_TH2\_VS\_INDUCED\_TREG\_DN GSE14308\_TH2\_VS\_INDUCED\_TREG\_DN  
139 0.26853046 1.0998349 0.25313807  
0.30961305 1 2463 "tags=27%, list=17%, signal=32%"  
GSE2770\_TGFB\_AND\_IL4\_VS\_TGFB\_AND\_IL12\_TREATED\_ACT\_CD4\_TCELL\_6H\_UP  
GSE2770\_TGFB\_AND\_IL4\_VS\_TGFB\_AND\_IL12\_TREATED\_ACT\_CD4\_TCELL\_6H\_UP  
147 0.26179206 1.0998243 0.2275574  
0.3094959 1 1548 "tags=15%, list=11%, signal=17%"  
GSE17580\_TREG\_VS\_TEFF\_DN GSE17580\_TREG\_VS\_TEFF\_DN 151  
0.26918834 1.0996484 0.2473573 0.30970106  
1 2175 "tags=25%, list=15%, signal=29%"  
GSE20366\_CD103\_KLRG1\_DP\_VS\_DN\_TREG\_DN  
GSE20366\_CD103\_KLRG1\_DP\_VS\_DN\_TREG\_DN 134  
0.2671348 1.099545 0.25274727 0.3097691 1  
1282 "tags=19%, list=9%, signal=21%"  
GSE7460\_FOXP3\_MUT\_VS\_WT\_ACT\_WITH\_TGFB\_TCONV\_UP  
GSE7460\_FOXP3\_MUT\_VS\_WT\_ACT\_WITH\_TGFB\_TCONV\_UP 151  
0.26359478 1.0993097 0.24481328 0.3100935  
1 1795 "tags=22%, list=13%, signal=25%"  
GSE29615\_CTRL\_VS\_LAIV\_FLU\_VACCINE\_PBMC\_UP  
GSE29615\_CTRL\_VS\_LAIV\_FLU\_VACCINE\_PBMC\_UP 122  
0.2722751 1.0989357 0.25540274 0.31071955  
1 1623 "tags=18%, list=12%, signal=20%"  
GSE21360\_TERTIARY\_VS\_QUATERNARY\_MEMORY\_CD8\_TCELL\_UP  
GSE21360\_TERTIARY\_VS\_QUATERNARY\_MEMORY\_CD8\_TCELL\_UP  
152 0.26343662 1.0978888 0.25523013  
0.31269404 1 1054 "tags=14%, list=7%, signal=15%"  
GSE27786\_NKTCELL\_VS\_MONO\_MAC\_UP GSE27786\_NKTCELL\_VS\_MONO\_MAC\_UP  
139 0.26921105 1.0974754 0.25462013  
0.31343052 1 2792 "tags=37%, list=20%, signal=45%"  
GSE22886\_CD8\_VS\_CD4\_NAIVE\_TCELL\_DN  
GSE22886\_CD8\_VS\_CD4\_NAIVE\_TCELL\_DN 129  
0.26793116 1.0972093 0.26652452 0.31382594  
1 2145 "tags=22%, list=15%, signal=25%"  
GSE6259\_CD4\_TCELL\_VS\_CD8\_TCELL\_DN GSE6259\_CD4\_TCELL\_VS\_CD8\_TCELL\_DN  
140 0.2663111 1.0971485 0.24733475  
0.31379333 1 2359 "tags=24%, list=17%, signal=29%"  
GSE34006\_WT\_VS\_A2AR\_KO\_TREG\_UP GSE34006\_WT\_VS\_A2AR\_KO\_TREG\_UP  
158 0.2665835 1.0971372 0.234375  
0.3136714 1 2338 "tags=25%, list=17%, signal=30%"  
GSE5960\_TH1\_VS\_ANERGIC\_TH1\_UP GSE5960\_TH1\_VS\_ANERGIC\_TH1\_UP  
156 0.26202857 1.0963942 0.24603175  
0.3150282 1 2975 "tags=35%, list=21%, signal=44%"  
GSE26343\_UNSTIM\_VS\_LPS\_STIM\_MACROPHAGE\_DN  
GSE26343\_UNSTIM\_VS\_LPS\_STIM\_MACROPHAGE\_DN 151  
0.26555672 1.0955803 0.25054467 0.3165892  
1 1683 "tags=19%, list=12%, signal=22%"  
GSE17721\_POLYIC\_VS\_CPG\_24H\_BMDC\_UP  
GSE17721\_POLYIC\_VS\_CPG\_24H\_BMDC\_UP 151  
0.26177788 1.0934893 0.2753304 0.32077473  
1 1950 "tags=23%, list=14%, signal=26%"  
GSE37533\_UNTREATED\_VS\_PIOGLIZATONE\_TREATED\_CD4\_TCELL\_FOXP3\_TRASDUCED  
\_CD4\_TCELL\_DN  
GSE37533\_UNTREATED\_VS\_PIOGLIZATONE\_TREATED\_CD4\_TCELL\_FOXP3\_TRASDUCED



|                                                                      |            |            |                                          |
|----------------------------------------------------------------------|------------|------------|------------------------------------------|
| _CD4_TCELL_DN                                                        | 111        | 0.27627358 | 1.0933162                                |
| 0.26694915                                                           | 0.3209926  | 1          | 2327 "tags=23%,<br>list=16%, signal=28%" |
| GSE37301_COMMON_LYMPHOID_PROGENITOR_VS_RAG2_KO_NK_CELL_UP            |            |            |                                          |
| GSE37301_COMMON_LYMPHOID_PROGENITOR_VS_RAG2_KO_NK_CELL_UP            |            |            |                                          |
| 142                                                                  | 0.2623924  | 1.0924032  | 0.2290749                                |
| 0.32275632                                                           | 1          | 1662       | "tags=16%, list=12%, signal=18%"         |
| GSE17721_LPS_VS_CPG_2H_BMDC_UP                                       |            |            |                                          |
| GSE17721_LPS_VS_CPG_2H_BMDC_UP                                       |            |            |                                          |
| 156                                                                  | 0.2589079  | 1.0922083  | 0.2734694                                |
| 0.32300943                                                           | 1          | 1726       | "tags=18%, list=12%, signal=20%"         |
| GSE17721_CTRL_VS_PAM3CSK4_0.5H_BMDC_DN                               |            |            |                                          |
| GSE17721_CTRL_VS_PAM3CSK4_0.5H_BMDC_DN                               |            |            |                                          |
| 0.25952414                                                           | 1.0921612  | 0.24946696 | 0.3229626                                |
| 1                                                                    | 1171       |            | "tags=12%, list=8%, signal=13%"          |
| GSE19888_CTRL_VS_A3R_ACT_TREATED_MAST_CELL_PRETREATED_WITH_A3R_INH_D |            |            |                                          |
| GSE19888_CTRL_VS_A3R_ACT_TREATED_MAST_CELL_PRETREATED_WITH_A3R_INH_D |            |            |                                          |
| 150                                                                  | 0.2634072  | 1.0916283  |                                          |
| 0.24944812                                                           | 0.32386854 | 1          | 834 "tags=11%,<br>list=6%, signal=12%"   |
| GSE3982_MEMORY_CD4_TCELL_VS_BCELL_DN                                 |            |            |                                          |
| GSE3982_MEMORY_CD4_TCELL_VS_BCELL_DN                                 |            |            |                                          |
| 0.26462945                                                           | 1.0915972  | 0.24554455 | 0.3237833                                |
| 1                                                                    | 2232       |            | "tags=25%, list=16%, signal=29%"         |
| GSE41176_WT_VS_TAK1_KO_ANTI_IGM_STIM_BCELL_6H_DN                     |            |            |                                          |
| GSE41176_WT_VS_TAK1_KO_ANTI_IGM_STIM_BCELL_6H_DN                     |            |            |                                          |
| 0.26073137                                                           | 1.0915415  | 0.25475284 | 0.32374012                               |
| 1                                                                    | 2442       |            | "tags=29%, list=17%, signal=35%"         |
| GSE21063_3H_VS_16H_ANTI_IGM_STIM_NFATC1_KOBCELL_UP                   |            |            |                                          |
| GSE21063_3H_VS_16H_ANTI_IGM_STIM_NFATC1_KOBCELL_UP                   |            |            |                                          |
| 0.26331398                                                           | 1.0911008  | 0.2699029  | 0.32451257                               |
| 1                                                                    | 2003       |            | "tags=22%, list=14%, signal=26%"         |
| GSE22886_NAIVE_CD4_TCELL_VS_12H_ACT_TH1_UP                           |            |            |                                          |
| GSE22886_NAIVE_CD4_TCELL_VS_12H_ACT_TH1_UP                           |            |            |                                          |
| 0.2679285                                                            | 1.0910946  | 0.25894737 | 0.32438222                               |
| 1                                                                    | 1788       |            | "tags=19%, list=13%, signal=22%"         |
| GSE15659_CD45RA_NEG_CD4_TCELL_VS_RESTING_TREG_UP                     |            |            |                                          |
| GSE15659_CD45RA_NEG_CD4_TCELL_VS_RESTING_TREG_UP                     |            |            |                                          |
| 0.2709425                                                            | 1.0910826  | 0.29957807 | 0.32426304                               |
| 1                                                                    | 2543       |            | "tags=24%, list=18%, signal=29%"         |
| GSE17721_PAM3CSK4_VS_GADIQUIMOD_8H_BMDC_DN                           |            |            |                                          |
| GSE17721_PAM3CSK4_VS_GADIQUIMOD_8H_BMDC_DN                           |            |            |                                          |
| 0.2647925                                                            | 1.0910609  | 0.25979382 | 0.3241574                                |
| 1                                                                    | 1251       |            | "tags=15%, list=9%, signal=17%"          |
| GSE37416_12H_VS_48H_F_TULARENSIS_LVS_NEUTROPHIL_DN                   |            |            |                                          |
| GSE37416_12H_VS_48H_F_TULARENSIS_LVS_NEUTROPHIL_DN                   |            |            |                                          |
| 0.27406508                                                           | 1.0907872  | 0.27272728 | 0.32461                                  |
| 1685                                                                 |            |            | "tags=21%, list=12%, signal=23%"         |
| GSE42021_CD24INT_VS_CD24LOW_TREG_THYMUS_UP                           |            |            |                                          |
| GSE42021_CD24INT_VS_CD24LOW_TREG_THYMUS_UP                           |            |            |                                          |
| 0.27050573                                                           | 1.0907857  | 0.28902954 | 0.32446608                               |
| 1                                                                    | 1809       |            | "tags=19%, list=13%, signal=21%"         |
| GSE46606_DAY1_VS_DAY3_CD40L_IL2_IL5_STIMULATED_IRF4HIGH_BCELL_DN     |            |            |                                          |
| GSE46606_DAY1_VS_DAY3_CD40L_IL2_IL5_STIMULATED_IRF4HIGH_BCELL_DN     |            |            |                                          |

|                                                                          |            |                                  |                                  |                                  |
|--------------------------------------------------------------------------|------------|----------------------------------|----------------------------------|----------------------------------|
|                                                                          | 137        | 0.26507363                       | 1.0900663                        | 0.27364185                       |
| 0.32584223                                                               | 1          | 2520                             | "tags=31%, list=18%, signal=37%" |                                  |
| GSE28737_WT_VS_BCL6_HET_FOLLICULAR_BCELL_DN                              |            |                                  |                                  |                                  |
| GSE28737_WT_VS_BCL6_HET_FOLLICULAR_BCELL_DN                              |            |                                  |                                  | 140                              |
| 0.26398033                                                               | 1.0899172  | 0.23858921                       | 0.32602412                       |                                  |
| 1                                                                        | 2142       | "tags=23%, list=15%, signal=27%" |                                  |                                  |
| GSE26488_WT_VS_HDAC7_KO_DOUBLE_POSITIVE_THYMOCYTE_DN                     |            |                                  |                                  |                                  |
| GSE26488_WT_VS_HDAC7_KO_DOUBLE_POSITIVE_THYMOCYTE_DN                     |            |                                  |                                  |                                  |
| 126                                                                      | 0.268746   | 1.0893657                        | 0.26565874                       | 0.3270404                        |
| 1                                                                        | 2521       | "tags=29%, list=18%, signal=35%" |                                  |                                  |
| GSE46606_UNSTIM_VS_CD40L_IL2_IL5_3DAY_STIMULATED_IRF4MID_SORTED_BCELL_UP |            |                                  |                                  |                                  |
| GSE46606_UNSTIM_VS_CD40L_IL2_IL5_3DAY_STIMULATED_IRF4MID_SORTED_BCELL_UP | 146        | 0.26271683                       | 1.0889076                        |                                  |
| 0.30470347                                                               | 0.3278445  | 1                                | 2655                             | "tags=34%, list=19%, signal=41%" |
| GSE41867_DAY8_EFFECTOR_VS_DAY30_EXHAUSTED_CD8_TCELL_LCMV_CLONE13_DN      |            |                                  |                                  |                                  |
| GSE41867_DAY8_EFFECTOR_VS_DAY30_EXHAUSTED_CD8_TCELL_LCMV_CLONE13_DN      |            |                                  |                                  |                                  |
|                                                                          | 152        | 0.26165277                       | 1.0887755                        | 0.26947367                       |
| 0.32796207                                                               | 1          | 2565                             | "tags=30%, list=18%, signal=37%" |                                  |
| GSE32986_UNSTIM_VS_GMCSF_STIM_DC_DN                                      |            |                                  |                                  |                                  |
| GSE32986_UNSTIM_VS_GMCSF_STIM_DC_DN                                      |            |                                  |                                  | 134                              |
| 0.26306704                                                               | 1.0886229  | 0.27542374                       | 0.3281385                        |                                  |
| 1                                                                        | 2668       | "tags=29%, list=19%, signal=36%" |                                  |                                  |
| GSE40274_CTRL_VS_LEF1_TRANSDUCE_ACTIVATED_CD4_TCELL_DN                   |            |                                  |                                  |                                  |
| GSE40274_CTRL_VS_LEF1_TRANSDUCE_ACTIVATED_CD4_TCELL_DN                   |            |                                  |                                  |                                  |
| 133                                                                      | 0.27083677 | 1.0885977                        | 0.28658536                       |                                  |
| 0.32805198                                                               | 1          | 1612                             | "tags=19%, list=11%, signal=21%" |                                  |
| GSE10463_CD40L_AND_VA347_VS_CD40L_IN_DC_UP                               |            |                                  |                                  |                                  |
| GSE10463_CD40L_AND_VA347_VS_CD40L_IN_DC_UP                               |            |                                  |                                  | 115                              |
| 0.27107525                                                               | 1.0885061  | 0.2811245                        | 0.32810104                       |                                  |
| 1                                                                        | 1913       | "tags=18%, list=14%, signal=21%" |                                  |                                  |
| GSE32986_UNSTIM_VS_CURDLAN_HIGHDOSE_STIM_DC_DN                           |            |                                  |                                  |                                  |
| GSE32986_UNSTIM_VS_CURDLAN_HIGHDOSE_STIM_DC_DN                           |            |                                  |                                  | 126                              |
| 0.26973274                                                               | 1.0884197  | 0.27991885                       | 0.32812324                       |                                  |
| 1                                                                        | 1891       | "tags=20%, list=13%, signal=23%" |                                  |                                  |
| GSE27786_LIN_NEG_VS_MONO_MAC_DN                                          |            |                                  |                                  |                                  |
| GSE27786_LIN_NEG_VS_MONO_MAC_DN                                          |            |                                  |                                  |                                  |
|                                                                          | 149        | 0.2637573                        | 1.0882334                        | 0.28542915                       |
| 0.3283775                                                                | 1          | 2837                             | "tags=30%, list=20%, signal=37%" |                                  |
| GSE360_CTRL_VS_M_TUBERCULOSIS_DC_DN                                      |            |                                  |                                  |                                  |
| GSE360_CTRL_VS_M_TUBERCULOSIS_DC_DN                                      |            |                                  |                                  | 152                              |
| 0.2597405                                                                | 1.0879109  | 0.24740125                       | 0.32890302                       |                                  |
| 1                                                                        | 2010       | "tags=24%, list=14%, signal=28%" |                                  |                                  |
| GSE16385_MONOCYTE_VS_12H_ROSIGLITAZONE_IL4_TREATED_MACROPHAGE_UP         |            |                                  |                                  |                                  |
| GSE16385_MONOCYTE_VS_12H_ROSIGLITAZONE_IL4_TREATED_MACROPHAGE_UP         |            |                                  |                                  |                                  |
|                                                                          | 140        | 0.2645882                        | 1.0878592                        | 0.25431034                       |
| 0.32886857                                                               | 1          | 2468                             | "tags=28%, list=17%, signal=33%" |                                  |
| GSE22886_NAIVE_CD4_TCELL_VS_NKCELL_UP                                    |            |                                  |                                  |                                  |
| GSE22886_NAIVE_CD4_TCELL_VS_NKCELL_UP                                    |            |                                  |                                  | 140                              |
| 0.26337084                                                               | 1.0878422  | 0.28270042                       | 0.32876045                       |                                  |
| 1                                                                        | 1484       | "tags=18%, list=11%, signal=20%" |                                  |                                  |
| GSE21927_SPLEEN_VS_TUMOR_MONOCYTE_BALBC_UP                               |            |                                  |                                  |                                  |
| GSE21927_SPLEEN_VS_TUMOR_MONOCYTE_BALBC_UP                               |            |                                  |                                  | 101                              |
| 0.27338788                                                               | 1.0874687  | 0.27623126                       | 0.32940516                       |                                  |

1 1159 "tags=14%, list=8%, signal=15%"  
GSE3982\_DC\_VS\_BASOPHIL\_UP GSE3982\_DC\_VS\_BASOPHIL\_UP 148  
0.26544318 1.0862849 0.26349893 0.33180073  
1 2121 "tags=24%, list=15%, signal=28%"  
GSE45365\_CD8A\_DC\_VS\_CD11B\_DC\_DN GSE45365\_CD8A\_DC\_VS\_CD11B\_DC\_DN  
125 0.26835567 1.0857424 0.28817204  
0.33280495 1 2513 "tags=27%, list=18%, signal=33%"  
GSE2770\_TGFB\_AND\_IL4\_VS\_IL4\_TREATED\_ACT\_CD4\_TCELL\_48H\_UP  
GSE2770\_TGFB\_AND\_IL4\_VS\_IL4\_TREATED\_ACT\_CD4\_TCELL\_48H\_UP  
143 0.2589523 1.0855951 0.25465837 0.332947  
1 2223 "tags=27%, list=16%, signal=32%"  
GSE34156\_TLR1\_TLR2\_LIGAND\_VS\_NOD2\_AND\_TLR1\_TLR2\_LIGAND\_24H\_TREATED\_M  
ONOCYTE\_UP  
GSE34156\_TLR1\_TLR2\_LIGAND\_VS\_NOD2\_AND\_TLR1\_TLR2\_LIGAND\_24H\_TREATED\_M  
ONOCYTE\_UP 140 0.26503938 1.0855722  
0.2611336 0.33285987 1 1307 "tags=17%,  
list=9%, signal=19%"  
GSE45365\_NK\_CELL\_VS\_CD8A\_DC\_MCMV\_INFECTION\_DN  
GSE45365\_NK\_CELL\_VS\_CD8A\_DC\_MCMV\_INFECTION\_DN 134  
0.26343736 1.0843167 0.25150904 0.33546287  
1 1490 "tags=16%, list=11%, signal=18%"  
GSE15659\_CD45RA\_NEG\_CD4\_TCELL\_VS\_NONSUPPRESSIVE\_TCELL\_DN  
GSE15659\_CD45RA\_NEG\_CD4\_TCELL\_VS\_NONSUPPRESSIVE\_TCELL\_DN  
139 0.26851383 1.0843165 0.27982646  
0.33531275 1 2091 "tags=20%, list=15%, signal=23%"  
GSE33424\_CD161\_INT\_VS\_NEG\_CD8\_TCELL\_DN  
GSE33424\_CD161\_INT\_VS\_NEG\_CD8\_TCELL\_DN 148  
0.2595392 1.084296 0.24631579 0.33520707 1  
2612 "tags=31%, list=19%, signal=38%"  
GSE5589\_IL6\_KO\_VS\_IL10\_KO\_LPS\_STIM\_MACROPHAGE\_45MIN\_UP  
GSE5589\_IL6\_KO\_VS\_IL10\_KO\_LPS\_STIM\_MACROPHAGE\_45MIN\_UP  
136 0.26417893 1.0841984 0.29723993  
0.3352607 1 2119 "tags=21%, list=15%, signal=25%"  
GSE16450\_IMMATURE\_VS\_MATURE\_NEURON\_CELL\_LINE\_6H\_IFNA\_STIM\_DN  
GSE16450\_IMMATURE\_VS\_MATURE\_NEURON\_CELL\_LINE\_6H\_IFNA\_STIM\_DN  
148 0.2622647 1.0835521 0.2733051  
0.3364635 1 2429 "tags=24%, list=17%, signal=28%"  
GSE28737\_BCL6\_HET\_VS\_BCL6\_KO\_FOLLICULAR\_BCELL\_DN  
GSE28737\_BCL6\_HET\_VS\_BCL6\_KO\_FOLLICULAR\_BCELL\_DN 154  
0.25820503 1.0833515 0.26361656 0.33675563  
1 1546 "tags=16%, list=11%, signal=18%"  
GSE20715\_0H\_VS\_24H\_OZONE\_LUNG\_UP GSE20715\_0H\_VS\_24H\_OZONE\_LUNG\_UP  
162 0.25816143 1.0832988 0.28309572  
0.33671737 1 1825 "tags=22%, list=13%, signal=25%"  
GSE10325\_LUPUS\_CD4\_TCELL\_VS\_LUPUS\_MYELOID\_UP  
GSE10325\_LUPUS\_CD4\_TCELL\_VS\_LUPUS\_MYELOID\_UP 146  
0.25975505 1.083195 0.23732251 0.33678228 1  
2055 "tags=26%, list=15%, signal=30%"  
GSE19401\_PAM2CSK4\_VS\_RETINOIC\_ACID\_AND\_PAM2CSK4\_STIM\_FOLLICULAR\_DC\_U  
P  
GSE19401\_PAM2CSK4\_VS\_RETINOIC\_ACID\_AND\_PAM2CSK4\_STIM\_FOLLICULAR\_DC\_U  
P 136 0.26598817 1.0830979  
0.2829787 0.33683592 1 2053 "tags=20%,  
list=15%, signal=23%"

GSE9960\_HEALTHY\_VS\_GRAM\_NEG\_SEPSIS\_PBMC\_DN  
GSE9960\_HEALTHY\_VS\_GRAM\_NEG\_SEPSIS\_PBMC\_DN 152  
0.2633134 1.0829307 0.28015563 0.33704254  
1 2452 "tags=28%, list=17%, signal=34%"  
GSE24210\_IL35\_TREATED\_VS\_UNTREATED\_TCONV\_CD4\_TCELL\_UP  
GSE24210\_IL35\_TREATED\_VS\_UNTREATED\_TCONV\_CD4\_TCELL\_UP  
147 0.26216602 1.0826395 0.25760648  
0.33751792 1 2373 "tags=28%, list=17%, signal=33%"  
GSE21927\_SPLENIC\_C26GM\_TUMOROUS\_VS\_BONE\_MARROW\_MONOCYTES\_DN  
GSE21927\_SPLENIC\_C26GM\_TUMOROUS\_VS\_BONE\_MARROW\_MONOCYTES\_DN  
109 0.2737245 1.0825553 0.28752643  
0.33755863 1 2064 "tags=23%, list=15%, signal=27%"  
GSE46606\_DAY1\_VS\_DAY3\_CD40L\_IL2\_IL5\_STIMULATED\_IRF4\_KO\_BCELL\_DN  
GSE46606\_DAY1\_VS\_DAY3\_CD40L\_IL2\_IL5\_STIMULATED\_IRF4\_KO\_BCELL\_DN  
138 0.2630813 1.0819741 0.2850679  
0.3386657 1 1707 "tags=18%, list=12%, signal=20%"  
GSE17721\_CPG\_VS\_GARDIQUIMOD\_16H\_BMDC\_DN  
GSE17721\_CPG\_VS\_GARDIQUIMOD\_16H\_BMDC\_DN 149  
0.2628957 1.0818584 0.29690722 0.33877894  
1 2246 "tags=26%, list=16%, signal=30%"  
GSE36476\_YOUNG\_VS\_OLD\_DONOR\_MEMORY\_CD4\_TCELL\_40H\_TSST\_ACT\_DN  
GSE36476\_YOUNG\_VS\_OLD\_DONOR\_MEMORY\_CD4\_TCELL\_40H\_TSST\_ACT\_DN  
140 0.26323926 1.0810772 0.28247422  
0.34029266 1 2479 "tags=29%, list=18%, signal=34%"  
GSE43955\_TH0\_VS\_TGFB\_IL6\_TH17\_ACT\_CD4\_TCELL\_10H\_UP  
GSE43955\_TH0\_VS\_TGFB\_IL6\_TH17\_ACT\_CD4\_TCELL\_10H\_UP 167  
0.25767353 1.0799537 0.27272728 0.3426112  
1 2001 "tags=23%, list=14%, signal=26%"  
GSE6269\_HEALTHY\_VS\_STAPH\_PNEUMO\_INF\_PBMC\_DN  
GSE6269\_HEALTHY\_VS\_STAPH\_PNEUMO\_INF\_PBMC\_DN 123  
0.272062 1.0798521 0.29227558 0.34267038 1  
1966 "tags=28%, list=14%, signal=33%"  
GSE17721\_LPS\_VS\_PAM3CSK4\_4H\_BMDC\_UP  
GSE17721\_LPS\_VS\_PAM3CSK4\_4H\_BMDC\_UP 158  
0.25966212 1.0797079 0.26751593 0.3428248  
1 2660 "tags=30%, list=19%, signal=36%"  
GSE43863\_TFH\_VS\_LY6C\_INT\_CXCR5POS\_MEMORY\_CD4\_TCELL\_DN  
GSE43863\_TFH\_VS\_LY6C\_INT\_CXCR5POS\_MEMORY\_CD4\_TCELL\_DN  
138 0.26264083 1.0793535 0.28599605  
0.34342393 1 2177 "tags=19%, list=15%, signal=22%"  
GSE17721\_LPS\_VS\_PAM3CSK4\_24H\_BMDC\_UP  
GSE17721\_LPS\_VS\_PAM3CSK4\_24H\_BMDC\_UP 148  
0.26130572 1.0792983 0.2780269 0.34338847  
1 2543 "tags=32%, list=18%, signal=39%"  
GSE17721\_PAM3CSK4\_VS\_CPG\_4H\_BMDC\_UP  
GSE17721\_PAM3CSK4\_VS\_CPG\_4H\_BMDC\_UP 127  
0.26658693 1.0790445 0.278481 0.34377742 1  
1681 "tags=20%, list=12%, signal=23%"  
GSE25087\_TREG\_VS\_TCONV\_FETUS\_UP GSE25087\_TREG\_VS\_TCONV\_FETUS\_UP  
139 0.26046637 1.0789019 0.29310346  
0.34392688 1 2742 "tags=32%, list=19%, signal=39%"  
GSE7548\_NAIVE\_VS\_DAY7\_PCC\_IMMUNIZATION\_CD4\_TCELL\_UP  
GSE7548\_NAIVE\_VS\_DAY7\_PCC\_IMMUNIZATION\_CD4\_TCELL\_UP  
151 0.26172003 1.078564 0.2647059 0.34450424

1 1985 "tags=24%, list=14%, signal=27%"  
GSE3982\_DC\_VS\_MAC\_LPS\_STIM\_DN GSE3982\_DC\_VS\_MAC\_LPS\_STIM\_DN  
146 0.26213443 1.0781345 0.26963907  
0.34531 1 1674 "tags=19%, list=12%, signal=22%"  
GSE23308\_WT\_VS\_MINERALCORTICOID\_REC\_KO\_MACROPHAGE\_DN  
GSE23308\_WT\_VS\_MINERALCORTICOID\_REC\_KO\_MACROPHAGE\_DN  
164 0.25617543 1.0772196 0.27004218  
0.34713444 1 2249 "tags=22%, list=16%, signal=26%"  
GSE9316\_CD4\_TCELL\_BALBC\_VS\_TH17\_ENRI\_CD4\_TCELL\_SKG\_PMA\_IONO\_STIM\_FR4  
NEG\_UP  
GSE9316\_CD4\_TCELL\_BALBC\_VS\_TH17\_ENRI\_CD4\_TCELL\_SKG\_PMA\_IONO\_STIM\_FR4  
NEG\_UP 153 0.2581695 1.0751592  
0.29148936 0.35146317 1 2188 "tags=21%,  
list=16%, signal=24%"  
GSE1460\_CD4\_THYMOCYTE\_VS\_NAIVE\_CD4\_TCELL\_ADULT\_BLOOD\_DN  
GSE1460\_CD4\_THYMOCYTE\_VS\_NAIVE\_CD4\_TCELL\_ADULT\_BLOOD\_DN  
131 0.26862752 1.075116 0.29399142 0.35139722  
1 2415 "tags=27%, list=17%, signal=33%"  
GSE2826\_WT\_VS\_BTK\_KO\_BCELL\_UP GSE2826\_WT\_VS\_BTK\_KO\_BCELL\_UP  
155 0.2608207 1.0750626 0.2742268  
0.35136065 1 2118 "tags=26%, list=15%, signal=30%"  
GSE6875\_WT\_VS\_FOXP3\_KO\_TREG\_UP GSE6875\_WT\_VS\_FOXP3\_KO\_TREG\_UP  
139 0.25990117 1.0743332 0.29130435  
0.352765 1 2539 "tags=29%, list=18%, signal=36%"  
GSE2585\_THYMIC\_DC\_VS\_MTEC\_DN GSE2585\_THYMIC\_DC\_VS\_MTEC\_DN  
146 0.2584341 1.073847 0.2915811  
0.3536526 1 1733 "tags=19%, list=12%, signal=22%"  
GSE40274\_CTRL\_VS\_HELIOS\_TRANSDUCED\_ACTIVATED\_CD4\_TCELL\_UP  
GSE40274\_CTRL\_VS\_HELIOS\_TRANSDUCED\_ACTIVATED\_CD4\_TCELL\_UP  
128 0.26539 1.0737898 0.29805616 0.35362333  
1 2361 "tags=28%, list=17%, signal=33%"  
GSE32255\_WT\_VS\_JMJD2D\_KNOCKDOWN\_4H\_LPS\_STIM\_DC\_DN  
GSE32255\_WT\_VS\_JMJD2D\_KNOCKDOWN\_4H\_LPS\_STIM\_DC\_DN 103  
0.2653129 1.0734526 0.31612903 0.3542188  
1 1935 "tags=22%, list=14%, signal=26%"  
GSE13411\_NAIVE\_VS\_MEMORY\_BCELL\_UP GSE13411\_NAIVE\_VS\_MEMORY\_BCELL\_UP  
117 0.26931626 1.0730457 0.3014862  
0.35492128 1 1280 "tags=14%, list=9%, signal=15%"  
GSE36009\_WT\_VS\_NLRP10\_KO\_DC\_DN GSE36009\_WT\_VS\_NLRP10\_KO\_DC\_DN  
146 0.25852236 1.0724459 0.2930328  
0.35612115 1 2174 "tags=25%, list=15%, signal=29%"  
GSE17721\_POLYIC\_VS\_CPG\_8H\_BMDC\_UP GSE17721\_POLYIC\_VS\_CPG\_8H\_BMDC\_UP  
148 0.25679436 1.0722065 0.2936345  
0.35647798 1 1894 "tags=17%, list=13%, signal=19%"  
GSE28737\_WT\_VS\_BCL6\_KO\_MARGINAL\_ZONE\_BCELL\_DN  
GSE28737\_WT\_VS\_BCL6\_KO\_MARGINAL\_ZONE\_BCELL\_DN 125  
0.26561537 1.0717746 0.29885057 0.3573195  
1 2632 "tags=30%, list=19%, signal=36%"  
GSE17721\_CTRL\_VS\_PAM3CSK4\_12H\_BMDC\_DN  
GSE17721\_CTRL\_VS\_PAM3CSK4\_12H\_BMDC\_DN 158  
0.25463906 1.0708482 0.2811159 0.3592039  
1 1589 "tags=19%, list=11%, signal=21%"  
GSE25088\_CTRL\_VS\_IL4\_AND\_ROSIGLITAZONE\_STIM\_STAT6\_KO\_MACROPHAGE\_DN  
GSE25088\_CTRL\_VS\_IL4\_AND\_ROSIGLITAZONE\_STIM\_STAT6\_KO\_MACROPHAGE\_DN

|                                                                  |                                  |                                  |                                  |     |
|------------------------------------------------------------------|----------------------------------|----------------------------------|----------------------------------|-----|
| 121                                                              | 0.26527902                       | 1.0706944                        | 0.31673306                       |     |
| 0.35937932                                                       | 1                                | 366                              | "tags=8%, list=3%, signal=8%"    |     |
| GSE3982_CTRL_VS_LPS_4H_MAC_UP                                    |                                  |                                  | GSE3982_CTRL_VS_LPS_4H_MAC_UP    |     |
| 135                                                              | 0.2615336                        | 1.0692327                        | 0.32489452                       |     |
| 0.36253485                                                       | 1                                | 2037                             | "tags=21%, list=14%, signal=25%" |     |
| GSE42088_UNINF_VS_LEISHMANIA_INF_DC_2H_UP                        |                                  |                                  |                                  |     |
| GSE42088_UNINF_VS_LEISHMANIA_INF_DC_2H_UP                        |                                  |                                  |                                  | 151 |
| 0.2562685                                                        | 1.0689616                        | 0.30620986                       | 0.36295378                       |     |
| 1                                                                | 2424                             | "tags=30%, list=17%, signal=36%" |                                  |     |
| GSE29618_LAIV_VS_TIV_FLU_VACCINE_DAY7_BCELL_DN                   |                                  |                                  |                                  |     |
| GSE29618_LAIV_VS_TIV_FLU_VACCINE_DAY7_BCELL_DN                   |                                  |                                  |                                  | 140 |
| 0.26000512                                                       | 1.0689201                        | 0.29795918                       | 0.362882                         | 1   |
| 2455                                                             | "tags=28%, list=17%, signal=33%" |                                  |                                  |     |
| GSE17721_LPS_VS_CPG_2H_BMDC_DN                                   |                                  | GSE17721_LPS_VS_CPG_2H_BMDC_DN   |                                  |     |
| 149                                                              | 0.25597677                       | 1.0676758                        | 0.30590716                       |     |
| 0.36550906                                                       | 1                                | 1363                             | "tags=14%, list=10%, signal=15%" |     |
| GSE36392_TYPE_2_MYELOID_VS_EOSINOPHIL_IL25_TREATED_LUNG_UP       |                                  |                                  |                                  |     |
| GSE36392_TYPE_2_MYELOID_VS_EOSINOPHIL_IL25_TREATED_LUNG_UP       |                                  |                                  |                                  |     |
| 138                                                              | 0.26107523                       | 1.0674447                        | 0.2965235                        |     |
| 0.36585754                                                       | 1                                | 2056                             | "tags=24%, list=15%, signal=28%" |     |
| GSE37301_MULTIPOTENT_PROGENITOR_VS_COMMON_LYMPHOID_PROGENITOR_UP |                                  |                                  |                                  |     |
| GSE37301_MULTIPOTENT_PROGENITOR_VS_COMMON_LYMPHOID_PROGENITOR_UP |                                  |                                  |                                  |     |
| 136                                                              | 0.26104254                       | 1.0664724                        | 0.29273504                       |     |
| 0.36791676                                                       | 1                                | 2373                             | "tags=31%, list=17%, signal=37%" |     |
| GSE15330_HSC_VS_GRANULOCYTE_MONOCYTE_PROGENITOR_UP               |                                  |                                  |                                  |     |
| GSE15330_HSC_VS_GRANULOCYTE_MONOCYTE_PROGENITOR_UP               |                                  |                                  |                                  | 146 |
| 0.25737077                                                       | 1.0633792                        | 0.30625                          | 0.3749298                        | 1   |
| 2135                                                             | "tags=24%, list=15%, signal=28%" |                                  |                                  |     |
| GSE28726_NAIVE_VS_ACTIVATED_NKTCELL_UP                           |                                  |                                  |                                  |     |
| GSE28726_NAIVE_VS_ACTIVATED_NKTCELL_UP                           |                                  |                                  |                                  | 140 |
| 0.25828028                                                       | 1.0633575                        | 0.31453362                       | 0.37481344                       |     |
| 1                                                                | 2205                             | "tags=21%, list=16%, signal=25%" |                                  |     |
| GSE22501_PERIPHERAL_BLOOD_VS_CORD_BLOOD_TREG_DN                  |                                  |                                  |                                  |     |
| GSE22501_PERIPHERAL_BLOOD_VS_CORD_BLOOD_TREG_DN                  |                                  |                                  |                                  | 150 |
| 0.25789326                                                       | 1.063301                         | 0.29614604                       | 0.3747793                        | 1   |
| 1169                                                             | "tags=11%, list=8%, signal=12%"  |                                  |                                  |     |
| GSE27786_BCELL_VS_NKTCELL_DN                                     |                                  | GSE27786_BCELL_VS_NKTCELL_DN     |                                  |     |
| 145                                                              | 0.25446713                       | 1.0630406                        | 0.30463576                       |     |
| 0.37523165                                                       | 1                                | 1778                             | "tags=21%, list=13%, signal=24%" |     |
| GSE17721_PAM3CSK4_VS_GADIQUIMOD_4H_BMDC_DN                       |                                  |                                  |                                  |     |
| GSE17721_PAM3CSK4_VS_GADIQUIMOD_4H_BMDC_DN                       |                                  |                                  |                                  | 157 |
| 0.25538158                                                       | 1.0629789                        | 0.29012346                       | 0.37520128                       |     |
| 1                                                                | 2831                             | "tags=33%, list=20%, signal=41%" |                                  |     |
| GSE5503_LIVER_DC_VS_MLN_DC_ACTIVATED_ALLOGENIC_TCELL_DN          |                                  |                                  |                                  |     |
| GSE5503_LIVER_DC_VS_MLN_DC_ACTIVATED_ALLOGENIC_TCELL_DN          |                                  |                                  |                                  |     |
| 145                                                              | 0.2563021                        | 1.0622535                        | 0.30952382                       |     |
| 0.37671635                                                       | 1                                | 2647                             | "tags=30%, list=19%, signal=37%" |     |
| GSE29164_DAY3_VS_DAY7_CD8_TCELL_AND_IL12_TREATED_MELANOMA_DN     |                                  |                                  |                                  |     |
| GSE29164_DAY3_VS_DAY7_CD8_TCELL_AND_IL12_TREATED_MELANOMA_DN     |                                  |                                  |                                  |     |
| 150                                                              | 0.2568252                        | 1.0619344                        | 0.3340122                        |     |
| 0.3772934                                                        | 1                                | 1552                             | "tags=16%, list=11%, signal=18%" |     |
| GSE30153_LUPUS_VS_HEALTHY_DONOR_BCELL_DN                         |                                  |                                  |                                  |     |
| GSE30153_LUPUS_VS_HEALTHY_DONOR_BCELL_DN                         |                                  |                                  |                                  | 140 |
| 0.2623981                                                        | 1.0617594                        | 0.3031579                        | 0.3775229                        |     |

1 1433 "tags=12%, list=10%, signal=13%"  
GSE21927\_SPLENIC\_C26GM\_TUMOROUS\_VS\_4T1\_TUMOR\_MONOCYTES\_DN  
GSE21927\_SPLENIC\_C26GM\_TUMOROUS\_VS\_4T1\_TUMOR\_MONOCYTES\_DN  
118 0.26661032 1.0616797 0.32264957  
0.37752712 1 1706 "tags=23%, list=12%, signal=26%"  
GSE43956\_WT\_VS\_SGK1\_KO\_TH17\_DIFFERENTIATED\_CD4\_TCELL\_UP  
GSE43956\_WT\_VS\_SGK1\_KO\_TH17\_DIFFERENTIATED\_CD4\_TCELL\_UP  
155 0.25392276 1.0615014 0.30387932  
0.37778035 1 2702 "tags=23%, list=19%, signal=28%"  
GSE42088\_UNINF\_VS\_LEISHMANIA\_INF\_DC\_24H\_DN  
GSE42088\_UNINF\_VS\_LEISHMANIA\_INF\_DC\_24H\_DN 162  
0.25168207 1.0611461 0.32692307 0.37844738  
1 2469 "tags=28%, list=17%, signal=33%"  
GSE29618\_PRE\_VS\_DAY7\_FLU\_VACCINE\_BCELL\_DN  
GSE29618\_PRE\_VS\_DAY7\_FLU\_VACCINE\_BCELL\_DN 136  
0.2553851 1.0602461 0.2905983 0.38030028  
1 2205 "tags=25%, list=16%, signal=29%"  
GSE10094\_LCMV\_VS\_LISTERIA\_IND\_EFF\_CD4\_TCELL\_UP  
GSE10094\_LCMV\_VS\_LISTERIA\_IND\_EFF\_CD4\_TCELL\_UP 133  
0.26071036 1.0602317 0.3139785 0.38016593  
1 1969 "tags=26%, list=14%, signal=29%"  
GSE2770\_IL4\_ACT\_VS\_ACT\_CD4\_TCELL\_48H\_DN  
GSE2770\_IL4\_ACT\_VS\_ACT\_CD4\_TCELL\_48H\_DN 139  
0.25719854 1.0602026 0.31625834 0.38007227  
1 1583 "tags=14%, list=11%, signal=15%"  
GSE20727\_CTRL\_VS\_ROS\_INH\_AND\_DNFB\_ALLERGEN\_TREATED\_DC\_UP  
GSE20727\_CTRL\_VS\_ROS\_INH\_AND\_DNFB\_ALLERGEN\_TREATED\_DC\_UP  
137 0.2593841 1.0597967 0.29979035  
0.38081494 1 1938 "tags=23%, list=14%, signal=27%"  
GSE46025\_WT\_VS\_FOXO1\_KO\_KLRG1\_LOW\_CD8\_EFFECTOR\_TCELL\_DN  
GSE46025\_WT\_VS\_FOXO1\_KO\_KLRG1\_LOW\_CD8\_EFFECTOR\_TCELL\_DN  
119 0.2655822 1.0590041 0.32838982  
0.38247266 1 2016 "tags=21%, list=14%, signal=24%"  
GSE11864\_CSF1\_PAM3CYS\_VS\_CSF1\_IFNG\_PAM3CYS\_IN\_MAC\_UP  
GSE11864\_CSF1\_PAM3CYS\_VS\_CSF1\_IFNG\_PAM3CYS\_IN\_MAC\_UP  
130 0.25870588 1.0588193 0.33333334  
0.38273856 1 2401 "tags=25%, list=17%, signal=29%"  
GSE1740\_MCSF\_VS\_MCSF\_AND\_IFNG\_DAY2\_DERIVED\_MACROPHAGE\_WITH\_IFNA\_STIM  
\_UP  
GSE1740\_MCSF\_VS\_MCSF\_AND\_IFNG\_DAY2\_DERIVED\_MACROPHAGE\_WITH\_IFNA\_STIM  
\_UP 133 0.26043138 1.057233 0.31905782  
0.38621977 1 2594 "tags=32%, list=18%, signal=39%"  
GSE18893\_TCONV\_VS\_TREG\_2H\_CULTURE\_UP  
GSE18893\_TCONV\_VS\_TREG\_2H\_CULTURE\_UP 138  
0.25496858 1.0570905 0.3067227 0.38639772  
1 1666 "tags=18%, list=12%, signal=20%"  
GSE37301\_HEMATOPOIETIC\_STEM\_CELL\_VS\_COMMON\_LYMPHOID\_PROGENITOR\_UP  
GSE37301\_HEMATOPOIETIC\_STEM\_CELL\_VS\_COMMON\_LYMPHOID\_PROGENITOR\_UP  
130 0.25404793 1.056241 0.31346577  
0.38822407 1 1994 "tags=21%, list=14%, signal=24%"  
GSE19772\_CTRL\_VS\_HCMV\_INF\_MONOCYTES\_AND\_PI3K\_INHIBITION\_UP  
GSE19772\_CTRL\_VS\_HCMV\_INF\_MONOCYTES\_AND\_PI3K\_INHIBITION\_UP  
124 0.26262197 1.0561912 0.33539096  
0.3881637 1 2078 "tags=22%, list=15%, signal=25%"

GSE22935\_UNSTIM\_VS\_12H\_MBOVIS\_BCG\_STIM\_MACROPHAGE\_DN  
GSE22935\_UNSTIM\_VS\_12H\_MBOVIS\_BCG\_STIM\_MACROPHAGE\_DN  
151 0.25458238 1.0560949 0.33194155  
0.38823414 1 2308 "tags=23%, list=16%, signal=27%"  
GSE3920\_UNTREATED\_VS\_IFNA\_TREATED\_ENDOTHELIAL\_CELL\_UP  
GSE3920\_UNTREATED\_VS\_IFNA\_TREATED\_ENDOTHELIAL\_CELL\_UP  
147 0.25483954 1.0556899 0.32786885  
0.3890297 1 2083 "tags=24%, list=15%, signal=28%"  
GSE17721\_0.5H\_VS\_12H\_POLYIC\_BMDC\_DN  
GSE17721\_0.5H\_VS\_12H\_POLYIC\_BMDC\_DN 155  
0.2536517 1.0554161 0.32007954 0.38950944  
1 2042 "tags=24%, list=14%, signal=28%"  
GSE43863\_TH1\_VS\_TFH\_MEMORY\_CD4\_TCELL\_UP  
GSE43863\_TH1\_VS\_TFH\_MEMORY\_CD4\_TCELL\_UP 147  
0.25449368 1.0550271 0.303719 0.39025292 1  
2646 "tags=31%, list=19%, signal=37%"  
GSE1460\_INTRATHYMIC\_T\_PROGENITOR\_VS\_THYMIC\_STROMAL\_CELL\_DN  
GSE1460\_INTRATHYMIC\_T\_PROGENITOR\_VS\_THYMIC\_STROMAL\_CELL\_DN  
146 0.25547782 1.0544863 0.32730925  
0.39130908 1 1912 "tags=19%, list=14%, signal=22%"  
GSE2405\_0H\_VS\_1.5H\_A\_PHAGOCYTOPHILUM\_STIM\_NEUTROPHIL\_UP  
GSE2405\_0H\_VS\_1.5H\_A\_PHAGOCYTOPHILUM\_STIM\_NEUTROPHIL\_UP  
158 0.25067946 1.0544797 0.32489452  
0.39115694 1 2718 "tags=25%, list=19%, signal=30%"  
GSE21033\_CTRL\_VS\_POLYIC\_STIM\_DC\_1H\_UP  
GSE21033\_CTRL\_VS\_POLYIC\_STIM\_DC\_1H\_UP 132  
0.26120096 1.0539966 0.31333333 0.39212126  
1 1614 "tags=16%, list=11%, signal=18%"  
GSE41176\_UNSTIM\_VS\_ANTI\_IGM\_STIM\_BCELL\_1H\_DN  
GSE41176\_UNSTIM\_VS\_ANTI\_IGM\_STIM\_BCELL\_1H\_DN 136  
0.2573513 1.0539182 0.33620688 0.39212322  
1 2083 "tags=27%, list=15%, signal=32%"  
GSE21360\_SECONDARY\_VS\_QUATERNARY\_MEMORY\_CD8\_TCELL\_DN  
GSE21360\_SECONDARY\_VS\_QUATERNARY\_MEMORY\_CD8\_TCELL\_DN  
136 0.2596063 1.0534761 0.34331337  
0.39302173 1 2572 "tags=26%, list=18%, signal=32%"  
GSE27859\_MACROPHAGE\_VS\_CD11C\_INT\_F480\_HI\_MACROPHAGE\_UP  
GSE27859\_MACROPHAGE\_VS\_CD11C\_INT\_F480\_HI\_MACROPHAGE\_UP  
136 0.25821877 1.0531707 0.3480084  
0.39359328 1 2222 "tags=28%, list=16%, signal=33%"  
GSE2770\_IL12\_VS\_TGFB\_AND\_IL12\_TREATED\_ACT\_CD4\_TCELL\_2H\_UP  
GSE2770\_IL12\_VS\_TGFB\_AND\_IL12\_TREATED\_ACT\_CD4\_TCELL\_2H\_UP  
91 0.27405626 1.053066 0.33710408 0.39367878  
1 1578 "tags=19%, list=11%, signal=21%"  
GSE7460\_WT\_VS\_FOXP3\_HET\_ACT\_WITH\_TGFB\_TCONV\_DN  
GSE7460\_WT\_VS\_FOXP3\_HET\_ACT\_WITH\_TGFB\_TCONV\_DN 143  
0.2564327 1.0530463 0.31666666 0.39354995  
1 1999 "tags=22%, list=14%, signal=25%"  
GSE17721\_PAM3CSK4\_VS\_CPG\_4H\_BMDC\_DN  
GSE17721\_PAM3CSK4\_VS\_CPG\_4H\_BMDC\_DN 154  
0.25174636 1.052983 0.32258064 0.3935374 1  
2352 "tags=27%, list=17%, signal=32%"  
GSE8621\_LPS\_STIM\_VS\_LPS\_PRIMED\_AND\_LPS\_STIM\_MACROPHAGE\_UP  
GSE8621\_LPS\_STIM\_VS\_LPS\_PRIMED\_AND\_LPS\_STIM\_MACROPHAGE\_UP



|                                                                  |                                  |                                  |                                  |            |
|------------------------------------------------------------------|----------------------------------|----------------------------------|----------------------------------|------------|
| 154                                                              | 0.24742395                       | 1.0528336                        | 0.32371134                       |            |
| 0.39370018                                                       | 1                                | 2530                             | "tags=23%, list=18%, signal=27%" |            |
| GSE2770_IL12_ACT_VS_ACT_CD4_TCELL_48H_UP                         |                                  |                                  |                                  |            |
| GSE2770_IL12_ACT_VS_ACT_CD4_TCELL_48H_UP                         |                                  |                                  |                                  | 145        |
| 0.25385424                                                       | 1.0523604                        | 0.32489452                       | 0.39463428                       |            |
| 1                                                                | 3096                             | "tags=38%, list=22%, signal=48%" |                                  |            |
| GSE38696_LIGHT_ZONE_VS_DARK_ZONE_BCELL_DN                        |                                  |                                  |                                  |            |
| GSE38696_LIGHT_ZONE_VS_DARK_ZONE_BCELL_DN                        |                                  |                                  |                                  | 105        |
| 0.2636316                                                        | 1.0513619                        | 0.3326316                        | 0.39681107                       |            |
| 1                                                                | 2359                             | "tags=22%, list=17%, signal=26%" |                                  |            |
| GSE3982_BCELL_VS_BASOPHIL_UP                                     |                                  | GSE3982_BCELL_VS_BASOPHIL_UP     |                                  |            |
|                                                                  | 125                              | 0.25965744                       | 1.0509834                        | 0.3531915  |
| 0.3975513                                                        | 1                                | 2929                             | "tags=32%, list=21%, signal=40%" |            |
| GSE22432_CONVENTIONAL_CDC_VS_PLASMACYTOID_PDC_DN                 |                                  |                                  |                                  |            |
| GSE22432_CONVENTIONAL_CDC_VS_PLASMACYTOID_PDC_DN                 |                                  |                                  |                                  | 153        |
| 0.25582474                                                       | 1.0507989                        | 0.32635984                       | 0.39781135                       |            |
| 1                                                                | 2745                             | "tags=32%, list=19%, signal=39%" |                                  |            |
| GSE46606_DAY1_VS_DAY3_CD40L_IL2_IL5_STIMULATED_IRF4HIGH_BCELL_UP |                                  |                                  |                                  |            |
| GSE46606_DAY1_VS_DAY3_CD40L_IL2_IL5_STIMULATED_IRF4HIGH_BCELL_UP |                                  |                                  |                                  |            |
|                                                                  | 133                              | 0.25524127                       | 1.0505425                        | 0.3204301  |
| 0.39823824                                                       | 1                                | 2018                             | "tags=23%, list=14%, signal=26%" |            |
| GSE5099_DAY3_VS_DAY7_MCSF_TREATED_MACROPHAGE_UP                  |                                  |                                  |                                  |            |
| GSE5099_DAY3_VS_DAY7_MCSF_TREATED_MACROPHAGE_UP                  |                                  |                                  |                                  | 116        |
| 0.26171502                                                       | 1.050464                         | 0.34979424                       | 0.39823943                       | 1          |
| 1863                                                             | "tags=22%, list=13%, signal=26%" |                                  |                                  |            |
| GSE43863_TFH_VS_LY6C_INT_CXCR5POS_EFFECTOR_CD4_TCELL_UP          |                                  |                                  |                                  |            |
| GSE43863_TFH_VS_LY6C_INT_CXCR5POS_EFFECTOR_CD4_TCELL_UP          |                                  |                                  |                                  |            |
| 157                                                              | 0.25024337                       | 1.0503315                        | 0.34745762                       |            |
| 0.39837304                                                       | 1                                | 2482                             | "tags=24%, list=18%, signal=29%" |            |
| GSE21670_UNTREATED_VS_TGFB_TREATED_CD4_TCELL_UP                  |                                  |                                  |                                  |            |
| GSE21670_UNTREATED_VS_TGFB_TREATED_CD4_TCELL_UP                  |                                  |                                  |                                  | 135        |
| 0.25781718                                                       | 1.0501826                        | 0.32832617                       | 0.3985581                        |            |
| 1                                                                | 278                              | "tags=4%, list=2%, signal=4%"    |                                  |            |
| GSE27786_BCELL_VS_NKCELL_UP                                      |                                  | GSE27786_BCELL_VS_NKCELL_UP      |                                  |            |
|                                                                  | 139                              | 0.25560734                       | 1.0500617                        | 0.33119658 |
| 0.3986673                                                        | 1                                | 1925                             | "tags=18%, list=14%, signal=21%" |            |
| GSE21927_BALBC_VS_C57BL6_MONOCYTE_SPLEEN_UP                      |                                  |                                  |                                  |            |
| GSE21927_BALBC_VS_C57BL6_MONOCYTE_SPLEEN_UP                      |                                  |                                  |                                  | 112        |
| 0.26432124                                                       | 1.0499474                        | 0.37313432                       | 0.39875573                       |            |
| 1                                                                | 2033                             | "tags=26%, list=14%, signal=30%" |                                  |            |
| GSE11961_PLASMA_CELL_DAY7_VS_GERMINAL_CENTER_BCELL_DAY40_DN      |                                  |                                  |                                  |            |
| GSE11961_PLASMA_CELL_DAY7_VS_GERMINAL_CENTER_BCELL_DAY40_DN      |                                  |                                  |                                  |            |
| 137                                                              | 0.25571078                       | 1.0495561                        | 0.33755276                       |            |
| 0.39947978                                                       | 1                                | 1295                             | "tags=12%, list=9%, signal=14%"  |            |
| GSE43863_NAIVE_VS_MEMORY_TH1_CD4_TCELL_D150_LCMV_DN              |                                  |                                  |                                  |            |
| GSE43863_NAIVE_VS_MEMORY_TH1_CD4_TCELL_D150_LCMV_DN              |                                  |                                  |                                  |            |
| 91                                                               | 0.2701743                        | 1.0491453                        | 0.35176992                       |            |
| 0.40027857                                                       | 1                                | 741                              | "tags=9%, list=5%, signal=9%"    |            |
| GSE17721_LPS_VS_GARDIQUIMOD_0.5H_BMDC_UP                         |                                  |                                  |                                  |            |
| GSE17721_LPS_VS_GARDIQUIMOD_0.5H_BMDC_UP                         |                                  |                                  |                                  | 156        |
| 0.25134784                                                       | 1.0488858                        | 0.33541667                       | 0.40075967                       |            |
| 1                                                                | 1991                             | "tags=24%, list=14%, signal=27%" |                                  |            |
| GSE3982_DC_VS_BASOPHIL_DN                                        |                                  | GSE3982_DC_VS_BASOPHIL_DN        |                                  | 128        |
| 0.25861275                                                       | 1.0486459                        | 0.33194155                       | 0.4011415                        |            |

|                                                                     |            |                                  |                                  |            |
|---------------------------------------------------------------------|------------|----------------------------------|----------------------------------|------------|
| 1                                                                   | 2776       | "tags=33%, list=20%, signal=40%" |                                  |            |
| GSE13522_CTRL_VS_T_CRUZI_Y_STRAIN_INF_SKIN_IFNG_KO_DN               |            |                                  |                                  |            |
| GSE13522_CTRL_VS_T_CRUZI_Y_STRAIN_INF_SKIN_IFNG_KO_DN               |            |                                  |                                  |            |
| 105                                                                 | 0.2653934  | 1.0483348                        | 0.34632036                       |            |
| 0.40166244                                                          | 1          | 1871                             | "tags=19%, list=13%, signal=22%" |            |
| GSE17721_LPS_VS_PAM3CSK4_0.5H_BMDC_UP                               |            |                                  |                                  |            |
| GSE17721_LPS_VS_PAM3CSK4_0.5H_BMDC_UP                               |            |                                  |                                  |            |
| 0.25539115                                                          | 1.0482576  | 0.33264032                       | 0.4016729                        | 147        |
| 1                                                                   | 2479       | "tags=23%, list=18%, signal=28%" |                                  |            |
| GSE17721_LPS_VS_PAM3CSK4_6H_BMDC_UP                                 |            |                                  |                                  |            |
| GSE17721_LPS_VS_PAM3CSK4_6H_BMDC_UP                                 |            |                                  |                                  |            |
| 0.25001404                                                          | 1.0480868  | 0.3279678                        | 0.40190843                       | 160        |
| 1                                                                   | 1542       | "tags=16%, list=11%, signal=18%" |                                  |            |
| GSE46606_IRF4HIGH_VS_IRF4MID_CD40L_IL2_IL5_DAY1_STIMULATED_BCELL_DN |            |                                  |                                  |            |
| GSE46606_IRF4HIGH_VS_IRF4MID_CD40L_IL2_IL5_DAY1_STIMULATED_BCELL_DN |            |                                  |                                  |            |
|                                                                     | 144        | 0.254018                         | 1.0477607                        | 0.33122364 |
| 0.40250006                                                          | 1          | 898                              | "tags=10%, list=6%, signal=11%"  |            |
| GSE26030_UNSTIM_VS_RESTIM_TH17_DAY5_POST_POLARIZATION_DN            |            |                                  |                                  |            |
| GSE26030_UNSTIM_VS_RESTIM_TH17_DAY5_POST_POLARIZATION_DN            |            |                                  |                                  |            |
| 141                                                                 | 0.2548245  | 1.046811                         | 0.34061137                       | 0.4045423  |
| 1                                                                   | 2434       | "tags=28%, list=17%, signal=34%" |                                  |            |
| GSE21033_CTRL_VS_POLYIC_STIM_DC_12H_DN                              |            |                                  |                                  |            |
| GSE21033_CTRL_VS_POLYIC_STIM_DC_12H_DN                              |            |                                  |                                  |            |
| 0.25379646                                                          | 1.0464935  | 0.32905984                       | 0.40513003                       | 143        |
| 1                                                                   | 2161       | "tags=22%, list=15%, signal=25%" |                                  |            |
| GSE6259_33D1_POS_DC_VS_CD8_TCELL_DN                                 |            |                                  |                                  |            |
| GSE6259_33D1_POS_DC_VS_CD8_TCELL_DN                                 |            |                                  |                                  |            |
| 0.2652023                                                           | 1.0457486  | 0.36402568                       | 0.40676278                       | 99         |
| 1                                                                   | 1930       | "tags=22%, list=14%, signal=26%" |                                  |            |
| GSE15930_STIM_VS_STIM_AND_TRICHOSTATINA_72H_CD8_T_CELL_DN           |            |                                  |                                  |            |
| GSE15930_STIM_VS_STIM_AND_TRICHOSTATINA_72H_CD8_T_CELL_DN           |            |                                  |                                  |            |
| 158                                                                 | 0.24751125 | 1.0454569                        | 0.3375                           | 0.40731022 |
| 1                                                                   | 2423       | "tags=26%, list=17%, signal=31%" |                                  |            |
| GSE34515_CD16_NEG_MONOCYTE_VS_DC_UP                                 |            |                                  |                                  |            |
| GSE34515_CD16_NEG_MONOCYTE_VS_DC_UP                                 |            |                                  |                                  |            |
| 0.2538714                                                           | 1.0453198  | 0.3231441                        | 0.40746832                       | 147        |
| 1                                                                   | 2489       | "tags=27%, list=18%, signal=33%" |                                  |            |
| GSE17721_POLYIC_VS_PAM3CSK4_24H_BMDC_UP                             |            |                                  |                                  |            |
| GSE17721_POLYIC_VS_PAM3CSK4_24H_BMDC_UP                             |            |                                  |                                  |            |
| 0.2524682                                                           | 1.0452322  | 0.33618844                       | 0.40749168                       | 153        |
| 1                                                                   | 2249       | "tags=23%, list=16%, signal=27%" |                                  |            |
| GSE8621_LPS_PRIMED_UNSTIM_VS_LPS_PRIMED_AND_LPS_STIM_MACROPHAGE_UP  |            |                                  |                                  |            |
| GSE8621_LPS_PRIMED_UNSTIM_VS_LPS_PRIMED_AND_LPS_STIM_MACROPHAGE_UP  |            |                                  |                                  |            |
|                                                                     | 152        | 0.25212657                       | 1.0447445                        | 0.35053763 |
| 0.40848902                                                          | 1          | 1474                             | "tags=18%, list=10%, signal=20%" |            |
| GSE17721_POLYIC_VS_CPG_1H_BMDC_UP                                   |            |                                  |                                  |            |
| GSE17721_POLYIC_VS_CPG_1H_BMDC_UP                                   |            |                                  |                                  |            |
|                                                                     | 148        | 0.25142896                       | 1.0444248                        | 0.34189722 |
| 0.40910587                                                          | 1          | 2285                             | "tags=26%, list=16%, signal=31%" |            |
| GSE360_DC_VS_MAC_L_MAJOR_DN                                         |            |                                  |                                  |            |
| GSE360_DC_VS_MAC_L_MAJOR_DN                                         |            |                                  |                                  |            |
|                                                                     | 149        | 0.25655857                       | 1.0442333                        | 0.36703297 |
| 0.40940446                                                          | 1          | 1896                             | "tags=19%, list=13%, signal=21%" |            |
| GSE29164_DAY3_VS_DAY7_UNTREATED_MELANOMA_UP                         |            |                                  |                                  |            |
| GSE29164_DAY3_VS_DAY7_UNTREATED_MELANOMA_UP                         |            |                                  |                                  |            |
|                                                                     |            |                                  |                                  | 119        |
| 0.26175103                                                          | 1.0436745  | 0.37744033                       | 0.41059005                       |            |

|                                                                |            |                                  |            |     |
|----------------------------------------------------------------|------------|----------------------------------|------------|-----|
| 1                                                              | 2239       | "tags=24%, list=16%, signal=29%" |            |     |
| GSE45365_CD8A_DC_VS_CD11B_DC_IFNAR_K0_DN                       |            |                                  |            |     |
| GSE45365_CD8A_DC_VS_CD11B_DC_IFNAR_K0_DN                       |            |                                  |            |     |
| 0.2604252                                                      | 1.0433966  | 0.36580086                       | 0.41105086 | 123 |
| 1                                                              | 2569       | "tags=33%, list=18%, signal=40%" |            |     |
| GSE25087_TREG_VS_TCONV_FETUS_DN                                |            |                                  |            |     |
| GSE25087_TREG_VS_TCONV_FETUS_DN                                |            |                                  |            |     |
| 0.41090742                                                     | 1.0433798  | 0.3531915                        |            |     |
| 0.41090742                                                     | 1.0433798  | 0.3531915                        | 0.3531915  |     |
| "tags=39%, list=21%, signal=49%"                               |            |                                  |            |     |
| GSE360_L_MAJOR_VS_M_TUBERCULOSIS_MAC_UP                        |            |                                  |            |     |
| GSE360_L_MAJOR_VS_M_TUBERCULOSIS_MAC_UP                        |            |                                  |            |     |
| 0.25258452                                                     | 1.0433036  | 0.3457557                        | 0.41092813 | 142 |
| 1                                                              | 2311       | "tags=20%, list=16%, signal=23%" |            |     |
| GSE22432_UNTREATED_VS_TGFB1_TREATED_COMMON_DC_PROGENITOR_UP    |            |                                  |            |     |
| GSE22432_UNTREATED_VS_TGFB1_TREATED_COMMON_DC_PROGENITOR_UP    |            |                                  |            |     |
| 156                                                            | 0.25121245 | 1.0429897                        | 0.33808553 |     |
| 0.41152993                                                     | 1.0429897  | 0.33808553                       |            |     |
| 0.41152993                                                     | 1.0429897  | 0.33808553                       |            |     |
| "tags=26%, list=17%, signal=31%"                               |            |                                  |            |     |
| GSE22611_NOD2_TRANSD_VS_CTRL_TRANSD_HEK293_MDP_STIM_6H_UP      |            |                                  |            |     |
| GSE22611_NOD2_TRANSD_VS_CTRL_TRANSD_HEK293_MDP_STIM_6H_UP      |            |                                  |            |     |
| 138                                                            | 0.2538073  | 1.0422698                        | 0.34745762 |     |
| 0.41307545                                                     | 1.0422698  | 0.34745762                       |            |     |
| 0.41307545                                                     | 1.0422698  | 0.34745762                       |            |     |
| "tags=14%, list=10%, signal=15%"                               |            |                                  |            |     |
| GSE3982_CTRL_VS_LPS_1H_NEUTROPHIL_DN                           |            |                                  |            |     |
| GSE3982_CTRL_VS_LPS_1H_NEUTROPHIL_DN                           |            |                                  |            |     |
| 0.25377014                                                     | 1.0421451  | 0.33966243                       | 0.4131683  | 139 |
| 1                                                              | 1880       | "tags=19%, list=13%, signal=21%" |            |     |
| GSE34156_UNTREATED_VS_24H_TLR1_TLR2_LIGAND_TREATED_MONOCYTE_DN |            |                                  |            |     |
| GSE34156_UNTREATED_VS_24H_TLR1_TLR2_LIGAND_TREATED_MONOCYTE_DN |            |                                  |            |     |
| 0.41331968                                                     | 1.0420158  | 0.36784142                       |            |     |
| 0.41331968                                                     | 1.0420158  | 0.36784142                       |            |     |
| "tags=26%, list=17%, signal=31%"                               |            |                                  |            |     |
| GSE46143_CTRL_VS_LMP2A_TRANSDUCED_CD10_POS_GC_BCELL_UP         |            |                                  |            |     |
| GSE46143_CTRL_VS_LMP2A_TRANSDUCED_CD10_POS_GC_BCELL_UP         |            |                                  |            |     |
| 161                                                            | 0.24840333 | 1.0419415                        | 0.35112935 |     |
| 0.41333333                                                     | 1.0419415  | 0.35112935                       |            |     |
| 0.41333333                                                     | 1.0419415  | 0.35112935                       |            |     |
| "tags=19%, list=15%, signal=22%"                               |            |                                  |            |     |
| GSE18893_TCONV_VS_TREG_2H_TNF_STIM_UP                          |            |                                  |            |     |
| GSE18893_TCONV_VS_TREG_2H_TNF_STIM_UP                          |            |                                  |            |     |
| 0.2536863                                                      | 1.0419357  | 0.35331905                       | 0.41317144 | 142 |
| 1                                                              | 1337       | "tags=14%, list=9%, signal=15%"  |            |     |
| GSE37301_MULTIPOTENT_PROGENITOR_VS_CD4_TCELL_UP                |            |                                  |            |     |
| GSE37301_MULTIPOTENT_PROGENITOR_VS_CD4_TCELL_UP                |            |                                  |            |     |
| 0.25373992                                                     | 1.0418038  | 0.38135594                       | 0.41331896 | 141 |
| 1                                                              | 2578       | "tags=33%, list=18%, signal=40%" |            |     |
| GSE9960_GRAM_NEG_VS_GRAM_POS_SEPSIS_PBMC_UP                    |            |                                  |            |     |
| GSE9960_GRAM_NEG_VS_GRAM_POS_SEPSIS_PBMC_UP                    |            |                                  |            |     |
| 0.25395885                                                     | 1.0417324  | 0.34504133                       | 0.41331196 | 134 |
| 1                                                              | 867        | "tags=13%, list=6%, signal=13%"  |            |     |
| GSE45881_CXCR6HI_VS_CXCR1LO_COLONIC_LAMINA_PROPRIA_DN          |            |                                  |            |     |
| GSE45881_CXCR6HI_VS_CXCR1LO_COLONIC_LAMINA_PROPRIA_DN          |            |                                  |            |     |
| 141                                                            | 0.2535765  | 1.0416797                        | 0.36263737 |     |
| 0.4132484                                                      | 1.0416797  | 0.36263737                       |            |     |
| 0.4132484                                                      | 1.0416797  | 0.36263737                       |            |     |
| "tags=30%, list=17%, signal=36%"                               |            |                                  |            |     |
| GSE17721_POLYIC_VS_CPG_4H_BMDC_DN                              |            |                                  |            |     |
| GSE17721_POLYIC_VS_CPG_4H_BMDC_DN                              |            |                                  |            |     |
| 0.41359925                                                     | 1.0414551  | 0.37612614                       |            |     |
| 0.41359925                                                     | 1.0414551  | 0.37612614                       |            |     |
| "tags=25%, list=15%, signal=29%"                               |            |                                  |            |     |
| GSE43955_1H_VS_42H_ACT_CD4_TCELL_WITH_TGFB_IL6_DN              |            |                                  |            |     |
| GSE43955_1H_VS_42H_ACT_CD4_TCELL_WITH_TGFB_IL6_DN              |            |                                  |            |     |
| 0.24856013                                                     | 1.0410537  | 0.38036808                       | 0.41442475 | 159 |

1 896 "tags=10%, list=6%, signal=11%"  
GSE31082\_DN\_VS\_DP\_THYMOCYTE\_DN GSE31082\_DN\_VS\_DP\_THYMOCYTE\_DN  
148 0.2502421 1.0407561 0.36717063  
0.4149732 1 2680 "tags=32%, list=19%, signal=39%"  
GSE25677\_MPL\_VS\_MPL\_AND\_R848\_STIM\_BCELL\_UP  
GSE25677\_MPL\_VS\_MPL\_AND\_R848\_STIM\_BCELL\_UP 121  
0.25773805 1.0399525 0.37634408 0.41676694  
1 2499 "tags=31%, list=18%, signal=37%"  
GSE9601\_NFKB\_INHIBITOR\_VS\_PI3K\_INHIBITOR\_TREATED\_HCMV\_INF\_MONOCYTE\_U  
P  
GSE9601\_NFKB\_INHIBITOR\_VS\_PI3K\_INHIBITOR\_TREATED\_HCMV\_INF\_MONOCYTE\_U  
P 151 0.25218564 1.0388595  
0.36713997 0.41925287 1 2275 "tags=27%,  
list=16%, signal=32%"  
GSE36476\_YOUNG\_VS\_OLD\_DONOR\_MEMORY\_CD4\_TCELL\_UP  
GSE36476\_YOUNG\_VS\_OLD\_DONOR\_MEMORY\_CD4\_TCELL\_UP 122  
0.25818598 1.0385486 0.36637932 0.41983563  
1 1106 "tags=13%, list=8%, signal=14%"  
GSE17721\_LPS\_VS\_CPG\_6H\_BMDC\_UP GSE17721\_LPS\_VS\_CPG\_6H\_BMDC\_UP  
166 0.24831499 1.0376905 0.3566879  
0.42173386 1 2364 "tags=23%, list=17%, signal=27%"  
GSE16385\_UNTREATED\_VS\_12H\_IL4\_TREATED\_MACROPHAGE\_UP  
GSE16385\_UNTREATED\_VS\_12H\_IL4\_TREATED\_MACROPHAGE\_UP  
156 0.2494983 1.0376054 0.33950618  
0.42176533 1 2221 "tags=22%, list=16%, signal=26%"  
GSE18281\_CORTEX\_VS\_MEDULLA\_THYMUS\_DN  
GSE18281\_CORTEX\_VS\_MEDULLA\_THYMUS\_DN 126  
0.25688276 1.0374824 0.35490605 0.4218722  
1 1232 "tags=16%, list=9%, signal=17%"  
GSE43700\_UNTREATED\_VS\_IL10\_TREATED\_PBMC\_UP  
GSE43700\_UNTREATED\_VS\_IL10\_TREATED\_PBMC\_UP 157  
0.24736777 1.0370643 0.36034116 0.4226886  
1 2360 "tags=22%, list=17%, signal=26%"  
GSE17721\_PAM3CSK4\_VS\_GADIQUIMOD\_12H\_BMDC\_DN  
GSE17721\_PAM3CSK4\_VS\_GADIQUIMOD\_12H\_BMDC\_DN 157  
0.25148827 1.0361794 0.36325678 0.42468533  
1 2841 "tags=30%, list=20%, signal=37%"  
GSE41867\_NAIVE\_VS\_DAY8\_LCMV\_ARMSTRONG\_EFFECTOR\_CD8\_TCELL\_UP  
GSE41867\_NAIVE\_VS\_DAY8\_LCMV\_ARMSTRONG\_EFFECTOR\_CD8\_TCELL\_UP  
144 0.2479324 1.0357696 0.38493723  
0.42546555 1 2973 "tags=33%, list=21%, signal=41%"  
GSE18804\_SPLEEN\_MACROPHAGE\_VS\_BRAIN\_TUMORAL\_MACROPHAGE\_DN  
GSE18804\_SPLEEN\_MACROPHAGE\_VS\_BRAIN\_TUMORAL\_MACROPHAGE\_DN  
134 0.25456464 1.0349212 0.3722334  
0.4273344 1 2293 "tags=24%, list=16%, signal=28%"  
GSE3039\_CD4\_TCELL\_VS\_B2\_BCELL\_DN GSE3039\_CD4\_TCELL\_VS\_B2\_BCELL\_DN  
146 0.25051454 1.0346745 0.35684648  
0.42773074 1 1974 "tags=23%, list=14%, signal=27%"  
GSE37301 GRANULOCYTE\_MONOCYTE\_PROGENITOR\_VS\_RAG2\_KO\_NK\_CELL\_UP  
GSE37301 GRANULOCYTE\_MONOCYTE\_PROGENITOR\_VS\_RAG2\_KO\_NK\_CELL\_UP  
148 0.25202578 1.0346743 0.36477986  
0.42755005 1 2024 "tags=24%, list=14%, signal=27%"  
GSE17721\_LPS\_VS\_POLYIC\_24H\_BMDC\_DN  
GSE17721\_LPS\_VS\_POLYIC\_24H\_BMDC\_DN 150

|                                                                      |                                  |                                  |                                  |
|----------------------------------------------------------------------|----------------------------------|----------------------------------|----------------------------------|
| 0.25232923                                                           | 1.0345911                        | 0.3443299                        | 0.42757145                       |
| 1                                                                    | 1912                             | "tags=22%, list=14%, signal=25%" |                                  |
| GSE5589_UNSTIM_VS_45MIN_LPS_AND_IL10_STIM_MACROPHAGE_UP              |                                  |                                  |                                  |
| GSE5589_UNSTIM_VS_45MIN_LPS_AND_IL10_STIM_MACROPHAGE_UP              |                                  |                                  |                                  |
| 148                                                                  | 0.24705622                       | 1.0343539                        | 0.375 0.4279781                  |
| 1                                                                    | 2607                             | "tags=31%, list=18%, signal=38%" |                                  |
| GSE15930_STIM_VS_STIM_AND_IFNAB_72H_CD8_T_CELL_UP                    |                                  |                                  |                                  |
| GSE15930_STIM_VS_STIM_AND_IFNAB_72H_CD8_T_CELL_UP                    |                                  |                                  |                                  |
| 0.24777311                                                           | 1.03425                          | 0.36514524                       | 0.42804965 156                   |
| 2290                                                                 | "tags=22%, list=16%, signal=26%" |                                  |                                  |
| GSE17721_LPS_VS_CPG_12H_BMDC_DN                                      |                                  |                                  |                                  |
| GSE17721_LPS_VS_CPG_12H_BMDC_DN                                      |                                  |                                  |                                  |
| 154                                                                  | 0.24398431                       | 1.0331179                        | 0.35639414                       |
| 0.43066233                                                           | 1                                | 2393                             | "tags=21%, list=17%, signal=26%" |
| GSE7460_FOXP3_MUT_VS_HET_ACT_TCONV_UP                                |                                  |                                  |                                  |
| GSE7460_FOXP3_MUT_VS_HET_ACT_TCONV_UP                                |                                  |                                  |                                  |
| 1.0330199                                                            | 0.3838384                        | 0.43072152                       | 146 0.249617                     |
| 2502                                                                 | "tags=28%, list=18%, signal=34%" |                                  |                                  |
| GSE8621_UNSTIM_VS_LPS_PRIMED_AND_LPS_STIM_MACROPHAGE_DN              |                                  |                                  |                                  |
| GSE8621_UNSTIM_VS_LPS_PRIMED_AND_LPS_STIM_MACROPHAGE_DN              |                                  |                                  |                                  |
| 142                                                                  | 0.24975967                       | 1.033018                         | 0.3716075 0.43054295             |
| 1                                                                    | 2018                             | "tags=23%, list=14%, signal=27%" |                                  |
| GSE23308_WT_VS_MINERALCORTICOID_REC_KO_MACROPHAGE_CORTICOSTERONE_TRE |                                  |                                  |                                  |
| GSE23308_WT_VS_MINERALCORTICOID_REC_KO_MACROPHAGE_CORTICOSTERONE_TRE |                                  |                                  |                                  |
| ATED_UP                                                              |                                  |                                  |                                  |
| ATED_UP                                                              |                                  |                                  |                                  |
| 0.35497835                                                           | 0.43049568                       | 1                                | 2217 "tags=25%,                  |
| list=16%, signal=29%"                                                |                                  |                                  |                                  |
| GSE14769_UNSTIM_VS_120MIN_LPS_BMDM_UP                                |                                  |                                  |                                  |
| GSE14769_UNSTIM_VS_120MIN_LPS_BMDM_UP                                |                                  |                                  |                                  |
| 0.25559506                                                           | 1.0325044                        | 0.37885463                       | 121 0.4314404                    |
| 1                                                                    | 1535                             | "tags=21%, list=11%, signal=23%" |                                  |
| GSE17301_CTRL_VS_48H_ACD3_ACD28_STIM_CD8_TCELL_DN                    |                                  |                                  |                                  |
| GSE17301_CTRL_VS_48H_ACD3_ACD28_STIM_CD8_TCELL_DN                    |                                  |                                  |                                  |
| 0.2474238                                                            | 1.0316238                        | 0.36951983                       | 159 0.43345907                   |
| 1                                                                    | 2382                             | "tags=26%, list=17%, signal=31%" |                                  |
| GSE36891_POLYIC_TLR3_VS_PAM_TLR2_STIM_PERITONEAL_MACROPHAGE_DN       |                                  |                                  |                                  |
| GSE36891_POLYIC_TLR3_VS_PAM_TLR2_STIM_PERITONEAL_MACROPHAGE_DN       |                                  |                                  |                                  |
| 130                                                                  | 0.25498727                       | 1.0308609                        | 0.37419355                       |
| 0.43521303                                                           | 1                                | 2257                             | "tags=25%, list=16%, signal=30%" |
| GSE360_L_DONOVANI_VS_B_MALAYI_HIGH_DOSE_MAC_UP                       |                                  |                                  |                                  |
| GSE360_L_DONOVANI_VS_B_MALAYI_HIGH_DOSE_MAC_UP                       |                                  |                                  |                                  |
| 0.25258306                                                           | 1.0308082                        | 0.36472946                       | 129 0.43514735                   |
| 1                                                                    | 1728                             | "tags=21%, list=12%, signal=24%" |                                  |
| GSE10463_CD40L_AND_VA347_VS_CD40L_IN_DC_DN                           |                                  |                                  |                                  |
| GSE10463_CD40L_AND_VA347_VS_CD40L_IN_DC_DN                           |                                  |                                  |                                  |
| 0.25827137                                                           | 1.0305669                        | 0.37148595                       | 113 0.43555883                   |
| 1                                                                    | 1012                             | "tags=12%, list=7%, signal=12%"  |                                  |
| GSE21063_CTRL_VS_ANTI_IGM_STIM_BCELL_3H_DN                           |                                  |                                  |                                  |
| GSE21063_CTRL_VS_ANTI_IGM_STIM_BCELL_3H_DN                           |                                  |                                  |                                  |
| 0.2540294                                                            | 1.0302804                        | 0.39839035                       | 135 0.4360924                    |
| 1                                                                    | 2578                             | "tags=31%, list=18%, signal=38%" |                                  |
| GSE11924_TFH_VS_TH1_CD4_TCELL_UP                                     |                                  |                                  |                                  |
| GSE11924_TFH_VS_TH1_CD4_TCELL_UP                                     |                                  |                                  |                                  |
| 144                                                                  | 0.24712178                       | 1.0302229                        | 0.37708333                       |
| 0.4360516                                                            | 1                                | 2454                             | "tags=29%, list=17%, signal=35%" |

GSE6269\_HEALTHY\_VS\_STAPH\_AUREUS\_INF\_PBMC\_DN  
GSE6269\_HEALTHY\_VS\_STAPH\_AUREUS\_INF\_PBMC\_DN 139  
0.25155264 1.0301899 0.36460555 0.43595776  
1 2530 "tags=23%, list=18%, signal=28%"  
GSE13229\_IMM\_VS\_INTMATURE\_NKCELL\_UP  
GSE13229\_IMM\_VS\_INTMATURE\_NKCELL\_UP 138  
0.25177228 1.0294894 0.38266385 0.43749675  
1 1668 "tags=17%, list=12%, signal=19%"  
GSE2405\_0H\_VS\_24H\_A\_PHAGOCYTOPHILUM\_STIM\_NEUTROPHIL\_DN  
GSE2405\_0H\_VS\_24H\_A\_PHAGOCYTOPHILUM\_STIM\_NEUTROPHIL\_DN  
156 0.24917278 1.0287852 0.38709676  
0.43903783 1 1564 "tags=15%, list=11%, signal=16%"  
GSE27786\_BCELL\_VS\_NEUTROPHIL\_UP GSE27786\_BCELL\_VS\_NEUTROPHIL\_UP  
143 0.2516243 1.0286422 0.36659878  
0.43922952 1 2322 "tags=27%, list=16%, signal=31%"  
GSE17301\_ACD3\_ACD28\_VS\_ACD3\_ACD28\_AND\_IFNA5\_STIM\_CD8\_TCELL\_DN  
GSE17301\_ACD3\_ACD28\_VS\_ACD3\_ACD28\_AND\_IFNA5\_STIM\_CD8\_TCELL\_DN  
142 0.24970004 1.0282688 0.3747412  
0.4399772 1 2661 "tags=30%, list=19%, signal=37%"  
GSE37534\_UNTREATED\_VS\_ROSIGLITAZONE\_TREATED\_CD4\_TCELL\_PPARG1\_AND\_FOX  
P3\_TRASDUCED\_UP  
GSE37534\_UNTREATED\_VS\_ROSIGLITAZONE\_TREATED\_CD4\_TCELL\_PPARG1\_AND\_FOX  
P3\_TRASDUCED\_UP 136 0.25125134 1.028143  
0.36268345 0.44011042 1 1691 "tags=18%,  
list=12%, signal=21%"  
GSE17721\_CTRL\_VS\_LPS\_24H\_BMDC\_UP GSE17721\_CTRL\_VS\_LPS\_24H\_BMDC\_UP  
150 0.24835075 1.0268308 0.39157894  
0.44324538 1 2297 "tags=25%, list=16%, signal=29%"  
GSE10325\_CD4\_TCELL\_VS\_LUPUS\_CD4\_TCELL\_UP  
GSE10325\_CD4\_TCELL\_VS\_LUPUS\_CD4\_TCELL\_UP 137  
0.25683743 1.0268233 0.39539748 0.44307706  
1 1803 "tags=19%, list=13%, signal=22%"  
GSE9650\_NAIVE\_VS\_EXHAUSTED\_CD8\_TCELL\_DN  
GSE9650\_NAIVE\_VS\_EXHAUSTED\_CD8\_TCELL\_DN 160  
0.24196966 1.0267131 0.3910387 0.44315806  
1 2018 "tags=24%, list=14%, signal=27%"  
GSE6674\_UNSTIM\_VS\_PL2\_3\_STIM\_BCELL\_DN  
GSE6674\_UNSTIM\_VS\_PL2\_3\_STIM\_BCELL\_DN 144  
0.2529033 1.0257025 0.4 0.4454426 1  
2008 "tags=24%, list=14%, signal=27%"  
GSE41867\_LCMV\_ARMSTRONG\_VS\_CLONE13\_DAY15\_EFFECTOR\_CD8\_TCELL\_UP  
GSE41867\_LCMV\_ARMSTRONG\_VS\_CLONE13\_DAY15\_EFFECTOR\_CD8\_TCELL\_UP  
143 0.24808568 1.0254587 0.38641188  
0.44586793 1 2647 "tags=30%, list=19%, signal=37%"  
GSE37416\_CTRL\_VS\_3H\_F\_TULARENSIS\_LVS\_NEUTROPHIL\_DN  
GSE37416\_CTRL\_VS\_3H\_F\_TULARENSIS\_LVS\_NEUTROPHIL\_DN 129  
0.25108716 1.0248549 0.39285713 0.44721645  
1 3065 "tags=30%, list=22%, signal=38%"  
GSE22935\_24H\_VS\_48H\_MBOVIS\_BCG\_STIM\_MYD88\_KO\_MACROPHAGE\_UP  
GSE22935\_24H\_VS\_48H\_MBOVIS\_BCG\_STIM\_MYD88\_KO\_MACROPHAGE\_UP  
158 0.24629262 1.0241858 0.35639414  
0.44866627 1 1251 "tags=13%, list=9%, signal=14%"  
GSE17721\_0.5H\_VS\_24H\_POLYIC\_BMDC\_DN  
GSE17721\_0.5H\_VS\_24H\_POLYIC\_BMDC\_DN 149

|                                                                     |                                  |                                  |                                  |            |
|---------------------------------------------------------------------|----------------------------------|----------------------------------|----------------------------------|------------|
| 0.24473006                                                          | 1.024073                         | 0.39565217                       | 0.44876596                       | 1          |
| 2011                                                                | "tags=21%, list=14%, signal=25%" |                                  |                                  |            |
| GSE17721_0.5H_VS_12H_GARDIQUIMOD_BMDC_DN                            |                                  |                                  |                                  |            |
| GSE17721_0.5H_VS_12H_GARDIQUIMOD_BMDC_DN                            |                                  |                                  | 164                              |            |
| 0.24275276                                                          | 1.0240098                        | 0.4054054                        | 0.44873455                       |            |
| 1                                                                   | 2058                             | "tags=19%, list=15%, signal=22%" |                                  |            |
| GSE30971_2H_VS_4H_LPS_STIM_MACROPHAGE_WBP7_KO_UP                    |                                  |                                  |                                  |            |
| GSE30971_2H_VS_4H_LPS_STIM_MACROPHAGE_WBP7_KO_UP                    |                                  |                                  |                                  | 143        |
| 0.24704848                                                          | 1.0237663                        | 0.41422594                       | 0.4491698                        |            |
| 1                                                                   | 2353                             | "tags=23%, list=17%, signal=27%" |                                  |            |
| GSE2770_IL12_AND_TGFB_VS_IL4_TREATED_ACT_CD4_TCELL_2H_UP            |                                  |                                  |                                  |            |
| GSE2770_IL12_AND_TGFB_VS_IL4_TREATED_ACT_CD4_TCELL_2H_UP            |                                  |                                  |                                  |            |
| 141                                                                 | 0.24498451                       | 1.0230376                        | 0.40567952                       |            |
| 0.45083427                                                          | 1                                | 2296                             | "tags=27%, list=16%, signal=32%" |            |
| GSE3982_MAC_VS_BASOPHIL_UP                                          |                                  |                                  |                                  |            |
|                                                                     | 154                              | 0.24434231                       | 1.0229701                        | 0.396728   |
| 0.4508012                                                           | 1                                | 2382                             | "tags=25%, list=17%, signal=29%" |            |
| GSE13229_IMM_VS_INTMATURE_NKCELL_DN                                 |                                  |                                  |                                  |            |
| GSE13229_IMM_VS_INTMATURE_NKCELL_DN                                 |                                  |                                  |                                  | 143        |
| 0.2495325                                                           | 1.0226665                        | 0.39917696                       | 0.4514                           | 1          |
| 2215                                                                | "tags=26%, list=16%, signal=30%" |                                  |                                  |            |
| GSE3039_CD4_TCELL_VS_ALPHAALPHA_CD8_TCELL_UP                        |                                  |                                  |                                  |            |
| GSE3039_CD4_TCELL_VS_ALPHAALPHA_CD8_TCELL_UP                        |                                  |                                  |                                  | 157        |
| 0.24599104                                                          | 1.0224842                        | 0.37525773                       | 0.45164943                       |            |
| 1                                                                   | 1305                             | "tags=15%, list=9%, signal=17%"  |                                  |            |
| GSE35685_CD34POS_CD10NEG_CD62LP0S_VS_CD34POS_CD10POS_BONE_MARROW_DN |                                  |                                  |                                  |            |
| GSE35685_CD34POS_CD10NEG_CD62LP0S_VS_CD34POS_CD10POS_BONE_MARROW_DN |                                  |                                  |                                  |            |
|                                                                     | 157                              | 0.24685483                       | 1.0218365                        | 0.3940043  |
| 0.45311868                                                          | 1                                | 2319                             | "tags=28%, list=16%, signal=33%" |            |
| GSE11924_TFH_VS_TH17_CD4_TCELL_UP                                   |                                  |                                  |                                  |            |
| GSE11924_TFH_VS_TH17_CD4_TCELL_UP                                   |                                  |                                  |                                  |            |
|                                                                     | 144                              | 0.24524574                       | 1.021311                         | 0.40127388 |
| 0.45421144                                                          | 1                                | 2596                             | "tags=33%, list=18%, signal=40%" |            |
| GSE17721_POLYIC_VS_CPG_12H_BMDC_UP                                  |                                  |                                  |                                  |            |
| GSE17721_POLYIC_VS_CPG_12H_BMDC_UP                                  |                                  |                                  |                                  | 155        |
| 0.24472505                                                          | 1.0204779                        | 0.410596                         | 0.45610574                       | 1          |
| 2419                                                                | "tags=28%, list=17%, signal=33%" |                                  |                                  |            |
| GSE20152_SPHK1_KO_VS_HTNFA_OVEREXPRESS_ANKLE_UP                     |                                  |                                  |                                  |            |
| GSE20152_SPHK1_KO_VS_HTNFA_OVEREXPRESS_ANKLE_UP                     |                                  |                                  |                                  | 140        |
| 0.24478592                                                          | 1.0187589                        | 0.3815261                        | 0.46022362                       |            |
| 1                                                                   | 1698                             | "tags=17%, list=12%, signal=19%" |                                  |            |
| GSE36476_YOUNG_VS_OLD_DONOR_MEMORY_CD4_TCELL_16H_TSST_ACT_UP        |                                  |                                  |                                  |            |
| GSE36476_YOUNG_VS_OLD_DONOR_MEMORY_CD4_TCELL_16H_TSST_ACT_UP        |                                  |                                  |                                  |            |
|                                                                     | 134                              | 0.24900003                       | 1.0184982                        | 0.40041494 |
| 0.4606824                                                           | 1                                | 2379                             | "tags=23%, list=17%, signal=28%" |            |
| GSE22589_HEALTHY_VS_SIV_INFECTED_DC_UP                              |                                  |                                  |                                  |            |
| GSE22589_HEALTHY_VS_SIV_INFECTED_DC_UP                              |                                  |                                  |                                  | 143        |
| 0.2439652                                                           | 1.0184587                        | 0.3970588                        | 0.46059892                       |            |
| 1                                                                   | 2227                             | "tags=21%, list=16%, signal=25%" |                                  |            |
| GSE17721_LPS_VS_POLYIC_2H_BMDC_DN                                   |                                  |                                  |                                  |            |
| GSE17721_LPS_VS_POLYIC_2H_BMDC_DN                                   |                                  |                                  |                                  |            |
|                                                                     | 137                              | 0.24678577                       | 1.0181859                        | 0.3973799  |
| 0.46111426                                                          | 1                                | 3093                             | "tags=34%, list=22%, signal=43%" |            |
| GSE27786_LIN_NEG_VS_BCELL_DN                                        |                                  |                                  |                                  |            |
| GSE27786_LIN_NEG_VS_BCELL_DN                                        |                                  |                                  |                                  |            |
|                                                                     | 130                              | 0.25148013                       | 1.0174775                        | 0.4173387  |
| 0.46278352                                                          | 1                                | 2059                             | "tags=21%, list=15%, signal=24%" |            |

|                                                              |            |                                  |                                  |            |
|--------------------------------------------------------------|------------|----------------------------------|----------------------------------|------------|
| GSE42021_TREG_PLN_VS_CD24LO_TREG_THYMUS_DN                   |            |                                  |                                  |            |
| GSE42021_TREG_PLN_VS_CD24LO_TREG_THYMUS_DN                   |            |                                  | 129                              |            |
| 0.25039172                                                   | 1.0173694  | 0.4090909                        |                                  | 0.46285746 |
| 1                                                            | 1856       | "tags=21%, list=13%, signal=24%" |                                  |            |
| GSE24102_GRANULOCYSTITIC_MDSC_VS_NEUTROPHIL_UP               |            |                                  |                                  | 143        |
| GSE24102_GRANULOCYSTITIC_MDSC_VS_NEUTROPHIL_UP               |            |                                  |                                  |            |
| 0.24530078                                                   | 1.0172825  | 0.4057971                        |                                  | 0.46288985 |
| 1                                                            | 2682       | "tags=27%, list=19%, signal=32%" |                                  |            |
| GSE25088_CTRL_VS_IL4_STIM_MACROPHAGE_UP                      |            |                                  |                                  | 130        |
| GSE25088_CTRL_VS_IL4_STIM_MACROPHAGE_UP                      |            |                                  |                                  |            |
| 0.25221768                                                   | 1.0172102  | 0.43866944                       |                                  | 0.46288553 |
| 1                                                            | 875        | "tags=12%, list=6%, signal=12%"  |                                  |            |
| GSE9946_IMMATURE_VS_MATURE_STIMULATORY_DC_UP                 |            |                                  |                                  | 105        |
| GSE9946_IMMATURE_VS_MATURE_STIMULATORY_DC_UP                 |            |                                  |                                  |            |
| 0.25654095                                                   | 1.0170958  | 0.40248963                       |                                  | 0.46297365 |
| 1                                                            | 1795       | "tags=20%, list=13%, signal=23%" |                                  |            |
| GSE5503_MLN_DC_VS_PLN_DC_ACTIVATED_ALLOGENIC_TCELL_DN        |            |                                  |                                  |            |
| GSE5503_MLN_DC_VS_PLN_DC_ACTIVATED_ALLOGENIC_TCELL_DN        |            |                                  |                                  |            |
| 142                                                          | 0.2461193  | 1.0162505                        |                                  | 0.41497976 |
| 0.4649037                                                    | 1          | 2018                             | "tags=20%, list=14%, signal=24%" |            |
| GSE23505_UNTREATED_VS_4DAY_IL6_IL1_TGFB_TREATED_CD4_TCELL_UP |            |                                  |                                  |            |
| GSE23505_UNTREATED_VS_4DAY_IL6_IL1_TGFB_TREATED_CD4_TCELL_UP |            |                                  |                                  |            |
| 152                                                          | 0.24805756 | 1.0158703                        |                                  | 0.410101   |
| 0.46569523                                                   | 1          | 2228                             | "tags=24%, list=16%, signal=29%" |            |
| GSE21063_WT_VS_NFATC1_KO_BCELL_UP                            |            |                                  |                                  |            |
| GSE21063_WT_VS_NFATC1_KO_BCELL_UP                            |            |                                  |                                  |            |
| 152                                                          | 0.2447484  | 1.0158589                        |                                  | 0.41276595 |
| 0.46553454                                                   | 1          | 1668                             | "tags=18%, list=12%, signal=21%" |            |
| GSE24142_EARLY_THYMIC_PROGENITOR_VS_DN3_THYMOCYTE_UP         |            |                                  |                                  |            |
| GSE24142_EARLY_THYMIC_PROGENITOR_VS_DN3_THYMOCYTE_UP         |            |                                  |                                  |            |
| 163                                                          | 0.24444029 | 1.0157714                        |                                  | 0.41247484 |
| 0.46558288                                                   | 1          | 1897                             | "tags=21%, list=13%, signal=25%" |            |
| GSE22342_CD11C_HIGH_VS_LOW_DECIDUAL_MACROPHAGES_UP           |            |                                  |                                  |            |
| GSE22342_CD11C_HIGH_VS_LOW_DECIDUAL_MACROPHAGES_UP           |            |                                  |                                  | 115        |
| 0.25176185                                                   | 1.0156775  | 0.40733197                       |                                  | 0.46562457 |
| 1                                                            | 2712       | "tags=34%, list=19%, signal=42%" |                                  |            |
| GSE3039_CD4_TCELL_VS_NKT_CELL_UP                             |            |                                  |                                  |            |
| GSE3039_CD4_TCELL_VS_NKT_CELL_UP                             |            |                                  |                                  |            |
| 155                                                          | 0.24367675 | 1.0155658                        |                                  | 0.39529914 |
| 0.46572074                                                   | 1          | 2305                             | "tags=26%, list=16%, signal=31%" |            |
| GSE360_CTRL_VS_B_MALAYI_LOW_DOSE_DC_UP                       |            |                                  |                                  |            |
| GSE360_CTRL_VS_B_MALAYI_LOW_DOSE_DC_UP                       |            |                                  |                                  | 136        |
| 0.24747643                                                   | 1.0155098  | 0.42916667                       |                                  | 0.46566483 |
| 1                                                            | 1051       | "tags=14%, list=7%, signal=15%"  |                                  |            |
| GSE9960_GRAM_NEG_VS_GRAM_NEG_AND_POS_SEPSIS_PBMC_DN          |            |                                  |                                  |            |
| GSE9960_GRAM_NEG_VS_GRAM_NEG_AND_POS_SEPSIS_PBMC_DN          |            |                                  |                                  |            |
| 117                                                          | 0.2534066  | 1.0152336                        |                                  | 0.4047619  |
| 0.4661632                                                    | 1          | 2702                             | "tags=32%, list=19%, signal=40%" |            |
| GSE2770_IL12_VS_TGFB_AND_IL12_TREATED_ACT_CD4_TCELL_48H_UP   |            |                                  |                                  |            |
| GSE2770_IL12_VS_TGFB_AND_IL12_TREATED_ACT_CD4_TCELL_48H_UP   |            |                                  |                                  |            |
| 150                                                          | 0.242633   | 1.0149555                        |                                  | 0.41649485 |
| 0.4666658                                                    | 1          | 2856                             | "tags=33%, list=20%, signal=41%" |            |
| GSE17721_CTRL_VS_POLYIC_12H_BMDC_DN                          |            |                                  |                                  |            |
| GSE17721_CTRL_VS_POLYIC_12H_BMDC_DN                          |            |                                  |                                  | 162        |
| 0.23866853                                                   | 1.0144508  | 0.42307693                       |                                  | 0.46776143 |
| 1                                                            | 1589       | "tags=15%, list=11%, signal=17%" |                                  |            |



GSE1925\_CTRL\_VS\_24H\_IFNG\_STIM\_IFNG\_PRIMED\_MACROPHAGE\_UP  
GSE1925\_CTRL\_VS\_24H\_IFNG\_STIM\_IFNG\_PRIMED\_MACROPHAGE\_UP  
158 0.24297947 1.0142666 0.44989774  
0.4680173 1 1548 "tags=16%, list=11%, signal=18%"  
GSE30971\_2H\_VS\_4H\_LPS\_STIM\_MACROPHAGE\_WBP7\_KO\_DN  
GSE30971\_2H\_VS\_4H\_LPS\_STIM\_MACROPHAGE\_WBP7\_KO\_DN 126  
0.2479014 1.0139408 0.42793792 0.46862066  
1 799 "tags=10%, list=6%, signal=10%"  
GSE26030\_UNSTIM\_VS\_RESTIM\_TH17\_DAY15\_POST\_POLARIZATION\_UP  
GSE26030\_UNSTIM\_VS\_RESTIM\_TH17\_DAY15\_POST\_POLARIZATION\_UP  
146 0.24524021 1.0135697 0.39419088  
0.4693693 1 2371 "tags=29%, list=17%, signal=35%"  
GSE46242\_TH1\_VS\_ANERGIC\_TH1\_CD4\_TCELL\_WITH\_EGR2\_DELETED\_UP  
GSE46242\_TH1\_VS\_ANERGIC\_TH1\_CD4\_TCELL\_WITH\_EGR2\_DELETED\_UP  
130 0.25102767 1.0120977 0.42083332  
0.47302163 1 2026 "tags=25%, list=14%, signal=28%"  
GSE17721\_LPS\_VS\_POLYIC\_1H\_BMDC\_UP GSE17721\_LPS\_VS\_POLYIC\_1H\_BMDC\_UP  
156 0.24397948 1.0119963 0.4347826  
0.47307587 1 2720 "tags=26%, list=19%, signal=31%"  
GSE13411\_NAIVE\_VS\_IGM\_MEMORY\_BCELL\_UP  
GSE13411\_NAIVE\_VS\_IGM\_MEMORY\_BCELL\_UP 125  
0.25112155 1.0114834 0.4504717 0.47421458  
1 1355 "tags=17%, list=10%, signal=18%"  
GSE12366\_PLASMA\_CELL\_VS\_MEMORY\_BCELL\_UP  
GSE12366\_PLASMA\_CELL\_VS\_MEMORY\_BCELL\_UP 132  
0.2520844 1.010754 0.43067226 0.4758546 1  
2410 "tags=24%, list=17%, signal=29%"  
GSE2585\_AIRE\_KO\_VS\_WT\_CD80\_LOW\_MTEC\_DN  
GSE2585\_AIRE\_KO\_VS\_WT\_CD80\_LOW\_MTEC\_DN 154  
0.24148443 1.0105503 0.42474228 0.47620186  
1 1997 "tags=18%, list=14%, signal=21%"  
GSE23308\_CTRL\_VS\_CORTICOSTERONE\_TREATED\_MACROPHAGE\_DN  
GSE23308\_CTRL\_VS\_CORTICOSTERONE\_TREATED\_MACROPHAGE\_DN  
164 0.24042639 1.0100718 0.43157893  
0.4772253 1 1668 "tags=17%, list=12%, signal=19%"  
GSE25088\_WT\_VS\_STAT6\_KO\_MACROPHAGE\_UP  
GSE25088\_WT\_VS\_STAT6\_KO\_MACROPHAGE\_UP 138  
0.24737261 1.0099627 0.41983122 0.4773121  
1 2037 "tags=24%, list=14%, signal=28%"  
GSE9037\_CTRL\_VS\_LPS\_1H\_STIM\_BMDM\_UP  
GSE9037\_CTRL\_VS\_LPS\_1H\_STIM\_BMDM\_UP 122  
0.25037616 1.009453 0.41036716 0.47840467 1  
1872 "tags=21%, list=13%, signal=24%"  
GSE17186\_NAIVE\_VS\_CD21HIGH\_TRANSITIONAL\_BCELL\_CORD\_BLOOD\_UP  
GSE17186\_NAIVE\_VS\_CD21HIGH\_TRANSITIONAL\_BCELL\_CORD\_BLOOD\_UP  
149 0.24301925 1.0094458 0.44676408  
0.47822884 1 1832 "tags=23%, list=13%, signal=26%"  
GSE46606\_IRF4HIGH\_VS\_WT\_CD40L\_IL2\_IL5\_DAY1\_STIMULATED\_BCELL\_DN  
GSE46606\_IRF4HIGH\_VS\_WT\_CD40L\_IL2\_IL5\_DAY1\_STIMULATED\_BCELL\_DN  
145 0.24284878 1.0090365 0.40778688  
0.4790687 1 2356 "tags=24%, list=17%, signal=29%"  
GSE29164\_CD8\_TCELL\_VS\_CD8\_TCELL\_AND\_IL12\_TREATED\_MELANOMA\_DAY3\_UP  
GSE29164\_CD8\_TCELL\_VS\_CD8\_TCELL\_AND\_IL12\_TREATED\_MELANOMA\_DAY3\_UP  
147 0.24314114 1.0079838 0.42405063

|                                                                     |                                                                     |                                  |                                  |     |
|---------------------------------------------------------------------|---------------------------------------------------------------------|----------------------------------|----------------------------------|-----|
| 0.4815276                                                           | 1                                                                   | 3029                             | "tags=36%, list=21%, signal=45%" |     |
| GSE9960_HEALTHY_VS_SEPSIS_PPMC_DN                                   | GSE9960_HEALTHY_VS_SEPSIS_PPMC_DN                                   |                                  |                                  |     |
| 97                                                                  | 0.25582147                                                          | 1.007535                         | 0.39529914                       |     |
| 0.4825149                                                           | 1                                                                   | 1208                             | "tags=11%, list=9%, signal=12%"  |     |
| GSE40666_UNTREATED_VS_IFNA_STIM_STAT1_KO_CD8_TCELL_90MIN_UP         | GSE40666_UNTREATED_VS_IFNA_STIM_STAT1_KO_CD8_TCELL_90MIN_UP         |                                  |                                  |     |
| 115                                                                 | 0.25636253                                                          | 1.0071485                        | 0.4502924                        |     |
| 0.48332593                                                          | 1                                                                   | 2228                             | "tags=24%, list=16%, signal=29%" |     |
| GSE45365_CTRL_VS_MCMV_INFECTION_NK_CELL_DN                          | GSE45365_CTRL_VS_MCMV_INFECTION_NK_CELL_DN                          |                                  |                                  |     |
|                                                                     |                                                                     |                                  | 128                              |     |
| 0.24965774                                                          | 1.0064951                                                           | 0.41885966                       | 0.4848811                        |     |
| 1                                                                   | 1709                                                                | "tags=21%, list=12%, signal=24%" |                                  |     |
| GSE11924_TH1_VS_TH17_CD4_TCELL_UP                                   | GSE11924_TH1_VS_TH17_CD4_TCELL_UP                                   |                                  |                                  |     |
| 142                                                                 | 0.24267066                                                          | 1.0064074                        | 0.42207792                       |     |
| 0.48491895                                                          | 1                                                                   | 1443                             | "tags=13%, list=10%, signal=14%" |     |
| GSE5542_IFNG_VS_IFNA_AND_IFNG_TREATED_EPITHELIAL_CELLS_6H_DN        | GSE5542_IFNG_VS_IFNA_AND_IFNG_TREATED_EPITHELIAL_CELLS_6H_DN        |                                  |                                  |     |
| 147                                                                 | 0.24621776                                                          | 1.0061516                        | 0.44067797                       |     |
| 0.48536548                                                          | 1                                                                   | 2735                             | "tags=31%, list=19%, signal=38%" |     |
| GSE36476_YOUNG_VS_OLD_DONOR_MEMORY_CD4_TCELL_72H_TSST_ACT_UP        | GSE36476_YOUNG_VS_OLD_DONOR_MEMORY_CD4_TCELL_72H_TSST_ACT_UP        |                                  |                                  |     |
| 129                                                                 | 0.24763106                                                          | 1.005974                         | 0.43951613                       |     |
| 0.48560607                                                          | 1                                                                   | 1273                             | "tags=12%, list=9%, signal=13%"  |     |
| GSE3982_CENT_MEMORY_CD4_TCELL_VS_NKCELL_DN                          | GSE3982_CENT_MEMORY_CD4_TCELL_VS_NKCELL_DN                          |                                  |                                  |     |
|                                                                     |                                                                     |                                  | 142                              |     |
| 0.24162894                                                          | 1.0055226                                                           | 0.42417583                       | 0.48661023                       |     |
| 1                                                                   | 2132                                                                | "tags=20%, list=15%, signal=23%" |                                  |     |
| GSE2405_HEAT_KILLED_VS_LIVE_A_PHAGOCYTOPHILUM_STIM_NEUTROPHIL_9H_DN | GSE2405_HEAT_KILLED_VS_LIVE_A_PHAGOCYTOPHILUM_STIM_NEUTROPHIL_9H_DN |                                  |                                  |     |
| 146                                                                 | 0.2397845                                                           | 1.0052547                        | 0.4248927                        |     |
| 0.48708048                                                          | 1                                                                   | 777                              | "tags=10%, list=6%, signal=11%"  |     |
| GSE17721_CTRL_VS_GARDIQUIMOD_12H_BMDC_DN                            | GSE17721_CTRL_VS_GARDIQUIMOD_12H_BMDC_DN                            |                                  |                                  |     |
|                                                                     |                                                                     |                                  | 156                              |     |
| 0.24076763                                                          | 1.0052179                                                           | 0.42588726                       | 0.48697203                       |     |
| 1                                                                   | 1717                                                                | "tags=19%, list=12%, signal=21%" |                                  |     |
| GSE22025_UNTREATED_VS_TGFB1_AND_PROGESTERONE_TREATED_CD4_TCELL_DN   | GSE22025_UNTREATED_VS_TGFB1_AND_PROGESTERONE_TREATED_CD4_TCELL_DN   |                                  |                                  |     |
| 142                                                                 | 0.24318856                                                          | 1.0047028                        | 0.46526316                       |     |
| 0.48810393                                                          | 1                                                                   | 1709                             | "tags=14%, list=12%, signal=16%" |     |
| GSE2197_CPG_DNA_VS_UNTREATED_IN_DC_UP                               | GSE2197_CPG_DNA_VS_UNTREATED_IN_DC_UP                               |                                  |                                  |     |
|                                                                     |                                                                     |                                  | 155                              |     |
| 0.24006966                                                          | 1.0043375                                                           | 0.43067226                       | 0.4888692                        |     |
| 1                                                                   | 2707                                                                | "tags=31%, list=19%, signal=38%" |                                  |     |
| GSE360_L_MAJOR_VS_B_MALAYI_HIGH_DOSE_DC_DN                          | GSE360_L_MAJOR_VS_B_MALAYI_HIGH_DOSE_DC_DN                          |                                  |                                  |     |
|                                                                     |                                                                     |                                  | 142                              |     |
| 0.24407877                                                          | 1.0040689                                                           | 0.41093117                       | 0.4893761                        |     |
| 1                                                                   | 2604                                                                | "tags=28%, list=18%, signal=34%" |                                  |     |
| GSE360_DC_VS_MAC_B_MALAYI_LOW_DOSE_DN                               | GSE360_DC_VS_MAC_B_MALAYI_LOW_DOSE_DN                               |                                  |                                  |     |
|                                                                     |                                                                     |                                  | 157                              |     |
| 0.24133055                                                          | 1.0039872                                                           | 0.4731405                        | 0.48939395                       |     |
| 1                                                                   | 1741                                                                | "tags=21%, list=12%, signal=24%" |                                  |     |
| GSE1791_CTRL_VS_NEUROMEDINU_IN_T_CELL_LINE_0.8H_UP                  | GSE1791_CTRL_VS_NEUROMEDINU_IN_T_CELL_LINE_0.8H_UP                  |                                  |                                  |     |
|                                                                     |                                                                     |                                  |                                  | 127 |
| 0.24798962                                                          | 1.0036426                                                           | 0.45396146                       | 0.49008518                       |     |

|                                                             |            |                                                             |                                  |     |
|-------------------------------------------------------------|------------|-------------------------------------------------------------|----------------------------------|-----|
| 1                                                           | 1177       | "tags=13%, list=8%, signal=14%"                             |                                  |     |
| GSE360_DC_VS_MAC_UP                                         |            | GSE360_DC_VS_MAC_UP                                         |                                  | 135 |
| 0.24677931                                                  | 1.0036378  | 0.45010182                                                  | 0.4898991                        |     |
| 1                                                           | 1829       | "tags=21%, list=13%, signal=24%"                            |                                  |     |
| GSE16522_MEMORY_VS_NAIVE_CD8_TCELL_DN                       |            | GSE16522_MEMORY_VS_NAIVE_CD8_TCELL_DN                       |                                  | 142 |
| 0.2452761                                                   | 1.0036216  | 0.4328063                                                   | 0.4897402                        |     |
| 1                                                           | 1659       | "tags=17%, list=12%, signal=19%"                            |                                  |     |
| GSE8921_3H_VS_24H_TLR1_2_STIM_MONOCYTE_DN                   |            | GSE8921_3H_VS_24H_TLR1_2_STIM_MONOCYTE_DN                   |                                  | 143 |
| 0.24782121                                                  | 1.002748   | 0.4617068                                                   | 0.4917953                        | 1   |
| 2394                                                        |            | "tags=27%, list=17%, signal=33%"                            |                                  |     |
| GSE37301_LYMPHOID_PRIMED_MPP_VS_GRAN_MONO_PROGENITOR_UP     |            | GSE37301_LYMPHOID_PRIMED_MPP_VS_GRAN_MONO_PROGENITOR_UP     |                                  |     |
| 147                                                         | 0.2424463  | 1.0024893                                                   | 0.4265306                        |     |
| 0.49226967                                                  | 1          | 2420                                                        | "tags=31%, list=17%, signal=37%" |     |
| GSE24574_BCL6_HIGH_TFH_VS_TFH_CD4_TCELL_UP                  |            | GSE24574_BCL6_HIGH_TFH_VS_TFH_CD4_TCELL_UP                  |                                  | 128 |
| 0.24609968                                                  | 1.0024382  | 0.4453125                                                   | 0.49220628                       |     |
| 1                                                           | 1692       | "tags=17%, list=12%, signal=19%"                            |                                  |     |
| GSE16450_CTRL_VS_IFNA_12H_STIM_IMMATURE_NEURON_CELL_LINE_DN |            | GSE16450_CTRL_VS_IFNA_12H_STIM_IMMATURE_NEURON_CELL_LINE_DN |                                  |     |
| 117                                                         | 0.25029033 | 1.0013722                                                   | 0.4515464                        |     |
| 0.4947438                                                   | 1          | 1781                                                        | "tags=18%, list=13%, signal=20%" |     |
| GSE28726_NAIVE_VS_ACTIVATED_VA24NEG_NKTCELL_DN              |            | GSE28726_NAIVE_VS_ACTIVATED_VA24NEG_NKTCELL_DN              |                                  | 141 |
| 0.24515302                                                  | 1.0012052  | 0.4539749                                                   | 0.49496064                       |     |
| 1                                                           | 1228       | "tags=13%, list=9%, signal=14%"                             |                                  |     |
| GSE38696_LIGHT_ZONE_VS_DARK_ZONE_BCELL_UP                   |            | GSE38696_LIGHT_ZONE_VS_DARK_ZONE_BCELL_UP                   |                                  | 143 |
| 0.24253987                                                  | 1.0011648  | 0.42765957                                                  | 0.49486998                       |     |
| 1                                                           | 2458       | "tags=26%, list=17%, signal=31%"                            |                                  |     |
| GSE22025_UNTREATED_VS_PROGESTERONE_TREATED_CD4_TCELL_UP     |            | GSE22025_UNTREATED_VS_PROGESTERONE_TREATED_CD4_TCELL_UP     |                                  |     |
| 143                                                         | 0.24241033 | 1.0004976                                                   | 0.44347826                       |     |
| 0.49645683                                                  | 1          | 1403                                                        | "tags=12%, list=10%, signal=13%" |     |
| GSE3982_EOSINOPHIL_VS_NEUTROPHIL_DN                         |            | GSE3982_EOSINOPHIL_VS_NEUTROPHIL_DN                         |                                  | 133 |
| 0.24644299                                                  | 0.99938625 | 0.44                                                        | 0.49913314                       | 1   |
| 2043                                                        |            | "tags=20%, list=14%, signal=23%"                            |                                  |     |
| GSE27786_LSK_VS_MONO_MAC_UP                                 |            | GSE27786_LSK_VS_MONO_MAC_UP                                 |                                  |     |
| 130                                                         | 0.24262333 | 0.99936604                                                  | 0.45194274                       |     |
| 0.4989776                                                   | 1          | 2100                                                        | "tags=25%, list=15%, signal=30%" |     |
| GSE41978_WT_VS_BIM_KO_KLRG1_LOW_EFFECTOR_CD8_TCELL_DN       |            | GSE41978_WT_VS_BIM_KO_KLRG1_LOW_EFFECTOR_CD8_TCELL_DN       |                                  |     |
| 153                                                         | 0.24108289 | 0.99924433                                                  | 0.44698545                       |     |
| 0.49908906                                                  | 1          | 1749                                                        | "tags=19%, list=12%, signal=21%" |     |
| GSE30083_SP1_VS_SP4_THYMOCYTE_UP                            |            | GSE30083_SP1_VS_SP4_THYMOCYTE_UP                            |                                  |     |
| 164                                                         | 0.23655514 | 0.99858814                                                  | 0.46296296                       |     |
| 0.5006292                                                   | 1          | 1769                                                        | "tags=18%, list=13%, signal=21%" |     |
| GSE14000_4H_VS_16H_LPS_DC_TRANSLATED_RNA_DN                 |            | GSE14000_4H_VS_16H_LPS_DC_TRANSLATED_RNA_DN                 |                                  | 132 |
| 0.24474156                                                  | 0.9982684  | 0.4517544                                                   | 0.5012438                        |     |
| 1                                                           | 1034       | "tags=11%, list=7%, signal=12%"                             |                                  |     |

GSE2770\_IL12\_AND\_TGFB\_VS\_IL4\_TREATED\_ACT\_CD4\_TCELL\_48H\_DN  
GSE2770\_IL12\_AND\_TGFB\_VS\_IL4\_TREATED\_ACT\_CD4\_TCELL\_48H\_DN  
102 0.2532137 0.99819815 0.4649123  
0.5012408 1 1246 "tags=14%, list=9%, signal=15%"  
GSE15330\_WT\_VS\_IKAROS\_KO\_MEGAKARYOCYTE\_ERYTHROID\_PROGENITOR\_DN  
GSE15330\_WT\_VS\_IKAROS\_KO\_MEGAKARYOCYTE\_ERYTHROID\_PROGENITOR\_DN  
153 0.2406653 0.99738973 0.44591612  
0.503175 1 2724 "tags=31%, list=19%, signal=38%"  
GSE2770\_UNTREATED\_VS\_IL12\_TREATED\_ACT\_CD4\_TCELL\_48H\_DN  
GSE2770\_UNTREATED\_VS\_IL12\_TREATED\_ACT\_CD4\_TCELL\_48H\_DN  
144 0.23826852 0.9969308 0.45686275  
0.5042039 1 2463 "tags=22%, list=17%, signal=27%"  
GSE7548\_NAIVE\_VS\_DAY28\_PCC\_IMMUNIZATION\_CD4\_TCELL\_DN  
GSE7548\_NAIVE\_VS\_DAY28\_PCC\_IMMUNIZATION\_CD4\_TCELL\_DN  
141 0.24283776 0.99671483 0.47599164  
0.5045788 1 1280 "tags=13%, list=9%, signal=15%"  
GSE21927\_UNTREATED\_VS\_GMCSF\_IL6\_TREATED\_BONE\_MARROW\_DN  
GSE21927\_UNTREATED\_VS\_GMCSF\_IL6\_TREATED\_BONE\_MARROW\_DN  
114 0.24675559 0.9965324 0.40963855  
0.5048647 1 2380 "tags=25%, list=17%, signal=30%"  
GSE3982\_BCELL\_VS\_CENT\_MEMORY\_CD4\_TCELL\_DN  
GSE3982\_BCELL\_VS\_CENT\_MEMORY\_CD4\_TCELL\_DN 125  
0.24592471 0.99387693 0.46875 0.5116146 1  
1672 "tags=17%, list=12%, signal=19%"  
GSE32533\_WT\_VS\_MIR17\_OVEREXPRESS\_ACT\_CD4\_TCELL\_UP  
GSE32533\_WT\_VS\_MIR17\_OVEREXPRESS\_ACT\_CD4\_TCELL\_UP 138  
0.24225567 0.99330467 0.46090534 0.5128859  
1 2296 "tags=28%, list=16%, signal=33%"  
GSE24634\_TEFF\_VS\_TCONV\_DAY10\_IN\_CULTURE\_DN  
GSE24634\_TEFF\_VS\_TCONV\_DAY10\_IN\_CULTURE\_DN 159  
0.2368831 0.99327976 0.45510203 0.5127482  
1 1912 "tags=20%, list=14%, signal=23%"  
GSE13229\_IMM\_VS\_MATURE\_NKCELL\_DN GSE13229\_IMM\_VS\_MATURE\_NKCELL\_DN  
142 0.24293752 0.9916652 0.4474273  
0.5168482 1 1776 "tags=21%, list=13%, signal=24%"  
GSE3982\_MAST\_CELL\_VS\_BASOPHIL\_UP GSE3982\_MAST\_CELL\_VS\_BASOPHIL\_UP  
139 0.24214976 0.99129856 0.47921225  
0.5176507 1 3188 "tags=35%, list=23%, signal=45%"  
GSE15930\_STIM\_VS\_STIM\_AND\_IFNAB\_24H\_CD8\_T\_CELL\_DN  
GSE15930\_STIM\_VS\_STIM\_AND\_IFNAB\_24H\_CD8\_T\_CELL\_DN 154  
0.23773947 0.9906716 0.49385247 0.51909554  
1 2663 "tags=29%, list=19%, signal=35%"  
GSE3982\_DC\_VS\_BCELL\_UP GSE3982\_DC\_VS\_BCELL\_UP 159  
0.23876627 0.9905387 0.47895792 0.51922876  
1 1279 "tags=11%, list=9%, signal=12%"  
GSE29618\_MONOCYTE\_VS\_PDC\_DN GSE29618\_MONOCYTE\_VS\_PDC\_DN  
141 0.24204528 0.98874086 0.47686118  
0.52384245 1 1900 "tags=22%, list=13%, signal=25%"  
GSE9960\_HEALTHY\_VS\_GRAM\_NEG\_AND\_POS\_SEPSIS\_PBMC\_DN  
GSE9960\_HEALTHY\_VS\_GRAM\_NEG\_AND\_POS\_SEPSIS\_PBMC\_DN 114  
0.24678873 0.98792577 0.46055436 0.52582157  
1 1794 "tags=20%, list=13%, signal=23%"  
GSE1460\_CD4\_THYMOCYTE\_VS\_THYMIC\_STROMAL\_CELL\_DN  
GSE1460\_CD4\_THYMOCYTE\_VS\_THYMIC\_STROMAL\_CELL\_DN 146

|                                                               |                                                               |                                  |                                  |
|---------------------------------------------------------------|---------------------------------------------------------------|----------------------------------|----------------------------------|
| 0.24023817                                                    | 0.98745316                                                    | 0.47722772                       | 0.52686256                       |
| 1                                                             | 2276                                                          | "tags=25%, list=16%, signal=30%" |                                  |
| GSE11924_TFH_VS_TH2_CD4_TCELL_UP                              | GSE11924_TFH_VS_TH2_CD4_TCELL_UP                              |                                  |                                  |
| 142                                                           | 0.23817123                                                    | 0.987012                         | 0.5031447                        |
| 0.5278374                                                     | 1                                                             | 2379                             | "tags=27%, list=17%, signal=32%" |
| GSE42021_TREG_PLN_VS_TREG_PRECURSORS_THYMUS_UP                | GSE42021_TREG_PLN_VS_TREG_PRECURSORS_THYMUS_UP                |                                  | 130                              |
| 0.24292767                                                    | 0.98686993                                                    | 0.46169356                       | 0.52800155                       |
| 1                                                             | 1585                                                          | "tags=14%, list=11%, signal=15%" |                                  |
| GSE41867_DAY8_VS_DAY15_LCMV_ARMSTRONG_EFFECTOR_CD8_TCELL_UP   | GSE41867_DAY8_VS_DAY15_LCMV_ARMSTRONG_EFFECTOR_CD8_TCELL_UP   |                                  |                                  |
| 100                                                           | 0.25209916                                                    | 0.98630154                       | 0.47619048                       |
| 0.52931684                                                    | 1                                                             | 1048                             | "tags=8%, list=7%, signal=9%"    |
| GSE22886_IGG_IGA_MEMORY_BCELL_VS_BM_PLASMA_CELL_DN            | GSE22886_IGG_IGA_MEMORY_BCELL_VS_BM_PLASMA_CELL_DN            |                                  | 145                              |
| 0.24016926                                                    | 0.98626065                                                    | 0.49790794                       | 0.52921706                       |
| 1                                                             | 2148                                                          | "tags=24%, list=15%, signal=28%" |                                  |
| GSE18281_CORTEX_VS_MEDULLA_THYMUS_UP                          | GSE18281_CORTEX_VS_MEDULLA_THYMUS_UP                          |                                  | 125                              |
| 0.24306023                                                    | 0.9857535                                                     | 0.4767677                        | 0.5303571                        |
| 1                                                             | 1204                                                          | "tags=10%, list=9%, signal=11%"  |                                  |
| GSE3203_HEALTHY_VS_INFLUENZA_INFECTED_LN_BCELL_UP             | GSE3203_HEALTHY_VS_INFLUENZA_INFECTED_LN_BCELL_UP             |                                  | 147                              |
| 0.2373218                                                     | 0.98574173                                                    | 0.49785408                       | 0.53017825                       |
| 1                                                             | 1990                                                          | "tags=22%, list=14%, signal=25%" |                                  |
| GSE17721_CTRL_VS_LPS_8H_BMDC_DN                               | GSE17721_CTRL_VS_LPS_8H_BMDC_DN                               |                                  |                                  |
| 160                                                           | 0.23376967                                                    | 0.9855731                        | 0.51521736                       |
| 0.53042316                                                    | 1                                                             | 1553                             | "tags=16%, list=11%, signal=17%" |
| GSE1460_NAIVE_CD4_TCELL_ADULT_BLOOD_VS_THYMIC_STROMAL_CELL_UP | GSE1460_NAIVE_CD4_TCELL_ADULT_BLOOD_VS_THYMIC_STROMAL_CELL_UP |                                  |                                  |
| 131                                                           | 0.23970224                                                    | 0.98531                          | 0.5                              |
| 0.5309098                                                     | 1                                                             | 2283                             | "tags=24%, list=16%, signal=28%" |
| GSE5099_UNSTIM_VS_MCSF_TREATED_MONOCYTE_DAY7_DN               | GSE5099_UNSTIM_VS_MCSF_TREATED_MONOCYTE_DAY7_DN               |                                  | 144                              |
| 0.24001239                                                    | 0.98526835                                                    | 0.48347107                       | 0.5308046                        |
| 1                                                             | 1810                                                          | "tags=22%, list=13%, signal=24%" |                                  |
| GSE21546_UNSTIM_VS_ANTI_CD3_STIM_ELK1_KO_DP_THYMOCYTES_UP     | GSE21546_UNSTIM_VS_ANTI_CD3_STIM_ELK1_KO_DP_THYMOCYTES_UP     |                                  |                                  |
| 107                                                           | 0.2474836                                                     | 0.9848181                        | 0.48247424                       |
| 0.53178436                                                    | 1                                                             | 2419                             | "tags=25%, list=17%, signal=30%" |
| GSE1925_CTRL_VS_3H_IFNG_STIM_IFNG_PRIMED_MACROPHAGE_UP        | GSE1925_CTRL_VS_3H_IFNG_STIM_IFNG_PRIMED_MACROPHAGE_UP        |                                  |                                  |
| 122                                                           | 0.24269806                                                    | 0.98445195                       | 0.4893617                        |
| 0.5325325                                                     | 1                                                             | 2423                             | "tags=26%, list=17%, signal=31%" |
| GSE24142_ADULT_VS_FETAL_DN2_THYMOCYTE_DN                      | GSE24142_ADULT_VS_FETAL_DN2_THYMOCYTE_DN                      |                                  | 154                              |
| 0.23690033                                                    | 0.98426896                                                    | 0.46638656                       | 0.5327941                        |
| 1                                                             | 2359                                                          | "tags=23%, list=17%, signal=28%" |                                  |
| GSE29949_CD8_NEG_DC_SPLEEN_VS_CD8_POS_DC_SPLEEN_DN            | GSE29949_CD8_NEG_DC_SPLEEN_VS_CD8_POS_DC_SPLEEN_DN            |                                  | 142                              |
| 0.23872335                                                    | 0.98352295                                                    | 0.47975707                       | 0.53457063                       |
| 1                                                             | 2149                                                          | "tags=22%, list=15%, signal=25%" |                                  |
| GSE22611_UNSTIM_VS_6H_MDP_STIM_MUTANT_NOD2_TRANSDUCE          | GSE22611_UNSTIM_VS_6H_MDP_STIM_MUTANT_NOD2_TRANSDUCE          |                                  |                                  |
| HEK293T_CELL_DN                                               |                                                               |                                  |                                  |

GSE22611\_UNSTIM\_VS\_6H\_MDP\_STIM\_MUTANT\_NOD2\_TRANSDUCED\_HEK293T\_CELL\_D  
N 134 0.24187998 0.9831296  
0.47510374 0.5353976 1 2607 "tags=24%,  
list=18%, signal=29%"  
GSE6259\_FLT3L\_INDUCED\_DEC205\_POS\_DC\_VS\_CD8\_TCELL\_UP  
GSE6259\_FLT3L\_INDUCED\_DEC205\_POS\_DC\_VS\_CD8\_TCELL\_UP  
111 0.2498858 0.9828432 0.50429183  
0.5359349 1 1904 "tags=22%, list=13%, signal=25%"  
GSE29164\_DAY3\_VS\_DAY7\_UNTREATED\_MELANOMA\_DN  
GSE29164\_DAY3\_VS\_DAY7\_UNTREATED\_MELANOMA\_DN 153  
0.23538028 0.9826007 0.5031315 0.5363882  
1 2533 "tags=25%, list=18%, signal=31%"  
GSE24671\_CTRL\_VS\_SENDAI\_VIRUS\_INFECTED\_MOUSE\_SPLENOCYTES\_DN  
GSE24671\_CTRL\_VS\_SENDAI\_VIRUS\_INFECTED\_MOUSE\_SPLENOCYTES\_DN  
135 0.23896597 0.98224306 0.4891775  
0.5370915 1 2045 "tags=22%, list=14%, signal=26%"  
GSE9006\_1MONTH\_VS\_4MONTH\_POST\_TYPE\_1\_DIABETES\_DX\_PBMC\_DN  
GSE9006\_1MONTH\_VS\_4MONTH\_POST\_TYPE\_1\_DIABETES\_DX\_PBMC\_DN  
133 0.23859504 0.9816511 0.48806942  
0.53843784 1 1811 "tags=15%, list=13%, signal=17%"  
GSE1791\_CTRL\_VS\_NEUROMEDINU\_IN\_T\_CELL\_LINE\_12H\_UP  
GSE1791\_CTRL\_VS\_NEUROMEDINU\_IN\_T\_CELL\_LINE\_12H\_UP 132  
0.24269088 0.9812335 0.4851695 0.53935903  
1 2593 "tags=31%, list=18%, signal=38%"  
GSE29615\_CTRL\_VS\_DAY7\_LAIV\_FLU\_VACCINE\_PBMC\_UP  
GSE29615\_CTRL\_VS\_DAY7\_LAIV\_FLU\_VACCINE\_PBMC\_UP 106  
0.24978374 0.9808374 0.48187634 0.54022187  
1 1866 "tags=14%, list=13%, signal=16%"  
GSE27786\_ERYTHROBLAST\_VS\_NEUTROPHIL\_DN  
GSE27786\_ERYTHROBLAST\_VS\_NEUTROPHIL\_DN 147  
0.23896083 0.9808338 0.49686846 0.5400133  
1 2953 "tags=32%, list=21%, signal=40%"  
GSE37605\_C57BL6\_VS\_NOD\_FOXP3\_FUSION\_GFP\_TCONV\_UP  
GSE37605\_C57BL6\_VS\_NOD\_FOXP3\_FUSION\_GFP\_TCONV\_UP 136  
0.241471 0.98079735 0.51914895 0.53989995 1  
1516 "tags=19%, list=11%, signal=21%"  
GSE3982\_CENT\_MEMORY\_CD4\_TCELL\_VS\_NKCELL\_UP  
GSE3982\_CENT\_MEMORY\_CD4\_TCELL\_VS\_NKCELL\_UP 125  
0.24310787 0.98018587 0.46696034 0.54130065  
1 1092 "tags=13%, list=8%, signal=14%"  
GSE29618\_PRE\_VS\_DAY7\_POST\_TIV\_FLU\_VACCINE\_PDC\_UP  
GSE29618\_PRE\_VS\_DAY7\_POST\_TIV\_FLU\_VACCINE\_PDC\_UP 129  
0.24344862 0.9785165 0.52663934 0.5455468  
1 1927 "tags=16%, list=14%, signal=19%"  
GSE21927\_SPLEEN\_MONOCYTE\_VS\_GMCSF\_GCSF\_BONE\_MARROW\_UP  
GSE21927\_SPLEEN\_MONOCYTE\_VS\_GMCSF\_GCSF\_BONE\_MARROW\_UP  
100 0.248018 0.97849005 0.49795082 0.54539096  
1 1667 "tags=19%, list=12%, signal=21%"  
GSE34205\_HEALTHY\_VS\_FLU\_INF\_INFANT\_PBMC\_UP  
GSE34205\_HEALTHY\_VS\_FLU\_INF\_INFANT\_PBMC\_UP 105  
0.24898092 0.9778659 0.4896694 0.546829 1  
1891 "tags=20%, list=13%, signal=23%"  
GSE43863\_DAY6\_EFF\_VS\_DAY150\_MEM\_TFH\_CD4\_TCELL\_DN  
GSE43863\_DAY6\_EFF\_VS\_DAY150\_MEM\_TFH\_CD4\_TCELL\_DN 143

|                                                                   |            |                                  |                                  |
|-------------------------------------------------------------------|------------|----------------------------------|----------------------------------|
| 0.23690508                                                        | 0.9777323  | 0.50213677                       | 0.54697585                       |
| 1                                                                 | 1559       | "tags=16%, list=11%, signal=18%" |                                  |
| GSE22886_NAIVE_CD4_TCELL_VS_MEMORY_TCELL_UP                       |            |                                  |                                  |
| GSE22886_NAIVE_CD4_TCELL_VS_MEMORY_TCELL_UP                       |            |                                  | 135                              |
| 0.23671435                                                        | 0.97692305 | 0.47021276                       | 0.54899025                       |
| 1                                                                 | 1355       | "tags=11%, list=10%, signal=12%" |                                  |
| GSE22935_UNSTIM_VS_24H_MBOVIS_BCG_STIM_MACROPHAGE_DN              |            |                                  |                                  |
| GSE22935_UNSTIM_VS_24H_MBOVIS_BCG_STIM_MACROPHAGE_DN              |            |                                  |                                  |
| 157                                                               | 0.23397577 | 0.9768046                        | 0.50993377                       |
| 0.54911363                                                        | 1          | 1810                             | "tags=18%, list=13%, signal=21%" |
| GSE21546_UNSTIM_VS_ANTI_CD3_STIM_ELK1_KO_DP_THYMOCYTES_DN         |            |                                  |                                  |
| GSE21546_UNSTIM_VS_ANTI_CD3_STIM_ELK1_KO_DP_THYMOCYTES_DN         |            |                                  |                                  |
| 112                                                               | 0.24384576 | 0.9758042                        | 0.50931674                       |
| 0.55164576                                                        | 1          | 1665                             | "tags=15%, list=12%, signal=17%" |
| GSE9946_MATURE_STIMULATORY_VS_LISTERIA_INF_MATURE_DC_UP           |            |                                  |                                  |
| GSE9946_MATURE_STIMULATORY_VS_LISTERIA_INF_MATURE_DC_UP           |            |                                  |                                  |
| 101                                                               | 0.25290772 | 0.97443634                       | 0.5171026                        |
| 0.5551664                                                         | 1          | 2342                             | "tags=26%, list=17%, signal=31%" |
| GSE17721_PAM3CSK4_VS_CPG_2H_BMDC_DN                               |            |                                  |                                  |
| GSE17721_PAM3CSK4_VS_CPG_2H_BMDC_DN                               |            |                                  | 151                              |
| 0.23747805                                                        | 0.97316295 | 0.5338983                        | 0.55837315                       |
| 1                                                                 | 2079       | "tags=21%, list=15%, signal=25%" |                                  |
| GSE2770_IL12_AND_TGFB_ACT_VS_ACT_CD4_TCELL_48H_UP                 |            |                                  |                                  |
| GSE2770_IL12_AND_TGFB_ACT_VS_ACT_CD4_TCELL_48H_UP                 |            |                                  | 130                              |
| 0.23903868                                                        | 0.9730637  | 0.50718683                       | 0.5584273                        |
| 1                                                                 | 2286       | "tags=24%, list=16%, signal=28%" |                                  |
| GSE11961_PLASMA_CELL_DAY7_VS_MEMORY_BCELL_DAY40_DN                |            |                                  |                                  |
| GSE11961_PLASMA_CELL_DAY7_VS_MEMORY_BCELL_DAY40_DN                |            |                                  | 143                              |
| 0.23560536                                                        | 0.9727886  | 0.49900597                       | 0.55892795                       |
| 1                                                                 | 741        | "tags=7%, list=5%, signal=7%"    |                                  |
| GSE26727_WT_VS_KLF2_KO_LPS_STIM_MACROPHAGE_UP                     |            |                                  |                                  |
| GSE26727_WT_VS_KLF2_KO_LPS_STIM_MACROPHAGE_UP                     |            |                                  | 149                              |
| 0.2357847                                                         | 0.9723429  | 0.52272725                       | 0.55988467                       |
| 1                                                                 | 2121       | "tags=22%, list=15%, signal=26%" |                                  |
| GSE24102_GRANULOCYSTITIC_MDSC_VS_NEUTROPHIL_DN                    |            |                                  |                                  |
| GSE24102_GRANULOCYSTITIC_MDSC_VS_NEUTROPHIL_DN                    |            |                                  | 148                              |
| 0.2351896                                                         | 0.9722506  | 0.5346535                        | 0.55991846                       |
| 1                                                                 | 2018       | "tags=22%, list=14%, signal=26%" |                                  |
| GSE360_L_MAJOR_VS_B_MALAYI_HIGH_DOSE_DC_UP                        |            |                                  |                                  |
| GSE360_L_MAJOR_VS_B_MALAYI_HIGH_DOSE_DC_UP                        |            |                                  | 156                              |
| 0.23406866                                                        | 0.9718465  | 0.52904564                       | 0.56082153                       |
| 1                                                                 | 2186       | "tags=20%, list=15%, signal=23%" |                                  |
| GSE37532_VISCERAL_ADIPOSE_TISSUE_VS_LN_DERIVED_TCONV_CD4_TCELL_UP |            |                                  |                                  |
| GSE37532_VISCERAL_ADIPOSE_TISSUE_VS_LN_DERIVED_TCONV_CD4_TCELL_UP |            |                                  |                                  |
| 92                                                                | 0.25636455 | 0.9717751                        | 0.5010482                        |
| 0.56077445                                                        | 1          | 1705                             | "tags=14%, list=12%, signal=16%" |
| GSE6566_STRONG_VS_WEAK_DC_STIMULATED_CD4_TCELL_DN                 |            |                                  |                                  |
| GSE6566_STRONG_VS_WEAK_DC_STIMULATED_CD4_TCELL_DN                 |            |                                  | 115                              |
| 0.24338585                                                        | 0.9713629  | 0.5                              | 0.56169885                       |
| 2749                                                              |            | "tags=29%, list=19%, signal=35%" | 1                                |
| GSE20715_WT_VS_TLR4_KO_24H_OZONE_LUNG_UP                          |            |                                  |                                  |
| GSE20715_WT_VS_TLR4_KO_24H_OZONE_LUNG_UP                          |            |                                  | 159                              |
| 0.23264372                                                        | 0.97014827 | 0.51508623                       | 0.5647793                        |
| 1                                                                 | 1644       | "tags=17%, list=12%, signal=19%" |                                  |

|                                                                     |                                   |                                  |                                  |            |
|---------------------------------------------------------------------|-----------------------------------|----------------------------------|----------------------------------|------------|
| GSE45365_NK_CELL_VS_BCELL_MCMV_INFECTION_UP                         |                                   |                                  |                                  |            |
| GSE45365_NK_CELL_VS_BCELL_MCMV_INFECTION_UP                         |                                   |                                  |                                  | 144        |
| 0.23556127                                                          | 0.9695811                         | 0.52699786                       |                                  | 0.56607705 |
| 1                                                                   | 2532                              | "tags=30%, list=18%, signal=36%" |                                  |            |
| GSE17186_MEMORY_VS_CD21LOW_TRANSITIONAL_BCELL_DN                    |                                   |                                  |                                  | 145        |
| GSE17186_MEMORY_VS_CD21LOW_TRANSITIONAL_BCELL_DN                    |                                   |                                  |                                  | 145        |
| 0.23480295                                                          | 0.9695108                         | 0.5373737                        |                                  | 0.56603885 |
| 1                                                                   | 2576                              | "tags=26%, list=18%, signal=32%" |                                  |            |
| GSE12507_PDC_CELL_LINE_VS_IMMATURE_T_CELL_LINE_DN                   |                                   |                                  |                                  | 109        |
| GSE12507_PDC_CELL_LINE_VS_IMMATURE_T_CELL_LINE_DN                   |                                   |                                  |                                  | 109        |
| 0.24495046                                                          | 0.9686525                         | 0.5106383                        |                                  | 0.56816185 |
| 1                                                                   | 2486                              | "tags=18%, list=18%, signal=22%" |                                  |            |
| GSE41867_DAY6_EFFECTOR_VS_DAY30_EXHAUSTED_CD8_TCELL_LCMV_CLONE13_DN |                                   |                                  |                                  |            |
| GSE41867_DAY6_EFFECTOR_VS_DAY30_EXHAUSTED_CD8_TCELL_LCMV_CLONE13_DN |                                   |                                  |                                  |            |
|                                                                     | 144                               | 0.23495315                       | 0.9683591                        | 0.5482546  |
| 0.5687345                                                           | 1                                 | 2704                             | "tags=28%, list=19%, signal=34%" |            |
| GSE2770_UNTREATED_VS_TGFB_AND_IL4_TREATED_ACT_CD4_TCELL_4H_DN       |                                   |                                  |                                  |            |
| GSE2770_UNTREATED_VS_TGFB_AND_IL4_TREATED_ACT_CD4_TCELL_4H_DN       |                                   |                                  |                                  |            |
|                                                                     | 92                                | 0.253711                         | 0.96730804                       | 0.51555556 |
| 0.57140636                                                          | 1                                 | 1578                             | "tags=17%, list=11%, signal=19%" |            |
| GSE36888_UNTREATED_VS_IL2_TREATED_STAT5_AB_KNOCKIN_TCELL_17H_UP     |                                   |                                  |                                  |            |
| GSE36888_UNTREATED_VS_IL2_TREATED_STAT5_AB_KNOCKIN_TCELL_17H_UP     |                                   |                                  |                                  |            |
|                                                                     | 136                               | 0.23487216                       | 0.9671966                        | 0.5540541  |
| 0.5714766                                                           | 1                                 | 949                              | "tags=11%, list=7%, signal=12%"  |            |
| GSE13485_CTRL_VS_DAY7_YF17D_VACCINE_PBMC_UP                         |                                   |                                  |                                  |            |
| GSE13485_CTRL_VS_DAY7_YF17D_VACCINE_PBMC_UP                         |                                   |                                  |                                  | 105        |
| 0.25195214                                                          | 0.96643925                        | 0.51843816                       |                                  | 0.5733815  |
| 1                                                                   | 2499                              | "tags=24%, list=18%, signal=29%" |                                  |            |
| GSE17721_POLYIC_VS_CPG_2H_BMDC_DN                                   | GSE17721_POLYIC_VS_CPG_2H_BMDC_DN |                                  |                                  |            |
|                                                                     | 158                               | 0.23381558                       | 0.96587527                       | 0.5482546  |
| 0.57472825                                                          | 1                                 | 1594                             | "tags=14%, list=11%, signal=16%" |            |
| GSE3039_NKT_CELL_VS_B1_BCELL_UP                                     | GSE3039_NKT_CELL_VS_B1_BCELL_UP   |                                  |                                  |            |
|                                                                     | 142                               | 0.23315431                       | 0.96509665                       | 0.5433404  |
| 0.5766211                                                           | 1                                 | 2204                             | "tags=21%, list=16%, signal=25%" |            |
| GSE22140_GERMFREE_VS_SPF_ARTHRITIC_MOUSE_CD4_TCELL_UP               |                                   |                                  |                                  |            |
| GSE22140_GERMFREE_VS_SPF_ARTHRITIC_MOUSE_CD4_TCELL_UP               |                                   |                                  |                                  |            |
|                                                                     | 146                               | 0.23656432                       | 0.9634265                        | 0.54471546 |
| 0.5810496                                                           | 1                                 | 2420                             | "tags=29%, list=17%, signal=34%" |            |
| GSE13411_IGM_VS_SWITCHED_MEMORY_BCELL_DN                            |                                   |                                  |                                  |            |
| GSE13411_IGM_VS_SWITCHED_MEMORY_BCELL_DN                            |                                   |                                  |                                  | 136        |
| 0.23510417                                                          | 0.9626719                         | 0.55949897                       |                                  | 0.5829147  |
| 1                                                                   | 2292                              | "tags=26%, list=16%, signal=30%" |                                  |            |
| GSE9509_10MIN_VS_30MIN_LPS_AND_IL10_STIM_IL10_KO_MACROPHAGE_DN      |                                   |                                  |                                  |            |
| GSE9509_10MIN_VS_30MIN_LPS_AND_IL10_STIM_IL10_KO_MACROPHAGE_DN      |                                   |                                  |                                  |            |
|                                                                     | 126                               | 0.23818                          | 0.9624345                        | 0.52953154 |
| 0.5832955                                                           | 1                                 | 2047                             | "tags=18%, list=15%, signal=21%" |            |
| GSE3691_IFN_PRODUCING_KILLER_DC_VS_CONVENTIONAL_DC_SPLEEN_DN        |                                   |                                  |                                  |            |
| GSE3691_IFN_PRODUCING_KILLER_DC_VS_CONVENTIONAL_DC_SPLEEN_DN        |                                   |                                  |                                  |            |
|                                                                     | 153                               | 0.22671153                       | 0.960796                         | 0.5588865  |
| 0.58763725                                                          | 1                                 | 1689                             | "tags=12%, list=12%, signal=14%" |            |
| GSE17721_CTRL_VS_GARDIQUIMOD_2H_BMDC_UP                             |                                   |                                  |                                  |            |
| GSE17721_CTRL_VS_GARDIQUIMOD_2H_BMDC_UP                             |                                   |                                  |                                  | 136        |
| 0.23556997                                                          | 0.9601556                         | 0.5673913                        |                                  | 0.5891528  |
| 1                                                                   | 1876                              | "tags=21%, list=13%, signal=24%" |                                  |            |



GSE3982\_BCELL\_VS\_NKCELL\_DN                    GSE3982\_BCELL\_VS\_NKCELL\_DN  
                  143            0.23226334                    0.9599672                    0.5588235  
0.5893988                    1                    2235                    "tags=15%, list=16%, signal=18%"  
GSE27786\_CD4\_TCELL\_VS\_NEUTROPHIL\_UP  
GSE27786\_CD4\_TCELL\_VS\_NEUTROPHIL\_UP                    141  
0.23348244                    0.9595971                    0.56962025                    0.5901772  
1                    2345                    "tags=26%, list=17%, signal=30%"  
GSE21927\_EL4\_VS\_MCA203\_TUMOR\_MONOCYTES\_DN  
GSE21927\_EL4\_VS\_MCA203\_TUMOR\_MONOCYTES\_DN                    111  
0.24304557                    0.95629007                    0.53218883                    0.5990888  
1                    1122                    "tags=12%, list=8%, signal=13%"  
GSE5589\_LPS\_VS\_LPS\_AND\_IL6\_STIM\_IL10\_KO\_MACROPHAGE\_45MIN\_UP  
GSE5589\_LPS\_VS\_LPS\_AND\_IL6\_STIM\_IL10\_KO\_MACROPHAGE\_45MIN\_UP  
140                    0.23071063                    0.95575315                    0.5670103  
0.6003769                    1                    1725                    "tags=12%, list=12%, signal=14%"  
GSE46606\_UNSTIM\_VS\_CD40L\_IL2\_IL5\_3DAY\_STIMULATED\_IRF4HIGH\_SORTED\_BCE  
LL\_UP  
GSE46606\_UNSTIM\_VS\_CD40L\_IL2\_IL5\_3DAY\_STIMULATED\_IRF4HIGH\_SORTED\_BCE  
LL\_UP                    138                    0.23308527                    0.95499605  
0.5641548                    0.6022753                    1                    1797                    "tags=17%,  
list=13%, signal=19%"  
GSE41867\_DAY15\_EFFECTOR\_VS\_DAY30\_EXHAUSTED\_CD8\_TCELL\_LCMV\_CLONE13\_DN  
  
GSE41867\_DAY15\_EFFECTOR\_VS\_DAY30\_EXHAUSTED\_CD8\_TCELL\_LCMV\_CLONE13\_DN  
                  129                    0.23255241                    0.9548511  
0.5807128                    0.6024259                    1                    2222                    "tags=24%,  
list=16%, signal=28%"  
GSE18893\_CTRL\_VS\_TNF\_TREATED\_TCONV\_24H\_UP  
GSE18893\_CTRL\_VS\_TNF\_TREATED\_TCONV\_24H\_UP                    131  
0.23228979                    0.9545389                    0.58239275                    0.60305375  
1                    2587                    "tags=26%, list=18%, signal=31%"  
GSE17721\_12H\_VS\_24H\_CPG\_BMDC\_UP                    GSE17721\_12H\_VS\_24H\_CPG\_BMDC\_UP  
                  156                    0.22763973                    0.9537538                    0.5809129  
0.6049802                    1                    2441                    "tags=24%, list=17%, signal=28%"  
GSE11864\_CSF1\_IFNG\_VS\_CSF1\_PAM3CYS\_IN\_MAC\_DN  
GSE11864\_CSF1\_IFNG\_VS\_CSF1\_PAM3CYS\_IN\_MAC\_DN                    132  
0.2359824                    0.95259494                    0.57836646                    0.60793823  
1                    2469                    "tags=27%, list=17%, signal=32%"  
GSE360\_L\_DONOVANI\_VS\_L\_MAJOR\_DC\_UP  
GSE360\_L\_DONOVANI\_VS\_L\_MAJOR\_DC\_UP                    150  
0.22991413                    0.95252436                    0.59381443                    0.60789007  
1                    2779                    "tags=27%, list=20%, signal=33%"  
GSE17721\_0.5H\_VS\_12H\_PAM3CSK4\_BMDC\_UP  
GSE17721\_0.5H\_VS\_12H\_PAM3CSK4\_BMDC\_UP                    146  
0.22952712                    0.95167935                    0.58913046                    0.60998267  
1                    2595                    "tags=27%, list=18%, signal=32%"  
GSE34156\_NOD2\_LIGAND\_VS\_NOD2\_AND\_TLR1\_TLR2\_LIGAND\_6H\_TREATED\_MONOCYT  
E\_DN  
GSE34156\_NOD2\_LIGAND\_VS\_NOD2\_AND\_TLR1\_TLR2\_LIGAND\_6H\_TREATED\_MONOCYT  
E\_DN                    160                    0.22696097                    0.9515959  
0.58178055                    0.60998005                    1                    1687                    "tags=16%,  
list=12%, signal=18%"  
GSE2405\_HEAT\_KILLED\_VS\_LIVE\_A\_PHAGOCYTOPHILUM\_STIM\_NEUTROPHIL\_24H\_DN

GSE2405\_HEAT\_KILLED\_VS\_LIVE\_A\_PHAGOCYTOPHILUM\_STIM\_NEUTROPHIL\_24H\_DN  
 129 0.2356316 0.95156467  
 0.5835141 0.60982746 1 1169 "tags=12%,  
 list=8%, signal=13%"  
 GSE17721\_PAM3CSK4\_VS\_CPG\_2H\_BMDC\_UP  
 GSE17721\_PAM3CSK4\_VS\_CPG\_2H\_BMDC\_UP 155  
 0.22754028 0.9514876 0.5585774 0.609798 1  
 1893 "tags=18%, list=13%, signal=21%"  
 GSE24972\_MARGINAL\_ZONE\_BCELL\_VS\_FOLLICULAR\_BCELL\_DN  
 GSE24972\_MARGINAL\_ZONE\_BCELL\_VS\_FOLLICULAR\_BCELL\_DN  
 142 0.229405 0.9514305 0.57758623 0.6097271  
 1 1390 "tags=12%, list=10%, signal=13%"  
 GSE29615\_CTRL\_VS\_DAY3\_LAIV\_IFLU\_VACCINE\_PBMC\_DN  
 GSE29615\_CTRL\_VS\_DAY3\_LAIV\_IFLU\_VACCINE\_PBMC\_DN 118  
 0.2343008 0.9508272 0.5609756 0.611201 1  
 2716 "tags=28%, list=19%, signal=34%"  
 GSE6269\_E\_COLI\_VS\_STREP\_PNEUMO\_INF\_PBMC\_UP  
 GSE6269\_E\_COLI\_VS\_STREP\_PNEUMO\_INF\_PBMC\_UP 120  
 0.23859377 0.9503826 0.5619469 0.6121724  
 1 1703 "tags=17%, list=12%, signal=19%"  
 GSE3982\_MAST\_CELL\_VS\_NEUTROPHIL\_DN  
 GSE3982\_MAST\_CELL\_VS\_NEUTROPHIL\_DN 143  
 0.22975361 0.9498848 0.55693585 0.6132716  
 1 2422 "tags=22%, list=17%, signal=27%"  
 GSE5099\_MONOCYTE\_VS\_ALTERNATIVE\_M2\_MACROPHAGE\_UP  
 GSE5099\_MONOCYTE\_VS\_ALTERNATIVE\_M2\_MACROPHAGE\_UP 106  
 0.23775792 0.94841444 0.5705394 0.61708283  
 1 1703 "tags=14%, list=12%, signal=16%"  
 GSE26488\_HDAC7\_KO\_VS\_VP16\_TRANSGENIC\_HDAC7\_KO\_DOUBLE\_POSITIVE\_THYMOC  
 YTE\_DN  
 GSE26488\_HDAC7\_KO\_VS\_VP16\_TRANSGENIC\_HDAC7\_KO\_DOUBLE\_POSITIVE\_THYMOC  
 YTE\_DN 160 0.22687034 0.94785786  
 0.5615551 0.6184387 1 2041 "tags=19%,  
 list=14%, signal=22%"  
 GSE5503\_LIVER\_DC\_VS\_PLN\_DC\_ACTIVATED\_ALLOGENIC\_TCELL\_DN  
 GSE5503\_LIVER\_DC\_VS\_PLN\_DC\_ACTIVATED\_ALLOGENIC\_TCELL\_DN  
 148 0.2265854 0.94774795 0.5884692  
 0.61849874 1 2760 "tags=27%, list=20%, signal=33%"  
 GSE35685\_CD34POS\_CD38NEG\_VS\_CD34POS\_CD10POS\_BONE\_MARROW\_UP  
 GSE35685\_CD34POS\_CD38NEG\_VS\_CD34POS\_CD10POS\_BONE\_MARROW\_UP  
 160 0.22827028 0.9474502 0.58958334  
 0.61906683 1 2103 "tags=21%, list=15%, signal=24%"  
 GSE17721\_LPS\_VS\_POLYIC\_1H\_BMDC\_DN GSE17721\_LPS\_VS\_POLYIC\_1H\_BMDC\_DN  
 144 0.22895359 0.9471404 0.5960265  
 0.61966026 1 2317 "tags=24%, list=16%, signal=28%"  
 GSE19401\_UNSTIM\_VS\_RETINOIC\_ACID\_STIM\_FOLLICULAR\_DC\_DN  
 GSE19401\_UNSTIM\_VS\_RETINOIC\_ACID\_STIM\_FOLLICULAR\_DC\_DN  
 152 0.2292136 0.947008 0.6197479 0.6197821  
 1 1997 "tags=20%, list=14%, signal=24%"  
 GSE6269\_STAPH\_AUREUS\_VS\_STREP\_PNEUMO\_INF\_PBMC\_DN  
 GSE6269\_STAPH\_AUREUS\_VS\_STREP\_PNEUMO\_INF\_PBMC\_DN 133  
 0.23472981 0.94616723 0.5720339 0.62186325  
 1 1325 "tags=13%, list=9%, signal=14%"  
 GSE7460\_WT\_VS\_FOXP3\_HET\_ACT\_TCONV\_DN

GSE7460\_WT\_VS\_FOXP3\_HET\_ACT\_TCONV\_DN 146  
0.23112404 0.94582 0.57419354 0.6225543 1  
3028 "tags=32%, list=21%, signal=41%"  
GSE3982\_DC\_VS\_NKCELL\_UP GSE3982\_DC\_VS\_NKCELL\_UP 150  
0.22774607 0.94295317 0.5807128 0.63036513  
1 1586 "tags=14%, list=11%, signal=16%"  
GSE15659\_NAIVE\_VS\_PTPRC\_NEG\_CD4\_TCELL\_DN  
GSE15659\_NAIVE\_VS\_PTPRC\_NEG\_CD4\_TCELL\_DN 137  
0.23018286 0.9422692 0.6106557 0.6320043  
1 1323 "tags=12%, list=9%, signal=13%"  
GSE2706\_R848\_VS\_R848\_AND\_LPS\_8H\_STIM\_DC\_UP  
GSE2706\_R848\_VS\_R848\_AND\_LPS\_8H\_STIM\_DC\_UP 118  
0.23325352 0.9417106 0.5840517 0.6332637  
1 2079 "tags=19%, list=15%, signal=22%"  
GSE5589\_WT\_VS\_IL10\_KO\_LPS\_AND\_IL6\_STIM\_MACROPHAGE\_45MIN\_DN  
GSE5589\_WT\_VS\_IL10\_KO\_LPS\_AND\_IL6\_STIM\_MACROPHAGE\_45MIN\_DN  
137 0.23289108 0.94112366 0.58635396  
0.63459736 1 1308 "tags=10%, list=9%, signal=11%"  
GSE11884\_WT\_VS\_FURIN\_KO\_NAIVE\_CD4\_TCELL\_UP  
GSE11884\_WT\_VS\_FURIN\_KO\_NAIVE\_CD4\_TCELL\_UP 104  
0.23712765 0.9408768 0.5625 0.635034 1  
1551 "tags=17%, list=11%, signal=19%"  
GSE29618\_PRE\_VS\_DAY7\_POST\_TIV\_FLU\_VACCINE\_MDC\_DN  
GSE29618\_PRE\_VS\_DAY7\_POST\_TIV\_FLU\_VACCINE\_MDC\_DN 134  
0.23084252 0.9408415 0.5833333 0.63488483  
1 1701 "tags=15%, list=12%, signal=17%"  
GSE17721\_LPS\_VS\_PAM3CSK4\_2H\_BMDC\_DN  
GSE17721\_LPS\_VS\_PAM3CSK4\_2H\_BMDC\_DN 158  
0.22426838 0.93774444 0.610998 0.6432004 1  
1953 "tags=18%, list=14%, signal=20%"  
GSE46606\_IRF4\_KO\_VS\_WT\_CD40L\_IL2\_IL5\_1DAY\_STIMULATED\_BCELL\_DN  
GSE46606\_IRF4\_KO\_VS\_WT\_CD40L\_IL2\_IL5\_1DAY\_STIMULATED\_BCELL\_DN  
128 0.23178503 0.93764 0.57894737  
0.64322555 1 2257 "tags=21%, list=16%, signal=25%"  
GSE17721\_LPS\_VS\_GARDIQUIMOD\_6H\_BMDC\_UP  
GSE17721\_LPS\_VS\_GARDIQUIMOD\_6H\_BMDC\_UP 149  
0.22809124 0.93705595 0.5835141 0.64456606  
1 2372 "tags=26%, list=17%, signal=31%"  
GSE5589\_WT\_VS\_IL6\_KO\_LPS\_STIM\_MACROPHAGE\_45MIN\_DN  
GSE5589\_WT\_VS\_IL6\_KO\_LPS\_STIM\_MACROPHAGE\_45MIN\_DN 153  
0.22482145 0.9345697 0.6266925 0.65132314  
1 2204 "tags=19%, list=16%, signal=22%"  
GSE360\_CTRL\_VS\_L\_MAJOR\_MAC\_DN GSE360\_CTRL\_VS\_L\_MAJOR\_MAC\_DN  
147 0.22396287 0.933638 0.6476578  
0.65364295 1 2081 "tags=20%, list=15%, signal=24%"  
GSE35543\_IN\_VITRO\_ITREG\_VS\_CONVERTED\_EX\_ITREG\_DN  
GSE35543\_IN\_VITRO\_ITREG\_VS\_CONVERTED\_EX\_ITREG\_DN 147  
0.22544906 0.93340844 0.6252588 0.654021 1  
1702 "tags=16%, list=12%, signal=18%"  
GSE45365\_HEALTHY\_VS\_MCMV\_INFECTION\_CD8\_TCELL\_IFNAR\_KO\_UP  
GSE45365\_HEALTHY\_VS\_MCMV\_INFECTION\_CD8\_TCELL\_IFNAR\_KO\_UP  
104 0.23826143 0.9331539 0.58921164  
0.65445983 1 2011 "tags=22%, list=14%, signal=26%"  
GSE41176\_WT\_VS\_TAK1\_KO\_ANTI\_IGM\_STIM\_BCELL\_3H\_UP

GSE41176\_WT\_VS\_TAK1\_KO\_ANTI\_IGM\_STIM\_BCELL\_3H\_UP 146  
0.22569524 0.93286145 0.6261062 0.6550323  
1 1931 "tags=21%, list=14%, signal=24%"  
GSE17974\_IL4\_AND\_ANTI\_IL12\_VS\_UNTREATED\_2H\_ACT\_CD4\_TCELL\_UP  
GSE17974\_IL4\_AND\_ANTI\_IL12\_VS\_UNTREATED\_2H\_ACT\_CD4\_TCELL\_UP  
112 0.2318532 0.9323099 0.6189474  
0.65632993 1 1671 "tags=16%, list=12%, signal=18%"  
GSE3982\_NEUTROPHIL\_VS\_TH2\_UP GSE3982\_NEUTROPHIL\_VS\_TH2\_UP  
150 0.22225322 0.9315565 0.64344263  
0.6581183 1 2121 "tags=19%, list=15%, signal=22%"  
GSE15930\_STIM\_VS\_STIM\_AND\_IL12\_24H\_CD8\_T\_CELL\_DN  
GSE15930\_STIM\_VS\_STIM\_AND\_IL12\_24H\_CD8\_T\_CELL\_DN 159  
0.22256643 0.9310025 0.66170216 0.6593953  
1 2226 "tags=19%, list=16%, signal=22%"  
GSE13306\_TREG\_RA\_VS\_TCONV\_RA\_UP GSE13306\_TREG\_RA\_VS\_TCONV\_RA\_UP  
143 0.22766268 0.92920935 0.640592 0.664238  
1 1860 "tags=17%, list=13%, signal=20%"  
GSE2585\_THYMIC\_DC\_VS\_MTEC\_UP GSE2585\_THYMIC\_DC\_VS\_MTEC\_UP  
130 0.23014174 0.92869264 0.6039823  
0.66543174 1 1971 "tags=20%, list=14%, signal=23%"  
GSE6259\_FLT3L\_INDUCED\_33D1\_POS\_DC\_VS\_BCELL\_UP  
GSE6259\_FLT3L\_INDUCED\_33D1\_POS\_DC\_VS\_BCELL\_UP 133  
0.22667186 0.9284619 0.62658226 0.66580427  
1 2684 "tags=28%, list=19%, signal=34%"  
GSE2124\_CTRL\_VS\_LYMPHOTOXIN\_BETA\_TREATED\_MLN\_UP  
GSE2124\_CTRL\_VS\_LYMPHOTOXIN\_BETA\_TREATED\_MLN\_UP 130  
0.22988999 0.92811954 0.6163265 0.66649854  
1 2434 "tags=17%, list=17%, signal=20%"  
GSE17721\_LPS\_VS\_CPG\_24H\_BMDC\_UP GSE17721\_LPS\_VS\_CPG\_24H\_BMDC\_UP  
150 0.22349408 0.9275204 0.6325678  
0.6679039 1 2209 "tags=22%, list=16%, signal=26%"  
GSE3982\_DC\_VS\_NEUTROPHIL\_LPS\_STIM\_DN  
GSE3982\_DC\_VS\_NEUTROPHIL\_LPS\_STIM\_DN 147  
0.22271566 0.92654985 0.6476578 0.67032033  
1 2422 "tags=24%, list=17%, signal=28%"  
GSE20715\_WT\_VS\_TLR4\_KO\_LUNG\_DN GSE20715\_WT\_VS\_TLR4\_KO\_LUNG\_DN  
142 0.22468579 0.92639816 0.62634987  
0.67048645 1 2664 "tags=25%, list=19%, signal=31%"  
GSE11961\_FOLLICULAR\_BCELL\_VS\_MEMORY\_BCELL\_DAY40\_UP  
GSE11961\_FOLLICULAR\_BCELL\_VS\_MEMORY\_BCELL\_DAY40\_UP 145  
0.22635165 0.9260996 0.62729126 0.671064 1  
1446 "tags=13%, list=10%, signal=14%"  
GSE4142\_GC\_BCELL\_VS\_MEMORY\_BCELL\_UP  
GSE4142\_GC\_BCELL\_VS\_MEMORY\_BCELL\_UP 141  
0.22408156 0.9254878 0.6693387 0.67247206  
1 1473 "tags=14%, list=10%, signal=16%"  
GSE3982\_MAST\_CELL\_VS\_EFF\_MEMORY\_CD4\_TCELL\_DN  
GSE3982\_MAST\_CELL\_VS\_EFF\_MEMORY\_CD4\_TCELL\_DN 143  
0.22291772 0.9242897 0.6528926 0.67554337  
1 2403 "tags=20%, list=17%, signal=24%"  
GSE16385\_MONOCYTE\_VS\_12H\_IFNG\_TNF\_TREATED\_MACROPHAGE\_DN  
GSE16385\_MONOCYTE\_VS\_12H\_IFNG\_TNF\_TREATED\_MACROPHAGE\_DN  
139 0.22552791 0.92424446 0.65163934  
0.6754012 1 2532 "tags=20%, list=18%, signal=24%"

GSE2770\_IL12\_VS\_TGFB\_AND\_IL12\_TREATED\_ACT\_CD4\_TCELL\_6H\_UP  
GSE2770\_IL12\_VS\_TGFB\_AND\_IL12\_TREATED\_ACT\_CD4\_TCELL\_6H\_UP  
133 0.22819287 0.92418593 0.6188341  
0.67528737 1 1335 "tags=14%, list=9%, signal=15%"  
GSE17721\_CTRL\_VS\_CPG\_0.5H\_BMDC\_DN GSE17721\_CTRL\_VS\_CPG\_0.5H\_BMDC\_DN  
150 0.22525118 0.92238355 0.6506024  
0.6800202 1 2000 "tags=14%, list=14%, signal=16%"  
GSE17721\_CTRL\_VS\_PAM3CSK4\_4H\_BMDC\_DN  
GSE17721\_CTRL\_VS\_PAM3CSK4\_4H\_BMDC\_DN 156  
0.21865177 0.9194854 0.6958333 0.68766475  
1 2110 "tags=17%, list=15%, signal=20%"  
GSE40685\_NAIVE\_CD4\_TCELL\_VS\_TREG\_UP  
GSE40685\_NAIVE\_CD4\_TCELL\_VS\_TREG\_UP 110  
0.23240888 0.9190277 0.62785864 0.68863916  
1 2211 "tags=19%, list=16%, signal=22%"  
GSE1740\_UNSTIM\_VS\_IFNA\_STIMULATED\_MCSF\_DERIVED\_MACROPHAGE\_UP  
GSE1740\_UNSTIM\_VS\_IFNA\_STIMULATED\_MCSF\_DERIVED\_MACROPHAGE\_UP  
95 0.23911455 0.91900504 0.6367432  
0.6884409 1 1500 "tags=14%, list=11%, signal=15%"  
GSE18893\_CTRL\_VS\_TNF\_TREATED\_TREG\_2H\_DN  
GSE18893\_CTRL\_VS\_TNF\_TREATED\_TREG\_2H\_DN 139  
0.22241446 0.91856384 0.64316237 0.6893505  
1 1157 "tags=12%, list=8%, signal=12%"  
GSE27786\_NEUTROPHIL\_VS\_MONO\_MAC\_UP  
GSE27786\_NEUTROPHIL\_VS\_MONO\_MAC\_UP 136  
0.22495621 0.9181483 0.6446281 0.69026035  
1 2416 "tags=25%, list=17%, signal=30%"  
GSE37416\_12H\_VS\_24H\_F\_TULARENSIS\_LVS\_NEUTROPHIL\_DN  
GSE37416\_12H\_VS\_24H\_F\_TULARENSIS\_LVS\_NEUTROPHIL\_DN 133  
0.22664967 0.9173065 0.6398305 0.6922694  
1 2326 "tags=24%, list=16%, signal=29%"  
GSE3982\_EOSINOPHIL\_VS\_DC\_UP GSE3982\_EOSINOPHIL\_VS\_DC\_UP  
131 0.2285495 0.9163665 0.6557734  
0.69460994 1 2421 "tags=25%, list=17%, signal=30%"  
GSE18791\_CTRL\_VS\_NEWCASTLE\_VIRUS\_DC\_2H\_UP  
GSE18791\_CTRL\_VS\_NEWCASTLE\_VIRUS\_DC\_2H\_UP 111  
0.23146652 0.91552126 0.640592 0.69658947 1  
2231 "tags=21%, list=16%, signal=24%"  
GSE27859\_MACROPHAGE\_VS\_CD11C\_INT\_F480\_INT\_DC\_UP  
GSE27859\_MACROPHAGE\_VS\_CD11C\_INT\_F480\_INT\_DC\_UP 137  
0.22439392 0.91532665 0.6598778 0.69684434  
1 2575 "tags=23%, list=18%, signal=27%"  
GSE13306\_TREG\_VS\_TCONV\_LAMINA\_PROPRIA\_DN  
GSE13306\_TREG\_VS\_TCONV\_LAMINA\_PROPRIA\_DN 140  
0.21927579 0.91526985 0.7006369 0.6967361  
1 2103 "tags=21%, list=15%, signal=25%"  
GSE5589\_UNSTIM\_VS\_180MIN\_LPS\_STIM\_MACROPHAGE\_UP  
GSE5589\_UNSTIM\_VS\_180MIN\_LPS\_STIM\_MACROPHAGE\_UP 138  
0.22307931 0.9146804 0.65217394 0.69809645  
1 1513 "tags=14%, list=11%, signal=16%"  
GSE19941\_IL10\_KO\_VS\_IL10\_KO\_AND\_NFKBP50\_KO\_UNSTIM\_MACROPHAGE\_UP  
GSE19941\_IL10\_KO\_VS\_IL10\_KO\_AND\_NFKBP50\_KO\_UNSTIM\_MACROPHAGE\_UP  
157 0.2168811 0.91393524 0.70675105  
0.6998485 1 2511 "tags=22%, list=18%, signal=26%"

GSE17721\_CPG\_VS\_GARDIQUIMOD\_0.5H\_BMDC\_DN  
GSE17721\_CPG\_VS\_GARDIQUIMOD\_0.5H\_BMDC\_DN 153  
0.22026332 0.9138727 0.6533613 0.69975084  
1 2585 "tags=26%, list=18%, signal=32%"  
GSE37301\_HEMATOPOIETIC\_STEM\_CELL\_VS\_MULTIPOTENT\_PROGENITOR\_UP  
GSE37301\_HEMATOPOIETIC\_STEM\_CELL\_VS\_MULTIPOTENT\_PROGENITOR\_UP  
157 0.22100034 0.9134717 0.67075664  
0.70057565 1 2700 "tags=25%, list=19%, signal=31%"  
GSE29615\_DAY3\_VS\_DAY7\_LAIV\_FLU\_VACCINE\_PBMC\_DN  
GSE29615\_DAY3\_VS\_DAY7\_LAIV\_FLU\_VACCINE\_PBMC\_DN 120  
0.2228821 0.91181636 0.70464134 0.70494527  
1 2454 "tags=25%, list=17%, signal=30%"  
GSE21360\_PRIMARY\_VS\_SECONDARY\_MEMORY\_CD8\_TCELL\_DN  
GSE21360\_PRIMARY\_VS\_SECONDARY\_MEMORY\_CD8\_TCELL\_DN 148  
0.2225062 0.9115732 0.6954644 0.70533186  
1 1984 "tags=18%, list=14%, signal=21%"  
GSE17721\_CTRL\_VS\_LPS\_4H\_BMDC\_DN GSE17721\_CTRL\_VS\_LPS\_4H\_BMDC\_DN  
160 0.21839651 0.9111809 0.6789366  
0.70610154 1 1508 "tags=13%, list=11%, signal=15%"  
GSE5589\_LPS\_VS\_LPS\_AND\_IL6\_STIM\_IL10\_KO\_MACROPHAGE\_45MIN\_DN  
GSE5589\_LPS\_VS\_LPS\_AND\_IL6\_STIM\_IL10\_KO\_MACROPHAGE\_45MIN\_DN  
152 0.21722429 0.91102713 0.6929638  
0.7062715 1 1469 "tags=14%, list=10%, signal=15%"  
GSE3982\_MAC\_VS\_NEUTROPHIL\_DN GSE3982\_MAC\_VS\_NEUTROPHIL\_DN  
140 0.21834624 0.90968233 0.7008197  
0.70966786 1 1847 "tags=16%, list=13%, signal=18%"  
GSE45837\_WT\_VS\_GFI1\_KO\_PDC\_UP GSE45837\_WT\_VS\_GFI1\_KO\_PDC\_UP  
130 0.22258146 0.9092429 0.69214875  
0.71057147 1 1769 "tags=15%, list=13%, signal=17%"  
GSE21774\_CD56\_BRIGHT\_VS\_DIM\_CD62L\_POSITIVE\_NK\_CELL\_DN  
GSE21774\_CD56\_BRIGHT\_VS\_DIM\_CD62L\_POSITIVE\_NK\_CELL\_DN  
137 0.22352502 0.90870345 0.6923077  
0.7118026 1 3014 "tags=27%, list=21%, signal=34%"  
GSE27670\_BLIMP1\_VS\_LMP1\_TRANSDUCED\_GC\_BCELL\_UP  
GSE27670\_BLIMP1\_VS\_LMP1\_TRANSDUCED\_GC\_BCELL\_UP 158  
0.21730143 0.9080656 0.68 0.7132187 1  
2445 "tags=22%, list=17%, signal=26%"  
GSE17721\_PAM3CSK4\_VS\_GADIQUIMOD\_16H\_BMDC\_UP  
GSE17721\_PAM3CSK4\_VS\_GADIQUIMOD\_16H\_BMDC\_UP 151  
0.22001758 0.9073984 0.703629 0.7146869 1  
2042 "tags=19%, list=14%, signal=22%"  
GSE20152\_HTNFA\_OVERXPRESS\_ANKLE\_VS\_CTRL\_SPHK1\_KO\_ANKLE\_UP  
GSE20152\_HTNFA\_OVERXPRESS\_ANKLE\_VS\_CTRL\_SPHK1\_KO\_ANKLE\_UP  
140 0.21911126 0.9072712 0.7118644  
0.7147345 1 3405 "tags=31%, list=24%, signal=40%"  
GSE9960\_HEALTHY\_VS\_SEPSIS\_PBMC\_UP GSE9960\_HEALTHY\_VS\_SEPSIS\_PBMC\_UP  
137 0.2238131 0.90719193 0.6624738  
0.71467024 1 1937 "tags=19%, list=14%, signal=22%"  
GSE3982\_EOSINOPHIL\_VS\_TH1\_UP GSE3982\_EOSINOPHIL\_VS\_TH1\_UP  
141 0.2203343 0.90709937 0.69690263  
0.71462643 1 1855 "tags=19%, list=13%, signal=22%"  
GSE29164\_UNTREATED\_VS\_CD8\_TCELL\_TREATED\_MELANOMA\_DAY7\_DN  
GSE29164\_UNTREATED\_VS\_CD8\_TCELL\_TREATED\_MELANOMA\_DAY7\_DN  
137 0.22035863 0.90479827 0.7033195

|                                                                                   |                                                                                   |                                  |                                  |                                  |
|-----------------------------------------------------------------------------------|-----------------------------------------------------------------------------------|----------------------------------|----------------------------------|----------------------------------|
| 0.7205516                                                                         | 1                                                                                 | 1115                             | "tags=12%, list=8%, signal=13%"  |                                  |
| GSE22886_NAIVE_VS_MEMORY_TCELL_UP                                                 | GSE22886_NAIVE_VS_MEMORY_TCELL_UP                                                 |                                  |                                  |                                  |
| 139                                                                               | 0.22228111                                                                        | 0.904354                         | 0.6956522                        |                                  |
| 0.7214841                                                                         | 1                                                                                 | 2796                             | "tags=27%, list=20%, signal=34%" |                                  |
| GSE37532_VISCERAL_ADIPOSE_TISSUE_VS_LN_DERIVED_PPARG_KO_TREG_CD4_TCELL_DN         | GSE37532_VISCERAL_ADIPOSE_TISSUE_VS_LN_DERIVED_PPARG_KO_TREG_CD4_TCELL_DN         |                                  |                                  |                                  |
| 98                                                                                | 0.23403591                                                                        | 0.90422595                       |                                  |                                  |
| 0.65800864                                                                        | 0.7215276                                                                         | 1                                | 1733                             | "tags=16%, list=12%, signal=18%" |
| GSE22601_DOUBLE_NEGATIVE_VS_CD8_SINGLE_POSITIVE_THYMOCYTE_UP                      | GSE22601_DOUBLE_NEGATIVE_VS_CD8_SINGLE_POSITIVE_THYMOCYTE_UP                      |                                  |                                  |                                  |
| 114                                                                               | 0.22657196                                                                        | 0.90390337                       | 0.6631356                        |                                  |
| 0.7221096                                                                         | 1                                                                                 | 1098                             | "tags=10%, list=8%, signal=10%"  |                                  |
| GSE3982_MAST_CELL_VS_DC_DN                                                        | GSE3982_MAST_CELL_VS_DC_DN                                                        |                                  |                                  |                                  |
| 140                                                                               | 0.21833932                                                                        | 0.90329516                       | 0.706383                         |                                  |
| 0.7234745                                                                         | 1                                                                                 | 2350                             | "tags=22%, list=17%, signal=26%" |                                  |
| GSE46242_TH1_VS_ANERGIC_TH1_CD4_TCELL_DN                                          | GSE46242_TH1_VS_ANERGIC_TH1_CD4_TCELL_DN                                          |                                  |                                  |                                  |
| 110                                                                               |                                                                                   |                                  |                                  |                                  |
| 0.23014237                                                                        | 0.8996554                                                                         | 0.6794055                        | 0.7327765                        |                                  |
| 1                                                                                 | 1967                                                                              | "tags=16%, list=14%, signal=19%" |                                  |                                  |
| GSE25123_CTRL_VS_IL4_AND_ROSIGLITAZONE_STIM_MACROPHAGE_DN                         | GSE25123_CTRL_VS_IL4_AND_ROSIGLITAZONE_STIM_MACROPHAGE_DN                         |                                  |                                  |                                  |
| 123                                                                               | 0.22551498                                                                        | 0.89831007                       | 0.69365424                       |                                  |
| 0.7360887                                                                         | 1                                                                                 | 2355                             | "tags=25%, list=17%, signal=30%" |                                  |
| GSE27786_LIN_NEG_VS_NEUTROPHIL_DN                                                 | GSE27786_LIN_NEG_VS_NEUTROPHIL_DN                                                 |                                  |                                  |                                  |
| 145                                                                               | 0.22012554                                                                        | 0.8977322                        | 0.7163561                        |                                  |
| 0.7373684                                                                         | 1                                                                                 | 2555                             | "tags=25%, list=18%, signal=30%" |                                  |
| GSE19772_HCMV_INFL_VS_HCMV_INF_MONOCYTES_AND_PI3K_INHIBITION_UP                   | GSE19772_HCMV_INFL_VS_HCMV_INF_MONOCYTES_AND_PI3K_INHIBITION_UP                   |                                  |                                  |                                  |
| 159                                                                               | 0.21435757                                                                        | 0.897618                         | 0.7133758                        |                                  |
| 0.7373936                                                                         | 1                                                                                 | 2660                             | "tags=23%, list=19%, signal=28%" |                                  |
| GSE13762_CTRL_VS_125_VITAMIND_DAY12_DC_DN                                         | GSE13762_CTRL_VS_125_VITAMIND_DAY12_DC_DN                                         |                                  |                                  |                                  |
| 101                                                                               |                                                                                   |                                  |                                  |                                  |
| 0.2317269                                                                         | 0.8970634                                                                         | 0.6893004                        | 0.7386119                        |                                  |
| 1                                                                                 | 2356                                                                              | "tags=20%, list=17%, signal=24%" |                                  |                                  |
| GSE17721_POLYIC_VS_PAM3CSK4_2H_BMDC_DN                                            | GSE17721_POLYIC_VS_PAM3CSK4_2H_BMDC_DN                                            |                                  |                                  |                                  |
| 162                                                                               |                                                                                   |                                  |                                  |                                  |
| 0.21397477                                                                        | 0.89688003                                                                        | 0.71929824                       | 0.73881537                       |                                  |
| 1                                                                                 | 1830                                                                              | "tags=13%, list=13%, signal=15%" |                                  |                                  |
| GSE23114_WT_VS_SLE2C1_MOUSE_PERITONEAL_CAVITY_B1A_BCELL_UP                        | GSE23114_WT_VS_SLE2C1_MOUSE_PERITONEAL_CAVITY_B1A_BCELL_UP                        |                                  |                                  |                                  |
| 118                                                                               | 0.22140443                                                                        | 0.8963539                        | 0.70264316                       |                                  |
| 0.7399674                                                                         | 1                                                                                 | 2218                             | "tags=19%, list=16%, signal=23%" |                                  |
| GSE36009_UNSTIM_VS_LPS_STIM_DC_DN                                                 | GSE36009_UNSTIM_VS_LPS_STIM_DC_DN                                                 |                                  |                                  |                                  |
| 137                                                                               | 0.21855377                                                                        | 0.89627343                       | 0.7114968                        |                                  |
| 0.73988944                                                                        | 1                                                                                 | 2222                             | "tags=23%, list=16%, signal=27%" |                                  |
| GSE17721_4H_VS_24H_POLYIC_BMDC_DN                                                 | GSE17721_4H_VS_24H_POLYIC_BMDC_DN                                                 |                                  |                                  |                                  |
| 157                                                                               | 0.21553357                                                                        | 0.89584035                       | 0.7310195                        |                                  |
| 0.74077433                                                                        | 1                                                                                 | 2740                             | "tags=30%, list=19%, signal=37%" |                                  |
| GSE25123_ROSIGLITAZONE_VS_IL4_AND_ROSIGLITAZONE_STIM_PPARG_KO_MACROPHAGE_DAY10_DN | GSE25123_ROSIGLITAZONE_VS_IL4_AND_ROSIGLITAZONE_STIM_PPARG_KO_MACROPHAGE_DAY10_DN |                                  |                                  |                                  |
| 140                                                                               | 0.2168842                                                                         | 0.89409757                       |                                  |                                  |

|                                                                             |                                  |                                  |                                     |                                    |
|-----------------------------------------------------------------------------|----------------------------------|----------------------------------|-------------------------------------|------------------------------------|
| 0.71079427                                                                  | 0.74512213                       | 1                                | 1247                                | "tags=14%,<br>list=9%, signal=15%" |
| GSE17721_CPG_VS_GARDIQUIMOD_12H_BMDC_UP                                     |                                  |                                  |                                     |                                    |
| GSE17721_CPG_VS_GARDIQUIMOD_12H_BMDC_UP                                     |                                  |                                  |                                     |                                    |
| 0.21550977                                                                  | 0.89384735                       | 0.71487606                       | 0.74548644                          | 160                                |
| 1                                                                           | 1676                             | "tags=13%, list=12%, signal=15%" |                                     |                                    |
| GSE2405_HEAT_KILLED_LYSATE_VS_LIVE_A_PHAGOCYTOPHILUM_STIM_NEUTROPHIL_24H_DN |                                  |                                  |                                     |                                    |
| GSE2405_HEAT_KILLED_LYSATE_VS_LIVE_A_PHAGOCYTOPHILUM_STIM_NEUTROPHIL_24H_DN |                                  |                                  |                                     |                                    |
| 0.7407407                                                                   | 149                              | 0.2154161                        | 0.89297104                          |                                    |
| 0.7475382                                                                   | 1                                | 1865                             | "tags=16%,<br>list=13%, signal=18%" |                                    |
| GSE14769_UNSTIM_VS_360MIN_LPS_BMDM_DN                                       |                                  |                                  |                                     |                                    |
| GSE14769_UNSTIM_VS_360MIN_LPS_BMDM_DN                                       |                                  |                                  |                                     |                                    |
| 0.21536197                                                                  | 0.89121646                       | 0.73617023                       | 0.7518704                           | 141                                |
| 1                                                                           | 2249                             | "tags=18%, list=16%, signal=21%" |                                     |                                    |
| GSE21927_SPLEEN_VS_4T1_TUMOR_MONOCYTE_BALBC_UP                              |                                  |                                  |                                     |                                    |
| GSE21927_SPLEEN_VS_4T1_TUMOR_MONOCYTE_BALBC_UP                              |                                  |                                  |                                     |                                    |
| 0.22268243                                                                  | 0.8902156                        | 0.7319149                        | 0.7541914                           | 129                                |
| 1                                                                           | 2133                             | "tags=21%, list=15%, signal=24%" |                                     |                                    |
| GSE25502_WT_VS_KLF13_KO_THYMIC_MEMORY_LIKE_CD8_TCELL_UP                     |                                  |                                  |                                     |                                    |
| GSE25502_WT_VS_KLF13_KO_THYMIC_MEMORY_LIKE_CD8_TCELL_UP                     |                                  |                                  |                                     |                                    |
| 120                                                                         | 0.22075641                       | 0.88877106                       | 0.702407                            | 0.7576308                          |
| 1                                                                           | 1910                             | "tags=17%, list=14%, signal=19%" |                                     |                                    |
| GSE3982_CTRL_VS_PMA_STIM_EOSINOPHIL_DN                                      |                                  |                                  |                                     |                                    |
| GSE3982_CTRL_VS_PMA_STIM_EOSINOPHIL_DN                                      |                                  |                                  |                                     |                                    |
| 0.21849185                                                                  | 0.88770527                       | 0.7196653                        | 0.7601036                           | 131                                |
| 1                                                                           | 1670                             | "tags=14%, list=12%, signal=15%" |                                     |                                    |
| GSE5099_CLASSICAL_M1_VS_ALTERNATIVE_M2_MACROPHAGE_DN                        |                                  |                                  |                                     |                                    |
| GSE5099_CLASSICAL_M1_VS_ALTERNATIVE_M2_MACROPHAGE_DN                        |                                  |                                  |                                     |                                    |
| 115                                                                         | 0.22312713                       | 0.8870465                        | 0.6865672                           |                                    |
| 0.7615428                                                                   | 1                                | 928                              | "tags=8%, list=7%, signal=8%"       |                                    |
| GSE16385_MONOCYTE_VS_12H_ROSIGLITAZONE_TREATED_MACROPHAGE_UP                |                                  |                                  |                                     |                                    |
| GSE16385_MONOCYTE_VS_12H_ROSIGLITAZONE_TREATED_MACROPHAGE_UP                |                                  |                                  |                                     |                                    |
|                                                                             | 144                              | 0.21231903                       | 0.886785                            | 0.76008064                         |
| 0.7619499                                                                   | 1                                | 1936                             | "tags=17%, list=14%, signal=19%"    |                                    |
| GSE11057_CD4_CENT_MEM_VS_PBMC_DN                                            |                                  |                                  |                                     |                                    |
| GSE11057_CD4_CENT_MEM_VS_PBMC_DN                                            |                                  |                                  |                                     |                                    |
|                                                                             | 138                              | 0.2162281                        | 0.88658494                          | 0.7505241                          |
| 0.76218945                                                                  | 1                                | 2085                             | "tags=17%, list=15%, signal=20%"    |                                    |
| GSE17721_POLYIC_VS_GARDIQUIMOD_0.5H_BMDC_UP                                 |                                  |                                  |                                     |                                    |
| GSE17721_POLYIC_VS_GARDIQUIMOD_0.5H_BMDC_UP                                 |                                  |                                  |                                     |                                    |
| 0.21516298                                                                  | 0.886389                         | 0.7240664                        | 0.7623972                           | 150                                |
| 2027                                                                        | "tags=16%, list=14%, signal=18%" |                                  |                                     |                                    |
| GSE22025_UNTREATED_VS_TGFB1_TREATED_CD4_TCELL_DN                            |                                  |                                  |                                     |                                    |
| GSE22025_UNTREATED_VS_TGFB1_TREATED_CD4_TCELL_DN                            |                                  |                                  |                                     |                                    |
| 0.21484458                                                                  | 0.8858482                        | 0.7397541                        | 0.76349455                          | 142                                |
| 1                                                                           | 1089                             | "tags=9%, list=8%, signal=10%"   |                                     |                                    |
| GSE18281_SUBCAPSULAR_CORTICAL_REGION_VS_WHOLE_CORTEX_THYMUS_UP              |                                  |                                  |                                     |                                    |
| GSE18281_SUBCAPSULAR_CORTICAL_REGION_VS_WHOLE_CORTEX_THYMUS_UP              |                                  |                                  |                                     |                                    |
|                                                                             | 151                              | 0.21297479                       | 0.8850174                           | 0.76257545                         |
| 0.76531893                                                                  | 1                                | 2695                             | "tags=22%, list=19%, signal=27%"    |                                    |
| GSE42021_CD24INT_TREG_VS_CD24INT_TCONV_THYMUS_DN                            |                                  |                                  |                                     |                                    |
| GSE42021_CD24INT_TREG_VS_CD24INT_TCONV_THYMUS_DN                            |                                  |                                  |                                     |                                    |
| 0.21200418                                                                  | 0.8848674                        | 0.7531915                        | 0.7654037                           | 156                                |



1 2343 "tags=21%, list=17%, signal=24%"  
GSE17974\_IL4\_AND\_ANTI\_IL12\_VS\_UNTREATED\_1H\_ACT\_CD4\_TCELL\_DN  
GSE17974\_IL4\_AND\_ANTI\_IL12\_VS\_UNTREATED\_1H\_ACT\_CD4\_TCELL\_DN  
95 0.23110986 0.8837014 0.6905263 0.768137  
1 516 "tags=5%, list=4%, signal=5%"  
GSE15659\_NAIVE\_CD4\_TCELL\_VS\_RESTING\_TREG\_UP  
GSE15659\_NAIVE\_CD4\_TCELL\_VS\_RESTING\_TREG\_UP 116  
0.22359726 0.88366395 0.72307694 0.76794064  
1 2543 "tags=22%, list=18%, signal=27%"  
GSE22432\_MULTIPOTENT\_PROGENITOR\_VS\_CDC\_UP  
GSE22432\_MULTIPOTENT\_PROGENITOR\_VS\_CDC\_UP 149  
0.21169786 0.8827384 0.75365347 0.77002674  
1 2321 "tags=23%, list=16%, signal=28%"  
GSE27859\_MACROPHAGE\_VS\_DC\_DN GSE27859\_MACROPHAGE\_VS\_DC\_DN  
130 0.21589729 0.8822212 0.7782178  
0.7710932 1 1561 "tags=15%, list=11%, signal=16%"  
GSE46606\_UNSTIM\_VS\_CD40L\_IL2\_IL5\_1DAY\_STIMULATED\_IRF4MID\_SORTED\_BCEL  
L\_DN  
GSE46606\_UNSTIM\_VS\_CD40L\_IL2\_IL5\_1DAY\_STIMULATED\_IRF4MID\_SORTED\_BCEL  
L\_DN 129 0.21842945 0.8812218  
0.7694013 0.77332693 1 1782 "tags=15%,  
list=13%, signal=17%"  
GSE42021\_TCONV\_PLN\_VS\_CD24INT\_TCONV\_THYMUS\_UP  
GSE42021\_TCONV\_PLN\_VS\_CD24INT\_TCONV\_THYMUS\_UP 148  
0.21276627 0.879996 0.7688985 0.77603865 1  
2635 "tags=26%, list=19%, signal=32%"  
GSE37605\_C57BL6\_VS\_NOD\_FOXP3\_IRES\_GFP\_TREG\_DN  
GSE37605\_C57BL6\_VS\_NOD\_FOXP3\_IRES\_GFP\_TREG\_DN 145  
0.21231224 0.8795385 0.79317695 0.77690053  
1 2596 "tags=24%, list=18%, signal=29%"  
GSE20152\_HTNFA\_OVERXPRESS\_ANKLE\_VS\_CTRL\_SPHK1\_KO\_ANKLE\_DN  
GSE20152\_HTNFA\_OVERXPRESS\_ANKLE\_VS\_CTRL\_SPHK1\_KO\_ANKLE\_DN  
129 0.2152326 0.8777787 0.77272725  
0.7810168 1 1933 "tags=16%, list=14%, signal=18%"  
GSE23321\_EFFECTOR\_MEMORY\_VS\_NAIVE\_CD8\_TCELL\_UP  
GSE23321\_EFFECTOR\_MEMORY\_VS\_NAIVE\_CD8\_TCELL\_UP 133  
0.21794371 0.87730587 0.75446427 0.7819247  
1 1650 "tags=14%, list=12%, signal=16%"  
GSE3982\_EOSINOPHIL\_VS\_MAST\_CELL\_UP  
GSE3982\_EOSINOPHIL\_VS\_MAST\_CELL\_UP 140  
0.21120572 0.8761627 0.77546775 0.78447855  
1 2270 "tags=20%, list=16%, signal=24%"  
GSE37301\_HEMATOPOIETIC\_STEM\_CELL\_VS\_MULTIPOTENT\_PROGENITOR\_DN  
GSE37301\_HEMATOPOIETIC\_STEM\_CELL\_VS\_MULTIPOTENT\_PROGENITOR\_DN  
124 0.21530445 0.8754262 0.75615215  
0.7860527 1 1684 "tags=16%, list=12%, signal=18%"  
GSE43955\_10H\_VS\_60H\_ACT\_CD4\_TCELL\_DN  
GSE43955\_10H\_VS\_60H\_ACT\_CD4\_TCELL\_DN 157  
0.2115536 0.87472796 0.7648305 0.787454 1  
1964 "tags=18%, list=14%, signal=20%"  
GSE8921\_UNSTIM\_0H\_VS\_TLR1\_2\_STIM\_MONOCYTE\_24H\_UP  
GSE8921\_UNSTIM\_0H\_VS\_TLR1\_2\_STIM\_MONOCYTE\_24H\_UP 132  
0.21292424 0.8744585 0.76875 0.78781337 1  
858 "tags=8%, list=6%, signal=9%"

GSE21927\_SPLEEN\_VS\_C26GM\_TUMOR\_MONOCYTE\_BALBC\_UP  
GSE21927\_SPLEEN\_VS\_C26GM\_TUMOR\_MONOCYTE\_BALBC\_UP 105  
0.22180897 0.87213737 0.7108168 0.793155 1  
2542 "tags=17%, list=18%, signal=21%"  
GSE12003\_4D\_VS\_8D\_CULTURE\_BM\_PROGENITOR\_DN  
GSE12003\_4D\_VS\_8D\_CULTURE\_BM\_PROGENITOR\_DN 90  
0.22576398 0.8709399 0.73535794 0.79569155  
1 984 "tags=11%, list=7%, signal=12%"  
GSE18804\_BRAIN\_VS\_COLON\_TUMORAL\_MACROPHAGE\_DN  
GSE18804\_BRAIN\_VS\_COLON\_TUMORAL\_MACROPHAGE\_DN 143  
0.20983866 0.8685052 0.78723407 0.8011986  
1 1269 "tags=12%, list=9%, signal=13%"  
GSE22589\_SIV\_VS\_HIV\_AND\_SIV\_INFECTED\_DC\_DN  
GSE22589\_SIV\_VS\_HIV\_AND\_SIV\_INFECTED\_DC\_DN 138  
0.20934501 0.86414313 0.80353636 0.8112905  
1 1856 "tags=18%, list=13%, signal=21%"  
GSE22601\_DOUBLE\_NEGATIVE\_VS\_IMMATURE\_CD4\_SP\_THYMOCYTE\_DN  
GSE22601\_DOUBLE\_NEGATIVE\_VS\_IMMATURE\_CD4\_SP\_THYMOCYTE\_DN  
123 0.21558529 0.8636602 0.782 0.8120936  
1 2282 "tags=20%, list=16%, signal=24%"  
GSE10147\_IL3\_VS\_IL3\_AND\_HIVP17\_STIM\_PDC\_DN  
GSE10147\_IL3\_VS\_IL3\_AND\_HIVP17\_STIM\_PDC\_DN 111  
0.21391259 0.8633082 0.78099173 0.8126344  
1 1387 "tags=10%, list=10%, signal=11%"  
GSE4748\_CTRL\_VS\_CYANOBACTERIUM\_LP SLIKE\_STIM\_DC\_1H\_DN  
GSE4748\_CTRL\_VS\_CYANOBACTERIUM\_LP SLIKE\_STIM\_DC\_1H\_DN  
151 0.20942807 0.8631815 0.8059072  
0.81263953 1 2372 "tags=21%, list=17%, signal=24%"  
GSE6269\_FLU\_VS\_STREP\_PNEUMO\_INF\_PBMC\_DN  
GSE6269\_FLU\_VS\_STREP\_PNEUMO\_INF\_PBMC\_DN 122  
0.21513493 0.86279804 0.79957354 0.8132045  
1 2216 "tags=21%, list=16%, signal=25%"  
GSE40685\_NAIVE\_CD4\_TCELL\_VS\_FOXP3\_KO\_TREG\_PRECURSOR\_DN  
GSE40685\_NAIVE\_CD4\_TCELL\_VS\_FOXP3\_KO\_TREG\_PRECURSOR\_DN  
131 0.212285 0.8623898 0.7877462 0.8138541  
1 1478 "tags=12%, list=10%, signal=14%"  
GSE24210\_IL35\_TREATED\_VS\_RESTING\_TREG\_UP  
GSE24210\_IL35\_TREATED\_VS\_RESTING\_TREG\_UP 147  
0.20953032 0.85982454 0.8077754 0.8195368  
1 1634 "tags=12%, list=12%, signal=14%"  
GSE15659\_CD45RA\_NEG\_CD4\_TCELL\_VS\_RESTING\_TREG\_DN  
GSE15659\_CD45RA\_NEG\_CD4\_TCELL\_VS\_RESTING\_TREG\_DN 127  
0.20987767 0.8575648 0.832 0.82441026 1  
2438 "tags=19%, list=17%, signal=23%"  
GSE5503\_LIVER\_DC\_VS\_SPLEEN\_DC\_ACTIVATED\_ALLOGENIC\_TCELL\_UP  
GSE5503\_LIVER\_DC\_VS\_SPLEEN\_DC\_ACTIVATED\_ALLOGENIC\_TCELL\_UP  
147 0.20550476 0.8575612 0.80487806  
0.8241071 1 670 "tags=7%, list=5%, signal=7%"  
GSE2770\_UNTREATED\_VS\_TGFB\_AND\_IL12\_TREATED\_ACT\_CD4\_TCELL\_6H\_DN  
GSE2770\_UNTREATED\_VS\_TGFB\_AND\_IL12\_TREATED\_ACT\_CD4\_TCELL\_6H\_DN  
139 0.20830995 0.8566968 0.78904665  
0.8257735 1 2615 "tags=25%, list=19%, signal=31%"  
GSE16450\_IMMATURE\_VS\_MATURE\_NEURON\_CELL\_LINE\_12H\_IFNA\_STIM\_DN  
GSE16450\_IMMATURE\_VS\_MATURE\_NEURON\_CELL\_LINE\_12H\_IFNA\_STIM\_DN

|                                                                        |                                  |                                  |                                  |                                  |     |
|------------------------------------------------------------------------|----------------------------------|----------------------------------|----------------------------------|----------------------------------|-----|
|                                                                        | 138                              | 0.20653142                       | 0.8564249                        | 0.7946058                        |     |
| 0.8260548                                                              | 1                                | 2472                             | "tags=22%, list=18%, signal=26%" |                                  |     |
| GSE35543_IN_VIVO_NTREG_VS_CONVERTED_EX_ITREG_UP                        |                                  |                                  |                                  |                                  |     |
| GSE35543_IN_VIVO_NTREG_VS_CONVERTED_EX_ITREG_UP                        |                                  |                                  |                                  |                                  | 117 |
| 0.2108306                                                              | 0.8558867                        | 0.79288703                       | 0.8269678                        |                                  |     |
| 1                                                                      | 1909                             | "tags=16%, list=14%, signal=19%" |                                  |                                  |     |
| GSE9946_IMMATURE_VS_LISTERIA_INF_MATURE_DC_UP                          |                                  |                                  |                                  |                                  |     |
| GSE9946_IMMATURE_VS_LISTERIA_INF_MATURE_DC_UP                          |                                  |                                  |                                  |                                  | 102 |
| 0.2154872                                                              | 0.855811                         | 0.7677419                        | 0.82682973                       |                                  | 1   |
| 3425                                                                   | "tags=27%, list=24%, signal=36%" |                                  |                                  |                                  |     |
| GSE5503_LIVER_DC_VS_PLN_DC_ACTIVATED_ALLOGENIC_TCELL_UP                |                                  |                                  |                                  |                                  |     |
| GSE5503_LIVER_DC_VS_PLN_DC_ACTIVATED_ALLOGENIC_TCELL_UP                |                                  |                                  |                                  |                                  |     |
| 155                                                                    | 0.20498613                       | 0.85480416                       | 0.82365143                       |                                  |     |
| 0.8287809                                                              | 1                                | 1098                             | "tags=12%, list=8%, signal=13%"  |                                  |     |
| GSE2585_CD80_HIGH_VS_LOW_MTEC_DN                                       |                                  |                                  |                                  |                                  |     |
| GSE2585_CD80_HIGH_VS_LOW_MTEC_DN                                       |                                  |                                  |                                  |                                  |     |
|                                                                        | 130                              | 0.20648512                       | 0.8536427                        | 0.81276596                       |     |
| 0.83099014                                                             | 1                                | 2127                             | "tags=18%, list=15%, signal=22%" |                                  |     |
| GSE34156_UNTREATED_VS_6H_NOD2_AND_TLR1_TLR2_LIGAND_TREATED_MONOCYTE_UP |                                  |                                  |                                  |                                  |     |
| GSE34156_UNTREATED_VS_6H_NOD2_AND_TLR1_TLR2_LIGAND_TREATED_MONOCYTE_UP |                                  |                                  |                                  |                                  |     |
|                                                                        | 118                              | 0.21182823                       | 0.8529267                        |                                  |     |
| 0.78688526                                                             | 0.8322162                        | 1                                | 1869                             | "tags=17%, list=13%, signal=19%" |     |
| GSE3982_NKCELL_VS_TH1_UP                                               |                                  |                                  |                                  |                                  | 114 |
| GSE3982_NKCELL_VS_TH1_UP                                               |                                  |                                  |                                  |                                  |     |
| 0.20993385                                                             | 0.85269296                       | 0.7876289                        | 0.8324356                        |                                  |     |
| 1                                                                      | 2155                             | "tags=16%, list=15%, signal=18%" |                                  |                                  |     |
| GSE40493_BCL6_KO_VS_WT_TREG_UP                                         |                                  |                                  |                                  |                                  |     |
| GSE40493_BCL6_KO_VS_WT_TREG_UP                                         |                                  |                                  |                                  |                                  |     |
|                                                                        | 143                              | 0.20816071                       | 0.8507902                        | 0.80728054                       |     |
| 0.83627564                                                             | 1                                | 1943                             | "tags=20%, list=14%, signal=23%" |                                  |     |
| GSE24574_BCL6_LOW_TFH_VS_TCONV_CD4_TCELL_UP                            |                                  |                                  |                                  |                                  |     |
| GSE24574_BCL6_LOW_TFH_VS_TCONV_CD4_TCELL_UP                            |                                  |                                  |                                  |                                  | 136 |
| 0.20920868                                                             | 0.8490218                        | 0.8308026                        | 0.8398647                        |                                  |     |
| 1                                                                      | 2195                             | "tags=17%, list=16%, signal=20%" |                                  |                                  |     |
| GSE360_HIGH_VS_LOW_DOSE_B_MALAYI_DC_UP                                 |                                  |                                  |                                  |                                  |     |
| GSE360_HIGH_VS_LOW_DOSE_B_MALAYI_DC_UP                                 |                                  |                                  |                                  |                                  | 150 |
| 0.2042455                                                              | 0.8484371                        | 0.85333335                       | 0.84079736                       |                                  |     |
| 1                                                                      | 2085                             | "tags=17%, list=15%, signal=20%" |                                  |                                  |     |
| GSE36476_YOUNG_VS_OLD_DONOR_MEMORY_CD4_TCELL_16H_TSST_ACT_DN           |                                  |                                  |                                  |                                  |     |
| GSE36476_YOUNG_VS_OLD_DONOR_MEMORY_CD4_TCELL_16H_TSST_ACT_DN           |                                  |                                  |                                  |                                  |     |
|                                                                        | 127                              | 0.2104014                        | 0.84641933                       | 0.82626265                       |     |
| 0.8447811                                                              | 1                                | 1060                             | "tags=11%, list=8%, signal=12%"  |                                  |     |
| GSE6090_UNSTIM_VS_DC_SIGN_STIM_DC_DN                                   |                                  |                                  |                                  |                                  |     |
| GSE6090_UNSTIM_VS_DC_SIGN_STIM_DC_DN                                   |                                  |                                  |                                  |                                  | 105 |
| 0.21338753                                                             | 0.84590477                       | 0.7995781                        | 0.84556067                       |                                  |     |
| 1                                                                      | 991                              | "tags=10%, list=7%, signal=10%"  |                                  |                                  |     |
| GSE21927_SPLEEN_VS_TUMOR_MONOCYTE_C57BL6_UP                            |                                  |                                  |                                  |                                  |     |
| GSE21927_SPLEEN_VS_TUMOR_MONOCYTE_C57BL6_UP                            |                                  |                                  |                                  |                                  | 112 |
| 0.2129824                                                              | 0.8415679                        | 0.80212766                       | 0.85427034                       |                                  |     |
| 1                                                                      | 1069                             | "tags=8%, list=8%, signal=9%"    |                                  |                                  |     |
| GSE360_DC_VS_MAC_L_MAJOR_UP                                            |                                  |                                  |                                  |                                  |     |
| GSE360_DC_VS_MAC_L_MAJOR_UP                                            |                                  |                                  |                                  |                                  |     |
|                                                                        | 149                              | 0.20159209                       | 0.8400486                        | 0.8523207                        |     |
| 0.85710835                                                             | 1                                | 2670                             | "tags=27%, list=19%, signal=33%" |                                  |     |
| GSE32533_MIR17_KO_VS_MIR17_OVEREXPRESS_ACT_CD4_TCELL_DN                |                                  |                                  |                                  |                                  |     |
| GSE32533_MIR17_KO_VS_MIR17_OVEREXPRESS_ACT_CD4_TCELL_DN                |                                  |                                  |                                  |                                  |     |

134 0.20539756 0.83978266 0.84934497 0.85734  
1 2155 "tags=19%, list=15%, signal=23%"  
GSE34205\_RSV\_VS\_FLU\_INF\_INFANT\_PBMC\_UP  
GSE34205\_RSV\_VS\_FLU\_INF\_INFANT\_PBMC\_UP 108  
0.21207924 0.839697 0.8262712 0.8572059 1  
2669 "tags=21%, list=19%, signal=26%"  
GSE22935\_WT\_VS\_MYD88\_KO\_MACROPHAGE\_48H\_MBOVIS\_BCG\_STIM\_UP  
GSE22935\_WT\_VS\_MYD88\_KO\_MACROPHAGE\_48H\_MBOVIS\_BCG\_STIM\_UP  
160 0.2023106 0.8393727 0.85714287  
0.85753065 1 1220 "tags=11%, list=9%, signal=11%"  
GSE12003\_MIR223\_KO\_VS\_WT\_BM\_PROGENITOR\_4D\_CULTURE\_DN  
GSE12003\_MIR223\_KO\_VS\_WT\_BM\_PROGENITOR\_4D\_CULTURE\_DN  
162 0.19904207 0.83782446 0.8586498  
0.86030227 1 845 "tags=7%, list=6%, signal=7%"  
GSE12707\_AT16L1\_HYPOMORPH\_VS\_WT\_THYMUS\_DN  
GSE12707\_AT16L1\_HYPOMORPH\_VS\_WT\_THYMUS\_DN 95  
0.21566091 0.836975 0.80728054 0.86165434 1  
1983 "tags=15%, list=14%, signal=17%"  
GSE9946\_LISTERIA\_INF\_MATURE\_VS\_PROSTAGLANDINE2\_TREATED\_MATURE\_DC\_UP  
GSE9946\_LISTERIA\_INF\_MATURE\_VS\_PROSTAGLANDINE2\_TREATED\_MATURE\_DC\_UP  
97 0.21458738 0.83448696 0.83503056  
0.86621594 1 3068 "tags=27%, list=22%, signal=34%"  
GSE26488\_WT\_VS\_HDAC7\_DELTAP\_TG\_OT2\_THYMOCYTE\_WITH\_PEPTIDE\_INJECTION\_UP  
GSE26488\_WT\_VS\_HDAC7\_DELTAP\_TG\_OT2\_THYMOCYTE\_WITH\_PEPTIDE\_INJECTION\_UP  
169 0.1955814 0.8337897 0.892057  
0.86728376 1 2222 "tags=18%, list=16%, signal=22%"  
GSE17721\_CPG\_VS\_GARDIQUIMOD\_0.5H\_BMDC\_UP  
GSE17721\_CPG\_VS\_GARDIQUIMOD\_0.5H\_BMDC\_UP 149  
0.20296411 0.83159065 0.8692946 0.871086 1  
2620 "tags=19%, list=19%, signal=23%"  
GSE27786\_NKCELL\_VS\_ERYTHROBLAST\_DN  
GSE27786\_NKCELL\_VS\_ERYTHROBLAST\_DN 138  
0.20166157 0.82672566 0.86070687 0.87979704  
1 3049 "tags=23%, list=22%, signal=29%"  
GSE19888\_CTRL\_VS\_A3R\_ACT\_TREATED\_MAST\_CELL\_PRETREATED\_WITH\_A3R\_INH\_U  
P  
GSE19888\_CTRL\_VS\_A3R\_ACT\_TREATED\_MAST\_CELL\_PRETREATED\_WITH\_A3R\_INH\_U  
P 129 0.20697185 0.8257288  
0.85775864 0.88130134 1 1552 "tags=13%,  
list=11%, signal=15%"  
GSE16385\_IFNG\_TNF\_VS\_ROSIGLITAZONE\_STIM\_MACROPHAGE\_DN  
GSE16385\_IFNG\_TNF\_VS\_ROSIGLITAZONE\_STIM\_MACROPHAGE\_DN  
92 0.21036121 0.82467425 0.8568627  
0.8828805 1 1179 "tags=10%, list=8%, signal=11%"  
GSE29618\_PRE\_VS\_DAY7\_FLU\_VACCINE\_PDC\_UP  
GSE29618\_PRE\_VS\_DAY7\_FLU\_VACCINE\_PDC\_UP 131  
0.20249614 0.8246699 0.85106385 0.88256055  
1 1588 "tags=9%, list=11%, signal=10%"  
GSE34217\_MIR17\_92\_OVEREXPRESS\_VS\_WT\_ACT\_CD8\_TCELL\_DN  
GSE34217\_MIR17\_92\_OVEREXPRESS\_VS\_WT\_ACT\_CD8\_TCELL\_DN  
101 0.21013305 0.8229309 0.82071716  
0.88533914 1 1384 "tags=13%, list=10%, signal=14%"  
GSE13306\_RA\_VS\_UNTREATED\_TCONV\_DN GSE13306\_RA\_VS\_UNTREATED\_TCONV\_DN

|                                                                   |                                  |                                  |                                  |            |
|-------------------------------------------------------------------|----------------------------------|----------------------------------|----------------------------------|------------|
|                                                                   | 140                              | 0.20037048                       | 0.8224713                        | 0.9        |
| 0.8858131                                                         | 1                                | 2424                             | "tags=19%, list=17%, signal=23%" |            |
| GSE21063_CTRL_VS_ANTI_IGM_STIM_BCELL_8H_DN                        |                                  |                                  |                                  |            |
| GSE21063_CTRL_VS_ANTI_IGM_STIM_BCELL_8H_DN                        |                                  |                                  |                                  |            |
|                                                                   |                                  |                                  |                                  | 129        |
| 0.20023245                                                        | 0.8222917                        | 0.8565217                        | 0.8858038                        |            |
| 1                                                                 | 1375                             | "tags=10%, list=10%, signal=11%" |                                  |            |
| GSE16385_UNTREATED_VS_12H_ROSIGLITAZONE_IL4_TREATED_MACROPHAGE_DN |                                  |                                  |                                  |            |
| GSE16385_UNTREATED_VS_12H_ROSIGLITAZONE_IL4_TREATED_MACROPHAGE_DN |                                  |                                  |                                  |            |
|                                                                   | 142                              | 0.19852982                       | 0.8139777                        | 0.9154013  |
| 0.89969045                                                        | 1                                | 2593                             | "tags=23%, list=18%, signal=27%" |            |
| GSE22935_UNSTIM_VS_24H_MBOVIS_BCG_STIM_MACROPHAGE_UP              |                                  |                                  |                                  |            |
| GSE22935_UNSTIM_VS_24H_MBOVIS_BCG_STIM_MACROPHAGE_UP              |                                  |                                  |                                  |            |
| 164                                                               | 0.19427617                       | 0.80769676                       | 0.9107505                        |            |
| 0.9094226                                                         | 1                                | 2051                             | "tags=16%, list=15%, signal=18%" |            |
| GSE20715_0H_VS_24H_OZONE_LUNG_DN                                  |                                  |                                  |                                  |            |
| GSE20715_0H_VS_24H_OZONE_LUNG_DN                                  |                                  |                                  |                                  |            |
|                                                                   | 162                              | 0.19171421                       | 0.8069058                        | 0.93509126 |
| 0.9103444                                                         | 1                                | 1766                             | "tags=13%, list=13%, signal=15%" |            |
| GSE5589_IL6_KO_VS_IL10_KO_LPS_STIM_MACROPHAGE_180MIN_DN           |                                  |                                  |                                  |            |
| GSE5589_IL6_KO_VS_IL10_KO_LPS_STIM_MACROPHAGE_180MIN_DN           |                                  |                                  |                                  |            |
| 136                                                               | 0.19377974                       | 0.8030202                        | 0.9077869                        |            |
| 0.91594696                                                        | 1                                | 2434                             | "tags=21%, list=17%, signal=25%" |            |
| GSE27786_CD8_TCELL_VS_ERYTHROBLAST_DN                             |                                  |                                  |                                  |            |
| GSE27786_CD8_TCELL_VS_ERYTHROBLAST_DN                             |                                  |                                  |                                  |            |
|                                                                   |                                  |                                  |                                  | 143        |
| 0.19085312                                                        | 0.7880321                        | 0.9147982                        | 0.93607724                       |            |
| 1                                                                 | 1894                             | "tags=13%, list=13%, signal=15%" |                                  |            |
| GSE17721_0.5H_VS_24H_LPS_BMDC_DN                                  |                                  |                                  |                                  |            |
| GSE17721_0.5H_VS_24H_LPS_BMDC_DN                                  |                                  |                                  |                                  |            |
|                                                                   | 161                              | 0.1846351                        | 0.78757286                       | 0.94871795 |
| 0.9362831                                                         | 2350                             | "tags=22%, list=17%, signal=26%" |                                  |            |
| GSE13485_CTRL_VS_DAY21_YF17D_VACCINE_PPMC_DN                      |                                  |                                  |                                  |            |
| GSE13485_CTRL_VS_DAY21_YF17D_VACCINE_PPMC_DN                      |                                  |                                  |                                  |            |
|                                                                   |                                  |                                  |                                  | 87         |
| 0.20585592                                                        | 0.7830442                        | 0.89837396                       | 0.9414331                        |            |
| 1                                                                 | 1091                             | "tags=7%, list=8%, signal=7%"    |                                  |            |
| GSE29949_MICROGLIA_BRAIN_VS_CD8_NEG_DC_SPLEEN_DN                  |                                  |                                  |                                  |            |
| GSE29949_MICROGLIA_BRAIN_VS_CD8_NEG_DC_SPLEEN_DN                  |                                  |                                  |                                  |            |
|                                                                   |                                  |                                  |                                  | 150        |
| 0.18959819                                                        | 0.781142                         | 0.9303279                        | 0.94334394                       | 1          |
| 2271                                                              | "tags=16%, list=16%, signal=19%" |                                  |                                  |            |
| GSE16385_IFNG_TNF_VS_IL4_STIM_MACROPHAGE_DN                       |                                  |                                  |                                  |            |
| GSE16385_IFNG_TNF_VS_IL4_STIM_MACROPHAGE_DN                       |                                  |                                  |                                  |            |
|                                                                   |                                  |                                  |                                  | 117        |
| 0.19386706                                                        | 0.7683445                        | 0.9275053                        | 0.9565512                        |            |
| 1                                                                 | 1503                             | "tags=10%, list=11%, signal=11%" |                                  |            |
| GSE16385_UNTREATED_VS_12H_IFNG_TNF_TREATED_MACROPHAGE_UP          |                                  |                                  |                                  |            |
| GSE16385_UNTREATED_VS_12H_IFNG_TNF_TREATED_MACROPHAGE_UP          |                                  |                                  |                                  |            |
| 112                                                               | 0.19122058                       | 0.76605153                       | 0.92440605                       |            |
| 0.9583625                                                         | 1                                | 2733                             | "tags=21%, list=19%, signal=25%" |            |
| GSE3982_BASOPHIL_VS_NKCELL_DN                                     |                                  |                                  |                                  |            |
| GSE3982_BASOPHIL_VS_NKCELL_DN                                     |                                  |                                  |                                  |            |
|                                                                   | 133                              | 0.18404186                       | 0.7616463                        | 0.94218415 |
| 0.9620657                                                         | 1                                | 2211                             | "tags=17%, list=16%, signal=19%" |            |
| GSE27786_NKTCELL_VS_ERYTHROBLAST_DN                               |                                  |                                  |                                  |            |
| GSE27786_NKTCELL_VS_ERYTHROBLAST_DN                               |                                  |                                  |                                  |            |
|                                                                   |                                  |                                  |                                  | 147        |
| 0.1839853                                                         | 0.7543453                        | 0.9734694                        | 0.9677886                        |            |
| 1                                                                 | 2331                             | "tags=16%, list=17%, signal=19%" |                                  |            |
| GSE29949_MICROGLIA_BRAIN_VS_CD8_POS_DC_SPLEEN_DN                  |                                  |                                  |                                  |            |
| GSE29949_MICROGLIA_BRAIN_VS_CD8_POS_DC_SPLEEN_DN                  |                                  |                                  |                                  |            |
|                                                                   |                                  |                                  |                                  | 147        |
| 0.18175477                                                        | 0.74779797                       | 0.96385545                       | 0.9722985                        |            |

|                                                                 |            |                                  |                                  |     |
|-----------------------------------------------------------------|------------|----------------------------------|----------------------------------|-----|
| 1                                                               | 574        | "tags=5%, list=4%, signal=5%"    |                                  |     |
| GSE29615_DAY3_VS_DAY7_LAIV_FLU_VACCINE_PBMC_UP                  |            |                                  |                                  |     |
| GSE29615_DAY3_VS_DAY7_LAIV_FLU_VACCINE_PBMC_UP                  |            |                                  |                                  | 105 |
| 0.1897453                                                       | 0.74705607 | 0.9471459                        | 0.97245723                       |     |
| 1                                                               | 1866       | "tags=14%, list=13%, signal=16%" |                                  |     |
| GSE37301_HEMATOPOIETIC_STEM_CELL_VS_CD4_TCELL_DN                |            |                                  |                                  |     |
| GSE37301_HEMATOPOIETIC_STEM_CELL_VS_CD4_TCELL_DN                |            |                                  |                                  | 103 |
| 0.18497925                                                      | 0.7294479  | 0.96255505                       | 0.98272717                       |     |
| 1                                                               | 1330       | "tags=9%, list=9%, signal=10%"   |                                  |     |
| GSE13411_IGM_VS_SWITCHED_MEMORY_BCELL_UP                        |            |                                  |                                  |     |
| GSE13411_IGM_VS_SWITCHED_MEMORY_BCELL_UP                        |            |                                  |                                  | 141 |
| 0.17626245                                                      | 0.72719085 | 0.9801762                        | 0.9835604                        |     |
| 1                                                               | 2346       | "tags=16%, list=17%, signal=19%" |                                  |     |
| GSE42088_UNINF_VS_LEISHMANIA_INF_DC_8H_DN                       |            |                                  |                                  |     |
| GSE42088_UNINF_VS_LEISHMANIA_INF_DC_8H_DN                       |            |                                  |                                  | 133 |
| 0.17737232                                                      | 0.7246296  | 0.9812108                        | 0.98443484                       |     |
| 1                                                               | 866        | "tags=6%, list=6%, signal=6%"    |                                  |     |
| GSE46606_DAY1_VS_DAY3_CD40L_IL2_IL5_STIMULATED_IRF4_KO_BCELL_UP |            |                                  |                                  |     |
| GSE46606_DAY1_VS_DAY3_CD40L_IL2_IL5_STIMULATED_IRF4_KO_BCELL_UP |            |                                  |                                  | 140 |
| 0.17293112                                                      | 0.7223269  | 0.9840319                        |                                  |     |
| 0.9851657                                                       | 1          | 2997                             | "tags=24%, list=21%, signal=30%" |     |
| GSE29614_CTRL_VS_DAY3_TIV_FLU_VACCINE_PBMC_DN                   |            |                                  |                                  |     |
| GSE29614_CTRL_VS_DAY3_TIV_FLU_VACCINE_PBMC_DN                   |            |                                  |                                  | 94  |
| 0.18378517                                                      | 0.7154978  | 0.9762419                        | 0.9875933                        |     |
| 1                                                               | 520        | "tags=5%, list=4%, signal=5%"    |                                  |     |
| GSE14413_UNSTIM_VS_IFNB_STIM_NIH3T3_CELLS_UP                    |            |                                  |                                  |     |
| GSE14413_UNSTIM_VS_IFNB_STIM_NIH3T3_CELLS_UP                    |            |                                  |                                  | 100 |
| 0.17895718                                                      | 0.7138004  | 0.9715536                        | 0.9878777                        |     |
| 1                                                               | 2765       | "tags=20%, list=20%, signal=25%" |                                  |     |
| GSE36476_YOUNG_VS_OLD_DONOR_MEMORY_CD4_TCELL_40H_TSST_ACT_UP    |            |                                  |                                  |     |
| GSE36476_YOUNG_VS_OLD_DONOR_MEMORY_CD4_TCELL_40H_TSST_ACT_UP    |            |                                  |                                  | 135 |
| 0.17270543                                                      | 0.7102981  | 0.98523206                       |                                  |     |
| 0.9887368                                                       | 1          | 2003                             | "tags=12%, list=14%, signal=14%" |     |
| GSE29949_CD8_NEG_DC_SPLEEN_VS_CD8_POS_DC_SPLEEN_UP              |            |                                  |                                  |     |
| GSE29949_CD8_NEG_DC_SPLEEN_VS_CD8_POS_DC_SPLEEN_UP              |            |                                  |                                  | 151 |
| 0.16725545                                                      | 0.7005419  | 0.99139786                       | 0.9915586                        |     |
| 1                                                               | 1990       | "tags=11%, list=14%, signal=13%" |                                  |     |
| GSE5589_WT_VS_IL6_KO_LPS_STIM_MACROPHAGE_180MIN_DN              |            |                                  |                                  |     |
| GSE5589_WT_VS_IL6_KO_LPS_STIM_MACROPHAGE_180MIN_DN              |            |                                  |                                  | 98  |
| 0.17432027                                                      | 0.68715227 | 0.9800885                        | 0.9944106                        |     |
| 1                                                               | 1538       | "tags=11%, list=11%, signal=13%" |                                  |     |
| GSE13522_WT_VS_IFNG_KO_SKIN_DN                                  |            |                                  |                                  |     |
| GSE13522_WT_VS_IFNG_KO_SKIN_DN                                  |            |                                  |                                  | 94  |
| 0.17327182                                                      | 0.6787835  | 0.9934924                        |                                  |     |
| 0.9956143                                                       | 1          | 2122                             | "tags=16%, list=15%, signal=19%" |     |
| GSE9946_MATURE_STIMULATORY_VS_LISTERIA_INF_MATURE_DC_DN         |            |                                  |                                  |     |
| GSE9946_MATURE_STIMULATORY_VS_LISTERIA_INF_MATURE_DC_DN         |            |                                  |                                  | 95  |
| 0.17041332                                                      | 0.65935177 | 0.99602383                       |                                  |     |
| 0.9978767                                                       | 1          | 2003                             | "tags=15%, list=14%, signal=17%" |     |
| GSE14413_UNSTIM_VS_IFNB_STIM_L929_CELLS_DN                      |            |                                  |                                  |     |
| GSE14413_UNSTIM_VS_IFNB_STIM_L929_CELLS_DN                      |            |                                  |                                  | 89  |
| 0.1685827                                                       | 0.63843125 | 0.9918033                        | 0.9990974                        |     |
| 1                                                               | 639        | "tags=6%, list=5%, signal=6%"    |                                  |     |
| GSE14026_TH1_VS_TH17_UP                                         |            |                                  |                                  |     |
| GSE14026_TH1_VS_TH17_UP                                         |            |                                  |                                  | 135 |
| 0.1506534                                                       | 0.6205012  | 1                                | 0.9994897                        | 1   |

2920 "tags=22%, list=21%, signal=28%"  
GSE11367\_CTRL\_VS\_IL17\_TREATED\_SMOOTH\_MUSCLE\_CELL\_UP  
GSE11367\_CTRL\_VS\_IL17\_TREATED\_SMOOTH\_MUSCLE\_CELL\_UP  
101 0.117878236 0.4598367 1 0.99999917  
1 2644 "tags=14%, list=19%, signal=17%"

Table S5B

| NAME                                                  | GS<br>NES                        | follow link to MSigDB<br>NOM p-val | GS DETAILS<br>FDR q-val           | SIZE<br>FWER p-val |
|-------------------------------------------------------|----------------------------------|------------------------------------|-----------------------------------|--------------------|
| RANK AT MAX                                           | LEADING EDGE                     |                                    |                                   |                    |
| GSE14415_NATURAL_TREG_VS_FOXP3_KO_NATURAL_TREG_DN     |                                  |                                    |                                   |                    |
| GSE14415_NATURAL_TREG_VS_FOXP3_KO_NATURAL_TREG_DN     |                                  |                                    | Details ...                       |                    |
| 116                                                   | -0.7920045                       | -3.1605818                         | 0                                 | 0                  |
| 1856                                                  | "tags=73%, list=13%, signal=84%" |                                    |                                   |                    |
| GSE14415_INDUCED_VS_NATURAL_TREG_UP                   |                                  |                                    |                                   |                    |
| GSE14415_INDUCED_VS_NATURAL_TREG_UP                   |                                  |                                    | Details ...                       |                    |
| 115                                                   | -0.7845523                       | -3.1368103                         | 0                                 | 0                  |
| 1883                                                  | "tags=70%, list=13%, signal=81%" |                                    |                                   |                    |
| GSE13547_WT_VS_ZFX_KO_BCELL_UP                        |                                  |                                    | GSE13547_WT_VS_ZFX_KO_BCELL_UP    |                    |
| Details ...                                           | 122                              | -0.73388404                        | -2.9528754                        | 0                  |
| 0                                                     | 0                                | 1258                               | "tags=50%, list=9%, signal=54%"   |                    |
| GSE15330_HSC_VS_MEGAKARYOCYTE_ERYTHROID_PROGENITOR_UP |                                  |                                    |                                   |                    |
| GSE15330_HSC_VS_MEGAKARYOCYTE_ERYTHROID_PROGENITOR_UP |                                  |                                    |                                   |                    |
| Details ...                                           | 125                              | -0.6965992                         | -2.807849                         | 0                  |
| 0                                                     | 0                                | 1437                               | "tags=49%, list=10%, signal=54%"  |                    |
| GSE13547_CTRL_VS_ANTI_IGM_STIM_ZFX_KO_BCELL_12H_UP    |                                  |                                    |                                   |                    |
| GSE13547_CTRL_VS_ANTI_IGM_STIM_ZFX_KO_BCELL_12H_UP    |                                  |                                    | Details ...                       |                    |
| 107                                                   | -0.70223194                      | -2.8053808                         | 0                                 | 0                  |
| 2469                                                  | "tags=63%, list=17%, signal=75%" |                                    |                                   |                    |
| GSE14699_NAIVE_VS_DELETIONAL_TOLERANCE_CD8_TCELL_UP   |                                  |                                    |                                   |                    |
| GSE14699_NAIVE_VS_DELETIONAL_TOLERANCE_CD8_TCELL_UP   |                                  |                                    |                                   |                    |
| Details ...                                           | 113                              | -0.7080644                         | -2.7982972                        | 0                  |
| 0                                                     | 0                                | 1414                               | "tags=50%, list=10%, signal=55%"  |                    |
| GSE13547_CTRL_VS_ANTI_IGM_STIM_ZFX_KO_BCELL_12H_DN    |                                  |                                    |                                   |                    |
| GSE13547_CTRL_VS_ANTI_IGM_STIM_ZFX_KO_BCELL_12H_DN    |                                  |                                    | Details ...                       |                    |
| 118                                                   | -0.6795874                       | -2.711070                          | 0                                 | 0                  |
| 1437                                                  | "tags=45%, list=10%, signal=50%" |                                    |                                   |                    |
| GSE14415_FOXP3_KO_NATURAL_TREG_VS_TCONV_UP            |                                  |                                    |                                   |                    |
| GSE14415_FOXP3_KO_NATURAL_TREG_VS_TCONV_UP            |                                  |                                    | Details ...                       |                    |
| 130                                                   | -0.65910107                      | -2.702069                          | 0                                 | 0                  |
| 1535                                                  | "tags=46%, list=11%, signal=51%" |                                    |                                   |                    |
| GOLDRATH_EFF_VS_MEMORY_CD8_TCELL_DN                   |                                  |                                    |                                   |                    |
| GOLDRATH_EFF_VS_MEMORY_CD8_TCELL_DN                   |                                  |                                    | Details ...                       |                    |
| 150                                                   | -0.64228404                      | -2.693487                          | 0                                 | 0                  |
| 1500                                                  | "tags=40%, list=11%, signal=44%" |                                    |                                   |                    |
| GSE13547_2H_VS_12_H_ANTI_IGM_STIM_ZFX_KO_BCELL_UP     |                                  |                                    |                                   |                    |
| GSE13547_2H_VS_12_H_ANTI_IGM_STIM_ZFX_KO_BCELL_UP     |                                  |                                    | Details ...                       |                    |
| 118                                                   | -0.6657932                       | -2.6603973                         | 0                                 | 0                  |
| 1591                                                  | "tags=47%, list=11%, signal=52%" |                                    |                                   |                    |
| GSE9650_NAIVE_VS_EFF_CD8_TCELL_UP                     |                                  |                                    | GSE9650_NAIVE_VS_EFF_CD8_TCELL_UP |                    |
| Details ...                                           | 156                              | -0.631967                          | -2.6433086                        | 0                  |
| 0                                                     | 0                                | 1424                               | "tags=39%, list=10%, signal=43%"  |                    |
| GSE40068_BCL6_POS_VS_NEG_CXCR5_POS_TFH_DN             |                                  |                                    |                                   |                    |
| GSE40068_BCL6_POS_VS_NEG_CXCR5_POS_TFH_DN             |                                  |                                    | Details ...                       |                    |
| 132                                                   | -0.64637655                      | -2.6399653                         | 0                                 | 0                  |
| 1610                                                  | "tags=47%, list=11%, signal=53%" |                                    |                                   |                    |
| GSE14699_NAIVE_VS_ACT_CD8_TCELL_DN                    |                                  |                                    |                                   |                    |
| GSE14699_NAIVE_VS_ACT_CD8_TCELL_DN                    |                                  |                                    | Details ...                       |                    |
| 136                                                   | -0.6289371                       | -2.583616                          | 0                                 | 0                  |
| 1435                                                  | "tags=44%, list=10%, signal=49%" |                                    |                                   |                    |



|                                                                                  |                                   |            |                                  |             |   |
|----------------------------------------------------------------------------------|-----------------------------------|------------|----------------------------------|-------------|---|
| GSE14415_INDUCED_TREG_VS_TCONV_DN                                                | GSE14415_INDUCED_TREG_VS_TCONV_DN |            |                                  |             |   |
| Details ...                                                                      | 122                               | -0.6482624 | -2.5814164                       | 0           |   |
| 0                                                                                | 0                                 | 1704       | "tags=50%, list=12%, signal=56%" |             |   |
| KAECH_NAIVE_VS_DAY8_EFF_CD8_TCELL_UP                                             |                                   |            |                                  |             |   |
| KAECH_NAIVE_VS_DAY8_EFF_CD8_TCELL_UP                                             |                                   |            |                                  | Details ... |   |
| 158                                                                              | -0.620211                         | -2.5668218 | 0                                | 0           | 0 |
| 1435                                                                             |                                   |            | "tags=39%, list=10%, signal=43%" |             |   |
| GSE33162_UNTREATED_VS_4H_LPS_STIM_HDAC3_HET_MACROPHAGE_UP                        |                                   |            |                                  |             |   |
| GSE33162_UNTREATED_VS_4H_LPS_STIM_HDAC3_HET_MACROPHAGE_UP                        |                                   |            |                                  |             |   |
| Details ...                                                                      | 154                               | -0.6143706 | -2.5665185                       | 0           |   |
| 0                                                                                | 0                                 | 1509       | "tags=36%, list=11%, signal=40%" |             |   |
| GSE3920_IFNA_VS_IFNG_TREATED_ENDOTHELIAL_CELL_UP                                 |                                   |            |                                  |             |   |
| GSE3920_IFNA_VS_IFNG_TREATED_ENDOTHELIAL_CELL_UP                                 |                                   |            |                                  | Details ... |   |
| 127                                                                              | -0.63924104                       | -2.565320  | 0                                | 0           |   |
| 3190                                                                             |                                   |            | "tags=61%, list=23%, signal=78%" |             |   |
| GSE15750_DAY6_VS_DAY10_EFF_CD8_TCELL_DN                                          |                                   |            |                                  |             |   |
| GSE15750_DAY6_VS_DAY10_EFF_CD8_TCELL_DN                                          |                                   |            |                                  | Details ... |   |
| 133                                                                              | -0.62883496                       | -2.5613303 | 0                                | 0           | 0 |
| 2101                                                                             |                                   |            | "tags=45%, list=15%, signal=53%" |             |   |
| GSE14415_ACT_VS_CTRL_NATURAL_TREG_DN                                             |                                   |            |                                  |             |   |
| GSE14415_ACT_VS_CTRL_NATURAL_TREG_DN                                             |                                   |            |                                  | Details ... |   |
| 128                                                                              | -0.63416433                       | -2.546876  | 0                                | 0           | 0 |
| 1679                                                                             |                                   |            | "tags=41%, list=12%, signal=46%" |             |   |
| GSE20727_H202_VS_ROS_INHIBITOR_TREATED_DC_DN                                     |                                   |            |                                  |             |   |
| GSE20727_H202_VS_ROS_INHIBITOR_TREATED_DC_DN                                     |                                   |            |                                  | Details ... |   |
| 142                                                                              | -0.6074251                        | -2.5127246 | 0                                | 0           | 0 |
| 1779                                                                             |                                   |            | "tags=39%, list=13%, signal=45%" |             |   |
| GSE15750_DAY6_VS_DAY10_TRAF6KO_EFF_CD8_TCELL_DN                                  |                                   |            |                                  |             |   |
| GSE15750_DAY6_VS_DAY10_TRAF6KO_EFF_CD8_TCELL_DN                                  |                                   |            |                                  |             |   |
| 141                                                                              | -0.6086538                        | -2.5051148 | 0                                | 0           | 0 |
| 2312                                                                             |                                   |            | "tags=49%, list=16%, signal=58%" |             |   |
| GOLDRATH_NAIVE_VS_EFF_CD8_TCELL_UP                                               |                                   |            |                                  |             |   |
| GOLDRATH_NAIVE_VS_EFF_CD8_TCELL_UP                                               |                                   |            |                                  |             |   |
| 151                                                                              | -0.60138685                       | -2.4974768 | 0                                | 0           | 0 |
| 1740                                                                             |                                   |            | "tags=43%, list=12%, signal=49%" |             |   |
| GSE33162_UNTREATED_VS_4H_LPS_STIM_HDAC3_HET_MACROPHAGE_DN                        |                                   |            |                                  |             |   |
| GSE33162_UNTREATED_VS_4H_LPS_STIM_HDAC3_HET_MACROPHAGE_DN                        |                                   |            |                                  |             |   |
| 152                                                                              | -0.5962253                        | -2.4951632 | 0                                | 0           | 0 |
| 1625                                                                             |                                   |            | "tags=36%, list=12%, signal=40%" |             |   |
| GSE13547_WT_VS_ZFX_KO_BCELL_ANTI_IGM_STIM_2H_DN                                  |                                   |            |                                  |             |   |
| GSE13547_WT_VS_ZFX_KO_BCELL_ANTI_IGM_STIM_2H_DN                                  |                                   |            |                                  |             |   |
| 119                                                                              | -0.62349457                       | -2.4949677 | 0                                | 0           | 0 |
| 2943                                                                             |                                   |            | "tags=54%, list=21%, signal=67%" |             |   |
| GSE9650_EFFECTOR_VS_MEMORY_CD8_TCELL_DN                                          |                                   |            |                                  |             |   |
| GSE9650_EFFECTOR_VS_MEMORY_CD8_TCELL_DN                                          |                                   |            |                                  |             |   |
| 156                                                                              | -0.59121096                       | -2.4929132 | 0                                | 0           | 0 |
| 1585                                                                             |                                   |            | "tags=40%, list=11%, signal=44%" |             |   |
| GSE19888_CTRL_VS_A3R_INHIBITOR_TREATED_MAST_CELL_DN                              |                                   |            |                                  |             |   |
| GSE19888_CTRL_VS_A3R_INHIBITOR_TREATED_MAST_CELL_DN                              |                                   |            |                                  |             |   |
| 129                                                                              | -0.6117933                        | -2.4816866 | 0                                | 0           | 0 |
| 2419                                                                             |                                   |            | "tags=46%, list=17%, signal=55%" |             |   |
| GSE15330_LYMPHOID_MULTIPOTENT_VS_MEGAKARYOCYTE_ERYTHROID_PROGENITOR_IKAROS_KO_UP |                                   |            |                                  |             |   |
| GSE15330_LYMPHOID_MULTIPOTENT_VS_MEGAKARYOCYTE_ERYTHROID_PROGENITOR_IKAROS_KO_UP |                                   |            |                                  |             |   |

|                                                                                                    |                                  |                                  |                                 |                                  |   |
|----------------------------------------------------------------------------------------------------|----------------------------------|----------------------------------|---------------------------------|----------------------------------|---|
| IKAROS_KO_UP                                                                                       | 132                              | -0.60986847                      | -2.4799666                      |                                  |   |
| 0                                                                                                  | 0                                | 0                                | 1437                            | "tags=42%, list=10%, signal=46%" |   |
| GSE40068_CXCR5POS_BCL6POS_TFH_VS_CXCR5NEG_BCL6NEG_CD4_TCELL_UP                                     |                                  |                                  |                                 |                                  |   |
| GSE40068_CXCR5POS_BCL6POS_TFH_VS_CXCR5NEG_BCL6NEG_CD4_TCELL_UP                                     | 146                              | -0.5957934                       | -2.4718382                      | 0                                | 0 |
| 0                                                                                                  | 1779                             | "tags=42%, list=13%, signal=47%" |                                 |                                  |   |
| GSE15330_HSC_VS_MEGAKARYOCYTE_ERYTHROID_PROGENITOR_DN                                              |                                  |                                  |                                 |                                  |   |
| GSE15330_HSC_VS_MEGAKARYOCYTE_ERYTHROID_PROGENITOR_DN                                              | 125                              | -0.61609095                      | -2.4651613                      | 0                                | 0 |
| 1437                                                                                               | "tags=42%, list=10%, signal=46%" |                                  |                                 |                                  |   |
| KAECH_DAY8_EFF_VS_MEMORY_CD8_TCELL_DN                                                              |                                  |                                  |                                 |                                  |   |
| KAECH_DAY8_EFF_VS_MEMORY_CD8_TCELL_DN                                                              | 150                              | -0.5915394                       | -2.4542527                      | 0                                | 0 |
| 1509                                                                                               | "tags=39%, list=11%, signal=44%" |                                  |                                 |                                  |   |
| GSE40274_CTRL_VS_EOS_TRANSDUCE_ACTIVATED_CD4_TCELL_DN                                              |                                  |                                  |                                 |                                  |   |
| GSE40274_CTRL_VS_EOS_TRANSDUCE_ACTIVATED_CD4_TCELL_DN                                              | 115                              | -0.6144799                       | -2.4520206                      | 0                                | 0 |
| 1833                                                                                               | "tags=40%, list=13%, signal=46%" |                                  |                                 |                                  |   |
| GSE40068_CXCR5POS_BCL6POS_TFH_VS_CXCR5NEG_BCL6NEG_CD4_TCELL_DN                                     |                                  |                                  |                                 |                                  |   |
| GSE40068_CXCR5POS_BCL6POS_TFH_VS_CXCR5NEG_BCL6NEG_CD4_TCELL_DN                                     | 157                              | -0.58192754                      | -2.449242                       | 0                                | 0 |
| 0                                                                                                  | 2174                             | "tags=43%, list=15%, signal=51%" |                                 |                                  |   |
| GSE39110_UNTREATED_VS_IL2_TREATED_CD8_TCELL_DAY6_POST_IMMUNIZATION_DN                              |                                  |                                  |                                 |                                  |   |
| GSE39110_UNTREATED_VS_IL2_TREATED_CD8_TCELL_DAY6_POST_IMMUNIZATION_DN                              | 139                              | -0.60133344                      | -2.435259                       | 0                                |   |
| 0                                                                                                  | 0                                | 1288                             | "tags=35%, list=9%, signal=38%" |                                  |   |
| GSE13946_CTRL_VS_DSS_COLITIS_GD_TCELL_FROM_COLON_DN                                                |                                  |                                  |                                 |                                  |   |
| GSE13946_CTRL_VS_DSS_COLITIS_GD_TCELL_FROM_COLON_DN                                                | 134                              | -0.5928245                       | -2.424504                       | 0                                | 0 |
| 1435                                                                                               | "tags=40%, list=10%, signal=44%" |                                  |                                 |                                  |   |
| GSE39110_DAY3_VS_DAY6_POST_IMMUNIZATION_CD8_TCELL_UP                                               |                                  |                                  |                                 |                                  |   |
| GSE39110_DAY3_VS_DAY6_POST_IMMUNIZATION_CD8_TCELL_UP                                               | 142                              | -0.58643067                      | -2.4179509                      | 0                                | 0 |
| 1726                                                                                               | "tags=37%, list=12%, signal=42%" |                                  |                                 |                                  |   |
| GSE14415_INDUCED_TREG_VS_FOXP3_KO_INDUCED_TREG_UP                                                  |                                  |                                  |                                 |                                  |   |
| GSE14415_INDUCED_TREG_VS_FOXP3_KO_INDUCED_TREG_UP                                                  | 138                              | -0.5784511                       | -2.389455                       | 0                                | 0 |
| 1397                                                                                               | "tags=38%, list=10%, signal=42%" |                                  |                                 |                                  |   |
| GSE2770_UNTREATED_VS_ACT_CD4_TCELL_6H_DN                                                           |                                  |                                  |                                 |                                  |   |
| GSE2770_UNTREATED_VS_ACT_CD4_TCELL_6H_DN                                                           | 133                              | -0.58293545                      | -2.3849335                      | 0                                | 0 |
| 1591                                                                                               | "tags=34%, list=11%, signal=38%" |                                  |                                 |                                  |   |
| GSE10239_NAIVE_VS_DAY4.5_EFF_CD8_TCELL_UP                                                          |                                  |                                  |                                 |                                  |   |
| GSE10239_NAIVE_VS_DAY4.5_EFF_CD8_TCELL_UP                                                          | 135                              | -0.5845982                       | -2.3520055                      | 0                                | 0 |
| 1277                                                                                               | "tags=35%, list=9%, signal=38%"  |                                  |                                 |                                  |   |
| GSE19888_ADENOSINE_A3R_INH_PRETREAT_AND_ACT_BY_A3R_VS_A3R_INH_AND_TCELL_MEMBRANES_ACT_MAST_CELL_UP |                                  |                                  |                                 |                                  |   |
| GSE19888_ADENOSINE_A3R_INH_PRETREAT_AND_ACT_BY_A3R_VS_A3R_INH_AND_TCELL_MEMBRANES_ACT_MAST_CELL_UP | 133                              | -0.5728688                       | -2.3414397                      | 0                                | 0 |
| 1796                                                                                               | "tags=41%, list=13%, signal=46%" |                                  |                                 |                                  |   |
| GSE39110_UNTREATED_VS_IL2_TREATED_CD8_TCELL_DAY3_POST_IMMUNIZATION_U                               |                                  |                                  |                                 |                                  |   |

P

|                                                                      |      |             |                                  |   |   |
|----------------------------------------------------------------------|------|-------------|----------------------------------|---|---|
| GSE39110_UNTREATED_VS_IL2_TREATED_CD8_TCELL_DAY3_POST_IMMUNIZATION_U |      |             |                                  |   |   |
| P                                                                    | 136  | -0.56684196 | -2.3389866                       | 0 |   |
| 0                                                                    | 0    | 1830        | "tags=36%, list=13%, signal=41%" |   |   |
| GSE11386_NAIVE_VS_MEMORY_BCELL_DN                                    |      |             |                                  |   |   |
| GSE11386_NAIVE_VS_MEMORY_BCELL_DN                                    | 122  | -0.5750599  | -2.335291                        | 0 | 0 |
| 0                                                                    | 1445 |             | "tags=38%, list=10%, signal=42%" |   |   |
| KAECH_NAIVE_VS_DAY15_EFF_CD8_TCELL_UP                                |      |             |                                  |   |   |
| KAECH_NAIVE_VS_DAY15_EFF_CD8_TCELL_UP                                | 159  | -0.56162095 | -2.3331335                       | 0 | 0 |
| 1435                                                                 |      |             | "tags=35%, list=10%, signal=38%" |   |   |
| GSE40274_FOXP3_VS_FOXP3_AND_PBX1_TRANSDUCED_ACTIVATED_CD4_TCELL_DN   |      |             |                                  |   |   |
| GSE40274_FOXP3_VS_FOXP3_AND_PBX1_TRANSDUCED_ACTIVATED_CD4_TCELL_DN   | 150  | -0.5631535  | -2.3232806                       | 0 | 0 |
| 0                                                                    | 2397 |             | "tags=45%, list=17%, signal=54%" |   |   |
| GSE13547_WT_VS_ZFX_KO_BCELL_ANTI_IGM_STIM_12H_DN                     |      |             |                                  |   |   |
| GSE13547_WT_VS_ZFX_KO_BCELL_ANTI_IGM_STIM_12H_DN                     | 119  | -0.5782173  | -2.3226357                       | 0 | 0 |
| 1135                                                                 |      |             | "tags=32%, list=8%, signal=34%"  |   |   |
| GSE36078_WT_VS_IL1R_KO_LUNG_DC_AFTER_AD5_INF_DN                      |      |             |                                  |   |   |
| GSE36078_WT_VS_IL1R_KO_LUNG_DC_AFTER_AD5_INF_DN                      | 151  | -0.55560154 | -2.3158097                       | 0 | 0 |
| 2169                                                                 |      |             | "tags=44%, list=15%, signal=51%" |   |   |
| GSE19941_LPS_VS_LPS_AND_IL10_STIM_IL10_KO_MACROPHAGE_DN              |      |             |                                  |   |   |
| GSE19941_LPS_VS_LPS_AND_IL10_STIM_IL10_KO_MACROPHAGE_DN              | 109  | -0.5809035  | -2.2920947                       | 0 | 0 |
| 1895                                                                 |      |             | "tags=44%, list=13%, signal=50%" |   |   |
| GSE14769_UNSTIM_VS_40MIN_LPS_BMDM_DN                                 |      |             |                                  |   |   |
| GSE14769_UNSTIM_VS_40MIN_LPS_BMDM_DN                                 | 152  | -0.5485254  | -2.2885516                       | 0 | 0 |
| 1776                                                                 |      |             | "tags=39%, list=13%, signal=45%" |   |   |
| KAECH_DAY8_EFF_VS_DAY15_EFF_CD8_TCELL_DN                             |      |             |                                  |   |   |
| KAECH_DAY8_EFF_VS_DAY15_EFF_CD8_TCELL_DN                             | 150  | -0.55680007 | -2.2883444                       | 0 | 0 |
| 1509                                                                 |      |             | "tags=37%, list=11%, signal=41%" |   |   |
| GSE14415_INDUCED_TREG_VS_FOXP3_KO_INDUCED_TREG_IL2_CULTURE_UP        |      |             |                                  |   |   |
| GSE14415_INDUCED_TREG_VS_FOXP3_KO_INDUCED_TREG_IL2_CULTURE_UP        | 142  | -0.5457511  | -2.2837431                       | 0 | 0 |
| 0                                                                    | 903  |             | "tags=31%, list=6%, signal=33%"  |   |   |
| GSE15930_NAIVE_VS_48H_IN_VITRO_STIM_CD8_TCELL_UP                     |      |             |                                  |   |   |
| GSE15930_NAIVE_VS_48H_IN_VITRO_STIM_CD8_TCELL_UP                     | 148  | -0.55392563 | -2.2784965                       | 0 | 0 |
| 1980                                                                 |      |             | "tags=37%, list=14%, signal=43%" |   |   |
| GSE9650_EFFECTOR_VS_EXHAUSTED_CD8_TCELL_DN                           |      |             |                                  |   |   |
| GSE9650_EFFECTOR_VS_EXHAUSTED_CD8_TCELL_DN                           | 157  | -0.5415937  | -2.2548301                       | 0 | 0 |
| 2297                                                                 |      |             | "tags=37%, list=16%, signal=44%" |   |   |
| GSE40274_FOXP3_VS_FOXP3_AND_GATA1_TRANSDUCED_ACTIVATED_CD4_TCELL_DN  |      |             |                                  |   |   |
| GSE40274_FOXP3_VS_FOXP3_AND_GATA1_TRANSDUCED_ACTIVATED_CD4_TCELL_DN  | 150  | -0.5453015  | -2.242668                        | 0 | 0 |
| 0                                                                    | 2468 |             | "tags=44%, list=17%, signal=53%" |   |   |
| GSE36891_POLYIC_TLR3_VS_PAM_TLR2_STIM_PERITONEAL_MACROPHAGE_UP       |      |             |                                  |   |   |
| GSE36891_POLYIC_TLR3_VS_PAM_TLR2_STIM_PERITONEAL_MACROPHAGE_UP       | 121  | -0.557561   | -2.227713                        | 0 | 0 |

|                                                                         |                                  |                                  |                                  |   |   |
|-------------------------------------------------------------------------|----------------------------------|----------------------------------|----------------------------------|---|---|
| 0                                                                       | 2671                             | "tags=43%, list=19%, signal=53%" |                                  |   |   |
| GSE40274_FOXP3_VS_FOXP3_AND_HELIOS_TRANSDUCED_ACTIVATED_CD4_TCELL_DN    |                                  |                                  |                                  |   |   |
| GSE40274_FOXP3_VS_FOXP3_AND_HELIOS_TRANSDUCED_ACTIVATED_CD4_TCELL_DN    |                                  |                                  |                                  |   |   |
|                                                                         | 95                               | -0.56621265                      | -2.2239773                       | 0 |   |
| 0                                                                       | 0                                | 1592                             | "tags=38%, list=11%, signal=42%" |   |   |
| GSE2935_UV_INACTIVATED_VS_LIVE_SENDAI_VIRUS_INF_MACROPHAGE_UP           |                                  |                                  |                                  |   |   |
| GSE2935_UV_INACTIVATED_VS_LIVE_SENDAI_VIRUS_INF_MACROPHAGE_UP           |                                  |                                  |                                  |   |   |
|                                                                         | 145                              | -0.53928113                      | -2.2210987                       | 0 | 0 |
| 0                                                                       | 1775                             | "tags=38%, list=13%, signal=43%" |                                  |   |   |
| GSE21670_TGFB_VS_IL6_TREATED_STAT3_KO_CD4_TCELL_UP                      |                                  |                                  |                                  |   |   |
| GSE21670_TGFB_VS_IL6_TREATED_STAT3_KO_CD4_TCELL_UP                      |                                  |                                  |                                  |   |   |
| 126                                                                     | -0.54753584                      | -2.2203841                       | 0                                | 0 | 0 |
| 2035                                                                    | "tags=34%, list=14%, signal=40%" |                                  |                                  |   |   |
| GSE14415_ACT_TCONV_VS_ACT_NATURAL_TREG_UP                               |                                  |                                  |                                  |   |   |
| GSE14415_ACT_TCONV_VS_ACT_NATURAL_TREG_UP                               |                                  |                                  |                                  |   |   |
| 139                                                                     | -0.5312784                       | -2.1947093                       | 0                                | 0 | 0 |
| 1435                                                                    | "tags=32%, list=10%, signal=36%" |                                  |                                  |   |   |
| GSE37301_PRO_BCELL_VS_CD4_TCELL_DN                                      |                                  |                                  |                                  |   |   |
| GSE37301_PRO_BCELL_VS_CD4_TCELL_DN                                      |                                  |                                  |                                  |   |   |
| 125                                                                     | -0.5380688                       | -2.1930177                       | 0                                | 0 | 0 |
| 1546                                                                    | "tags=28%, list=11%, signal=31%" |                                  |                                  |   |   |
| GSE39110_DAY3_VS_DAY6_POST_IMMUNIZATION_CD8_TCELL_WITH_IL2_TREATMENT_DN |                                  |                                  |                                  |   |   |
| GSE39110_DAY3_VS_DAY6_POST_IMMUNIZATION_CD8_TCELL_WITH_IL2_TREATMENT_DN |                                  |                                  |                                  |   |   |
|                                                                         | 146                              | -0.52773595                      | -2.187285                        | 0 |   |
| 0                                                                       | 0                                | 1580                             | "tags=34%, list=11%, signal=38%" |   |   |
| GSE17974_0H_VS_24H_IN_VITRO_ACT_CD4_TCELL_UP                            |                                  |                                  |                                  |   |   |
| GSE17974_0H_VS_24H_IN_VITRO_ACT_CD4_TCELL_UP                            |                                  |                                  |                                  |   |   |
| 109                                                                     | -0.54748213                      | -2.1613684                       | 0                                | 0 | 0 |
| 1856                                                                    | "tags=35%, list=13%, signal=40%" |                                  |                                  |   |   |
| GSE38304_MYC_NEG_VS_POS_GC_BCELL_UP                                     |                                  |                                  |                                  |   |   |
| GSE38304_MYC_NEG_VS_POS_GC_BCELL_UP                                     |                                  |                                  |                                  |   |   |
| 161                                                                     | -0.5194925                       | -2.1546118                       | 0                                | 0 | 0 |
| 1459                                                                    | "tags=33%, list=10%, signal=36%" |                                  |                                  |   |   |
| GSE17974_1.5H_VS_72H_IL4_AND_ANTI_IL12_ACT_CD4_TCELL_UP                 |                                  |                                  |                                  |   |   |
| GSE17974_1.5H_VS_72H_IL4_AND_ANTI_IL12_ACT_CD4_TCELL_UP                 |                                  |                                  |                                  |   |   |
| 126                                                                     | -0.5331048                       | -2.1544347                       | 0                                | 0 | 0 |
| 2352                                                                    | "tags=43%, list=17%, signal=51%" |                                  |                                  |   |   |
| GSE3920_UNTREATED_VS_IFNG_TREATED_FIBROBLAST_DN                         |                                  |                                  |                                  |   |   |
| GSE3920_UNTREATED_VS_IFNG_TREATED_FIBROBLAST_DN                         |                                  |                                  |                                  |   |   |
| 135                                                                     | -0.52955097                      | -2.1427555                       | 0                                | 0 | 0 |
| 2476                                                                    | "tags=41%, list=18%, signal=49%" |                                  |                                  |   |   |
| GSE5142_HTERT_TRANSDUCED_VS_CTRL_CD8_TCELL_LATE_PASSAGE_CLONE_DN        |                                  |                                  |                                  |   |   |
| GSE5142_HTERT_TRANSDUCED_VS_CTRL_CD8_TCELL_LATE_PASSAGE_CLONE_DN        |                                  |                                  |                                  |   |   |
|                                                                         | 140                              | -0.5166635                       | -2.1351824                       | 0 | 0 |
| 0                                                                       | 2139                             | "tags=38%, list=15%, signal=44%" |                                  |   |   |
| GSE16450_IMMATURE_VS_MATURE_NEURON_CELL_LINE_6H_IFNA_STIM_UP            |                                  |                                  |                                  |   |   |
| GSE16450_IMMATURE_VS_MATURE_NEURON_CELL_LINE_6H_IFNA_STIM_UP            |                                  |                                  |                                  |   |   |
|                                                                         | 142                              | -0.51842004                      | -2.1302893                       | 0 | 0 |
| 0                                                                       | 1697                             | "tags=25%, list=12%, signal=29%" |                                  |   |   |
| GSE21670_UNTREATED_VS_TGFB_TREATED_CD4_TCELL_DN                         |                                  |                                  |                                  |   |   |
| GSE21670_UNTREATED_VS_TGFB_TREATED_CD4_TCELL_DN                         |                                  |                                  |                                  |   |   |
| 148                                                                     | -0.51635283                      | -2.1223447                       | 0                                | 0 | 0 |

|                                                                             |                                  |            |                                  |          |       |
|-----------------------------------------------------------------------------|----------------------------------|------------|----------------------------------|----------|-------|
| 1663                                                                        | "tags=28%, list=12%, signal=32%" |            |                                  |          |       |
| GSE17974_CTRL_VS_ACT_IL4_AND_ANTI_IL12_12H_CD4_TCELL_UP                     |                                  |            |                                  |          |       |
| GSE17974_CTRL_VS_ACT_IL4_AND_ANTI_IL12_12H_CD4_TCELL_UP                     |                                  |            |                                  |          |       |
| 116                                                                         | -0.52484226                      | -2.1101696 | 0                                | 0        | 0     |
| 1856                                                                        | "tags=35%, list=13%, signal=40%" |            |                                  |          |       |
| GSE7460_TREG_VS_TCONV_ACT_WITH_TGFB_UP                                      |                                  |            |                                  |          |       |
| GSE7460_TREG_VS_TCONV_ACT_WITH_TGFB_UP                                      |                                  |            |                                  |          |       |
| 151                                                                         | -0.50799066                      | -2.1040955 | 0                                | 0        | 0     |
| 2085                                                                        | "tags=35%, list=15%, signal=41%" |            |                                  |          |       |
| GSE36078_UNTREATED_VS_AD5_INF_IL1R_KO_MOUSE_LUNG_DC_UP                      |                                  |            |                                  |          |       |
| GSE36078_UNTREATED_VS_AD5_INF_IL1R_KO_MOUSE_LUNG_DC_UP                      |                                  |            |                                  |          |       |
| 139                                                                         | -0.5048025                       | -2.0860074 | 0                                | 0        | 0     |
| 2647                                                                        | "tags=40%, list=19%, signal=49%" |            |                                  |          |       |
| GSE9650_NAIVE_VS_MEMORY_CD8_TCELL_UP                                        |                                  |            |                                  |          |       |
| GSE9650_NAIVE_VS_MEMORY_CD8_TCELL_UP                                        |                                  |            |                                  |          |       |
| 151                                                                         | -0.50124764                      | -2.0846174 | 0                                | 0        | 0     |
| 1780                                                                        | "tags=34%, list=13%, signal=39%" |            |                                  |          |       |
| GSE40277_GATA1_AND_SATB1_TRANSDUCECD_VS_CTRL_CD4_TCELL_DN                   |                                  |            |                                  |          |       |
| GSE40277_GATA1_AND_SATB1_TRANSDUCECD_VS_CTRL_CD4_TCELL_DN                   |                                  |            |                                  |          |       |
| 142                                                                         | -0.51090306                      | -2.0796504 | 0                                | 0        | 0     |
| 2528                                                                        | "tags=40%, list=18%, signal=48%" |            |                                  |          |       |
| GSE3720_VD1_VS_VD2_GAMMADELTA_TCELL_WITH_LPS_STIM_UP                        |                                  |            |                                  |          |       |
| GSE3720_VD1_VS_VD2_GAMMADELTA_TCELL_WITH_LPS_STIM_UP                        |                                  |            |                                  |          |       |
| 142                                                                         | -0.4980894                       | -2.0715783 | 0                                | 0        | 0     |
| 1784                                                                        | "tags=36%, list=13%, signal=41%" |            |                                  |          |       |
| GSE5679_CTRL_VS_RARA_AAGONIST_AM580_TREATED_DC_DN                           |                                  |            |                                  |          |       |
| GSE5679_CTRL_VS_RARA_AAGONIST_AM580_TREATED_DC_DN                           |                                  |            |                                  |          |       |
| 145                                                                         | -0.50175625                      | -2.071555  | 0                                | 0        | 0     |
| 2312                                                                        | "tags=39%, list=16%, signal=46%" |            |                                  |          |       |
| GSE7460_FOXP3_MUT_VS_WT_ACT_WITH_TGFB_TCONV_DN                              |                                  |            |                                  |          |       |
| GSE7460_FOXP3_MUT_VS_WT_ACT_WITH_TGFB_TCONV_DN                              |                                  |            |                                  |          |       |
| 144                                                                         | -0.49893                         | -2.0677054 | 0                                | 0        | 0     |
| 1459                                                                        | "tags=31%, list=10%, signal=34%" |            |                                  |          |       |
| GSE27241_CTRL_VS_DIGOXIN_TREATED_CD4_TCELL_IN_TH17_POLARIZING_CONDITIONS_UP |                                  |            |                                  |          |       |
| GSE27241_CTRL_VS_DIGOXIN_TREATED_CD4_TCELL_IN_TH17_POLARIZING_CONDITIONS_UP |                                  |            |                                  |          |       |
| 124                                                                         | -0.5134458                       | -2.062391  | 0                                |          |       |
| 0                                                                           | 0                                | 1979       | "tags=32%, list=14%, signal=37%" |          |       |
| GSE43863_TH1_VS_LY6C_INT_CXCR5POS_EFFECTOR_CD4_TCELL_DN                     |                                  |            |                                  |          |       |
| GSE43863_TH1_VS_LY6C_INT_CXCR5POS_EFFECTOR_CD4_TCELL_DN                     |                                  |            |                                  |          |       |
| 144                                                                         | -0.50202614                      | -2.0606759 | 0                                | 0        | 0     |
| 1460                                                                        | "tags=32%, list=10%, signal=35%" |            |                                  |          |       |
| GSE18893_TCONV_VS_TREG_2H_TNF_STIM_DN                                       |                                  |            |                                  |          |       |
| GSE18893_TCONV_VS_TREG_2H_TNF_STIM_DN                                       |                                  |            |                                  |          |       |
| 110                                                                         | -0.52309555                      | -2.0604196 | 0                                | 0        | 0     |
| 1803                                                                        | "tags=33%, list=13%, signal=37%" |            |                                  |          |       |
| GSE2770_UNTREATED_VS_ACT_CD4_TCELL_2H_UP                                    |                                  |            |                                  |          |       |
| GSE2770_UNTREATED_VS_ACT_CD4_TCELL_2H_UP                                    |                                  |            |                                  |          |       |
| 135                                                                         | -0.50621295                      | -2.0550065 | 0                                | 1.07E-05 | 0.001 |
| 2272                                                                        | "tags=39%, list=16%, signal=45%" |            |                                  |          |       |
| GSE18791_CTRL_VS_NEWCASTLE_VIRUS_DC_2H_DN                                   |                                  |            |                                  |          |       |
| GSE18791_CTRL_VS_NEWCASTLE_VIRUS_DC_2H_DN                                   |                                  |            |                                  |          |       |
| 104                                                                         | -0.5224027                       | -2.0547254 | 0                                | 1.06E-05 | 0.001 |
| 2088                                                                        | "tags=40%, list=15%, signal=47%" |            |                                  |          |       |

GSE36078\_UNTREATED\_VS\_AD5\_T425A\_HEXON\_INF\_MOUSE\_LUNG\_DC\_UP  
GSE36078\_UNTREATED\_VS\_AD5\_T425A\_HEXON\_INF\_MOUSE\_LUNG\_DC\_UP  
143 -0.4977823 -2.0531762 0 1.04E-05 0.001  
2532 "tags=37%, list=18%, signal=45%"  
KAECH\_NAIVE\_VS\_MEMORY\_CD8\_TCELL\_UP  
KAECH\_NAIVE\_VS\_MEMORY\_CD8\_TCELL\_UP  
150 -0.4904864 -2.0515137 0 1.03E-05 0.001  
1780 "tags=34%, list=13%, signal=38%"  
GSE17974\_CTRL\_VS\_ACT\_IL4\_AND\_ANTI\_IL12\_24H\_CD4\_TCELL\_UP  
GSE17974\_CTRL\_VS\_ACT\_IL4\_AND\_ANTI\_IL12\_24H\_CD4\_TCELL\_UP  
119 -0.5101287 -2.0445297 0 1.02E-05 0.001  
1796 "tags=31%, list=13%, signal=35%"  
GSE24142\_ADULT\_VS\_FETAL\_DN3\_THYMOCYTE\_UP  
GSE24142\_ADULT\_VS\_FETAL\_DN3\_THYMOCYTE\_UP  
149 -0.4868879 -2.0444221 0 1.01E-05 0.001  
1769 "tags=32%, list=13%, signal=36%"  
GSE20727\_H202\_VS\_ROS\_INHIBITOR\_TREATED\_DC\_UP  
GSE20727\_H202\_VS\_ROS\_INHIBITOR\_TREATED\_DC\_UP  
144 -0.49649495 -2.0414984 0 9.94E-06 0.001  
1790 "tags=34%, list=13%, signal=39%"  
GSE4590\_SMALL\_VS\_VPREB\_POS\_LARGE\_PRE\_BCELL\_UP  
GSE4590\_SMALL\_VS\_VPREB\_POS\_LARGE\_PRE\_BCELL\_UP  
124 -0.5083874 -2.0400062 0 9.83E-06 0.001  
1941 "tags=34%, list=14%, signal=39%"  
GSE7568\_IL4\_VS\_IL4\_AND\_DEXAMETHASONE\_TREATED\_MACROPHAGE\_DN  
GSE7568\_IL4\_VS\_IL4\_AND\_DEXAMETHASONE\_TREATED\_MACROPHAGE\_DN  
117 -0.50572276 -2.0266025 0 9.71E-06 0.001  
2081 "tags=40%, list=15%, signal=47%"  
GSE10239\_NAIVE\_VS\_KLRG1HIGH\_EFF\_CD8\_TCELL\_UP  
GSE10239\_NAIVE\_VS\_KLRG1HIGH\_EFF\_CD8\_TCELL\_UP  
138 -0.4971928 -2.0223482 0 9.60E-06 0.001  
1509 "tags=30%, list=11%, signal=34%"  
GSE19941\_UNSTIM\_VS\_LPS\_AND\_IL10\_STIM\_IL10\_KO\_NFKBP50\_KO\_MACROPHAGE\_U  
P  
GSE19941\_UNSTIM\_VS\_LPS\_AND\_IL10\_STIM\_IL10\_KO\_NFKBP50\_KO\_MACROPHAGE\_U  
P  
129 -0.49560422 -2.0143943 0  
9.49E-06 0.001 1737 "tags=28%, list=12%, signal=32%"  
GSE34179\_THPOK\_KO\_VS\_WT\_VA14I\_NKTCELL\_UP  
GSE34179\_THPOK\_KO\_VS\_WT\_VA14I\_NKTCELL\_UP  
132 -0.49024674 -2.0110896 0 9.39E-06 0.001  
1980 "tags=28%, list=14%, signal=32%"  
GSE14769\_UNSTIM\_VS\_80MIN\_LPS\_BMDM\_DN  
GSE14769\_UNSTIM\_VS\_80MIN\_LPS\_BMDM\_DN  
150 -0.48262945 -2.005419 0 9.28E-06 0.001  
3811 "tags=49%, list=27%, signal=67%"  
GSE7852\_LN\_VS\_THYMUS\_TCONV\_UP GSE7852\_LN\_VS\_THYMUS\_TCONV\_UP  
138 -0.49276036 -2.004537 0 9.18E-06  
0.001 1691 "tags=33%, list=12%, signal=38%"  
GSE24142\_ADULT\_VS\_FETAL\_EARLY\_THYMIC\_PROGENITOR\_UP  
GSE24142\_ADULT\_VS\_FETAL\_EARLY\_THYMIC\_PROGENITOR\_UP  
154 -0.48719388 -2.0014734 0 9.08E-06 0.001  
1848 "tags=30%, list=13%, signal=34%"  
GSE14769\_UNSTIM\_VS\_60MIN\_LPS\_BMDM\_DN  
GSE14769\_UNSTIM\_VS\_60MIN\_LPS\_BMDM\_DN

|                                                                                    |                                  |                                  |                                  |                                  |       |
|------------------------------------------------------------------------------------|----------------------------------|----------------------------------|----------------------------------|----------------------------------|-------|
| 154                                                                                | -0.47639263                      | -1.9983352                       | 0                                | 8.98E-06                         | 0.001 |
| 2193                                                                               | "tags=37%, list=16%, signal=43%" |                                  |                                  |                                  |       |
| GSE37532_WT_VS_PPARG_KO_LN_TCONV_UP                                                |                                  |                                  |                                  |                                  |       |
| GSE37532_WT_VS_PPARG_KO_LN_TCONV_UP                                                |                                  |                                  |                                  |                                  |       |
| 136                                                                                | -0.4837034                       | -1.9957852                       | 0                                | 8.89E-06                         | 0.001 |
| 1371                                                                               | "tags=31%, list=10%, signal=34%" |                                  |                                  |                                  |       |
| GSE21063_CTRL_VS_ANTI_IGM_STIM_BCELL_NFATC1_KO_3H_DN                               |                                  |                                  |                                  |                                  |       |
| GSE21063_CTRL_VS_ANTI_IGM_STIM_BCELL_NFATC1_KO_3H_DN                               |                                  |                                  |                                  |                                  |       |
| 116                                                                                | -0.49512774                      | -1.9882954                       | 0                                | 1.76E-05                         | 0.002 |
| 1928                                                                               | "tags=33%, list=14%, signal=38%" |                                  |                                  |                                  |       |
| GSE5455_HEALTHY_VS_TUMOR_BEARING_MOUSE_SPLEEN_MONOCYTE_24H_INCUBATION_UP           |                                  |                                  |                                  |                                  |       |
| GSE5455_HEALTHY_VS_TUMOR_BEARING_MOUSE_SPLEEN_MONOCYTE_24H_INCUBATION_UP           |                                  |                                  |                                  |                                  |       |
|                                                                                    | 147                              | -0.48224577                      | -1.9864553                       | 0                                |       |
| 1.75E-05                                                                           | 0.002                            | 2267                             | "tags=37%, list=16%, signal=44%" |                                  |       |
| GSE14415_NATURAL_TREG_VS_FOXP3_KO_NATURAL_TREG_UP                                  |                                  |                                  |                                  |                                  |       |
| GSE14415_NATURAL_TREG_VS_FOXP3_KO_NATURAL_TREG_UP                                  |                                  |                                  |                                  |                                  |       |
| 113                                                                                | -0.49847847                      | -1.9846256                       | 0                                | 1.73E-05                         | 0.002 |
| 1823                                                                               | "tags=32%, list=13%, signal=36%" |                                  |                                  |                                  |       |
| GSE17974_0H_VS_48H_IN_VITRO_ACT_CD4_TCELL_UP                                       |                                  |                                  |                                  |                                  |       |
| GSE17974_0H_VS_48H_IN_VITRO_ACT_CD4_TCELL_UP                                       |                                  |                                  |                                  |                                  |       |
| 109                                                                                | -0.49980432                      | -1.9804904                       | 0.001845019                      | 2.55E-05                         |       |
| 0.003                                                                              | 1796                             | "tags=33%, list=13%, signal=38%" |                                  |                                  |       |
| GSE25146_UNSTIM_VS_HELIOBACTER_PYLORI_LPS_STIM_AGS_CELL_DN                         |                                  |                                  |                                  |                                  |       |
| GSE25146_UNSTIM_VS_HELIOBACTER_PYLORI_LPS_STIM_AGS_CELL_DN                         |                                  |                                  |                                  |                                  |       |
| 125                                                                                | -0.49395218                      | -1.9797726                       | 0                                | 2.52E-05                         | 0.003 |
| 1726                                                                               | "tags=34%, list=12%, signal=38%" |                                  |                                  |                                  |       |
| GSE37533_UNTREATED_VS_PIOGLIZATONE_TREATED_CD4_TCELL_PPARG2_AND_FOXP3_TRASDUCED_UP |                                  |                                  |                                  |                                  |       |
| GSE37533_UNTREATED_VS_PIOGLIZATONE_TREATED_CD4_TCELL_PPARG2_AND_FOXP3_TRASDUCED_UP |                                  |                                  |                                  |                                  |       |
|                                                                                    | 111                              | -0.5002202                       | -1.9791722                       |                                  |       |
| 0                                                                                  | 2.50E-05                         | 0.003                            | 3452                             | "tags=42%, list=24%, signal=56%" |       |
| GSE24671_CTRL_VS_BAKIMULC_INFECTED_MOUSE_SPLENOCYTES_DN                            |                                  |                                  |                                  |                                  |       |
| GSE24671_CTRL_VS_BAKIMULC_INFECTED_MOUSE_SPLENOCYTES_DN                            |                                  |                                  |                                  |                                  |       |
| 132                                                                                | -0.4854279                       | -1.977853                        | 0                                | 2.47E-05                         | 0.003 |
| 1937                                                                               | "tags=34%, list=14%, signal=39%" |                                  |                                  |                                  |       |
| GSE7460_CTRL_VS_TGFB_TREATED_ACT_CD8_TCELL_DN                                      |                                  |                                  |                                  |                                  |       |
| GSE7460_CTRL_VS_TGFB_TREATED_ACT_CD8_TCELL_DN                                      |                                  |                                  |                                  |                                  |       |
| 135                                                                                | -0.48070166                      | -1.9777474                       | 0                                | 2.45E-05                         | 0.003 |
| 1141                                                                               | "tags=23%, list=8%, signal=25%"  |                                  |                                  |                                  |       |
| GSE11961_GERMINAL_CENTER_BCELL_DAY7_VS_GERMINAL_CENTER_BCELL_DAY40_DN              |                                  |                                  |                                  |                                  |       |
| GSE11961_GERMINAL_CENTER_BCELL_DAY7_VS_GERMINAL_CENTER_BCELL_DAY40_DN              |                                  |                                  |                                  |                                  |       |
|                                                                                    | 138                              | -0.4767416                       | -1.9774413                       | 0                                |       |
| 2.43E-05                                                                           | 0.003                            | 3190                             | "tags=46%, list=23%, signal=58%" |                                  |       |
| GSE20366_EX_VIVO_VS_DEC205_CONVERSION_DN                                           |                                  |                                  |                                  |                                  |       |
| GSE20366_EX_VIVO_VS_DEC205_CONVERSION_DN                                           |                                  |                                  |                                  |                                  |       |
| 135                                                                                | -0.4902983                       | -1.9732864                       | 0                                | 2.40E-05                         | 0.003 |
| 1638                                                                               | "tags=33%, list=12%, signal=37%" |                                  |                                  |                                  |       |
| GSE14350_TREG_VS_TEFF_UP                                                           |                                  |                                  |                                  |                                  |       |
| GSE14350_TREG_VS_TEFF_UP                                                           |                                  |                                  |                                  |                                  |       |
| 130                                                                                | -0.48523003                      | -1.9720023                       | 0                                | 2.38E-05                         | 0.003 |
| 1532                                                                               | "tags=28%, list=11%, signal=32%" |                                  |                                  |                                  |       |
| GSE23505_IL6_IL1_VS_IL6_IL1_TGFB_TREATED_CD4_TCELL_UP                              |                                  |                                  |                                  |                                  |       |
| GSE23505_IL6_IL1_VS_IL6_IL1_TGFB_TREATED_CD4_TCELL_UP                              |                                  |                                  |                                  |                                  |       |

|                                                                  |                                  |            |   |          |       |
|------------------------------------------------------------------|----------------------------------|------------|---|----------|-------|
| 133                                                              | -0.47794363                      | -1.9685946 | 0 | 3.16E-05 | 0.004 |
| 2043                                                             | "tags=28%, list=14%, signal=32%" |            |   |          |       |
| GSE20366_TREG_VS_NAIVE_CD4_TCELL_HOMEOSTATIC_CONVERSION_DN       |                                  |            |   |          |       |
| GSE20366_TREG_VS_NAIVE_CD4_TCELL_HOMEOSTATIC_CONVERSION_DN       |                                  |            |   |          |       |
| 151                                                              | -0.4762983                       | -1.9632642 | 0 | 3.13E-05 | 0.004 |
| 1414                                                             | "tags=28%, list=10%, signal=31%" |            |   |          |       |
| GSE10239_NAIVE_VS_KLRG1INT_EFF_CD8_TCELL_UP                      |                                  |            |   |          |       |
| GSE10239_NAIVE_VS_KLRG1INT_EFF_CD8_TCELL_UP                      |                                  |            |   |          |       |
| 131                                                              | -0.4812607                       | -1.9620762 | 0 | 3.10E-05 | 0.004 |
| 1533                                                             | "tags=29%, list=11%, signal=32%" |            |   |          |       |
| GSE17974_CTRL_VS_ACT_IL4_AND_ANTI_IL12_6H_CD4_TCELL_UP           |                                  |            |   |          |       |
| GSE17974_CTRL_VS_ACT_IL4_AND_ANTI_IL12_6H_CD4_TCELL_UP           |                                  |            |   |          |       |
| 116                                                              | -0.48734453                      | -1.9593487 | 0 | 3.07E-05 | 0.004 |
| 1277                                                             | "tags=29%, list=9%, signal=32%"  |            |   |          |       |
| GSE8678_IL7R_LOW_VS_HIGH_EFF_CD8_TCELL_DN                        |                                  |            |   |          |       |
| GSE8678_IL7R_LOW_VS_HIGH_EFF_CD8_TCELL_DN                        |                                  |            |   |          |       |
| 143                                                              | -0.47840375                      | -1.9588841 | 0 | 3.81E-05 | 0.005 |
| 1392                                                             | "tags=27%, list=10%, signal=30%" |            |   |          |       |
| GSE15324_ELF4_KO_VS_WT_ACTIVATED_CD8_TCELL_UP                    |                                  |            |   |          |       |
| GSE15324_ELF4_KO_VS_WT_ACTIVATED_CD8_TCELL_UP                    |                                  |            |   |          |       |
| 146                                                              | -0.47886178                      | -1.9566467 | 0 | 3.77E-05 | 0.005 |
| 1872                                                             | "tags=30%, list=13%, signal=34%" |            |   |          |       |
| GSE14386_UNTREATED_VS_IFNA_TREATED_ACT_PBMC_MS_PATIENT_DN        |                                  |            |   |          |       |
| GSE14386_UNTREATED_VS_IFNA_TREATED_ACT_PBMC_MS_PATIENT_DN        |                                  |            |   |          |       |
| 125                                                              | -0.4803927                       | -1.9551392 | 0 | 3.74E-05 | 0.005 |
| 1498                                                             | "tags=30%, list=11%, signal=34%" |            |   |          |       |
| GSE17974_CTRL_VS_ACT_IL4_AND_ANTI_IL12_72H_CD4_TCELL_UP          |                                  |            |   |          |       |
| GSE17974_CTRL_VS_ACT_IL4_AND_ANTI_IL12_72H_CD4_TCELL_UP          |                                  |            |   |          |       |
| 124                                                              | -0.4821644                       | -1.949261  | 0 | 4.46E-05 | 0.006 |
| 1856                                                             | "tags=35%, list=13%, signal=40%" |            |   |          |       |
| GSE11961_UNSTIM_VS_ANTI_IGM_AND_CD40_STIM_6H_FOLLICULAR_BCELL_DN |                                  |            |   |          |       |
| GSE11961_UNSTIM_VS_ANTI_IGM_AND_CD40_STIM_6H_FOLLICULAR_BCELL_DN |                                  |            |   |          |       |
| 147                                                              | -0.4772322                       | -1.9465133 | 0 | 4.42E-05 | 0.006 |
| 1397                                                             | "tags=29%, list=10%, signal=32%" |            |   |          |       |
| GSE2706_R848_VS_R848_AND_LPS_2H_STIM_DC_DN                       |                                  |            |   |          |       |
| GSE2706_R848_VS_R848_AND_LPS_2H_STIM_DC_DN                       |                                  |            |   |          |       |
| 124                                                              | -0.48629445                      | -1.9454728 | 0 | 4.38E-05 | 0.006 |
| 1415                                                             | "tags=26%, list=10%, signal=28%" |            |   |          |       |
| GSE14350_IL2RB_KO_VS_WT_TEFF_UP                                  |                                  |            |   |          |       |
| GSE14350_IL2RB_KO_VS_WT_TEFF_UP                                  |                                  |            |   |          |       |
| 156                                                              | -0.4641211                       | -1.9451172 | 0 | 4.34E-05 | 0.006 |
| 1379                                                             | "tags=29%, list=10%, signal=32%" |            |   |          |       |
| GSE17974_CTRL_VS_ACT_IL4_AND_ANTI_IL12_48H_CD4_TCELL_UP          |                                  |            |   |          |       |
| GSE17974_CTRL_VS_ACT_IL4_AND_ANTI_IL12_48H_CD4_TCELL_UP          |                                  |            |   |          |       |
| 105                                                              | -0.48746765                      | -1.944893  | 0 | 4.30E-05 | 0.006 |
| 1982                                                             | "tags=32%, list=14%, signal=37%" |            |   |          |       |
| GSE21670_TGFB_VS_TGFB_AND_IL6_TREATED_STAT3_KO_CD4_TCELL_UP      |                                  |            |   |          |       |
| GSE21670_TGFB_VS_TGFB_AND_IL6_TREATED_STAT3_KO_CD4_TCELL_UP      |                                  |            |   |          |       |
| 131                                                              | -0.46941835                      | -1.9338766 | 0 | 5.68E-05 | 0.008 |
| 1726                                                             | "tags=29%, list=12%, signal=33%" |            |   |          |       |
| GSE7460_FOXP3_MUT_VS_WT_ACT_TCONV_DN                             |                                  |            |   |          |       |
| GSE7460_FOXP3_MUT_VS_WT_ACT_TCONV_DN                             |                                  |            |   |          |       |
| 148                                                              | -0.47044086                      | -1.9325032 | 0 | 6.35E-05 | 0.008 |
| 1459                                                             | "tags=30%, list=10%, signal=34%" |            |   |          |       |
| GSE42021_TREG_PLN_VS_CD24HI_TREG_THYMUS_UP                       |                                  |            |   |          |       |



|                                                                      |                |                                  |                                  |   |                |
|----------------------------------------------------------------------|----------------|----------------------------------|----------------------------------|---|----------------|
| GSE42021_TREG_PLN_VS_CD24HI_TREG_THYMUS_UP                           | 165            | -0.4592268                       | -1.9314227                       | 0 | 6.29E-05 0.008 |
|                                                                      | 2159           | "tags=32%, list=15%, signal=37%" |                                  |   |                |
| GSE25123_CTRL_VS_IL4_AND_ROSIGLITAZONE_STIM_PPARG_KO_MACROPHAGE_DN   |                |                                  |                                  |   |                |
| GSE25123_CTRL_VS_IL4_AND_ROSIGLITAZONE_STIM_PPARG_KO_MACROPHAGE_DN   | 137            | -0.4721956                       | -1.927797                        | 0 | 6.24E-05       |
|                                                                      | 0.008          | 2324                             | "tags=39%, list=16%, signal=47%" |   |                |
| GSE37301_CD4_TCELL_VS_GRANULOCYTE_MONOCYTE_PROGENITOR_DN             |                |                                  |                                  |   |                |
| GSE37301_CD4_TCELL_VS_GRANULOCYTE_MONOCYTE_PROGENITOR_DN             | 156            | -0.4608469                       | -1.927765                        | 0 | 6.19E-05 0.008 |
|                                                                      | 1362           | "tags=26%, list=10%, signal=29%" |                                  |   |                |
| GSE22229_UNTREATED_VS_IMMUNOSUPP_THERAPY_RENAL_TRANSPLANT_PATIENT_PB |                |                                  |                                  |   |                |
| MC_DN                                                                |                |                                  |                                  |   |                |
| GSE22229_UNTREATED_VS_IMMUNOSUPP_THERAPY_RENAL_TRANSPLANT_PATIENT_PB |                |                                  |                                  |   |                |
| MC_DN                                                                | 148            | -0.46660966                      | -1.9268565                       | 0 |                |
|                                                                      | 6.82E-05 0.008 | 2113                             | "tags=28%, list=15%, signal=32%" |   |                |
| GSE39916_B_CELL_SPLEEN_VS_PLASMA_CELL_BONE_MARROW_UP                 |                |                                  |                                  |   |                |
| GSE39916_B_CELL_SPLEEN_VS_PLASMA_CELL_BONE_MARROW_UP                 | 151            | -0.4677802                       | -1.9239699                       | 0 | 6.77E-05 0.008 |
|                                                                      | 1492           | "tags=27%, list=11%, signal=30%" |                                  |   |                |
| GSE8921_UNSTIM_VS_TLR1_2_STIM_MONOCYTE_24H_UP                        |                |                                  |                                  |   |                |
| GSE8921_UNSTIM_VS_TLR1_2_STIM_MONOCYTE_24H_UP                        | 140            | -0.4685067                       | -1.9223025                       | 0 | 7.39E-05 0.009 |
|                                                                      | 2130           | "tags=35%, list=15%, signal=41%" |                                  |   |                |
| GSE7460_TREG_VS_TCONV_ACT_UP                                         |                |                                  |                                  |   |                |
| GSE7460_TREG_VS_TCONV_ACT_UP                                         | 140            | -0.47009012                      | -1.9156157                       | 0 | 7.34E-05       |
|                                                                      | 0.009          | 2386                             | "tags=37%, list=17%, signal=44%" |   |                |
| GSE411_UNSTIM_VS_400MIN_IL6_STIM_MACROPHAGE_UP                       |                |                                  |                                  |   |                |
| GSE411_UNSTIM_VS_400MIN_IL6_STIM_MACROPHAGE_UP                       | 129            | -0.47205856                      | -1.914355                        | 0 | 7.28E-05 0.009 |
|                                                                      | 2485           | "tags=33%, list=18%, signal=40%" |                                  |   |                |
| GSE20366_EX_VIVO_VS_HOMEOSTATIC_CONVERSION_TREG_UP                   |                |                                  |                                  |   |                |
| GSE20366_EX_VIVO_VS_HOMEOSTATIC_CONVERSION_TREG_UP                   | 137            | -0.4636352                       | -1.9112283                       | 0 | 8.54E-05 0.011 |
|                                                                      | 2152           | "tags=34%, list=15%, signal=39%" |                                  |   |                |
| GSE20366_CD103_POS_VS_CD103_KLRG1_DP_TREG_UP                         |                |                                  |                                  |   |                |
| GSE20366_CD103_POS_VS_CD103_KLRG1_DP_TREG_UP                         | 148            | -0.4642418                       | -1.9102267                       | 0 | 9.12E-05 0.012 |
|                                                                      | 2044           | "tags=34%, list=14%, signal=39%" |                                  |   |                |
| GSE14308_INDUCED_VS_NATURAL_TREG_DN                                  |                |                                  |                                  |   |                |
| GSE14308_INDUCED_VS_NATURAL_TREG_DN                                  | 137            | -0.46615615                      | -1.9100958                       | 0 | 9.05E-05 0.012 |
|                                                                      | 1999           | "tags=30%, list=14%, signal=35%" |                                  |   |                |
| GSE9988_LPS_VS_CTRL_TREATED_MONOCYTE_UP                              |                |                                  |                                  |   |                |
| GSE9988_LPS_VS_CTRL_TREATED_MONOCYTE_UP                              | 132            | -0.47195947                      | -1.9050567                       | 0 | 8.98E-05 0.012 |
|                                                                      | 2610           | "tags=39%, list=18%, signal=47%" |                                  |   |                |
| GSE3565_CTRL_VS_LPS_INJECTED_DUSP1_KO_SPLENOCYTES_DN                 |                |                                  |                                  |   |                |
| GSE3565_CTRL_VS_LPS_INJECTED_DUSP1_KO_SPLENOCYTES_DN                 | 140            | -0.46406335                      | -1.9034745                       | 0 | 8.91E-05 0.012 |
|                                                                      | 1703           | "tags=36%, list=12%, signal=40%" |                                  |   |                |
| GSE17580_UNINFECTED_VS_S_MANSONI_INF_TREG_UP                         |                |                                  |                                  |   |                |
| GSE17580_UNINFECTED_VS_S_MANSONI_INF_TREG_UP                         | 147            | -0.46115103                      | -1.9019974                       | 0 | 9.47E-05 0.013 |

1883 "tags=31%, list=13%, signal=35%"  
GSE5679\_CTRL\_VS\_PPARG\_LIGAND\_ROSIGLITAZONE\_TREATED\_DC\_DN  
GSE5679\_CTRL\_VS\_PPARG\_LIGAND\_ROSIGLITAZONE\_TREATED\_DC\_DN  
141 -0.46007806 -1.8971163 0 1.07E-04 0.015  
2307 "tags=38%, list=16%, signal=45%"  
GSE2706\_UNSTIM\_VS\_2H\_LPS\_AND\_R848\_DC\_DN  
GSE2706\_UNSTIM\_VS\_2H\_LPS\_AND\_R848\_DC\_DN  
135 -0.46122292 -1.8947419 0 1.06E-04 0.015  
2508 "tags=37%, list=18%, signal=45%"  
GSE7852\_LN\_VS\_THYMUS\_TREG\_UP GSE7852\_LN\_VS\_THYMUS\_TREG\_UP  
0.015 136 -0.46660927 -1.8940452 0 1.05E-04  
1724 "tags=32%, list=12%, signal=36%"  
GSE36891\_UNSTIM\_VS\_POLYIC\_TLR3\_STIM\_PERITONEAL\_MACROPHAGE\_UP  
GSE36891\_UNSTIM\_VS\_POLYIC\_TLR3\_STIM\_PERITONEAL\_MACROPHAGE\_UP  
0.018 124 -0.46061397 -1.8906249 0 1.23E-04  
1961 "tags=27%, list=14%, signal=31%"  
GSE29618\_BCELL\_VS\_PDC\_UP GSE29618\_BCELL\_VS\_PDC\_UP  
135 -0.4663299 -1.8899939 0 1.22E-04 0.018  
1749 "tags=33%, list=12%, signal=38%"  
GSE40685\_NAIVE\_CD4\_TCELL\_VS\_TREG\_DN  
GSE40685\_NAIVE\_CD4\_TCELL\_VS\_TREG\_DN  
139 -0.46134606 -1.889884 0 1.21E-04 0.018  
1766 "tags=32%, list=13%, signal=36%"  
GSE7219\_UNSTIM\_VS\_LPS\_AND\_ANTI\_CD40\_STIM\_DC\_DN  
GSE7219\_UNSTIM\_VS\_LPS\_AND\_ANTI\_CD40\_STIM\_DC\_DN  
143 -0.45175028 -1.8890176 0 1.20E-04 0.018  
1498 "tags=30%, list=11%, signal=33%"  
GSE37605\_FOXP3\_FUSION\_GFP\_VS\_IRES\_GFP\_TREG\_C57BL6\_UP  
GSE37605\_FOXP3\_FUSION\_GFP\_VS\_IRES\_GFP\_TREG\_C57BL6\_UP  
162 -0.44733638 -1.8881068 0 1.19E-04 0.018  
1591 "tags=26%, list=11%, signal=29%"  
GSE17721\_CTRL\_VS\_CPG\_1H\_BMDC\_DN GSE17721\_CTRL\_VS\_CPG\_1H\_BMDC\_DN  
0.018 157 -0.44976962 -1.8853647 0 1.18E-04  
2188 "tags=25%, list=16%, signal=29%"  
GSE17974\_1H\_VS\_72H\_UNTREATED\_IN\_VITRO\_CD4\_TCELL\_UP  
GSE17974\_1H\_VS\_72H\_UNTREATED\_IN\_VITRO\_CD4\_TCELL\_UP  
126 -0.4623502 -1.8845193 0 1.17E-04 0.018  
1979 "tags=33%, list=14%, signal=38%"  
GSE20366\_EX\_VIVO\_VS\_HOMEOSTATIC\_CONVERSION\_NAIVE\_CD4\_TCELL\_UP  
GSE20366\_EX\_VIVO\_VS\_HOMEOSTATIC\_CONVERSION\_NAIVE\_CD4\_TCELL\_UP  
0.018 127 -0.46469375 -1.8837684 0 1.17E-04  
1848 "tags=35%, list=13%, signal=40%"  
GSE25123\_WT\_VS\_PPARG\_KO\_MACROPHAGE\_IL4\_STIM\_UP  
GSE25123\_WT\_VS\_PPARG\_KO\_MACROPHAGE\_IL4\_STIM\_UP  
139 -0.4575653 -1.8821361 0 1.22E-04 0.019  
2267 "tags=35%, list=16%, signal=41%"  
GSE40274\_FOXP3\_VS\_FOXP3\_AND\_EOS\_TRANSDUCED\_ACTIVATED\_CD4\_TCELL\_UP  
GSE40274\_FOXP3\_VS\_FOXP3\_AND\_EOS\_TRANSDUCED\_ACTIVATED\_CD4\_TCELL\_UP  
0.019 135 -0.4567287 -1.8816426 0 1.21E-04  
1726 "tags=33%, list=12%, signal=37%"  
GSE26343\_UNSTIM\_VS\_LPS\_STIM\_NFAT5\_KO\_MACROPHAGE\_DN  
GSE26343\_UNSTIM\_VS\_LPS\_STIM\_NFAT5\_KO\_MACROPHAGE\_DN  
167 -0.44697267 -1.8793068 0 1.26E-04 0.02  
2610 "tags=37%, list=18%, signal=44%"

GSE32986\_CURDLAN\_HIGHDOSE\_VS\_GMCSF\_AND\_CURDLAN\_HIGHDOSE\_STIM\_DC\_DN  
GSE32986\_CURDLAN\_HIGHDOSE\_VS\_GMCSF\_AND\_CURDLAN\_HIGHDOSE\_STIM\_DC\_DN  
155 -0.45083338 -1.8775165 0 1.31E-04  
0.021 2610 "tags=39%, list=18%, signal=48%"  
GSE2770\_UNTREATED\_VS\_ACT\_CD4\_TCELL\_48H\_DN  
GSE2770\_UNTREATED\_VS\_ACT\_CD4\_TCELL\_48H\_DN  
102 -0.47754577 -1.875178 0 1.47E-04 0.024  
1823 "tags=31%, list=13%, signal=36%"  
GSE40277\_EOS\_AND\_LEF1\_TRANSDUCED\_VS\_GATA1\_AND\_SATB1\_TRANSDUCED\_CD4\_T  
CELL\_UP  
GSE40277\_EOS\_AND\_LEF1\_TRANSDUCED\_VS\_GATA1\_AND\_SATB1\_TRANSDUCED\_CD4\_T  
CELL\_UP  
152 -0.45159155 -1.8748463 0  
1.51E-04 0.025 1853 "tags=33%, list=13%, signal=37%"  
GSE20366\_EX\_VIVO\_VS\_DEC205\_CONVERSION\_NAIVE\_CD4\_TCELL\_DN  
GSE20366\_EX\_VIVO\_VS\_DEC205\_CONVERSION\_NAIVE\_CD4\_TCELL\_DN  
147 -0.44703776 -1.8647822 0 1.83E-04 0.031  
3051 "tags=39%, list=22%, signal=50%"  
GSE22886\_NAIVE\_BCELL\_VS\_BLOOD\_PLASMA\_CELL\_UP  
GSE22886\_NAIVE\_BCELL\_VS\_BLOOD\_PLASMA\_CELL\_UP  
130 -0.458609 -1.8641526 0 1.82E-04 0.031  
2972 "tags=38%, list=21%, signal=47%"  
GSE33424\_CD161\_HIGH\_VS\_NEG\_CD8\_TCELL\_UP  
GSE33424\_CD161\_HIGH\_VS\_NEG\_CD8\_TCELL\_UP  
156 -0.44705403 -1.8633822 0 1.81E-04 0.031  
2288 "tags=35%, list=16%, signal=41%"  
GSE41176\_WT\_VS\_TAK1\_KO\_ANTI\_IGM\_STIM\_BCELL\_6H\_UP  
GSE41176\_WT\_VS\_TAK1\_KO\_ANTI\_IGM\_STIM\_BCELL\_6H\_UP  
150 -0.44440928 -1.8622257 0 1.80E-04 0.031  
2032 "tags=28%, list=14%, signal=32%"  
GSE41867\_DAY8\_VS\_DAY15\_LCMV\_CLONE13\_EFFECTOR\_CD8\_TCELL\_UP  
GSE41867\_DAY8\_VS\_DAY15\_LCMV\_CLONE13\_EFFECTOR\_CD8\_TCELL\_UP  
145 -0.4533047 -1.8606536 0 1.84E-04 0.032  
1452 "tags=26%, list=10%, signal=29%"  
GSE21360\_SECONDARY\_VS\_QUATERNARY\_MEMORY\_CD8\_TCELL\_UP  
GSE21360\_SECONDARY\_VS\_QUATERNARY\_MEMORY\_CD8\_TCELL\_UP  
151 -0.44985697 -1.8601979 0 1.83E-04 0.032  
1254 "tags=24%, list=9%, signal=26%"  
GSE36078\_UNTREATED\_VS\_AD5\_T425A\_HEXON\_INF\_IL1R\_KO\_MOUSE\_LUNG\_DC\_DN  
GSE36078\_UNTREATED\_VS\_AD5\_T425A\_HEXON\_INF\_IL1R\_KO\_MOUSE\_LUNG\_DC\_DN  
132 -0.4601158 -1.8588428 0 1.82E-04  
0.032 2618 "tags=30%, list=19%, signal=36%"  
GSE37301\_CD4\_TCELL\_VS GRANULOCYTE\_MONOCYTE\_PROGENITOR\_UP  
GSE37301\_CD4\_TCELL\_VS GRANULOCYTE\_MONOCYTE\_PROGENITOR\_UP  
134 -0.45664847 -1.8565542 0 1.97E-04 0.035  
1665 "tags=27%, list=12%, signal=30%"  
GSE4590\_PRE\_BCELL\_VS\_LARGE\_PRE\_BCELL\_UP  
GSE4590\_PRE\_BCELL\_VS\_LARGE\_PRE\_BCELL\_UP  
121 -0.46261832 -1.8487403 0 2.27E-04 0.041  
2180 "tags=31%, list=15%, signal=36%"  
GSE32255\_WT\_VS\_JMJD2D\_KNOCKDOWN\_4H\_LPS\_STIM\_DC\_UP  
GSE32255\_WT\_VS\_JMJD2D\_KNOCKDOWN\_4H\_LPS\_STIM\_DC\_UP  
108 -0.46539435 -1.8447201 0 2.42E-04 0.044  
1329 "tags=26%, list=9%, signal=28%"  
GSE14415\_FOXP3\_KO\_NATURAL\_TREG\_VS\_TCONV\_DN

GSE14415\_FOXP3\_KO\_NATURAL\_TREG\_VS\_TCONV\_DN  
142 -0.45255578 -1.8433526 0 2.40E-04 0.044  
1397 "tags=29%, list=10%, signal=32%"  
GSE28408\_LY6G\_POS\_VS\_NEG\_DC\_UP GSE28408\_LY6G\_POS\_VS\_NEG\_DC\_UP  
139 -0.44717345 -1.8406501 0 2.54E-04  
0.047 2526 "tags=32%, list=18%, signal=39%"  
GSE21670\_IL6\_VS\_TGFB\_AND\_IL6\_TREATED\_STAT3\_KO\_CD4\_TCELL\_DN  
GSE21670\_IL6\_VS\_TGFB\_AND\_IL6\_TREATED\_STAT3\_KO\_CD4\_TCELL\_DN  
141 -0.44594896 -1.8290899 0 3.25E-04 0.061  
2238 "tags=33%, list=16%, signal=38%"  
GSE41867\_NAIVE\_VS\_DAY15\_LCMV\_EFFECTOR\_CD8\_TCELL\_DN  
GSE41867\_NAIVE\_VS\_DAY15\_LCMV\_EFFECTOR\_CD8\_TCELL\_DN  
143 -0.44458497 -1.828187 0 3.28E-04 0.062  
1367 "tags=26%, list=10%, signal=28%"  
GSE8921\_UNSTIM\_VS\_TLR1\_2\_STIM\_MONOCYTE\_6H\_UP  
GSE8921\_UNSTIM\_VS\_TLR1\_2\_STIM\_MONOCYTE\_6H\_UP  
138 -0.4408534 -1.8234066 0 3.67E-04 0.07  
3126 "tags=43%, list=22%, signal=54%"  
GSE17974\_0H\_VS\_6H\_IN\_VITRO\_ACT\_CD4\_TCELL\_UP  
GSE17974\_0H\_VS\_6H\_IN\_VITRO\_ACT\_CD4\_TCELL\_UP  
125 -0.44687608 -1.8222996 0 3.70E-04 0.071  
1461 "tags=25%, list=10%, signal=27%"  
GSE9988\_LPS\_VS\_VEHICLE\_TREATED\_MONOCYTE\_UP  
GSE9988\_LPS\_VS\_VEHICLE\_TREATED\_MONOCYTE\_UP  
129 -0.44554713 -1.820809 0 3.78E-04 0.073  
2159 "tags=32%, list=15%, signal=37%"  
GSE19825\_NAIVE\_VS\_IL2RAHIGH\_DAY3\_EFF\_CD8\_TCELL\_UP  
GSE19825\_NAIVE\_VS\_IL2RAHIGH\_DAY3\_EFF\_CD8\_TCELL\_UP  
133 -0.4467233 -1.8161142 0 3.96E-04 0.076  
4635 "tags=46%, list=33%, signal=68%"  
GSE3565\_DUSP1\_VS\_WT\_SPLENOCYTES\_POST\_LPS\_INJECTION\_UP  
GSE3565\_DUSP1\_VS\_WT\_SPLENOCYTES\_POST\_LPS\_INJECTION\_UP  
120 -0.4536339 -1.8159174 0 3.98E-04 0.077  
1371 "tags=28%, list=10%, signal=31%"  
GSE23505\_UNTREATED\_VS\_4DAY\_IL6\_IL1\_TGFB\_TREATED\_CD4\_TCELL\_DN  
GSE23505\_UNTREATED\_VS\_4DAY\_IL6\_IL1\_TGFB\_TREATED\_CD4\_TCELL\_DN  
139 -0.44955176 -1.8129193 0 4.16E-04  
0.081 1555 "tags=26%, list=11%, signal=29%"  
GSE7219\_UNSTIM\_VS\_LPS\_AND\_ANTI\_CD40\_STIM\_NIK\_NFKB2\_KO\_DC\_DN  
GSE7219\_UNSTIM\_VS\_LPS\_AND\_ANTI\_CD40\_STIM\_NIK\_NFKB2\_KO\_DC\_DN  
163 -0.4294952 -1.8105186 0 4.18E-04 0.082  
1397 "tags=31%, list=10%, signal=34%"  
GSE46606\_UNSTIM\_VS\_CD40L\_IL2\_IL5\_1DAY\_STIMULATED\_IRF4HIGH\_SORTED\_BCE  
LL\_DN  
GSE46606\_UNSTIM\_VS\_CD40L\_IL2\_IL5\_1DAY\_STIMULATED\_IRF4HIGH\_SORTED\_BCE  
LL\_DN 153 -0.44271144 -1.8101344 0  
4.30E-04 0.085 1776 "tags=29%, list=13%, signal=33%"  
GSE24142\_EARLY\_THYMIC\_PROGENITOR\_VS\_DN2\_THYMOCYTE\_ADULT\_UP  
GSE24142\_EARLY\_THYMIC\_PROGENITOR\_VS\_DN2\_THYMOCYTE\_ADULT\_UP  
156 -0.43368486 -1.8056655 0 4.72E-04 0.094  
1166 "tags=22%, list=8%, signal=23%"  
GSE21546\_WT\_VS\_SAP1A\_KO\_AND\_ELK1\_KO\_ANTI\_CD3\_STIM\_DP\_THYMOCYTES\_UP  
GSE21546\_WT\_VS\_SAP1A\_KO\_AND\_ELK1\_KO\_ANTI\_CD3\_STIM\_DP\_THYMOCYTES\_UP  
136 -0.4424958 -1.8044275 0 4.79E-04

0.096 2646 "tags=35%, list=19%, signal=43%"  
 GSE23925\_DARK\_ZONE\_VS\_NAIVE\_BCELL\_DN  
 GSE23925\_DARK\_ZONE\_VS\_NAIVE\_BCELL\_DN  
 149 -0.4325648 -1.80409 0 4.81E-04 0.097  
 1844 "tags=29%, list=13%, signal=33%"  
 GSE17812\_WT\_VS\_THPOK\_KO\_MEMORY\_CD8\_TCELL\_UP  
 GSE17812\_WT\_VS\_THPOK\_KO\_MEMORY\_CD8\_TCELL\_UP  
 155 -0.4351937 -1.8023919 0 4.88E-04 0.099  
 1462 "tags=28%, list=10%, signal=31%"  
 GSE21546\_UNSTIM\_VS\_ANTI\_CD3\_STIM\_SAP1A\_KO\_DP\_THYMOCYTES\_UP  
 GSE21546\_UNSTIM\_VS\_ANTI\_CD3\_STIM\_SAP1A\_KO\_DP\_THYMOCYTES\_UP  
 144 -0.43539137 -1.7997974 0 5.28E-04 0.108  
 2619 "tags=33%, list=19%, signal=41%"  
 GSE3039\_B2\_VS\_B1\_BCELL\_UP GSE3039\_B2\_VS\_B1\_BCELL\_UP  
 141 -0.4346198 -1.7988439 0 5.53E-04 0.114  
 2215 "tags=35%, list=16%, signal=42%"  
 GSE7852\_TREG\_VS\_TCONV\_UP GSE7852\_TREG\_VS\_TCONV\_UP  
 159 -0.43105733 -1.7986937 0 5.55E-04 0.115  
 2636 "tags=38%, list=19%, signal=46%"  
 GSE2770\_TGFB\_AND\_IL4\_VS\_IL12\_TREATED\_ACT\_CD4\_TCELL\_2H\_DN  
 GSE2770\_TGFB\_AND\_IL4\_VS\_IL12\_TREATED\_ACT\_CD4\_TCELL\_2H\_DN  
 137 -0.4415902 -1.7984253 0 5.57E-04 0.116  
 2159 "tags=32%, list=15%, signal=38%"  
 GSE17974\_0H\_VS\_72H\_IN\_VITRO\_ACT\_CD4\_TCELL\_UP  
 GSE17974\_0H\_VS\_72H\_IN\_VITRO\_ACT\_CD4\_TCELL\_UP  
 107 -0.45646754 -1.7982774 0 5.54E-04 0.116  
 2064 "tags=31%, list=15%, signal=36%"  
 GSE2770\_IL12\_AND\_TGFB\_VS\_IL4\_TREATED\_ACT\_CD4\_TCELL\_48H\_UP  
 GSE2770\_IL12\_AND\_TGFB\_VS\_IL4\_TREATED\_ACT\_CD4\_TCELL\_48H\_UP  
 137 -0.43821752 -1.7979449 0.001904762 5.51E-04  
 0.116 1531 "tags=31%, list=11%, signal=35%"  
 GSE7348\_UNSTIM\_VS\_LPS\_STIM\_MACROPHAGE\_UP  
 GSE7348\_UNSTIM\_VS\_LPS\_STIM\_MACROPHAGE\_UP  
 117 -0.4473757 -1.7977605 0 5.48E-04 0.116  
 2162 "tags=34%, list=15%, signal=40%"  
 GSE12003\_MIR223\_KO\_VS\_WT\_BM\_PROGENITOR\_4D\_CULTURE\_UP  
 GSE12003\_MIR223\_KO\_VS\_WT\_BM\_PROGENITOR\_4D\_CULTURE\_UP  
 146 -0.43254387 -1.797382 0 5.45E-04 0.116  
 1712 "tags=30%, list=12%, signal=34%"  
 GSE3920\_IFNA\_VS\_IFNB\_TREATED\_ENDOTHELIAL\_CELL\_UP  
 GSE3920\_IFNA\_VS\_IFNB\_TREATED\_ENDOTHELIAL\_CELL\_UP  
 136 -0.44366974 -1.7970116 0 5.46E-04 0.117  
 2704 "tags=40%, list=19%, signal=49%"  
 GSE32986\_GMCSF\_VS\_GMCSF\_AND\_CURDLAN\_LOWDOSE\_STIM\_DC\_DN  
 GSE32986\_GMCSF\_VS\_GMCSF\_AND\_CURDLAN\_LOWDOSE\_STIM\_DC\_DN  
 106 -0.45065296 -1.7956415 0 5.43E-04 0.117  
 1470 "tags=25%, list=10%, signal=28%"  
 GSE7768\_OVA\_ALONE\_VS\_OVA\_WITH\_LPS\_IMMUNIZED\_MOUSE\_WHOLE\_SPLEEN\_6H\_DN  
  
 GSE7768\_OVA\_ALONE\_VS\_OVA\_WITH\_LPS\_IMMUNIZED\_MOUSE\_WHOLE\_SPLEEN\_6H\_DN  
 142 -0.4348279 -1.7915626 0  
 5.95E-04 0.128 4028 "tags=48%, list=29%, signal=66%"  
 GSE3039\_NKT\_CELL\_VS\_B2\_BCELL\_DN GSE3039\_NKT\_CELL\_VS\_B2\_BCELL\_DN  
 154 -0.42342633 -1.7893492 0 6.09E-04

0.132 2234 "tags=34%, list=16%, signal=40%"  
GSE411\_UNSTIM\_VS\_400MIN\_IL6\_STIM\_SOCS3\_KO\_MACROPHAGE\_UP  
GSE411\_UNSTIM\_VS\_400MIN\_IL6\_STIM\_SOCS3\_KO\_MACROPHAGE\_UP  
134 -0.43904307 -1.7893274 0 6.06E-04 0.132  
2129 "tags=35%, list=15%, signal=41%"  
GSE30083\_SP1\_VS\_SP2\_THYMOCYTE\_DN GSE30083\_SP1\_VS\_SP2\_THYMOCYTE\_DN  
139 -0.43508726 -1.7891263 0 6.07E-04  
0.132 1141 "tags=18%, list=8%, signal=19%"  
GSE19825\_NAIVE\_VS\_DAY3\_EFF\_CD8\_TCELL\_UP  
GSE19825\_NAIVE\_VS\_DAY3\_EFF\_CD8\_TCELL\_UP  
144 -0.43258572 -1.7890601 0 6.04E-04 0.132  
5310 "tags=49%, list=38%, signal=78%"  
GSE30971\_CTRL\_VS\_LPS\_STIM\_MACROPHAGE\_WBP7\_HET\_2H\_UP  
GSE30971\_CTRL\_VS\_LPS\_STIM\_MACROPHAGE\_WBP7\_HET\_2H\_UP  
144 -0.43443522 -1.7879193 0 6.10E-04 0.134  
2159 "tags=31%, list=15%, signal=37%"  
GSE17301\_IFNA2\_VS\_IFNA5\_STIM\_ACD3\_ACD28\_ACT\_CD8\_TCELL\_UP  
GSE17301\_IFNA2\_VS\_IFNA5\_STIM\_ACD3\_ACD28\_ACT\_CD8\_TCELL\_UP  
144 -0.43823898 -1.7876006 0 6.11E-04 0.135  
1148 "tags=25%, list=8%, signal=27%"  
GSE45365\_CD8A\_DC\_VS\_CD11B\_DC\_IFNAR\_KO\_MCMV\_INFECTION\_DN  
GSE45365\_CD8A\_DC\_VS\_CD11B\_DC\_IFNAR\_KO\_MCMV\_INFECTION\_DN  
108 -0.45199355 -1.7863525 0 6.30E-04 0.14  
2964 "tags=37%, list=21%, signal=47%"  
GSE13522\_CTRL\_VS\_T\_CRUZI\_Y\_STRAIN\_INF\_SKIN\_IFNAR\_KO\_UP  
GSE13522\_CTRL\_VS\_T\_CRUZI\_Y\_STRAIN\_INF\_SKIN\_IFNAR\_KO\_UP  
152 -0.42371684 -1.7854992 0 6.44E-04 0.143  
1315 "tags=27%, list=9%, signal=29%"  
GSE36476\_CTRL\_VS\_TSST\_ACT\_72H\_MEMORY\_CD4\_TCELL\_OLD\_UP  
GSE36476\_CTRL\_VS\_TSST\_ACT\_72H\_MEMORY\_CD4\_TCELL\_OLD\_UP  
132 -0.43953934 -1.7844619 0 6.49E-04 0.144  
1713 "tags=27%, list=12%, signal=31%"  
GSE27786\_CD8\_TCELL\_VS\_NKCELL\_UP GSE27786\_CD8\_TCELL\_VS\_NKCELL\_UP  
142 -0.43031996 -1.7834033 0 6.50E-04  
0.145 2306 "tags=27%, list=16%, signal=32%"  
GSE4984\_UNTREATED\_VS\_LPS\_TREATED\_DC\_UP  
GSE4984\_UNTREATED\_VS\_LPS\_TREATED\_DC\_UP  
110 -0.4554997 -1.7815875 0 6.77E-04 0.152  
3058 "tags=33%, list=22%, signal=41%"  
GSE21670\_STAT3\_KO\_VS\_WT\_CD4\_TCELL\_IL6\_TREATED\_DN  
GSE21670\_STAT3\_KO\_VS\_WT\_CD4\_TCELL\_IL6\_TREATED\_DN  
158 -0.43046772 -1.7807931 0 6.77E-04 0.152  
2095 "tags=29%, list=15%, signal=34%"  
GSE28237\_FOLLICULAR\_VS\_LATE\_GC\_BCELL\_UP  
GSE28237\_FOLLICULAR\_VS\_LATE\_GC\_BCELL\_UP  
141 -0.43258014 -1.779987 0.001886793 6.83E-04  
0.153 3231 "tags=32%, list=23%, signal=41%"  
GSE3982\_MEMORY\_CD4\_TCELL\_VS\_TH1\_UP  
GSE3982\_MEMORY\_CD4\_TCELL\_VS\_TH1\_UP  
114 -0.4465574 -1.7791722 0 6.92E-04 0.156  
1625 "tags=28%, list=12%, signal=31%"  
GSE40274\_CTRL\_VS\_FOXP3\_TRANSDUCED\_ACTIVATED\_CD4\_TCELL\_DN  
GSE40274\_CTRL\_VS\_FOXP3\_TRANSDUCED\_ACTIVATED\_CD4\_TCELL\_DN  
138 -0.43532634 -1.7776823 0 7.05E-04 0.16

1715 "tags=33%, list=12%, signal=37%"  
GSE20366\_TREG\_VS\_NAIVE\_CD4\_TCELL\_DN  
GSE20366\_TREG\_VS\_NAIVE\_CD4\_TCELL\_DN  
153 -0.42875808 -1.7776456 0 7.01E-04 0.16  
2170 "tags=32%, list=15%, signal=37%"  
GSE7460\_CTRL\_VS\_TGFB\_TREATED\_ACT\_FOXP3\_HET\_TCONV\_DN  
GSE7460\_CTRL\_VS\_TGFB\_TREATED\_ACT\_FOXP3\_HET\_TCONV\_DN  
144 -0.4300766 -1.7771516 0 7.06E-04 0.162  
790 "tags=19%, list=6%, signal=20%"  
GSE24492\_LYVE\_NEG\_VS\_POS\_MACROPHAGE\_UP  
GSE24492\_LYVE\_NEG\_VS\_POS\_MACROPHAGE\_UP  
129 -0.4347614 -1.7764466 0 7.15E-04 0.163  
1431 "tags=24%, list=10%, signal=26%"  
GSE7852\_TREG\_VS\_TCONV\_THYMUS\_UP GSE7852\_TREG\_VS\_TCONV\_THYMUS\_UP  
157 -0.42323825 -1.7741575 0 7.32E-04  
0.168 1208 "tags=27%, list=9%, signal=30%"  
GSE7460\_CTRL\_VS\_TGFB\_TREATED\_ACT\_TREG\_DN  
GSE7460\_CTRL\_VS\_TGFB\_TREATED\_ACT\_TREG\_DN  
140 -0.43314743 -1.7740017 0 7.28E-04 0.168  
1500 "tags=22%, list=11%, signal=25%"  
GSE3920\_UNTREATED\_VS\_IFNG\_TREATED\_ENDOTHELIAL\_CELL\_UP  
GSE3920\_UNTREATED\_VS\_IFNG\_TREATED\_ENDOTHELIAL\_CELL\_UP  
121 -0.44257233 -1.7726724 0 7.37E-04 0.17  
2249 "tags=30%, list=16%, signal=35%"  
GSE2706\_UNSTIM\_VS\_2H\_LPS\_DC\_DN GSE2706\_UNSTIM\_VS\_2H\_LPS\_DC\_DN  
133 -0.43729165 -1.7708048 0 7.41E-04  
0.171 2610 "tags=37%, list=18%, signal=45%"  
GSE30083\_SP2\_VS\_SP3\_THYMOCYTE\_UP GSE30083\_SP2\_VS\_SP3\_THYMOCYTE\_UP  
151 -0.4257126 -1.763643 0 8.14E-04  
0.186 2254 "tags=25%, list=16%, signal=29%"  
GSE7509\_UNSTIM\_VS\_FCGRIIB\_STIM\_MONOCYTE\_DN  
GSE7509\_UNSTIM\_VS\_FCGRIIB\_STIM\_MONOCYTE\_DN  
119 -0.4364312 -1.7591431 0 8.94E-04 0.2  
3397 "tags=45%, list=24%, signal=58%"  
GSE41176\_UNSTIM\_VS\_ANTI\_IGM\_STIM\_BCELL\_1H\_UP  
GSE41176\_UNSTIM\_VS\_ANTI\_IGM\_STIM\_BCELL\_1H\_UP  
154 -0.4240426 -1.7585852 0 8.94E-04 0.201  
1704 "tags=26%, list=12%, signal=29%"  
GSE21927\_SPLENIC\_VS\_TUMOR\_MONOCYTES\_FROM\_C26GM\_TUMOROUS\_MICE\_BALBC\_D  
N  
GSE21927\_SPLENIC\_VS\_TUMOR\_MONOCYTES\_FROM\_C26GM\_TUMOROUS\_MICE\_BALBC\_D  
N  
138 -0.431465 -1.7583712 0  
8.90E-04 0.201 1784 "tags=28%, list=13%, signal=31%"  
GSE9988\_LOW\_LPS\_VS\_CTRL\_TREATED\_MONOCYTE\_UP  
GSE9988\_LOW\_LPS\_VS\_CTRL\_TREATED\_MONOCYTE\_UP  
139 -0.4373939 -1.7575064 0 9.09E-04 0.207  
2159 "tags=32%, list=15%, signal=38%"  
GSE36476\_YOUNG\_VS\_OLD\_DONOR\_MEMORY\_CD4\_TCELL\_72H\_TSST\_ACT\_DN  
GSE36476\_YOUNG\_VS\_OLD\_DONOR\_MEMORY\_CD4\_TCELL\_72H\_TSST\_ACT\_DN  
130 -0.43232122 -1.7574618 0.001960784  
9.09E-04 0.208 2536 "tags=33%, list=18%, signal=40%"  
GSE24142\_ADULT\_VS\_FETAL\_DN2\_THYMOCYTE\_UP  
GSE24142\_ADULT\_VS\_FETAL\_DN2\_THYMOCYTE\_UP  
163 -0.42160857 -1.7552264 0 9.51E-04 0.215

1414 "tags=28%, list=10%, signal=30%"  
GSE45365\_NK\_CELL\_VS\_CD8A\_DC\_MCMV\_INFECTION\_UP  
GSE45365\_NK\_CELL\_VS\_CD8A\_DC\_MCMV\_INFECTION\_UP  
115 -0.43761927 -1.753521 0 9.82E-04 0.222  
3222 "tags=37%, list=23%, signal=48%"  
GSE3039\_NKT\_CELL\_VS\_ALPHABETA\_CD8\_TCELL\_DN  
GSE3039\_NKT\_CELL\_VS\_ALPHABETA\_CD8\_TCELL\_DN  
139 -0.43185902 -1.7534653 0 9.81E-04 0.223  
2304 "tags=35%, list=16%, signal=41%"  
GSE27241\_WT\_VS\_RORGT\_KO\_TH17\_POLARIZED\_CD4\_TCELL\_TREATED\_WITH\_DIGOXI  
N\_DN  
GSE27241\_WT\_VS\_RORGT\_KO\_TH17\_POLARIZED\_CD4\_TCELL\_TREATED\_WITH\_DIGOXI  
N\_DN 148 -0.42632693 -1.7508172 0  
0.001011349 0.231 1695 "tags=31%, list=12%, signal=35%"  
GSE7348\_UNSTIM\_VS\_LPS\_STIM\_MACROPHAGE\_DN  
GSE7348\_UNSTIM\_VS\_LPS\_STIM\_MACROPHAGE\_DN  
144 -0.42650792 -1.7501694 0 0.001018158  
0.233 2215 "tags=31%, list=16%, signal=37%"  
GSE30083\_SP3\_VS\_SP4\_THYMOCYTE\_DN GSE30083\_SP3\_VS\_SP4\_THYMOCYTE\_DN  
146 -0.4204882 -1.7498161 0  
0.00101739 0.234 1621 "tags=30%, list=11%, signal=34%"  
GSE30962\_PRIMARY\_VS\_SECONDARY\_ACUTE\_LCMV\_INF\_CD8\_TCELL\_DN  
GSE30962\_PRIMARY\_VS\_SECONDARY\_ACUTE\_LCMV\_INF\_CD8\_TCELL\_DN  
147 -0.41950104 -1.7494553 0 0.001012807  
0.234 1184 "tags=22%, list=8%, signal=24%"  
GSE7852\_THYMUS\_VS\_FAT\_TCONV\_DN GSE7852\_THYMUS\_VS\_FAT\_TCONV\_DN  
148 -0.42083126 -1.7474222 0  
0.001045847 0.241 1830 "tags=31%, list=13%, signal=35%"  
GSE23984\_CTRL\_VS\_HYPOCALEMIC\_VITAMIND\_ANALOG\_TCELL\_DN  
GSE23984\_CTRL\_VS\_HYPOCALEMIC\_VITAMIND\_ANALOG\_TCELL\_DN  
150 -0.42222592 -1.7452188 0 0.001101285  
0.25 2187 "tags=31%, list=15%, signal=37%"  
GSE42021\_TCONV\_PLN\_VS\_TREG\_PRECURSORS\_THYMUS\_DN  
GSE42021\_TCONV\_PLN\_VS\_TREG\_PRECURSORS\_THYMUS\_DN  
165 -0.4120094 -1.7450843 0 0.001096391  
0.25 2215 "tags=30%, list=16%, signal=35%"  
GSE15930\_NAIVE\_VS\_48H\_IN\_VITRO\_STIM\_IFNAB\_CD8\_TCELL\_UP  
GSE15930\_NAIVE\_VS\_48H\_IN\_VITRO\_STIM\_IFNAB\_CD8\_TCELL\_UP  
152 -0.4187882 -1.7449926 0 0.00109525  
0.251 3035 "tags=38%, list=22%, signal=47%"  
GSE33425\_CD8\_ALPHAALPHA\_VS\_ALPHABETA\_CD161\_HIGH\_TCELL\_UP  
GSE33425\_CD8\_ALPHAALPHA\_VS\_ALPHABETA\_CD161\_HIGH\_TCELL\_UP  
160 -0.41971055 -1.7449284 0 0.00109787  
0.251 2842 "tags=38%, list=20%, signal=46%"  
GSE6092\_CTRL\_VS\_BORRELIA\_BIRGD OFERI\_INF\_ENDOTHELIAL\_CELL\_DN  
GSE6092\_CTRL\_VS\_BORRELIA\_BIRGD OFERI\_INF\_ENDOTHELIAL\_CELL\_DN  
118 -0.43859532 -1.7446386 0 0.001096782  
0.251 3811 "tags=46%, list=27%, signal=62%"  
GSE3982\_EFF\_MEMORY\_VS\_CENT\_MEMORY\_CD4\_TCELL\_DN  
GSE3982\_EFF\_MEMORY\_VS\_CENT\_MEMORY\_CD4\_TCELL\_DN  
130 -0.42939907 -1.7427028 0 0.001117696  
0.256 1990 "tags=26%, list=14%, signal=30%"  
GSE26495\_NAIVE\_VS\_PD1HIGH\_CD8\_TCELL\_UP  
GSE26495\_NAIVE\_VS\_PD1HIGH\_CD8\_TCELL\_UP



|             |                                                     |                                  |                                  |             |
|-------------|-----------------------------------------------------|----------------------------------|----------------------------------|-------------|
| 113         | -0.4412894                                          | -1.7381017                       | 0                                | 0.00119317  |
| 0.27        | 2156                                                | "tags=28%, list=15%, signal=33%" |                                  |             |
| GSE32986    | GMCSF_VS_GMCSF_AND_CURDLAN_HIGHDOSE_STIM_DC_DN      |                                  |                                  |             |
| GSE32986    | GMCSF_VS_GMCSF_AND_CURDLAN_HIGHDOSE_STIM_DC_DN      |                                  |                                  |             |
| 129         | -0.428331                                           | -1.7367469                       | 0                                | 0.001217012 |
| 0.274       | 1857                                                | "tags=26%, list=13%, signal=30%" |                                  |             |
| GSE7764     | IL15_TREATED_VS_CTRL_NK_CELL_24H_DN                 |                                  |                                  |             |
| GSE7764     | IL15_TREATED_VS_CTRL_NK_CELL_24H_DN                 |                                  |                                  |             |
| 147         | -0.41486752                                         | -1.7349398                       | 0                                | 0.001233721 |
| 0.278       | 2527                                                | "tags=37%, list=18%, signal=45%" |                                  |             |
| GSE41867    | NAIVE_VS_DAY15_LCMV_ARMSTRONG_EFFECTOR_CD8_TCELL_DN |                                  |                                  |             |
| GSE41867    | NAIVE_VS_DAY15_LCMV_ARMSTRONG_EFFECTOR_CD8_TCELL_DN |                                  |                                  |             |
| 144         | -0.4238393                                          | -1.7341692                       | 0                                |             |
| 0.001239448 | 0.279                                               | 2251                             | "tags=31%, list=16%, signal=36%" |             |
| GSE15659    | RESTING_TREG_VS_NONSUPPRESSIVE_TCELL_UP             |                                  |                                  |             |
| GSE15659    | RESTING_TREG_VS_NONSUPPRESSIVE_TCELL_UP             |                                  |                                  |             |
| 105         | -0.43776393                                         | -1.729139                        | 0                                | 0.00134586  |
| 0.306       | 2241                                                | "tags=28%, list=16%, signal=33%" |                                  |             |
| GSE7219     | WT_VS_NIK_NFKB2_KO_DC_UP                            | GSE7219_WT_VS_NIK_NFKB2_KO_DC_UP |                                  |             |
| 159         | -0.4179214                                          | -1.726142                        | 0                                |             |
| 0.001408239 | 0.32                                                | 1767                             | "tags=35%, list=13%, signal=40%" |             |
| GSE24142    | EARLY_THYMIC_PROGENITOR_VS_DN2_THYMOCYTE_FETAL_UP   |                                  |                                  |             |
| GSE24142    | EARLY_THYMIC_PROGENITOR_VS_DN2_THYMOCYTE_FETAL_UP   |                                  |                                  |             |
| 170         | -0.40678644                                         | -1.7241437                       | 0                                | 0.001441633 |
| 0.327       | 1209                                                | "tags=23%, list=9%, signal=25%"  |                                  |             |
| GSE3920     | UNTREATED_VS_IFNA_TREATED_FIBROBLAST_UP             |                                  |                                  |             |
| GSE3920     | UNTREATED_VS_IFNA_TREATED_FIBROBLAST_UP             |                                  |                                  |             |
| 139         | -0.41850185                                         | -1.7232732                       | 0                                | 0.001449754 |
| 0.329       | 3811                                                | "tags=46%, list=27%, signal=62%" |                                  |             |
| GSE14350    | TREG_VS_TEFF_IN_IL2RB_KO_UP                         |                                  |                                  |             |
| GSE14350    | TREG_VS_TEFF_IN_IL2RB_KO_UP                         |                                  |                                  |             |
| 138         | -0.41858697                                         | -1.7227509                       | 0                                | 0.001450695 |
| 0.331       | 2753                                                | "tags=36%, list=20%, signal=45%" |                                  |             |
| GSE17974    | CTRL_VS_ACT_IL4_AND_ANTI_IL12_4H_CD4_TCELL_UP       |                                  |                                  |             |
| GSE17974    | CTRL_VS_ACT_IL4_AND_ANTI_IL12_4H_CD4_TCELL_UP       |                                  |                                  |             |
| 122         | -0.42628375                                         | -1.7209926                       | 0                                | 0.001483399 |
| 0.339       | 1790                                                | "tags=28%, list=13%, signal=32%" |                                  |             |
| GSE37301    | MULTIPOTENT_PROGENITOR_VS_LYMPHOID_PRIMED_MPP_UP    |                                  |                                  |             |
| GSE37301    | MULTIPOTENT_PROGENITOR_VS_LYMPHOID_PRIMED_MPP_UP    |                                  |                                  |             |
| 115         | -0.42850593                                         | -1.718914                        | 0                                | 0.001547468 |
| 0.35        | 1780                                                | "tags=30%, list=13%, signal=34%" |                                  |             |
| GSE11961    | MEMORY_BCELL_DAY7_VS_GERMINAL_CENTER_BCELL_DAY7_DN  |                                  |                                  |             |
| GSE11961    | MEMORY_BCELL_DAY7_VS_GERMINAL_CENTER_BCELL_DAY7_DN  |                                  |                                  |             |
| 145         | -0.4165254                                          | -1.7178406                       | 0                                | 0.00155498  |
| 0.353       | 1725                                                | "tags=29%, list=12%, signal=33%" |                                  |             |
| GSE9988     | LOW_LPS_VS_VEHICLE_TREATED_MONOCYTE_UP              |                                  |                                  |             |
| GSE9988     | LOW_LPS_VS_VEHICLE_TREATED_MONOCYTE_UP              |                                  |                                  |             |
| 135         | -0.42258197                                         | -1.7163696                       | 0                                | 0.001580156 |
| 0.358       | 2159                                                | "tags=31%, list=15%, signal=36%" |                                  |             |
| GSE40273    | GATA1_KO_VS_WT_TREG_DN                              | GSE40273_GATA1_KO_VS_WT_TREG_DN  |                                  |             |
| 133         | -0.41719845                                         | -1.715808                        | 0                                |             |
| 0.001580624 | 0.359                                               | 1980                             | "tags=33%, list=14%, signal=38%" |             |
| GSE27434    | WT_VS_DNMT1_KO_TREG_DN                              | GSE27434_WT_VS_DNMT1_KO_TREG_DN  |                                  |             |
| 168         | -0.40659755                                         | -1.7140023                       | 0                                |             |

0.001646512 0.371 1864 "tags=26%, list=13%, signal=30%"  
GSE41867\_LCMV\_ARMSTRONG\_VS\_CLONE13\_DAY15\_EFFECTOR\_CD8\_TCELL\_DN  
GSE41867\_LCMV\_ARMSTRONG\_VS\_CLONE13\_DAY15\_EFFECTOR\_CD8\_TCELL\_DN  
92 -0.45006344 -1.7137609 0  
0.001646591 0.372 3938 "tags=43%, list=28%, signal=60%"  
GSE15324\_NAIVE\_VS\_ACTIVATED\_CD8\_TCELL\_UP  
GSE15324\_NAIVE\_VS\_ACTIVATED\_CD8\_TCELL\_UP  
132 -0.42250827 -1.7137288 0 0.001639898  
0.372 2279 "tags=31%, list=16%, signal=37%"  
GSE17974\_0H\_VS\_12H\_IN\_VITRO\_ACT\_CD4\_TCELL\_UP  
GSE17974\_0H\_VS\_12H\_IN\_VITRO\_ACT\_CD4\_TCELL\_UP  
111 -0.43642333 -1.7134228 0.001838235  
0.001639988 0.374 1856 "tags=29%, list=13%, signal=33%"  
GSE23925\_LIGHT\_ZONE\_VS\_NAIVE\_BCELL\_UP  
GSE23925\_LIGHT\_ZONE\_VS\_NAIVE\_BCELL\_UP  
147 -0.41501272 -1.7130873 0 0.001647034  
0.377 1594 "tags=27%, list=11%, signal=30%"  
GSE14769\_UNSTIM\_VS\_120MIN\_LPS\_BMDM\_DN  
GSE14769\_UNSTIM\_VS\_120MIN\_LPS\_BMDM\_DN  
156 -0.40956306 -1.7123936 0 0.001660672  
0.381 2377 "tags=31%, list=17%, signal=37%"  
GSE42021\_CD24HI\_TREG\_VS\_CD24HI\_TCONV\_THYMUS\_DN  
GSE42021\_CD24HI\_TREG\_VS\_CD24HI\_TCONV\_THYMUS\_DN  
168 -0.40779024 -1.7108119 0 0.001697779  
0.386 1864 "tags=24%, list=13%, signal=28%"  
GSE23502\_BM\_VS\_COLON\_TUMOR\_MYELOID\_DERIVED\_SUPPRESSOR\_CELL\_UP  
GSE23502\_BM\_VS\_COLON\_TUMOR\_MYELOID\_DERIVED\_SUPPRESSOR\_CELL\_UP  
154 -0.41135037 -1.7092764 0  
0.001731369 0.395 2000 "tags=29%, list=14%, signal=34%"  
GSE22886\_NAIVE\_CD4\_TCELL\_VS\_MONOCYTE\_UP  
GSE22886\_NAIVE\_CD4\_TCELL\_VS\_MONOCYTE\_UP  
140 -0.41370577 -1.7091104 0 0.001724498  
0.395 1551 "tags=24%, list=11%, signal=27%"  
GSE25085\_FETAL\_LIVER\_VS\_FETAL\_BM\_SP4\_THYMIC\_IMPLANT\_DN  
GSE25085\_FETAL\_LIVER\_VS\_FETAL\_BM\_SP4\_THYMIC\_IMPLANT\_DN  
146 -0.40755415 -1.706357 0 0.001820462  
0.415 2113 "tags=28%, list=15%, signal=33%"  
GSE9601\_UNTREATED\_VS\_P13K\_INHIBITOR\_TREATED\_HCMV\_INF\_MONOCYTE\_DN  
GSE9601\_UNTREATED\_VS\_P13K\_INHIBITOR\_TREATED\_HCMV\_INF\_MONOCYTE\_DN  
110 -0.4317575 -1.7055491 0.001869159  
0.001829827 0.418 1829 "tags=29%, list=13%, signal=33%"  
GSE37301\_CD4\_TCELL\_VS\_RAG2\_KO\_NK\_CELL\_UP  
GSE37301\_CD4\_TCELL\_VS\_RAG2\_KO\_NK\_CELL\_UP  
119 -0.42487282 -1.705049 0 0.001829298  
0.42 2047 "tags=26%, list=15%, signal=30%"  
GSE18791\_UNSTIM\_VS\_NEWCATSLE\_VIRUS\_DC\_10H\_DN  
GSE18791\_UNSTIM\_VS\_NEWCATSLE\_VIRUS\_DC\_10H\_DN  
126 -0.41956997 -1.704802 0 0.001825447  
0.421 2035 "tags=37%, list=14%, signal=42%"  
GSE7460\_TCONV\_VS\_TREG\_THYMUS\_DN GSE7460\_TCONV\_VS\_TREG\_THYMUS\_DN  
157 -0.4090257 -1.7047523 0.001941748  
0.001821588 0.422 1128 "tags=24%, list=8%, signal=25%"  
GSE16266\_LPS\_VS\_HEATSHOCK\_AND\_LPS\_STIM\_MEF\_UP  
GSE16266\_LPS\_VS\_HEATSHOCK\_AND\_LPS\_STIM\_MEF\_UP

|                                                                   |             |                                  |                                  |             |
|-------------------------------------------------------------------|-------------|----------------------------------|----------------------------------|-------------|
| 155                                                               | -0.40561864 | -1.7041749                       | 0                                | 0.00184365  |
| 0.428                                                             | 2468        | "tags=34%, list=17%, signal=40%" |                                  |             |
| GSE40274_CTRL_VS_FOXP3_AND_XBP1_TRANSDUCED_ACTIVATED_CD4_TCELL_DN |             |                                  |                                  |             |
| GSE40274_CTRL_VS_FOXP3_AND_XBP1_TRANSDUCED_ACTIVATED_CD4_TCELL_DN |             |                                  |                                  |             |
|                                                                   | 128         | -0.41436398                      | -1.7037076                       | 0           |
| 0.001842958                                                       | 0.43        | 1621                             | "tags=27%, list=11%, signal=30%" |             |
| GSE2128_C57BL6_VS_NOD_CD4CD8_DP_THYMOCYTE_DN                      |             |                                  |                                  |             |
| GSE2128_C57BL6_VS_NOD_CD4CD8_DP_THYMOCYTE_DN                      |             |                                  |                                  |             |
| 131                                                               | -0.41643918 | -1.7030046                       | 0                                | 0.001865048 |
| 0.436                                                             | 2732        | "tags=37%, list=19%, signal=45%" |                                  |             |
| GSE40666_WT_VS_STAT1_KO_CD8_TCELL_DN                              |             |                                  |                                  |             |
| GSE40666_WT_VS_STAT1_KO_CD8_TCELL_DN                              |             |                                  |                                  |             |
| 151                                                               | -0.410175   | -1.7027069                       | 0                                | 0.001867568 |
| 0.438                                                             | 2501        | "tags=34%, list=18%, signal=41%" |                                  |             |
| GSE34392_ST2_KO_VS_WT_DAY8_LCMV_EFFECTOR_CD8_TCELL_DN             |             |                                  |                                  |             |
| GSE34392_ST2_KO_VS_WT_DAY8_LCMV_EFFECTOR_CD8_TCELL_DN             |             |                                  |                                  |             |
| 166                                                               | -0.40624893 | -1.6976887                       | 0                                | 0.002046457 |
| 0.471                                                             | 1776        | "tags=24%, list=13%, signal=27%" |                                  |             |
| GSE14000_UNSTIM_VS_4H_LPS_DC_TRANSLATED_RNA_DN                    |             |                                  |                                  |             |
| GSE14000_UNSTIM_VS_4H_LPS_DC_TRANSLATED_RNA_DN                    |             |                                  |                                  |             |
| 124                                                               | -0.4271932  | -1.6975696                       | 0                                | 0.002038676 |
| 0.471                                                             | 2163        | "tags=35%, list=15%, signal=42%" |                                  |             |
| GSE30083_SP1_VS_SP4_THYMOCYTE_DN GSE30083_SP1_VS_SP4_THYMOCYTE_DN |             |                                  |                                  |             |
|                                                                   | 138         | -0.41596007                      | -1.6966252                       | 0           |
| 0.002065866                                                       | 0.477       | 1236                             | "tags=25%, list=9%, signal=28%"  |             |
| GSE18791_CTRL_VS_NEWCASTLE_VIRUS_DC_10H_DN                        |             |                                  |                                  |             |
| GSE18791_CTRL_VS_NEWCASTLE_VIRUS_DC_10H_DN                        |             |                                  |                                  |             |
| 122                                                               | -0.41945544 | -1.6963807                       | 0                                | 0.002073929 |
| 0.478                                                             | 2544        | "tags=39%, list=18%, signal=47%" |                                  |             |
| GSE9988_ANTI_TREM1_AND_LPS_VS_CTRL_TREATED_MONOCYTES_UP           |             |                                  |                                  |             |
| GSE9988_ANTI_TREM1_AND_LPS_VS_CTRL_TREATED_MONOCYTES_UP           |             |                                  |                                  |             |
| 140                                                               | -0.412152   | -1.6959745                       | 0                                | 0.002075643 |
| 0.479                                                             | 3155        | "tags=42%, list=22%, signal=54%" |                                  |             |
| GSE13522_CTRL_VS_T_CRUZI_Y_STRAIN_INF_SKIN_129_MOUSE_DN           |             |                                  |                                  |             |
| GSE13522_CTRL_VS_T_CRUZI_Y_STRAIN_INF_SKIN_129_MOUSE_DN           |             |                                  |                                  |             |
| 140                                                               | -0.41822404 | -1.6956306                       | 0                                | 0.002086794 |
| 0.482                                                             | 1690        | "tags=24%, list=12%, signal=27%" |                                  |             |
| GSE2770_IL12_VS_TGFB_AND_IL12_TREATED_ACT_CD4_TCELL_48H_DN        |             |                                  |                                  |             |
| GSE2770_IL12_VS_TGFB_AND_IL12_TREATED_ACT_CD4_TCELL_48H_DN        |             |                                  |                                  |             |
| 134                                                               | -0.4146144  | -1.6951514                       | 0                                | 0.002107235 |
| 0.483                                                             | 2369        | "tags=34%, list=17%, signal=40%" |                                  |             |
| GSE19198_CTRL_VS_IL21_TREATED_TCELL_24H_UP                        |             |                                  |                                  |             |
| GSE19198_CTRL_VS_IL21_TREATED_TCELL_24H_UP                        |             |                                  |                                  |             |
| 167                                                               | -0.40100425 | -1.6948799                       | 0                                | 0.002108768 |
| 0.484                                                             | 2215        | "tags=30%, list=16%, signal=35%" |                                  |             |
| GSE3691_IFN_PRODUCING_KILLER_DC_VS_CONVENTIONAL_DC_SPLEEN_UP      |             |                                  |                                  |             |
| GSE3691_IFN_PRODUCING_KILLER_DC_VS_CONVENTIONAL_DC_SPLEEN_UP      |             |                                  |                                  |             |
|                                                                   | 139         | -0.41719437                      | -1.6931294                       | 0           |
| 0.002157296                                                       | 0.494       | 1590                             | "tags=30%, list=11%, signal=34%" |             |
| GSE37301_HEMATOPOIETIC_STEM_CELL_VS_GRAN_MONO_PROGENITOR_UP       |             |                                  |                                  |             |
| GSE37301_HEMATOPOIETIC_STEM_CELL_VS_GRAN_MONO_PROGENITOR_UP       |             |                                  |                                  |             |
| 127                                                               | -0.41651756 | -1.6930326                       | 0                                | 0.002152406 |
| 0.495                                                             | 2079        | "tags=30%, list=15%, signal=35%" |                                  |             |
| GSE5542_IFNG_VS_IFNA_TREATED_EPITHELIAL_CELLS_24H_DN              |             |                                  |                                  |             |

GSE5542\_IFNG\_VS\_IFNA\_TREATED\_EPITHELIAL\_CELLS\_24H\_DN  
137 -0.4108148 -1.6878282 0 0.002330172  
0.524 3575 "tags=38%, list=25%, signal=50%"  
GSE10500\_ARTHROITIC\_SYNOVIAL\_FLUID\_VS\_HEALTHY\_MACROPHAGE\_DN  
GSE10500\_ARTHROITIC\_SYNOVIAL\_FLUID\_VS\_HEALTHY\_MACROPHAGE\_DN  
102 -0.43378052 -1.6872098 0 0.002361488  
0.531 3211 "tags=38%, list=23%, signal=49%"  
GSE40666\_WT\_VS\_STAT4\_KO\_CD8\_TCELL\_WITH\_IFNA\_STIM\_90MIN\_UP  
GSE40666\_WT\_VS\_STAT4\_KO\_CD8\_TCELL\_WITH\_IFNA\_STIM\_90MIN\_UP  
140 -0.40956974 -1.6866432 0 0.002377344  
0.535 2287 "tags=35%, list=16%, signal=41%"  
GSE39556\_CD8A\_DC\_VS\_NK\_CELL\_MOUSE\_3H\_POST\_POLYIC\_INJ\_DN  
GSE39556\_CD8A\_DC\_VS\_NK\_CELL\_MOUSE\_3H\_POST\_POLYIC\_INJ\_DN  
138 -0.41577122 -1.6859304 0 0.002390242  
0.537 1665 "tags=25%, list=12%, signal=28%"  
GSE32423\_MEMORY\_VS\_NAIVE\_CD8\_TCELL\_UP  
GSE32423\_MEMORY\_VS\_NAIVE\_CD8\_TCELL\_UP  
139 -0.41051954 -1.6845796 0 0.002445511  
0.546 791 "tags=18%, list=6%, signal=19%"  
GSE22886\_UNSTIM\_VS\_IL2\_STIM\_NKCELL\_UP  
GSE22886\_UNSTIM\_VS\_IL2\_STIM\_NKCELL\_UP  
131 -0.41428918 -1.682951 0 0.002491413  
0.556 2185 "tags=27%, list=15%, signal=32%"  
GSE39556\_CD8A\_DC\_VS\_NK\_CELL\_DN GSE39556\_CD8A\_DC\_VS\_NK\_CELL\_DN  
155 -0.4077389 -1.6827667 0  
0.002488461 0.558 2278 "tags=25%, list=16%, signal=29%"  
GSE43863\_LY6C\_INT\_CXCR5POS\_VS\_LY6C\_LOW\_CXCR5NEG\_EFFECTOR\_CD4\_TCELL\_D  
N  
GSE43863\_LY6C\_INT\_CXCR5POS\_VS\_LY6C\_LOW\_CXCR5NEG\_EFFECTOR\_CD4\_TCELL\_D  
N  
162 -0.4056476 -1.6822586 0  
0.002503772 0.562 2199 "tags=28%, list=16%, signal=33%"  
GSE2706\_UNSTIM\_VS\_8H\_LPS\_AND\_R848\_DC\_DN  
GSE2706\_UNSTIM\_VS\_8H\_LPS\_AND\_R848\_DC\_DN  
136 -0.41614187 -1.6819981 0 0.002503834  
0.562 1703 "tags=27%, list=12%, signal=31%"  
KAECH\_DAY15\_EFF\_VS\_MEMORY\_CD8\_TCELL\_DN  
KAECH\_DAY15\_EFF\_VS\_MEMORY\_CD8\_TCELL\_DN  
156 -0.40125436 -1.681171 0 0.002528023  
0.565 1371 "tags=25%, list=10%, signal=27%"  
GSE45739\_UNSTIM\_VS\_ACD3\_ACD28\_STIM\_WT\_CD4\_TCELL\_UP  
GSE45739\_UNSTIM\_VS\_ACD3\_ACD28\_STIM\_WT\_CD4\_TCELL\_UP  
144 -0.40830827 -1.6810687 0 0.002531049  
0.568 2496 "tags=34%, list=18%, signal=41%"  
GSE22611\_NOD2\_TRANSD\_VS\_CTRL\_TRANSD\_HEK293\_MDP\_STIM\_2H\_DN  
GSE22611\_NOD2\_TRANSD\_VS\_CTRL\_TRANSD\_HEK293\_MDP\_STIM\_2H\_DN  
103 -0.43041345 -1.6796762 0 0.002581268  
0.575 6024 "tags=59%, list=43%, signal=103%"  
GSE2770\_UNTREATED\_VS\_TGFB\_AND\_IL4\_TREATED\_ACT\_CD4\_TCELL\_4H\_UP  
GSE2770\_UNTREATED\_VS\_TGFB\_AND\_IL4\_TREATED\_ACT\_CD4\_TCELL\_4H\_UP  
133 -0.4083193 -1.6773455 0  
0.002675503 0.59 1916 "tags=27%, list=14%, signal=31%"  
GSE16385\_UNTREATED\_VS\_12H\_ROSIGLITAZONE\_IFNG\_TNF\_TREATED\_MACROPHAGE\_  
UP  
GSE16385\_UNTREATED\_VS\_12H\_ROSIGLITAZONE\_IFNG\_TNF\_TREATED\_MACROPHAGE\_  
UP

UP 152 -0.40473694 -1.676427 0  
0.00271062 0.595 2117 "tags=23%, list=15%, signal=27%"  
GSE12845\_PRE\_GC\_VS\_DARKZONE\_GC\_TONSIL\_BCELL\_UP  
GSE12845\_PRE\_GC\_VS\_DARKZONE\_GC\_TONSIL\_BCELL\_UP  
142 -0.40907437 -1.6758696 0.001869159  
0.002736464 0.601 1747 "tags=27%, list=12%, signal=31%"  
GSE17580\_UNINFECTED\_VS\_S\_MANSONI\_INF\_TEFF\_UP  
GSE17580\_UNINFECTED\_VS\_S\_MANSONI\_INF\_TEFF\_UP  
152 -0.40723372 -1.6753327 0 0.002747434  
0.606 2129 "tags=30%, list=15%, signal=34%"  
GSE3982\_MEMORY\_CD4\_TCELL\_VS\_TH2\_UP  
GSE3982\_MEMORY\_CD4\_TCELL\_VS\_TH2\_UP  
121 -0.41771284 -1.6751261 0 0.002752425  
0.609 2155 "tags=25%, list=15%, signal=29%"  
GSE3982\_MAC\_VS\_EFF\_MEMORY\_CD4\_TCELL\_DN  
GSE3982\_MAC\_VS\_EFF\_MEMORY\_CD4\_TCELL\_DN  
129 -0.4136786 -1.6744858 0.001941748  
0.002769218 0.612 1610 "tags=22%, list=11%, signal=24%"  
GSE6259\_33D1\_POS\_VS\_DEC205\_POS\_FLT3L\_INDUCED\_SPLENIC\_DC\_UP  
GSE6259\_33D1\_POS\_VS\_DEC205\_POS\_FLT3L\_INDUCED\_SPLENIC\_DC\_UP  
146 -0.41005686 -1.6742923 0 0.002765406  
0.612 2183 "tags=25%, list=15%, signal=30%"  
GSE2706\_UNSTIM\_VS\_2H\_R848\_DC\_DN GSE2706\_UNSTIM\_VS\_2H\_R848\_DC\_DN  
137 -0.4067678 -1.6739638 0  
0.002779004 0.613 2627 "tags=34%, list=19%, signal=41%"  
GSE2405\_0H\_VS\_12H\_A\_PHAGOCYTOPHILUM\_STIM\_NEUTROPHIL\_UP  
GSE2405\_0H\_VS\_12H\_A\_PHAGOCYTOPHILUM\_STIM\_NEUTROPHIL\_UP  
149 -0.40432888 -1.6736842 0 0.002783784  
0.615 1790 "tags=25%, list=13%, signal=28%"  
GSE7852\_THYMUS\_VS\_FAT\_TREG\_DN GSE7852\_THYMUS\_VS\_FAT\_TREG\_DN  
141 -0.4037398 -1.6722692 0  
0.002872137 0.629 1271 "tags=21%, list=9%, signal=23%"  
GSE16385\_ROSIGLITAZONE\_IL4\_VS\_IFNG\_TNF\_STIM\_MACROPHAGE\_UP  
GSE16385\_ROSIGLITAZONE\_IL4\_VS\_IFNG\_TNF\_STIM\_MACROPHAGE\_UP  
147 -0.40205547 -1.6719382 0 0.002879381  
0.632 1856 "tags=27%, list=13%, signal=31%"  
GSE7852\_TREG\_VS\_TCONV\_LN\_DN GSE7852\_TREG\_VS\_TCONV\_LN\_DN  
155 -0.40116882 -1.6715355 0  
0.00289822 0.635 2280 "tags=33%, list=16%, signal=39%"  
GSE25123\_WT\_VS\_PPARG\_KO\_MACROPHAGE\_ROSIGLITAZONE\_STIM\_UP  
GSE25123\_WT\_VS\_PPARG\_KO\_MACROPHAGE\_ROSIGLITAZONE\_STIM\_UP  
131 -0.41535485 -1.6712002 0 0.002896967  
0.636 3344 "tags=40%, list=24%, signal=53%"  
GSE41867\_DAY6\_VS\_DAY15\_LCMV\_CLONE13\_EFFECTOR\_CD8\_TCELL\_UP  
GSE41867\_DAY6\_VS\_DAY15\_LCMV\_CLONE13\_EFFECTOR\_CD8\_TCELL\_UP  
105 -0.4267985 -1.6698467 0 0.002972104  
0.646 4708 "tags=45%, list=33%, signal=67%"  
GSE44649\_WT\_VS\_MIR155\_KO\_NAIVE\_CD8\_TCELL\_UP  
GSE44649\_WT\_VS\_MIR155\_KO\_NAIVE\_CD8\_TCELL\_UP  
148 -0.4044302 -1.6694118 0 0.002990403  
0.648 2264 "tags=30%, list=16%, signal=35%"  
GSE37301\_PRO\_BCELL\_VS GRANULOCYTE\_MONOCYTE\_PROGENITOR\_UP  
GSE37301\_PRO\_BCELL\_VS GRANULOCYTE\_MONOCYTE\_PROGENITOR\_UP  
115 -0.41971475 -1.6652846 0.001883239

0.003183652 0.672 1996 "tags=34%, list=14%, signal=39%"  
GSE22886\_NAIVE\_CD4\_TCELL\_VS\_48H\_ACT\_TH2\_UP  
GSE22886\_NAIVE\_CD4\_TCELL\_VS\_48H\_ACT\_TH2\_UP  
132 -0.40502128 -1.6648492 0 0.003200981  
0.675 1327 "tags=22%, list=9%, signal=24%"  
GSE37605\_TREG\_VS\_TCONV\_NOD\_FOXP3\_FUSION\_GFP\_UP  
GSE37605\_TREG\_VS\_TCONV\_NOD\_FOXP3\_FUSION\_GFP\_UP  
104 -0.42222226 -1.6647601 0.001937985  
0.003198677 0.675 2945 "tags=31%, list=21%, signal=39%"  
GSE7852\_TREG\_VS\_TCONV\_THYMUS\_DN GSE7852\_TREG\_VS\_TCONV\_THYMUS\_DN  
132 -0.40441057 -1.6613408 0  
0.003386346 0.698 1844 "tags=27%, list=13%, signal=31%"  
GSE9988\_ANTI\_TREM1\_VS\_LPS\_MONOCYTE\_DN  
GSE9988\_ANTI\_TREM1\_VS\_LPS\_MONOCYTE\_DN  
145 -0.40049943 -1.6610361 0 0.003391854  
0.701 2366 "tags=32%, list=17%, signal=39%"  
GSE3982\_MAC\_VS\_TH2\_UP GSE3982\_MAC\_VS\_TH2\_UP  
156 -0.39934215 -1.6589198 0 0.003474759  
0.71 1643 "tags=23%, list=12%, signal=26%"  
GSE37301\_MULTIPOTENT\_PROGENITOR\_VS\_LYMPHOID\_PRIMED\_MPP\_DN  
GSE37301\_MULTIPOTENT\_PROGENITOR\_VS\_LYMPHOID\_PRIMED\_MPP\_DN  
153 -0.4017089 -1.6582713 0 0.003510292  
0.715 1968 "tags=29%, list=14%, signal=34%"  
GSE19772\_CTRL\_VS\_HCMV\_INF\_MONOCYTES\_UP  
GSE19772\_CTRL\_VS\_HCMV\_INF\_MONOCYTES\_UP  
152 -0.40011454 -1.6581514 0 0.003501556  
0.715 1918 "tags=30%, list=14%, signal=34%"  
GSE40666\_NAIVE\_VS\_EFFECTOR\_CD8\_TCELL\_UP  
GSE40666\_NAIVE\_VS\_EFFECTOR\_CD8\_TCELL\_UP  
146 -0.40344888 -1.6574683 0 0.003537078  
0.718 1948 "tags=30%, list=14%, signal=35%"  
GSE11961\_MEMORY\_BCELL\_DAY7\_VS\_PLASMA\_CELL\_DAY7\_UP  
GSE11961\_MEMORY\_BCELL\_DAY7\_VS\_PLASMA\_CELL\_DAY7\_UP  
149 -0.39753613 -1.6571681 0 0.003542164  
0.72 2318 "tags=30%, list=16%, signal=36%"  
GSE19923\_WT\_VS\_HEB\_AND\_E2A\_KO\_DP\_THYMOCYTE\_DN  
GSE19923\_WT\_VS\_HEB\_AND\_E2A\_KO\_DP\_THYMOCYTE\_DN  
166 -0.39069232 -1.6543739 0 0.003661465  
0.729 1827 "tags=28%, list=13%, signal=31%"  
GSE41087\_WT\_VS\_FOXP3\_MUT\_ANTI\_CD3\_CD28\_STIM\_CD4\_TCELL\_UP  
GSE41087\_WT\_VS\_FOXP3\_MUT\_ANTI\_CD3\_CD28\_STIM\_CD4\_TCELL\_UP  
139 -0.40468597 -1.6543543 0 0.003652333  
0.729 2648 "tags=35%, list=19%, signal=42%"  
GSE3982\_MAST\_CELL\_VS\_BASOPHIL\_DN GSE3982\_MAST\_CELL\_VS\_BASOPHIL\_DN  
139 -0.40410802 -1.6533144 0  
0.003708327 0.735 1871 "tags=27%, list=13%, signal=30%"  
GSE40274\_HELIOS\_VS\_FOXP3\_AND\_HELIOS\_TRANSDUCED\_ACTIVATED\_CD4\_TCELL\_U  
P  
GSE40274\_HELIOS\_VS\_FOXP3\_AND\_HELIOS\_TRANSDUCED\_ACTIVATED\_CD4\_TCELL\_U  
P  
149 -0.4046524 -1.6509312 0  
0.00385301 0.752 1942 "tags=30%, list=14%, signal=34%"  
GSE5455\_HEALTHY\_VS\_TUMOR\_BEARING\_MOUSE\_SPLEEN\_MONOCYTE\_UP  
GSE5455\_HEALTHY\_VS\_TUMOR\_BEARING\_MOUSE\_SPLEEN\_MONOCYTE\_UP  
151 -0.40046245 -1.6505505 0 0.003859492

0.754 2441 "tags=29%, list=17%, signal=35%"  
GSE41867\_NAIVE\_VS\_DAY30\_LCMV\_CLONE13\_EXHAUSTED\_CD8\_TCELL\_UP  
GSE41867\_NAIVE\_VS\_DAY30\_LCMV\_CLONE13\_EXHAUSTED\_CD8\_TCELL\_UP  
132 -0.4006375 -1.6505108 0.001872659  
0.003849916 0.755 1254 "tags=22%, list=9%, signal=24%"  
GSE4590\_PRE\_BCELL\_VS\_SMALL\_PRE\_BCELL\_UP  
GSE4590\_PRE\_BCELL\_VS\_SMALL\_PRE\_BCELL\_UP  
125 -0.41432658 -1.6487678 0 0.003955693  
0.762 2073 "tags=26%, list=15%, signal=30%"  
GSE15324\_NAIVE\_VS\_ACTIVATED\_ELF4\_KO\_CD8\_TCELL\_UP  
GSE15324\_NAIVE\_VS\_ACTIVATED\_ELF4\_KO\_CD8\_TCELL\_UP  
140 -0.40382847 -1.6473854 0.003780718  
0.004020309 0.767 1913 "tags=27%, list=14%, signal=31%"  
GSE28237\_FOLLICULAR\_VS\_EARLY\_GC\_BCELL\_UP  
GSE28237\_FOLLICULAR\_VS\_EARLY\_GC\_BCELL\_UP  
120 -0.40780398 -1.6473048 0 0.004018193  
0.767 2648 "tags=33%, list=19%, signal=41%"  
GSE21774\_CD62L\_POS\_CD56\_BRIGHT\_VS\_CD62L\_NEG\_CD56\_DIM\_NK\_CELL\_DN  
GSE21774\_CD62L\_POS\_CD56\_BRIGHT\_VS\_CD62L\_NEG\_CD56\_DIM\_NK\_CELL\_DN  
137 -0.40557793 -1.6470437 0.001912046  
0.004021317 0.77 2392 "tags=28%, list=17%, signal=33%"  
GSE40666\_UNTREATED\_VS\_IFNA\_STIM\_STAT1\_KO\_CD8\_TCELL\_90MIN\_DN  
GSE40666\_UNTREATED\_VS\_IFNA\_STIM\_STAT1\_KO\_CD8\_TCELL\_90MIN\_DN  
132 -0.4092058 -1.646763 0 0.004021945  
0.772 2215 "tags=28%, list=16%, signal=33%"  
GSE36078\_UNTREATED\_VS\_AD5\_INF\_MOUSE\_LUNG\_DC\_UP  
GSE36078\_UNTREATED\_VS\_AD5\_INF\_MOUSE\_LUNG\_DC\_UP  
148 -0.3984089 -1.6461449 0 0.004035769  
0.774 3762 "tags=31%, list=27%, signal=42%"  
GSE18791\_CTRL\_VS\_NEWCASTLE\_VIRUS\_DC\_4H\_DN  
GSE18791\_CTRL\_VS\_NEWCASTLE\_VIRUS\_DC\_4H\_DN  
119 -0.40910628 -1.6439706 0 0.004157482  
0.788 1766 "tags=28%, list=13%, signal=31%"  
GSE45365\_HEALTHY\_VS\_MCMV\_INFECTION\_CD11B\_DC\_IFNAR\_KO\_UP  
GSE45365\_HEALTHY\_VS\_MCMV\_INFECTION\_CD11B\_DC\_IFNAR\_KO\_UP  
118 -0.41210642 -1.6405944 0.001904762  
0.004374199 0.81 2212 "tags=31%, list=16%, signal=37%"  
GSE1460\_INTRATHYMIC\_T\_PROGENITOR\_VS\_CD4\_THYMOCYTE\_DN  
GSE1460\_INTRATHYMIC\_T\_PROGENITOR\_VS\_CD4\_THYMOCYTE\_DN  
154 -0.39080632 -1.6405138 0 0.004371047  
0.811 1790 "tags=23%, list=13%, signal=26%"  
GSE20727\_CTRL\_VS\_H202\_TREATED\_DC\_DN  
GSE20727\_CTRL\_VS\_H202\_TREATED\_DC\_DN  
134 -0.40041155 -1.6381507 0 0.004570018  
0.823 1909 "tags=25%, list=14%, signal=28%"  
GSE22935\_UNSTIM\_VS\_48H\_MBOVIS\_BCG\_STIM\_MYD88\_KO\_MACROPHAGE\_UP  
GSE22935\_UNSTIM\_VS\_48H\_MBOVIS\_BCG\_STIM\_MYD88\_KO\_MACROPHAGE\_UP  
135 -0.40182483 -1.6375403 0.002  
0.004600104 0.824 2738 "tags=35%, list=19%, signal=43%"  
GSE11057\_NAIVE\_VS\_EFF\_MEMORY\_CD4\_TCELL\_UP  
GSE11057\_NAIVE\_VS\_EFF\_MEMORY\_CD4\_TCELL\_UP  
115 -0.40773228 -1.6374357 0.001926782  
0.004591039 0.825 1837 "tags=27%, list=13%, signal=31%"  
GSE25123\_IL4\_VS\_IL4\_AND\_ROSIGLITAZONE\_STIM\_MACROPHAGE\_DAY10\_DN

GSE25123\_IL4\_VS\_IL4\_AND\_ROSIGLITAZONE\_STIM\_MACROPHAGE\_DAY10\_DN  
124 -0.4075708 -1.6363295 0  
0.004643772 0.829 1307 "tags=20%, list=9%, signal=22%"  
GSE3720\_VD1\_VS\_VD2\_GAMMADELTA\_TCELL\_WITH\_PMA\_STIM\_UP  
GSE3720\_VD1\_VS\_VD2\_GAMMADELTA\_TCELL\_WITH\_PMA\_STIM\_UP  
136 -0.39855462 -1.635717 0 0.004680765  
0.83 2694 "tags=33%, list=19%, signal=41%"  
GSE21379\_TFH\_VS\_NON\_TFH\_CD4\_TCELL\_DN  
GSE21379\_TFH\_VS\_NON\_TFH\_CD4\_TCELL\_DN  
136 -0.39534524 -1.6353234 0.001980198  
0.004694788 0.831 5045 "tags=49%, list=36%, signal=75%"  
GSE35825\_IFNA\_VS\_IFNG\_STIM\_MACROPHAGE\_UP  
GSE35825\_IFNA\_VS\_IFNG\_STIM\_MACROPHAGE\_UP  
133 -0.4040404 -1.6352285 0 0.004688252  
0.832 2377 "tags=30%, list=17%, signal=36%"  
GSE411\_UNSTIM\_VS\_100MIN\_IL6\_STIM\_SOCS3\_KO\_MACROPHAGE\_UP  
GSE411\_UNSTIM\_VS\_100MIN\_IL6\_STIM\_SOCS3\_KO\_MACROPHAGE\_UP  
141 -0.39980486 -1.6322647 0.001904762  
0.00488818 0.847 2169 "tags=34%, list=15%, signal=40%"  
GSE20366\_TREG\_VS\_NAIVE\_CD4\_TCELL\_DEC205\_CONVERSION\_DN  
GSE20366\_TREG\_VS\_NAIVE\_CD4\_TCELL\_DEC205\_CONVERSION\_DN  
130 -0.40166467 -1.6289277 0 0.005119196  
0.862 2313 "tags=28%, list=16%, signal=33%"  
GSE9988\_ANTI\_TREM1\_VS\_LOW\_LPS\_MONOCYTE\_DN  
GSE9988\_ANTI\_TREM1\_VS\_LOW\_LPS\_MONOCYTE\_DN  
146 -0.39358625 -1.6288894 0 0.00510888  
0.862 2155 "tags=30%, list=15%, signal=35%"  
GSE2706\_R848\_VS\_LPS\_2H\_STIM\_DC\_DN GSE2706\_R848\_VS\_LPS\_2H\_STIM\_DC\_DN  
110 -0.41399896 -1.6286458 0.001976285  
0.005121483 0.864 2115 "tags=27%, list=15%, signal=32%"  
GSE9509\_LPS\_VS\_LPS\_AND\_IL10\_STIM\_IL10\_KO\_MACROPHAGE\_10MIN\_UP  
GSE9509\_LPS\_VS\_LPS\_AND\_IL10\_STIM\_IL10\_KO\_MACROPHAGE\_10MIN\_UP  
158 -0.3894055 -1.6254147 0  
0.005360055 0.882 2677 "tags=32%, list=19%, signal=39%"  
GSE20366\_TREG\_VS\_NAIVE\_CD4\_TCELL\_DEC205\_CONVERSION\_UP  
GSE20366\_TREG\_VS\_NAIVE\_CD4\_TCELL\_DEC205\_CONVERSION\_UP  
151 -0.39212754 -1.625332 0.001923077  
0.005354077 0.883 1779 "tags=26%, list=13%, signal=29%"  
GSE7460\_WT\_VS\_FOXP3\_HET\_ACT\_TCONV\_UP  
GSE7460\_WT\_VS\_FOXP3\_HET\_ACT\_TCONV\_UP  
142 -0.39394847 -1.6235074 0.001964637  
0.005480834 0.89 1459 "tags=23%, list=10%, signal=26%"  
GSE30971\_CTRL\_VS\_LPS\_STIM\_MACROPHAGE\_WBP7\_KO\_4H\_DN  
GSE30971\_CTRL\_VS\_LPS\_STIM\_MACROPHAGE\_WBP7\_KO\_4H\_DN  
132 -0.3960121 -1.6232682 0 0.005477131  
0.891 2344 "tags=34%, list=17%, signal=40%"  
GSE36888\_UNTREATED\_VS\_IL2\_TREATED\_STAT5\_AB\_KNOCKIN\_TCELL\_2H\_UP  
GSE36888\_UNTREATED\_VS\_IL2\_TREATED\_STAT5\_AB\_KNOCKIN\_TCELL\_2H\_UP  
141 -0.3949722 -1.6231383 0  
0.005470975 0.892 2610 "tags=34%, list=18%, signal=41%"  
GSE15735\_2H\_VS\_12H\_HDAC\_INHIBITOR\_TREATED\_CD4\_TCELL\_UP  
GSE15735\_2H\_VS\_12H\_HDAC\_INHIBITOR\_TREATED\_CD4\_TCELL\_UP  
150 -0.39382732 -1.6220725 0.001851852  
0.005556309 0.894 2183 "tags=33%, list=15%, signal=38%"



GSE36009\_WT\_VS\_NLRP10\_KO\_DC\_UP      GSE36009\_WT\_VS\_NLRP10\_KO\_DC\_UP  
142      -0.38960186      -1.622033      0  
0.005540014      0.894      2125      "tags=27%, list=15%, signal=31%"  
GSE40666\_UNTREATED\_VS\_IFNA\_STIM\_STAT4\_KO\_EFFECTOR\_CD8\_TCELL\_90MIN\_DN  
  
GSE40666\_UNTREATED\_VS\_IFNA\_STIM\_STAT4\_KO\_EFFECTOR\_CD8\_TCELL\_90MIN\_DN  
127      -0.40544745      -1.6214943  
0.003891051      0.005575488      0.9      1817      "tags=28%,  
list=13%, signal=31%"  
GSE39556\_UNTREATED\_VS\_3H\_POLYIC\_INJ\_MOUSE\_CD8A\_DC\_DN  
GSE39556\_UNTREATED\_VS\_3H\_POLYIC\_INJ\_MOUSE\_CD8A\_DC\_DN  
151      -0.38719705      -1.6202565      0.001798561  
0.005694254      0.904      1817      "tags=23%, list=13%, signal=26%"  
GSE7219\_UNSTIM\_VS\_LPS\_AND\_ANTI\_CD40\_STIM\_DC\_UP  
GSE7219\_UNSTIM\_VS\_LPS\_AND\_ANTI\_CD40\_STIM\_DC\_UP  
140      -0.39107957      -1.6169652      0.003831418  
0.005976492      0.917      1257      "tags=26%, list=9%, signal=28%"  
GSE4590\_PRE\_BCELL\_VS\_LARGE\_PRE\_BCELL\_DN  
GSE4590\_PRE\_BCELL\_VS\_LARGE\_PRE\_BCELL\_DN  
122      -0.3981517      -1.615896      0      0.006073548  
0.919      2476      "tags=30%, list=18%, signal=35%"  
GSE17974\_IL4\_AND\_ANTI\_IL12\_VS\_UNTREATED\_24H\_ACT\_CD4\_TCELL\_DN  
GSE17974\_IL4\_AND\_ANTI\_IL12\_VS\_UNTREATED\_24H\_ACT\_CD4\_TCELL\_DN  
112      -0.41148978      -1.6151416      0  
0.006114328      0.921      830      "tags=22%, list=6%, signal=24%"  
GSE21546\_UNSTIM\_VS\_ANTI\_CD3\_STIM\_DP\_THYMOCYTES\_UP  
GSE21546\_UNSTIM\_VS\_ANTI\_CD3\_STIM\_DP\_THYMOCYTES\_UP  
134      -0.3981407      -1.614012      0      0.006205672  
0.923      3203      "tags=37%, list=23%, signal=48%"  
GSE17974\_0.5H\_VS\_72H\_IL4\_AND\_ANTI\_IL12\_ACT\_CD4\_TCELL\_UP  
GSE17974\_0.5H\_VS\_72H\_IL4\_AND\_ANTI\_IL12\_ACT\_CD4\_TCELL\_UP  
129      -0.3945458      -1.6128851      0      0.006289237  
0.927      2419      "tags=31%, list=17%, signal=37%"  
GSE9988\_ANTI\_TREM1\_VS\_ANTI\_TREM1\_AND\_LPS\_MONOCYTE\_DN  
GSE9988\_ANTI\_TREM1\_VS\_ANTI\_TREM1\_AND\_LPS\_MONOCYTE\_DN  
134      -0.39877194      -1.6123699      0.001953125  
0.006312195      0.929      2649      "tags=34%, list=19%, signal=41%"  
GSE29618\_BCELL\_VS\_MONOCYTE\_UP      GSE29618\_BCELL\_VS\_MONOCYTE\_UP  
120      -0.4012917      -1.6123375      0  
0.006296559      0.929      621      "tags=15%, list=4%, signal=16%"  
GSE3691\_IFN\_PRODUCING\_KILLER\_DC\_VS\_PLASMACYTOID\_DC\_SPLEEN\_UP  
GSE3691\_IFN\_PRODUCING\_KILLER\_DC\_VS\_PLASMACYTOID\_DC\_SPLEEN\_UP  
139      -0.38944462      -1.6108602      0.002  
0.006407614      0.934      1885      "tags=28%, list=13%, signal=32%"  
GSE2706\_UNSTIM\_VS\_8H\_R848\_DC\_DN      GSE2706\_UNSTIM\_VS\_8H\_R848\_DC\_DN  
135      -0.3910702      -1.6093477      0.001872659  
0.006528288      0.937      2433      "tags=36%, list=17%, signal=43%"  
GSE40277\_EOS\_AND\_LEF1\_TRANSDUCED\_VS\_CTRL\_CD4\_TCELL\_UP  
GSE40277\_EOS\_AND\_LEF1\_TRANSDUCED\_VS\_CTRL\_CD4\_TCELL\_UP  
144      -0.38867775      -1.609068      0      0.006540928  
0.937      2193      "tags=33%, list=16%, signal=39%"  
GSE41176\_WT\_VS\_TAK1\_KO\_ANTI\_IGM\_STIM\_BCELL\_1H\_UP  
GSE41176\_WT\_VS\_TAK1\_KO\_ANTI\_IGM\_STIM\_BCELL\_1H\_UP  
141      -0.3887196      -1.6076639      0.001851852

0.00664602 0.941 4475 "tags=43%, list=32%, signal=62%"  
GSE17721\_PAM3CSK4\_VS\_GADIQUIMOD\_1H\_BMDC\_UP  
GSE17721\_PAM3CSK4\_VS\_GADIQUIMOD\_1H\_BMDC\_UP  
169 -0.3826013 -1.6056609 0.001930502  
0.006805286 0.943 2524 "tags=27%, list=18%, signal=33%"  
GSE24574\_BCL6\_HIGH\_VS\_LOW\_TFH\_CD4\_TCELL\_UP  
GSE24574\_BCL6\_HIGH\_VS\_LOW\_TFH\_CD4\_TCELL\_UP  
140 -0.39106673 -1.6049176 0.001838235  
0.006873612 0.943 2344 "tags=30%, list=17%, signal=36%"  
GSE29618\_BCELL\_VS\_MDC\_UP GSE29618\_BCELL\_VS\_MDC\_UP  
126 -0.39352882 -1.6046565 0.001937985  
0.006894464 0.945 2084 "tags=28%, list=15%, signal=32%"  
GSE41867\_NAIVE\_VS\_DAY6\_LCMV\_ARMSTRONG\_EFFECTOR\_CD8\_TCELL\_UP  
GSE41867\_NAIVE\_VS\_DAY6\_LCMV\_ARMSTRONG\_EFFECTOR\_CD8\_TCELL\_UP  
144 -0.3851613 -1.6032231 0 0.00703307  
0.949 1981 "tags=25%, list=14%, signal=29%"  
GSE14000\_UNSTIM\_VS\_16H\_LPS\_DC\_TRANSLATED\_RNA\_DN  
GSE14000\_UNSTIM\_VS\_16H\_LPS\_DC\_TRANSLATED\_RNA\_DN  
124 -0.39434585 -1.602858 0.001960784  
0.007043854 0.949 2248 "tags=35%, list=16%, signal=41%"  
GSE23502\_WT\_VS\_HDC\_KO\_MYELOID\_DERIVED\_SUPPRESSOR\_CELL\_BM\_UP  
GSE23502\_WT\_VS\_HDC\_KO\_MYELOID\_DERIVED\_SUPPRESSOR\_CELL\_BM\_UP  
136 -0.3875138 -1.6025996 0 0.007042928  
0.95 2322 "tags=32%, list=16%, signal=37%"  
GSE29164\_CD8\_TCELL\_VS\_CD8\_TCELL\_AND\_IL12\_TREATED\_MELANOMA\_DAY3\_DN  
GSE29164\_CD8\_TCELL\_VS\_CD8\_TCELL\_AND\_IL12\_TREATED\_MELANOMA\_DAY3\_DN  
153 -0.38712052 -1.6014016 0.003745318  
0.007158344 0.955 1459 "tags=26%, list=10%, signal=29%"  
GSE26928\_EFF\_MEMORY\_VS\_CXCR5\_POS\_CD4\_TCELL\_DN  
GSE26928\_EFF\_MEMORY\_VS\_CXCR5\_POS\_CD4\_TCELL\_DN  
102 -0.40692365 -1.6012783 0 0.00714545  
0.955 4356 "tags=54%, list=31%, signal=77%"  
GSE45365\_BCELL\_VS\_CD8\_TCELL\_UP GSE45365\_BCELL\_VS\_CD8\_TCELL\_UP  
98 -0.4156733 -1.6010911 0.002008032  
0.007144159 0.956 4346 "tags=41%, list=31%, signal=59%"  
GSE40184\_HEALTHY\_VS\_HCV\_INFECTED\_DONOR\_PBMC\_UP  
GSE40184\_HEALTHY\_VS\_HCV\_INFECTED\_DONOR\_PBMC\_UP  
142 -0.39269647 -1.5997213 0 0.007251534  
0.959 3799 "tags=44%, list=27%, signal=60%"  
GSE20366\_TREG\_VS\_TCONV\_UP GSE20366\_TREG\_VS\_TCONV\_UP  
140 -0.38772774 -1.599565 0.001937985  
0.007254666 0.959 2199 "tags=27%, list=16%, signal=32%"  
GSE41867\_NAIVE\_VS\_DAY6\_LCMV\_ARMSTRONG\_EFFECTOR\_CD8\_TCELL\_DN  
GSE41867\_NAIVE\_VS\_DAY6\_LCMV\_ARMSTRONG\_EFFECTOR\_CD8\_TCELL\_DN  
146 -0.38654312 -1.5985401 0 0.007346891  
0.96 2069 "tags=29%, list=15%, signal=34%"  
GSE37605\_FOXP3\_FUSION\_GFP\_VS\_IRES\_GFP\_TREG\_C57BL6\_DN  
GSE37605\_FOXP3\_FUSION\_GFP\_VS\_IRES\_GFP\_TREG\_C57BL6\_DN  
142 -0.38845545 -1.5981811 0 0.00735909  
0.962 2631 "tags=30%, list=19%, signal=37%"  
GSE23568\_ID3\_TRANSDUCE\_VS\_ID3\_KO\_CD8\_TCELL\_DN  
GSE23568\_ID3\_TRANSDUCE\_VS\_ID3\_KO\_CD8\_TCELL\_DN  
146 -0.3850438 -1.5972935 0 0.007444131  
0.964 1771 "tags=29%, list=13%, signal=33%"

GSE21063\_CTRL\_VS\_ANTI\_IGM\_STIM\_BCELL\_NFATC1\_KO\_8H\_UP  
GSE21063\_CTRL\_VS\_ANTI\_IGM\_STIM\_BCELL\_NFATC1\_KO\_8H\_UP  
135 -0.3900473 -1.5964215 0.001908397  
0.007528677 0.964 2119 "tags=28%, list=15%, signal=33%"  
GSE411\_WT\_VS\_SOCS3\_KO\_MACROPHAGE\_IL6\_STIM\_400MIN\_DN  
GSE411\_WT\_VS\_SOCS3\_KO\_MACROPHAGE\_IL6\_STIM\_400MIN\_DN  
137 -0.392869 -1.5951787 0 0.007637747  
0.966 2638 "tags=35%, list=19%, signal=43%"  
GSE21033\_CTRL\_VS\_POLYIC\_STIM\_DC\_6H\_UP  
GSE21033\_CTRL\_VS\_POLYIC\_STIM\_DC\_6H\_UP  
143 -0.38670015 -1.5951362 0.003861004  
0.007626167 0.966 2440 "tags=26%, list=17%, signal=31%"  
GSE25123\_WT\_VS\_PPARG\_KO\_MACROPHAGE\_IL4\_AND\_ROSIGLITAZONE\_STIM\_DN  
GSE25123\_WT\_VS\_PPARG\_KO\_MACROPHAGE\_IL4\_AND\_ROSIGLITAZONE\_STIM\_DN  
141 -0.38988605 -1.5944293 0.001901141  
0.007684799 0.967 1855 "tags=22%, list=13%, signal=25%"  
GSE2770\_TGFB\_AND\_IL4\_VS\_TGFB\_AND\_IL12\_TREATED\_ACT\_CD4\_TCELL\_2H\_UP  
GSE2770\_TGFB\_AND\_IL4\_VS\_TGFB\_AND\_IL12\_TREATED\_ACT\_CD4\_TCELL\_2H\_UP  
102 -0.40368718 -1.5943532 0.003663004  
0.007682345 0.968 2266 "tags=25%, list=16%, signal=29%"  
GSE45365\_HEALTHY\_VS\_MCMV\_INFECTION\_BCELL\_IFNAR\_KO\_DN  
GSE45365\_HEALTHY\_VS\_MCMV\_INFECTION\_BCELL\_IFNAR\_KO\_DN  
135 -0.38769436 -1.592725 0 0.007860198  
0.969 2192 "tags=28%, list=16%, signal=33%"  
GSE42021\_CD24HI\_VS\_CD24LOW\_TREG\_THYMUS\_DN  
GSE42021\_CD24HI\_VS\_CD24LOW\_TREG\_THYMUS\_DN  
132 -0.39510512 -1.5922682 0.003929273  
0.007877513 0.969 1841 "tags=25%, list=13%, signal=28%"  
GSE4748\_CTRL\_VS\_LPS\_AND\_CYANOBACTERIUM\_LP SLIKE\_STIM\_DC\_3H\_UP  
GSE4748\_CTRL\_VS\_LPS\_AND\_CYANOBACTERIUM\_LP SLIKE\_STIM\_DC\_3H\_UP  
150 -0.3790808 -1.5915681 0  
0.007953077 0.971 1610 "tags=20%, list=11%, signal=22%"  
GSE39556\_UNTREATED\_VS\_3H\_POLYIC\_INJ\_MOUSE\_NK\_CELL\_DN  
GSE39556\_UNTREATED\_VS\_3H\_POLYIC\_INJ\_MOUSE\_NK\_CELL\_DN  
150 -0.38327104 -1.5912834 0.001915709  
0.007963408 0.971 1817 "tags=23%, list=13%, signal=26%"  
GSE21379\_TFH\_VS\_NON\_TFH\_SAP\_KO\_CD4\_TCELL\_DN  
GSE21379\_TFH\_VS\_NON\_TFH\_SAP\_KO\_CD4\_TCELL\_DN  
147 -0.38695747 -1.5893068 0.004008016  
0.008171191 0.975 3574 "tags=39%, list=25%, signal=51%"  
GSE42021\_CD24HI\_VS\_CD24INT\_TCONV\_THYMUS\_DN  
GSE42021\_CD24HI\_VS\_CD24INT\_TCONV\_THYMUS\_DN  
145 -0.38188788 -1.5892704 0.001897533  
0.008158566 0.975 2403 "tags=31%, list=17%, signal=37%"  
GSE17301\_ACD3\_ACD28\_VS\_ACD3\_ACD28\_AND\_IFNA2\_STIM\_CD8\_TCELL\_DN  
GSE17301\_ACD3\_ACD28\_VS\_ACD3\_ACD28\_AND\_IFNA2\_STIM\_CD8\_TCELL\_DN  
145 -0.38286 -1.5888107 0.005928854  
0.00818354 0.976 1237 "tags=22%, list=9%, signal=24%"  
GSE40274\_GATA1\_VS\_FOXP3\_AND\_GATA1\_TRANSDUCE D\_ACTIVATED\_CD4\_TCELL\_UP  
GSE40274\_GATA1\_VS\_FOXP3\_AND\_GATA1\_TRANSDUCE D\_ACTIVATED\_CD4\_TCELL\_UP  
155 -0.38191912 -1.5886055 0  
0.008181967 0.976 2145 "tags=28%, list=15%, signal=33%"  
GSE10147\_IL3\_VS\_IL3\_AND\_HIVP17\_STIM\_PDC\_UP  
GSE10147\_IL3\_VS\_IL3\_AND\_HIVP17\_STIM\_PDC\_UP

|                                                            |             |                                  |                                  |             |
|------------------------------------------------------------|-------------|----------------------------------|----------------------------------|-------------|
| 126                                                        | -0.39307868 | -1.5881659                       | 0                                | 0.008213279 |
| 0.978                                                      | 2847        | "tags=40%, list=20%, signal=49%" |                                  |             |
| GSE360_T_GONDII_VS_B_MALAYI_LOW_DOSE_DC_UP                 |             |                                  |                                  |             |
| GSE360_T_GONDII_VS_B_MALAYI_LOW_DOSE_DC_UP                 |             |                                  |                                  |             |
| 136                                                        | -0.38702202 | -1.5869563                       | 0                                | 0.008336738 |
| 0.981                                                      | 1766        | "tags=24%, list=13%, signal=27%" |                                  |             |
| GSE30971_WBP7_HET_VS_KO_MACROPHAGE_DN                      |             |                                  |                                  |             |
| GSE30971_WBP7_HET_VS_KO_MACROPHAGE_DN                      |             |                                  |                                  |             |
| 142                                                        | -0.3869305  | -1.586428                        | 0                                | 0.008387533 |
| 0.981                                                      | 1428        | "tags=21%, list=10%, signal=23%" |                                  |             |
| GSE24142_EARLY_THYMIC_PROGENITOR_VS_DN2_THYMOCYTE_UP       |             |                                  |                                  |             |
| GSE24142_EARLY_THYMIC_PROGENITOR_VS_DN2_THYMOCYTE_UP       |             |                                  |                                  |             |
| 163                                                        | -0.3767616  | -1.5849375                       | 0                                | 0.008525218 |
| 0.981                                                      | 1051        | "tags=22%, list=7%, signal=24%"  |                                  |             |
| GSE7460_WT_VS_FOXP3_HET_ACT_WITH_TGFB_TCONV_UP             |             |                                  |                                  |             |
| GSE7460_WT_VS_FOXP3_HET_ACT_WITH_TGFB_TCONV_UP             |             |                                  |                                  |             |
| 134                                                        | -0.3922477  | -1.5832243                       | 0                                | 0.008697243 |
| 0.984                                                      | 1459        | "tags=22%, list=10%, signal=25%" |                                  |             |
| GSE14308_TH2_VS_TH17_DN                                    |             |                                  |                                  |             |
| GSE14308_TH2_VS_TH17_DN                                    |             |                                  |                                  |             |
| 137                                                        | -0.388811   | -1.5831475                       | 0                                | 0.008676926 |
| 0.984                                                      | 1948        | "tags=26%, list=14%, signal=30%" |                                  |             |
| GSE9988_ANTI_TREM1_AND_LPS_VS_VEHICLE_TREATED_MONOCYTES_UP |             |                                  |                                  |             |
| GSE9988_ANTI_TREM1_AND_LPS_VS_VEHICLE_TREATED_MONOCYTES_UP |             |                                  |                                  |             |
| 125                                                        | -0.38897938 | -1.5814885                       | 0.007751938                      |             |
| 0.008886628                                                | 0.988       | 2911                             | "tags=38%, list=21%, signal=48%" |             |
| GSE13522_WT_VS_IFNAR_KO_SKING_T_CRUZI_Y_STRAIN_INF_DN      |             |                                  |                                  |             |
| GSE13522_WT_VS_IFNAR_KO_SKING_T_CRUZI_Y_STRAIN_INF_DN      |             |                                  |                                  |             |
| 143                                                        | -0.38091114 | -1.5814135                       | 0.001897533                      |             |
| 0.008870332                                                | 0.988       | 2980                             | "tags=29%, list=21%, signal=37%" |             |
| GSE7460_FOXP3_MUT_VS_WT_ACT_TCONV_UP                       |             |                                  |                                  |             |
| GSE7460_FOXP3_MUT_VS_WT_ACT_TCONV_UP                       |             |                                  |                                  |             |
| 153                                                        | -0.38261318 | -1.5806271                       | 0.001838235                      |             |
| 0.008977253                                                | 0.988       | 1481                             | "tags=24%, list=10%, signal=26%" |             |
| GSE22886_IGG_IGA_MEMORY_BCELL_VS_BLOOD_PLASMA_CELL_UP      |             |                                  |                                  |             |
| GSE22886_IGG_IGA_MEMORY_BCELL_VS_BLOOD_PLASMA_CELL_UP      |             |                                  |                                  |             |
| 138                                                        | -0.38305852 | -1.5805715                       | 0                                | 0.00896287  |
| 0.988                                                      | 3293        | "tags=37%, list=23%, signal=48%" |                                  |             |
| GSE33292_DN3_THYMOCYTE_VS_TCF1_KO_TCELL_LYMPHOMA_UP        |             |                                  |                                  |             |
| GSE33292_DN3_THYMOCYTE_VS_TCF1_KO_TCELL_LYMPHOMA_UP        |             |                                  |                                  |             |
| 160                                                        | -0.37645853 | -1.580569                        | 0                                | 0.008940006 |
| 0.988                                                      | 1998        | "tags=24%, list=14%, signal=27%" |                                  |             |
| GSE20754_WT_VS_TCF1_KO_MEMORY_CD8_TCELL_UP                 |             |                                  |                                  |             |
| GSE20754_WT_VS_TCF1_KO_MEMORY_CD8_TCELL_UP                 |             |                                  |                                  |             |
| 143                                                        | -0.38400957 | -1.5804969                       | 0.005725191                      |             |
| 0.008936618                                                | 0.989       | 1867                             | "tags=28%, list=13%, signal=32%" |             |
| GSE36392_TYPE_2_MYELOID_VS_EOSINOPHIL_IL25_TREATED_LUNG_DN |             |                                  |                                  |             |
| GSE36392_TYPE_2_MYELOID_VS_EOSINOPHIL_IL25_TREATED_LUNG_DN |             |                                  |                                  |             |
| 134                                                        | -0.3934251  | -1.5799325                       | 0                                | 0.008979996 |
| 0.99                                                       | 1766        | "tags=25%, list=13%, signal=28%" |                                  |             |
| GSE360_HIGH_DOSE_B_MALAYI_VS_M_TUBERCULOSIS_MAC_DN         |             |                                  |                                  |             |
| GSE360_HIGH_DOSE_B_MALAYI_VS_M_TUBERCULOSIS_MAC_DN         |             |                                  |                                  |             |
| 147                                                        | -0.384121   | -1.578668                        | 0                                | 0.009110952 |
| 0.991                                                      | 1194        | "tags=19%, list=8%, signal=21%"  |                                  |             |
| GSE41867_NAIVE_VS_DAY6_LCMV_EFFECTOR_CD8_TCELL_DN          |             |                                  |                                  |             |

GSE41867\_NAIVE\_VS\_DAY6\_LCMV\_EFFECTOR\_CD8\_TCELL\_DN  
142 -0.3829728 -1.5779043 0 0.00919175  
0.991 2315 "tags=35%, list=16%, signal=42%"  
GSE24634\_TREG\_VS\_TCONV\_POST\_DAY7\_IL4\_CONVERSION\_DN  
GSE24634\_TREG\_VS\_TCONV\_POST\_DAY7\_IL4\_CONVERSION\_DN  
152 -0.37667254 -1.5761434 0 0.009391294  
0.992 3217 "tags=36%, list=23%, signal=46%"  
GSE14308\_TH2\_VS\_NATURAL\_TREG\_DN GSE14308\_TH2\_VS\_NATURAL\_TREG\_DN  
143 -0.3813774 -1.575658 0.005607477  
0.009452529 0.992 1865 "tags=25%, list=13%, signal=29%"  
GSE3920\_IFNA\_VS\_IFNG\_TREATED\_FIBROBLAST\_UP  
GSE3920\_IFNA\_VS\_IFNG\_TREATED\_FIBROBLAST\_UP  
130 -0.389403 -1.5749099 0.001851852  
0.00954272 0.993 2130 "tags=28%, list=15%, signal=33%"  
GSE39022\_LN\_VS\_SPLEEN\_DC\_DN GSE39022\_LN\_VS\_SPLEEN\_DC\_DN  
128 -0.38862827 -1.5748267 0.003745318  
0.009531415 0.993 1089 "tags=20%, list=8%, signal=22%"  
GSE33425\_CD161\_HIGH\_VS\_INT\_CD8\_TCELL\_UP  
GSE33425\_CD161\_HIGH\_VS\_INT\_CD8\_TCELL\_UP  
158 -0.37713292 -1.574707 0 0.009522329  
0.993 2517 "tags=35%, list=18%, signal=42%"  
GSE21360\_PRIMARY\_VS\_QUATERNARY\_MEMORY\_CD8\_TCELL\_DN  
GSE21360\_PRIMARY\_VS\_QUATERNARY\_MEMORY\_CD8\_TCELL\_DN  
133 -0.38125676 -1.5740275 0 0.009601087  
0.993 1621 "tags=26%, list=11%, signal=29%"  
GSE18791\_CTRL\_VS\_NEWCASTLE\_VIRUS\_DC\_1H\_DN  
GSE18791\_CTRL\_VS\_NEWCASTLE\_VIRUS\_DC\_1H\_DN  
102 -0.40658554 -1.5740261 0.005859375  
0.009577264 0.993 2140 "tags=29%, list=15%, signal=34%"  
GSE21063\_CTRL\_VS\_ANTI\_IGM\_STIM\_BCELL\_8H\_UP  
GSE21063\_CTRL\_VS\_ANTI\_IGM\_STIM\_BCELL\_8H\_UP  
123 -0.3939288 -1.5734949 0 0.009649226  
0.993 3761 "tags=38%, list=27%, signal=52%"  
GSE40441\_NRP1\_POS\_INDUCED\_TREG\_VS\_NRP1\_NEG\_NATURAL\_TREG\_UP  
GSE40441\_NRP1\_POS\_INDUCED\_TREG\_VS\_NRP1\_NEG\_NATURAL\_TREG\_UP  
153 -0.3800746 -1.5731547 0 0.009666836  
0.994 2452 "tags=29%, list=17%, signal=34%"  
GSE37301\_MULTIPOTENT\_PROGENITOR\_VS\_PRO\_BCELL\_DN  
GSE37301\_MULTIPOTENT\_PROGENITOR\_VS\_PRO\_BCELL\_DN  
144 -0.3832089 -1.5711347 0 0.009920492  
0.996 1860 "tags=24%, list=13%, signal=28%"  
GSE16385\_ROSIGLITAZONE\_IFNG\_TNF\_VS\_IL4\_STIM\_MACROPHAGE\_DN  
GSE16385\_ROSIGLITAZONE\_IFNG\_TNF\_VS\_IL4\_STIM\_MACROPHAGE\_DN  
137 -0.38359874 -1.5708115 0 0.009933322  
0.996 1413 "tags=21%, list=10%, signal=23%"  
GSE3982\_BCELL\_VS\_TH2\_UP GSE3982\_BCELL\_VS\_TH2\_UP  
127 -0.38279164 -1.5706658 0.002053388  
0.009931757 0.996 2553 "tags=27%, list=18%, signal=32%"  
GSE9601\_UNTREATED\_VS\_NFKB\_INHIBITOR\_TREATED\_HCMV\_INF\_MONOCYTE\_DN  
GSE9601\_UNTREATED\_VS\_NFKB\_INHIBITOR\_TREATED\_HCMV\_INF\_MONOCYTE\_DN  
148 -0.37926155 -1.5694505 0  
0.010113304 0.997 2327 "tags=31%, list=16%, signal=37%"  
GSE43863\_DAY6\_EFF\_VS\_DAY150\_MEM\_LY6C\_INT\_CXCR5POS\_CD4\_TCELL\_UP  
GSE43863\_DAY6\_EFF\_VS\_DAY150\_MEM\_LY6C\_INT\_CXCR5POS\_CD4\_TCELL\_UP

|                                                                                    |      |                                  |            |                                   |             |
|------------------------------------------------------------------------------------|------|----------------------------------|------------|-----------------------------------|-------------|
| 0.010090707                                                                        | 148  | -0.375459                        | -1.569418  | 0                                 |             |
| GSE9509_LPS_VS_LPS_AND_IL10_STIM_IL10_KO_MACROPHAGE_20MIN_UP                       |      | 0.997                            | 2162       | "tags=28%, list=15%, signal=33%"  |             |
| GSE9509_LPS_VS_LPS_AND_IL10_STIM_IL10_KO_MACROPHAGE_20MIN_UP                       |      |                                  |            |                                   |             |
|                                                                                    | 133  | -0.38634774                      | -1.568417  | 0                                 |             |
| 0.010213438                                                                        |      | 0.997                            | 4123       | "tags=38%, list=29%, signal=54%"  |             |
| GSE30083_SP2_VS_SP4_THYMOCYTE_DN                                                   |      |                                  |            | GSE30083_SP2_VS_SP4_THYMOCYTE_DN  |             |
|                                                                                    | 147  | -0.37914845                      | -1.568044  | 0                                 |             |
| 0.010231699                                                                        |      | 0.997                            | 1345       | "tags=28%, list=10%, signal=31%"  |             |
| GSE33292_WT_VS_TCF1_KO_DN3_THYMOCYTE_UP                                            |      |                                  |            |                                   |             |
| GSE33292_WT_VS_TCF1_KO_DN3_THYMOCYTE_UP                                            |      |                                  |            |                                   |             |
|                                                                                    | 141  | -0.38339424                      | -1.5678911 | 0                                 | 0.010235659 |
| 0.997                                                                              | 1666 | "tags=23%, list=12%, signal=26%" |            |                                   |             |
| GSE43955_TGFB_IL6_VS_TGFB_IL6_IL23_TH17_ACT_CD4_TCELL_52H_DN                       |      |                                  |            |                                   |             |
| GSE43955_TGFB_IL6_VS_TGFB_IL6_IL23_TH17_ACT_CD4_TCELL_52H_DN                       |      |                                  |            |                                   |             |
|                                                                                    | 166  | -0.37320387                      | -1.5676335 | 0                                 |             |
| 0.010261814                                                                        |      | 0.997                            | 2193       | "tags=27%, list=16%, signal=32%"  |             |
| GSE17974_2H_VS_72H_UNTREATED_IN_VITRO_CD4_TCELL_UP                                 |      |                                  |            |                                   |             |
| GSE17974_2H_VS_72H_UNTREATED_IN_VITRO_CD4_TCELL_UP                                 |      |                                  |            |                                   |             |
|                                                                                    | 121  | -0.39326876                      | -1.5667521 | 0.004081633                       |             |
| 0.010395561                                                                        |      | 0.997                            | 1070       | "tags=21%, list=8%, signal=23%"   |             |
| GSE12845_IGD_NEG_BLOOD_VS_NAIVE_TONSIL_BCELL_DN                                    |      |                                  |            |                                   |             |
| GSE12845_IGD_NEG_BLOOD_VS_NAIVE_TONSIL_BCELL_DN                                    |      |                                  |            |                                   |             |
|                                                                                    | 129  | -0.38530824                      | -1.5665599 | 0.001824818                       |             |
| 0.010398964                                                                        |      | 0.998                            | 2810       | "tags=33%, list=20%, signal=40%"  |             |
| GSE15930_NAIVE_VS_72H_IN_VITRO_STIM_CD8_TCELL_UP                                   |      |                                  |            |                                   |             |
| GSE15930_NAIVE_VS_72H_IN_VITRO_STIM_CD8_TCELL_UP                                   |      |                                  |            |                                   |             |
|                                                                                    | 159  | -0.37415916                      | -1.5650027 | 0.002016129                       |             |
| 0.010643037                                                                        |      | 0.998                            | 3210       | "tags=35%, list=23%, signal=45%"  |             |
| GSE24634_NAIVE_CD4_TCELL_VS_DAY5_IL4_CONV_TREG_UP                                  |      |                                  |            |                                   |             |
| GSE24634_NAIVE_CD4_TCELL_VS_DAY5_IL4_CONV_TREG_UP                                  |      |                                  |            |                                   |             |
|                                                                                    | 128  | -0.38941243                      | -1.5629247 | 0.003738318                       |             |
| 0.010964051                                                                        |      | 0.998                            | 2038       | "tags=23%, list=14%, signal=27%"  |             |
| GSE3565_CTRL_VS_LPS_INJECTED_SPLENOCYTES_DN                                        |      |                                  |            |                                   |             |
| GSE3565_CTRL_VS_LPS_INJECTED_SPLENOCYTES_DN                                        |      |                                  |            |                                   |             |
|                                                                                    | 138  | -0.3776588                       | -1.5627165 | 0                                 | 0.010964064 |
| 0.998                                                                              | 1507 | "tags=27%, list=11%, signal=30%" |            |                                   |             |
| GSE28726_ACT_CD4_TCELL_VS_ACT_VA24NEG_NKTCELL_DN                                   |      |                                  |            |                                   |             |
| GSE28726_ACT_CD4_TCELL_VS_ACT_VA24NEG_NKTCELL_DN                                   |      |                                  |            |                                   |             |
|                                                                                    | 146  | -0.3731603                       | -1.5622858 | 0.003868472                       |             |
| 0.011006103                                                                        |      | 0.998                            | 1703       | "tags=26%, list=12%, signal=29%"  |             |
| GSE2124_CTRL_VS_LYMPHOTOXIN_BETA_TREATED_MLN_DN                                    |      |                                  |            |                                   |             |
| GSE2124_CTRL_VS_LYMPHOTOXIN_BETA_TREATED_MLN_DN                                    |      |                                  |            |                                   |             |
|                                                                                    | 144  | -0.37921768                      | -1.5616679 | 0                                 | 0.01106583  |
| 0.998                                                                              | 1898 | "tags=26%, list=13%, signal=30%" |            |                                   |             |
| GSE14415_NATURAL_TREG_VS_TCONV_UP                                                  |      |                                  |            | GSE14415_NATURAL_TREG_VS_TCONV_UP |             |
|                                                                                    | 118  | -0.391216                        | -1.561366  | 0.005607477                       |             |
| 0.011081518                                                                        |      | 0.998                            | 1852       | "tags=27%, list=13%, signal=31%"  |             |
| GSE9650_EXHAUSTED_VS_MEMORY_CD8_TCELL_UP                                           |      |                                  |            |                                   |             |
| GSE9650_EXHAUSTED_VS_MEMORY_CD8_TCELL_UP                                           |      |                                  |            |                                   |             |
|                                                                                    | 150  | -0.37265775                      | -1.5611756 | 0.001953125                       |             |
| 0.011088993                                                                        |      | 0.999                            | 1551       | "tags=24%, list=11%, signal=27%"  |             |
| GSE37534_UNTREATED_VS_PIOGLITAZONE_TREATED_CD4_TCELL_PPARG1_AND_FOXP3_TRASDUCED_DN |      |                                  |            |                                   |             |

GSE37534\_UNTREATED\_VS\_PIOGLITAZONE\_TREATED\_CD4\_TCELL\_PPARG1\_AND\_FOXP  
3\_TRASDUCED\_DN 154 -0.37062842 -1.5595386  
0.001915709 0.011313331 0.999 1138 "tags=21%,  
list=8%, signal=23%"  
GSE11864\_CSF1\_VS\_CSF1\_IFNG\_IN\_MAC\_UP  
GSE11864\_CSF1\_VS\_CSF1\_IFNG\_IN\_MAC\_UP  
129 -0.38420635 -1.5594331 0.00204918  
0.011304654 0.999 1441 "tags=22%, list=10%, signal=24%"  
GSE36078\_WT\_VS\_IL1R\_KO\_LUNG\_DC\_AFTER\_AD5\_T425A\_HEXON\_INF\_DN  
GSE36078\_WT\_VS\_IL1R\_KO\_LUNG\_DC\_AFTER\_AD5\_T425A\_HEXON\_INF\_DN  
147 -0.37662497 -1.5593892 0 0.011287887  
0.999 1282 "tags=20%, list=9%, signal=22%"  
GSE13306\_TREG\_VS\_TCONV\_UP GSE13306\_TREG\_VS\_TCONV\_UP  
150 -0.37699074 -1.5574917 0.008281574  
0.011592092 0.999 3394 "tags=34%, list=24%, signal=44%"  
GSE46606\_IRF4\_KO\_VS\_WT\_UNSTIM\_BCELL\_DN  
GSE46606\_IRF4\_KO\_VS\_WT\_UNSTIM\_BCELL\_DN  
147 -0.3785874 -1.5568209 0 0.011667149  
1 1978 "tags=26%, list=14%, signal=30%"  
GSE411\_UNSTIM\_VS\_100MIN\_IL6\_STIM\_MACROPHAGE\_DN  
GSE411\_UNSTIM\_VS\_100MIN\_IL6\_STIM\_MACROPHAGE\_DN  
146 -0.37131122 -1.5565313 0 0.011694912  
1 1174 "tags=18%, list=8%, signal=20%"  
GSE1460\_DP\_VS\_CD4\_THYMOCYTE\_DN GSE1460\_DP\_VS\_CD4\_THYMOCYTE\_DN  
145 -0.37388277 -1.5560324 0.003960396  
0.011757704 1 2000 "tags=25%, list=14%, signal=29%"  
GSE3565\_DUSP1\_VS\_WT\_SPLENOCYTES\_DN  
GSE3565\_DUSP1\_VS\_WT\_SPLENOCYTES\_DN  
147 -0.3753375 -1.5557033 0.001960784  
0.011792945 1 1229 "tags=24%, list=9%, signal=27%"  
GSE36888\_UNTREATED\_VS\_IL2\_TREATED\_TCELL\_17H\_DN  
GSE36888\_UNTREATED\_VS\_IL2\_TREATED\_TCELL\_17H\_DN  
132 -0.37979093 -1.5548837 0 0.011906049  
1 1534 "tags=24%, list=11%, signal=27%"  
GSE15659\_RESTING\_VS\_ACTIVATED\_TREG\_UP  
GSE15659\_RESTING\_VS\_ACTIVATED\_TREG\_UP  
102 -0.40075338 -1.55383 0.005703422 0.012059356  
1 2876 "tags=28%, list=20%, signal=35%"  
GSE31082\_CD4\_VS\_CD8\_SP\_THYMOCYTE\_UP  
GSE31082\_CD4\_VS\_CD8\_SP\_THYMOCYTE\_UP  
158 -0.3706068 -1.553788 0.001834862  
0.012035477 1 2694 "tags=32%, list=19%, signal=39%"  
GSE7460\_CTRL\_VS\_TGFB\_TREATED\_ACT\_TCONV\_DN  
GSE7460\_CTRL\_VS\_TGFB\_TREATED\_ACT\_TCONV\_DN  
147 -0.37358937 -1.5533413 0.001968504  
0.012096528 1 2410 "tags=31%, list=17%, signal=37%"  
GSE34515\_CD16\_POS\_MONOCYTE\_VS\_DC\_DN  
GSE34515\_CD16\_POS\_MONOCYTE\_VS\_DC\_DN  
142 -0.37307575 -1.5522475 0 0.012252037  
1 1597 "tags=25%, list=11%, signal=28%"  
GSE2770\_IL12\_ACT\_VS\_ACT\_CD4\_TCELL\_2H\_UP  
GSE2770\_IL12\_ACT\_VS\_ACT\_CD4\_TCELL\_2H\_UP  
123 -0.38340434 -1.5518851 0.003921569  
0.012297231 1 1663 "tags=25%, list=12%, signal=28%"

GSE39916\_B\_CELL\_SPLEEN\_VS\_PLASMA\_CELL\_BONE\_MARROW\_DN  
GSE39916\_B\_CELL\_SPLEEN\_VS\_PLASMA\_CELL\_BONE\_MARROW\_DN  
152 -0.37475324 -1.5515947 0.003642987  
0.012313554 1 1279 "tags=26%, list=9%, signal=28%"  
GSE39820\_IL1B\_IL6\_VS\_IL1B\_IL6\_IL23A\_TREATED\_CD4\_TCELL\_DN  
GSE39820\_IL1B\_IL6\_VS\_IL1B\_IL6\_IL23A\_TREATED\_CD4\_TCELL\_DN  
155 -0.36904684 -1.5513971 0.001960784  
0.012318108 1 1841 "tags=21%, list=13%, signal=24%"  
GSE14308\_TH17\_VS\_NATURAL\_TREG\_DN GSE14308\_TH17\_VS\_NATURAL\_TREG\_DN  
146 -0.37371016 -1.5490752 0.003968254  
0.012660816 1 2004 "tags=25%, list=14%, signal=28%"  
GSE6875\_TCONV\_VS\_FOXP3\_KO\_TREG\_DN GSE6875\_TCONV\_VS\_FOXP3\_KO\_TREG\_DN  
151 -0.3707084 -1.5483683 0.003968254  
0.012750438 1 2524 "tags=30%, list=18%, signal=37%"  
GSE26030\_UNSTIM\_VS\_RESTIM\_TH1\_DAY5\_POST\_POLARIZATION\_UP  
GSE26030\_UNSTIM\_VS\_RESTIM\_TH1\_DAY5\_POST\_POLARIZATION\_UP  
146 -0.3759942 -1.5479959 0.003738318  
0.012788188 1 2481 "tags=35%, list=18%, signal=42%"  
GSE7460\_TCONV\_VS\_TREG\_LN\_UP GSE7460\_TCONV\_VS\_TREG\_LN\_UP  
151 -0.37171885 -1.5478672 0  
0.012780373 1 1790 "tags=25%, list=13%, signal=29%"  
GSE21670\_TGFB\_VS\_IL6\_TREATED\_STAT3\_KO\_CD4\_TCELL\_DN  
GSE21670\_TGFB\_VS\_IL6\_TREATED\_STAT3\_KO\_CD4\_TCELL\_DN  
132 -0.38174292 -1.5472623 0.003738318  
0.012872488 1 2174 "tags=29%, list=15%, signal=34%"  
GSE33513\_TCF7\_KO\_VS\_HET\_EARLY\_THYMIC\_PROGENITOR\_UP  
GSE33513\_TCF7\_KO\_VS\_HET\_EARLY\_THYMIC\_PROGENITOR\_UP  
140 -0.3705536 -1.5461624 0 0.013053688  
1 2525 "tags=26%, list=18%, signal=32%"  
GSE11057\_NAIVE\_VS\_CENT\_MEMORY\_CD4\_TCELL\_UP  
GSE11057\_NAIVE\_VS\_CENT\_MEMORY\_CD4\_TCELL\_UP  
113 -0.38793334 -1.543202 0.005703422  
0.013585694 1 1604 "tags=21%, list=11%, signal=24%"  
GSE12392\_IFNAR\_KO\_VS\_IFNB\_KO\_CD8\_NEG\_SPLEEN\_DC\_UP  
GSE12392\_IFNAR\_KO\_VS\_IFNB\_KO\_CD8\_NEG\_SPLEEN\_DC\_UP  
140 -0.3714002 -1.5428867 0.001960784  
0.01361375 1 2538 "tags=31%, list=18%, signal=37%"  
GSE3920\_IFNA\_VS\_IFNG\_TREATED\_FIBROBLAST\_DN  
GSE3920\_IFNA\_VS\_IFNG\_TREATED\_FIBROBLAST\_DN  
149 -0.37206423 -1.5420909 0 0.013742727  
1 1435 "tags=25%, list=10%, signal=27%"  
GSE36476\_CTRL\_VS\_TSST\_ACT\_72H\_MEMORY\_CD4\_TCELL\_YOUNG\_UP  
GSE36476\_CTRL\_VS\_TSST\_ACT\_72H\_MEMORY\_CD4\_TCELL\_YOUNG\_UP  
137 -0.37433842 -1.5420091 0.001883239  
0.01372524 1 3215 "tags=38%, list=23%, signal=49%"  
GSE43863\_DAY6\_EFF\_VS\_DAY150\_MEM\_TH1\_CD4\_TCELL\_UP  
GSE43863\_DAY6\_EFF\_VS\_DAY150\_MEM\_TH1\_CD4\_TCELL\_UP  
164 -0.3715226 -1.5416261 0 0.013779253  
1 1962 "tags=28%, list=14%, signal=32%"  
GSE37532\_TREG\_VS\_TCONV\_PPARG\_KO\_CD4\_TCELL\_FROM\_VISCERAL\_ADIPOSE\_TISS  
UE\_DN  
GSE37532\_TREG\_VS\_TCONV\_PPARG\_KO\_CD4\_TCELL\_FROM\_VISCERAL\_ADIPOSE\_TISS  
UE\_DN  
143 -0.37622952 -1.5415205 0  
0.013774742 1 2261 "tags=29%, list=16%, signal=35%"



GSE18791\_CTRL\_VS\_NEWCASTLE\_VIRUS\_DC\_16H\_DN  
GSE18791\_CTRL\_VS\_NEWCASTLE\_VIRUS\_DC\_16H\_DN  
124 -0.3859528 -1.5401498 0.001937985  
0.013994218 1 2433 "tags=32%, list=17%, signal=39%"  
GSE26669\_CTRL\_VS\_COSTIM\_BLOCK\_MLR\_CD8\_TCELL\_DN  
GSE26669\_CTRL\_VS\_COSTIM\_BLOCK\_MLR\_CD8\_TCELL\_DN  
144 -0.3757066 -1.5394946 0.001964637  
0.014063743 1 2193 "tags=30%, list=16%, signal=35%"  
GSE23568\_CTRL\_VS\_ID3\_TRANSDUCED\_CD8\_TCELL\_UP  
GSE23568\_CTRL\_VS\_ID3\_TRANSDUCED\_CD8\_TCELL\_UP  
155 -0.37122428 -1.5394722 0 0.014036471  
1 1729 "tags=27%, list=12%, signal=31%"  
GSE32423\_MEMORY\_VS\_NAIVE\_CD8\_TCELL\_DN  
GSE32423\_MEMORY\_VS\_NAIVE\_CD8\_TCELL\_DN  
145 -0.37254113 -1.5391439 0 0.014068268  
1 2159 "tags=27%, list=15%, signal=31%"  
GSE33424\_CD161\_INT\_VS\_NEG\_CD8\_TCELL\_UP  
GSE33424\_CD161\_INT\_VS\_NEG\_CD8\_TCELL\_UP  
141 -0.37332758 -1.5378532 0 0.014310532  
1 1487 "tags=27%, list=11%, signal=30%"  
GSE14000\_UNSTIM\_VS\_4H\_LPS\_DC\_DN GSE14000\_UNSTIM\_VS\_4H\_LPS\_DC\_DN  
135 -0.373428 -1.5376171 0.001855288  
0.014334561 1 2409 "tags=33%, list=17%, signal=40%"  
GSE10273\_HIGH\_VS\_LOW\_IL7\_TREATED\_IRF4\_8\_NULL\_PRE\_BCELL\_UP  
GSE10273\_HIGH\_VS\_LOW\_IL7\_TREATED\_IRF4\_8\_NULL\_PRE\_BCELL\_UP  
133 -0.37508094 -1.537358 0.003875969  
0.014336224 1 1473 "tags=23%, list=10%, signal=26%"  
GSE21670\_UNTREATED\_VS\_IL6\_TREATED\_CD4\_TCELL\_DN  
GSE21670\_UNTREATED\_VS\_IL6\_TREATED\_CD4\_TCELL\_DN  
144 -0.37373534 -1.5372033 0.003831418  
0.014330746 1 2123 "tags=31%, list=15%, signal=36%"  
GSE3982\_BASOPHIL\_VS\_EFF\_MEMORY\_CD4\_TCELL\_UP  
GSE3982\_BASOPHIL\_VS\_EFF\_MEMORY\_CD4\_TCELL\_UP  
154 -0.37476215 -1.536357 0 0.014468149  
1 1922 "tags=28%, list=14%, signal=32%"  
GSE29949\_MICROGLIA\_BRAIN\_VS\_CD8\_POS\_DC\_SPLEEN\_UP  
GSE29949\_MICROGLIA\_BRAIN\_VS\_CD8\_POS\_DC\_SPLEEN\_UP  
146 -0.37522098 -1.5348407 0.001886793  
0.014753754 1 791 "tags=18%, list=6%, signal=19%"  
GSE26156\_DOUBLE\_POSITIVE\_VS\_CD4\_SINGLE\_POSITIVE\_THYMOCYTE\_UP  
GSE26156\_DOUBLE\_POSITIVE\_VS\_CD4\_SINGLE\_POSITIVE\_THYMOCYTE\_UP  
138 -0.38006675 -1.5330132 0.003868472  
0.0150971 1 1851 "tags=27%, list=13%, signal=31%"  
GSE11961\_MARGINAL\_ZONE\_BCELL\_VS\_PLASMA\_CELL\_DAY7\_UP  
GSE11961\_MARGINAL\_ZONE\_BCELL\_VS\_PLASMA\_CELL\_DAY7\_UP  
142 -0.3753825 -1.5320857 0.001964637  
0.015228242 1 1983 "tags=27%, list=14%, signal=31%"  
GSE7460\_CTRL\_VS\_TGFB\_TREATED\_ACT\_FOXP3\_MUT\_TCONV\_DN  
GSE7460\_CTRL\_VS\_TGFB\_TREATED\_ACT\_FOXP3\_MUT\_TCONV\_DN  
145 -0.37357217 -1.5316029 0 0.015293329  
1 890 "tags=16%, list=6%, signal=17%"  
GSE15659\_NAIVE\_CD4\_TCELL\_VS\_NONSUPPRESSIVE\_TCELL\_UP  
GSE15659\_NAIVE\_CD4\_TCELL\_VS\_NONSUPPRESSIVE\_TCELL\_UP  
107 -0.3907602 -1.5314478 0.003717472

0.015287688 1 1826 "tags=22%, list=13%, signal=26%"  
GSE12003\_MIR223\_KO\_VS\_WT\_BM\_PROGENITOR\_8D\_CULTURE\_UP  
GSE12003\_MIR223\_KO\_VS\_WT\_BM\_PROGENITOR\_8D\_CULTURE\_UP  
92 -0.399274 -1.5306332 0.009433962  
0.015433541 1 1506 "tags=20%, list=11%, signal=22%"  
GSE29614\_CTRL\_VS\_TIV\_FLU\_VACCINE\_PBMC\_2007\_UP  
GSE29614\_CTRL\_VS\_TIV\_FLU\_VACCINE\_PBMC\_2007\_UP  
94 -0.39685437 -1.5296669 0.003861004  
0.01557901 1 5030 "tags=40%, list=36%, signal=62%"  
GSE22886\_IL2\_VS\_IL15\_STIM\_NKCELL\_UP  
GSE22886\_IL2\_VS\_IL15\_STIM\_NKCELL\_UP  
137 -0.37364414 -1.5290498 0.001811594  
0.015687708 1 4087 "tags=36%, list=29%, signal=51%"  
GSE25123\_WT\_VS\_PPARG\_KO\_MACROPHAGE\_IL4\_STIM\_DN  
GSE25123\_WT\_VS\_PPARG\_KO\_MACROPHAGE\_IL4\_STIM\_DN  
158 -0.3635413 -1.5270051 0.003921569  
0.016145546 1 1498 "tags=25%, list=11%, signal=28%"  
GSE14308\_TH17\_VS\_NAIVE\_CD4\_TCELL\_DN  
GSE14308\_TH17\_VS\_NAIVE\_CD4\_TCELL\_DN  
145 -0.36853176 -1.5266541 0.003868472  
0.01620421 1 1305 "tags=19%, list=9%, signal=20%"  
GSE42021\_TREG\_PLN\_VS\_CD24INT\_TREG\_THYMUS\_UP  
GSE42021\_TREG\_PLN\_VS\_CD24INT\_TREG\_THYMUS\_UP  
166 -0.36246103 -1.5263904 0 0.01621985  
1 1864 "tags=25%, list=13%, signal=28%"  
GSE3920\_UNTREATED\_VS\_IFNA\_TREATED\_FIBROBLAST\_DN  
GSE3920\_UNTREATED\_VS\_IFNA\_TREATED\_FIBROBLAST\_DN  
139 -0.37284708 -1.526146 0.001769912  
0.016242694 1 2395 "tags=36%, list=17%, signal=43%"  
GSE21379\_WT\_VS\_SAP\_KO\_TFH\_CD4\_TCELL\_DN  
GSE21379\_WT\_VS\_SAP\_KO\_TFH\_CD4\_TCELL\_DN  
130 -0.37805614 -1.525722 0.007246377  
0.016297333 1 1394 "tags=22%, list=10%, signal=24%"  
GSE9601\_NFKB\_INHIBITOR\_VS\_PI3K\_INHIBITOR\_TREATED\_HCMV\_INF\_MONOCYTE\_D  
N  
GSE9601\_NFKB\_INHIBITOR\_VS\_PI3K\_INHIBITOR\_TREATED\_HCMV\_INF\_MONOCYTE\_D  
N  
164 -0.3611752 -1.5250634  
0.001862197 0.016413728 1 2649 "tags=32%,  
list=19%, signal=39%"  
GSE411\_WT\_VS\_SOCS3\_KO\_MACROPHAGE\_IL6\_STIM\_400MIN\_UP  
GSE411\_WT\_VS\_SOCS3\_KO\_MACROPHAGE\_IL6\_STIM\_400MIN\_UP  
147 -0.36771086 -1.5247216 0.003780718  
0.016443007 1 2178 "tags=33%, list=15%, signal=38%"  
GSE13738\_RESTING\_VS\_TCR\_ACTIVATED\_CD4\_TCELL\_UP  
GSE13738\_RESTING\_VS\_TCR\_ACTIVATED\_CD4\_TCELL\_UP  
105 -0.38600603 -1.5235456 0.009328358  
0.016647317 1 1796 "tags=24%, list=13%, signal=27%"  
GSE40274\_CTRL\_VS\_FOXP3\_AND\_HELIO3\_TRANSNUCED\_ACTIVATED\_CD4\_TCELL\_UP  
GSE40274\_CTRL\_VS\_FOXP3\_AND\_HELIO3\_TRANSNUCED\_ACTIVATED\_CD4\_TCELL\_UP  
140 -0.36952636 -1.5231675 0.009823183  
0.01668325 1 1516 "tags=26%, list=11%, signal=29%"  
GSE32533\_WT\_VS\_MIR17\_KO\_ACT\_CD4\_TCELL\_UP  
GSE32533\_WT\_VS\_MIR17\_KO\_ACT\_CD4\_TCELL\_UP  
143 -0.37119168 -1.5213677 0.001890359

0.017038055 1 3819 "tags=38%, list=27%, signal=52%"  
GSE22025\_PROGESTERONE\_VS\_TGFB1\_AND\_PROGESTERONE\_TREATED\_CD4\_TCELL\_UP  
  
GSE22025\_PROGESTERONE\_VS\_TGFB1\_AND\_PROGESTERONE\_TREATED\_CD4\_TCELL\_UP  
136 -0.36904004 -1.51937 0.005576208  
0.017478965 1 2199 "tags=30%, list=16%, signal=35%"  
GSE24972\_MARGINAL\_ZONE\_BCELL\_VS\_FOLLICULAR\_BCELL\_IRF8\_KO\_DN  
GSE24972\_MARGINAL\_ZONE\_BCELL\_VS\_FOLLICULAR\_BCELL\_IRF8\_KO\_DN  
127 -0.37519255 -1.5193173 0.001923077  
0.017451322 1 2263 "tags=24%, list=16%, signal=29%"  
GSE29618\_BCELL\_VS\_PDC\_DAY7\_FLU\_VACCINE\_UP  
GSE29618\_BCELL\_VS\_PDC\_DAY7\_FLU\_VACCINE\_UP  
130 -0.37281516 -1.5190499 0.005597015  
0.017479705 1 2352 "tags=32%, list=17%, signal=38%"  
GSE18791\_CTRL\_VS\_NEWCASTLE\_VIRUS\_DC\_12H\_DN  
GSE18791\_CTRL\_VS\_NEWCASTLE\_VIRUS\_DC\_12H\_DN  
119 -0.3811071 -1.5180405 0.001912046  
0.017665239 1 1766 "tags=30%, list=13%, signal=34%"  
GSE6674\_ANTI\_IGM\_VS\_CPG\_STIM\_BCELL\_DN  
GSE6674\_ANTI\_IGM\_VS\_CPG\_STIM\_BCELL\_DN  
142 -0.3655789 -1.5175864 0.005802708  
0.017734513 1 2654 "tags=35%, list=19%, signal=42%"  
GSE22886\_NAIVE\_CD4\_TCELL\_VS\_48H\_ACT\_TH1\_UP  
GSE22886\_NAIVE\_CD4\_TCELL\_VS\_48H\_ACT\_TH1\_UP  
123 -0.37457746 -1.517539 0.008896797  
0.017704742 1 1519 "tags=21%, list=11%, signal=23%"  
GSE37534\_UNTREATED\_VS\_ROSIGLITAZONE\_TREATED\_CD4\_TCELL\_PPARG1\_AND\_FOX  
P3\_TRASDUCED\_DN  
GSE37534\_UNTREATED\_VS\_ROSIGLITAZONE\_TREATED\_CD4\_TCELL\_PPARG1\_AND\_FOX  
P3\_TRASDUCED\_DN 141 -0.3712036 -1.5174737  
0.005639098 0.017680367 1 1108 "tags=19%,  
list=8%, signal=21%"  
GSE7852\_TREG\_VS\_TCONV\_FAT\_UP GSE7852\_TREG\_VS\_TCONV\_FAT\_UP  
153 -0.364358 -1.5165142 0.001886793  
0.017891651 1 1830 "tags=25%, list=13%, signal=28%"  
GSE30962\_PRIMARY\_VS\_SECONDARY\_CHRONIC\_LCMV\_INF\_CD8\_TCELL\_DN  
GSE30962\_PRIMARY\_VS\_SECONDARY\_CHRONIC\_LCMV\_INF\_CD8\_TCELL\_DN  
146 -0.36700144 -1.5154579 0 0.018093174  
1 1038 "tags=20%, list=7%, signal=21%"  
GSE11961\_GERMINAL\_CENTER\_BCELL\_DAY7\_VS\_MEMORY\_BCELL\_DAY40\_DN  
GSE11961\_GERMINAL\_CENTER\_BCELL\_DAY7\_VS\_MEMORY\_BCELL\_DAY40\_DN  
144 -0.370135 -1.5151734 0.007920792  
0.018123206 1 1998 "tags=24%, list=14%, signal=28%"  
GSE32986\_GMCSF\_VS\_GMCSF\_AND\_CURDLAN\_HIGHDOSE\_STIM\_DC\_UP  
GSE32986\_GMCSF\_VS\_GMCSF\_AND\_CURDLAN\_HIGHDOSE\_STIM\_DC\_UP  
149 -0.37023675 -1.5148554 0.004024145  
0.018168868 1 1196 "tags=20%, list=8%, signal=22%"  
GSE21774\_CD62L\_POS\_CD56\_DIM\_VS\_CD62L\_NEG\_CD56\_DIM\_NK\_CELL\_UP  
GSE21774\_CD62L\_POS\_CD56\_DIM\_VS\_CD62L\_NEG\_CD56\_DIM\_NK\_CELL\_UP  
155 -0.3597564 -1.5132734 0.001869159  
0.0185067 1 2095 "tags=28%, list=15%, signal=33%"  
GSE4590\_PRE\_BCELL\_VS\_VPREB\_POS\_LARGE\_PRE\_BCELL\_DN  
GSE4590\_PRE\_BCELL\_VS\_VPREB\_POS\_LARGE\_PRE\_BCELL\_DN  
116 -0.3841882 -1.5132581 0.005660377

0.018472442 1 2664 "tags=35%, list=19%, signal=43%"  
GSE26928\_NAIVE\_VS\_CENT\_MEMORY\_CD4\_TCELL\_UP  
GSE26928\_NAIVE\_VS\_CENT\_MEMORY\_CD4\_TCELL\_UP  
110 -0.38489863 -1.513071 0.005825243  
0.018472485 1 2398 "tags=27%, list=17%, signal=33%"  
GSE32986\_UNSTIM\_VS\_GMCSF\_STIM\_DC\_UP  
GSE32986\_UNSTIM\_VS\_GMCSF\_STIM\_DC\_UP  
107 -0.37879616 -1.5126462 0.003846154  
0.01856103 1 1509 "tags=21%, list=11%, signal=23%"  
GSE557\_CIIITA\_KO\_VS\_I\_AB\_KO\_DC\_UP GSE557\_CIIITA\_KO\_VS\_I\_AB\_KO\_DC\_UP  
136 -0.3672955 -1.5120337 0.005791506  
0.018693807 1 2584 "tags=33%, list=18%, signal=40%"  
GSE37301\_HEMATOPOIETIC\_STEM\_CELL\_VS\_RAG2\_KO\_NK\_CELL\_UP  
GSE37301\_HEMATOPOIETIC\_STEM\_CELL\_VS\_RAG2\_KO\_NK\_CELL\_UP  
130 -0.37260413 -1.5104588 0.009881423  
0.019041367 1 2006 "tags=30%, list=14%, signal=35%"  
GSE40274\_FOXP3\_VS\_FOXP3\_AND\_XBP1\_TRANSDUCECD\_ACTIVATED\_CD4\_TCELL\_DN  
GSE40274\_FOXP3\_VS\_FOXP3\_AND\_XBP1\_TRANSDUCECD\_ACTIVATED\_CD4\_TCELL\_DN  
113 -0.37581694 -1.5103732 0.005628518  
0.019023368 1 1139 "tags=23%, list=8%, signal=25%"  
GSE16450\_CTRL\_VS\_IFNA\_6H\_STIM\_MATURE\_NEURON\_CELL\_LINE\_UP  
GSE16450\_CTRL\_VS\_IFNA\_6H\_STIM\_MATURE\_NEURON\_CELL\_LINE\_UP  
139 -0.36727422 -1.5102942 0.001855288  
0.019010516 1 2053 "tags=27%, list=15%, signal=31%"  
GSE22886\_UNSTIM\_VS\_IL15\_STIM\_NKCELL\_UP  
GSE22886\_UNSTIM\_VS\_IL15\_STIM\_NKCELL\_UP  
128 -0.37532687 -1.5092032 0.006085193  
0.019251488 1 4049 "tags=36%, list=29%, signal=50%"  
GSE28737\_BCL6\_HET\_VS\_BCL6\_KO\_MARGINAL\_ZONE\_BCELL\_UP  
GSE28737\_BCL6\_HET\_VS\_BCL6\_KO\_MARGINAL\_ZONE\_BCELL\_UP  
138 -0.36466327 -1.5087384 0.003663004  
0.019336183 1 2663 "tags=23%, list=19%, signal=28%"  
GSE3720\_VD1\_VS\_VD2\_GAMMADELTA\_TCELL\_WITH\_PMA\_STIM\_DN  
GSE3720\_VD1\_VS\_VD2\_GAMMADELTA\_TCELL\_WITH\_PMA\_STIM\_DN  
147 -0.36413127 -1.5038754 0.009578544  
0.02054777 1 2494 "tags=31%, list=18%, signal=38%"  
GSE7460\_CTRL\_VS\_FOXP3\_OVEREXPR\_TCONV\_DN  
GSE7460\_CTRL\_VS\_FOXP3\_OVEREXPR\_TCONV\_DN  
136 -0.3695049 -1.5037607 0.001828154  
0.02054387 1 1746 "tags=24%, list=12%, signal=27%"  
GSE36392\_MAC\_VS\_NEUTROPHIL\_IL25\_TREATED\_LUNG\_UP  
GSE36392\_MAC\_VS\_NEUTROPHIL\_IL25\_TREATED\_LUNG\_UP  
127 -0.37187994 -1.5030686 0.003976143  
0.02069585 1 1506 "tags=24%, list=11%, signal=26%"  
GSE24574\_BCL6\_HIGH\_TFH\_VS\_TFH\_CD4\_TCELL\_DN  
GSE24574\_BCL6\_HIGH\_TFH\_VS\_TFH\_CD4\_TCELL\_DN  
139 -0.36362368 -1.5030416 0.003642987  
0.020662997 1 1784 "tags=26%, list=13%, signal=29%"  
GSE2706\_R848\_VS\_LPS\_2H\_STIM\_DC\_UP GSE2706\_R848\_VS\_LPS\_2H\_STIM\_DC\_UP  
98 -0.38970792 -1.5026691 0.00996016  
0.0207255 1 1979 "tags=22%, list=14%, signal=26%"  
GSE15733\_BM\_VS\_SPLEEN\_MEMORY\_CD4\_TCELL\_DN  
GSE15733\_BM\_VS\_SPLEEN\_MEMORY\_CD4\_TCELL\_DN  
141 -0.36668637 -1.5018934 0.009615385

0.020884395 1 2397 "tags=32%, list=17%, signal=38%"  
GSE32034\_UNTREATED\_VS\_ROSIGLIZATONE\_TREATED\_LY6C\_LOW\_MONOCYTE\_UP  
GSE32034\_UNTREATED\_VS\_ROSIGLIZATONE\_TREATED\_LY6C\_LOW\_MONOCYTE\_UP  
97 -0.38927907 -1.5013443 0.008  
0.020975912 1 2307 "tags=22%, list=16%, signal=26%"  
GSE45365\_WT\_VS\_IFNAR\_KO\_CD11B\_DC\_UP  
GSE45365\_WT\_VS\_IFNAR\_KO\_CD11B\_DC\_UP  
118 -0.3785824 -1.501174 0.007662835  
0.02098594 1 3127 "tags=34%, list=22%, signal=43%"  
GSE2770\_IL12\_AND\_TGFB\_ACT\_VS\_ACT\_CD4\_TCELL\_6H\_UP  
GSE2770\_IL12\_AND\_TGFB\_ACT\_VS\_ACT\_CD4\_TCELL\_6H\_UP  
127 -0.3647545 -1.4991646 0.011428571  
0.021526469 1 1566 "tags=23%, list=11%, signal=25%"  
GSE30971\_WBP7\_HET\_VS\_KO\_MACROPHAGE\_2H\_LPS\_STIM\_DN  
GSE30971\_WBP7\_HET\_VS\_KO\_MACROPHAGE\_2H\_LPS\_STIM\_DN  
148 -0.36410996 -1.4984576 0.003816794  
0.021689579 1 1428 "tags=19%, list=10%, signal=21%"  
GSE15930\_NAIVE\_VS\_72H\_IN\_VITRO\_STIM\_IL12\_CD8\_TCELL\_UP  
GSE15930\_NAIVE\_VS\_72H\_IN\_VITRO\_STIM\_IL12\_CD8\_TCELL\_UP  
154 -0.36178815 -1.4980485 0.005649718  
0.021765778 1 2880 "tags=31%, list=20%, signal=38%"  
GSE37605\_C57BL6\_VS\_NOD\_FOXP3\_IRES\_GFP\_TCONV\_UP  
GSE37605\_C57BL6\_VS\_NOD\_FOXP3\_IRES\_GFP\_TCONV\_UP  
116 -0.37768224 -1.4975294 0 0.021879816  
1 2720 "tags=26%, list=19%, signal=32%"  
GSE11961\_FOLLICULAR\_BCELL\_VS\_GERMINAL\_CENTER\_BCELL\_DAY40\_UP  
GSE11961\_FOLLICULAR\_BCELL\_VS\_GERMINAL\_CENTER\_BCELL\_DAY40\_UP  
151 -0.36406106 -1.4974225 0.003780718  
0.021868287 1 2423 "tags=31%, list=17%, signal=37%"  
GSE18791\_CTRL\_VS\_NEWCASTLE\_VIRUS\_DC\_6H\_DN  
GSE18791\_CTRL\_VS\_NEWCASTLE\_VIRUS\_DC\_6H\_DN  
134 -0.36752978 -1.4973265 0.005524862  
0.02185338 1 1766 "tags=27%, list=13%, signal=30%"  
GSE5542\_UNTREATED\_VS\_IFNA\_TREATED\_EPITHELIAL\_CELLS\_24H\_DN  
GSE5542\_UNTREATED\_VS\_IFNA\_TREATED\_EPITHELIAL\_CELLS\_24H\_DN  
117 -0.37506157 -1.4969196 0 0.021931684  
1 1409 "tags=21%, list=10%, signal=24%"  
GSE11057\_EFF\_MEM\_VS\_CENT\_MEM\_CD4\_TCELL\_DN  
GSE11057\_EFF\_MEM\_VS\_CENT\_MEM\_CD4\_TCELL\_DN  
113 -0.37705088 -1.4967785 0.011976048  
0.021916803 1 1557 "tags=27%, list=11%, signal=31%"  
GSE40493\_BCL6\_KO\_VS\_WT\_TREG\_DN GSE40493\_BCL6\_KO\_VS\_WT\_TREG\_DN  
77 -0.39989245 -1.4955338 0.011173184  
0.022262696 1 4496 "tags=42%, list=32%, signal=61%"  
GSE22886\_NAIVE\_TCELL\_VS\_MONOCYTE\_UP  
GSE22886\_NAIVE\_TCELL\_VS\_MONOCYTE\_UP  
142 -0.35974187 -1.4952843 0.010889292  
0.022301024 1 1236 "tags=20%, list=9%, signal=21%"  
GSE369\_PRE\_VS\_POST\_IL6\_INJECTION\_IFNG\_KO\_LIVER\_DN  
GSE369\_PRE\_VS\_POST\_IL6\_INJECTION\_IFNG\_KO\_LIVER\_DN  
143 -0.36456856 -1.4946275 0.003929273  
0.022434527 1 2381 "tags=32%, list=17%, signal=38%"  
GSE21670\_STAT3\_KO\_VS\_WT\_CD4\_TCELL\_TGFB\_IL6\_TREATED\_DN  
GSE21670\_STAT3\_KO\_VS\_WT\_CD4\_TCELL\_TGFB\_IL6\_TREATED\_DN

150 -0.36227483 -1.4941268 0.003824092  
0.0225533 1 1840 "tags=25%, list=13%, signal=29%"  
GSE13306\_TREG\_VS\_TCONV\_LAMINA\_PROPRIA\_UP  
GSE13306\_TREG\_VS\_TCONV\_LAMINA\_PROPRIA\_UP  
152 -0.36306536 -1.4932859 0.001930502  
0.022746151 1 2619 "tags=32%, list=19%, signal=38%"  
GSE34156\_NOD2\_LIGAND\_VS\_NOD2\_AND\_TLR1\_TLR2\_LIGAND\_24H\_TREATED\_MONOCY  
TE\_DN  
GSE34156\_NOD2\_LIGAND\_VS\_NOD2\_AND\_TLR1\_TLR2\_LIGAND\_24H\_TREATED\_MONOCY  
TE\_DN 99 -0.38165697 -1.4928035  
0.007476636 0.02286416 1 1376 "tags=21%,  
list=10%, signal=23%"  
GSE14350\_IL2RB\_KO\_VS\_WT\_TREG\_DN GSE14350\_IL2RB\_KO\_VS\_WT\_TREG\_DN  
143 -0.36285883 -1.4921446 0  
0.023028769 1 1962 "tags=26%, list=14%, signal=30%"  
GSE24671\_CTRL\_VS\_SENDAI\_VIRUS\_INFECTED\_MOUSE\_SPLENOCYTES\_UP  
GSE24671\_CTRL\_VS\_SENDAI\_VIRUS\_INFECTED\_MOUSE\_SPLENOCYTES\_UP  
126 -0.36812678 -1.491143 0.009940358  
0.023273755 1 1362 "tags=21%, list=10%, signal=24%"  
GSE25677\_MPL\_VS\_R848\_STIM\_BCELL\_UP  
GSE25677\_MPL\_VS\_R848\_STIM\_BCELL\_UP  
147 -0.363101 -1.4909011 0.001949318  
0.02329682 1 1702 "tags=24%, list=12%, signal=28%"  
GSE15930\_NAIVE\_VS\_24H\_IN\_VITRO\_STIM\_IL12\_CD8\_TCELL\_UP  
GSE15930\_NAIVE\_VS\_24H\_IN\_VITRO\_STIM\_IL12\_CD8\_TCELL\_UP  
156 -0.35393035 -1.4905528 0.001841621  
0.023364244 1 1462 "tags=21%, list=10%, signal=23%"  
GSE13738\_TCR\_VS\_BYSTANDER\_ACTIVATED\_CD4\_TCELL\_UP  
GSE13738\_TCR\_VS\_BYSTANDER\_ACTIVATED\_CD4\_TCELL\_UP  
135 -0.36289656 -1.4883354 0.007736944  
0.024018528 1 1463 "tags=21%, list=10%, signal=24%"  
GSE23505\_UNTREATED\_VS\_4DAY\_IL6\_IL1\_TREATED\_CD4\_TCELL\_DN  
GSE23505\_UNTREATED\_VS\_4DAY\_IL6\_IL1\_TREATED\_CD4\_TCELL\_DN  
154 -0.35585704 -1.487304 0.005617978  
0.024298344 1 2433 "tags=22%, list=17%, signal=26%"  
GSE3982\_MAST\_CELL\_VS\_TH2\_UP GSE3982\_MAST\_CELL\_VS\_TH2\_UP  
145 -0.36104715 -1.4872203 0.003853565  
0.024284111 1 2242 "tags=26%, list=16%, signal=30%"  
GSE1112\_HY\_CD8AB\_VS\_HY\_CD8AA\_THYMOCYTE\_RTOC\_CULTURE\_DN  
GSE1112\_HY\_CD8AB\_VS\_HY\_CD8AA\_THYMOCYTE\_RTOC\_CULTURE\_DN  
129 -0.36524975 -1.4872161 0 0.02424138  
1 1881 "tags=26%, list=13%, signal=29%"  
GSE1460\_DP\_THYMOCYTE\_VS\_NAIVE\_CD4\_TCELL\_ADULT\_BLOOD\_DN  
GSE1460\_DP\_THYMOCYTE\_VS\_NAIVE\_CD4\_TCELL\_ADULT\_BLOOD\_DN  
137 -0.36388308 -1.4866486 0 0.02437649  
1 1681 "tags=24%, list=12%, signal=27%"  
GSE41176\_UNSTIM\_VS\_ANTI\_IGM\_STIM\_BCELL\_3H\_UP  
GSE41176\_UNSTIM\_VS\_ANTI\_IGM\_STIM\_BCELL\_3H\_UP  
147 -0.35940894 -1.485948 0.001930502  
0.02455374 1 2654 "tags=31%, list=19%, signal=37%"  
GSE36888\_STAT5\_AB\_KNOCKIN\_VS\_WT\_TCELL\_IL2\_TREATED\_17H\_UP  
GSE36888\_STAT5\_AB\_KNOCKIN\_VS\_WT\_TCELL\_IL2\_TREATED\_17H\_UP  
157 -0.35972375 -1.4848571 0.005484461  
0.02484616 1 1371 "tags=22%, list=10%, signal=24%"

GSE8835\_CD4\_VS\_CD8\_TCELL\_CLL\_PATIENT\_DN  
GSE8835\_CD4\_VS\_CD8\_TCELL\_CLL\_PATIENT\_DN  
149 -0.36345094 -1.4842242 0.003868472  
0.025011124 1 2344 "tags=32%, list=17%, signal=38%"  
GSE24142\_DN2\_VS\_DN3\_THYMOCYTE\_FETAL\_DN  
GSE24142\_DN2\_VS\_DN3\_THYMOCYTE\_FETAL\_DN  
162 -0.3563903 -1.4842122 0.010989011  
0.024967432 1 1996 "tags=27%, list=14%, signal=31%"  
GSE32986\_GMCSF\_AND\_CURDLAN\_LOWDOSE\_VS\_GMCSF\_AND\_CURDLAN\_HIGHDOSE\_STI  
M\_DC\_DN  
GSE32986\_GMCSF\_AND\_CURDLAN\_LOWDOSE\_VS\_GMCSF\_AND\_CURDLAN\_HIGHDOSE\_STI  
M\_DC\_DN  
118 -0.3764554 -1.4840193  
0.013011153 0.024971196 1 2089 "tags=23%,  
list=15%, signal=27%"  
GSE23505\_UNTREATED\_VS\_4DAY\_IL6\_IL1\_IL23\_TREATED\_CD4\_TCELL\_UP  
GSE23505\_UNTREATED\_VS\_4DAY\_IL6\_IL1\_IL23\_TREATED\_CD4\_TCELL\_UP  
136 -0.36427218 -1.4823498 0.003780718  
0.0254641 3804 "tags=43%, list=27%, signal=58%"  
GSE16385\_IFNG\_TNF\_VS\_UNSTIM\_MACROPHAGE\_ROSIGLITAZONE\_TREATED\_DN  
GSE16385\_IFNG\_TNF\_VS\_UNSTIM\_MACROPHAGE\_ROSIGLITAZONE\_TREATED\_DN  
157 -0.35791266 -1.4822235 0.003937008  
0.02545575 1 2078 "tags=27%, list=15%, signal=31%"  
GSE30083\_SP1\_VS\_SP3\_THYMOCYTE\_DN GSE30083\_SP1\_VS\_SP3\_THYMOCYTE\_DN  
134 -0.36318672 -1.4819132 0.014  
0.025505606 1 1780 "tags=27%, list=13%, signal=30%"  
GSE9988\_ANTI\_TREM1\_VS\_CTRL\_TREATED\_MONOCYTES\_UP  
GSE9988\_ANTI\_TREM1\_VS\_CTRL\_TREATED\_MONOCYTES\_UP  
148 -0.36064413 -1.4811655 0.003710575  
0.025656462 1 1926 "tags=26%, list=14%, signal=30%"  
GSE43863\_TH1\_VS\_TFH\_EFFECTOR\_CD4\_TCELL\_DN  
GSE43863\_TH1\_VS\_TFH\_EFFECTOR\_CD4\_TCELL\_DN  
132 -0.36026138 -1.4810024 0.001848429  
0.025654135 1 2340 "tags=33%, list=17%, signal=39%"  
GSE12392\_WT\_VS\_IFNB\_KO\_CD8A\_NEG\_SPLEEN\_DC\_DN  
GSE12392\_WT\_VS\_IFNB\_KO\_CD8A\_NEG\_SPLEEN\_DC\_DN  
147 -0.35843778 -1.479397 0.005791506  
0.026140004 1 1928 "tags=27%, list=14%, signal=31%"  
GSE7764\_NKCELL\_VS\_SPLENOCYTE\_UP GSE7764\_NKCELL\_VS\_SPLENOCYTE\_UP  
145 -0.36274195 -1.4778345 0.006097561  
0.02658226 1 1362 "tags=24%, list=10%, signal=26%"  
GSE36888\_UNTREATED\_VS\_IL2\_TREATED\_STAT5\_AB\_KNOCKIN\_TCELL\_6H\_UP  
GSE36888\_UNTREATED\_VS\_IL2\_TREATED\_STAT5\_AB\_KNOCKIN\_TCELL\_6H\_UP  
132 -0.36613113 -1.477708 0.009803922  
0.026598373 1 2097 "tags=29%, list=15%, signal=33%"  
GSE5589\_LPS\_VS\_LPS\_AND\_IL10\_STIM\_IL10\_KO\_MACROPHAGE\_45MIN\_UP  
GSE5589\_LPS\_VS\_LPS\_AND\_IL10\_STIM\_IL10\_KO\_MACROPHAGE\_45MIN\_UP  
143 -0.36145604 -1.4776706 0.001956947  
0.026557256 1 3190 "tags=34%, list=23%, signal=43%"  
GSE35825\_UNTREATED\_VS\_IFNA\_STIM\_MACROPHAGE\_DN  
GSE35825\_UNTREATED\_VS\_IFNA\_STIM\_MACROPHAGE\_DN  
136 -0.362575 -1.477426 0.005769231  
0.026587533 1 2006 "tags=23%, list=14%, signal=26%"  
GSE6259\_BCELL\_VS\_CD8\_TCELL\_DN GSE6259\_BCELL\_VS\_CD8\_TCELL\_DN  
129 -0.36597022 -1.4773626 0.005628518

0.026555805 1 1979 "tags=29%, list=14%, signal=33%"  
GSE17721\_0.5H\_VS\_4H\_GARDIQUIMOD\_BMDC\_DN  
GSE17721\_0.5H\_VS\_4H\_GARDIQUIMOD\_BMDC\_DN  
153 -0.35132587 -1.4766766 0.005703422  
0.02676632 1 2194 "tags=25%, list=16%, signal=30%"  
GSE13887\_HEALTHY\_VS\_LUPUS\_RESTING\_CD4\_TCELL\_UP  
GSE13887\_HEALTHY\_VS\_LUPUS\_RESTING\_CD4\_TCELL\_UP  
90 -0.38570908 -1.4755622 0.011299435  
0.027116647 1 1958 "tags=26%, list=14%, signal=29%"  
GSE11961\_MARGINAL\_ZONE\_BCELL\_VS\_MEMORY\_BCELL\_DAY40\_UP  
GSE11961\_MARGINAL\_ZONE\_BCELL\_VS\_MEMORY\_BCELL\_DAY40\_UP  
140 -0.35358426 -1.4735304 0.007233273  
0.027769795 1 2551 "tags=29%, list=18%, signal=35%"  
GSE29164\_UNTREATED\_VS\_CD8\_TCELL\_AND\_IL12\_TREATED\_MELANOMA\_DAY3\_UP  
GSE29164\_UNTREATED\_VS\_CD8\_TCELL\_AND\_IL12\_TREATED\_MELANOMA\_DAY3\_UP  
143 -0.3559954 -1.4735003 0.007590133  
0.027726972 1 1537 "tags=20%, list=11%, signal=22%"  
GSE11961\_MARGINAL\_ZONE\_BCELL\_VS\_GERMINAL\_CENTER\_BCELL\_DAY7\_UP  
GSE11961\_MARGINAL\_ZONE\_BCELL\_VS\_GERMINAL\_CENTER\_BCELL\_DAY7\_UP  
131 -0.361546 -1.4729723 0.007648184  
0.02785382 1 2058 "tags=27%, list=15%, signal=32%"  
GSE17721\_CTRL\_VS\_PAM3CSK4\_1H\_BMDC\_DN  
GSE17721\_CTRL\_VS\_PAM3CSK4\_1H\_BMDC\_DN  
162 -0.3525055 -1.4728607 0.001897533  
0.027845956 1 3339 "tags=32%, list=24%, signal=42%"  
GSE43863\_NAIVE\_VS\_MEMORY\_TH1\_CD4\_TCELL\_D150\_LCMV\_UP  
GSE43863\_NAIVE\_VS\_MEMORY\_TH1\_CD4\_TCELL\_D150\_LCMV\_UP  
95 -0.37673432 -1.4723111 0.005836576  
0.027952805 1 3045 "tags=32%, list=22%, signal=40%"  
GSE14908\_RESTING\_VS\_HDM\_STIM\_CD4\_TCELL\_ATOPIC\_PATIENT\_DN  
GSE14908\_RESTING\_VS\_HDM\_STIM\_CD4\_TCELL\_ATOPIC\_PATIENT\_DN  
146 -0.35597453 -1.4720733 0.0078125  
0.027982987 1 1342 "tags=21%, list=10%, signal=22%"  
GSE14769\_UNSTIM\_VS\_20MIN\_LPS\_BMDM\_DN  
GSE14769\_UNSTIM\_VS\_20MIN\_LPS\_BMDM\_DN  
147 -0.355604 -1.4717151 0.012867647  
0.02805105 1 2344 "tags=31%, list=17%, signal=37%"  
GSE13522\_WT\_VS\_IFNAR\_KO\_SKING\_T\_CRUZI\_Y\_STRAIN\_INF\_UP  
GSE13522\_WT\_VS\_IFNAR\_KO\_SKING\_T\_CRUZI\_Y\_STRAIN\_INF\_UP  
142 -0.36218297 -1.4716384 0.013384321  
0.028027814 1 1254 "tags=23%, list=9%, signal=25%"  
GSE24634\_TREG\_VS\_TCONV\_POST\_DAY5\_IL4\_CONVERSION\_DN  
GSE24634\_TREG\_VS\_TCONV\_POST\_DAY5\_IL4\_CONVERSION\_DN  
131 -0.3653526 -1.4716151 0.005928854  
0.027979026 1 2925 "tags=34%, list=21%, signal=42%"  
GSE5589\_IL6\_KO\_VS\_IL10\_KO\_LPS\_AND\_IL6\_STIM\_MACROPHAGE\_45MIN\_DN  
GSE5589\_IL6\_KO\_VS\_IL10\_KO\_LPS\_AND\_IL6\_STIM\_MACROPHAGE\_45MIN\_DN  
144 -0.3608059 -1.4707578 0.003898636  
0.028192926 1 2324 "tags=26%, list=16%, signal=31%"  
GSE3039\_NKT\_CELL\_VS\_ALPHAALPHA\_CD8\_TCELL\_UP  
GSE3039\_NKT\_CELL\_VS\_ALPHAALPHA\_CD8\_TCELL\_UP  
149 -0.3515904 -1.4701533 0.01119403  
0.02833866 1 2180 "tags=29%, list=15%, signal=34%"  
GSE10240\_CTRL\_VS\_IL22\_STIM\_PRIMARY\_BRONCHIAL\_EPITHELIAL\_CELLS\_UP



GSE10240\_CTRL\_VS\_IL22\_STIM\_PRIMARY\_BRONCHIAL\_EPITHELIAL\_CELLS\_UP  
146 -0.35707977 -1.469526 0.003676471  
0.028500061 1 2366 "tags=26%, list=17%, signal=31%"  
GSE24210\_IL35\_TREATED\_VS\_RESTING\_TREG\_DN  
GSE24210\_IL35\_TREATED\_VS\_RESTING\_TREG\_DN  
144 -0.35632658 -1.4692506 0.005725191  
0.028552387 1 3241 "tags=28%, list=23%, signal=36%"  
GSE29617\_CTRL\_VS\_DAY7\_TIV\_FLU\_VACCINE\_PBMC\_2008\_UP  
GSE29617\_CTRL\_VS\_DAY7\_TIV\_FLU\_VACCINE\_PBMC\_2008\_UP  
133 -0.35998914 -1.4690957 0.004040404  
0.02855417 1 1975 "tags=27%, list=14%, signal=31%"  
GSE10239\_MEMORY\_VS\_DAY4.5\_EFF\_CD8\_TCELL\_UP  
GSE10239\_MEMORY\_VS\_DAY4.5\_EFF\_CD8\_TCELL\_UP  
139 -0.35690632 -1.4689927 0.00990099  
0.028534884 1 1704 "tags=24%, list=12%, signal=27%"  
GSE46606\_DAY1\_VS\_DAY3\_CD40L\_IL2\_IL5\_STIMULATED\_BCELL\_UP  
GSE46606\_DAY1\_VS\_DAY3\_CD40L\_IL2\_IL5\_STIMULATED\_BCELL\_UP  
110 -0.36948156 -1.468469 0.015267176  
0.028672354 1 2290 "tags=26%, list=16%, signal=31%"  
GSE13485\_DAY3\_VS\_DAY21\_YF17D\_VACCINE\_PBMC\_DN  
GSE13485\_DAY3\_VS\_DAY21\_YF17D\_VACCINE\_PBMC\_DN  
98 -0.37662417 -1.4683855 0.015384615  
0.028647155 1 5261 "tags=50%, list=37%, signal=79%"  
GSE21033\_CTRL\_VS\_POLYIC\_STIM\_DC\_24H\_UP  
GSE21033\_CTRL\_VS\_POLYIC\_STIM\_DC\_24H\_UP  
111 -0.37217104 -1.4662181 0.012121212  
0.029348455 1 2263 "tags=29%, list=16%, signal=34%"  
GSE38697\_LIGHT\_ZONE\_VS\_DARK\_ZONE\_BCELL\_DN  
GSE38697\_LIGHT\_ZONE\_VS\_DARK\_ZONE\_BCELL\_DN  
84 -0.39096275 -1.465943 0.01778656  
0.02936807 1 6627 "tags=63%, list=47%, signal=118%"  
GSE16266\_LPS\_VS\_HEATSHOCK\_AND\_LPS\_STIM\_MEF\_DN  
GSE16266\_LPS\_VS\_HEATSHOCK\_AND\_LPS\_STIM\_MEF\_DN  
144 -0.35621834 -1.4657763 0.00591716  
0.029366583 1 1775 "tags=23%, list=13%, signal=26%"  
GSE37301\_PRO\_BCELL\_VS\_CD4\_TCELL\_UP  
GSE37301\_PRO\_BCELL\_VS\_CD4\_TCELL\_UP  
127 -0.3625197 -1.4656931 0.005825243  
0.029344555 1 1371 "tags=25%, list=10%, signal=28%"  
GSE5099\_CLASSICAL\_M1\_VS\_ALTERNATIVE\_M2\_MACROPHAGE\_UP  
GSE5099\_CLASSICAL\_M1\_VS\_ALTERNATIVE\_M2\_MACROPHAGE\_UP  
128 -0.36252552 -1.465542 0.016885553  
0.029344842 1 1602 "tags=25%, list=11%, signal=28%"  
GSE21546\_ELK1\_KO\_VS\_SAP1A\_KO\_AND\_ELK1\_KO\_ANTI\_CD3\_STIM\_DP\_THYMOCYTES\_DN  
GSE21546\_ELK1\_KO\_VS\_SAP1A\_KO\_AND\_ELK1\_KO\_ANTI\_CD3\_STIM\_DP\_THYMOCYTES\_DN  
139 -0.35563412 -1.4648008  
0.016853932 0.029575704 1 1457 "tags=20%,  
list=10%, signal=22%"  
GSE22886\_CD8\_TCELL\_VS\_BCELL\_NAIVE\_DN  
GSE22886\_CD8\_TCELL\_VS\_BCELL\_NAIVE\_DN  
129 -0.35799077 -1.4641645 0.01369863  
0.029754983 1 2515 "tags=27%, list=18%, signal=33%"  
GSE17721\_LPS\_VS\_GARDIQUIMOD\_2H\_BMDC\_UP

GSE17721\_LPS\_VS\_GARDIQUIMOD\_2H\_BMDC\_UP  
160 -0.35170442 -1.4641201 0.007633588  
0.02972215 1 1821 "tags=21%, list=13%, signal=24%"  
GSE2405\_S\_AUREUS\_VS\_A\_PHAGOCYTOPHILUM\_NEUTROPHIL\_UP  
GSE2405\_S\_AUREUS\_VS\_A\_PHAGOCYTOPHILUM\_NEUTROPHIL\_UP  
144 -0.35381833 -1.4626156 0.013592233  
0.030239359 1 1783 "tags=22%, list=13%, signal=24%"  
GSE4142\_NAIVE\_BCELL\_VS\_PLASMA\_CELL\_UP  
GSE4142\_NAIVE\_BCELL\_VS\_PLASMA\_CELL\_UP  
146 -0.35350764 -1.4603666 0.003759399  
0.03105087 1 2123 "tags=27%, list=15%, signal=32%"  
GSE18791\_CTRL\_VS\_NEWCASTLE\_VIRUS\_DC\_8H\_DN  
GSE18791\_CTRL\_VS\_NEWCASTLE\_VIRUS\_DC\_8H\_DN  
125 -0.36069506 -1.4597828 0.007575758  
0.031233922 1 2377 "tags=31%, list=17%, signal=37%"  
GSE13306\_TREG\_VS\_TCONV\_SPLEEN\_UP GSE13306\_TREG\_VS\_TCONV\_SPLEEN\_UP  
133 -0.3585731 -1.459054 0.0056926  
0.031462796 1 1783 "tags=24%, list=13%, signal=27%"  
GSE2128\_C57BL6\_VS\_NOD\_CD4CD8\_DP\_THYMOCYTE\_UP  
GSE2128\_C57BL6\_VS\_NOD\_CD4CD8\_DP\_THYMOCYTE\_UP  
139 -0.35383862 -1.4579588 0.00952381  
0.031836174 1 1323 "tags=21%, list=9%, signal=23%"  
GSE21546\_WT\_VS\_SAP1A\_KO\_AND\_ELK1\_KO\_DP\_THYMOCYTES\_DN  
GSE21546\_WT\_VS\_SAP1A\_KO\_AND\_ELK1\_KO\_DP\_THYMOCYTES\_DN  
151 -0.35410497 -1.4577767 0.012448133  
0.031837486 1 2291 "tags=28%, list=16%, signal=34%"  
GSE34006\_WT\_VS\_A2AR\_KO\_TREG\_DN GSE34006\_WT\_VS\_A2AR\_KO\_TREG\_DN  
144 -0.35297114 -1.4568961 0.005639098  
0.03213216 1 1766 "tags=22%, list=13%, signal=24%"  
GSE3039\_ALPHAALPHA\_CD8\_TCELL\_VS\_B2\_BCELL\_DN  
GSE3039\_ALPHAALPHA\_CD8\_TCELL\_VS\_B2\_BCELL\_DN  
152 -0.34905532 -1.4552296 0 0.032788843  
1 2169 "tags=28%, list=15%, signal=33%"  
GSE41978\_ID2\_KO\_VS\_BIM\_KO\_KLRG1\_LOW\_EFFECTOR\_CD8\_TCELL\_UP  
GSE41978\_ID2\_KO\_VS\_BIM\_KO\_KLRG1\_LOW\_EFFECTOR\_CD8\_TCELL\_UP  
134 -0.35137716 -1.4551022 0 0.032788847  
1 1766 "tags=25%, list=13%, signal=28%"  
GSE37533\_PPARG2\_FOXP3\_VS\_FOXP3\_TRANSDUCECD\_CD4\_TCELL\_DN  
GSE37533\_PPARG2\_FOXP3\_VS\_FOXP3\_TRANSDUCECD\_CD4\_TCELL\_DN  
131 -0.35611147 -1.4548236 0.023255814  
0.032824796 1 1817 "tags=24%, list=13%, signal=28%"  
GSE41867\_DAY6\_VS\_DAY15\_LCMV\_ARMSTRONG\_EFFECTOR\_CD8\_TCELL\_UP  
GSE41867\_DAY6\_VS\_DAY15\_LCMV\_ARMSTRONG\_EFFECTOR\_CD8\_TCELL\_UP  
129 -0.35681468 -1.4548157 0.01084991  
0.032772973 1 2610 "tags=27%, list=18%, signal=33%"  
GSE41867\_DAY6\_EFFECTOR\_VS\_DAY30\_MEMORY\_CD8\_TCELL\_LCMV\_ARMSTRONG\_DN  
GSE41867\_DAY6\_EFFECTOR\_VS\_DAY30\_MEMORY\_CD8\_TCELL\_LCMV\_ARMSTRONG\_DN  
143 -0.35609585 -1.4547808 0.007692308  
0.032734297 1 2494 "tags=33%, list=18%, signal=40%"  
GSE30971\_CTRL\_VS\_LPS\_STIM\_MACROPHAGE\_WBP7\_KO\_2H\_UP  
GSE30971\_CTRL\_VS\_LPS\_STIM\_MACROPHAGE\_WBP7\_KO\_2H\_UP  
140 -0.35409912 -1.4543502 0.006085193  
0.032803327 1 1387 "tags=19%, list=10%, signal=20%"  
GSE13547\_CTRL\_VS\_ANTI\_IGM\_STIM\_ZFX\_KO\_BCELL\_2H\_DN

GSE13547\_CTRL\_VS\_ANTI\_IGM\_STIM\_ZFX\_KO\_BCELL\_2H\_DN  
141 -0.35874537 -1.4542654 0.011627907  
0.03278618 1 1277 "tags=21%, list=9%, signal=22%"  
GSE20366\_CD103\_POS\_VS\_NEG\_TREG\_KLRG1NEG\_DN  
GSE20366\_CD103\_POS\_VS\_NEG\_TREG\_KLRG1NEG\_DN  
158 -0.35023582 -1.4524345 0.005725191  
0.033469006 1 2452 "tags=27%, list=17%, signal=33%"  
GSE5589\_LPS\_AND\_IL10\_VS\_LPS\_AND\_IL6\_STIM\_MACROPHAGE\_45MIN\_UP  
GSE5589\_LPS\_AND\_IL10\_VS\_LPS\_AND\_IL6\_STIM\_MACROPHAGE\_45MIN\_UP  
144 -0.35661206 -1.4516827 0.011406845  
0.033733796 1 2311 "tags=28%, list=16%, signal=33%"  
GSE15930\_NAIVE\_VS\_48H\_IN\_VITRO\_STIM\_IL12\_CD8\_TCELL\_UP  
GSE15930\_NAIVE\_VS\_48H\_IN\_VITRO\_STIM\_IL12\_CD8\_TCELL\_UP  
151 -0.34858328 -1.4498498 0.00589391  
0.03445326 1 3024 "tags=30%, list=21%, signal=38%"  
GSE27896\_HDAC6\_KO\_VS\_WT\_TREG\_UP GSE27896\_HDAC6\_KO\_VS\_WT\_TREG\_UP  
126 -0.3603903 -1.4498198 0.011976048  
0.034416292 1 1656 "tags=25%, list=12%, signal=28%"  
GSE19888\_ADENOSINE\_A3R\_INH\_VS\_INH\_PRETREAT\_AND\_ACT\_WITH\_TCELL\_MEMBRA  
NES\_MAST\_CELL\_UP  
GSE19888\_ADENOSINE\_A3R\_INH\_VS\_INH\_PRETREAT\_AND\_ACT\_WITH\_TCELL\_MEMBRA  
NES\_MAST\_CELL\_UP 137 -0.35286137 -1.4497313  
0.003937008 0.03439944 1 2187 "tags=28%,  
list=15%, signal=33%"  
GSE19198\_CTRL\_VS\_IL21\_TREATED\_TCELL\_1H\_UP  
GSE19198\_CTRL\_VS\_IL21\_TREATED\_TCELL\_1H\_UP  
106 -0.3643069 -1.4489841 0.018691588  
0.034665376 1 2570 "tags=28%, list=18%, signal=34%"  
GSE17301\_IFNA2\_VS\_IFNA2\_AND\_ACD3\_ACD28\_STIM\_CD8\_TCELL\_UP  
GSE17301\_IFNA2\_VS\_IFNA2\_AND\_ACD3\_ACD28\_STIM\_CD8\_TCELL\_UP  
137 -0.3554477 -1.4480821 0.011320755  
0.034996334 1 1198 "tags=19%, list=8%, signal=21%"  
GSE40274\_CTRL\_VS\_FOXP3\_AND\_LEF1\_TRANSDUCE\_ACTIVATED\_CD4\_TCELL\_UP  
GSE40274\_CTRL\_VS\_FOXP3\_AND\_LEF1\_TRANSDUCE\_ACTIVATED\_CD4\_TCELL\_UP  
132 -0.35729647 -1.4471723 0.009276438  
0.03535444 1 1776 "tags=24%, list=13%, signal=27%"  
GSE10239\_NAIVE\_VS\_MEMORY\_CD8\_TCELL\_UP  
GSE10239\_NAIVE\_VS\_MEMORY\_CD8\_TCELL\_UP  
143 -0.35092422 -1.4466828 0.007766991  
0.035502356 1 2484 "tags=28%, list=18%, signal=34%"  
GSE6259\_33D1\_POS\_VS\_DEC205\_POS\_SPLENIC\_DC\_DN  
GSE6259\_33D1\_POS\_VS\_DEC205\_POS\_SPLENIC\_DC\_DN  
141 -0.34812766 -1.4463518 0.005681818  
0.035583932 1 1544 "tags=19%, list=11%, signal=21%"  
GSE20727\_DNFB\_ALLERGEN\_VS\_ROS\_INH\_AND\_DNFB\_ALLERGEN\_TREATED\_DC\_UP  
GSE20727\_DNFB\_ALLERGEN\_VS\_ROS\_INH\_AND\_DNFB\_ALLERGEN\_TREATED\_DC\_UP  
111 -0.36627916 -1.4449832 0.018  
0.0361041 1 1934 "tags=22%, list=14%, signal=25%"  
GSE22886\_TCELL\_VS\_BCELL\_NAIVE\_DN GSE22886\_TCELL\_VS\_BCELL\_NAIVE\_DN  
130 -0.358399 -1.4448448 0.005681818  
0.036101505 1 2254 "tags=27%, list=16%, signal=32%"  
GSE18804\_BRAIN\_VS\_COLON\_TUMORAL\_MACROPHAGE\_UP  
GSE18804\_BRAIN\_VS\_COLON\_TUMORAL\_MACROPHAGE\_UP  
123 -0.35824454 -1.4434048 0.013307985

0.036699265 1 2910 "tags=31%, list=21%, signal=39%"  
GSE25088\_CTRL\_VS\_IL4\_STIM\_STAT6\_KO\_MACROPHAGE\_UP  
GSE25088\_CTRL\_VS\_IL4\_STIM\_STAT6\_KO\_MACROPHAGE\_UP  
121 -0.3556689 -1.4432187 0.00998004  
0.03671663 1 2135 "tags=28%, list=15%, signal=33%"  
GSE15330\_MEGAKARYOCYTE\_ERYTHROID\_VS\_GRANULOCYTE\_MONOCYTE\_PROGENITOR\_DN  
GSE15330\_MEGAKARYOCYTE\_ERYTHROID\_VS\_GRANULOCYTE\_MONOCYTE\_PROGENITOR\_DN  
162 -0.3448642 -1.4428735  
0.009803922 0.036800794 1 1240 "tags=19%,  
list=9%, signal=20%"  
GSE2770\_IL12\_VS\_IL4\_TREATED\_ACT\_CD4\_TCELL\_48H\_DN  
GSE2770\_IL12\_VS\_IL4\_TREATED\_ACT\_CD4\_TCELL\_48H\_DN  
136 -0.35081005 -1.4422699 0.003780718  
0.03699376 1 1478 "tags=23%, list=10%, signal=25%"  
GSE16450\_IMMATURE\_VS\_MATURE\_NEURON\_CELL\_LINE\_UP  
GSE16450\_IMMATURE\_VS\_MATURE\_NEURON\_CELL\_LINE\_UP  
122 -0.35828334 -1.4420614 0.018 0.03701054  
1 2028 "tags=24%, list=14%, signal=28%"  
GSE19825\_NAIVE\_VS\_IL2RALOW\_DAY3\_EFF\_CD8\_TCELL\_UP  
GSE19825\_NAIVE\_VS\_IL2RALOW\_DAY3\_EFF\_CD8\_TCELL\_UP  
145 -0.35021374 -1.4417961 0.011111111  
0.037056677 1 4548 "tags=39%, list=32%, signal=56%"  
GSE7568\_CTRL\_VS\_3H\_TGFB\_TREATED\_MACROPHAGES\_WITH\_IL4\_AND\_DEXAMETHASONE\_DN  
GSE7568\_CTRL\_VS\_3H\_TGFB\_TREATED\_MACROPHAGES\_WITH\_IL4\_AND\_DEXAMETHASONE\_DN  
123 -0.35228914 -1.4415959  
0.019120459 0.037081636 1 2530 "tags=33%,  
list=18%, signal=39%"  
GSE24634\_NAIVE\_CD4\_TCELL\_VS\_DAY7\_IL4\_CONV\_TREG\_UP  
GSE24634\_NAIVE\_CD4\_TCELL\_VS\_DAY7\_IL4\_CONV\_TREG\_UP  
125 -0.35685515 -1.4413378 0.013157895  
0.037167456 1 1856 "tags=23%, list=13%, signal=26%"  
GSE7852\_LN\_VS\_FAT\_TCONV\_UP GSE7852\_LN\_VS\_FAT\_TCONV\_UP  
125 -0.35446483 -1.4407492 0.00967118  
0.037386302 1 2355 "tags=28%, list=17%, signal=33%"  
GSE34515\_CD16\_POS\_MONOCYTE\_VS\_DC\_UP  
GSE34515\_CD16\_POS\_MONOCYTE\_VS\_DC\_UP  
148 -0.3427232 -1.4403746 0.015151516  
0.037517034 1 2137 "tags=30%, list=15%, signal=35%"  
GSE13547\_CTRL\_VS\_ANTI\_IGM\_STIM\_BCELL\_2H\_DN  
GSE13547\_CTRL\_VS\_ANTI\_IGM\_STIM\_BCELL\_2H\_DN  
128 -0.35663506 -1.4397349 0.015717093  
0.03773164 1 1779 "tags=23%, list=13%, signal=26%"  
GSE8685\_IL2\_STARVED\_VS\_IL21\_ACT\_IL2\_STARVED\_CD4\_TCELL\_UP  
GSE8685\_IL2\_STARVED\_VS\_IL21\_ACT\_IL2\_STARVED\_CD4\_TCELL\_UP  
146 -0.3470194 -1.4396483 0.009633912  
0.037708428 1 2331 "tags=29%, list=17%, signal=34%"  
GSE46606\_IRF4MID\_VS\_WT\_CD40L\_IL2\_IL5\_DAY1\_STIMULATED\_BCELL\_DN  
GSE46606\_IRF4MID\_VS\_WT\_CD40L\_IL2\_IL5\_DAY1\_STIMULATED\_BCELL\_DN  
151 -0.34498194 -1.4390501 0.01171875  
0.03794087 1 3198 "tags=34%, list=23%, signal=44%"  
GSE9239\_CTRL\_VS\_TNF\_INHIBITOR\_TREATED\_DC\_UP  
GSE9239\_CTRL\_VS\_TNF\_INHIBITOR\_TREATED\_DC\_UP

|                                                                            |             |                                                                            |                                       |
|----------------------------------------------------------------------------|-------------|----------------------------------------------------------------------------|---------------------------------------|
| 145                                                                        | -0.3506185  | -1.438765                                                                  | 0.005964215                           |
| 0.03802984                                                                 | 1           | 2156                                                                       | "tags=27%, list=15%, signal=31%"      |
| GSE7460_TCONV_VS_TREG_LN_DN                                                |             | GSE7460_TCONV_VS_TREG_LN_DN                                                |                                       |
| 156                                                                        | -0.35018542 | -1.4385186                                                                 | 0.017716536                           |
| 0.038078822                                                                | 1           | 1963                                                                       | "tags=28%, list=14%, signal=32%"      |
| GSE7509_UNSTIM_VS_TNFA_IL1B_IL6_PGE_STIM_DC_DN                             |             | GSE7509_UNSTIM_VS_TNFA_IL1B_IL6_PGE_STIM_DC_DN                             |                                       |
| 61                                                                         | -0.40309063 | -1.4381119                                                                 | 0.03914591                            |
| 0.038212795                                                                | 1           | 4459                                                                       | "tags=41%, list=32%, signal=60%"      |
| GSE14308_TH2_VS_INDUCED_TREG_UP                                            |             | GSE14308_TH2_VS_INDUCED_TREG_UP                                            |                                       |
| 142                                                                        | -0.3471866  | -1.436049                                                                  | 0.011152417                           |
| 0.03908254                                                                 | 1           | 2145                                                                       | "tags=30%, list=15%, signal=35%"      |
| GSE19941_LPS_VS_LPS_AND_IL10_STIM_IL10_KO_NFKBP50_KO_MACROPHAGE_DN         |             | GSE19941_LPS_VS_LPS_AND_IL10_STIM_IL10_KO_NFKBP50_KO_MACROPHAGE_DN         |                                       |
| 152                                                                        | -0.3469133  | -1.4353691                                                                 | 0.005847953                           |
| 0.03935055                                                                 | 1           | 1055                                                                       | "tags=18%, list=7%, signal=19%"       |
| GSE36888_STAT5_AB_KNOCKIN_VS_WT_TCELL_IL2_TREATED_2H_UP                    |             | GSE36888_STAT5_AB_KNOCKIN_VS_WT_TCELL_IL2_TREATED_2H_UP                    |                                       |
| 136                                                                        | -0.35337403 | -1.4351662                                                                 | 0.006085193                           |
| 0.03939486                                                                 | 1           | 1840                                                                       | "tags=22%, list=13%, signal=25%"      |
| GSE30971_CTRL_VS_LPS_STIM_MACROPHAGE_WBP7_KO_4H_UP                         |             | GSE30971_CTRL_VS_LPS_STIM_MACROPHAGE_WBP7_KO_4H_UP                         |                                       |
| 141                                                                        | -0.34706974 | -1.4324799                                                                 | 0.004024145                           |
| 0.040604547                                                                | 1           | 1387                                                                       | "tags=18%, list=10%, signal=20%"      |
| GSE41867_DAY15_EFFECTOR_VS_DAY30_MEMORY_CD8_TCELL_LCMV_ARMSTRONG_UP        |             | GSE41867_DAY15_EFFECTOR_VS_DAY30_MEMORY_CD8_TCELL_LCMV_ARMSTRONG_UP        |                                       |
| 142                                                                        | -0.34724078 | -1.4319762                                                                 | 0.009363296                           |
| 0.040779322                                                                | 1           | 1455                                                                       | "tags=21%, list=10%, signal=23%"      |
| GSE11961_MARGINAL_ZONE_BCELL_VS_GERMINAL_CENTER_BCELL_DAY40_DN             |             | GSE11961_MARGINAL_ZONE_BCELL_VS_GERMINAL_CENTER_BCELL_DAY40_DN             |                                       |
| 152                                                                        | -0.34300148 | -1.43184                                                                   | 0.011363637                           |
| 0.040781505                                                                | 1           | 1925                                                                       | "tags=28%, list=14%, signal=32%"      |
| GSE19401_RETINOIC_ACID_VS_RETINOIC_ACID_AND_PAM2CSK4_STIM_FOLLICULAR_DC_UP |             | GSE19401_RETINOIC_ACID_VS_RETINOIC_ACID_AND_PAM2CSK4_STIM_FOLLICULAR_DC_UP |                                       |
| 148                                                                        | -0.34972593 | -1.4311016                                                                 |                                       |
| 0.008048289                                                                | 0.04109727  | 1                                                                          | 2630 "tags=26%, list=19%, signal=32%" |
| GSE17721_PAM3CSK4_VS_CPG_16H_BMDC_UP                                       |             | GSE17721_PAM3CSK4_VS_CPG_16H_BMDC_UP                                       |                                       |
| 137                                                                        | -0.35156447 | -1.430512                                                                  | 0.007648184                           |
| 0.041290846                                                                | 1           | 798                                                                        | "tags=15%, list=6%, signal=15%"       |
| GSE14308_TH1_VS_NAIVE_CD4_TCELL_DN                                         |             | GSE14308_TH1_VS_NAIVE_CD4_TCELL_DN                                         |                                       |
| 129                                                                        | -0.35422125 | -1.4291815                                                                 | 0.019011406                           |
| 0.041912172                                                                | 1           | 3177                                                                       | "tags=33%, list=23%, signal=43%"      |
| GSE4748_LPS_VS_LPS_AND_CYANOBACTERIUM_LPSLIKE_STIM_DC_3H_UP                |             | GSE4748_LPS_VS_LPS_AND_CYANOBACTERIUM_LPSLIKE_STIM_DC_3H_UP                |                                       |
| 129                                                                        | -0.34994993 | -1.4274215                                                                 | 0.017142856                           |
| 0.0427548                                                                  | 1           | 1594                                                                       | "tags=27%, list=11%, signal=30%"      |
| GSE32423_MEMORY_VS_NAIVE_CD8_TCELL_IL7_UP                                  |             | GSE32423_MEMORY_VS_NAIVE_CD8_TCELL_IL7_UP                                  |                                       |
| 128                                                                        | -0.35183257 | -1.4272683                                                                 | 0.007677543                           |
| 0.042764705                                                                | 1           | 1800                                                                       | "tags=26%, list=13%, signal=29%"      |

GSE17974\_IL4\_AND\_ANTI\_IL12\_VS\_UNTREATED\_12H\_ACT\_CD4\_TCELL\_DN  
GSE17974\_IL4\_AND\_ANTI\_IL12\_VS\_UNTREATED\_12H\_ACT\_CD4\_TCELL\_DN  
120 -0.35169765 -1.4271461 0.013435701  
0.04276635 1 546 "tags=12%, list=4%, signal=12%"  
GSE12366\_GC\_VS\_MEMORY\_BCELL\_DN GSE12366\_GC\_VS\_MEMORY\_BCELL\_DN  
133 -0.34798455 -1.4253794 0.012915129  
0.043556444 1 1245 "tags=21%, list=9%, signal=23%"  
GSE17974\_CTRL\_VS\_ACT\_IL4\_AND\_ANTI\_IL12\_6H\_CD4\_TCELL\_DN  
GSE17974\_CTRL\_VS\_ACT\_IL4\_AND\_ANTI\_IL12\_6H\_CD4\_TCELL\_DN  
132 -0.3486515 -1.4250276 0.005769231  
0.043667547 1 3176 "tags=34%, list=23%, signal=44%"  
GSE5542\_UNTREATED\_VS\_IFNA\_TREATED\_EPITHELIAL\_CELLS\_6H\_DN  
GSE5542\_UNTREATED\_VS\_IFNA\_TREATED\_EPITHELIAL\_CELLS\_6H\_DN  
127 -0.3553401 -1.4245911 0.011538462  
0.043825354 1 1399 "tags=20%, list=10%, signal=23%"  
GSE14308\_TH1\_VS\_NATURAL\_TREG\_DN GSE14308\_TH1\_VS\_NATURAL\_TREG\_DN  
135 -0.3516589 -1.424096 0.015296367  
0.044001088 1 1873 "tags=25%, list=13%, signal=29%"  
GSE3982\_CENT\_MEMORY\_CD4\_TCELL\_VS\_TH2\_UP  
GSE3982\_CENT\_MEMORY\_CD4\_TCELL\_VS\_TH2\_UP  
125 -0.35021257 -1.4232143 0.009560229  
0.04437639 1 2638 "tags=26%, list=19%, signal=32%"  
GSE411\_WT\_VS\_SOCS3\_KO\_MACROPHAGE\_DN  
GSE411\_WT\_VS\_SOCS3\_KO\_MACROPHAGE\_DN  
140 -0.3482872 -1.4229469 0.012216405  
0.04444966 1 2071 "tags=29%, list=15%, signal=34%"  
GSE11057\_EFF\_MEM\_VS\_CENT\_MEM\_CD4\_TCELL\_UP  
GSE11057\_EFF\_MEM\_VS\_CENT\_MEM\_CD4\_TCELL\_UP  
137 -0.34853953 -1.422815 0.014814815  
0.04443914 1 1713 "tags=22%, list=12%, signal=25%"  
GSE17721\_CTRL\_VS\_CPG\_4H\_BMDC\_DN GSE17721\_CTRL\_VS\_CPG\_4H\_BMDC\_DN  
154 -0.33822453 -1.4220054 0.015810277  
0.04479162 1 2106 "tags=23%, list=15%, signal=27%"  
GSE1925\_CTRL\_VS\_3H\_IFNG\_STIM\_MACROPHAGE\_UP  
GSE1925\_CTRL\_VS\_3H\_IFNG\_STIM\_MACROPHAGE\_UP  
150 -0.34501168 -1.421397 0.011090573  
0.04500336 1 1703 "tags=21%, list=12%, signal=23%"  
GSE21670\_STAT3\_KO\_VS\_WT\_CD4\_TCELL\_DN  
GSE21670\_STAT3\_KO\_VS\_WT\_CD4\_TCELL\_DN  
149 -0.3422315 -1.4207034 0.013257576  
0.04528015 1 1864 "tags=27%, list=13%, signal=31%"  
GSE411\_100MIN\_VS\_400MIN\_IL6\_STIM\_SOCS3\_KO\_MACROPHAGE\_DN  
GSE411\_100MIN\_VS\_400MIN\_IL6\_STIM\_SOCS3\_KO\_MACROPHAGE\_DN  
140 -0.34540612 -1.4191668 0.025540275  
0.04607808 1 2821 "tags=30%, list=20%, signal=37%"  
GSE30962\_ACUTE\_VS\_CHRONIC\_LCMV\_SECONDARY\_INF\_CD8\_TCELL\_UP  
GSE30962\_ACUTE\_VS\_CHRONIC\_LCMV\_SECONDARY\_INF\_CD8\_TCELL\_UP  
144 -0.34655204 -1.4189858 0.011472276  
0.04610455 1 1379 "tags=21%, list=10%, signal=23%"  
GSE25085\_FETAL\_BM\_VS\_ADULT\_BM\_SP4\_THYMIC\_IMPLANT\_UP  
GSE25085\_FETAL\_BM\_VS\_ADULT\_BM\_SP4\_THYMIC\_IMPLANT\_UP  
143 -0.3455736 -1.4189442 0.0227704  
0.04605495 1 1797 "tags=29%, list=13%, signal=33%"  
GSE11961\_MEMORY\_BCELL\_DAY7\_VS\_GERMINAL\_CENTER\_BCELL\_DAY7\_UP

GSE11961\_MEMORY\_BCELL\_DAY7\_VS\_GERMINAL\_CENTER\_BCELL\_DAY7\_UP  
151 -0.3395474 -1.4187548 0.005780347  
0.046077576 1 1135 "tags=17%, list=8%, signal=18%"  
GSE25087\_FETAL\_VS\_ADULT\_TCONV\_DN GSE25087\_FETAL\_VS\_ADULT\_TCONV\_DN  
119 -0.35847417 -1.4187078 0.021442495  
0.046036016 1 2252 "tags=29%, list=16%, signal=34%"  
GSE8921\_UNSTIM\_VS\_TLR1\_2\_STIM\_MONOCYTE\_3H\_DN  
GSE8921\_UNSTIM\_VS\_TLR1\_2\_STIM\_MONOCYTE\_3H\_DN  
145 -0.34350112 -1.4185735 0.009560229  
0.046029966 1 2322 "tags=28%, list=16%, signal=33%"  
GSE17974\_IL4\_AND\_ANTI\_IL12\_VS\_UNTREATED\_6H\_ACT\_CD4\_TCELL\_DN  
GSE17974\_IL4\_AND\_ANTI\_IL12\_VS\_UNTREATED\_6H\_ACT\_CD4\_TCELL\_DN  
134 -0.34727436 -1.4184641 0.019120459  
0.046004243 1 2943 "tags=33%, list=21%, signal=41%"  
GSE21927\_SPLENIC\_C26GM\_TUMOROUS\_VS\_BONE\_MARROW\_MONOCYTES\_UP  
GSE21927\_SPLENIC\_C26GM\_TUMOROUS\_VS\_BONE\_MARROW\_MONOCYTES\_UP  
106 -0.36168784 -1.41809 0.01734104 0.046111736  
1 2480 "tags=22%, list=18%, signal=26%"  
GSE20366\_CD103\_KLRG1\_DP\_VS\_DN\_TREG\_UP  
GSE20366\_CD103\_KLRG1\_DP\_VS\_DN\_TREG\_UP  
140 -0.34112644 -1.4158478 0.015779093  
0.047259927 1 2139 "tags=26%, list=15%, signal=30%"  
GSE4984\_LPS\_VS\_VEHICLE\_CTRL\_TREATED\_DC\_UP  
GSE4984\_LPS\_VS\_VEHICLE\_CTRL\_TREATED\_DC\_UP  
122 -0.35435832 -1.4157892 0.015296367  
0.0472232 1 1833 "tags=20%, list=13%, signal=23%"  
GSE6674\_ANTI\_IGM\_VS\_CPG\_STIM\_BCELL\_UP  
GSE6674\_ANTI\_IGM\_VS\_CPG\_STIM\_BCELL\_UP  
136 -0.34985718 -1.4151995 0.012891345  
0.047485404 1 1934 "tags=28%, list=14%, signal=32%"  
GSE41867\_DAY15\_EFFECTOR\_VS\_DAY30\_MEMORY\_CD8\_TCELL\_LCMV\_ARMSTRONG\_DN  
GSE41867\_DAY15\_EFFECTOR\_VS\_DAY30\_MEMORY\_CD8\_TCELL\_LCMV\_ARMSTRONG\_DN  
104 -0.3621508 -1.4149308 0.025925925  
0.047556482 1 2585 "tags=32%, list=18%, signal=39%"  
GSE5679\_PPARG\_LIGAND\_ROSIGLITAZONE\_VS\_ROSIGLITAZONE\_AND\_RARA\_AGONIST  
\_AM580\_TREATED\_DC\_DN  
GSE5679\_PPARG\_LIGAND\_ROSIGLITAZONE\_VS\_ROSIGLITAZONE\_AND\_RARA\_AGONIST  
\_AM580\_TREATED\_DC\_DN  
137 -0.33958596 -1.4146036 0.022857143  
0.04767885 1 3298 "tags=39%, list=23%, signal=51%"  
GSE25087\_FETAL\_VS\_ADULT\_TREG\_DN GSE25087\_FETAL\_VS\_ADULT\_TREG\_DN  
125 -0.35106227 -1.4144375 0.017110266  
0.047697544 1 2402 "tags=30%, list=17%, signal=36%"  
GSE46606\_UNSTIM\_VS\_CD40L\_IL2\_IL5\_1DAY\_STIMULATED\_IRF4MID\_SORTED\_BCELL\_UP  
GSE46606\_UNSTIM\_VS\_CD40L\_IL2\_IL5\_1DAY\_STIMULATED\_IRF4MID\_SORTED\_BCELL\_UP  
149 -0.34136638 -1.4143286  
0.012244898 0.0477081 1 2080 "tags=28%,  
list=15%, signal=33%"  
GSE37301\_HEMATOPOIETIC\_STEM\_CELL\_VS\_COMMON\_LYMPHOID\_PROGENITOR\_DN  
GSE37301\_HEMATOPOIETIC\_STEM\_CELL\_VS\_COMMON\_LYMPHOID\_PROGENITOR\_DN  
149 -0.3416174 -1.4142467 0.012750455  
0.047680248 1 1759 "tags=23%, list=12%, signal=26%"  
GSE11961\_FOLLICULAR\_BCELL\_VS\_MEMORY\_BCELL\_DAY40\_DN

GSE11961\_FOLLICULAR\_BCELL\_VS\_MEMORY\_BCELL\_DAY40\_DN  
146 -0.3417169 -1.4139801 0.01509434  
0.04775929 1 2762 "tags=27%, list=20%, signal=33%"  
GSE21546\_WT\_VS\_ELK1\_KO\_DP\_THYMOCYTES\_UP  
GSE21546\_WT\_VS\_ELK1\_KO\_DP\_THYMOCYTES\_UP  
149 -0.34272572 -1.413251 0.016759777  
0.048128504 1 2347 "tags=23%, list=17%, signal=28%"  
GSE17721\_CTRL\_VS\_LPS\_2H\_BMDC\_DN GSE17721\_CTRL\_VS\_LPS\_2H\_BMDC\_DN  
153 -0.33523554 -1.4129443 0.009596929  
0.048228268 1 3308 "tags=31%, list=23%, signal=41%"  
GSE2197\_IMMUNOSUPPRESSIVE\_DNA\_VS\_UNTREATED\_IN\_DC\_UP  
GSE2197\_IMMUNOSUPPRESSIVE\_DNA\_VS\_UNTREATED\_IN\_DC\_UP  
144 -0.3429833 -1.4125841 0.00990099  
0.048355985 1 1723 "tags=23%, list=12%, signal=26%"  
GSE17186\_BLOOD\_VS\_CORD\_BLOOD\_CD21HIGH\_TRANSITIONAL\_BCELL\_DN  
GSE17186\_BLOOD\_VS\_CORD\_BLOOD\_CD21HIGH\_TRANSITIONAL\_BCELL\_DN  
141 -0.34862748 -1.4120777 0.025490196  
0.04855569 1 1826 "tags=27%, list=13%, signal=31%"  
GSE22935\_UNSTIM\_VS\_48H\_MBOVIS\_BCG\_STIM\_MACROPHAGE\_DN  
GSE22935\_UNSTIM\_VS\_48H\_MBOVIS\_BCG\_STIM\_MACROPHAGE\_DN  
145 -0.34158736 -1.411849 0.015968064  
0.04859328 1 2553 "tags=27%, list=18%, signal=32%"  
GSE34156\_TLR1\_TLR2\_LIGAND\_VS\_NOD2\_AND\_TLR1\_TLR2\_LIGAND\_24H\_TREATED\_M  
ONOCYTE\_DN  
GSE34156\_TLR1\_TLR2\_LIGAND\_VS\_NOD2\_AND\_TLR1\_TLR2\_LIGAND\_24H\_TREATED\_M  
ONOCYTE\_DN 143 -0.33926222 -1.411464  
0.017307693 0.048769463 1 2493 "tags=26%,  
list=18%, signal=31%"  
GSE13229\_IMM\_VS\_MATURE\_NKCELL\_UP GSE13229\_IMM\_VS\_MATURE\_NKCELL\_UP  
148 -0.33906743 -1.4114366 0.007797271  
0.048705827 1 2912 "tags=28%, list=21%, signal=35%"  
GSE37301\_COMMON\_LYMPHOID\_PROGENITOR\_VS\_GRAN\_MONO\_PROGENITOR\_DN  
GSE37301\_COMMON\_LYMPHOID\_PROGENITOR\_VS\_GRAN\_MONO\_PROGENITOR\_DN  
139 -0.34593707 -1.411269 0.007722008  
0.04874572 1 1463 "tags=18%, list=10%, signal=20%"  
GSE13411\_IGM\_MEMORY\_BCELL\_VS\_PLASMA\_CELL\_UP  
GSE13411\_IGM\_MEMORY\_BCELL\_VS\_PLASMA\_CELL\_UP  
132 -0.34695137 -1.4109342 0.015065913  
0.04884855 1 1800 "tags=22%, list=13%, signal=25%"  
GSE17721\_CTRL\_VS\_POLYIC\_1H\_BMDC\_DN  
GSE17721\_CTRL\_VS\_POLYIC\_1H\_BMDC\_DN  
157 -0.3355344 -1.4106501 0.007532957  
0.048930828 1 2424 "tags=24%, list=17%, signal=29%"  
GSE7348\_LPS\_VS\_TOLERIZED\_AND\_LPS\_STIM\_MACROPHAGE\_DN  
GSE7348\_LPS\_VS\_TOLERIZED\_AND\_LPS\_STIM\_MACROPHAGE\_DN  
147 -0.33640367 -1.4105351 0.009746589  
0.048912827 1 2125 "tags=25%, list=15%, signal=29%"  
GSE7568\_IL4\_VS\_IL4\_AND\_TGFB\_TREATED\_MACROPHAGE\_24H\_UP  
GSE7568\_IL4\_VS\_IL4\_AND\_TGFB\_TREATED\_MACROPHAGE\_24H\_UP  
132 -0.3433238 -1.4097204 0.017208412  
0.04935255 1 1656 "tags=22%, list=12%, signal=25%"  
GSE13738\_RESTING\_VS\_BYSTANDER\_ACTIVATED\_CD4\_TCELL\_UP  
GSE13738\_RESTING\_VS\_BYSTANDER\_ACTIVATED\_CD4\_TCELL\_UP  
98 -0.36004117 -1.4083543 0.03206413



0.050028063 1 1729 "tags=17%, list=12%, signal=20%"  
GSE6092\_UNSTIM\_VS\_IFNG\_STIM\_AND\_B\_BURGDORFERI\_INF\_ENDOTHELIAL\_CELL\_D  
N  
GSE6092\_UNSTIM\_VS\_IFNG\_STIM\_AND\_B\_BURGDORFERI\_INF\_ENDOTHELIAL\_CELL\_D  
N 143 -0.33892685 -1.4079615  
0.025242718 0.05018612 1 4617 "tags=36%,  
list=33%, signal=53%"  
GSE12366\_GC\_VS\_NAIVE\_BCELL\_DN GSE12366\_GC\_VS\_NAIVE\_BCELL\_DN  
119 -0.34970358 -1.4067029 0.015873017  
0.05082219 1 1509 "tags=22%, list=11%, signal=24%"  
GSE22601\_IMMATURE\_CD4\_SINGLE\_POSITIVE\_VS\_CD8\_SINGLE\_POSITIVE\_THYMOCY  
TE\_DN  
GSE22601\_IMMATURE\_CD4\_SINGLE\_POSITIVE\_VS\_CD8\_SINGLE\_POSITIVE\_THYMOCY  
TE\_DN 146 -0.3425494 -1.4062995  
0.025145067 0.05097737 1 1345 "tags=25%,  
list=10%, signal=28%"  
GSE46606\_IRF4\_KO\_VS\_WT\_UNSTIM\_BCELL\_UP  
GSE46606\_IRF4\_KO\_VS\_WT\_UNSTIM\_BCELL\_UP  
130 -0.34704062 -1.4061182 0.015625 0.0510042  
1 2213 "tags=32%, list=16%, signal=37%"  
GSE31082\_DP\_VS\_CD4\_SP\_THYMOCYTE\_DN  
GSE31082\_DP\_VS\_CD4\_SP\_THYMOCYTE\_DN  
141 -0.34292668 -1.4059819 0.019607844  
0.050993282 1 1634 "tags=23%, list=12%, signal=26%"  
GSE15735\_CTRL\_VS\_HDAC\_INHIBITOR\_TREATED\_CD4\_TCELL\_2H\_UP  
GSE15735\_CTRL\_VS\_HDAC\_INHIBITOR\_TREATED\_CD4\_TCELL\_2H\_UP  
155 -0.3355691 -1.4051466 0.007476636  
0.05138359 1 1207 "tags=20%, list=9%, signal=22%"  
GSE3039\_ALPHAALPHA\_CD8\_TCELL\_VS\_B1\_BCELL\_UP  
GSE3039\_ALPHAALPHA\_CD8\_TCELL\_VS\_B1\_BCELL\_UP  
152 -0.33942243 -1.4047511 0.017408123  
0.051560737 1 1919 "tags=26%, list=14%, signal=29%"  
GSE37301\_PRO\_BCELL\_VS\_GRANULOCYTE\_MONOCYTE\_PROGENITOR\_DN  
GSE37301\_PRO\_BCELL\_VS\_GRANULOCYTE\_MONOCYTE\_PROGENITOR\_DN  
139 -0.34064823 -1.4045113 0.022181146  
0.051646262 1 1270 "tags=23%, list=9%, signal=25%"  
GSE15930\_NAIVE\_VS\_72H\_IN\_VITRO\_STIM\_IFNAB\_CD8\_TCELL\_UP  
GSE15930\_NAIVE\_VS\_72H\_IN\_VITRO\_STIM\_IFNAB\_CD8\_TCELL\_UP  
156 -0.3378822 -1.4041125 0.018181818  
0.051791582 1 3210 "tags=31%, list=23%, signal=39%"  
GSE17186\_NAIVE\_VS\_CD21HIGH\_TRANSITIONAL\_BCELL\_CORD\_BLOOD\_DN  
GSE17186\_NAIVE\_VS\_CD21HIGH\_TRANSITIONAL\_BCELL\_CORD\_BLOOD\_DN  
133 -0.34729347 -1.4039086 0.021194605  
0.051834494 1 2170 "tags=29%, list=15%, signal=33%"  
GSE40666\_WT\_VS\_STAT1\_KO\_CD8\_TCELL\_UP  
GSE40666\_WT\_VS\_STAT1\_KO\_CD8\_TCELL\_UP  
143 -0.3439811 -1.4038177 0.022514071  
0.05180521 1 2152 "tags=31%, list=15%, signal=37%"  
GSE7460\_TCONV\_VS\_TREG\_THYMUS\_UP GSE7460\_TCONV\_VS\_TREG\_THYMUS\_UP  
148 -0.34373936 -1.4032303 0.013384321  
0.05205345 1 1858 "tags=26%, list=13%, signal=30%"  
GSE17301\_IFNA2\_VS\_IFNA2\_AND\_ACD3\_ACD28\_STIM\_CD8\_TCELL\_DN  
GSE17301\_IFNA2\_VS\_IFNA2\_AND\_ACD3\_ACD28\_STIM\_CD8\_TCELL\_DN  
143 -0.34218448 -1.4030936 0.014141414

0.052057277 1 1814 "tags=25%, list=13%, signal=29%"  
GSE37416\_CTRL\_VS\_0H\_F\_TULARENSIS\_LVS\_NEUTROPHIL\_DN  
GSE37416\_CTRL\_VS\_0H\_F\_TULARENSIS\_LVS\_NEUTROPHIL\_DN  
91 -0.3659198 -1.4029154 0.03364486  
0.05206383 1 1535 "tags=21%, list=11%, signal=23%"  
GSE29614\_DAY3\_VS\_DAY7\_TIV\_FLU\_VACCINE\_PBMC\_UP  
GSE29614\_DAY3\_VS\_DAY7\_TIV\_FLU\_VACCINE\_PBMC\_UP  
108 -0.3552803 -1.4027113 0.018050542  
0.052113228 1 5271 "tags=51%, list=37%, signal=81%"  
GSE22229\_UNTREATED\_VS\_IMMUNOSUPP\_THERAPY\_RENAL\_TRANSPLANT\_PATIENT\_PB  
MC\_UP  
GSE22229\_UNTREATED\_VS\_IMMUNOSUPP\_THERAPY\_RENAL\_TRANSPLANT\_PATIENT\_PB  
MC\_UP  
147 -0.34030217 -1.4022366  
0.009823183 0.052317675 1 3574 "tags=36%,  
list=25%, signal=48%"  
GSE16266\_CTRL\_VS\_LPS\_STIM\_MEF\_UP GSE16266\_CTRL\_VS\_LPS\_STIM\_MEF\_UP  
139 -0.34326664 -1.4011056 0.017578125  
0.052906796 1 1885 "tags=27%, list=13%, signal=30%"  
GSE23505\_UNTREATED\_VS\_4DAY\_IL6\_IL1\_IL23\_TREATED\_CD4\_TCELL\_DN  
GSE23505\_UNTREATED\_VS\_4DAY\_IL6\_IL1\_IL23\_TREATED\_CD4\_TCELL\_DN  
139 -0.33958516 -1.4010316 0.011131725  
0.05288845 1 1919 "tags=25%, list=14%, signal=29%"  
GSE22601\_DOUBLE\_POSITIVE\_VS\_CD4\_SINGLE\_POSITIVE\_THYMOCYTE\_UP  
GSE22601\_DOUBLE\_POSITIVE\_VS\_CD4\_SINGLE\_POSITIVE\_THYMOCYTE\_UP  
125 -0.34502026 -1.4005075 0.026923077  
0.053110678 1 2530 "tags=25%, list=18%, signal=30%"  
GSE7460\_CTRL\_VS\_FOXP3\_OVEREXPR\_TCONV\_1\_DN  
GSE7460\_CTRL\_VS\_FOXP3\_OVEREXPR\_TCONV\_1\_DN  
143 -0.33853567 -1.4004107 0.011257036  
0.053106874 1 3044 "tags=31%, list=22%, signal=39%"  
GSE37532\_VISCERAL\_ADIPOSE\_TISSUE\_VS\_LN\_DERIVED\_TCONV\_CD4\_TCELL\_DN  
GSE37532\_VISCERAL\_ADIPOSE\_TISSUE\_VS\_LN\_DERIVED\_TCONV\_CD4\_TCELL\_DN  
79 -0.37225145 -1.3997873 0.023121387  
0.053422213 1 6666 "tags=65%, list=47%, signal=122%"  
GSE20727\_CTRL\_VS\_H2O2\_TREATED\_DC\_UP  
GSE20727\_CTRL\_VS\_H2O2\_TREATED\_DC\_UP  
131 -0.34704214 -1.3986177 0.015564202  
0.05406328 1 1625 "tags=23%, list=12%, signal=26%"  
GSE13484\_UNSTIM\_VS\_YF17D\_VACCINE\_STIM\_PBMC\_DN  
GSE13484\_UNSTIM\_VS\_YF17D\_VACCINE\_STIM\_PBMC\_DN  
139 -0.3382477 -1.3975886 0.020560747  
0.05462396 1 1912 "tags=27%, list=14%, signal=30%"  
GSE15930\_NAIVE\_VS\_72H\_IN\_VITRO\_STIM\_TRICHOSTATINA\_CD8\_TCELL\_UP  
GSE15930\_NAIVE\_VS\_72H\_IN\_VITRO\_STIM\_TRICHOSTATINA\_CD8\_TCELL\_UP  
151 -0.33722562 -1.3965578 0.009276438  
0.05519145 1 3035 "tags=31%, list=22%, signal=39%"  
GSE21927\_SPLEEN\_C57BL6\_VS\_EL4\_TUMOR\_BALBC\_MONOCYTES\_UP  
GSE21927\_SPLEEN\_C57BL6\_VS\_EL4\_TUMOR\_BALBC\_MONOCYTES\_UP  
131 -0.34394348 -1.3965154 0.011904762  
0.055149373 1 1251 "tags=19%, list=9%, signal=21%"  
GSE24634\_TEFF\_VS\_TCONV\_DAY3\_IN\_CULTURE\_DN  
GSE24634\_TEFF\_VS\_TCONV\_DAY3\_IN\_CULTURE\_DN  
140 -0.33968723 -1.3962908 0.020599252  
0.05520458 1 2403 "tags=33%, list=17%, signal=39%"

|                                                                   |                                  |
|-------------------------------------------------------------------|----------------------------------|
| GSE557_WT_VS_I_AB_KO_DC_UP                                        | GSE557_WT_VS_I_AB_KO_DC_UP       |
| 137 -0.34084037                                                   | -1.3956683 0.014198783           |
| 0.05554931 1 2498                                                 | "tags=31%, list=18%, signal=37%" |
| GSE6674_CPG_VS_CPG_AND_ANTI_IGM_STIM_BCELL_DN                     |                                  |
| GSE6674_CPG_VS_CPG_AND_ANTI_IGM_STIM_BCELL_DN                     |                                  |
| 135 -0.3386008                                                    | -1.3950258 0.014760148           |
| 0.055886507 1 1887                                                | "tags=24%, list=13%, signal=27%" |
| GSE30971_WBP7_HET_VS_KO_MACROPHAGE_4H_LPS_STIM_DN                 |                                  |
| GSE30971_WBP7_HET_VS_KO_MACROPHAGE_4H_LPS_STIM_DN                 |                                  |
| 139 -0.34005034                                                   | -1.3947867 0.022944551           |
| 0.055943966 1 2152                                                | "tags=25%, list=15%, signal=29%" |
| GSE22886_DAY1_VS_DAY7_MONOCYTE_IN_CULTURE_UP                      |                                  |
| GSE22886_DAY1_VS_DAY7_MONOCYTE_IN_CULTURE_UP                      |                                  |
| 151 -0.3379749                                                    | -1.3946328 0.015267176           |
| 0.05596626 1 2648                                                 | "tags=29%, list=19%, signal=35%" |
| GSE29164_DAY3_VS_DAY7_CD8_TCELL_AND_IL12_TREATED_MELANOMA_UP      |                                  |
| GSE29164_DAY3_VS_DAY7_CD8_TCELL_AND_IL12_TREATED_MELANOMA_UP      |                                  |
| 148 -0.33616933                                                   | -1.3929447 0.015009381           |
| 0.056966327 1 2079                                                | "tags=29%, list=15%, signal=34%" |
| GSE16266_CTRL_VS_LPS_STIM_MEF_DN                                  | GSE16266_CTRL_VS_LPS_STIM_MEF_DN |
| 147 -0.33332872                                                   | -1.3925725 0.02504817            |
| 0.057127073 1 2468                                                | "tags=23%, list=17%, signal=28%" |
| GSE12392_WT_VS_IFNB_KO_CD8A_POS_SPLEEN_DC_DN                      |                                  |
| GSE12392_WT_VS_IFNB_KO_CD8A_POS_SPLEEN_DC_DN                      |                                  |
| 137 -0.34280774                                                   | -1.3923391 0.015717093           |
| 0.05719202 1 2254                                                 | "tags=25%, list=16%, signal=29%" |
| GSE15271_CXCR4_POS_VS_NEG_GC_BCELL_DN                             |                                  |
| GSE15271_CXCR4_POS_VS_NEG_GC_BCELL_DN                             |                                  |
| 130 -0.34052005                                                   | -1.3921616 0.016917294           |
| 0.057195615 1 1918                                                | "tags=27%, list=14%, signal=31%" |
| GSE40274_CTRL_VS_FOXP3_AND_GATA1_TRANSDUCE_ACTIVATED_CD4_TCELL_UP |                                  |
| GSE40274_CTRL_VS_FOXP3_AND_GATA1_TRANSDUCE_ACTIVATED_CD4_TCELL_UP |                                  |
| 117 -0.35359767                                                   | -1.3916835 0.024253732           |
| 0.057405848 1 1128                                                | "tags=18%, list=8%, signal=19%"  |
| GSE22886_NAIVE_VS_IGM_MEMORY_BCELL_UP                             |                                  |
| GSE22886_NAIVE_VS_IGM_MEMORY_BCELL_UP                             |                                  |
| 146 -0.33566606                                                   | -1.3912783 0.020522388           |
| 0.057606775 1 2394                                                | "tags=27%, list=17%, signal=32%" |
| GSE3982_BASOPHIL_VS_NKCELL_UP                                     | GSE3982_BASOPHIL_VS_NKCELL_UP    |
| 139 -0.33928975                                                   | -1.3909726 0.022813689           |
| 0.05775083 1 2475                                                 | "tags=27%, list=18%, signal=33%" |
| GSE22229_RENAL_TRANSPLANT_VS_HEALTHY_PBMC_DN                      |                                  |
| GSE22229_RENAL_TRANSPLANT_VS_HEALTHY_PBMC_DN                      |                                  |
| 143 -0.33376166                                                   | -1.390558 0.011695907            |
| 0.057933204 1 2844                                                | "tags=29%, list=20%, signal=36%" |
| GSE33425_CD161_INT_VS_NEG_CD8_TCELL_DN                            |                                  |
| GSE33425_CD161_INT_VS_NEG_CD8_TCELL_DN                            |                                  |
| 158 -0.33839634                                                   | -1.390461 0.015414258            |
| 0.057920408 1 2288                                                | "tags=30%, list=16%, signal=36%" |
| GSE42021_TCONV_PLN_VS_TREG_PRECURSORS_THYMUS_UP                   |                                  |
| GSE42021_TCONV_PLN_VS_TREG_PRECURSORS_THYMUS_UP                   |                                  |
| 146 -0.33617404                                                   | -1.3904556 0.030357143           |
| 0.057842072 1 2507                                                | "tags=29%, list=18%, signal=35%" |
| GSE1791_CTRL_VS_NEUROMEDINU_IN_T_CELL_LINE_6H_UP                  |                                  |

GSE1791\_CTRL\_VS\_NEUROMEDINU\_IN\_T\_CELL\_LINE\_6H\_UP  
141 -0.3373292 -1.3904444 0.01734104  
0.057767518 1 1426 "tags=21%, list=10%, signal=23%"  
GSE40273\_EOS\_KO\_VS\_WT\_TREG\_DN GSE40273\_EOS\_KO\_VS\_WT\_TREG\_DN  
139 -0.33892757 -1.3901637 0.020872865  
0.05787614 1 2006 "tags=31%, list=14%, signal=36%"  
GSE4984\_UNTREATED\_VS\_VEHICLE\_CTRL\_TREATED\_DC\_UP  
GSE4984\_UNTREATED\_VS\_VEHICLE\_CTRL\_TREATED\_DC\_UP  
123 -0.345767 -1.3901173 0.02946593  
0.05782557 1 2649 "tags=32%, list=19%, signal=39%"  
GSE20366\_TREG\_VS\_TCONV\_DN GSE20366\_TREG\_VS\_TCONV\_DN  
152 -0.33547205 -1.3896526 0.023941068  
0.0580484 1 1363 "tags=21%, list=10%, signal=23%"  
GSE369\_SOCS3\_KO\_VS\_WT\_LIVER\_POST\_IL6\_INJECTION\_UP  
GSE369\_SOCS3\_KO\_VS\_WT\_LIVER\_POST\_IL6\_INJECTION\_UP  
138 -0.34610817 -1.3896475 0.02734375  
0.05796924 1 1356 "tags=18%, list=10%, signal=20%"  
GSE6092\_IFNG\_VS\_IFNG\_AND\_B\_BURGDORFERI\_INF\_ENDOTHELIAL\_CELL\_UP  
GSE6092\_IFNG\_VS\_IFNG\_AND\_B\_BURGDORFERI\_INF\_ENDOTHELIAL\_CELL\_UP  
140 -0.3381321 -1.3893822 0.017274473  
0.058056433 1 2030 "tags=27%, list=14%, signal=31%"  
GSE1925\_CTRL\_VS\_IFNG\_PRIMED\_MACROPHAGE\_3H\_IFNG\_STIM\_UP  
GSE1925\_CTRL\_VS\_IFNG\_PRIMED\_MACROPHAGE\_3H\_IFNG\_STIM\_UP  
135 -0.3424309 -1.389325 0.021696253  
0.0580176 1 2518 "tags=30%, list=18%, signal=37%"  
GSE32986\_CURDLAN\_LOWDOSE\_VS\_CURDLAN\_HIGHDOSE\_STIM\_DC\_DN  
GSE32986\_CURDLAN\_LOWDOSE\_VS\_CURDLAN\_HIGHDOSE\_STIM\_DC\_DN  
161 -0.33641416 -1.3887707 0.015355086  
0.058322694 1 2962 "tags=33%, list=21%, signal=41%"  
GSE29618\_PRE\_VS\_DAY7\_FLU\_VACCINE\_MDC\_UP  
GSE29618\_PRE\_VS\_DAY7\_FLU\_VACCINE\_MDC\_UP  
134 -0.34129044 -1.3887086 0.014141414  
0.058278758 1 2410 "tags=22%, list=17%, signal=27%"  
GSE45365\_CTRL\_VS\_MCMV\_INFECTION\_NK\_CELL\_UP  
GSE45365\_CTRL\_VS\_MCMV\_INFECTION\_NK\_CELL\_UP  
143 -0.33911988 -1.3882154 0.007476636  
0.058495656 1 2385 "tags=26%, list=17%, signal=31%"  
GSE2706\_R848\_VS\_LPS\_8H\_STIM\_DC\_DN GSE2706\_R848\_VS\_LPS\_8H\_STIM\_DC\_DN  
122 -0.34439886 -1.3877944 0.013059702  
0.05869557 1 2081 "tags=28%, list=15%, signal=32%"  
GSE14699\_NAIVE\_VS\_ACT\_CD8\_TCELL\_UP  
GSE14699\_NAIVE\_VS\_ACT\_CD8\_TCELL\_UP  
148 -0.33594114 -1.3873967 0.015267176  
0.058886655 1 2080 "tags=28%, list=15%, signal=33%"  
GSE26351\_UNSTIM\_VS\_WNT\_PATHWAY\_STIM\_HEMATOPOIETIC\_PROGENITORS\_UP  
GSE26351\_UNSTIM\_VS\_WNT\_PATHWAY\_STIM\_HEMATOPOIETIC\_PROGENITORS\_UP  
129 -0.3420762 -1.3872902 0.026070764  
0.058868967 1 2931 "tags=29%, list=21%, signal=37%"  
GSE15330\_HSC\_VS\_GRANULOCYTE\_MONOCYTE\_PROGENITOR\_IKAROS\_KO\_UP  
GSE15330\_HSC\_VS\_GRANULOCYTE\_MONOCYTE\_PROGENITOR\_IKAROS\_KO\_UP  
155 -0.334699 -1.3862212 0.020446097  
0.05947288 1 1494 "tags=19%, list=11%, signal=21%"  
GSE13411\_NAIVE\_BCELL\_VS\_PLASMA\_CELL\_UP  
GSE13411\_NAIVE\_BCELL\_VS\_PLASMA\_CELL\_UP

130 -0.33939525 -1.3857026 0.026666667  
0.05974706 1 1578 "tags=20%, list=11%, signal=22%"  
GSE7768\_OVA\_ALONE\_VS\_OVA\_WITH\_MPL\_IMMUNIZED\_MOUSE\_WHOLE\_SPLEEN\_6H\_DN  
  
GSE7768\_OVA\_ALONE\_VS\_OVA\_WITH\_MPL\_IMMUNIZED\_MOUSE\_WHOLE\_SPLEEN\_6H\_DN  
128 -0.3390372 -1.3849725  
0.016161617 0.06014785 1 1367 "tags=20%,  
list=10%, signal=21%"  
GSE1460\_INTRATHYMIC\_T\_PROGENITOR\_VS\_NAIVE\_CD4\_TCELL\_CORD\_BLOOD\_DN  
GSE1460\_INTRATHYMIC\_T\_PROGENITOR\_VS\_NAIVE\_CD4\_TCELL\_CORD\_BLOOD\_DN  
145 -0.33543682 -1.384629 0.021072797  
0.06031033 1 1660 "tags=20%, list=12%, signal=22%"  
GSE19198\_1H\_VS\_6H\_IL21\_TREATED\_TCELL\_UP  
GSE19198\_1H\_VS\_6H\_IL21\_TREATED\_TCELL\_UP  
98 -0.35739478 -1.3839123 0.014787431  
0.06070108 1 3276 "tags=27%, list=23%, signal=34%"  
GSE7852\_THYMUS\_VS\_FAT\_TREG\_UP GSE7852\_THYMUS\_VS\_FAT\_TREG\_UP  
137 -0.34098658 -1.3830891 0.025242718  
0.06121087 1 1593 "tags=20%, list=11%, signal=22%"  
GSE13306\_LAMINA\_PROPRIA\_VS\_SPLEEN\_TREG\_UP  
GSE13306\_LAMINA\_PROPRIA\_VS\_SPLEEN\_TREG\_UP  
141 -0.33853906 -1.3830768 0.022304833  
0.06113245 1 1429 "tags=23%, list=10%, signal=25%"  
GSE8515\_IL1\_VS\_IL6\_4H\_STIM\_MAC\_UP GSE8515\_IL1\_VS\_IL6\_4H\_STIM\_MAC\_UP  
151 -0.33266577 -1.3820671 0.018691588  
0.061739862 1 1724 "tags=22%, list=12%, signal=25%"  
GSE40274\_IRF4\_VS\_FOXP3\_AND\_IRF4\_TRANSDUCED\_ACTIVATED\_CD4\_TCELL\_DN  
GSE40274\_IRF4\_VS\_FOXP3\_AND\_IRF4\_TRANSDUCED\_ACTIVATED\_CD4\_TCELL\_DN  
89 -0.36289027 -1.3817348 0.029906543  
0.061864045 1 3489 "tags=35%, list=25%, signal=46%"  
GSE45739\_UNSTIM\_VS\_ACD3\_ACD28\_STIM\_NRAS\_KO\_CD4\_TCELL\_UP  
GSE45739\_UNSTIM\_VS\_ACD3\_ACD28\_STIM\_NRAS\_KO\_CD4\_TCELL\_UP  
147 -0.33307126 -1.3817189 0.016161617  
0.06179201 1 1837 "tags=27%, list=13%, signal=30%"  
GSE40666\_STAT1\_KO\_VS\_STAT4\_KO\_CD8\_TCELL\_WITH\_IFNA\_STIM\_90MIN\_DN  
GSE40666\_STAT1\_KO\_VS\_STAT4\_KO\_CD8\_TCELL\_WITH\_IFNA\_STIM\_90MIN\_DN  
106 -0.3550012 -1.3813579 0.036608864  
0.061950594 1 3693 "tags=36%, list=26%, signal=48%"  
GSE360\_T\_GONDII\_VS\_B\_MALAYI\_HIGH\_DOSE\_DC\_UP  
GSE360\_T\_GONDII\_VS\_B\_MALAYI\_HIGH\_DOSE\_DC\_UP  
139 -0.33793122 -1.3812283 0.013157895  
0.061953258 1 1910 "tags=22%, list=14%, signal=26%"  
GSE3337\_CTRL\_VS\_4H\_IFNG\_IN\_CD8POS\_DC\_UP  
GSE3337\_CTRL\_VS\_4H\_IFNG\_IN\_CD8POS\_DC\_UP  
146 -0.33406538 -1.379890014 0.06280355 1  
1413 "tags=24%, list=10%, signal=26%"  
GSE45739\_NRAS\_KO\_VS\_WT\_UNSTIM\_CD4\_TCELL\_DN  
GSE45739\_NRAS\_KO\_VS\_WT\_UNSTIM\_CD4\_TCELL\_DN  
131 -0.34460053 -1.3798337 0.02919708  
0.06275935 1 2373 "tags=28%, list=17%, signal=34%"  
GSE17974\_0H\_VS\_0.5H\_IN\_VITRO\_ACT\_CD4\_TCELL\_DN  
GSE17974\_0H\_VS\_0.5H\_IN\_VITRO\_ACT\_CD4\_TCELL\_DN  
115 -0.34907237 -1.3796731 0.04032258  
0.06280686 1 2177 "tags=29%, list=15%, signal=34%"

GSE15659\_NAIVE\_VS\_PTPRC\_NEG\_CD4\_TCELL\_UP  
GSE15659\_NAIVE\_VS\_PTPRC\_NEG\_CD4\_TCELL\_UP  
107 -0.3475855 -1.3795513 0.028355388  
0.06282655 1 2067 "tags=21%, list=15%, signal=25%"  
GSE12845\_IGD\_POS\_BLOOD\_VS\_NAIVE\_TONSIL\_BCELL\_UP  
GSE12845\_IGD\_POS\_BLOOD\_VS\_NAIVE\_TONSIL\_BCELL\_UP  
121 -0.347001 -1.3794764 0.02264151  
0.06280207 1 827 "tags=16%, list=6%, signal=17%"  
GSE26495\_NAIVE\_VS\_PD1LOW\_CD8\_TCELL\_UP  
GSE26495\_NAIVE\_VS\_PD1LOW\_CD8\_TCELL\_UP  
111 -0.34837586 -1.3793185 0.028790787  
0.06282073 1 2156 "tags=23%, list=15%, signal=26%"  
GSE10147\_IL3\_VS\_IL3\_AND\_CPG\_STIM\_PDC\_DN  
GSE10147\_IL3\_VS\_IL3\_AND\_CPG\_STIM\_PDC\_DN  
124 -0.34225163 -1.3793004 0.026515152  
0.06274936 1 2592 "tags=27%, list=18%, signal=33%"  
GSE29949\_CD8\_NEG\_DC\_SPLEEN\_VS\_DC\_BRAIN\_DN  
GSE29949\_CD8\_NEG\_DC\_SPLEEN\_VS\_DC\_BRAIN\_DN  
145 -0.32955557 -1.379173 0.02534113  
0.06274874 1 1797 "tags=23%, list=13%, signal=26%"  
GSE44649\_WT\_VS\_MIR155\_KO\_NAIVE\_CD8\_TCELL\_DN  
GSE44649\_WT\_VS\_MIR155\_KO\_NAIVE\_CD8\_TCELL\_DN  
137 -0.33628103 -1.3790838 0.029906543  
0.06272996 1 2035 "tags=25%, list=14%, signal=29%"  
GSE27786\_LSK\_VS\_LIN\_NEG\_CELL\_UP GSE27786\_LSK\_VS\_LIN\_NEG\_CELL\_UP  
148 -0.33393064 -1.3790776 0.013539651  
0.06265 1 1555 "tags=24%, list=11%, signal=26%"  
GSE6875\_TCONV\_VS\_TREG\_UP GSE6875\_TCONV\_VS\_TREG\_UP  
147 -0.33428124 -1.3790543 0.018656716  
0.062588334 1 2826 "tags=31%, list=20%, signal=39%"  
GSE369\_IFNG\_KO\_VS\_WT\_LIVER\_UP GSE369\_IFNG\_KO\_VS\_WT\_LIVER\_UP  
139 -0.3338506 -1.378791 0.020872865  
0.06266712 1 1616 "tags=24%, list=11%, signal=27%"  
GSE26890\_CXCR1\_NEG\_VS\_POS\_EFFECTOR\_CD8\_TCELL\_UP  
GSE26890\_CXCR1\_NEG\_VS\_POS\_EFFECTOR\_CD8\_TCELL\_UP  
131 -0.33742723 -1.3783417 0.026768642  
0.0628891 1 2163 "tags=30%, list=15%, signal=35%"  
GSE13173\_UNTREATED\_VS\_IL12\_TREATED\_ACT\_CD8\_TCELL\_DN  
GSE13173\_UNTREATED\_VS\_IL12\_TREATED\_ACT\_CD8\_TCELL\_DN  
107 -0.35362226 -1.3767152 0.03305785  
0.06387838 1 2856 "tags=35%, list=20%, signal=43%"  
GSE14308\_NAIVE\_CD4\_TCELL\_VS\_NATURAL\_TREG\_DN  
GSE14308\_NAIVE\_CD4\_TCELL\_VS\_NATURAL\_TREG\_DN  
134 -0.33788857 -1.3762252 0.017110266  
0.06413805 1 1759 "tags=25%, list=12%, signal=28%"  
GSE18791\_CTRL\_VS\_NEWCASTLE\_VIRUS\_DC\_14H\_DN  
GSE18791\_CTRL\_VS\_NEWCASTLE\_VIRUS\_DC\_14H\_DN  
117 -0.34342086 -1.375952 0.0227704  
0.06425589 1 2377 "tags=24%, list=17%, signal=29%"  
GSE3982 EFF\_MEMORY\_CD4\_TCELL\_VS\_NKCELL\_DN  
GSE3982 EFF\_MEMORY\_CD4\_TCELL\_VS\_NKCELL\_DN  
135 -0.3378896 -1.3738575 0.02504817  
0.065689854 1 1938 "tags=21%, list=14%, signal=25%"  
GSE4748\_CTRL\_VS\_CYANOBACTERIUM\_LP SLIKE\_STIM\_DC\_3H\_UP

GSE4748\_CTRL\_VS\_CYANOBACTERIUM\_LP SLIKE\_STIM\_DC\_3H\_UP  
133 -0.34132734 -1.373805 0.017475728  
0.0656482 1 2122 "tags=28%, list=15%, signal=32%"  
GSE3982\_BASOPHIL\_VS\_TH2\_UP GSE3982\_BASOPHIL\_VS\_TH2\_UP  
130 -0.3332055 -1.3736064 0.02385686  
0.06570428 1 2481 "tags=27%, list=18%, signal=32%"  
GSE20715\_0H\_VS\_48H\_OZONE\_TLR4\_KO\_LUNG\_UP  
GSE20715\_0H\_VS\_48H\_OZONE\_TLR4\_KO\_LUNG\_UP  
166 -0.33113247 -1.3736047 0.014760148  
0.065618046 1 2583 "tags=27%, list=18%, signal=32%"  
GSE6092\_B\_BURGDOFERI\_VS\_B\_BURGDORFERI\_AND\_IFNG\_STIM\_ENDOTHELIAL\_CELL  
\_UP  
GSE6092\_B\_BURGDOFERI\_VS\_B\_BURGDORFERI\_AND\_IFNG\_STIM\_ENDOTHELIAL\_CELL  
\_UP  
137 -0.33695415 -1.3732721  
0.027726432 0.06579477 1 2087 "tags=27%,  
list=15%, signal=31%"  
GSE23321\_CENTRAL\_MEMORY\_VS\_NAIVE\_CD8\_TCELL\_UP  
GSE23321\_CENTRAL\_MEMORY\_VS\_NAIVE\_CD8\_TCELL\_UP  
160 -0.32708675 -1.3729998 0.012448133  
0.065895244 1 2214 "tags=28%, list=16%, signal=33%"  
GSE16697\_CD4\_TCELL\_VS\_TFH\_CD4\_TCELL\_DN  
GSE16697\_CD4\_TCELL\_VS\_TFH\_CD4\_TCELL\_DN  
150 -0.33210006 -1.3729975 0.017110266  
0.06580796 1 1052 "tags=20%, list=7%, signal=21%"  
GSE25123\_CTRL\_VS\_IL4\_STIM\_MACROPHAGE\_DN  
GSE25123\_CTRL\_VS\_IL4\_STIM\_MACROPHAGE\_DN  
132 -0.33714667 -1.3726869 0.028846154  
0.06593131 1 1769 "tags=22%, list=13%, signal=25%"  
GSE3994\_WT\_VS\_PAC1\_KO\_ACTIVATED\_MAST\_CELL\_UP  
GSE3994\_WT\_VS\_PAC1\_KO\_ACTIVATED\_MAST\_CELL\_UP  
153 -0.3273305 -1.3724318 0.020599252  
0.066022106 1 2693 "tags=23%, list=19%, signal=28%"  
GSE17721\_CTRL\_VS\_LPS\_1H\_BMDC\_DN GSE17721\_CTRL\_VS\_LPS\_1H\_BMDC\_DN  
157 -0.32988983 -1.3724083 0.016513761  
0.06595611 1 1910 "tags=20%, list=14%, signal=23%"  
GSE36826\_WT\_VS\_IL1R\_KO\_SKIN\_UP GSE36826\_WT\_VS\_IL1R\_KO\_SKIN\_UP  
137 -0.33745074 -1.3723115 0.021484375  
0.065931186 1 2120 "tags=26%, list=15%, signal=31%"  
GSE13306\_RA\_VS\_UNTREATED\_MEM\_CD4\_TCELL\_UP  
GSE13306\_RA\_VS\_UNTREATED\_MEM\_CD4\_TCELL\_UP  
142 -0.33594278 -1.3719822 0.018484289  
0.066064335 1 2163 "tags=27%, list=15%, signal=32%"  
GSE24210\_CTRL\_VS\_IL35\_TREATED\_TCONV\_CD4\_TCELL\_UP  
GSE24210\_CTRL\_VS\_IL35\_TREATED\_TCONV\_CD4\_TCELL\_UP  
146 -0.33024165 -1.371661 0.024809161  
0.066217385 1 1139 "tags=20%, list=8%, signal=21%"  
GSE9006\_HEALTHY\_VS\_TYPE\_1\_DIABETES\_PBMC\_1MONTH\_POST\_DX\_DN  
GSE9006\_HEALTHY\_VS\_TYPE\_1\_DIABETES\_PBMC\_1MONTH\_POST\_DX\_DN  
129 -0.33784512 -1.3714085 0.026369167  
0.06631269 1 1737 "tags=20%, list=12%, signal=23%"  
GSE9946\_IMMATURE\_VS\_LISTERIA\_INF\_MATURE\_DC\_DN  
GSE9946\_IMMATURE\_VS\_LISTERIA\_INF\_MATURE\_DC\_DN  
101 -0.352971 -1.3709166 0.048449613  
0.0666118 1 2607 "tags=29%, list=18%, signal=35%"

GSE37301\_HEMATOPOIETIC\_STEM\_CELL\_VS\_PRO\_BCELL\_DN  
GSE37301\_HEMATOPOIETIC\_STEM\_CELL\_VS\_PRO\_BCELL\_DN  
124 -0.33937064 -1.3708513 0.026515152 0.066583  
1 1099 "tags=18%, list=8%, signal=19%"  
GSE3982\_EOSINOPHIL\_VS\_TH2\_UP GSE3982\_EOSINOPHIL\_VS\_TH2\_UP  
137 -0.33682886 -1.3707452 0.021113243  
0.06658183 1 2491 "tags=24%, list=18%, signal=29%"  
GSE22935\_UNSTIM\_VS\_24H\_MBOVIS\_BCG\_STIM\_MYD88\_KO\_MACROPHAGE\_UP  
GSE22935\_UNSTIM\_VS\_24H\_MBOVIS\_BCG\_STIM\_MYD88\_KO\_MACROPHAGE\_UP  
149 -0.3322963 -1.3696493 0.017208412  
0.06729505 1 1299 "tags=22%, list=9%, signal=24%"  
GSE43955\_TH0\_VS\_TGFB\_IL6\_TH17\_ACT\_CD4\_TCELL\_52H\_UP  
GSE43955\_TH0\_VS\_TGFB\_IL6\_TH17\_ACT\_CD4\_TCELL\_52H\_UP  
169 -0.32364118 -1.369157 0.017045455  
0.06758335 1 1852 "tags=22%, list=13%, signal=26%"  
GSE43955\_1H\_VS\_60H\_ACT\_CD4\_TCELL\_WITH\_TGFB\_IL6\_DN  
GSE43955\_1H\_VS\_60H\_ACT\_CD4\_TCELL\_WITH\_TGFB\_IL6\_DN  
155 -0.32922453 -1.3687468 0.03076923  
0.06778475 1 1851 "tags=19%, list=13%, signal=21%"  
GSE16450\_IMMATURE\_VS\_MATURE\_NEURON\_CELL\_LINE\_12H\_IFNA\_STIM\_UP  
GSE16450\_IMMATURE\_VS\_MATURE\_NEURON\_CELL\_LINE\_12H\_IFNA\_STIM\_UP  
153 -0.3282449 -1.3673035 0.023210831  
0.06874019 1 2629 "tags=35%, list=19%, signal=43%"  
GSE37301\_COMMON\_LYMPHOID\_PROGENITOR\_VS\_RAG2\_KO\_NK\_CELL\_DN  
GSE37301\_COMMON\_LYMPHOID\_PROGENITOR\_VS\_RAG2\_KO\_NK\_CELL\_DN  
137 -0.33365992 -1.366893 0.03448276  
0.06894894 1 2506 "tags=28%, list=18%, signal=33%"  
GSE27241\_CTRL\_VS\_DIGOXIN\_TREATED\_RORGT\_KO\_CD4\_TCELL\_IN\_TH17\_POLARIZI  
NG\_CONDITIONS\_DN  
GSE27241\_CTRL\_VS\_DIGOXIN\_TREATED\_RORGT\_KO\_CD4\_TCELL\_IN\_TH17\_POLARIZI  
NG\_CONDITIONS\_DN  
139 -0.33370885 -1.3665588  
0.02020202 0.0691239 1 2167 "tags=27%,  
list=15%, signal=31%"  
GSE5589\_WT\_VS\_IL6\_KO\_LPS\_AND\_IL10\_STIM\_MACROPHAGE\_180MIN\_UP  
GSE5589\_WT\_VS\_IL6\_KO\_LPS\_AND\_IL10\_STIM\_MACROPHAGE\_180MIN\_UP  
76 -0.36455992 -1.3660924 0.053333335  
0.069374114 1 1647 "tags=17%, list=12%, signal=19%"  
GSE13485\_DAY1\_VS\_DAY7\_YF17D\_VACCINE\_PBMC\_UP  
GSE13485\_DAY1\_VS\_DAY7\_YF17D\_VACCINE\_PBMC\_UP  
108 -0.34121013 -1.3657607 0.04288499  
0.06955868 1 4870 "tags=41%, list=35%, signal=62%"  
GOLDRATH\_NAIVE\_VS\_MEMORY\_CD8\_TCELL\_UP  
GOLDRATH\_NAIVE\_VS\_MEMORY\_CD8\_TCELL\_UP  
156 -0.32526916 -1.3657315 0.014953272  
0.06948847 1 1776 "tags=27%, list=13%, signal=30%"  
GSE29617\_CTRL\_VS\_TIV\_FLU\_VACCINE\_PBMC\_2008\_UP  
GSE29617\_CTRL\_VS\_TIV\_FLU\_VACCINE\_PBMC\_2008\_UP  
115 -0.34414232 -1.3644235 0.02443609  
0.07036314 1 3866 "tags=43%, list=27%, signal=58%"  
GSE23505\_IL6\_IL1\_VS\_IL6\_IL1\_IL23\_TREATED\_CD4\_TCELL\_DN  
GSE23505\_IL6\_IL1\_VS\_IL6\_IL1\_IL23\_TREATED\_CD4\_TCELL\_DN  
149 -0.32410327 -1.3637096 0.015779093  
0.07083572 1 2368 "tags=29%, list=17%, signal=34%"  
GSE41867\_NAIVE\_VS\_DAY8\_LCMV\_EFFECTOR\_CD8\_TCELL\_DN



GSE41867\_NAIVE\_VS\_DAY8\_LCMV\_EFFECTOR\_CD8\_TCELL\_DN  
136 -0.3307504 -1.361953 0.02734375  
0.072009355 1 1660 "tags=24%, list=12%, signal=27%"  
GSE5542\_IFNG\_VS\_IFNA\_TREATED\_EPITHELIAL\_CELLS\_6H\_DN  
GSE5542\_IFNG\_VS\_IFNA\_TREATED\_EPITHELIAL\_CELLS\_6H\_DN  
137 -0.33203843 -1.3607789 0.026119404  
0.0727845 1 823 "tags=14%, list=6%, signal=15%"  
GSE11961\_MEMORY\_BCELL\_DAY40\_VS\_GERMINAL\_CENTER\_BCELL\_DAY40\_DN  
GSE11961\_MEMORY\_BCELL\_DAY40\_VS\_GERMINAL\_CENTER\_BCELL\_DAY40\_DN  
137 -0.33226076 -1.3605698 0.035916824  
0.0728519 1 2359 "tags=24%, list=17%, signal=29%"  
GSE32986\_UNSTIM\_VS\_GMCSF\_AND\_CURDLAN\_HIGHDOSE\_STIM\_DC\_DN  
GSE32986\_UNSTIM\_VS\_GMCSF\_AND\_CURDLAN\_HIGHDOSE\_STIM\_DC\_DN  
116 -0.3395405 -1.3602078 0.03499079  
0.07303683 1 1216 "tags=18%, list=9%, signal=20%"  
GSE42724\_MEMORY\_BCELL\_VS\_PLASMABLAST\_UP  
GSE42724\_MEMORY\_BCELL\_VS\_PLASMABLAST\_UP  
158 -0.32756126 -1.3601718 0.0295858  
0.07297886 1 1856 "tags=23%, list=13%, signal=26%"  
GSE29618\_PRE\_VS\_DAY7\_POST\_LAIV\_FLU\_VACCINE\_MDC\_DN  
GSE29618\_PRE\_VS\_DAY7\_POST\_LAIV\_FLU\_VACCINE\_MDC\_DN  
134 -0.33304316 -1.3599685 0.032608695  
0.0730674 1 2664 "tags=31%, list=19%, signal=38%"  
GSE3691\_CONVENTIONAL\_VS\_PLASMACYTOID\_DC\_SPLEEN\_UP  
GSE3691\_CONVENTIONAL\_VS\_PLASMACYTOID\_DC\_SPLEEN\_UP  
146 -0.32977518 -1.3598171 0.013539651  
0.0730793 1 1187 "tags=16%, list=8%, signal=17%"  
GSE34006\_A2AR\_KO\_VS\_A2AR\_AGONIST\_TREATED\_TREG\_UP  
GSE34006\_A2AR\_KO\_VS\_A2AR\_AGONIST\_TREATED\_TREG\_UP  
146 -0.32229784 -1.3596056 0.02457467  
0.07315706 1 2790 "tags=34%, list=20%, signal=41%"  
GSE9878\_CTRL\_VS\_EBF\_TRANSNUCED\_PAX5\_KO\_PRO\_BCELL\_UP  
GSE9878\_CTRL\_VS\_EBF\_TRANSNUCED\_PAX5\_KO\_PRO\_BCELL\_UP  
149 -0.326276 -1.3585081 0.040229887  
0.073911056 1 1413 "tags=21%, list=10%, signal=23%"  
GSE13493\_DP\_VS\_CD4INTCD8POS\_THYMOCYTE\_UP  
GSE13493\_DP\_VS\_CD4INTCD8POS\_THYMOCYTE\_UP  
138 -0.329724 -1.3581988 0.026515152  
0.07409296 1 1694 "tags=22%, list=12%, signal=24%"  
GSE3982\_CTRL\_VS\_LPS\_48H\_DC\_DN GSE3982\_CTRL\_VS\_LPS\_48H\_DC\_DN  
146 -0.32707295 -1.358112 0.02  
0.07407449 1 1457 "tags=22%, list=10%, signal=24%"  
GSE2405\_S\_AUREUS\_VS\_A\_PHAGOCYTOPHILUM\_NEUTROPHIL\_DN  
GSE2405\_S\_AUREUS\_VS\_A\_PHAGOCYTOPHILUM\_NEUTROPHIL\_DN  
140 -0.3333784 -1.3576816 0.023166023  
0.074332796 1 3035 "tags=33%, list=22%, signal=41%"  
GSE36888\_UNTREATED\_VS\_IL2\_TREATED\_TCELL\_6H\_UP  
GSE36888\_UNTREATED\_VS\_IL2\_TREATED\_TCELL\_6H\_UP  
129 -0.33733347 -1.3563557 0.032319393  
0.0752962 1 2097 "tags=30%, list=15%, signal=35%"  
GSE22611\_NOD2\_TRANSNUCED\_VS\_CTRL\_TRANSNUCED\_HEK293\_MDP\_STIM\_2H\_UP  
GSE22611\_NOD2\_TRANSNUCED\_VS\_CTRL\_TRANSNUCED\_HEK293\_MDP\_STIM\_2H\_UP  
129 -0.3368325 -1.3559738 0.029850746  
0.075486824 1 2264 "tags=21%, list=16%, signal=25%"

GSE41176\_UNSTIM\_VS\_ANTI\_IGM\_STIM\_BCELL\_6H\_DN  
GSE41176\_UNSTIM\_VS\_ANTI\_IGM\_STIM\_BCELL\_6H\_DN  
164 -0.31961262 -1.3558834 0.017578125  
0.07547222 1 1452 "tags=19%, list=10%, signal=21%"  
GSE25088\_CTRL\_VS\_IL4\_AND\_ROSIGLITAZONE\_STIM\_MACROPHAGE\_UP  
GSE25088\_CTRL\_VS\_IL4\_AND\_ROSIGLITAZONE\_STIM\_MACROPHAGE\_UP  
141 -0.33033034 -1.3554124 0.02745098  
0.0757699 1 1507 "tags=21%, list=11%, signal=24%"  
GSE16385\_ROSIGLITAZONE\_IL4\_VS\_IL4\_ALONE\_STIM\_MACROPHAGE\_12H\_DN  
GSE16385\_ROSIGLITAZONE\_IL4\_VS\_IL4\_ALONE\_STIM\_MACROPHAGE\_12H\_DN  
149 -0.32873422 -1.3553934 0.02471483  
0.07568915 1 1977 "tags=23%, list=14%, signal=27%"  
GSE40274\_FOXP3\_VS\_FOXP3\_AND\_IRF4\_TRANSDUCED\_ACTIVATED\_CD4\_TCELL\_UP  
GSE40274\_FOXP3\_VS\_FOXP3\_AND\_IRF4\_TRANSDUCED\_ACTIVATED\_CD4\_TCELL\_UP  
144 -0.33010486 -1.3553576 0.020912547  
0.07562347 1 1274 "tags=23%, list=9%, signal=25%"  
GSE12003\_4D\_VS\_8D\_CULTURE\_BM\_PROGENITOR\_UP  
GSE12003\_4D\_VS\_8D\_CULTURE\_BM\_PROGENITOR\_UP  
126 -0.3363361 -1.3545009 0.024242423  
0.07620021 1 1827 "tags=24%, list=13%, signal=27%"  
GSE411\_100MIN\_VS\_400MIN\_IL6\_STIM\_MACROPHAGE\_UP  
GSE411\_100MIN\_VS\_400MIN\_IL6\_STIM\_MACROPHAGE\_UP  
142 -0.32871926 -1.3539578 0.034883723  
0.076575555 1 1600 "tags=24%, list=11%, signal=27%"  
GSE29949\_MICROGLIA\_VS\_DC\_BRAIN\_DN GSE29949\_MICROGLIA\_VS\_DC\_BRAIN\_DN  
148 -0.32842246 -1.353636 0.029354207  
0.07675834 1 3381 "tags=30%, list=24%, signal=39%"  
GSE22935\_24H\_VS\_48H\_MBOVIS\_BCG\_STIM\_MACROPHAGE\_UP  
GSE22935\_24H\_VS\_48H\_MBOVIS\_BCG\_STIM\_MACROPHAGE\_UP  
131 -0.3330339 -1.3529749 0.03358209  
0.07721063 1 2491 "tags=24%, list=18%, signal=29%"  
GSE10325\_MYELOID\_VS\_LUPUS\_MYELOID\_UP  
GSE10325\_MYELOID\_VS\_LUPUS\_MYELOID\_UP  
138 -0.3258486 -1.3521364 0.027881041  
0.07778831 1 4668 "tags=39%, list=33%, signal=58%"  
GSE9006\_HEALTHY\_VS\_TYPE\_2\_DIABETES\_PBMC\_AT\_DX\_DN  
GSE9006\_HEALTHY\_VS\_TYPE\_2\_DIABETES\_PBMC\_AT\_DX\_DN  
144 -0.32821205 -1.3520273 0.01775148  
0.07776141 1 1741 "tags=21%, list=12%, signal=24%"  
GSE26030\_UNSTIM\_VS\_RESTIM\_TH17\_DAY5\_POST\_POLARIZATION\_UP  
GSE26030\_UNSTIM\_VS\_RESTIM\_TH17\_DAY5\_POST\_POLARIZATION\_UP  
145 -0.3302312 -1.3518531 0.013513514  
0.07780653 1 2419 "tags=32%, list=17%, signal=39%"  
GSE3203\_INFLUENZA\_INF\_VS\_IFNB\_TREATED\_LN\_BCELL\_DN  
GSE3203\_INFLUENZA\_INF\_VS\_IFNB\_TREATED\_LN\_BCELL\_DN  
144 -0.32832295 -1.3516482 0.0332681  
0.0778724 1 2067 "tags=26%, list=15%, signal=31%"  
GSE22025\_UNTREATED\_VS\_TGFB1\_TREATED\_CD4\_TCELL\_UP  
GSE22025\_UNTREATED\_VS\_TGFB1\_TREATED\_CD4\_TCELL\_UP  
144 -0.33031833 -1.3513831 0.030241935  
0.07799462 1 1895 "tags=22%, list=13%, signal=25%"  
GSE37532\_TREG\_VS\_TCONV\_CD4\_TCELL\_FROM\_VISCERAL\_ADIPOSE\_TISSUE\_UP  
GSE37532\_TREG\_VS\_TCONV\_CD4\_TCELL\_FROM\_VISCERAL\_ADIPOSE\_TISSUE\_UP  
98 -0.34272265 -1.3503857 0.044660196

|                                                                                         |             |            |                                  |
|-----------------------------------------------------------------------------------------|-------------|------------|----------------------------------|
| 0.07867402                                                                              | 1           | 4091       | "tags=30%, list=29%, signal=41%" |
| GSE27241_WT_CTRL_VS_DIGOXIN_TREATED_RORGT_KO_CD4_TCELL_IN_TH17_POLARIZING_CONDITIONS_UP |             |            |                                  |
| GSE27241_WT_CTRL_VS_DIGOXIN_TREATED_RORGT_KO_CD4_TCELL_IN_TH17_POLARIZING_CONDITIONS_UP |             |            |                                  |
| 136                                                                                     | -0.32704455 | -1.3501897 | 0.039138943                      |
| 0.07872808                                                                              | 1           | 2588       | "tags=26%, list=18%, signal=31%" |
| GSE22886_NAIVE_BCELL_VS_DC_UP                                                           |             |            |                                  |
| 115                                                                                     | -0.33680034 | -1.3497995 | 0.037037037                      |
| 0.07894052                                                                              | 1           | 2264       | "tags=24%, list=16%, signal=29%" |
| GSE42724_MEMORY_VS_B1_BCELL_DN                                                          |             |            |                                  |
| 132                                                                                     | -0.33422044 | -1.3497225 | 0.035714287                      |
| 0.07890957                                                                              | 1           | 2254       | "tags=28%, list=16%, signal=33%" |
| GSE7831_CPG_VS_INFLUENZA_STIM_PDC_1H_DN                                                 |             |            |                                  |
| GSE7831_CPG_VS_INFLUENZA_STIM_PDC_1H_DN                                                 |             |            |                                  |
| 162                                                                                     | -0.32135686 | -1.3492802 | 0.023255814                      |
| 0.07917002                                                                              | 1           | 2180       | "tags=23%, list=15%, signal=27%" |
| GSE37416_0H_VS_12H_F_TULARENSIS_LVS_NEUTROPHIL_DN                                       |             |            |                                  |
| GSE37416_0H_VS_12H_F_TULARENSIS_LVS_NEUTROPHIL_DN                                       |             |            |                                  |
| 150                                                                                     | -0.3241756  | -1.3489507 | 0.035650622                      |
| 0.07934074                                                                              | 1           | 1283       | "tags=21%, list=9%, signal=23%"  |
| GSE360_HIGH_DOSE_B_MALAYI_VS_M_TUBERCULOSIS_DC_DN                                       |             |            |                                  |
| GSE360_HIGH_DOSE_B_MALAYI_VS_M_TUBERCULOSIS_DC_DN                                       |             |            |                                  |
| 146                                                                                     | -0.32449096 | -1.348889  | 0.029411765                      |
| 0.07928733                                                                              | 1           | 1116       | "tags=18%, list=8%, signal=19%"  |
| GSE7400_CTRL_VS_CSF3_IN_VIVO_TREATED_PBMC_UP                                            |             |            |                                  |
| GSE7400_CTRL_VS_CSF3_IN_VIVO_TREATED_PBMC_UP                                            |             |            |                                  |
| 132                                                                                     | -0.32688603 | -1.3475524 | 0.020833334                      |
| 0.08026877                                                                              | 1           | 2596       | "tags=24%, list=18%, signal=29%" |
| GSE31082_DN_VS_CD4_SP_THYMOCYTE_DN                                                      |             |            |                                  |
| GSE31082_DN_VS_CD4_SP_THYMOCYTE_DN                                                      |             |            |                                  |
| 138                                                                                     | -0.33511484 | -1.3474523 | 0.017441861                      |
| 0.08025277                                                                              | 1           | 1546       | "tags=26%, list=11%, signal=29%" |
| GSE44649_WT_VS_MIR155_KO_ACTIVATED_CD8_TCELL_DN                                         |             |            |                                  |
| GSE44649_WT_VS_MIR155_KO_ACTIVATED_CD8_TCELL_DN                                         |             |            |                                  |
| 138                                                                                     | -0.3317793  | -1.347445  | 0.027290449                      |
| 0.080161296                                                                             | 1           | 2213       | "tags=31%, list=16%, signal=37%" |
| GSE9037_CTRL_VS_LPS_4H_STIM_BMDM_DN                                                     |             |            |                                  |
| GSE9037_CTRL_VS_LPS_4H_STIM_BMDM_DN                                                     |             |            |                                  |
| 133                                                                                     | -0.32698584 | -1.3465677 | 0.027131783                      |
| 0.08074959                                                                              | 1           | 1347       | "tags=17%, list=10%, signal=19%" |
| GSE37301_COMMON_LYMPHOID_PROGENITOR_VS_PRO_BCELL_UP                                     |             |            |                                  |
| GSE37301_COMMON_LYMPHOID_PROGENITOR_VS_PRO_BCELL_UP                                     |             |            |                                  |
| 142                                                                                     | -0.3219318  | -1.3464531 | 0.0332681                        |
| 0.08073303                                                                              | 1           | 1460       | "tags=18%, list=10%, signal=19%" |
| GSE22025_UNTREATED_VS_PROGESTERONE_TREATED_CD4_TCELL_DN                                 |             |            |                                  |
| GSE22025_UNTREATED_VS_PROGESTERONE_TREATED_CD4_TCELL_DN                                 |             |            |                                  |
| 141                                                                                     | -0.3303309  | -1.3462765 | 0.01981982                       |
| 0.08077764                                                                              | 1           | 1583       | "tags=20%, list=11%, signal=22%" |
| GSE15624_3H_VS_6H_HALOFUGINONE_TREATED_CD4_TCELL_UP                                     |             |            |                                  |
| GSE15624_3H_VS_6H_HALOFUGINONE_TREATED_CD4_TCELL_UP                                     |             |            |                                  |
| 132                                                                                     | -0.33269995 | -1.3460944 | 0.020952381                      |
| 0.08083351                                                                              | 1           | 1063       | "tags=20%, list=8%, signal=22%"  |
| GSE22886_NAIVE_CD4_TCELL_VS_DC_UP                                                       |             |            |                                  |
| GSE22886_NAIVE_CD4_TCELL_VS_DC_UP                                                       |             |            |                                  |

|                                                                   |             |            |                                  |
|-------------------------------------------------------------------|-------------|------------|----------------------------------|
| 138                                                               | -0.3325266  | -1.345823  | 0.03358209                       |
| 0.08098286                                                        | 1           | 657        | "tags=15%, list=5%, signal=16%"  |
| GSE23925_LIGHT_ZONE_VS_NAIVE_BCELL_DN                             |             |            |                                  |
| GSE23925_LIGHT_ZONE_VS_NAIVE_BCELL_DN                             |             |            |                                  |
| 143                                                               | -0.3300071  | -1.3456762 | 0.03358209                       |
| 0.0810061                                                         | 1           | 1437       | "tags=21%, list=10%, signal=23%" |
| GSE7831_1H_VS_4H_INFLUENZA_STIM_PDC_UP                            |             |            |                                  |
| GSE7831_1H_VS_4H_INFLUENZA_STIM_PDC_UP                            |             |            |                                  |
| 159                                                               | -0.32187718 | -1.3455491 | 0.026070764                      |
| 0.0810173                                                         | 1           | 2118       | "tags=26%, list=15%, signal=30%" |
| GSE9988_LPS_VS_LPS_AND_ANTI_TREM1_MONOCYTE_UP                     |             |            |                                  |
| GSE9988_LPS_VS_LPS_AND_ANTI_TREM1_MONOCYTE_UP                     |             |            |                                  |
| 150                                                               | -0.31977898 | -1.3447889 | 0.02357564                       |
| 0.08154727                                                        | 1           | 2508       | "tags=29%, list=18%, signal=34%" |
| GSE29164_UNTREATED_VS_CD8_TCELL_TREATED_MELANOMA_DAY3_DN          |             |            |                                  |
| GSE29164_UNTREATED_VS_CD8_TCELL_TREATED_MELANOMA_DAY3_DN          |             |            |                                  |
| 147                                                               | -0.32426757 | -1.3446641 | 0.03846154                       |
| 0.08154458                                                        | 1           | 1409       | "tags=20%, list=10%, signal=22%" |
| GSE40274_FOXP3_VS_FOXP3_AND_LEF1_TRANSDUCE_ACTIVATED_CD4_TCELL_UP |             |            |                                  |
| GSE40274_FOXP3_VS_FOXP3_AND_LEF1_TRANSDUCE_ACTIVATED_CD4_TCELL_UP |             |            |                                  |
| 146                                                               | -0.32612464 | -1.3440647 | 0.024299065                      |
| 0.08194377                                                        | 1           | 1704       | "tags=27%, list=12%, signal=31%" |
| GSE15330_HSC_VS_MEGAKARYOCYTE_ERYTHROID_PROGENITOR_IKAROS_KO_DN   |             |            |                                  |
| GSE15330_HSC_VS_MEGAKARYOCYTE_ERYTHROID_PROGENITOR_IKAROS_KO_DN   |             |            |                                  |
| 150                                                               | -0.3282676  | -1.3438857 | 0.029684601                      |
| 0.08200055                                                        | 1           | 977        | "tags=13%, list=7%, signal=13%"  |
| GSE11818_WT_VS_DICER_KO_TREG_DN                                   |             |            |                                  |
| GSE11818_WT_VS_DICER_KO_TREG_DN                                   |             |            |                                  |
| 120                                                               | -0.33319998 | -1.3429075 | 0.05263158                       |
| 0.082742475                                                       | 1           | 1749       | "tags=23%, list=12%, signal=25%" |
| GSE9006_1MONTH_VS_4MONTH_POST_TYPE_1_DIABETES_DX_PPMC_UP          |             |            |                                  |
| GSE9006_1MONTH_VS_4MONTH_POST_TYPE_1_DIABETES_DX_PPMC_UP          |             |            |                                  |
| 134                                                               | -0.3252818  | -1.342808  | 0.034816246                      |
| 0.082727894                                                       | 1           | 2619       | "tags=29%, list=19%, signal=35%" |
| GSE10325_BCELL_VS_LUPUS_BCELL_UP                                  |             |            |                                  |
| GSE10325_BCELL_VS_LUPUS_BCELL_UP                                  |             |            |                                  |
| 133                                                               | -0.3316119  | -1.342476  | 0.029469548                      |
| 0.082949646                                                       | 1           | 5132       | "tags=47%, list=36%, signal=73%" |
| GSE37319_WT_VS_RC3H1_KO_CD44LOW_CD8_TCELL_DN                      |             |            |                                  |
| GSE37319_WT_VS_RC3H1_KO_CD44LOW_CD8_TCELL_DN                      |             |            |                                  |
| 105                                                               | -0.3436834  | -1.3419846 | 0.031894933                      |
| 0.08325389                                                        | 1           | 2095       | "tags=26%, list=15%, signal=30%" |
| GSE13522_WT_VS_IFNAR_KO_SKIN_UP                                   |             |            |                                  |
| GSE13522_WT_VS_IFNAR_KO_SKIN_UP                                   |             |            |                                  |
| 142                                                               | -0.32260528 | -1.3419467 | 0.032818533                      |
| 0.08318792                                                        | 1           | 1523       | "tags=25%, list=11%, signal=27%" |
| GSE18893_CTRL_VS_TNF_TREATED_TREG_2H_UP                           |             |            |                                  |
| GSE18893_CTRL_VS_TNF_TREATED_TREG_2H_UP                           |             |            |                                  |
| 140                                                               | -0.32702368 | -1.3414968 | 0.03448276                       |
| 0.0834802                                                         | 1           | 1534       | "tags=22%, list=11%, signal=25%" |
| GSE17721_CTRL_VS_POLYIC_2H_BMDC_DN                                |             |            |                                  |
| GSE17721_CTRL_VS_POLYIC_2H_BMDC_DN                                |             |            |                                  |
| 157                                                               | -0.32038945 | -1.3400034 | 0.031128405                      |
| 0.08470573                                                        | 1           | 1718       | "tags=20%, list=12%, signal=23%" |
| GSE26669_CTRL_VS_COSTIM_BLOCK_MLR_CD4_TCELL_DN                    |             |            |                                  |
| GSE26669_CTRL_VS_COSTIM_BLOCK_MLR_CD4_TCELL_DN                    |             |            |                                  |
| 136                                                               | -0.32900903 | -1.3399769 | 0.029962547                      |

0.08463118 1 1612 "tags=22%, list=11%, signal=25%"  
GSE29949\_DC\_BRAIN\_VS\_MONOCYTE\_BONE\_MARROW\_DN  
GSE29949\_DC\_BRAIN\_VS\_MONOCYTE\_BONE\_MARROW\_DN  
152 -0.3210419 -1.3394761 0.034552846  
0.08499774 1 3786 "tags=36%, list=27%, signal=49%"  
GSE15735\_CTRL\_VS\_HDAC\_INHIBITOR\_TREATED\_CD4\_TCELL\_2H\_DN  
GSE15735\_CTRL\_VS\_HDAC\_INHIBITOR\_TREATED\_CD4\_TCELL\_2H\_DN  
133 -0.3281911 -1.3388041 0.032323234  
0.08550763 1 1139 "tags=20%, list=8%, signal=21%"  
GSE19941\_LPS\_VS\_LPS\_AND\_IL10\_STIM\_IL10\_KO\_NFKBP50\_KO\_MACROPHAGE\_UP  
GSE19941\_LPS\_VS\_LPS\_AND\_IL10\_STIM\_IL10\_KO\_NFKBP50\_KO\_MACROPHAGE\_UP  
138 -0.32769185 -1.338725 0.038674034  
0.08547884 1 2521 "tags=30%, list=18%, signal=37%"  
GSE15659\_NONSUPPRESSIVE\_TCELL\_VS\_ACTIVATED\_TREG\_UP  
GSE15659\_NONSUPPRESSIVE\_TCELL\_VS\_ACTIVATED\_TREG\_UP  
111 -0.33737352 -1.3385133 0.050880626  
0.08554154 1 4646 "tags=43%, list=33%, signal=64%"  
GSE22886\_TH1\_VS\_TH2\_12H\_ACT\_UP GSE22886\_TH1\_VS\_TH2\_12H\_ACT\_UP  
152 -0.318778 -1.3380332 0.038387716  
0.08586899 1 2300 "tags=24%, list=16%, signal=28%"  
GSE23502\_WT\_VS\_HDC\_KO\_MYELOID\_DERIVED\_SUPPRESSOR\_CELL\_COLON\_TUMOR\_DN  
  
GSE23502\_WT\_VS\_HDC\_KO\_MYELOID\_DERIVED\_SUPPRESSOR\_CELL\_COLON\_TUMOR\_DN  
146 -0.3255575 -1.3375412  
0.029739777 0.0861789 1 6728 "tags=62%,  
list=48%, signal=118%"  
GSE23925\_LIGHT\_ZONE\_VS\_DARK\_ZONE\_BCELL\_DN  
GSE23925\_LIGHT\_ZONE\_VS\_DARK\_ZONE\_BCELL\_DN  
147 -0.32610723 -1.337534 0.031128405  
0.08608218 1 1192 "tags=18%, list=8%, signal=20%"  
GSE43955\_10H\_VS\_30H\_ACT\_CD4\_TCELL\_WITH\_TGFB\_IL6\_DN  
GSE43955\_10H\_VS\_30H\_ACT\_CD4\_TCELL\_WITH\_TGFB\_IL6\_DN  
161 -0.31785336 -1.3369812 0.035250463  
0.086504646 1 2475 "tags=25%, list=18%, signal=30%"  
GSE19401\_NAIVE\_VS\_IMMUNIZED\_MOUSE\_PLN\_FOLLICULAR\_DC\_UP  
GSE19401\_NAIVE\_VS\_IMMUNIZED\_MOUSE\_PLN\_FOLLICULAR\_DC\_UP  
153 -0.32002413 -1.336665 0.041501977  
0.08667413 1 816 "tags=19%, list=6%, signal=20%"  
GSE17974\_IL4\_AND\_ANTI\_IL12\_VS\_UNTREATED\_24H\_ACT\_CD4\_TCELL\_UP  
GSE17974\_IL4\_AND\_ANTI\_IL12\_VS\_UNTREATED\_24H\_ACT\_CD4\_TCELL\_UP  
106 -0.3419156 -1.3365624 0.053407  
0.08667988 1 3753 "tags=36%, list=27%, signal=48%"  
GSE17974\_0H\_VS\_2H\_IN\_VITRO\_ACT\_CD4\_TCELL\_UP  
GSE17974\_0H\_VS\_2H\_IN\_VITRO\_ACT\_CD4\_TCELL\_UP  
126 -0.33335316 -1.3363044 0.032882012  
0.08681096 1 2635 "tags=29%, list=19%, signal=36%"  
GSE41176\_UNSTIM\_VS\_ANTI\_IGM\_STIM\_TAK1\_KO\_BCELL\_6H\_UP  
GSE41176\_UNSTIM\_VS\_ANTI\_IGM\_STIM\_TAK1\_KO\_BCELL\_6H\_UP  
139 -0.32486045 -1.3360432 0.036217302  
0.0869206 1 3117 "tags=31%, list=22%, signal=39%"  
GSE24634\_TEFF\_VS\_TCONV\_DAY7\_IN\_CULTURE\_DN  
GSE24634\_TEFF\_VS\_TCONV\_DAY7\_IN\_CULTURE\_DN  
146 -0.32647306 -1.3352154 0.030075189  
0.08755767 1 1128 "tags=18%, list=8%, signal=20%"

GSE37416\_0H\_VS\_48H\_F\_TULARENSIS\_LVS\_NEUTROPHIL\_DN  
GSE37416\_0H\_VS\_48H\_F\_TULARENSIS\_LVS\_NEUTROPHIL\_DN  
147 -0.32404113 -1.3339194 0.036764707  
0.08862142 1 1271 "tags=21%, list=9%, signal=23%"  
GSE25123\_CTRL\_VS\_IL4\_STIM\_PPARG\_KO\_MACROPHAGE\_DN  
GSE25123\_CTRL\_VS\_IL4\_STIM\_PPARG\_KO\_MACROPHAGE\_DN  
143 -0.32337755 -1.3338804 0.042226486  
0.08855653 1 2252 "tags=22%, list=16%, signal=26%"  
GSE13522\_WT\_VS\_IFNG\_KO\_SKING\_T\_CRUZI\_Y\_STRAIN\_INF\_DN  
GSE13522\_WT\_VS\_IFNG\_KO\_SKING\_T\_CRUZI\_Y\_STRAIN\_INF\_DN  
95 -0.3496398 -1.3323616 0.049360145  
0.08986935 1 2355 "tags=25%, list=17%, signal=30%"  
GSE21927\_SPLEEN\_VS\_TUMOR\_MONOCYTE\_C57BL6\_DN  
GSE21927\_SPLEEN\_VS\_TUMOR\_MONOCYTE\_C57BL6\_DN  
108 -0.33824134 -1.3322666 0.04423077  
0.08984382 1 2820 "tags=30%, list=20%, signal=37%"  
GSE7768\_OVA\_WITH\_LPS\_VS\_OVA\_WITH\_MPL\_IMMUNIZED\_MOUSE\_WHOLE\_SPLEEN\_6H\_DN  
GSE7768\_OVA\_WITH\_LPS\_VS\_OVA\_WITH\_MPL\_IMMUNIZED\_MOUSE\_WHOLE\_SPLEEN\_6H\_DN  
129 -0.33139968 -1.3315215  
0.02918288 0.090410545 1 2491 "tags=27%,  
list=18%, signal=33%"  
GSE40655\_FOXO1\_KO\_VS\_WT\_NTREG\_UP GSE40655\_FOXO1\_KO\_VS\_WT\_NTREG\_UP  
133 -0.3262334 -1.3314921 0.04725898  
0.09033099 1 2972 "tags=34%, list=21%, signal=42%"  
GSE26351\_WNT\_VS\_BMP\_PATHWAY\_STIM\_HEMATOPOIETIC\_PROGENITORS\_DN  
GSE26351\_WNT\_VS\_BMP\_PATHWAY\_STIM\_HEMATOPOIETIC\_PROGENITORS\_DN  
135 -0.32818794 -1.3313221 0.05078125  
0.0903585 1 1280 "tags=19%, list=9%, signal=20%"  
GSE2585\_CD80\_HIGH\_VS\_LOW\_AIRE\_KO\_MTEC\_UP  
GSE2585\_CD80\_HIGH\_VS\_LOW\_AIRE\_KO\_MTEC\_UP  
151 -0.31697854 -1.3310415 0.043809526  
0.09051692 1 2180 "tags=21%, list=15%, signal=24%"  
GSE11924\_TH2\_VS\_TH17\_CD4\_TCELL\_UP GSE11924\_TH2\_VS\_TH17\_CD4\_TCELL\_UP  
137 -0.32520145 -1.3310032 0.027777778  
0.09044539 1 2186 "tags=23%, list=15%, signal=27%"  
GSE13493\_CD4INTCD8POS\_VS\_CD8POS\_THYMOCYTE\_UP  
GSE13493\_CD4INTCD8POS\_VS\_CD8POS\_THYMOCYTE\_UP  
145 -0.32171118 -1.3308933 0.041431263  
0.09044789 1 1948 "tags=25%, list=14%, signal=29%"  
GSE4142\_NAIVE\_VS\_GC\_BCELL\_UP GSE4142\_NAIVE\_VS\_GC\_BCELL\_UP  
135 -0.32733276 -1.3302361 0.032015067  
0.09096576 1 2013 "tags=20%, list=14%, signal=23%"  
GSE41176\_UNSTIM\_VS\_ANTI\_IGM\_STIM\_BCELL\_24H\_UP  
GSE41176\_UNSTIM\_VS\_ANTI\_IGM\_STIM\_BCELL\_24H\_UP  
134 -0.32341996 -1.3301837 0.02793296  
0.090906754 1 3960 "tags=31%, list=28%, signal=42%"  
GSE2706\_2H\_VS\_8H\_R848\_STIM\_DC\_UP GSE2706\_2H\_VS\_8H\_R848\_STIM\_DC\_UP  
137 -0.3219993 -1.3297628 0.03314917  
0.09118659 1 1415 "tags=19%, list=10%, signal=21%"  
GSE7348\_UNSTIM\_VS\_TOLERIZED\_AND\_LPS\_STIM\_MACROPHAGE\_DN  
GSE7348\_UNSTIM\_VS\_TOLERIZED\_AND\_LPS\_STIM\_MACROPHAGE\_DN  
135 -0.32479188 -1.3295453 0.044401545  
0.09127137 1 2720 "tags=30%, list=19%, signal=36%"

GSE14413\_UNSTIM\_VS\_IFNB\_STIM\_NIH3T3\_CELLS\_DN  
GSE14413\_UNSTIM\_VS\_IFNB\_STIM\_NIH3T3\_CELLS\_DN  
98 -0.34149268 -1.3295346 0.05511811  
0.091175064 1 1740 "tags=22%, list=12%, signal=25%"  
GSE7509\_FCGRIIB\_VS\_TNFA\_IL1B\_IL6\_PGE\_STIM\_DC\_DN  
GSE7509\_FCGRIIB\_VS\_TNFA\_IL1B\_IL6\_PGE\_STIM\_DC\_DN  
102 -0.34068927 -1.3290151 0.062381852  
0.09154175 1 3000 "tags=30%, list=21%, signal=38%"  
GSE34156\_NOD2\_LIGAND\_VS\_TLR1\_TLR2\_LIGAND\_24H\_TREATED\_MONOCYTE\_DN  
GSE34156\_NOD2\_LIGAND\_VS\_TLR1\_TLR2\_LIGAND\_24H\_TREATED\_MONOCYTE\_DN  
111 -0.33477736 -1.3288411 0.057692308  
0.091605514 1 2368 "tags=26%, list=17%, signal=31%"  
GSE10273\_HIGH\_VS\_LOW\_IL7\_TREATED\_IRF4\_8\_NULL\_PRE\_BCELL\_DN  
GSE10273\_HIGH\_VS\_LOW\_IL7\_TREATED\_IRF4\_8\_NULL\_PRE\_BCELL\_DN  
136 -0.32158253 -1.3288312 0.04263566  
0.091509126 1 1146 "tags=21%, list=8%, signal=23%"  
GSE16385\_ROSIGLITAZONE\_IFNG\_TNF\_VS\_IL4\_STIM\_MACROPHAGE\_UP  
GSE16385\_ROSIGLITAZONE\_IFNG\_TNF\_VS\_IL4\_STIM\_MACROPHAGE\_UP  
160 -0.31753004 -1.328658 0.023809524  
0.09156035 1 2413 "tags=25%, list=17%, signal=30%"  
GSE3920\_IFNA\_VS\_IFNB\_TREATED\_ENDOTHELIAL\_CELL\_DN  
GSE3920\_IFNA\_VS\_IFNB\_TREATED\_ENDOTHELIAL\_CELL\_DN  
127 -0.32944143 -1.3286417 0.042201836  
0.09146614 1 1079 "tags=18%, list=8%, signal=19%"  
GSE26928\_EFF\_MEM\_VS\_CENTR\_MEM\_CD4\_TCELL\_DN  
GSE26928\_EFF\_MEM\_VS\_CENTR\_MEM\_CD4\_TCELL\_DN  
93 -0.34825438 -1.328455 0.04606526  
0.09154125 1 2242 "tags=23%, list=16%, signal=27%"  
GSE14000\_UNSTIM\_VS\_16H\_LPS\_DC\_TRANSLATED\_RNA\_UP  
GSE14000\_UNSTIM\_VS\_16H\_LPS\_DC\_TRANSLATED\_RNA\_UP  
143 -0.32531595 -1.3277316 0.041904762  
0.09210377 1 1500 "tags=23%, list=11%, signal=26%"  
GSE14699\_NAIVE\_VS\_DELETIONAL\_TOLERANCE\_CD8\_TCELL\_DN  
GSE14699\_NAIVE\_VS\_DELETIONAL\_TOLERANCE\_CD8\_TCELL\_DN  
146 -0.32221973 -1.327058 0.0331384  
0.09262715 1 2079 "tags=25%, list=15%, signal=29%"  
GSE2405\_0H\_VS\_3H\_A\_PHAGOCYTOPHILUM\_STIM\_NEUTROPHIL\_DN  
GSE2405\_0H\_VS\_3H\_A\_PHAGOCYTOPHILUM\_STIM\_NEUTROPHIL\_DN  
115 -0.33350715 -1.3265734 0.047709923  
0.092953496 1 1876 "tags=17%, list=13%, signal=20%"  
GSE4142\_GC\_BCELL\_VS\_MEMORY\_BCELL\_DN  
GSE4142\_GC\_BCELL\_VS\_MEMORY\_BCELL\_DN  
137 -0.3248844 -1.3249245 0.031067962  
0.09438056 1 1383 "tags=18%, list=10%, signal=19%"  
GSE9960\_GRAM\_NEG\_VS\_GRAM\_NEG\_AND\_POS\_SEPSIS\_PBMC\_UP  
GSE9960\_GRAM\_NEG\_VS\_GRAM\_NEG\_AND\_POS\_SEPSIS\_PBMC\_UP  
119 -0.3323465 -1.3243321 0.056751467  
0.09485608 1 2391 "tags=26%, list=17%, signal=31%"  
GSE39820\_CTRL\_VS\_TGFBETA1\_IL6\_IL23A\_CD4\_TCELL\_UP  
GSE39820\_CTRL\_VS\_TGFBETA1\_IL6\_IL23A\_CD4\_TCELL\_UP  
134 -0.32275853 -1.3237014 0.053639848  
0.095356375 1 2638 "tags=27%, list=19%, signal=33%"  
GSE43955\_TH0\_VS\_TGFB\_IL6\_TH17\_ACT\_CD4\_TCELL\_4H\_UP  
GSE43955\_TH0\_VS\_TGFB\_IL6\_TH17\_ACT\_CD4\_TCELL\_4H\_UP

152 -0.3207426 -1.3232032 0.028 0.09572591  
1 1021 "tags=16%, list=7%, signal=17%"  
GSE28783\_CTRL\_ANTI\_MIR\_VS\_UNTREATED\_ATHEROSCLEROSIS\_MACROPHAGE\_DN  
GSE28783\_CTRL\_ANTI\_MIR\_VS\_UNTREATED\_ATHEROSCLEROSIS\_MACROPHAGE\_DN  
144 -0.32212445 -1.3230287 0.037593983  
0.09577991 1 3194 "tags=33%, list=23%, signal=43%"  
GSE3337\_CTRL\_VS\_16H\_IFNG\_IN\_CD8POS\_DC\_UP  
GSE3337\_CTRL\_VS\_16H\_IFNG\_IN\_CD8POS\_DC\_UP  
166 -0.31304243 -1.3225836 0.035849057  
0.096123114 1 2426 "tags=26%, list=17%, signal=31%"  
GSE37533\_PPARG1\_FOXP3\_VS\_FOXP3\_TRANSDUCECD\_CD4\_TCELL\_PIOGLITAZONE\_TRE  
ATED\_UP  
GSE37533\_PPARG1\_FOXP3\_VS\_FOXP3\_TRANSDUCECD\_CD4\_TCELL\_PIOGLITAZONE\_TRE  
ATED\_UP 139 -0.32259455 -1.322379  
0.041044775 0.096229 1 1138 "tags=17%, list=8%,  
signal=19%"  
GSE7831\_CPG\_VS\_INFLUENZA\_STIM\_PDC\_4H\_UP  
GSE7831\_CPG\_VS\_INFLUENZA\_STIM\_PDC\_4H\_UP  
138 -0.32809475 -1.3220218 0.0407767  
0.09645309 1 1480 "tags=19%, list=10%, signal=21%"  
GSE3982\_MAC\_VS\_TH1\_UP GSE3982\_MAC\_VS\_TH1\_UP  
141 -0.326903 -1.3219024 0.052532833  
0.09645908 1 1277 "tags=20%, list=9%, signal=22%"  
GSE3982\_MAC\_VS\_BASOPHIL\_DN GSE3982\_MAC\_VS\_BASOPHIL\_DN  
130 -0.326356 -1.3216232 0.036659878  
0.09662763 1 2749 "tags=25%, list=19%, signal=31%"  
GSE45739\_UNSTIM\_VS\_ACD3\_ACD28\_STIM\_NRAS\_KO\_CD4\_TCELL\_DN  
GSE45739\_UNSTIM\_VS\_ACD3\_ACD28\_STIM\_NRAS\_KO\_CD4\_TCELL\_DN  
144 -0.32330823 -1.3215073 0.03815261  
0.09663879 1 1145 "tags=15%, list=8%, signal=16%"  
GSE46606\_UNSTIM\_VS\_CD40L\_IL2\_IL5\_DAY1\_STIMULATED\_BCELL\_UP  
GSE46606\_UNSTIM\_VS\_CD40L\_IL2\_IL5\_DAY1\_STIMULATED\_BCELL\_UP  
129 -0.32419643 -1.3215054 0.046558704  
0.096529104 1 1585 "tags=24%, list=11%, signal=27%"  
GSE2770\_IL4\_ACT\_VS\_ACT\_CD4\_TCELL\_2H\_DN  
GSE2770\_IL4\_ACT\_VS\_ACT\_CD4\_TCELL\_2H\_DN  
139 -0.32224816 -1.3214077 0.047984645  
0.09651149 1 1704 "tags=24%, list=12%, signal=27%"  
GSE40274\_CTRL\_VS\_HELIOS\_TRANSDUCECD\_ACTIVATED\_CD4\_TCELL\_DN  
GSE40274\_CTRL\_VS\_HELIOS\_TRANSDUCECD\_ACTIVATED\_CD4\_TCELL\_DN  
145 -0.3196422 -1.321401 0.038535647  
0.09641071 1 2362 "tags=27%, list=17%, signal=32%"  
GSE43863\_NAIVE\_VS\_TFH\_CD4\_EFF\_TCELL\_D6\_LCMV\_DN  
GSE43863\_NAIVE\_VS\_TFH\_CD4\_EFF\_TCELL\_D6\_LCMV\_DN  
101 -0.3338456 -1.3211623 0.04743083  
0.09651757 1 2394 "tags=25%, list=17%, signal=30%"  
GSE27241\_CTRL\_VS\_DIGOXIN\_TREATED\_CD4\_TCELL\_IN\_TH17\_POLARIZING\_CONDIT  
IONS\_DN  
GSE27241\_CTRL\_VS\_DIGOXIN\_TREATED\_CD4\_TCELL\_IN\_TH17\_POLARIZING\_CONDIT  
IONS\_DN 144 -0.32493007 -1.3211592  
0.029013539 0.09641329 1 1766 "tags=22%,  
list=13%, signal=24%"  
GSE21546\_WT\_VS\_SAP1A\_KO\_AND\_ELK1\_KO\_DP\_THYMOCYTES\_UP  
GSE21546\_WT\_VS\_SAP1A\_KO\_AND\_ELK1\_KO\_DP\_THYMOCYTES\_UP



|                                                              |             |                                                              |                                  |
|--------------------------------------------------------------|-------------|--------------------------------------------------------------|----------------------------------|
| 150                                                          | -0.31934643 | -1.3210443                                                   | 0.036764707                      |
| 0.09642986                                                   | 1           | 2193                                                         | "tags=22%, list=16%, signal=26%" |
| GSE9037_WT_VS_IRAK4_KO_BMDM_UP                               |             | GSE9037_WT_VS_IRAK4_KO_BMDM_UP                               |                                  |
| 141                                                          | -0.3224034  | -1.3207827                                                   | 0.042307694                      |
| 0.09655534                                                   | 1           | 1767                                                         | "tags=23%, list=13%, signal=26%" |
| GSE19923_HEB_KO_VS_HEB_AND_E2A_KO_DP_THYMOCYTE_DN            |             | GSE19923_HEB_KO_VS_HEB_AND_E2A_KO_DP_THYMOCYTE_DN            |                                  |
| GSE19923_HEB_KO_VS_HEB_AND_E2A_KO_DP_THYMOCYTE_DN            |             | GSE19923_HEB_KO_VS_HEB_AND_E2A_KO_DP_THYMOCYTE_DN            |                                  |
| 159                                                          | -0.31643692 | -1.3188634                                                   | 0.0390625                        |
| 0.09828374                                                   | 1           | 1356                                                         | "tags=18%, list=10%, signal=19%" |
| GSE42021_CD24INT_VS_CD24LOW_TREG_THYMUS_DN                   |             | GSE42021_CD24INT_VS_CD24LOW_TREG_THYMUS_DN                   |                                  |
| GSE42021_CD24INT_VS_CD24LOW_TREG_THYMUS_DN                   |             | GSE42021_CD24INT_VS_CD24LOW_TREG_THYMUS_DN                   |                                  |
| 145                                                          | -0.32162872 | -1.3187048                                                   | 0.031307552                      |
| 0.09832748                                                   | 1           | 2579                                                         | "tags=28%, list=18%, signal=34%" |
| GSE6259_BCELL_VS_CD8_TCELL_UP                                |             | GSE6259_BCELL_VS_CD8_TCELL_UP                                |                                  |
| 127                                                          | -0.3255602  | -1.318685                                                    | 0.044315994                      |
| 0.098247245                                                  | 1           | 1349                                                         | "tags=17%, list=10%, signal=18%" |
| GSE36826_NORMAL_VS_STAPH_AUREUS_INF_SKIN_DN                  |             | GSE36826_NORMAL_VS_STAPH_AUREUS_INF_SKIN_DN                  |                                  |
| GSE36826_NORMAL_VS_STAPH_AUREUS_INF_SKIN_DN                  |             | GSE36826_NORMAL_VS_STAPH_AUREUS_INF_SKIN_DN                  |                                  |
| 150                                                          | -0.3225478  | -1.3186682                                                   | 0.023076924                      |
| 0.09814742                                                   | 1           | 1953                                                         | "tags=24%, list=14%, signal=28%" |
| GSE11961_MEMORY_BCELL_DAY7_VS_GERMINAL_CENTER_BCELL_DAY40_DN |             | GSE11961_MEMORY_BCELL_DAY7_VS_GERMINAL_CENTER_BCELL_DAY40_DN |                                  |
| GSE11961_MEMORY_BCELL_DAY7_VS_GERMINAL_CENTER_BCELL_DAY40_DN |             | GSE11961_MEMORY_BCELL_DAY7_VS_GERMINAL_CENTER_BCELL_DAY40_DN |                                  |
| 142                                                          | -0.31931952 | -1.318309                                                    | 0.038986355                      |
| 0.09836568                                                   | 1           | 2551                                                         | "tags=28%, list=18%, signal=34%" |
| GSE46606_UNSTIM_VS_CD40L_IL2_IL5_DAY3_STIMULATED_BCELL_UP    |             | GSE46606_UNSTIM_VS_CD40L_IL2_IL5_DAY3_STIMULATED_BCELL_UP    |                                  |
| GSE46606_UNSTIM_VS_CD40L_IL2_IL5_DAY3_STIMULATED_BCELL_UP    |             | GSE46606_UNSTIM_VS_CD40L_IL2_IL5_DAY3_STIMULATED_BCELL_UP    |                                  |
| 128                                                          | -0.32636243 | -1.3177655                                                   | 0.06066536                       |
| 0.09881297                                                   | 1           | 1544                                                         | "tags=22%, list=11%, signal=24%" |
| GSE8835_CD4_VS_CD8_TCELL_CLL_PATIENT_UP                      |             | GSE8835_CD4_VS_CD8_TCELL_CLL_PATIENT_UP                      |                                  |
| GSE8835_CD4_VS_CD8_TCELL_CLL_PATIENT_UP                      |             | GSE8835_CD4_VS_CD8_TCELL_CLL_PATIENT_UP                      |                                  |
| 147                                                          | -0.31884417 | -1.3176124                                                   | 0.038535647                      |
| 0.09886736                                                   | 1           | 2297                                                         | "tags=26%, list=16%, signal=31%" |
| GSE22886_NAIVE_BCELL_VS_MONOCYTE_UP                          |             | GSE22886_NAIVE_BCELL_VS_MONOCYTE_UP                          |                                  |
| GSE22886_NAIVE_BCELL_VS_MONOCYTE_UP                          |             | GSE22886_NAIVE_BCELL_VS_MONOCYTE_UP                          |                                  |
| 118                                                          | -0.3254724  | -1.3168362                                                   | 0.04761905                       |
| 0.09956004                                                   | 1           | 2212                                                         | "tags=27%, list=16%, signal=32%" |
| GSE26030_TH1_VS_TH17_DAY5_POST_POLARIZATION_UP               |             | GSE26030_TH1_VS_TH17_DAY5_POST_POLARIZATION_UP               |                                  |
| GSE26030_TH1_VS_TH17_DAY5_POST_POLARIZATION_UP               |             | GSE26030_TH1_VS_TH17_DAY5_POST_POLARIZATION_UP               |                                  |
| 143                                                          | -0.31714615 | -1.316767                                                    | 0.030245747                      |
| 0.099505305                                                  | 1           | 1665                                                         | "tags=24%, list=12%, signal=27%" |
| GSE9006_TYPE_1_DIABETES_AT_DX_VS_4MONTH_POST_DX_PBMC_DN      |             | GSE9006_TYPE_1_DIABETES_AT_DX_VS_4MONTH_POST_DX_PBMC_DN      |                                  |
| GSE9006_TYPE_1_DIABETES_AT_DX_VS_4MONTH_POST_DX_PBMC_DN      |             | GSE9006_TYPE_1_DIABETES_AT_DX_VS_4MONTH_POST_DX_PBMC_DN      |                                  |
| 124                                                          | -0.32537493 | -1.3158045                                                   | 0.05380334                       |
| 0.10037085                                                   | 1           | 1462                                                         | "tags=17%, list=10%, signal=19%" |
| GSE43863_TFH_VS_LY6C_LOW_CXCR5NEG_EFFECTOR_CD4_TCELL_DN      |             | GSE43863_TFH_VS_LY6C_LOW_CXCR5NEG_EFFECTOR_CD4_TCELL_DN      |                                  |
| GSE43863_TFH_VS_LY6C_LOW_CXCR5NEG_EFFECTOR_CD4_TCELL_DN      |             | GSE43863_TFH_VS_LY6C_LOW_CXCR5NEG_EFFECTOR_CD4_TCELL_DN      |                                  |
| 167                                                          | -0.3156411  | -1.3157628                                                   | 0.03187251                       |
| 0.10028984                                                   | 1           | 1712                                                         | "tags=18%, list=12%, signal=20%" |
| GSE17186_NAIVE_VS_CD21LOW_TRANSITIONAL_BCELL_CORD_BLOOD_UP   |             | GSE17186_NAIVE_VS_CD21LOW_TRANSITIONAL_BCELL_CORD_BLOOD_UP   |                                  |
| GSE17186_NAIVE_VS_CD21LOW_TRANSITIONAL_BCELL_CORD_BLOOD_UP   |             | GSE17186_NAIVE_VS_CD21LOW_TRANSITIONAL_BCELL_CORD_BLOOD_UP   |                                  |
| 152                                                          | -0.31533593 | -1.3143059                                                   | 0.034026466                      |
| 0.10168451                                                   | 1           | 1377                                                         | "tags=19%, list=10%, signal=21%" |
| GSE18791_UNSTIM_VS_NEWCATSLE_VIRUS_DC_18H_DN                 |             | GSE18791_UNSTIM_VS_NEWCATSLE_VIRUS_DC_18H_DN                 |                                  |
| GSE18791_UNSTIM_VS_NEWCATSLE_VIRUS_DC_18H_DN                 |             | GSE18791_UNSTIM_VS_NEWCATSLE_VIRUS_DC_18H_DN                 |                                  |

109 -0.3366663 -1.3141992 0.059160307  
0.10167539 1 2406 "tags=27%, list=17%, signal=32%"  
GSE15659\_CD45RA\_NEG\_CD4\_TCELL\_VS\_ACTIVATED\_TREG\_UP  
GSE15659\_CD45RA\_NEG\_CD4\_TCELL\_VS\_ACTIVATED\_TREG\_UP  
110 -0.32962027 -1.314008 0.056925997  
0.10175215 1 4381 "tags=42%, list=31%, signal=60%"  
GSE10240\_IL22\_VS\_IL22\_AND\_IL17\_STIM\_PRIMARY\_BRONCHIAL\_EPITHELIAL\_CEL  
LS\_UP  
GSE10240\_IL22\_VS\_IL22\_AND\_IL17\_STIM\_PRIMARY\_BRONCHIAL\_EPITHELIAL\_CEL  
LS\_UP  
147 -0.31823874 -1.3137344  
0.045081966 0.10192301 1 1856 "tags=27%,  
list=13%, signal=31%"  
GSE1448\_CTRL\_VS\_ANTI\_VALPHA2\_DP\_THYMOCYTE\_DN  
GSE1448\_CTRL\_VS\_ANTI\_VALPHA2\_DP\_THYMOCYTE\_DN  
160 -0.31657678 -1.3132914 0.042435423  
0.10225179 1 2178 "tags=21%, list=15%, signal=24%"  
GSE7852\_LN\_VS\_FAT\_TCONV\_DN GSE7852\_LN\_VS\_FAT\_TCONV\_DN  
151 -0.31961796 -1.3123419 0.030828517  
0.10313759 1 1594 "tags=23%, list=11%, signal=26%"  
GSE8921\_UNSTIM\_0H\_VS\_TLR1\_2\_STIM\_MONOCYTE\_6H\_DN  
GSE8921\_UNSTIM\_0H\_VS\_TLR1\_2\_STIM\_MONOCYTE\_6H\_DN  
130 -0.32069576 -1.3122443 0.046846848  
0.10311317 1 1927 "tags=23%, list=14%, signal=26%"  
GSE22045\_TREG\_VS\_TCONV\_DN GSE22045\_TREG\_VS\_TCONV\_DN  
102 -0.33350414 -1.3119526 0.06422018  
0.10332707 1 2292 "tags=26%, list=16%, signal=31%"  
GSE3039\_CD4\_TCELL\_VS\_ALPHABETA\_CD8\_TCELL\_UP  
GSE3039\_CD4\_TCELL\_VS\_ALPHABETA\_CD8\_TCELL\_UP  
144 -0.3193564 -1.311828 0.031936128  
0.10332932 1 2199 "tags=25%, list=16%, signal=29%"  
GSE22601\_DOUBLE\_NEGATIVE\_VS\_CD4\_SINGLE\_POSITIVE\_THYMOCYTE\_UP  
GSE22601\_DOUBLE\_NEGATIVE\_VS\_CD4\_SINGLE\_POSITIVE\_THYMOCYTE\_UP  
147 -0.31317496 -1.3114042 0.031894933  
0.103626445 1 1349 "tags=22%, list=10%, signal=25%"  
GSE28737\_FOLLICULAR\_VS\_MARGINAL\_ZONE\_BCELL\_BCL6\_HET\_UP  
GSE28737\_FOLLICULAR\_VS\_MARGINAL\_ZONE\_BCELL\_BCL6\_HET\_UP  
130 -0.3241411 -1.3114016 0.05162524  
0.10351431 1 2211 "tags=28%, list=16%, signal=33%"  
GSE27786\_BCELL\_VS\_CD4\_TCELL\_DN GSE27786\_BCELL\_VS\_CD4\_TCELL\_DN  
138 -0.32312733 -1.3112867 0.033771105  
0.10352446 1 2108 "tags=23%, list=15%, signal=27%"  
GSE31082\_DP\_VS\_CD8\_SP\_THYMOCYTE\_DN  
GSE31082\_DP\_VS\_CD8\_SP\_THYMOCYTE\_DN  
147 -0.31758675 -1.3110763 0.035781544  
0.10360309 1 1845 "tags=22%, list=13%, signal=26%"  
GSE27786\_LIN\_NEG\_VS\_CD4\_TCELL\_DN GSE27786\_LIN\_NEG\_VS\_CD4\_TCELL\_DN  
142 -0.31741565 -1.310868 0.037664782  
0.10369257 1 1621 "tags=22%, list=11%, signal=24%"  
GSE19941\_UNSTIM\_VS\_LPS\_STIM\_IL10\_KO\_NFKBP50\_KO\_MACROPHAGE\_DN  
GSE19941\_UNSTIM\_VS\_LPS\_STIM\_IL10\_KO\_NFKBP50\_KO\_MACROPHAGE\_DN  
134 -0.32595766 -1.3096942 0.042201836  
0.104776345 1 2594 "tags=25%, list=18%, signal=31%"  
GSE41176\_UNSTIM\_VS\_ANTI\_IGM\_STIM\_TAK1\_KO\_BCELL\_24H\_DN  
GSE41176\_UNSTIM\_VS\_ANTI\_IGM\_STIM\_TAK1\_KO\_BCELL\_24H\_DN

|                                                                     |             |                                   |                                  |
|---------------------------------------------------------------------|-------------|-----------------------------------|----------------------------------|
| 143                                                                 | -0.3176259  | -1.3094466                        | 0.041431263                      |
| 0.10492218                                                          | 1           | 1871                              | "tags=24%, list=13%, signal=27%" |
| GSE14350_IL2RB_KO_VS_WT_TREG_UP                                     |             | GSE14350_IL2RB_KO_VS_WT_TREG_UP   |                                  |
|                                                                     | 154         | -0.31205568                       | -1.3092524                       |
|                                                                     |             |                                   | 0.030534351                      |
| 0.10499615                                                          | 1           | 2317                              | "tags=27%, list=16%, signal=32%" |
| GSE3039_ALPHABETA_CD8_TCELL_VS_B1_BCELL_UP                          |             |                                   |                                  |
| GSE3039_ALPHABETA_CD8_TCELL_VS_B1_BCELL_UP                          |             |                                   |                                  |
| 127                                                                 | -0.32188505 | -1.3091393                        | 0.047358833                      |
| 0.104995154                                                         | 1           | 2145                              | "tags=28%, list=15%, signal=32%" |
| GSE37605_C57BL6_VS_NOD_FOXP3_FUSION_GFP_TREG_DN                     |             |                                   |                                  |
| GSE37605_C57BL6_VS_NOD_FOXP3_FUSION_GFP_TREG_DN                     |             |                                   |                                  |
| 153                                                                 | -0.31998837 | -1.3089956                        | 0.033663366                      |
| 0.10503101                                                          | 1           | 1591                              | "tags=24%, list=11%, signal=27%" |
| GSE13522_WT_VS_IFNG_KO_SKIN_UP                                      |             | GSE13522_WT_VS_IFNG_KO_SKIN_UP    |                                  |
|                                                                     | 97          | -0.33803377                       | -1.3087052                       |
|                                                                     |             |                                   | 0.054924242                      |
| 0.10522121                                                          | 1           | 6143                              | "tags=54%, list=44%, signal=94%" |
| GSE29949_MICROGLIA_VS_DC_BRAIN_UP                                   |             | GSE29949_MICROGLIA_VS_DC_BRAIN_UP |                                  |
|                                                                     | 151         | -0.31386703                       | -1.3072543                       |
|                                                                     |             |                                   | 0.039138943                      |
| 0.106637895                                                         | 1           | 1815                              | "tags=19%, list=13%, signal=22%" |
| GSE22589_HIV_VS_HIV_AND_SIV_INFECTED_DC_UP                          |             |                                   |                                  |
| GSE22589_HIV_VS_HIV_AND_SIV_INFECTED_DC_UP                          |             |                                   |                                  |
| 144                                                                 | -0.31535715 | -1.3070134                        | 0.046554934                      |
| 0.106778845                                                         | 1           | 2822                              | "tags=28%, list=20%, signal=34%" |
| GSE25677_MPL_VS_MPL_AND_R848_STIM_BCELL_DN                          |             |                                   |                                  |
| GSE25677_MPL_VS_MPL_AND_R848_STIM_BCELL_DN                          |             |                                   |                                  |
| 98                                                                  | -0.3335782  | -1.3069999                        | 0.066287875                      |
| 0.10668308                                                          | 1           | 2867                              | "tags=40%, list=20%, signal=50%" |
| GSE17721_PAM3CSK4_VS_GADIQUIMOD_0.5H_BMDC_UP                        |             |                                   |                                  |
| GSE17721_PAM3CSK4_VS_GADIQUIMOD_0.5H_BMDC_UP                        |             |                                   |                                  |
| 156                                                                 | -0.31388032 | -1.3063778                        | 0.037328094                      |
| 0.10725143                                                          | 1           | 2562                              | "tags=27%, list=18%, signal=33%" |
| GSE30971_WBP7_HET_VS_KO_MACROPHAGE_UP                               |             |                                   |                                  |
| GSE30971_WBP7_HET_VS_KO_MACROPHAGE_UP                               |             |                                   |                                  |
| 147                                                                 | -0.31305695 | -1.3061789                        | 0.043726236                      |
| 0.10736701                                                          | 1           | 1259                              | "tags=17%, list=9%, signal=18%"  |
| GSE37532_WT_VS_PPARG_KO_VISCERAL_ADIPOSE_TISSUE_TREG_DN             |             |                                   |                                  |
| GSE37532_WT_VS_PPARG_KO_VISCERAL_ADIPOSE_TISSUE_TREG_DN             |             |                                   |                                  |
| 159                                                                 | -0.31252196 | -1.3058137                        | 0.054003723                      |
| 0.1075987                                                           | 1           | 1769                              | "tags=23%, list=13%, signal=26%" |
| GSE17974_IL4_AND_ANTI_IL12_VS_UNTREATED_1H_ACT_CD4_TCELL_UP         |             |                                   |                                  |
| GSE17974_IL4_AND_ANTI_IL12_VS_UNTREATED_1H_ACT_CD4_TCELL_UP         |             |                                   |                                  |
| 112                                                                 | -0.32384002 | -1.3052412                        | 0.06273764                       |
| 0.108042166                                                         | 1           | 2170                              | "tags=20%, list=15%, signal=23%" |
| GSE5679_RARA_AGONIST_AM580_VS_AM580_AND_ROSIGLITAZONE_TREATED_DC_DN |             |                                   |                                  |
| GSE5679_RARA_AGONIST_AM580_VS_AM580_AND_ROSIGLITAZONE_TREATED_DC_DN |             |                                   |                                  |
|                                                                     | 152         | -0.31558755                       | -1.3049016                       |
|                                                                     |             |                                   | 0.042944785                      |
| 0.10827009                                                          | 1           | 1573                              | "tags=21%, list=11%, signal=23%" |
| GSE4590_PRE_BCELL_VS_SMALL_PRE_BCELL_DN                             |             |                                   |                                  |
| GSE4590_PRE_BCELL_VS_SMALL_PRE_BCELL_DN                             |             |                                   |                                  |
| 92                                                                  | -0.34020463 | -1.3041568                        | 0.06616257                       |
| 0.108901896                                                         | 1           | 2590                              | "tags=30%, list=18%, signal=37%" |
| GSE22935_UNSTIM_VS_12H_MBOVIS_BCG_STIM_MYD88_KO_MACROPHAGE_UP       |             |                                   |                                  |
| GSE22935_UNSTIM_VS_12H_MBOVIS_BCG_STIM_MYD88_KO_MACROPHAGE_UP       |             |                                   |                                  |
|                                                                     | 151         | -0.3153504                        | -1.3037966                       |
|                                                                     |             |                                   | 0.03846154                       |

0.1091944 1 3705 "tags=34%, list=26%, signal=46%"  
GSE21380\_NON\_TFH\_VS\_TFH\_CD4\_TCELL\_UP  
GSE21380\_NON\_TFH\_VS\_TFH\_CD4\_TCELL\_UP  
143 -0.31932288 -1.3028718 0.041493777  
0.11009271 1 2377 "tags=29%, list=17%, signal=35%"  
GSE23568\_ID3\_KO\_VS\_WT\_CD8\_TCELL\_DN  
GSE23568\_ID3\_KO\_VS\_WT\_CD8\_TCELL\_DN  
161 -0.30778503 -1.3021698 0.035051547  
0.11070151 1 1883 "tags=29%, list=13%, signal=33%"  
GSE29618\_PRE\_VS\_DAY7\_FLU\_VACCINE\_MDC\_DN  
GSE29618\_PRE\_VS\_DAY7\_FLU\_VACCINE\_MDC\_DN  
132 -0.31659228 -1.3020039 0.037243947  
0.11075958 1 2237 "tags=24%, list=16%, signal=29%"  
GSE42021\_TREG\_VS\_TCONV\_PLN\_UP GSE42021\_TREG\_VS\_TCONV\_PLN\_UP  
138 -0.319337 -1.3013281 0.05464481  
0.111392595 1 2184 "tags=28%, list=15%, signal=32%"  
GSE8921\_3H\_VS\_24H\_TLR1\_2\_STIM\_MONOCYTE\_UP  
GSE8921\_3H\_VS\_24H\_TLR1\_2\_STIM\_MONOCYTE\_UP  
135 -0.32037085 -1.3008181 0.05697446  
0.111835815 1 823 "tags=16%, list=6%, signal=17%"  
GSE11057\_NAIVE\_VS\_MEMORY\_CD4\_TCELL\_UP  
GSE11057\_NAIVE\_VS\_MEMORY\_CD4\_TCELL\_UP  
107 -0.3329441 -1.2998577 0.07156673  
0.112744115 1 2352 "tags=22%, list=17%, signal=27%"  
GSE37533\_PPARG1\_FOXP3\_VS\_PPARG2\_FOXP3\_TRANSDUCECD\_CD4\_TCELL\_PIOGLITAZ  
ONE\_TREATED\_DN  
GSE37533\_PPARG1\_FOXP3\_VS\_PPARG2\_FOXP3\_TRANSDUCECD\_CD4\_TCELL\_PIOGLITAZ  
ONE\_TREATED\_DN 140 -0.31335512 -1.2992357  
0.04699248 0.11332086 1 1506 "tags=21%,  
list=11%, signal=23%"  
GSE17721\_LPS\_VS\_GARDIQUIMOD\_1H\_BMDC\_UP  
GSE17721\_LPS\_VS\_GARDIQUIMOD\_1H\_BMDC\_UP  
160 -0.3073048 -1.298962 0.04109589  
0.113482244 1 2025 "tags=22%, list=14%, signal=25%"  
GSE14308\_TH2\_VS\_NAIVE\_CD4\_TCELL\_DN  
GSE14308\_TH2\_VS\_NAIVE\_CD4\_TCELL\_DN  
136 -0.3171336 -1.2986308 0.0498155  
0.1137023 1 2075 "tags=21%, list=15%, signal=24%"  
GSE7852\_TREG\_VS\_TCONV\_LN\_UP GSE7852\_TREG\_VS\_TCONV\_LN\_UP  
148 -0.31243855 -1.2984403 0.054844607  
0.11382756 1 1779 "tags=26%, list=13%, signal=29%"  
GSE29618\_MONOCYTE\_VS\_MDC\_UP GSE29618\_MONOCYTE\_VS\_MDC\_UP  
149 -0.31525698 -1.2978473 0.03468208  
0.11440237 1 2081 "tags=26%, list=15%, signal=30%"  
GSE5503\_MLN\_DC\_VS\_SPLEEN\_DC\_ACTIVATED\_ALLOGENIC\_TCELL\_UP  
GSE5503\_MLN\_DC\_VS\_SPLEEN\_DC\_ACTIVATED\_ALLOGENIC\_TCELL\_UP  
156 -0.30933383 -1.2973918 0.040384617  
0.11477885 1 1277 "tags=18%, list=9%, signal=20%"  
GSE17721\_CPG\_VS\_GARDIQUIMOD\_12H\_BMDC\_DN  
GSE17721\_CPG\_VS\_GARDIQUIMOD\_12H\_BMDC\_DN  
147 -0.3122301 -1.2972476 0.037037037  
0.1148305 1 1837 "tags=24%, list=13%, signal=27%"  
GSE6259\_33D1\_POS\_DC\_VS\_CD4\_TCELL\_DN  
GSE6259\_33D1\_POS\_DC\_VS\_CD4\_TCELL\_DN

142 -0.3153454 -1.2969589 0.04477612  
0.115007885 1 2388 "tags=26%, list=17%, signal=31%"  
GSE42021\_CD24INT\_VS\_CD24LOW\_TCONV\_THYMUS\_DN  
GSE42021\_CD24INT\_VS\_CD24LOW\_TCONV\_THYMUS\_DN  
136 -0.31721604 -1.296714 0.048076924  
0.11515027 1 1766 "tags=19%, list=13%, signal=22%"  
GSE17580\_TREG\_VS\_TEFF\_UP GSE17580\_TREG\_VS\_TEFF\_UP  
152 -0.31279215 -1.2952721 0.046468403  
0.11661819 1 2188 "tags=27%, list=16%, signal=32%"  
GSE22601\_IMMATURE\_CD4\_SINGLE\_POSITIVE\_VS\_DOUBLE\_POSITIVE\_THYMOCYTE\_D  
N  
GSE22601\_IMMATURE\_CD4\_SINGLE\_POSITIVE\_VS\_DOUBLE\_POSITIVE\_THYMOCYTE\_D  
N  
145 -0.31586003 -1.2952498  
0.042226486 0.11650902 1 1918 "tags=24%,  
list=14%, signal=28%"  
GSE23502\_BM\_VS\_COLON\_TUMOR\_HDC\_KO\_MYELOID\_DERIVED\_SUPPRESSOR\_CELL\_DN  
  
GSE23502\_BM\_VS\_COLON\_TUMOR\_HDC\_KO\_MYELOID\_DERIVED\_SUPPRESSOR\_CELL\_DN  
140 -0.3150156 -1.2951254  
0.03984064 0.11652983 1 1463 "tags=21%,  
list=10%, signal=23%"  
GSE3982\_BASOPHIL\_VS\_TH1\_UP GSE3982\_BASOPHIL\_VS\_TH1\_UP  
136 -0.31415612 -1.2947803 0.05544933  
0.11680029 1 2214 "tags=25%, list=16%, signal=29%"  
GSE26488\_WT\_VS\_HDAC7\_DELTAP\_TG\_OT2\_THYMOCYTE\_WITH\_PEPTIDE\_INJECTION\_  
DN  
GSE26488\_WT\_VS\_HDAC7\_DELTAP\_TG\_OT2\_THYMOCYTE\_WITH\_PEPTIDE\_INJECTION\_  
DN  
167 -0.30823722 -1.2941617  
0.04537205 0.11737901 1 2327 "tags=24%,  
list=16%, signal=28%"  
GSE21380\_NON\_TFH\_VS\_TFH\_CD4\_TCELL\_DN  
GSE21380\_NON\_TFH\_VS\_TFH\_CD4\_TCELL\_DN  
152 -0.31434393 -1.2940624 0.054924242  
0.11736517 1 1979 "tags=26%, list=14%, signal=30%"  
GSE26290\_WT\_VS\_PDK1\_KO\_ANTI\_CD3\_AND\_IL2\_STIM\_CD8\_TCELL\_UP  
GSE26290\_WT\_VS\_PDK1\_KO\_ANTI\_CD3\_AND\_IL2\_STIM\_CD8\_TCELL\_UP  
133 -0.3187794 -1.293571 0.055445544  
0.11775576 1 2409 "tags=26%, list=17%, signal=31%"  
GSE27786\_CD8\_TCELL\_VS\_NKTCELL\_UP GSE27786\_CD8\_TCELL\_VS\_NKTCELL\_UP  
150 -0.3098136 -1.2931077 0.03984064  
0.118154354 1 993 "tags=16%, list=7%, signal=17%"  
GSE40274\_XBP1\_VS\_FOXP3\_AND\_XBP1\_TRANSDUCED\_ACTIVATED\_CD4\_TCELL\_UP  
GSE40274\_XBP1\_VS\_FOXP3\_AND\_XBP1\_TRANSDUCED\_ACTIVATED\_CD4\_TCELL\_UP  
149 -0.3114174 -1.2929902 0.051376145  
0.11816991 1 1480 "tags=23%, list=10%, signal=25%"  
GSE25088\_IL4\_VS\_IL4\_AND\_ROSIGLITAZONE\_STIM\_STAT6\_KO\_MACROPHAGE\_DAY10  
\_DN  
GSE25088\_IL4\_VS\_IL4\_AND\_ROSIGLITAZONE\_STIM\_STAT6\_KO\_MACROPHAGE\_DAY10  
\_DN  
137 -0.31829554 -1.292985  
0.049212597 0.11805028 1 1895 "tags=24%,  
list=13%, signal=28%"  
GSE24574\_BCL6\_HIGH\_TFH\_VS\_TCONV\_CD4\_TCELL\_UP  
GSE24574\_BCL6\_HIGH\_TFH\_VS\_TCONV\_CD4\_TCELL\_UP  
142 -0.31159946 -1.2926773 0.056603774

0.11825312 1 1164 "tags=16%, list=8%, signal=17%"  
GSE36826\_NORMAL\_VS\_STAPH\_AUREUS\_INF\_IL1R\_KO\_SKIN\_UP  
GSE36826\_NORMAL\_VS\_STAPH\_AUREUS\_INF\_IL1R\_KO\_SKIN\_UP  
155 -0.30896795 -1.2921555 0.040152963  
0.118700385 1 3139 "tags=33%, list=22%, signal=42%"  
GSE12366\_NAIVE\_VS\_MEMORY\_BCELL\_UP GSE12366\_NAIVE\_VS\_MEMORY\_BCELL\_UP  
122 -0.3235222 -1.2913907 0.056338027  
0.119436815 1 2377 "tags=24%, list=17%, signal=28%"  
GSE27291\_0H\_VS\_7D\_STIM\_GAMMADELTA\_TCELL\_UP  
GSE27291\_0H\_VS\_7D\_STIM\_GAMMADELTA\_TCELL\_UP  
121 -0.31766537 -1.2913512 0.05451128  
0.1193507 1 3050 "tags=36%, list=22%, signal=46%"  
GSE3982\_DC\_VS\_TH2\_UP GSE3982\_DC\_VS\_TH2\_UP  
144 -0.31590566 -1.2912791 0.04174573  
0.119317584 1 3360 "tags=30%, list=24%, signal=39%"  
GSE42724\_NAIVE\_BCELL\_VS\_PLASMABLAST\_UP  
GSE42724\_NAIVE\_BCELL\_VS\_PLASMABLAST\_UP  
135 -0.3167117 -1.2911615 0.062030077  
0.11932564 1 1856 "tags=24%, list=13%, signal=27%"  
GSE41176\_WT\_VS\_TAK1\_KO\_UNSTIM\_BCELL\_DN  
GSE41176\_WT\_VS\_TAK1\_KO\_UNSTIM\_BCELL\_DN  
131 -0.3174781 -1.2904288 0.06126482  
0.119990334 1 4801 "tags=41%, list=34%, signal=62%"  
GSE4590\_SMALL\_VS\_LARGE\_PRE\_BCELL\_UP  
GSE4590\_SMALL\_VS\_LARGE\_PRE\_BCELL\_UP  
149 -0.30970493 -1.2904173 0.05871212  
0.119878665 1 1487 "tags=21%, list=11%, signal=23%"  
GSE13522\_CTRL\_VS\_T\_CRUZI\_Y\_STRAIN\_INF\_SKIN\_BALBC\_MOUSE\_DN  
GSE13522\_CTRL\_VS\_T\_CRUZI\_Y\_STRAIN\_INF\_SKIN\_BALBC\_MOUSE\_DN  
94 -0.33534712 -1.290278 0.07293666  
0.119914964 1 2397 "tags=29%, list=17%, signal=34%"  
GSE9316\_IL6\_KO\_VS\_IFNG\_KO\_INVIVO\_EXPANDED\_CD4\_TCELL\_DN  
GSE9316\_IL6\_KO\_VS\_IFNG\_KO\_INVIVO\_EXPANDED\_CD4\_TCELL\_DN  
167 -0.3067865 -1.2896898 0.049056605  
0.12046123 1 1776 "tags=23%, list=13%, signal=26%"  
GSE29949\_MICROGLIA\_BRAIN\_VS\_MONOCYTE\_BONE\_MARROW\_DN  
GSE29949\_MICROGLIA\_BRAIN\_VS\_MONOCYTE\_BONE\_MARROW\_DN  
146 -0.31471592 -1.2895011 0.05950096  
0.12057587 1 1001 "tags=17%, list=7%, signal=18%"  
GSE8515\_CTRL\_VS\_IL1\_4H\_STIM\_MAC\_DN  
GSE8515\_CTRL\_VS\_IL1\_4H\_STIM\_MAC\_DN  
152 -0.31336576 -1.2884951 0.051526718  
0.12156887 1 2593 "tags=29%, list=18%, signal=35%"  
GSE40273\_XBP1\_KO\_VS\_WT\_TREG\_DN GSE40273\_XBP1\_KO\_VS\_WT\_TREG\_DN  
146 -0.31188282 -1.2881753 0.045454547  
0.12181306 1 1751 "tags=24%, list=12%, signal=27%"  
GSE40666\_STAT1\_KO\_VS\_STAT4\_KO\_CD8\_TCELL\_DN  
GSE40666\_STAT1\_KO\_VS\_STAT4\_KO\_CD8\_TCELL\_DN  
100 -0.32846916 -1.2873518 0.061657034  
0.12266773 1 3822 "tags=32%, list=27%, signal=44%"  
GSE17186\_MEMORY\_VS\_NAIVE\_BCELL\_UP GSE17186\_MEMORY\_VS\_NAIVE\_BCELL\_UP  
143 -0.30938908 -1.2860919 0.05490196  
0.124001555 1 1574 "tags=22%, list=11%, signal=25%"  
GSE29617\_CTRL\_VS\_DAY3\_TIV\_FLU\_VACCINE\_PBMC\_2008\_UP

GSE29617\_CTRL\_VS\_DAY3\_TIV\_FLU\_VACCINE\_PBMC\_2008\_UP  
117 -0.32331094 -1.2857876 0.065737054  
0.124243565 1 3196 "tags=34%, list=23%, signal=44%"  
GSE32255\_WT\_UNSTIM\_VS\_JMJD2D\_KNOCKDOWN\_4H\_LPS\_STIM\_DC\_DN  
GSE32255\_WT\_UNSTIM\_VS\_JMJD2D\_KNOCKDOWN\_4H\_LPS\_STIM\_DC\_DN  
139 -0.31348076 -1.2852949 0.05533597  
0.12468035 1 2085 "tags=24%, list=15%, signal=28%"  
GSE7348\_LPS\_VS\_TOLERIZED\_AND\_LPS\_STIM\_MACROPHAGE\_UP  
GSE7348\_LPS\_VS\_TOLERIZED\_AND\_LPS\_STIM\_MACROPHAGE\_UP  
141 -0.31021613 -1.2852092 0.04789272  
0.1246499 1 2098 "tags=23%, list=15%, signal=27%"  
GSE3982\_DC\_VS\_TH1\_UP GSE3982\_DC\_VS\_TH1\_UP  
142 -0.3076197 -1.2848339 0.053016454  
0.12494725 1 2648 "tags=27%, list=19%, signal=33%"  
GSE19198\_1H\_VS\_6H\_IL21\_TREATED\_TCELL\_DN  
GSE19198\_1H\_VS\_6H\_IL21\_TREATED\_TCELL\_DN  
167 -0.30101338 -1.2837803 0.05882353  
0.12604237 1 1790 "tags=21%, list=13%, signal=24%"  
GSE25123\_WT\_VS\_PPARG\_KO\_MACROPHAGE\_UP  
GSE25123\_WT\_VS\_PPARG\_KO\_MACROPHAGE\_UP  
138 -0.31671935 -1.283554 0.06902985 0.12615  
1 2037 "tags=25%, list=14%, signal=29%"  
GSE19825\_CD24LOW\_VS\_IL2RA\_HIGH\_DAY3\_EFF\_CD8\_TCELL\_UP  
GSE19825\_CD24LOW\_VS\_IL2RA\_HIGH\_DAY3\_EFF\_CD8\_TCELL\_UP  
142 -0.31502005 -1.2832822 0.053949904  
0.12633683 1 1752 "tags=25%, list=12%, signal=28%"  
GSE9650\_GP33\_VS\_GP276\_LCMV\_SPECIFIC\_EXHAUSTED\_CD8\_TCELL\_UP  
GSE9650\_GP33\_VS\_GP276\_LCMV\_SPECIFIC\_EXHAUSTED\_CD8\_TCELL\_UP  
177 -0.3004145 -1.283168 0.04323308  
0.12634265 1 4056 "tags=35%, list=29%, signal=49%"  
GSE23568\_CTRL\_TRANSDUCED\_VS\_WT\_CD8\_TCELL\_UP  
GSE23568\_CTRL\_TRANSDUCED\_VS\_WT\_CD8\_TCELL\_UP  
161 -0.30603424 -1.2823282 0.048732944  
0.12723951 1 2288 "tags=29%, list=16%, signal=34%"  
GSE24634\_TREG\_VS\_TCONV\_POST\_DAY3\_IL4\_CONVERSION\_DN  
GSE24634\_TREG\_VS\_TCONV\_POST\_DAY3\_IL4\_CONVERSION\_DN  
150 -0.31376666 -1.2819613 0.053435113  
0.1275526 1 3238 "tags=32%, list=23%, signal=41%"  
GSE4748\_CTRL\_VS\_CYANOBACTERIUM\_LPSLIKE\_STIM\_DC\_1H\_UP  
GSE4748\_CTRL\_VS\_CYANOBACTERIUM\_LPSLIKE\_STIM\_DC\_1H\_UP  
147 -0.30893272 -1.28072 0.054820415 0.12890549  
1 2210 "tags=25%, list=16%, signal=30%"  
GSE22919\_RESTING\_VS\_IL2\_IL12\_IL15\_STIM\_NK\_CELL\_DN  
GSE22919\_RESTING\_VS\_IL2\_IL12\_IL15\_STIM\_NK\_CELL\_DN  
137 -0.3098196 -1.280699 0.06367041  
0.12880406 1 2055 "tags=27%, list=15%, signal=31%"  
GSE360\_CTRL\_VS\_T\_GONDII\_DC\_DN GSE360\_CTRL\_VS\_T\_GONDII\_DC\_DN  
137 -0.31208947 -1.2806373 0.061068702  
0.12874646 1 1607 "tags=20%, list=11%, signal=23%"  
GSE7509\_DC\_VS\_MONOCYTE\_WITH\_FCGRIIB\_STIM\_DN  
GSE7509\_DC\_VS\_MONOCYTE\_WITH\_FCGRIIB\_STIM\_DN  
147 -0.3090092 -1.2799808 0.072407044  
0.12939063 1 1766 "tags=24%, list=13%, signal=27%"  
GSE41978\_ID2\_KO\_VS\_ID2\_KO\_AND\_BIM\_KO\_KLRG1\_LOW\_EFFECTOR\_CD8\_TCELL\_UP

GSE41978\_ID2\_KO\_VS\_ID2\_KO\_AND\_BIM\_KO\_KLRG1\_LOW\_EFFECTOR\_CD8\_TCELL\_UP  
161 -0.3068113 -1.2798074  
0.044198897 0.12947193 1 3244 "tags=26%,  
list=23%, signal=33%"  
GSE46606\_IRF4HIGH\_VS\_IRF4MID\_CD40L\_IL2\_IL5\_DAY3\_STIMULATED\_BCELL\_DN  
GSE46606\_IRF4HIGH\_VS\_IRF4MID\_CD40L\_IL2\_IL5\_DAY3\_STIMULATED\_BCELL\_DN  
132 -0.3135032 -1.2793934 0.06212425  
0.12983268 1 1098 "tags=17%, list=8%, signal=18%"  
GSE22886\_NAIVE\_BCELL\_VS\_NEUTROPHIL\_UP  
GSE22886\_NAIVE\_BCELL\_VS\_NEUTROPHIL\_UP  
118 -0.31560564 -1.2790552 0.059479553  
0.13011782 1 1145 "tags=17%, list=8%, signal=18%"  
GSE41867\_DAY8\_VS\_DAY15\_LCMV\_ARMSTRONG\_EFFECTOR\_CD8\_TCELL\_DN  
GSE41867\_DAY8\_VS\_DAY15\_LCMV\_ARMSTRONG\_EFFECTOR\_CD8\_TCELL\_DN  
93 -0.32953006 -1.2787627 0.07212476  
0.13034019 1 2295 "tags=19%, list=16%, signal=23%"  
GSE29618\_PRE\_VS\_DAY7\_FLU\_VACCINE\_MONOCYTE\_DN  
GSE29618\_PRE\_VS\_DAY7\_FLU\_VACCINE\_MONOCYTE\_DN  
125 -0.3195306 -1.2786528 0.057692308  
0.13034779 1 1724 "tags=21%, list=12%, signal=23%"  
GSE36476\_YOUNG\_VS\_OLD\_DONOR\_MEMORY\_CD4\_TCELL\_DN  
GSE36476\_YOUNG\_VS\_OLD\_DONOR\_MEMORY\_CD4\_TCELL\_DN  
134 -0.3120255 -1.2786413 0.058479533  
0.13022612 1 5234 "tags=50%, list=37%, signal=79%"  
GSE1460\_INTRATHYMIC\_T\_PROGENITOR\_VS\_DP\_THYMOCYTE\_DN  
GSE1460\_INTRATHYMIC\_T\_PROGENITOR\_VS\_DP\_THYMOCYTE\_DN  
149 -0.30649808 -1.2784046 0.049523808  
0.13038881 1 1807 "tags=17%, list=13%, signal=20%"  
GSE40666\_NAIVE\_VS\_EFFECTOR\_CD8\_TCELL\_DN  
GSE40666\_NAIVE\_VS\_EFFECTOR\_CD8\_TCELL\_DN  
143 -0.30873325 -1.2783146 0.04779412  
0.13035557 1 1498 "tags=20%, list=11%, signal=22%"  
GSE45365\_NK\_CELL\_VS\_CD11B\_DC\_DN GSE45365\_NK\_CELL\_VS\_CD11B\_DC\_DN  
156 -0.3047055 -1.2761308 0.045009784  
0.13285969 1 1349 "tags=21%, list=10%, signal=22%"  
GSE8921\_UNSTIM\_0H\_VS\_TLR1\_2\_STIM\_MONOCYTE\_12H\_DN  
GSE8921\_UNSTIM\_0H\_VS\_TLR1\_2\_STIM\_MONOCYTE\_12H\_DN  
141 -0.309427 -1.2759668 0.060037524  
0.13293174 1 2212 "tags=24%, list=16%, signal=28%"  
GSE17301\_CTRL\_VS\_48H\_IFNA2\_STIM\_CD8\_TCELL\_UP  
GSE17301\_CTRL\_VS\_48H\_IFNA2\_STIM\_CD8\_TCELL\_UP  
148 -0.30911875 -1.2758261 0.058708414  
0.13297671 1 1856 "tags=24%, list=13%, signal=27%"  
GSE360\_L\_DONOVANI\_VS\_M\_TUBERCULOSIS\_MAC\_DN  
GSE360\_L\_DONOVANI\_VS\_M\_TUBERCULOSIS\_MAC\_DN  
150 -0.3103373 -1.275475 0.054924242  
0.13329865 1 943 "tags=15%, list=7%, signal=16%"  
GSE9037\_CTRL\_VS\_LPS\_1H\_STIM\_IRAK4\_KO\_BMDM\_UP  
GSE9037\_CTRL\_VS\_LPS\_1H\_STIM\_IRAK4\_KO\_BMDM\_UP  
142 -0.31462774 -1.2754025 0.08256881  
0.13325174 1 3621 "tags=38%, list=26%, signal=51%"  
GSE15930\_NAIVE\_VS\_24H\_IN\_VITRO\_STIM\_CD8\_TCELL\_UP  
GSE15930\_NAIVE\_VS\_24H\_IN\_VITRO\_STIM\_CD8\_TCELL\_UP



159 -0.30683926 -1.2743063 0.06457564  
0.13446787 1 1462 "tags=18%, list=10%, signal=19%"  
GSE17974\_CTRL\_VS\_ACT\_IL4\_AND\_ANTI\_IL12\_0.5H\_CD4\_TCELL\_DN  
GSE17974\_CTRL\_VS\_ACT\_IL4\_AND\_ANTI\_IL12\_0.5H\_CD4\_TCELL\_DN  
114 -0.3203795 -1.2742707 0.07171315  
0.13437937 1 2177 "tags=25%, list=15%, signal=30%"  
GSE22443\_NAIVE\_VS\_ACT\_AND\_IL2\_TREATED\_CD8\_TCELL\_DN  
GSE22443\_NAIVE\_VS\_ACT\_AND\_IL2\_TREATED\_CD8\_TCELL\_DN  
157 -0.3048294 -1.2741368 0.050290134  
0.1344336 1 4250 "tags=31%, list=30%, signal=44%"  
GSE17974\_CTRL\_VS\_ACT\_IL4\_AND\_ANTI\_IL12\_1H\_CD4\_TCELL\_DN  
GSE17974\_CTRL\_VS\_ACT\_IL4\_AND\_ANTI\_IL12\_1H\_CD4\_TCELL\_DN  
123 -0.31584957 -1.2738124 0.06410257 0.134747  
1 3149 "tags=31%, list=22%, signal=39%"  
GSE32423\_CTRL\_VS\_IL7\_IL4\_MEMORY\_CD8\_TCELL\_UP  
GSE32423\_CTRL\_VS\_IL7\_IL4\_MEMORY\_CD8\_TCELL\_UP  
148 -0.30688134 -1.2736496 0.064638786  
0.13481912 1 1585 "tags=20%, list=11%, signal=23%"  
GSE29614\_CTRL\_VS\_DAY7\_TIV\_FLU\_VACCINE\_PBMC\_UP  
GSE29614\_CTRL\_VS\_DAY7\_TIV\_FLU\_VACCINE\_PBMC\_UP  
100 -0.32845134 -1.2734251 0.08943089  
0.13494484 1 4638 "tags=43%, list=33%, signal=64%"  
GSE46606\_UNSTIM\_VS\_CD40L\_IL2\_IL5\_1DAY\_STIMULATED\_IRF4\_KO\_BCELL\_DN  
GSE46606\_UNSTIM\_VS\_CD40L\_IL2\_IL5\_1DAY\_STIMULATED\_IRF4\_KO\_BCELL\_DN  
135 -0.31017658 -1.2730248 0.075925924  
0.13533841 1 900 "tags=17%, list=6%, signal=18%"  
GSE40274\_CTRL\_VS\_FOXP3\_AND\_IRF4\_TRANSDUCE\_ACTIVATED\_CD4\_TCELL\_DN  
GSE40274\_CTRL\_VS\_FOXP3\_AND\_IRF4\_TRANSDUCE\_ACTIVATED\_CD4\_TCELL\_DN  
119 -0.31434646 -1.2727728 0.083984375  
0.13549381 1 2735 "tags=32%, list=19%, signal=39%"  
GSE13411\_SWITCHED\_MEMORY\_BCELL\_VS\_PLASMA\_CELL\_UP  
GSE13411\_SWITCHED\_MEMORY\_BCELL\_VS\_PLASMA\_CELL\_UP  
136 -0.31291562 -1.2724725 0.06563707  
0.13573918 1 1483 "tags=20%, list=11%, signal=22%"  
GSE40685\_TREG\_VS\_FOXP3\_KO\_TREG\_PRECURSOR\_DN  
GSE40685\_TREG\_VS\_FOXP3\_KO\_TREG\_PRECURSOR\_DN  
129 -0.31225106 -1.272339 0.06187625 0.135764  
1 1829 "tags=22%, list=13%, signal=26%"  
GSE29164\_UNTREATED\_VS\_CD8\_TCELL\_AND\_IL12\_TREATED\_MELANOMA\_DAY7\_DN  
GSE29164\_UNTREATED\_VS\_CD8\_TCELL\_AND\_IL12\_TREATED\_MELANOMA\_DAY7\_DN  
145 -0.30841437 -1.271188 0.059160307  
0.13703036 1 1813 "tags=19%, list=13%, signal=22%"  
GSE19198\_6H\_VS\_24H\_IL21\_TREATED\_TCELL\_DN  
GSE19198\_6H\_VS\_24H\_IL21\_TREATED\_TCELL\_DN  
139 -0.30961862 -1.2697952 0.0625 0.13867834  
1 2259 "tags=24%, list=16%, signal=28%"  
GSE23321\_CENTRAL\_VS\_EFFECTOR\_MEMORY\_CD8\_TCELL\_UP  
GSE23321\_CENTRAL\_VS\_EFFECTOR\_MEMORY\_CD8\_TCELL\_UP  
156 -0.30360964 -1.2696015 0.056092843  
0.13880548 1 1588 "tags=20%, list=11%, signal=22%"  
GSE1925\_CTRL\_VS\_IFNG\_PRIMED\_MACROPHAGE\_24H\_IFNG\_STIM\_UP  
GSE1925\_CTRL\_VS\_IFNG\_PRIMED\_MACROPHAGE\_24H\_IFNG\_STIM\_UP  
154 -0.30674177 -1.2695086 0.065476194  
0.13879974 1 1270 "tags=17%, list=9%, signal=18%"

GSE26488\_CTRL\_VS\_PEPTIDE\_INJECTION\_HDAC7\_DELTAP\_TG\_OT2\_THYMOCYTE\_DN  
GSE26488\_CTRL\_VS\_PEPTIDE\_INJECTION\_HDAC7\_DELTAP\_TG\_OT2\_THYMOCYTE\_DN  
161 -0.30021644 -1.269358 0.042307694  
0.13887548 1 2327 "tags=29%, list=16%, signal=35%"  
GSE13522\_CTRL\_VS\_T\_CRUZI\_Y\_STRAIN\_INF\_SKIN\_129\_MOUSE\_UP  
GSE13522\_CTRL\_VS\_T\_CRUZI\_Y\_STRAIN\_INF\_SKIN\_129\_MOUSE\_UP  
96 -0.32827666 -1.2693546 0.073033705  
0.13874231 1 4211 "tags=34%, list=30%, signal=49%"  
GSE28737\_WT\_VS\_BCL6\_HET\_MARGINAL\_ZONE\_BCELL\_DN  
GSE28737\_WT\_VS\_BCL6\_HET\_MARGINAL\_ZONE\_BCELL\_DN  
132 -0.31308562 -1.2691503 0.06792453  
0.13889554 1 2433 "tags=29%, list=17%, signal=34%"  
GSE22886\_NAIVE\_CD8\_TCELL\_VS\_MONOCYTE\_UP  
GSE22886\_NAIVE\_CD8\_TCELL\_VS\_MONOCYTE\_UP  
148 -0.3112072 -1.2690803 0.063432835  
0.13885559 1 1837 "tags=20%, list=13%, signal=23%"  
GSE2770\_TGFB\_AND\_IL4\_ACT\_VS\_ACT\_CD4\_TCELL\_2H\_DN  
GSE2770\_TGFB\_AND\_IL4\_ACT\_VS\_ACT\_CD4\_TCELL\_2H\_DN  
135 -0.3124023 -1.26904 0.060661763 0.13877182  
1 1704 "tags=22%, list=12%, signal=25%"  
GSE37534\_GW1929\_VS\_ROSIGLITAZONE\_TREATED\_CD4\_TCELL\_PPARG1\_FOXP3\_TRAN  
SDUCED\_DN  
GSE37534\_GW1929\_VS\_ROSIGLITAZONE\_TREATED\_CD4\_TCELL\_PPARG1\_FOXP3\_TRAN  
SDUCED\_DN 117 -0.3135131 -1.2689575  
0.061594203 0.13872877 1 1766 "tags=25%,  
list=13%, signal=28%"  
GSE18804\_SPLEEN\_MACROPHAGE\_VS\_BRAIN\_TUMORAL\_MACROPHAGE\_UP  
GSE18804\_SPLEEN\_MACROPHAGE\_VS\_BRAIN\_TUMORAL\_MACROPHAGE\_UP  
132 -0.3114846 -1.268467 0.07635009  
0.1392013 1 2685 "tags=30%, list=19%, signal=36%"  
GSE18893\_TCONV\_VS\_TREG\_24H\_CULTURE\_UP  
GSE18893\_TCONV\_VS\_TREG\_24H\_CULTURE\_UP  
158 -0.3018386 -1.2684549 0.053892214  
0.13908422 1 2279 "tags=28%, list=16%, signal=34%"  
GSE9960\_HEALTHY\_VS\_GRAM\_POS\_SEPSIS\_PBMC\_DN  
GSE9960\_HEALTHY\_VS\_GRAM\_POS\_SEPSIS\_PBMC\_DN  
128 -0.31135184 -1.2683945 0.07495429  
0.13902122 1 2276 "tags=26%, list=16%, signal=30%"  
GSE19198\_6H\_VS\_24H\_IL21\_TREATED\_TCELL\_UP  
GSE19198\_6H\_VS\_24H\_IL21\_TREATED\_TCELL\_UP  
137 -0.308844 -1.2683126 0.0726257  
0.13899148 1 2215 "tags=22%, list=16%, signal=26%"  
GSE17721\_POLYIC\_VS\_CPG\_1H\_BMDC\_DN GSE17721\_POLYIC\_VS\_CPG\_1H\_BMDC\_DN  
164 -0.30158034 -1.2681521 0.06569343  
0.13907379 1 1814 "tags=20%, list=13%, signal=23%"  
GSE43863\_TH1\_VS\_TFH\_MEMORY\_CD4\_TCELL\_DN  
GSE43863\_TH1\_VS\_TFH\_MEMORY\_CD4\_TCELL\_DN  
160 -0.30361947 -1.2679529 0.07037037  
0.13919206 1 1295 "tags=22%, list=9%, signal=24%"  
GSE3982\_DC\_VS\_EFF\_MEMORY\_CD4\_TCELL\_DN  
GSE3982\_DC\_VS\_EFF\_MEMORY\_CD4\_TCELL\_DN  
121 -0.31782898 -1.2677292 0.071969695  
0.13932514 1 331 "tags=9%, list=2%, signal=9%"  
GSE17721\_LPS\_VS\_PAM3CSK4\_1H\_BMDC\_DN

GSE17721\_LPS\_VS\_PAM3CSK4\_1H\_BMDC\_DN  
160 -0.3032803 -1.2675611 0.061797753  
0.13940375 1 2720 "tags=25%, list=19%, signal=31%"  
GSE43955\_TH0\_VS\_TGFB\_IL6\_TH17\_ACT\_CD4\_TCELL\_20H\_DN  
GSE43955\_TH0\_VS\_TGFB\_IL6\_TH17\_ACT\_CD4\_TCELL\_20H\_DN  
161 -0.302291 -1.2674441 0.053016454  
0.1394072 1 1852 "tags=20%, list=13%, signal=23%"  
GSE37301\_PRO\_BCELL\_VS\_RAG2\_KO\_NK\_CELL\_DN  
GSE37301\_PRO\_BCELL\_VS\_RAG2\_KO\_NK\_CELL\_DN  
149 -0.30488768 -1.2670354 0.06936416  
0.13977455 1 1779 "tags=27%, list=13%, signal=30%"  
GSE17721\_CTRL\_VS\_POLYIC\_2H\_BMDC\_UP  
GSE17721\_CTRL\_VS\_POLYIC\_2H\_BMDC\_UP  
147 -0.30653176 -1.2669696 0.060546875  
0.13972118 1 1317 "tags=17%, list=9%, signal=19%"  
GSE20715\_0H\_VS\_24H\_OZONE\_TLR4\_KO\_LUNG\_UP  
GSE20715\_0H\_VS\_24H\_OZONE\_TLR4\_KO\_LUNG\_UP  
161 -0.30441982 -1.266534 0.05586592  
0.14016952 1 1736 "tags=23%, list=12%, signal=26%"  
GSE19512\_NAUTRAL\_VS\_INDUCED\_TREG\_UP  
GSE19512\_NAUTRAL\_VS\_INDUCED\_TREG\_UP  
151 -0.30674654 -1.2663212 0.07168459  
0.14031713 1 3735 "tags=35%, list=26%, signal=47%"  
GSE24634\_IL4\_VS\_CTRL\_TREATED\_NAIVE\_CD4\_TCELL\_DAY3\_DN  
GSE24634\_IL4\_VS\_CTRL\_TREATED\_NAIVE\_CD4\_TCELL\_DAY3\_DN  
143 -0.30882522 -1.2660785 0.064327486  
0.14049752 1 1347 "tags=20%, list=10%, signal=22%"  
GSE360\_L\_DONOVANI\_VS\_L\_MAJOR\_MAC\_DN  
GSE360\_L\_DONOVANI\_VS\_L\_MAJOR\_MAC\_DN  
148 -0.30992928 -1.2657213 0.061657034  
0.14085236 1 1130 "tags=18%, list=8%, signal=20%"  
GSE32423\_MEMORY\_VS\_NAIVE\_CD8\_TCELL\_IL7\_IL4\_UP  
GSE32423\_MEMORY\_VS\_NAIVE\_CD8\_TCELL\_IL7\_IL4\_UP  
142 -0.30612996 -1.2652612 0.06428572  
0.14129588 1 3645 "tags=30%, list=26%, signal=40%"  
GSE40441\_NRP1\_POS\_INDUCED\_TREG\_VS\_NRP1\_NEG\_NATURAL\_TREG\_DN  
GSE40441\_NRP1\_POS\_INDUCED\_TREG\_VS\_NRP1\_NEG\_NATURAL\_TREG\_DN  
158 -0.29999483 -1.2649543 0.05950096  
0.14152552 1 1694 "tags=18%, list=12%, signal=21%"  
GSE27786\_LIN\_NEG\_VS\_CD8\_TCELL\_DN GSE27786\_LIN\_NEG\_VS\_CD8\_TCELL\_DN  
149 -0.30368152 -1.2647946 0.073076926  
0.14160122 1 1480 "tags=18%, list=10%, signal=20%"  
GSE19198\_CTRL\_VS\_IL21\_TREATED\_TCELL\_1H\_DN  
GSE19198\_CTRL\_VS\_IL21\_TREATED\_TCELL\_1H\_DN  
143 -0.3064522 -1.2646135 0.07102804  
0.14170611 1 3815 "tags=40%, list=27%, signal=54%"  
GSE13485\_DAY7\_VS\_DAY21\_YF17D\_VACCINE\_PBMCDN  
GSE13485\_DAY7\_VS\_DAY21\_YF17D\_VACCINE\_PBMCDN  
97 -0.32626063 -1.2642993 0.09126984  
0.14199854 1 5692 "tags=51%, list=40%, signal=84%"  
GSE20715\_0H\_VS\_6H\_OZONE\_LUNG\_DN GSE20715\_0H\_VS\_6H\_OZONE\_LUNG\_DN  
160 -0.30299518 -1.2637998 0.06584362  
0.14250632 1 2310 "tags=20%, list=16%, signal=24%"  
GSE32901\_NAIVE\_VS\_TH1\_CD4\_TCELL\_UP

GSE32901\_NAIVE\_VS\_TH1\_CD4\_TCELL\_UP  
96 -0.32867342 -1.2637093 0.09248555  
0.14249532 1 1865 "tags=23%, list=13%, signal=26%"  
GSE21546\_WT\_VS\_SAP1A\_KO\_ANTI\_CD3\_STIM\_DP\_THYMOCYTES\_DN  
GSE21546\_WT\_VS\_SAP1A\_KO\_ANTI\_CD3\_STIM\_DP\_THYMOCYTES\_DN  
138 -0.30822095 -1.2635617 0.05667276  
0.14254676 1 1366 "tags=17%, list=10%, signal=19%"  
GSE17186\_MEMORY\_VS\_CD21HIGH\_TRANSITIONAL\_BCELL\_UP  
GSE17186\_MEMORY\_VS\_CD21HIGH\_TRANSITIONAL\_BCELL\_UP  
146 -0.3052136 -1.263413 0.068571426  
0.14260909 1 2207 "tags=24%, list=16%, signal=28%"  
GSE36078\_UNTREATED\_VS\_AD5\_T425A\_HEXON\_INF\_IL1R\_KO\_MOUSE\_LUNG\_DC\_UP  
GSE36078\_UNTREATED\_VS\_AD5\_T425A\_HEXON\_INF\_IL1R\_KO\_MOUSE\_LUNG\_DC\_UP  
135 -0.3128045 -1.2628012 0.0655106  
0.14325823 1 5149 "tags=47%, list=36%, signal=73%"  
GSE17186\_NAIVE\_VS\_CD21LOW\_TRANSITIONAL\_BCELL\_DN  
GSE17186\_NAIVE\_VS\_CD21LOW\_TRANSITIONAL\_BCELL\_DN  
124 -0.3133104 -1.2622676 0.08143939  
0.14384478 1 1737 "tags=24%, list=12%, signal=27%"  
GSE12839\_CTRL\_VS\_IL12\_TREATED\_PBMC\_DN  
GSE12839\_CTRL\_VS\_IL12\_TREATED\_PBMC\_DN  
86 -0.32778546 -1.2622622 0.09191176  
0.1437108 1 4143 "tags=36%, list=29%, signal=51%"  
GSE3039\_ALPHABETA\_CD8\_TCELL\_VS\_B2\_BCELL\_UP  
GSE3039\_ALPHABETA\_CD8\_TCELL\_VS\_B2\_BCELL\_UP  
145 -0.3059947 -1.2622076 0.07517482  
0.14364807 1 2496 "tags=26%, list=18%, signal=32%"  
GSE11818\_WT\_VS\_DICER\_KO\_TREG\_UP GSE11818\_WT\_VS\_DICER\_KO\_TREG\_UP  
116 -0.31267577 -1.2619511 0.06095238  
0.14384285 1 3351 "tags=26%, list=24%, signal=34%"  
GSE40274\_CTRL\_VS\_XBP1\_TRANSDUCED\_ACTIVATED\_CD4\_TCELL\_UP  
GSE40274\_CTRL\_VS\_XBP1\_TRANSDUCED\_ACTIVATED\_CD4\_TCELL\_UP  
136 -0.30839637 -1.2617928 0.06849315  
0.14391002 1 1829 "tags=22%, list=13%, signal=25%"  
GSE24634\_TEFF\_VS\_TCONV\_DAY5\_IN\_CULTURE\_DN  
GSE24634\_TEFF\_VS\_TCONV\_DAY5\_IN\_CULTURE\_DN  
125 -0.31369767 -1.261789 0.08384458  
0.14377402 1 1766 "tags=22%, list=13%, signal=24%"  
GSE25088\_CTRL\_VS\_ROSIGLITAZONE\_STIM\_MACROPHAGE\_UP  
GSE25088\_CTRL\_VS\_ROSIGLITAZONE\_STIM\_MACROPHAGE\_UP  
138 -0.30458635 -1.2617469 0.05839416  
0.14368811 1 1946 "tags=25%, list=14%, signal=29%"  
GSE3982\_MAC\_VS\_BCELL\_UP GSE3982\_MAC\_VS\_BCELL\_UP  
161 -0.3016513 -1.2612003 0.054104477  
0.14425786 1 720 "tags=15%, list=5%, signal=16%"  
GSE40443\_INDUCED\_VS\_TOTAL\_TREG\_DN GSE40443\_INDUCED\_VS\_TOTAL\_TREG\_DN  
136 -0.3074402 -1.2607272 0.09193246  
0.14473122 1 1067 "tags=18%, list=8%, signal=20%"  
GSE11961\_MEMORY\_BCELL\_DAY7\_VS\_MEMORY\_BCELL\_DAY40\_DN  
GSE11961\_MEMORY\_BCELL\_DAY7\_VS\_MEMORY\_BCELL\_DAY40\_DN  
147 -0.3083153 -1.2607205 0.06743738  
0.14460695 1 2547 "tags=30%, list=18%, signal=36%"  
GSE8921\_UNSTIM\_0H\_VS\_TLR1\_2\_STIM\_MONOCYTE\_24H\_DN  
GSE8921\_UNSTIM\_0H\_VS\_TLR1\_2\_STIM\_MONOCYTE\_24H\_DN

|                                                                         |             |                                                                         |                                       |
|-------------------------------------------------------------------------|-------------|-------------------------------------------------------------------------|---------------------------------------|
| 151                                                                     | -0.30196738 | -1.260643                                                               | 0.06581353                            |
| 0.14457493                                                              | 1           | 1922                                                                    | "tags=24%, list=14%, signal=27%"      |
| GSE2585_CTEC_VS_MTEC_THYMUS_DN                                          |             | GSE2585_CTEC_VS_MTEC_THYMUS_DN                                          |                                       |
| 139                                                                     | -0.30542955 | -1.2603799                                                              | 0.04819277                            |
| 0.1447843                                                               | 1           | 1871                                                                    | "tags=22%, list=13%, signal=25%"      |
| GSE43863_TFH_VS_LY6C_LOW_CXCR5NEG_EFFECTOR_CD4_TCELL_UP                 |             | GSE43863_TFH_VS_LY6C_LOW_CXCR5NEG_EFFECTOR_CD4_TCELL_UP                 |                                       |
| 148                                                                     | -0.30563176 | -1.2603782                                                              | 0.053030305                           |
| 0.14464761                                                              | 1           | 1445                                                                    | "tags=21%, list=10%, signal=23%"      |
| GSE4984_UNTREATED_VS_GALECTIN1_TREATED_DC_DN                            |             | GSE4984_UNTREATED_VS_GALECTIN1_TREATED_DC_DN                            |                                       |
| 121                                                                     | -0.3151856  | -1.2591449                                                              | 0.08560311                            |
| 0.1461017                                                               | 1           | 1409                                                                    | "tags=20%, list=10%, signal=22%"      |
| GSE17721_CTRL_VS_GARDIQUIMOD_1H_BMDC_DN                                 |             | GSE17721_CTRL_VS_GARDIQUIMOD_1H_BMDC_DN                                 |                                       |
| 156                                                                     | -0.2989484  | -1.2574184                                                              | 0.06138614                            |
| 0.1482526                                                               | 1           | 1727                                                                    | "tags=20%, list=12%, signal=22%"      |
| GSE9988_ANTI_TREM1_VS_VEHICLE_TREATED_MONOCYTES_UP                      |             | GSE9988_ANTI_TREM1_VS_VEHICLE_TREATED_MONOCYTES_UP                      |                                       |
| 135                                                                     | -0.31097436 | -1.2573432                                                              | 0.07438017                            |
| 0.14820392                                                              | 1           | 1926                                                                    | "tags=22%, list=14%, signal=25%"      |
| GSE1791_CTRL_VS_NEUROMEDINU_IN_T_CELL_LINE_0.8H_DN                      |             | GSE1791_CTRL_VS_NEUROMEDINU_IN_T_CELL_LINE_0.8H_DN                      |                                       |
| 115                                                                     | -0.31490934 | -1.2572455                                                              | 0.103846155                           |
| 0.14819887                                                              | 1           | 1770                                                                    | "tags=21%, list=13%, signal=24%"      |
| GSE12845_NAIVE_VS_DARKZONE_GC_TONSIL_BCELL_UP                           |             | GSE12845_NAIVE_VS_DARKZONE_GC_TONSIL_BCELL_UP                           |                                       |
| 133                                                                     | -0.30715427 | -1.2568986                                                              | 0.06614786                            |
| 0.1485246                                                               | 1           | 3663                                                                    | "tags=37%, list=26%, signal=49%"      |
| GSE5679_PPARG_LIGAND_ROSIGLITAZONE_VS_RARA_AAGONIST_AM580_TREATED_DC_DN |             | GSE5679_PPARG_LIGAND_ROSIGLITAZONE_VS_RARA_AAGONIST_AM580_TREATED_DC_DN |                                       |
| 146                                                                     | -0.30425364 | -1.2565835                                                              |                                       |
| 0.071969695                                                             | 0.14881323  | 1                                                                       | 2236 "tags=27%, list=16%, signal=31%" |
| GSE43863_NAIVE_VS_MEMORY_LY6C_INT_CXCR5POS_CD4_TCELL_D150_LCMV_UP       |             | GSE43863_NAIVE_VS_MEMORY_LY6C_INT_CXCR5POS_CD4_TCELL_D150_LCMV_UP       |                                       |
| 143                                                                     | -0.30844343 | -1.2565106                                                              | 0.088                                 |
| 0.14877929                                                              | 1           | 1698                                                                    | "tags=25%, list=12%, signal=28%"      |
| GSE2706_2H_VS_8H_LPS_STIM_DC_UP                                         |             | GSE2706_2H_VS_8H_LPS_STIM_DC_UP                                         |                                       |
| 146                                                                     | -0.30534402 | -1.2564396                                                              | 0.082                                 |
| 0.14873588                                                              | 1           | 2113                                                                    | "tags=24%, list=15%, signal=28%"      |
| GSE11961_GERMINAL_CENTER_BCELL_DAY7_VS_PLASMA_CELL_DAY7_DN              |             | GSE11961_GERMINAL_CENTER_BCELL_DAY7_VS_PLASMA_CELL_DAY7_DN              |                                       |
| 143                                                                     | -0.30552873 | -1.2561074                                                              | 0.07279693                            |
| 0.14904222                                                              | 1           | 1800                                                                    | "tags=27%, list=13%, signal=30%"      |
| GSE36476_CTRL_VS_TSST_ACT_40H_MEMORY_CD4_TCELL_OLD_UP                   |             | GSE36476_CTRL_VS_TSST_ACT_40H_MEMORY_CD4_TCELL_OLD_UP                   |                                       |
| 126                                                                     | -0.31412303 | -1.2557474                                                              | 0.098148145                           |
| 0.14941436                                                              | 1           | 1996                                                                    | "tags=21%, list=14%, signal=25%"      |
| GSE3982_EOSINOPHIL_VS_NKCELL_UP                                         |             | GSE3982_EOSINOPHIL_VS_NKCELL_UP                                         |                                       |
| 152                                                                     | -0.3028532  | -1.2554344                                                              | 0.072407044                           |
| 0.14969142                                                              | 1           | 2648                                                                    | "tags=25%, list=19%, signal=30%"      |
| GSE13522_CTRL_VS_T_CRUZI_Y_STRAIN_INF_SKIN_IFNAR_KO_DN                  |             | GSE13522_CTRL_VS_T_CRUZI_Y_STRAIN_INF_SKIN_IFNAR_KO_DN                  |                                       |

GSE13522\_CTRL\_VS\_T\_CRUZI\_Y\_STRAIN\_INF\_SKIN\_IFNAR\_KO\_DN  
149 -0.29948694 -1.254991 0.07114624  
0.15015528 1 1498 "tags=19%, list=11%, signal=22%"  
GSE22611\_MUTANT\_NOD2\_TRANSDUCECD\_VS\_CTRL\_HEK293T\_STIMULATED\_WITH\_MDP\_6H\_UP  
GSE22611\_MUTANT\_NOD2\_TRANSDUCECD\_VS\_CTRL\_HEK293T\_STIMULATED\_WITH\_MDP\_6H\_UP  
137 -0.30486402 -1.2548347  
0.060661763 0.15020652 1 1770 "tags=18%, list=13%, signal=21%"  
GSE20484\_MCSG\_VS\_CXCL4\_MONOCYTE\_DERIVED\_MACROPHAGE\_DN  
GSE20484\_MCSG\_VS\_CXCL4\_MONOCYTE\_DERIVED\_MACROPHAGE\_DN  
122 -0.3167839 -1.2530364 0.08851224  
0.15252909 1 1371 "tags=17%, list=10%, signal=19%"  
GSE22886\_NAIVE\_VS\_IGG\_IGA\_MEMORY\_BCELL\_UP  
GSE22886\_NAIVE\_VS\_IGG\_IGA\_MEMORY\_BCELL\_UP  
138 -0.3048553 -1.2524573 0.07285974  
0.15314402 1 3350 "tags=32%, list=24%, signal=41%"  
GSE10325\_CD4\_TCELL\_VS\_BCELL\_DN GSE10325\_CD4\_TCELL\_VS\_BCELL\_DN  
130 -0.31016397 -1.2517688 0.07509158  
0.15389352 1 2288 "tags=27%, list=16%, signal=32%"  
GSE35825\_UNTREATED\_VS\_IFNG\_STIM\_MACROPHAGE\_UP  
GSE35825\_UNTREATED\_VS\_IFNG\_STIM\_MACROPHAGE\_UP  
157 -0.30312276 -1.2514782 0.07115385  
0.15416351 1 1766 "tags=22%, list=13%, signal=24%"  
GSE29618\_MONOCYTE\_VS\_PDC\_DAY7\_FLU\_VACCINE\_UP  
GSE29618\_MONOCYTE\_VS\_PDC\_DAY7\_FLU\_VACCINE\_UP  
151 -0.30299535 -1.2508626 0.067961164  
0.15487604 1 1277 "tags=19%, list=9%, signal=21%"  
GSE360\_L\_MAJOR\_VS\_B\_MALAYI\_LOW\_DOSE\_DC\_UP  
GSE360\_L\_MAJOR\_VS\_B\_MALAYI\_LOW\_DOSE\_DC\_UP  
154 -0.30077085 -1.2506328 0.07948244  
0.15501647 1 1498 "tags=19%, list=11%, signal=21%"  
GSE21063\_CTRL\_VS\_ANTI\_IGM\_STIM\_BCELL\_3H\_UP  
GSE21063\_CTRL\_VS\_ANTI\_IGM\_STIM\_BCELL\_3H\_UP  
119 -0.31174642 -1.2504581 0.08829175  
0.1551145 1 2174 "tags=25%, list=15%, signal=30%"  
GSE37534\_UNTREATED\_VS\_GW1929\_TREATED\_CD4\_TCELL\_PPARG1\_AND\_FOXP3\_TRANSDUCED\_UP  
GSE37534\_UNTREATED\_VS\_GW1929\_TREATED\_CD4\_TCELL\_PPARG1\_AND\_FOXP3\_TRANSDUCED\_UP  
150 -0.30410329 -1.2503356  
0.07238095 0.1551393 1 1867 "tags=24%, list=13%, signal=27%"  
GSE37336\_LY6C\_POS\_VS\_NEG\_NAIVE\_CD4\_TCELL\_UP  
GSE37336\_LY6C\_POS\_VS\_NEG\_NAIVE\_CD4\_TCELL\_UP  
110 -0.31669837 -1.250283 0.07927928  
0.15506484 1 3664 "tags=32%, list=26%, signal=43%"  
GSE4590\_LARGE\_PRE\_BCELL\_VS\_VPREB\_POS\_LARGE\_PRE\_BCELL\_DN  
GSE4590\_LARGE\_PRE\_BCELL\_VS\_VPREB\_POS\_LARGE\_PRE\_BCELL\_DN  
142 -0.30570525 -1.250025 0.073033705  
0.15528305 1 2170 "tags=25%, list=15%, signal=29%"  
GSE22601\_DOUBLE\_POSITIVE\_VS\_CD8\_SINGLE\_POSITIVE\_THYMOCYTE\_UP  
GSE22601\_DOUBLE\_POSITIVE\_VS\_CD8\_SINGLE\_POSITIVE\_THYMOCYTE\_UP  
140 -0.30748403 -1.249832 0.087649405  
0.1553982 1 1719 "tags=21%, list=12%, signal=23%"

GSE8921\_UNSTIM\_VS\_TLR1\_2\_STIM\_MONOCYTE\_12H\_UP  
GSE8921\_UNSTIM\_VS\_TLR1\_2\_STIM\_MONOCYTE\_12H\_UP  
150 -0.30288365 -1.2493008 0.06403013  
0.15600306 1 1744 "tags=21%, list=12%, signal=23%"  
GSE339\_CD8POS\_VS\_CD4CD8DN\_DC\_DN GSE339\_CD8POS\_VS\_CD4CD8DN\_DC\_DN  
160 -0.2999063 -1.24865 0.073126145  
0.15676595 1 1736 "tags=21%, list=12%, signal=24%"  
GSE18281\_CORTICAL\_VS\_MEDULLARY\_THYMOCYTE\_DN  
GSE18281\_CORTICAL\_VS\_MEDULLARY\_THYMOCYTE\_DN  
139 -0.30776468 -1.2484633 0.09222423  
0.15685679 1 1842 "tags=17%, list=13%, signal=19%"  
GSE19888\_ADENOSINE\_A3R\_INH\_VS\_TCELL\_MEMBRANES\_ACT\_MAST\_CELL\_UP  
GSE19888\_ADENOSINE\_A3R\_INH\_VS\_TCELL\_MEMBRANES\_ACT\_MAST\_CELL\_UP  
136 -0.30563617 -1.2480031 0.077634014  
0.15736148 1 1766 "tags=23%, list=13%, signal=26%"  
GSE36476\_CTRL\_VS\_TSST\_ACT\_40H\_MEMORY\_CD4\_TCELL\_YOUNG\_UP  
GSE36476\_CTRL\_VS\_TSST\_ACT\_40H\_MEMORY\_CD4\_TCELL\_YOUNG\_UP  
134 -0.30659455 -1.2478414 0.07372401  
0.15743329 1 1719 "tags=24%, list=12%, signal=27%"  
GSE18203\_CTRL\_VS\_INTRATUMORAL\_CPG\_INJ\_MC38\_TUMOR\_UP  
GSE18203\_CTRL\_VS\_INTRATUMORAL\_CPG\_INJ\_MC38\_TUMOR\_UP  
147 -0.29905704 -1.2477186 0.061913695  
0.15746933 1 1279 "tags=17%, list=9%, signal=19%"  
GSE6259\_FLT3L\_INDUCED\_DEC205\_POS\_DC\_VS\_BCELL\_UP  
GSE6259\_FLT3L\_INDUCED\_DEC205\_POS\_DC\_VS\_BCELL\_UP  
119 -0.3042479 -1.247619 0.09881423  
0.15746534 1 2385 "tags=24%, list=17%, signal=29%"  
GSE42021\_CD24HI\_VS\_CD24LOW\_TCONV\_THYMUS\_DN  
GSE42021\_CD24HI\_VS\_CD24LOW\_TCONV\_THYMUS\_DN  
141 -0.30616754 -1.247485 0.08997955  
0.15750702 1 2215 "tags=28%, list=16%, signal=33%"  
GSE7348\_UNSTIM\_VS\_TOLERIZED\_AND\_LPS\_STIM\_MACROPHAGE\_UP  
GSE7348\_UNSTIM\_VS\_TOLERIZED\_AND\_LPS\_STIM\_MACROPHAGE\_UP  
118 -0.31390458 -1.2471135 0.09039548  
0.15784734 1 2918 "tags=31%, list=21%, signal=38%"  
GSE6681\_DELETED\_FOXP3\_VS\_WT\_TREG\_UP  
GSE6681\_DELETED\_FOXP3\_VS\_WT\_TREG\_UP  
129 -0.30782005 -1.2470199 0.079303674  
0.15783529 1 2648 "tags=18%, list=19%, signal=22%"  
GSE19888\_CTRL\_VS\_T\_CELL\_MEMBRANES\_ACT\_MAST\_CELL\_DN  
GSE19888\_CTRL\_VS\_T\_CELL\_MEMBRANES\_ACT\_MAST\_CELL\_DN  
148 -0.30050495 -1.2467533 0.060037524  
0.15802519 1 2372 "tags=23%, list=17%, signal=27%"  
GSE19923\_E2A\_KO\_VS\_HEB\_AND\_E2A\_KO\_DP\_THYMOCYTE\_DN  
GSE19923\_E2A\_KO\_VS\_HEB\_AND\_E2A\_KO\_DP\_THYMOCYTE\_DN  
114 -0.3112518 -1.2466048 0.09608541  
0.15808961 1 4525 "tags=39%, list=32%, signal=56%"  
GSE14026\_TH1\_VS\_TH17\_DN GSE14026\_TH1\_VS\_TH17\_DN  
143 -0.30194935 -1.2465669 0.09266409  
0.15800482 1 2732 "tags=24%, list=19%, signal=30%"  
GSE3982\_BCELL\_VS\_EFF\_MEMORY\_CD4\_TCELL\_UP  
GSE3982\_BCELL\_VS\_EFF\_MEMORY\_CD4\_TCELL\_UP  
140 -0.30275428 -1.2463081 0.07581227  
0.15819588 1 2133 "tags=21%, list=15%, signal=24%"

GSE9960\_GRAM\_NEG\_VS\_GRAM\_POS\_SEPSIS\_PBMC\_DN  
GSE9960\_GRAM\_NEG\_VS\_GRAM\_POS\_SEPSIS\_PBMC\_DN  
138 -0.30239713 -1.2458395 0.0626186  
0.1587343 1 1196 "tags=17%, list=8%, signal=19%"  
GSE45365\_NK\_CELL\_VS\_BCELL\_UP GSE45365\_NK\_CELL\_VS\_BCELL\_UP  
148 -0.30068925 -1.2456917 0.09193246  
0.15880005 1 2140 "tags=26%, list=15%, signal=30%"  
GSE7460\_CTRL\_VS\_TGFB\_TREATED\_ACT\_FOXP3\_MUT\_TCONV\_UP  
GSE7460\_CTRL\_VS\_TGFB\_TREATED\_ACT\_FOXP3\_MUT\_TCONV\_UP  
139 -0.30538046 -1.2445728 0.08429119  
0.16022137 1 1527 "tags=17%, list=11%, signal=19%"  
GSE13229\_MATURE\_VS\_INTMATURE\_NKCELL\_UP  
GSE13229\_MATURE\_VS\_INTMATURE\_NKCELL\_UP  
124 -0.30694413 -1.2442236 0.09001957  
0.1605785 1 2471 "tags=21%, list=18%, signal=25%"  
GSE42021\_TREG\_PLN\_VS\_TREG\_PRECURSORS\_THYMUS\_DN  
GSE42021\_TREG\_PLN\_VS\_TREG\_PRECURSORS\_THYMUS\_DN  
137 -0.3022377 -1.2439574 0.084870845  
0.16078626 1 1841 "tags=23%, list=13%, signal=26%"  
GSE25088\_WT\_VS\_STAT6\_KO\_MACROPHAGE\_ROSIGLITAZONE\_STIM\_DN  
GSE25088\_WT\_VS\_STAT6\_KO\_MACROPHAGE\_ROSIGLITAZONE\_STIM\_DN  
134 -0.30631045 -1.2437898 0.09126984  
0.16086242 1 1480 "tags=17%, list=10%, signal=19%"  
GSE12001\_MIR223\_KO\_VS\_WT\_NEUTROPHIL\_DN  
GSE12001\_MIR223\_KO\_VS\_WT\_NEUTROPHIL\_DN  
138 -0.30337164 -1.2421998 0.088176355  
0.16292772 1 1954 "tags=24%, list=14%, signal=27%"  
GSE5542\_IFNA\_VS\_IFNA\_AND\_IFNG\_TREATED\_EPITHELIAL\_CELLS\_24H\_UP  
GSE5542\_IFNA\_VS\_IFNA\_AND\_IFNG\_TREATED\_EPITHELIAL\_CELLS\_24H\_UP  
135 -0.30587474 -1.2417873 0.09423077  
0.1633871 2901 "tags=29%, list=21%, signal=36%"  
GSE40274\_SATB1\_VS\_FOXP3\_AND\_SATB1\_TRANSDUCE\_ACTIVATED\_CD4\_TCELL\_DN  
GSE40274\_SATB1\_VS\_FOXP3\_AND\_SATB1\_TRANSDUCE\_ACTIVATED\_CD4\_TCELL\_DN  
86 -0.32188147 -1.2413825 0.115530305  
0.16385604 1 2885 "tags=31%, list=20%, signal=39%"  
GSE27241\_WT\_CTRL\_VS\_DIGOXIN\_TREATED\_RORGT\_KO\_CD4\_TCELL\_IN\_TH17\_POLAR  
IZING\_CONDITIONS\_DN  
GSE27241\_WT\_CTRL\_VS\_DIGOXIN\_TREATED\_RORGT\_KO\_CD4\_TCELL\_IN\_TH17\_POLAR  
IZING\_CONDITIONS\_DN  
132 -0.3044781 -1.2411473 0.08990826  
0.16403149 1 1855 "tags=21%, list=13%, signal=24%"  
GSE26488\_WT\_VS\_VP16\_TRANSGENIC\_HDAC7\_KO\_DOUBLE\_POSITIVE\_THYMOCYTE\_UP  
  
GSE26488\_WT\_VS\_VP16\_TRANSGENIC\_HDAC7\_KO\_DOUBLE\_POSITIVE\_THYMOCYTE\_UP  
158 -0.30097985 -1.2411416  
0.07456979 0.1638941 1 3338 "tags=32%,  
list=24%, signal=42%"  
GSE32901\_TH17\_EMRICHED\_VS\_TH17\_NEG\_CD4\_TCELL\_UP  
GSE32901\_TH17\_EMRICHED\_VS\_TH17\_NEG\_CD4\_TCELL\_UP  
94 -0.32611218 -1.240977 0.107344635  
0.1640119 1 2362 "tags=20%, list=17%, signal=24%"  
GSE22886\_TH1\_VS\_TH2\_48H\_ACT\_UP GSE22886\_TH1\_VS\_TH2\_48H\_ACT\_UP  
156 -0.2931402 -1.2408177 0.062381852  
0.16409269 1 3384 "tags=28%, list=24%, signal=36%"



GSE5542\_UNTREATED\_VS\_IFNA\_AND\_IFNG\_TREATED\_EPITHELIAL\_CELLS\_24H\_DN  
GSE5542\_UNTREATED\_VS\_IFNA\_AND\_IFNG\_TREATED\_EPITHELIAL\_CELLS\_24H\_DN  
148 -0.299834 -1.2406403 0.08023483  
0.16420412 1 2404 "tags=25%, list=17%, signal=30%"  
GSE39820\_CTRL\_VS\_TGFBETA3\_IL6\_CD4\_TCELL\_DN  
GSE39820\_CTRL\_VS\_TGFBETA3\_IL6\_CD4\_TCELL\_DN  
147 -0.29887515 -1.2398491 0.08015267  
0.16521569 1 1882 "tags=21%, list=13%, signal=24%"  
GSE5099\_UNSTIM\_VS\_MCSF\_TREATED\_MONOCYTE\_DAY3\_UP  
GSE5099\_UNSTIM\_VS\_MCSF\_TREATED\_MONOCYTE\_DAY3\_UP  
136 -0.30536214 -1.2396958 0.09315589 0.165278  
1 1719 "tags=21%, list=12%, signal=24%"  
GSE29618\_MONOCYTE\_VS\_MDC\_DAY7\_FLU\_VACCINE\_UP  
GSE29618\_MONOCYTE\_VS\_MDC\_DAY7\_FLU\_VACCINE\_UP  
156 -0.29420984 -1.2395196 0.09056604  
0.1653649 1 2084 "tags=22%, list=15%, signal=26%"  
GSE22886\_TH1\_VS\_TH2\_48H\_ACT\_DN GSE22886\_TH1\_VS\_TH2\_48H\_ACT\_DN  
142 -0.30268672 -1.2393891 0.09803922  
0.16539943 1 1299 "tags=18%, list=9%, signal=20%"  
GSE19198\_CTRL\_VS\_IL21\_TREATED\_TCELL\_6H\_DN  
GSE19198\_CTRL\_VS\_IL21\_TREATED\_TCELL\_6H\_DN  
137 -0.30182976 -1.2390233 0.082 0.16580155  
1 2091 "tags=24%, list=15%, signal=28%"  
GSE36392\_EOSINOPHIL\_VS\_NEUTROPHIL\_IL25\_TREATED\_LUNG\_UP  
GSE36392\_EOSINOPHIL\_VS\_NEUTROPHIL\_IL25\_TREATED\_LUNG\_UP  
160 -0.29764673 -1.2389052 0.08007449  
0.16582507 1 2261 "tags=26%, list=16%, signal=31%"  
GSE12198\_LOW\_IL2\_STIM\_NK\_CELL\_VS\_HIGH\_IL2\_STIM\_NK\_CELL\_UP  
GSE12198\_LOW\_IL2\_STIM\_NK\_CELL\_VS\_HIGH\_IL2\_STIM\_NK\_CELL\_UP  
143 -0.29868063 -1.2386259 0.086629 0.16609314  
1 3128 "tags=32%, list=22%, signal=41%"  
GSE30153\_LUPUS\_VS\_HEALTHY\_DONOR\_BCELL\_UP  
GSE30153\_LUPUS\_VS\_HEALTHY\_DONOR\_BCELL\_UP  
143 -0.3021259 -1.2382553 0.07622504  
0.1665074 1 832 "tags=14%, list=6%, signal=15%"  
GSE19198\_1H\_VS\_24H\_IL21\_TREATED\_TCELL\_DN  
GSE19198\_1H\_VS\_24H\_IL21\_TREATED\_TCELL\_DN  
139 -0.30339342 -1.2380362 0.08734403  
0.16667803 1 2278 "tags=22%, list=16%, signal=26%"  
GSE17721\_PAM3CSK4\_VS\_GADIQUIMOD\_2H\_BMDC\_UP  
GSE17721\_PAM3CSK4\_VS\_GADIQUIMOD\_2H\_BMDC\_UP  
167 -0.2934609 -1.2380008 0.07224335  
0.16656846 1 2032 "tags=21%, list=14%, signal=24%"  
GSE18791\_CTRL\_VS\_NEWCASTLE\_VIRUS\_DC\_18H\_DN  
GSE18791\_CTRL\_VS\_NEWCASTLE\_VIRUS\_DC\_18H\_DN  
113 -0.31135216 -1.2373996 0.10344828  
0.16725446 1 2377 "tags=27%, list=17%, signal=33%"  
GSE15330 GRANULOCYTE\_MONOCYTE\_PROGENITOR\_VS\_PRO\_BCELL\_DN  
GSE15330 GRANULOCYTE\_MONOCYTE\_PROGENITOR\_VS\_PRO\_BCELL\_DN  
152 -0.29749817 -1.2369593 0.09019608  
0.16773961 1 2059 "tags=21%, list=15%, signal=24%"  
GSE21927\_SPLEEN\_VS\_BONE\_MARROW\_MONOCYTE\_BALBC\_UP  
GSE21927\_SPLEEN\_VS\_BONE\_MARROW\_MONOCYTE\_BALBC\_UP  
129 -0.3049291 -1.2367914 0.08382066

0.1678119 1 3110 "tags=27%, list=22%, signal=34%"  
GSE25502\_WT\_VS\_KLF13\_KO\_THYMIC\_MEMORY\_LIKE\_CD8\_TCELL\_DN  
GSE25502\_WT\_VS\_KLF13\_KO\_THYMIC\_MEMORY\_LIKE\_CD8\_TCELL\_DN  
111 -0.31377748 -1.2366945 0.10153256  
0.16781063 1 5032 "tags=41%, list=36%, signal=63%"  
GSE22886\_IGM\_MEMORY\_BCELL\_VS\_BLOOD\_PLASMA\_CELL\_UP  
GSE22886\_IGM\_MEMORY\_BCELL\_VS\_BLOOD\_PLASMA\_CELL\_UP  
122 -0.30549622 -1.2366596 0.09881423  
0.16771032 1 4475 "tags=43%, list=32%, signal=63%"  
GSE9946\_MATURE\_STIMULATORY\_VS\_PROSTAGLANDINE2\_TREATED\_MATURE\_DC\_DN  
GSE9946\_MATURE\_STIMULATORY\_VS\_PROSTAGLANDINE2\_TREATED\_MATURE\_DC\_DN  
98 -0.3191417 -1.2365967 0.09497207  
0.16764636 1 5025 "tags=41%, list=36%, signal=63%"  
GSE2706\_2H\_VS\_8H\_R848\_STIM\_DC\_DN GSE2706\_2H\_VS\_8H\_R848\_STIM\_DC\_DN  
122 -0.3056386 -1.2364935 0.08969466  
0.16764112 1 781 "tags=13%, list=6%, signal=14%"  
GSE33424\_CD161\_HIGH\_VS\_INT\_CD8\_TCELL\_UP  
GSE33424\_CD161\_HIGH\_VS\_INT\_CD8\_TCELL\_UP  
155 -0.29911095 -1.2361745 0.08416834  
0.16797867 1 1759 "tags=25%, list=12%, signal=28%"  
GSE29949\_CD8\_POS\_DC\_SPLEEN\_VS\_MONOCYTE\_BONE\_MARROW\_UP  
GSE29949\_CD8\_POS\_DC\_SPLEEN\_VS\_MONOCYTE\_BONE\_MARROW\_UP  
150 -0.29529753 -1.2356497 0.08608059  
0.16854541 1 938 "tags=11%, list=7%, signal=12%"  
GSE9988\_LPS\_VS\_LPS\_AND\_ANTI\_TREM1\_MONOCYTE\_DN  
GSE9988\_LPS\_VS\_LPS\_AND\_ANTI\_TREM1\_MONOCYTE\_DN  
132 -0.30418432 -1.2352034 0.08365019  
0.16907081 1 1367 "tags=19%, list=10%, signal=21%"  
GSE17974\_IL4\_AND\_ANTI\_IL12\_VS\_UNTREATED\_2H\_ACT\_CD4\_TCELL\_DN  
GSE17974\_IL4\_AND\_ANTI\_IL12\_VS\_UNTREATED\_2H\_ACT\_CD4\_TCELL\_DN  
114 -0.30964804 -1.2351508 0.108411215  
0.16899608 1 2807 "tags=27%, list=20%, signal=34%"  
GSE15659\_TREG\_VS\_TCONV\_DN GSE15659\_TREG\_VS\_TCONV\_DN  
112 -0.31130934 -1.2349855 0.10344828  
0.16906562 1 2641 "tags=26%, list=19%, signal=32%"  
GSE17974\_IL4\_AND\_ANTI\_IL12\_VS\_UNTREATED\_12H\_ACT\_CD4\_TCELL\_UP  
GSE17974\_IL4\_AND\_ANTI\_IL12\_VS\_UNTREATED\_12H\_ACT\_CD4\_TCELL\_UP  
125 -0.3053889 -1.2345158 0.087037034  
0.16962047 1 2087 "tags=22%, list=15%, signal=26%"  
GSE41867\_NAIVE\_VS\_DAY8\_LCMV\_ARMSTRONG\_EFFECTOR\_CD8\_TCELL\_DN  
GSE41867\_NAIVE\_VS\_DAY8\_LCMV\_ARMSTRONG\_EFFECTOR\_CD8\_TCELL\_DN  
147 -0.30000383 -1.23431 0.09039548 0.16976677  
1 2876 "tags=30%, list=20%, signal=37%"  
GSE26343\_WT\_VS\_NFAT5\_KO\_MACROPHAGE\_DN  
GSE26343\_WT\_VS\_NFAT5\_KO\_MACROPHAGE\_DN  
156 -0.29494694 -1.2340273 0.077067666  
0.17003508 1 2501 "tags=31%, list=18%, signal=38%"  
GSE2770\_TGFB\_AND\_IL4\_VS\_TGFB\_AND\_IL12\_TREATED\_ACT\_CD4\_TCELL\_6H\_DN  
GSE2770\_TGFB\_AND\_IL4\_VS\_TGFB\_AND\_IL12\_TREATED\_ACT\_CD4\_TCELL\_6H\_DN  
141 -0.2992035 -1.2334027 0.08576998  
0.17083445 1 1278 "tags=16%, list=9%, signal=18%"  
GSE17721\_0.5H\_VS\_4H\_CPG\_BMDC\_DN GSE17721\_0.5H\_VS\_4H\_CPG\_BMDC\_DN  
159 -0.29467228 -1.233093 0.08527132  
0.17110543 1 1467 "tags=18%, list=10%, signal=19%"

GSE7852\_LN\_VS\_FAT\_TREG\_DN GSE7852\_LN\_VS\_FAT\_TREG\_DN  
155 -0.29762566 -1.2329758 0.07089552  
0.1711408 1 2496 "tags=27%, list=18%, signal=33%"  
GSE17721\_LPS\_VS\_GARDIQUIMOD\_24H\_BMDC\_UP  
GSE17721\_LPS\_VS\_GARDIQUIMOD\_24H\_BMDC\_UP  
149 -0.29767317 -1.2322341 0.08285164  
0.17208706 1 1829 "tags=20%, list=13%, signal=23%"  
GSE11057\_CD4\_CENT\_MEM\_VS\_PBMC\_UP GSE11057\_CD4\_CENT\_MEM\_VS\_PBMC\_UP  
136 -0.30295482 -1.232059 0.10326087  
0.1722052 1 1250 "tags=18%, list=9%, signal=19%"  
GSE27786\_CD4\_TCELL\_VS\_NKCELL\_UP GSE27786\_CD4\_TCELL\_VS\_NKCELL\_UP  
123 -0.3101608 -1.2319362 0.11389961  
0.17222755 1 1803 "tags=24%, list=13%, signal=27%"  
GSE21360\_NAIVE\_VS\_QUATERNARY\_MEMORY\_CD8\_TCELL\_UP  
GSE21360\_NAIVE\_VS\_QUATERNARY\_MEMORY\_CD8\_TCELL\_UP  
148 -0.2962889 -1.231856 0.074 0.17220274  
1 2278 "tags=25%, list=16%, signal=29%"  
GSE45881\_CXCR6HI\_VS\_CXCR1LO\_COLONIC\_LAMINA\_PROPRIA\_UP  
GSE45881\_CXCR6HI\_VS\_CXCR1LO\_COLONIC\_LAMINA\_PROPRIA\_UP  
122 -0.30624062 -1.2317897 0.096834265  
0.17215274 1 2946 "tags=30%, list=21%, signal=37%"  
GSE10325\_CD4\_TCELL\_VS\_MYELOID\_UP GSE10325\_CD4\_TCELL\_VS\_MYELOID\_UP  
152 -0.29603916 -1.2315809 0.09055118  
0.17231351 1 1837 "tags=21%, list=13%, signal=24%"  
GSE21678\_WT\_VS\_FOXO1\_FOXO3\_KO\_TREG\_DN  
GSE21678\_WT\_VS\_FOXO1\_FOXO3\_KO\_TREG\_DN  
112 -0.3100942 -1.2312095 0.09869646  
0.17271239 1 2030 "tags=26%, list=14%, signal=30%"  
GSE18791\_CTRL\_VS\_NEWCASTLE\_VIRUS\_DC\_1H\_UP  
GSE18791\_CTRL\_VS\_NEWCASTLE\_VIRUS\_DC\_1H\_UP  
103 -0.3124181 -1.2303623 0.10536044  
0.17384893 1 5424 "tags=49%, list=38%, signal=78%"  
GSE37533\_PPARG1\_FOXP3\_VS\_FOXP3\_TRANSDUCECD\_CD4\_TCELL\_DN  
GSE37533\_PPARG1\_FOXP3\_VS\_FOXP3\_TRANSDUCECD\_CD4\_TCELL\_DN  
137 -0.2981355 -1.2303131 0.09210526  
0.17375779 1 1817 "tags=23%, list=13%, signal=27%"  
GSE32423\_CTRL\_VS\_IL4\_MEMORY\_CD8\_TCELL\_UP  
GSE32423\_CTRL\_VS\_IL4\_MEMORY\_CD8\_TCELL\_UP  
139 -0.30208826 -1.2301512 0.09775967  
0.17383792 1 2022 "tags=23%, list=14%, signal=27%"  
GSE43955\_1H\_VS\_20H\_ACT\_CD4\_TCELL\_WITH\_TGFB\_IL6\_DN  
GSE43955\_1H\_VS\_20H\_ACT\_CD4\_TCELL\_WITH\_TGFB\_IL6\_DN  
169 -0.2920538 -1.2299428 0.07879925  
0.17398995 1 3136 "tags=31%, list=22%, signal=40%"  
GSE2706\_UNSTIM\_VS\_8H\_LPS\_DC\_DN GSE2706\_UNSTIM\_VS\_8H\_LPS\_DC\_DN  
131 -0.30071437 -1.22907 0.096339114  
0.17516649 1 2081 "tags=24%, list=15%, signal=27%"  
GSE27291\_6H\_VS\_7D\_STIM\_GAMMADELTA\_TCELL\_DN  
GSE27291\_6H\_VS\_7D\_STIM\_GAMMADELTA\_TCELL\_DN  
114 -0.30672193 -1.2289894 0.1003937  
0.1751328 1 2933 "tags=30%, list=21%, signal=37%"  
GSE21360\_TERTIARY\_VS\_QUATERNARY\_MEMORY\_CD8\_TCELL\_DN  
GSE21360\_TERTIARY\_VS\_QUATERNARY\_MEMORY\_CD8\_TCELL\_DN  
147 -0.29761064 -1.2286974 0.106589146

0.17540501 1 2433 "tags=27%, list=17%, signal=32%"  
GSE17721\_LPS\_VS\_CPG\_4H\_BMDC\_UP GSE17721\_LPS\_VS\_CPG\_4H\_BMDC\_UP  
157 -0.29289433 -1.2281048 0.08102767  
0.17613779 1 2038 "tags=24%, list=14%, signal=27%"  
GSE32901\_TH1\_VS\_TH17\_ENRICHED\_CD4\_TCELL\_UP  
GSE32901\_TH1\_VS\_TH17\_ENRICHED\_CD4\_TCELL\_UP  
137 -0.30053493 -1.2276468 0.08856089  
0.1766536 1 2097 "tags=25%, list=15%, signal=29%"  
GSE40274\_CTRL\_VS\_GATA1\_TRANSDUCED\_ACTIVATED\_CD4\_TCELL\_UP  
GSE40274\_CTRL\_VS\_GATA1\_TRANSDUCED\_ACTIVATED\_CD4\_TCELL\_UP  
106 -0.30977634 -1.2273424 0.12922466  
0.17697795 1 1357 "tags=17%, list=10%, signal=19%"  
GSE43956\_WT\_VS\_SGK1\_KO\_TH17\_DIFFERENTIATED\_CD4\_TCELL\_DN  
GSE43956\_WT\_VS\_SGK1\_KO\_TH17\_DIFFERENTIATED\_CD4\_TCELL\_DN  
151 -0.2954825 -1.227149 0.09158879  
0.17710726 1 1328 "tags=17%, list=9%, signal=18%"  
GSE21546\_WT\_VS\_SAP1A\_KO\_DP\_THYMOCYTES\_UP  
GSE21546\_WT\_VS\_SAP1A\_KO\_DP\_THYMOCYTES\_UP  
124 -0.30496922 -1.2271148 0.119544595  
0.17700896 1 1775 "tags=22%, list=13%, signal=25%"  
GSE41978\_ID2\_KO\_AND\_BIM\_KO\_VS\_BIM\_KO\_KLRG1\_LOW\_EFFECTOR\_CD8\_TCELL\_DN  
  
GSE41978\_ID2\_KO\_AND\_BIM\_KO\_VS\_BIM\_KO\_KLRG1\_LOW\_EFFECTOR\_CD8\_TCELL\_DN  
142 -0.3010641 -1.2268234  
0.087272726 0.17730781 1 2507 "tags=27%,  
list=18%, signal=33%"  
GSE22886\_DC\_VS\_MONOCYTE\_DN GSE22886\_DC\_VS\_MONOCYTE\_DN  
133 -0.30208862 -1.226051 0.11088296  
0.1782823 1 2536 "tags=28%, list=18%, signal=34%"  
GSE19401\_UNSTIM\_VS\_RETINOIC\_ACID\_AND\_PAM2CSK4\_STIM\_FOLLICULAR\_DC\_DN  
GSE19401\_UNSTIM\_VS\_RETINOIC\_ACID\_AND\_PAM2CSK4\_STIM\_FOLLICULAR\_DC\_DN  
165 -0.29128382 -1.2257432 0.085192695  
0.17858887 1 1428 "tags=17%, list=10%, signal=19%"  
GSE19888\_CTRL\_VS\_TCELL\_MEMBRANES\_ACT\_MAST\_CELL\_PRETREAT\_A3R\_INH\_DN  
GSE19888\_CTRL\_VS\_TCELL\_MEMBRANES\_ACT\_MAST\_CELL\_PRETREAT\_A3R\_INH\_DN  
143 -0.30023965 -1.2256824 0.0961183  
0.17852762 1 1770 "tags=22%, list=13%, signal=25%"  
GSE20366\_TREG\_VS\_NAIVE\_CD4\_TCELL\_UP  
GSE20366\_TREG\_VS\_NAIVE\_CD4\_TCELL\_UP  
141 -0.29931247 -1.2255603 0.10721248  
0.17856862 1 2085 "tags=28%, list=15%, signal=32%"  
GSE3203\_UNTREATED\_VS\_IFNB\_TREATED\_LN\_BCELL\_DN  
GSE3203\_UNTREATED\_VS\_IFNB\_TREATED\_LN\_BCELL\_DN  
132 -0.29988226 -1.225453 0.09193246  
0.17856617 1 2297 "tags=23%, list=16%, signal=28%"  
GSE27786\_BCELL\_VS\_NKCELL\_DN GSE27786\_BCELL\_VS\_NKCELL\_DN  
154 -0.29507127 -1.2250487 0.09195402  
0.17905198 1 1259 "tags=18%, list=9%, signal=19%"  
GSE13485\_CTRL\_VS\_DAY3\_YF17D\_VACCINE\_PBMC\_DN  
GSE13485\_CTRL\_VS\_DAY3\_YF17D\_VACCINE\_PBMC\_DN  
129 -0.29995486 -1.2246616 0.10444874  
0.17946462 1 1766 "tags=24%, list=13%, signal=27%"  
GSE40225\_WT\_VS\_RIP\_B7X\_DIABETIC\_MOUSE\_PANCREATIC\_CD8\_TCELL\_UP  
GSE40225\_WT\_VS\_RIP\_B7X\_DIABETIC\_MOUSE\_PANCREATIC\_CD8\_TCELL\_UP

|                                                                           |     |             |      |             |             |                                  |
|---------------------------------------------------------------------------|-----|-------------|------|-------------|-------------|----------------------------------|
| 0.17950669                                                                | 119 | -0.30640516 | 1612 | -1.2245208  | 0.108778626 | "tags=19%, list=11%, signal=22%" |
| GSE21033_CTRL_VS_POLYIC_STIM_DC_6H_DN                                     |     |             |      |             |             |                                  |
| GSE21033_CTRL_VS_POLYIC_STIM_DC_6H_DN                                     |     |             |      |             |             |                                  |
| 0.17940423                                                                | 107 | -0.30990204 | 1510 | -1.2244854  | 0.11324376  | "tags=16%, list=11%, signal=18%" |
| GSE12198_NK_VS_NK_ACT_EXPANSION_SYSTEM_DERIVED_NK_CELL_UP                 |     |             |      |             |             |                                  |
| GSE12198_NK_VS_NK_ACT_EXPANSION_SYSTEM_DERIVED_NK_CELL_UP                 |     |             |      |             |             |                                  |
| 0.17929779                                                                | 146 | -0.29803926 | 1712 | -1.2244545  | 0.10037175  | "tags=21%, list=12%, signal=23%" |
| GSE29949_MICROGLIA_BRAIN_VS_CD8_NEG_DC_SPLEEN_UP                          |     |             |      |             |             |                                  |
| GSE29949_MICROGLIA_BRAIN_VS_CD8_NEG_DC_SPLEEN_UP                          |     |             |      |             |             |                                  |
| 0.17932141                                                                | 147 | -0.295315   | 1391 | -1.2243435  | 0.09090909  | "tags=16%, list=10%, signal=17%" |
| GSE3982_NKCELL_VS_TH2_UP                                                  |     |             |      |             |             |                                  |
| GSE3982_NKCELL_VS_TH2_UP                                                  |     |             |      |             |             |                                  |
| 0.17921585                                                                | 141 | -0.29804215 | 4898 | -1.2243183  | 0.09586466  | "tags=47%, list=35%, signal=71%" |
| GSE21546_SAP1A_KO_VS_SAP1A_KO_AND_ELK1_KO_ANTI_CD3_STIM_DP_THYMOCYTE_S_DN |     |             |      |             |             |                                  |
| GSE21546_SAP1A_KO_VS_SAP1A_KO_AND_ELK1_KO_ANTI_CD3_STIM_DP_THYMOCYTE_S_DN |     |             |      |             |             |                                  |
| 0.09861933                                                                | 157 | 0.18005006  | 1    | -0.2941895  | -1.2236695  | "tags=27%, list=16%, signal=32%" |
| GSE5589_LPS_VS_LPS_AND_IL10_STIM_IL6_KO_MACROPHAGE_45MIN_UP               |     |             |      |             |             |                                  |
| GSE5589_LPS_VS_LPS_AND_IL10_STIM_IL6_KO_MACROPHAGE_45MIN_UP               |     |             |      |             |             |                                  |
| 0.18016763                                                                | 139 | -0.29805937 | 2087 | -1.2234976  | 0.0952381   | "tags=22%, list=15%, signal=26%" |
| GSE17721_LPS_VS_CPG_1H_BMDC_DN                                            |     |             |      |             |             |                                  |
| GSE17721_LPS_VS_CPG_1H_BMDC_DN                                            |     |             |      |             |             |                                  |
| 0.18051933                                                                | 167 | -0.2917161  | 1800 | -1.2231857  | 0.08366534  | "tags=21%, list=13%, signal=24%" |
| GSE22282_HYPOXIA_VS_NORMOXIA_MYELOID_DC_DN                                |     |             |      |             |             |                                  |
| GSE22282_HYPOXIA_VS_NORMOXIA_MYELOID_DC_DN                                |     |             |      |             |             |                                  |
| 0.18267424                                                                | 134 | -0.2965684  | 1309 | -1.2216551  | 0.10700389  | "tags=15%, list=9%, signal=16%"  |
| GSE25123_ROSIGLITAZONE_VS_IL4_AND_ROSIGLITAZONE_STIM_MACROPHAGE_DAY1_0_DN |     |             |      |             |             |                                  |
| GSE25123_ROSIGLITAZONE_VS_IL4_AND_ROSIGLITAZONE_STIM_MACROPHAGE_DAY1_0_DN |     |             |      |             |             |                                  |
| 0.14392523                                                                | 86  | 0.18320648  | 1    | -0.32178506 | -1.221208   | "tags=30%, list=21%, signal=38%" |
| GSE21360_NAIVE_VS_QUATERNARY_MEMORY_CD8_TCELL_DN                          |     |             |      |             |             |                                  |
| GSE21360_NAIVE_VS_QUATERNARY_MEMORY_CD8_TCELL_DN                          |     |             |      |             |             |                                  |
| 0.18353215                                                                | 145 | -0.29445603 | 1912 | -1.2208871  | 0.08704062  | "tags=23%, list=14%, signal=27%" |
| GSE42021_TREG_PLN_VS_CD24INT_TREG_THYMUS_DN                               |     |             |      |             |             |                                  |
| GSE42021_TREG_PLN_VS_CD24INT_TREG_THYMUS_DN                               |     |             |      |             |             |                                  |
| 0.18337624                                                                | 134 | -0.29847062 | 1108 | -1.2208867  | 0.10694184  | "tags=18%, list=8%, signal=19%"  |
| GSE22886_NAIVE_BCELL_VS_BM_PLASMA_CELL_DN                                 |     |             |      |             |             |                                  |
| GSE22886_NAIVE_BCELL_VS_BM_PLASMA_CELL_DN                                 |     |             |      |             |             |                                  |
| 1                                                                         | 153 | -0.29051885 | 1038 | -1.2208141  | 0.10625     | "tags=17%, list=7%, signal=18%"  |
| GSE16385_ROSIGLITAZONE_IL4_VS_IFNG_TNF_STIM_MACROPHAGE_DN                 |     |             |      |             |             |                                  |
| GSE16385_ROSIGLITAZONE_IL4_VS_IFNG_TNF_STIM_MACROPHAGE_DN                 |     |             |      |             |             |                                  |

143 -0.29628575 -1.2202307 0.096525095  
0.18409523 1 5750 "tags=55%, list=41%, signal=92%"  
GSE339\_EX\_VIVO\_VS\_IN\_CULTURE\_CD4POS\_DC\_DN  
GSE339\_EX\_VIVO\_VS\_IN\_CULTURE\_CD4POS\_DC\_DN  
149 -0.29183766 -1.2190973 0.09784736  
0.18571015 1 2241 "tags=24%, list=16%, signal=28%"  
GSE16451\_CTRL\_VS\_WEST\_EQUINE\_ENC\_VIRUS\_IMMATURE\_NEURON\_CELL\_LINE\_UP  
GSE16451\_CTRL\_VS\_WEST\_EQUINE\_ENC\_VIRUS\_IMMATURE\_NEURON\_CELL\_LINE\_UP  
154 -0.29178905 -1.2188597 0.08039216  
0.18593152 1 2283 "tags=24%, list=16%, signal=28%"  
GSE23321\_CD8\_STEM\_CELL\_MEMORY\_VS\_CENTRAL\_MEMORY\_CD8\_TCELL\_UP  
GSE23321\_CD8\_STEM\_CELL\_MEMORY\_VS\_CENTRAL\_MEMORY\_CD8\_TCELL\_UP  
145 -0.2971457 -1.2186779 0.09416196  
0.18605585 1 3964 "tags=34%, list=28%, signal=47%"  
GSE22886\_CTRL\_VS\_LPS\_24H\_DC\_DN GSE22886\_CTRL\_VS\_LPS\_24H\_DC\_DN  
141 -0.29661605 -1.2184187 0.11111111  
0.1862725 1 1158 "tags=21%, list=8%, signal=22%"  
GSE22886\_DAY0\_VS\_DAY7\_MONOCYTE\_IN\_CULTURE\_UP  
GSE22886\_DAY0\_VS\_DAY7\_MONOCYTE\_IN\_CULTURE\_UP  
135 -0.3031358 -1.2183642 0.10377359  
0.1862146 1 2501 "tags=31%, list=18%, signal=37%"  
GSE28726\_ACT\_CD4\_TCELL\_VS\_ACT\_NKTCELL\_DN  
GSE28726\_ACT\_CD4\_TCELL\_VS\_ACT\_NKTCELL\_DN  
142 -0.2958838 -1.2183388 0.09293681  
0.18610546 1 2457 "tags=26%, list=17%, signal=31%"  
GSE6269\_HEALTHY\_VS\_E\_COLI\_INF\_PBMC\_UP  
GSE6269\_HEALTHY\_VS\_E\_COLI\_INF\_PBMC\_UP  
110 -0.30920735 -1.2182595 0.10748561  
0.18606132 1 2685 "tags=27%, list=19%, signal=33%"  
GSE43863\_NAIVE\_VS\_TH1\_EFF\_CD4\_TCELL\_D6\_LCMV\_DN  
GSE43863\_NAIVE\_VS\_TH1\_EFF\_CD4\_TCELL\_D6\_LCMV\_DN  
98 -0.31768626 -1.2180753 0.12523021  
0.18619914 1 2457 "tags=22%, list=17%, signal=27%"  
GSE1740\_MCSF\_VS\_MCSF\_AND\_IFNG\_DAY2\_DERIVED\_MACROPHAGE\_DN  
GSE1740\_MCSF\_VS\_MCSF\_AND\_IFNG\_DAY2\_DERIVED\_MACROPHAGE\_DN  
124 -0.3022222 -1.2179756 0.12915128  
0.1861904 1 2339 "tags=26%, list=17%, signal=31%"  
GSE17580\_TREG\_VS\_TEFF\_S\_MANSONI\_INF\_DN  
GSE17580\_TREG\_VS\_TEFF\_S\_MANSONI\_INF\_DN  
151 -0.295851 -1.217721 0.08364312  
0.18644662 1 2237 "tags=26%, list=16%, signal=31%"  
GSE22025\_TGFB1\_VS\_TGFB1\_AND\_PROGESTERONE\_TREATED\_CD4\_TCELL\_UP  
GSE22025\_TGFB1\_VS\_TGFB1\_AND\_PROGESTERONE\_TREATED\_CD4\_TCELL\_UP  
147 -0.29354265 -1.2176249 0.08514493  
0.1864482 1 1055 "tags=14%, list=7%, signal=15%"  
GSE2405\_0H\_VS\_3H\_A\_PHAGOCYTOPHILUM\_STIM\_NEUTROPHIL\_UP  
GSE2405\_0H\_VS\_3H\_A\_PHAGOCYTOPHILUM\_STIM\_NEUTROPHIL\_UP  
161 -0.29255617 -1.2175921 0.07954545  
0.18635195 1 3910 "tags=35%, list=28%, signal=48%"  
GSE17721\_CTRL\_VS\_PAM3CSK4\_8H\_BMDC\_DN  
GSE17721\_CTRL\_VS\_PAM3CSK4\_8H\_BMDC\_DN  
160 -0.28921852 -1.2174057 0.10547667  
0.18648967 1 2081 "tags=24%, list=15%, signal=28%"  
GSE14908\_RESTING\_VS\_HDM\_STIM\_CD4\_TCELL\_NONATOPIC\_PATIENT\_UP

GSE14908\_RESTING\_VS\_HDM\_STIM\_CD4\_TCELL\_NONATOPIC\_PATIENT\_UP  
138 -0.29651758 -1.2167991 0.10707804  
0.18728542 1 2182 "tags=24%, list=15%, signal=28%"  
GSE22886\_DAY0\_VS\_DAY1\_MONOCYTE\_IN\_CULTURE\_DN  
GSE22886\_DAY0\_VS\_DAY1\_MONOCYTE\_IN\_CULTURE\_DN  
161 -0.28619716 -1.2165294 0.10018553  
0.18754542 1 1712 "tags=20%, list=12%, signal=23%"  
GSE21546\_UNSTIM\_VS\_ANTI\_CD3\_STIM\_SAP1A\_KO\_AND\_ELK1\_KO\_DP\_THYMOCYTES\_UP  
GSE21546\_UNSTIM\_VS\_ANTI\_CD3\_STIM\_SAP1A\_KO\_AND\_ELK1\_KO\_DP\_THYMOCYTES\_UP  
106 -0.3066124 -1.2161599  
0.12859885 0.18795972 1 2097 "tags=24%,  
list=15%, signal=27%"  
GSE17721\_0.5H\_VS\_4H\_GARDIQUIMOD\_BMDC\_UP  
GSE17721\_0.5H\_VS\_4H\_GARDIQUIMOD\_BMDC\_UP  
143 -0.29470196 -1.2157917 0.104166664  
0.18838009 1 1679 "tags=21%, list=12%, signal=24%"  
GSE40443\_INDUCED\_VS\_TOTAL\_TREG\_UP GSE40443\_INDUCED\_VS\_TOTAL\_TREG\_UP  
157 -0.28647634 -1.2153515 0.08416834  
0.18891478 1 4026 "tags=34%, list=29%, signal=48%"  
GSE46606\_UNSTIM\_VS\_CD40L\_IL2\_IL5\_3DAY\_STIMULATED\_IRF4HIGH\_SORTED\_BCELL\_DN  
GSE46606\_UNSTIM\_VS\_CD40L\_IL2\_IL5\_3DAY\_STIMULATED\_IRF4HIGH\_SORTED\_BCELL\_DN  
136 -0.29523474 -1.2149523  
0.11516315 0.18942001 1 3749 "tags=30%,  
list=27%, signal=41%"  
GSE14308\_TH1\_VS\_TH17\_DN GSE14308\_TH1\_VS\_TH17\_DN  
139 -0.29252893 -1.2145586 0.11700183  
0.18989521 1 2307 "tags=25%, list=16%, signal=30%"  
GSE37533\_PPARG2\_FOXP3\_VS\_FOXP3\_TRANSDUCECD\_CD4\_TCELL\_UP  
GSE37533\_PPARG2\_FOXP3\_VS\_FOXP3\_TRANSDUCECD\_CD4\_TCELL\_UP  
142 -0.2967353 -1.2141191 0.11153119 0.19038  
1 2232 "tags=26%, list=16%, signal=31%"  
GSE24142\_EARLY\_THYMIC\_PROGENITOR\_VS\_DN3\_THYMOCYTE\_FETAL\_DN  
GSE24142\_EARLY\_THYMIC\_PROGENITOR\_VS\_DN3\_THYMOCYTE\_FETAL\_DN  
156 -0.29495555 -1.2140986 0.09487666  
0.19025102 1 2085 "tags=24%, list=15%, signal=28%"  
GSE29617\_DAY3\_VS\_DAY7\_TIV\_FLU\_VACCINE\_PBMC\_2008\_UP  
GSE29617\_DAY3\_VS\_DAY7\_TIV\_FLU\_VACCINE\_PBMC\_2008\_UP  
124 -0.3040122 -1.2138627 0.119140625  
0.19046575 1 1105 "tags=14%, list=8%, signal=15%"  
GSE22033\_UNTREATED\_VS\_MRL24\_TREATED\_MEF\_DN  
GSE22033\_UNTREATED\_VS\_MRL24\_TREATED\_MEF\_DN  
149 -0.29148492 -1.2135253 0.08695652  
0.19082129 1 2071 "tags=19%, list=15%, signal=22%"  
GSE11864\_CSF1\_VS\_CSF1\_IFNG\_PAM3CYS\_IN\_MAC\_UP  
GSE11864\_CSF1\_VS\_CSF1\_IFNG\_PAM3CYS\_IN\_MAC\_UP  
124 -0.29975355 -1.2133338 0.105065666  
0.19096233 1 2934 "tags=27%, list=21%, signal=33%"  
GSE30971\_2H\_VS\_4H\_LPS\_STIM\_MACROPHAGE\_WBP7\_HET\_DN  
GSE30971\_2H\_VS\_4H\_LPS\_STIM\_MACROPHAGE\_WBP7\_HET\_DN  
105 -0.30346462 -1.2130183 0.106814 0.19130847  
1 2504 "tags=24%, list=18%, signal=29%"  
GSE5542\_IFNG\_VS\_IFNA\_AND\_IFNG\_TREATED\_EPITHELIAL\_CELLS\_24H\_DN

GSE5542\_IFNG\_VS\_IFNA\_AND\_IFNG\_TREATED\_EPITHELIAL\_CELLS\_24H\_DN  
154 -0.2873211 -1.2125835 0.0967118  
0.1918426 1 2974 "tags=27%, list=21%, signal=34%"  
GSE22886\_NAIVE\_CD4\_TCELL\_VS\_NEUTROPHIL\_DN  
GSE22886\_NAIVE\_CD4\_TCELL\_VS\_NEUTROPHIL\_DN  
141 -0.2934104 -1.2115326 0.11516315  
0.19337513 1 3714 "tags=34%, list=26%, signal=46%"  
GSE8921\_UNSTIM\_0H\_VS\_TLR1\_2\_STIM\_MONOCYTE\_3H\_UP  
GSE8921\_UNSTIM\_0H\_VS\_TLR1\_2\_STIM\_MONOCYTE\_3H\_UP  
135 -0.29672223 -1.2109268 0.11657559  
0.19420582 1 1803 "tags=19%, list=13%, signal=22%"  
GSE32901\_NAIVE\_VS\_TH17\_ENRICHED\_CD4\_TCELL\_UP  
GSE32901\_NAIVE\_VS\_TH17\_ENRICHED\_CD4\_TCELL\_UP  
118 -0.30126566 -1.2105725 0.11434109  
0.19460481 1 2241 "tags=25%, list=16%, signal=29%"  
GSE6259\_FLT3L\_INDUCED\_DEC205\_POS\_DC\_VS\_CD4\_TCELL\_DN  
GSE6259\_FLT3L\_INDUCED\_DEC205\_POS\_DC\_VS\_CD4\_TCELL\_DN  
91 -0.31914666 -1.2103479 0.12692308  
0.19478913 1 6367 "tags=49%, list=45%, signal=90%"  
GSE7548\_NAIVE\_VS\_DAY7\_PCC\_IMMUNIZATION\_CD4\_TCELL\_DN  
GSE7548\_NAIVE\_VS\_DAY7\_PCC\_IMMUNIZATION\_CD4\_TCELL\_DN  
141 -0.29186815 -1.2099253 0.10172745  
0.1952969 1 1117 "tags=16%, list=8%, signal=18%"  
GSE3720\_UNSTIM\_VS\_LPS\_STIM\_VD1\_GAMMADELTA\_TCELL\_DN  
GSE3720\_UNSTIM\_VS\_LPS\_STIM\_VD1\_GAMMADELTA\_TCELL\_DN  
119 -0.3036739 -1.2092245 0.10071942  
0.19625285 1 962 "tags=14%, list=7%, signal=15%"  
GSE29164\_CD8\_TCELL\_VS\_CD8\_TCELL\_AND\_IL12\_TREATED\_MELANOMA\_DAY7\_UP  
GSE29164\_CD8\_TCELL\_VS\_CD8\_TCELL\_AND\_IL12\_TREATED\_MELANOMA\_DAY7\_UP  
125 -0.30219215 -1.2090056 0.13207547  
0.19645873 1 1585 "tags=21%, list=11%, signal=23%"  
GSE2706\_R848\_VS\_R848\_AND\_LPS\_8H\_STIM\_DC\_DN  
GSE2706\_R848\_VS\_R848\_AND\_LPS\_8H\_STIM\_DC\_DN  
125 -0.2976225 -1.2082728 0.12737642  
0.19748968 1 2248 "tags=24%, list=16%, signal=28%"  
GSE22886\_CD4\_TCELL\_VS\_BCELL\_NAIVE\_DN  
GSE22886\_CD4\_TCELL\_VS\_BCELL\_NAIVE\_DN  
127 -0.29531196 -1.2074374 0.10940499  
0.19866404 1 2694 "tags=27%, list=19%, signal=33%"  
GSE42021\_TREG\_PLN\_VS\_CD24LO\_TREG\_THYMUS\_UP  
GSE42021\_TREG\_PLN\_VS\_CD24LO\_TREG\_THYMUS\_UP  
135 -0.29710674 -1.2072436 0.10881801  
0.19883226 1 2028 "tags=23%, list=14%, signal=27%"  
GSE36009\_UNSTIM\_VS\_LPS\_STIM\_DC\_UP GSE36009\_UNSTIM\_VS\_LPS\_STIM\_DC\_UP  
142 -0.29206234 -1.2072366 0.12222222  
0.19868207 1 2377 "tags=27%, list=17%, signal=32%"  
GSE43863\_NAIVE\_VS\_LY6C\_INT\_CXCR5POS\_CD4\_EFF\_TCELL\_D6\_LCMV\_DN  
GSE43863\_NAIVE\_VS\_LY6C\_INT\_CXCR5POS\_CD4\_EFF\_TCELL\_D6\_LCMV\_DN  
100 -0.31062764 -1.2061384 0.14181818  
0.2002521 1 4588 "tags=35%, list=33%, signal=51%"  
GSE2770\_UNTREATED\_VS\_TGFB\_AND\_IL12\_TREATED\_ACT\_CD4\_TCELL\_48H\_DN  
GSE2770\_UNTREATED\_VS\_TGFB\_AND\_IL12\_TREATED\_ACT\_CD4\_TCELL\_48H\_DN  
137 -0.29424205 -1.2060035 0.116504855  
0.20030767 1 1848 "tags=21%, list=13%, signal=24%"



GSE7831\_UNSTIM\_VS\_CPG\_STIM\_PDC\_1H\_DN  
GSE7831\_UNSTIM\_VS\_CPG\_STIM\_PDC\_1H\_DN  
150 -0.2907642 -1.205473 0.10646388  
0.20098877 1 1593 "tags=23%, list=11%, signal=25%"  
GSE360\_CTRL\_VS\_M\_TUBERCULOSIS\_MAC\_DN  
GSE360\_CTRL\_VS\_M\_TUBERCULOSIS\_MAC\_DN  
155 -0.2880606 -1.2051789 0.10638298  
0.20130384 1 928 "tags=13%, list=7%, signal=14%"  
GSE13493\_CD4INTCD8POS\_VS\_CD8POS\_THYMOCYTE\_DN  
GSE13493\_CD4INTCD8POS\_VS\_CD8POS\_THYMOCYTE\_DN  
133 -0.29805064 -1.2051543 0.118320614  
0.20117868 1 2375 "tags=22%, list=17%, signal=26%"  
GSE17721\_CTRL\_VS\_GARDIQUIMOD\_4H\_BMDC\_DN  
GSE17721\_CTRL\_VS\_GARDIQUIMOD\_4H\_BMDC\_DN  
153 -0.29236597 -1.2051092 0.09266409  
0.20107982 1 2956 "tags=24%, list=21%, signal=30%"  
GSE37605\_C57BL6\_VS\_NOD\_FOXP3\_IRES\_GFP\_TREG\_UP  
GSE37605\_C57BL6\_VS\_NOD\_FOXP3\_IRES\_GFP\_TREG\_UP  
84 -0.3211023 -1.2049253 0.1438849  
0.20122494 1 3754 "tags=29%, list=27%, signal=39%"  
GSE3982\_MAST\_CELL\_VS\_MAC\_UP GSE3982\_MAST\_CELL\_VS\_MAC\_UP  
129 -0.29701862 -1.2047279 0.11786372  
0.20137995 1 1521 "tags=19%, list=11%, signal=21%"  
GSE43863\_TFH\_VS\_LY6C\_INT\_CXCR5POS\_MEMORY\_CD4\_TCELL\_UP  
GSE43863\_TFH\_VS\_LY6C\_INT\_CXCR5POS\_MEMORY\_CD4\_TCELL\_UP  
140 -0.29148692 -1.204222 0.118644066  
0.20200992 1 2377 "tags=24%, list=17%, signal=28%"  
GSE5589\_UNSTIM\_VS\_180MIN\_LPS\_AND\_IL10\_STIM\_MACROPHAGE\_UP  
GSE5589\_UNSTIM\_VS\_180MIN\_LPS\_AND\_IL10\_STIM\_MACROPHAGE\_UP  
150 -0.29266357 -1.2038248 0.11111111  
0.20251457 1 2204 "tags=25%, list=16%, signal=29%"  
GSE19401\_UNSTIM\_VS\_PAM2CSK4\_STIM\_FOLLICULAR\_DC\_UP  
GSE19401\_UNSTIM\_VS\_PAM2CSK4\_STIM\_FOLLICULAR\_DC\_UP  
153 -0.2897857 -1.2028613 0.10948905  
0.20391814 1 2192 "tags=27%, list=16%, signal=31%"  
GSE27670\_CTRL\_VS\_LMP1\_TRANSDUCEDC\_GC\_BCELL\_DN  
GSE27670\_CTRL\_VS\_LMP1\_TRANSDUCEDC\_GC\_BCELL\_DN  
158 -0.2914261 -1.202747 0.11376147  
0.20395847 1 2964 "tags=23%, list=21%, signal=29%"  
GSE2770\_TGFB\_AND\_IL4\_VS\_IL4\_TREATED\_ACT\_CD4\_TCELL\_2H\_UP  
GSE2770\_TGFB\_AND\_IL4\_VS\_IL4\_TREATED\_ACT\_CD4\_TCELL\_2H\_UP  
144 -0.29132718 -1.2026865 0.10873786  
0.20388064 1 1438 "tags=14%, list=10%, signal=15%"  
GSE45365\_WT\_VS\_IFNAR\_KO\_CD11B\_DC\_MCMV\_INFECTION\_UP  
GSE45365\_WT\_VS\_IFNAR\_KO\_CD11B\_DC\_MCMV\_INFECTION\_UP  
118 -0.30333644 -1.2020396 0.13211009  
0.20483746 1 2212 "tags=25%, list=16%, signal=30%"  
GSE3982\_MAST\_CELL\_VS\_TH1\_UP GSE3982\_MAST\_CELL\_VS\_TH1\_UP  
135 -0.29224786 -1.2019689 0.10526316  
0.20478505 1 2113 "tags=21%, list=15%, signal=25%"  
GSE13306\_RA\_VS\_UNTREATED\_TCONV\_UP GSE13306\_RA\_VS\_UNTREATED\_TCONV\_UP  
143 -0.2883892 -1.2011833 0.102713175  
0.20593962 1 2553 "tags=26%, list=18%, signal=31%"  
GSE2770\_UNTREATED\_VS\_TGFB\_AND\_IL12\_TREATED\_ACT\_CD4\_TCELL\_6H\_UP

GSE2770\_UNTREATED\_VS\_TGFB\_AND\_IL12\_TREATED\_ACT\_CD4\_TCELL\_6H\_UP  
132 -0.2940863 -1.2007546 0.10980392  
0.20650128 1 1848 "tags=21%, list=13%, signal=24%"  
GSE360\_L\_DONOVANI\_VS\_B\_MALAYI\_LOW\_DOSE\_DC\_UP  
GSE360\_L\_DONOVANI\_VS\_B\_MALAYI\_LOW\_DOSE\_DC\_UP  
157 -0.28900394 -1.2006905 0.108986616  
0.2064429 1 3037 "tags=27%, list=22%, signal=34%"  
GSE4590\_PRE\_BCELL\_VS\_VPREB\_POS\_LARGE\_PRE\_BCELL\_UP  
GSE4590\_PRE\_BCELL\_VS\_VPREB\_POS\_LARGE\_PRE\_BCELL\_UP  
123 -0.29879346 -1.2006176 0.13267326  
0.20639013 1 2199 "tags=20%, list=16%, signal=24%"  
GSE27786\_CD4\_VS\_CD8\_TCELL\_UP GSE27786\_CD4\_VS\_CD8\_TCELL\_UP  
135 -0.2937344 -1.2002162 0.11376147  
0.20687449 1 1797 "tags=21%, list=13%, signal=24%"  
GSE22601\_DOUBLE\_NEGATIVE\_VS\_CD8\_SINGLE\_POSITIVE\_THYMOCYTE\_DN  
GSE22601\_DOUBLE\_NEGATIVE\_VS\_CD8\_SINGLE\_POSITIVE\_THYMOCYTE\_DN  
119 -0.29710227 -1.1999516 0.12720157  
0.20715868 1 2640 "tags=25%, list=19%, signal=31%"  
GSE14386\_UNTREATED\_VS\_IFNA\_TREATED\_ACT\_PBMC\_MS\_PATIENT\_UP  
GSE14386\_UNTREATED\_VS\_IFNA\_TREATED\_ACT\_PBMC\_MS\_PATIENT\_UP  
97 -0.30907488 -1.1998351 0.14478764  
0.20718865 1 4960 "tags=47%, list=35%, signal=73%"  
GSE5542\_UNTREATED\_VS\_IFNG\_TREATED\_EPITHELIAL\_CELLS\_24H\_DN  
GSE5542\_UNTREATED\_VS\_IFNG\_TREATED\_EPITHELIAL\_CELLS\_24H\_DN  
126 -0.29815537 -1.1994684 0.12523365  
0.20762677 1 1482 "tags=18%, list=11%, signal=20%"  
GSE39152\_CD103\_NEG\_VS\_POS\_MEMORY\_CD8\_TCELL\_UP  
GSE39152\_CD103\_NEG\_VS\_POS\_MEMORY\_CD8\_TCELL\_UP  
163 -0.282578 -1.1992532 0.11811024  
0.20779845 1 1575 "tags=17%, list=11%, signal=19%"  
GSE10240\_IL22\_VS\_IL22\_AND\_IL17\_STIM\_PRIMARY\_BRONCHIAL\_EPITHELIAL\_CELLS\_DN  
GSE10240\_IL22\_VS\_IL22\_AND\_IL17\_STIM\_PRIMARY\_BRONCHIAL\_EPITHELIAL\_CELLS\_DN  
144 -0.29277813 -1.1990736  
0.12138728 0.20793292 1 1885 "tags=20%, list=13%, signal=23%"  
GSE22935\_WT\_VS\_MYD88\_KO\_MACROPHAGE\_DN  
GSE22935\_WT\_VS\_MYD88\_KO\_MACROPHAGE\_DN  
145 -0.2914068 -1.1988407 0.112840466  
0.20813128 1 3460 "tags=28%, list=25%, signal=36%"  
GSE17721\_CTRL\_VS\_PAM3CSK4\_2H\_BMDC\_DN  
GSE17721\_CTRL\_VS\_PAM3CSK4\_2H\_BMDC\_DN  
171 -0.28504708 -1.1987381 0.115384616  
0.20812637 1 3187 "tags=30%, list=23%, signal=38%"  
GSE27786\_NKTCELL\_VS\_ERYTHROBLAST\_UP  
GSE27786\_NKTCELL\_VS\_ERYTHROBLAST\_UP  
152 -0.28783745 -1.1985583 0.10357816  
0.20826328 1 1407 "tags=20%, list=10%, signal=22%"  
GSE10325\_LUPUS\_CD4\_TCELL\_VS\_LUPUS\_BCELL\_DN  
GSE10325\_LUPUS\_CD4\_TCELL\_VS\_LUPUS\_BCELL\_DN  
125 -0.29558918 -1.1984807 0.12859885  
0.20823026 1 2325 "tags=25%, list=16%, signal=29%"  
GSE24142\_ADULT\_VS\_FETAL\_DN3\_THYMOCYTE\_DN  
GSE24142\_ADULT\_VS\_FETAL\_DN3\_THYMOCYTE\_DN

156 -0.28789052 -1.1984469 0.120229006  
0.20812237 1 1946 "tags=19%, list=14%, signal=22%"  
GSE16450\_CTRL\_VS\_IFNA\_12H\_STIM\_IMMATURE\_NEURON\_CELL\_LINE\_UP  
GSE16450\_CTRL\_VS\_IFNA\_12H\_STIM\_IMMATURE\_NEURON\_CELL\_LINE\_UP  
129 -0.2936375 -1.1975152 0.13060428  
0.20950781 1 2317 "tags=27%, list=16%, signal=32%"  
GSE24634\_NAIVE\_CD4\_TCELL\_VS\_DAY3\_IL4\_CONV\_TREG\_UP  
GSE24634\_NAIVE\_CD4\_TCELL\_VS\_DAY3\_IL4\_CONV\_TREG\_UP  
138 -0.29166982 -1.1971396 0.10176125  
0.21000852 1 3948 "tags=33%, list=28%, signal=46%"  
GSE24081\_CONTROLLER\_VS\_PROGRESSOR\_HIV\_SPECIFIC\_CD8\_TCELL\_UP  
GSE24081\_CONTROLLER\_VS\_PROGRESSOR\_HIV\_SPECIFIC\_CD8\_TCELL\_UP  
134 -0.29010418 -1.1968573 0.121212125  
0.21031821 1 1523 "tags=19%, list=11%, signal=22%"  
GSE360\_DC\_VS\_MAC\_M\_TUBERCULOSIS\_UP  
GSE360\_DC\_VS\_MAC\_M\_TUBERCULOSIS\_UP  
136 -0.2926198 -1.1967844 0.124282986  
0.21025886 1 1817 "tags=21%, list=13%, signal=24%"  
GSE17974\_2.5H\_VS\_72H\_IL4\_AND\_ANTI\_IL12\_ACT\_CD4\_TCELL\_UP  
GSE17974\_2.5H\_VS\_72H\_IL4\_AND\_ANTI\_IL12\_ACT\_CD4\_TCELL\_UP  
132 -0.29689285 -1.1964945 0.13358779  
0.2105949 1 1979 "tags=25%, list=14%, signal=29%"  
GSE10325\_BCELL\_VS\_MYELOID\_UP GSE10325\_BCELL\_VS\_MYELOID\_UP  
128 -0.29245284 -1.1964788 0.12734865  
0.21045516 1 1145 "tags=16%, list=8%, signal=17%"  
GSE18281\_SUBCAPSULAR\_VS\_PERIMEDULLARY\_CORTICAL\_REGION\_OF\_THYMUS\_UP  
GSE18281\_SUBCAPSULAR\_VS\_PERIMEDULLARY\_CORTICAL\_REGION\_OF\_THYMUS\_UP  
155 -0.28377458 -1.1962042 0.116071425  
0.21075991 1 1295 "tags=17%, list=9%, signal=18%"  
GSE16450\_CTRL\_VS\_IFNA\_6H\_STIM\_IMMATURE\_NEURON\_CELL\_LINE\_UP  
GSE16450\_CTRL\_VS\_IFNA\_6H\_STIM\_IMMATURE\_NEURON\_CELL\_LINE\_UP  
142 -0.29305542 -1.1956543 0.12475248  
0.21157178 1 2405 "tags=23%, list=17%, signal=28%"  
GSE32255\_UNSTIM\_VS\_4H\_LPS\_STIM\_DC\_UP  
GSE32255\_UNSTIM\_VS\_4H\_LPS\_STIM\_DC\_UP  
150 -0.28802782 -1.1950558 0.11619048  
0.21241905 1 1979 "tags=28%, list=14%, signal=32%"  
GSE11924\_TH1\_VS\_TH17\_CD4\_TCELL\_DN GSE11924\_TH1\_VS\_TH17\_CD4\_TCELL\_DN  
147 -0.29009482 -1.1949751 0.10789981  
0.2123886 1 1865 "tags=25%, list=13%, signal=29%"  
GSE30971\_CTRL\_VS\_LPS\_STIM\_MACROPHAGE\_WBP7\_HET\_4H\_UP  
GSE30971\_CTRL\_VS\_LPS\_STIM\_MACROPHAGE\_WBP7\_HET\_4H\_UP  
157 -0.28591 -1.1945177 0.11382114 0.21300901  
1 1091 "tags=16%, list=8%, signal=17%"  
GSE12484\_HEALTHY\_VS\_PERIDONTITIS\_NEUTROPHILS\_UP  
GSE12484\_HEALTHY\_VS\_PERIDONTITIS\_NEUTROPHILS\_UP  
108 -0.30023012 -1.1941648 0.12614259  
0.21343102 1 5470 "tags=50%, list=39%, signal=81%"  
GSE37534\_PIOGLITAZONE\_VS\_ROSIGLITAZONE\_TREATED\_CD4\_TCELL\_PPARG1\_FOXP  
3\_TRANSDUCE\_DN  
GSE37534\_PIOGLITAZONE\_VS\_ROSIGLITAZONE\_TREATED\_CD4\_TCELL\_PPARG1\_FOXP  
3\_TRANSDUCE\_DN 129 -0.29469755 -1.193925  
0.1254902 0.21369094 1 3228 "tags=28%,  
list=23%, signal=36%"

GSE16385\_ROSIGLITAZONE\_IL4\_VS\_ROSIGLITAZONE\_ALONE\_STIM\_MACROPHAGE\_UP

GSE16385\_ROSIGLITAZONE\_IL4\_VS\_ROSIGLITAZONE\_ALONE\_STIM\_MACROPHAGE\_UP  
140 -0.2915581 -1.1934503 0.125  
0.21431366 1 2085 "tags=18%, list=15%, signal=21%"  
GSE22611\_UNSTIM\_VS\_6H\_MDP\_STIM\_NOD2\_TRANSDUCE HEK293T\_CELL\_DN  
GSE22611\_UNSTIM\_VS\_6H\_MDP\_STIM\_NOD2\_TRANSDUCE HEK293T\_CELL\_DN  
135 -0.29247987 -1.1931098 0.14147286  
0.2147079 1 1507 "tags=17%, list=11%, signal=19%"  
GSE17721\_4\_VS\_24H\_CPG\_BMDC\_DN GSE17721\_4\_VS\_24H\_CPG\_BMDC\_DN  
144 -0.29134887 -1.193027 0.10526316  
0.21467665 1 1679 "tags=20%, list=12%, signal=23%"  
GSE5589\_IL6\_KO\_VS\_IL10\_KO\_LPS\_STIM\_MACROPHAGE\_45MIN\_DN  
GSE5589\_IL6\_KO\_VS\_IL10\_KO\_LPS\_STIM\_MACROPHAGE\_45MIN\_DN  
149 -0.29155263 -1.1928312 0.1309298  
0.2148365 1 1844 "tags=23%, list=13%, signal=27%"  
GSE24210\_TCONV\_VS\_TREG\_UP GSE24210\_TCONV\_VS\_TREG\_UP  
140 -0.2917585 -1.1923085 0.12055336  
0.21554166 1 2342 "tags=27%, list=17%, signal=32%"  
GSE5142\_CTRL\_VS\_HTERT\_TRANSDUCE CD8\_TCELL\_EARLY\_PASSAGE\_CLONE\_UP  
GSE5142\_CTRL\_VS\_HTERT\_TRANSDUCE CD8\_TCELL\_EARLY\_PASSAGE\_CLONE\_UP  
147 -0.28578535 -1.1920404 0.11153119  
0.21583247 1 2344 "tags=27%, list=17%, signal=32%"  
GSE11961\_FOLLICULAR\_BCELL\_VS\_GERMINAL\_CENTER\_BCELL\_DAY7\_UP  
GSE11961\_FOLLICULAR\_BCELL\_VS\_GERMINAL\_CENTER\_BCELL\_DAY7\_UP  
141 -0.28846627 -1.1918993 0.123595506  
0.21590005 1 2132 "tags=25%, list=15%, signal=29%"  
GSE17974\_0H\_VS\_4H\_IN\_VITRO\_ACT\_CD4\_TCELL\_UP  
GSE17974\_0H\_VS\_4H\_IN\_VITRO\_ACT\_CD4\_TCELL\_UP  
132 -0.29447752 -1.1909658 0.14203455  
0.21730281 1 1625 "tags=17%, list=12%, signal=20%"  
GSE4748\_CTRL\_VS\_LPS\_STIM\_DC\_3H\_UP GSE4748\_CTRL\_VS\_LPS\_STIM\_DC\_3H\_UP  
161 -0.2882923 -1.1906574 0.13929313  
0.21768858 1 1943 "tags=19%, list=14%, signal=21%"  
GSE9946\_IMMATURE\_VS\_MATURE\_STIMULATORY\_DC\_DN  
GSE9946\_IMMATURE\_VS\_MATURE\_STIMULATORY\_DC\_DN  
98 -0.30765063 -1.1904298 0.14393939  
0.21789274 1 4849 "tags=39%, list=34%, signal=59%"  
GSE17974\_IL4\_AND\_ANTI\_IL12\_VS\_UNTREATED\_72H\_ACT\_CD4\_TCELL\_DN  
GSE17974\_IL4\_AND\_ANTI\_IL12\_VS\_UNTREATED\_72H\_ACT\_CD4\_TCELL\_DN  
133 -0.2938712 -1.1902746 0.13729128  
0.21795627 1 2193 "tags=26%, list=16%, signal=31%"  
GSE22886\_NAIVE\_TCELL\_VS\_MONOCYTE\_DN  
GSE22886\_NAIVE\_TCELL\_VS\_MONOCYTE\_DN  
156 -0.28513825 -1.1894251 0.13396226  
0.21927555 1 1703 "tags=21%, list=12%, signal=24%"  
GSE19888\_ADENOSINE\_A3R\_INH\_PRETREAT\_AND\_ACT\_BY\_A3R\_VS\_TCELL\_MEMBRANE  
S\_ACT\_MAST\_CELL\_UP  
GSE19888\_ADENOSINE\_A3R\_INH\_PRETREAT\_AND\_ACT\_BY\_A3R\_VS\_TCELL\_MEMBRANE  
S\_ACT\_MAST\_CELL\_UP  
144 -0.29015675 -1.1892704 0.1342155  
0.21933551 1 1770 "tags=24%, list=13%, signal=27%"  
GSE40274\_CTRL\_VS\_GATA1\_TRANSDUCE ACTIVATED\_CD4\_TCELL\_DN  
GSE40274\_CTRL\_VS\_GATA1\_TRANSDUCE ACTIVATED\_CD4\_TCELL\_DN

133 -0.29494992 -1.1892352 0.13267326  
0.21922423 1 1538 "tags=18%, list=11%, signal=20%"  
GSE21546\_UNSTIM\_VS\_ANTI\_CD3\_STIM\_SAP1A\_KO\_DP\_THYMOCYTES\_DN  
GSE21546\_UNSTIM\_VS\_ANTI\_CD3\_STIM\_SAP1A\_KO\_DP\_THYMOCYTES\_DN  
90 -0.31148556 -1.1886593 0.14545454  
0.22003676 1 4609 "tags=43%, list=33%, signal=64%"  
GSE22025\_TGFB1\_VS\_TGFB1\_AND\_PROGESTERONE\_TREATED\_CD4\_TCELL\_DN  
GSE22025\_TGFB1\_VS\_TGFB1\_AND\_PROGESTERONE\_TREATED\_CD4\_TCELL\_DN  
150 -0.28782344 -1.1880159 0.1299639  
0.22101106 1 925 "tags=11%, list=7%, signal=12%"  
GSE3982\_EOSINOPHIL\_VS\_MAC\_UP GSE3982\_EOSINOPHIL\_VS\_MAC\_UP  
135 -0.29223967 -1.1878786 0.14312617  
0.22105815 1 2619 "tags=26%, list=19%, signal=32%"  
GSE15659\_CD45RA\_NEG\_CD4\_TCELL\_VS\_NONSUPPRESSIVE\_TCELL\_UP  
GSE15659\_CD45RA\_NEG\_CD4\_TCELL\_VS\_NONSUPPRESSIVE\_TCELL\_UP  
109 -0.3033467 -1.1875472 0.14700194  
0.22149612 1 2036 "tags=18%, list=14%, signal=21%"  
GSE9509\_10MIN\_VS\_30MIN\_LPS\_STIM\_IL10\_KO\_MACROPHAGE\_DN  
GSE9509\_10MIN\_VS\_30MIN\_LPS\_STIM\_IL10\_KO\_MACROPHAGE\_DN  
132 -0.29306665 -1.1874245 0.107421875  
0.22155286 1 4123 "tags=39%, list=29%, signal=54%"  
GSE17721\_LPS\_VS\_GARDIQUIMOD\_4H\_BMDC\_UP  
GSE17721\_LPS\_VS\_GARDIQUIMOD\_4H\_BMDC\_UP  
152 -0.28350258 -1.1872005 0.12 0.22174986  
1 2344 "tags=22%, list=17%, signal=27%"  
GSE22886\_IGA\_VS\_IGM\_MEMORY\_BCELL\_DN  
GSE22886\_IGA\_VS\_IGM\_MEMORY\_BCELL\_DN  
127 -0.29036844 -1.1869353 0.1311787  
0.22203366 1 2631 "tags=25%, list=19%, signal=31%"  
GSE24634\_IL4\_VS\_CTRL\_TREATED\_NAIVE\_CD4\_TCELL\_DAY5\_DN  
GSE24634\_IL4\_VS\_CTRL\_TREATED\_NAIVE\_CD4\_TCELL\_DAY5\_DN  
128 -0.29627487 -1.1865137 0.13320826  
0.22263637 1 1766 "tags=20%, list=13%, signal=23%"  
GSE40274\_XBP1\_VS\_FOXP3\_AND\_XBP1\_TRANSDUCE\_ACTIVATED\_CD4\_TCELL\_DN  
GSE40274\_XBP1\_VS\_FOXP3\_AND\_XBP1\_TRANSDUCE\_ACTIVATED\_CD4\_TCELL\_DN  
145 -0.28687128 -1.1863049 0.115830116  
0.22281821 1 2961 "tags=30%, list=21%, signal=37%"  
GSE9037\_CTRL\_VS\_LPS\_1H\_STIM\_IRAK4\_KO\_BMDM\_DN  
GSE9037\_CTRL\_VS\_LPS\_1H\_STIM\_IRAK4\_KO\_BMDM\_DN  
145 -0.28949744 -1.1861956 0.12984496  
0.22282124 1 1962 "tags=24%, list=14%, signal=28%"  
GSE19888\_ADENOSINE\_A3R\_ACT\_VS\_TCELL\_MEMBRANES\_ACT\_AND\_A3R\_INH\_PRETRE  
AT\_IN\_MAST\_CELL\_DN  
GSE19888\_ADENOSINE\_A3R\_ACT\_VS\_TCELL\_MEMBRANES\_ACT\_AND\_A3R\_INH\_PRETRE  
AT\_IN\_MAST\_CELL\_DN  
138 -0.28788775 -1.1860596 0.14750957  
0.22288999 1 3041 "tags=28%, list=22%, signal=36%"  
GSE7548\_DAY7\_VS\_DAY28\_PCC\_IMMUNIZATION\_CD4\_TCELL\_UP  
GSE7548\_DAY7\_VS\_DAY28\_PCC\_IMMUNIZATION\_CD4\_TCELL\_UP  
155 -0.28487474 -1.1860209 0.121157326  
0.22278562 1 1498 "tags=15%, list=11%, signal=17%"  
GSE22886\_NAIVE\_TCELL\_VS\_NEUTROPHIL\_DN  
GSE22886\_NAIVE\_TCELL\_VS\_NEUTROPHIL\_DN  
136 -0.2903161 -1.1857685 0.14736842

0.22305275 1 3051 "tags=29%, list=22%, signal=37%"  
GSE43863\_NAIVE\_VS\_LY6C\_INT\_CXCR5POS\_CD4\_EFF\_TCELL\_D6\_LCMV\_UP  
GSE43863\_NAIVE\_VS\_LY6C\_INT\_CXCR5POS\_CD4\_EFF\_TCELL\_D6\_LCMV\_UP  
124 -0.29320002 -1.1855179 0.14509805  
0.22334638 1 2381 "tags=26%, list=17%, signal=31%"  
GSE19888\_ADENOSINE\_A3R\_INH\_VS\_ACT\_WITH\_INHIBITOR\_PRETREATMENT\_IN\_MAS  
T\_CELL\_UP  
GSE19888\_ADENOSINE\_A3R\_INH\_VS\_ACT\_WITH\_INHIBITOR\_PRETREATMENT\_IN\_MAS  
T\_CELL\_UP 135 -0.28765228 -1.1854378  
0.13670412 0.22332111 1 1770 "tags=19%,  
list=13%, signal=21%"  
GSE15735\_CTRL\_VS\_HDAC\_INHIBITOR\_TREATED\_CD4\_TCELL\_12H\_UP  
GSE15735\_CTRL\_VS\_HDAC\_INHIBITOR\_TREATED\_CD4\_TCELL\_12H\_UP  
145 -0.2891555 -1.1853534 0.12432432  
0.2232854 1 2283 "tags=26%, list=16%, signal=31%"  
GSE360\_CTRL\_VS\_L\_MAJOR\_DC\_DN GSE360\_CTRL\_VS\_L\_MAJOR\_DC\_DN  
148 -0.28845057 -1.1850501 0.14176245  
0.22362082 1 3083 "tags=30%, list=22%, signal=38%"  
GSE19888\_ADENOSINE\_A3R\_INH\_PRETREAT\_AND\_ACT\_BY\_A3R\_VS\_TCELL\_MEMBRANE  
S\_ACT\_MAST\_CELL\_DN  
GSE19888\_ADENOSINE\_A3R\_INH\_PRETREAT\_AND\_ACT\_BY\_A3R\_VS\_TCELL\_MEMBRANE  
S\_ACT\_MAST\_CELL\_DN  
137 -0.29130942 -1.1843547 0.12653062  
0.22465476 1 2372 "tags=25%, list=17%, signal=30%"  
GSE4590\_SMALL\_VS\_LARGE\_PRE\_BCELL\_DN  
GSE4590\_SMALL\_VS\_LARGE\_PRE\_BCELL\_DN  
125 -0.29336783 -1.183773 0.14611006  
0.22555466 1 2133 "tags=24%, list=15%, signal=28%"  
GSE46606\_UNSTIM\_VS\_CD40L\_IL2\_IL5\_3DAY\_STIMULATED\_IRF4MID\_SORTED\_BCEL  
L\_DN  
GSE46606\_UNSTIM\_VS\_CD40L\_IL2\_IL5\_3DAY\_STIMULATED\_IRF4MID\_SORTED\_BCEL  
L\_DN 151 -0.28437006 -1.1837443  
0.12172285 0.22543113 1 2238 "tags=25%,  
list=16%, signal=30%"  
GSE15930\_NAIVE\_VS\_24H\_IN\_VITRO\_STIM\_INFAB\_CD8\_TCELL\_UP  
GSE15930\_NAIVE\_VS\_24H\_IN\_VITRO\_STIM\_INFAB\_CD8\_TCELL\_UP  
162 -0.2842196 -1.1836275 0.1374502  
0.22546315 1 1462 "tags=17%, list=10%, signal=18%"  
GSE16450\_CTRL\_VS\_IFNA\_6H\_STIM\_IMMATURE\_NEURON\_CELL\_LINE\_DN  
GSE16450\_CTRL\_VS\_IFNA\_6H\_STIM\_IMMATURE\_NEURON\_CELL\_LINE\_DN  
128 -0.2885116 -1.1835147 0.12256809  
0.22549349 1 1531 "tags=21%, list=11%, signal=23%"  
GSE32034\_UNTREATED\_VS\_ROSIGLIZATONE\_TREATED\_LY6C\_HIGH\_MONOCYTE\_DN  
GSE32034\_UNTREATED\_VS\_ROSIGLIZATONE\_TREATED\_LY6C\_HIGH\_MONOCYTE\_DN  
139 -0.28920478 -1.1834246 0.14478764  
0.22547153 1 1597 "tags=20%, list=11%, signal=22%"  
GSE5542\_IFNA\_VS\_IFNA\_AND\_IFNG\_TREATED\_EPITHELIAL\_CELLS\_6H\_DN  
GSE5542\_IFNA\_VS\_IFNA\_AND\_IFNG\_TREATED\_EPITHELIAL\_CELLS\_6H\_DN  
154 -0.28831542 -1.1826733 0.13017751  
0.2266355 1 2089 "tags=23%, list=15%, signal=26%"  
GSE37301\_MULTIPOTENT\_PROGENITOR\_VS\_GRAN\_MONO\_PROGENITOR\_UP  
GSE37301\_MULTIPOTENT\_PROGENITOR\_VS\_GRAN\_MONO\_PROGENITOR\_UP  
158 -0.28465128 -1.1815263 0.12301587  
0.22849217 1 770 "tags=12%, list=5%, signal=13%"

GSE7460\_FOXP3\_MUT\_VS\_HET\_ACT\_TCONV\_DN  
GSE7460\_FOXP3\_MUT\_VS\_HET\_ACT\_TCONV\_DN  
146 -0.28133082 -1.1814779 0.11710037  
0.22841313 1 1417 "tags=14%, list=10%, signal=15%"  
GSE26912\_TUMORICIDAL\_VS\_CTRL\_MACROPHAGE\_UP  
GSE26912\_TUMORICIDAL\_VS\_CTRL\_MACROPHAGE\_UP  
154 -0.28633133 -1.1810048 0.118236475  
0.22908442 1 2138 "tags=17%, list=15%, signal=20%"  
GSE17721\_CPG\_VS\_GARDIQUIMOD\_1H\_BMDC\_UP  
GSE17721\_CPG\_VS\_GARDIQUIMOD\_1H\_BMDC\_UP  
166 -0.2844629 -1.1806247 0.13011153  
0.2295911 1 1723 "tags=19%, list=12%, signal=21%"  
GSE11057\_CD4\_EFF\_MEM\_VS\_PBMC\_UP GSE11057\_CD4\_EFF\_MEM\_VS\_PBMC\_UP  
140 -0.28682113 -1.1804824 0.12741312  
0.22966191 1 1125 "tags=16%, list=8%, signal=17%"  
GSE37532\_VISCERAL\_ADIPOSE\_TISSUE\_VS\_LN\_DERIVED\_TREG\_CD4\_TCELL\_DN  
GSE37532\_VISCERAL\_ADIPOSE\_TISSUE\_VS\_LN\_DERIVED\_TREG\_CD4\_TCELL\_DN  
115 -0.29474074 -1.1802554 0.16730037  
0.2298445 1 3041 "tags=28%, list=22%, signal=35%"  
GSE7568\_CTRL\_VS\_24H\_TGFB\_TREATED\_MACROPHAGES\_WITH\_IL4\_AND\_DEXAMETHAS  
ONE\_UP  
GSE7568\_CTRL\_VS\_24H\_TGFB\_TREATED\_MACROPHAGES\_WITH\_IL4\_AND\_DEXAMETHAS  
ONE\_UP 138 -0.2846679 -1.1802185  
0.118473895 0.2297285 1 1483 "tags=17%,  
list=11%, signal=19%"  
GSE5589\_IL6\_KO\_VS\_IL10\_KO\_LPS\_AND\_IL10\_STIM\_MACROPHAGE\_180MIN\_DN  
GSE5589\_IL6\_KO\_VS\_IL10\_KO\_LPS\_AND\_IL10\_STIM\_MACROPHAGE\_180MIN\_DN  
151 -0.28114557 -1.1796681 0.10838446  
0.23052101 1 2080 "tags=24%, list=15%, signal=28%"  
GSE5589\_LPS\_VS\_LPS\_AND\_IL10\_STIM\_IL10\_KO\_MACROPHAGE\_180MIN\_UP  
GSE5589\_LPS\_VS\_LPS\_AND\_IL10\_STIM\_IL10\_KO\_MACROPHAGE\_180MIN\_UP  
137 -0.2884843 -1.1791736 0.14694656  
0.23122084 1 4002 "tags=36%, list=28%, signal=50%"  
GSE11961\_FOLLICULAR\_BCELL\_VS\_PLASMA\_CELL\_DAY7\_UP  
GSE11961\_FOLLICULAR\_BCELL\_VS\_PLASMA\_CELL\_DAY7\_UP  
148 -0.28383327 -1.1789486 0.12969925  
0.23146434 1 1975 "tags=22%, list=14%, signal=25%"  
GSE2770\_IL12\_ACT\_VS\_ACT\_CD4\_TCELL\_6H\_DN  
GSE2770\_IL12\_ACT\_VS\_ACT\_CD4\_TCELL\_6H\_DN  
114 -0.29416072 -1.1788296 0.17216118  
0.23151174 1 1934 "tags=21%, list=14%, signal=24%"  
GSE38697\_LIGHT\_ZONE\_VS\_DARK\_ZONE\_BCELL\_UP  
GSE38697\_LIGHT\_ZONE\_VS\_DARK\_ZONE\_BCELL\_UP  
127 -0.28897503 -1.1788081 0.1575985  
0.23137552 1 2917 "tags=30%, list=21%, signal=37%"  
GSE22935\_UNSTIM\_VS\_48H\_MBOVIS\_BCG\_STIM\_MYD88\_KO\_MACROPHAGE\_DN  
GSE22935\_UNSTIM\_VS\_48H\_MBOVIS\_BCG\_STIM\_MYD88\_KO\_MACROPHAGE\_DN  
140 -0.28774017 -1.1787847 0.13127413  
0.23124345 1 2504 "tags=20%, list=18%, signal=24%"  
GSE7460\_CD8\_TCELL\_VS\_CD4\_TCELL\_ACT\_DN  
GSE7460\_CD8\_TCELL\_VS\_CD4\_TCELL\_ACT\_DN  
143 -0.29028302 -1.1786495 0.14754099  
0.23130916 1 1837 "tags=24%, list=13%, signal=28%"  
GSE21033\_1H\_VS\_12H\_POLYIC\_STIM\_DC\_DN

GSE21033\_1H\_VS\_12H\_POLYIC\_STIM\_DC\_DN  
104 -0.29951036 -1.1782773 0.1541502  
0.23179874 1 2796 "tags=31%, list=20%, signal=38%"  
GSE36888\_UNTREATED\_VS\_IL2\_TREATED\_TCELL\_17H\_UP  
GSE36888\_UNTREATED\_VS\_IL2\_TREATED\_TCELL\_17H\_UP  
139 -0.28640008 -1.1781099 0.14738806  
0.23192433 1 764 "tags=14%, list=5%, signal=14%"  
GSE22313\_HEALTHY\_VS\_SLE\_MOUSE\_CD4\_TCELL\_UP  
GSE22313\_HEALTHY\_VS\_SLE\_MOUSE\_CD4\_TCELL\_UP  
125 -0.2891513 -1.1780385 0.14478764  
0.23187882 1 2427 "tags=22%, list=17%, signal=27%"  
GSE14308\_TH17\_VS\_INDUCED\_TREG\_UP GSE14308\_TH17\_VS\_INDUCED\_TREG\_UP  
145 -0.2841142 -1.1778785 0.13111547  
0.23199019 1 1471 "tags=18%, list=10%, signal=20%"  
GSE16385\_UNTREATED\_VS\_12H\_ROSIGLITAZONE\_TREATED\_MACROPHAGE\_DN  
GSE16385\_UNTREATED\_VS\_12H\_ROSIGLITAZONE\_TREATED\_MACROPHAGE\_DN  
110 -0.29660633 -1.1777498 0.15719697  
0.2320348 1 2000 "tags=19%, list=14%, signal=22%"  
GSE9988\_LOW\_LPS\_VS\_ANTI\_TREM1\_AND\_LPS\_MONOCYTE\_DN  
GSE9988\_LOW\_LPS\_VS\_ANTI\_TREM1\_AND\_LPS\_MONOCYTE\_DN  
129 -0.29126924 -1.1777313 0.1444867  
0.23189144 1 1367 "tags=19%, list=10%, signal=20%"  
GSE3982\_DC\_VS\_BCELL\_DN GSE3982\_DC\_VS\_BCELL\_DN  
121 -0.29668844 -1.1776468 0.1693989 0.231852  
1 1715 "tags=22%, list=12%, signal=25%"  
GSE39556\_UNTREATED\_VS\_3H\_POLYIC\_INJ\_MOUSE\_CD8A\_DC\_UP  
GSE39556\_UNTREATED\_VS\_3H\_POLYIC\_INJ\_MOUSE\_CD8A\_DC\_UP  
153 -0.28654608 -1.1766998 0.13528337  
0.23344055 1 1536 "tags=18%, list=11%, signal=20%"  
GSE13484\_3H\_UNSTIM\_VS\_YF17D\_VACCINE\_STIM\_PBMC\_DN  
GSE13484\_3H\_UNSTIM\_VS\_YF17D\_VACCINE\_STIM\_PBMC\_DN  
147 -0.28274167 -1.17653 0.1344697 0.2335725  
1 1665 "tags=21%, list=12%, signal=24%"  
GSE16755\_CTRL\_VS\_IFNA\_TREATED\_MAC\_UP  
GSE16755\_CTRL\_VS\_IFNA\_TREATED\_MAC\_UP  
134 -0.2929363 -1.1764781 0.16856061  
0.23350562 1 2467 "tags=26%, list=17%, signal=31%"  
GSE4984\_GALECTIN1\_VS\_VEHCLE\_CTRL\_TREATED\_DC\_UP  
GSE4984\_GALECTIN1\_VS\_VEHCLE\_CTRL\_TREATED\_DC\_UP  
122 -0.29362142 -1.1763954 0.14925373  
0.23347999 1 1604 "tags=20%, list=11%, signal=23%"  
GSE369\_PRE\_VS\_POST\_IL6\_INJECTION\_IFNG\_WT\_LIVER\_UP  
GSE369\_PRE\_VS\_POST\_IL6\_INJECTION\_IFNG\_WT\_LIVER\_UP  
138 -0.28978318 -1.1763543 0.1597633  
0.23337506 1 1591 "tags=14%, list=11%, signal=15%"  
GSE28449\_WT\_VS\_LRF\_KO\_GERMINAL\_CENTER\_BCELL\_UP  
GSE28449\_WT\_VS\_LRF\_KO\_GERMINAL\_CENTER\_BCELL\_UP  
142 -0.28789324 -1.1762958 0.15879017  
0.23329704 1 3383 "tags=31%, list=24%, signal=40%"  
GSE8685\_IL2\_ACT\_IL2\_STARVED\_VS\_IL21\_ACT\_IL2\_STARVED\_CD4\_TCELL\_DN  
GSE8685\_IL2\_ACT\_IL2\_STARVED\_VS\_IL21\_ACT\_IL2\_STARVED\_CD4\_TCELL\_DN  
104 -0.29662427 -1.176162 0.15869981  
0.23334397 1 3927 "tags=38%, list=28%, signal=52%"  
GSE2585\_CTEC\_VS\_MTEC\_THYMUS\_UP GSE2585\_CTEC\_VS\_MTEC\_THYMUS\_UP



|                                                             |     |             |                                  |            |
|-------------------------------------------------------------|-----|-------------|----------------------------------|------------|
| 0.23548411                                                  | 148 | -0.2845212  | -1.1749004                       | 0.14897579 |
| GSE9037_CTRL_VS_LPS_4H_STIM_IRAK4_KO_BMDM_DN                | 1   | 2075        | "tags=20%, list=15%, signal=24%" |            |
| GSE9037_CTRL_VS_LPS_4H_STIM_IRAK4_KO_BMDM_DN                |     |             |                                  |            |
| 0.23606123                                                  | 153 | -0.28299674 | -1.1744806                       | 0.12820514 |
| GSE369_SOCS3_KO_VS_IFNG_KO_LIVER_UP                         | 1   | 2287        | "tags=22%, list=16%, signal=25%" |            |
| GSE369_SOCS3_KO_VS_IFNG_KO_LIVER_UP                         |     |             |                                  |            |
| 0.2359255                                                   | 127 | -0.29200482 | -1.1744562                       | 0.16666667 |
| GSE37605_TREG_VS_TCONV_NOD_FOXP3_FUSION_GFP_DN              | 1   | 3052        | "tags=26%, list=22%, signal=33%" |            |
| GSE37605_TREG_VS_TCONV_NOD_FOXP3_FUSION_GFP_DN              |     |             |                                  |            |
| 0.23653586                                                  | 134 | -0.28689983 | -1.1740195                       | 0.16111112 |
| GSE19941_UNSTIM_VS_LPS_AND_IL10_STIM_IL10_KO_MACROPHAGE_UP  | 1   | 2631        | "tags=25%, list=19%, signal=31%" |            |
| GSE19941_UNSTIM_VS_LPS_AND_IL10_STIM_IL10_KO_MACROPHAGE_UP  |     |             |                                  |            |
| 0.2367089                                                   | 152 | -0.28191292 | -1.1738335                       | 0.1344383  |
| GSE2770_UNTREATED_VS_IL12_TREATED_ACT_CD4_TCELL_6H_UP       | 1   | 1731        | "tags=19%, list=12%, signal=22%" |            |
| GSE2770_UNTREATED_VS_IL12_TREATED_ACT_CD4_TCELL_6H_UP       |     |             |                                  |            |
| 0.23714498                                                  | 144 | -0.28249267 | -1.1734979                       | 0.12569316 |
| GSE37533_PPARG1_FOXP3_VS_PPARG2_FOXP3_TRANSDUCECD4_TCELL_DN | 1   | 2052        | "tags=23%, list=15%, signal=27%" |            |
| GSE37533_PPARG1_FOXP3_VS_PPARG2_FOXP3_TRANSDUCECD4_TCELL_DN |     |             |                                  |            |
| 0.2372762                                                   | 119 | -0.29590017 | -1.1733313                       | 0.17448406 |
| GSE22589_SIV_VS_HIV_AND_SIV_INFECTED_DC_UP                  | 1   | 2028        | "tags=24%, list=14%, signal=28%" |            |
| GSE22589_SIV_VS_HIV_AND_SIV_INFECTED_DC_UP                  |     |             |                                  |            |
| 0.23722237                                                  | 141 | -0.28554055 | -1.1732562                       | 0.15779468 |
| GSE16755_CTRL_VS_IFNA_TREATED_MAC_DN                        | 1   | 1463        | "tags=15%, list=10%, signal=16%" |            |
| GSE16755_CTRL_VS_IFNA_TREATED_MAC_DN                        |     |             |                                  |            |
| 0.23807219                                                  | 144 | -0.28390768 | -1.1727191                       | 0.1409002  |
| GSE36392_EOSINOPHIL_VS_MAC_IL25_TREATED_LUNG_UP             | 1   | 1546        | "tags=19%, list=11%, signal=22%" |            |
| GSE36392_EOSINOPHIL_VS_MAC_IL25_TREATED_LUNG_UP             |     |             |                                  |            |
| 0.23799133                                                  | 155 | -0.28024167 | -1.1726664                       | 0.13718411 |
| GSE6681_DELETED_FOXP3_VS_WT_TREG_DN                         | 1   | 3469        | "tags=25%, list=25%, signal=33%" |            |
| GSE6681_DELETED_FOXP3_VS_WT_TREG_DN                         |     |             |                                  |            |
| 0.23803256                                                  | 153 | -0.28079212 | -1.1725512                       | 0.15607986 |
| GSE11057_PBMC_VS_MEM_CD4_TCELL_UP                           | 1   | 1817        | "tags=22%, list=13%, signal=25%" |            |
| GSE11057_PBMC_VS_MEM_CD4_TCELL_UP                           |     |             |                                  |            |
| 0.23812689                                                  | 136 | -0.289231   | -1.172398                        | 0.17095588 |
| GSE360_L_MAJOR_VS_T_GONDII_DC_DN                            | 1   | 2693        | "tags=24%, list=19%, signal=29%" |            |
| GSE360_L_MAJOR_VS_T_GONDII_DC_DN                            |     |             |                                  |            |
| 0.23812123                                                  | 137 | -0.2819211  | -1.1723063                       | 0.13188976 |
| GSE17974_CTRL_VS_ACT_IL4_AND_ANTI_IL12_0.5H_CD4_TCELL_UP    | 1   | 3024        | "tags=26%, list=21%, signal=32%" |            |
| GSE17974_CTRL_VS_ACT_IL4_AND_ANTI_IL12_0.5H_CD4_TCELL_UP    |     |             |                                  |            |
| 0.23886053                                                  | 102 | -0.30239558 | -1.1718221                       | 0.16541353 |
| GSE41867_DAY6_VS_DAY8_LCMV_CLONE13_EFFECTOR_CD8_TCELL_DN    | 1   | 5026        | "tags=41%, list=36%, signal=63%" |            |
| GSE41867_DAY6_VS_DAY8_LCMV_CLONE13_EFFECTOR_CD8_TCELL_DN    |     |             |                                  |            |

138        -0.28641742        -1.1715474        0.14734773  
0.23918098        1        1715        "tags=20%, list=12%, signal=22%"  
GSE35685\_CD34POS\_CD38NEG\_VS\_CD34POS\_CD10POS\_BONE\_MARROW\_DN  
GSE35685\_CD34POS\_CD38NEG\_VS\_CD34POS\_CD10POS\_BONE\_MARROW\_DN  
148        -0.28280815        -1.1710929        0.14391144  
0.23983315        1        770        "tags=15%, list=5%, signal=16%"  
GSE35825\_UNTREATED\_VS\_IFNG\_STIM\_MACROPHAGE\_DN  
GSE35825\_UNTREATED\_VS\_IFNG\_STIM\_MACROPHAGE\_DN  
144        -0.28514174        -1.171004        0.16159695  
0.23981106        1        1968        "tags=24%, list=14%, signal=27%"  
GSE5589\_WT\_VS\_IL10\_KO\_LPS\_STIM\_MACROPHAGE\_45MIN\_DN  
GSE5589\_WT\_VS\_IL10\_KO\_LPS\_STIM\_MACROPHAGE\_45MIN\_DN  
144        -0.28248936        -1.1708789        0.15444015  
0.2398469        1        3481        "tags=31%, list=25%, signal=41%"  
GSE32423\_CTRL\_VS\_IL7\_MEMORY\_CD8\_TCELL\_DN  
GSE32423\_CTRL\_VS\_IL7\_MEMORY\_CD8\_TCELL\_DN  
141        -0.28647557        -1.1708021        0.17021276  
0.23981734        1        2754        "tags=24%, list=20%, signal=30%"  
GSE23502\_WT\_VS\_HDC\_KO\_MYELOID\_DERIVED\_SUPPRESSOR\_CELL\_BM\_DN  
GSE23502\_WT\_VS\_HDC\_KO\_MYELOID\_DERIVED\_SUPPRESSOR\_CELL\_BM\_DN  
145        -0.28353468        -1.1705264        0.13384321  
0.24012566        1        1126        "tags=19%, list=8%, signal=20%"  
GSE32034\_LY6C\_HIGH\_VS\_LOW\_MONOCYTE\_DN  
GSE32034\_LY6C\_HIGH\_VS\_LOW\_MONOCYTE\_DN  
146        -0.2855731        -1.1699523        0.13711151  
0.24102151        1        1870        "tags=24%, list=13%, signal=27%"  
GSE3982\_DC\_VS\_NKCELL\_DN        GSE3982\_DC\_VS\_NKCELL\_DN  
124        -0.2882664        -1.1698408        0.14068441  
0.24103366        1        2306        "tags=27%, list=16%, signal=32%"  
GSE3982\_EFF\_MEMORY\_CD4\_TCELL\_VS\_NKCELL\_UP  
GSE3982\_EFF\_MEMORY\_CD4\_TCELL\_VS\_NKCELL\_UP  
127        -0.2894528        -1.169641        0.16377649  
0.24121536        1        2562        "tags=24%, list=18%, signal=30%"  
GSE10325\_LUPUS\_CD4\_TCELL\_VS\_LUPUS\_BCELL\_UP  
GSE10325\_LUPUS\_CD4\_TCELL\_VS\_LUPUS\_BCELL\_UP  
157        -0.28029177        -1.1693854        0.12749004  
0.24154735        1        1231        "tags=15%, list=9%, signal=17%"  
GSE27670\_CTRL\_VS\_BLIMP1\_TRANSDUCED\_GC\_BCELL\_DN  
GSE27670\_CTRL\_VS\_BLIMP1\_TRANSDUCED\_GC\_BCELL\_DN  
154        -0.28189266        -1.169242        0.15637065  
0.24163625        1        2122        "tags=19%, list=15%, signal=23%"  
GSE29618\_PRE\_VS\_DAY7\_POST\_LAIV\_FLU\_VACCINE\_BCELL\_DN  
GSE29618\_PRE\_VS\_DAY7\_POST\_LAIV\_FLU\_VACCINE\_BCELL\_DN  
135        -0.2829192        -1.1686702        0.15799257  
0.24250557        1        1582        "tags=19%, list=11%, signal=21%"  
GSE25085\_FETAL\_BM\_VS\_ADULT\_BM\_SP4\_THYMIC\_IMPLANT\_DN  
GSE25085\_FETAL\_BM\_VS\_ADULT\_BM\_SP4\_THYMIC\_IMPLANT\_DN  
152        -0.27919018        -1.1681294        0.16165413  
0.24332057        1        1770        "tags=22%, list=13%, signal=25%"  
GSE13485\_DAY1\_VS\_DAY3\_YF17D\_VACCINE\_PBMC\_DN  
GSE13485\_DAY1\_VS\_DAY3\_YF17D\_VACCINE\_PBMC\_DN  
125        -0.2888945        -1.1676648        0.17358491  
0.24398856        1        1295        "tags=19%, list=9%, signal=21%"  
GSE9037\_CTRL\_VS\_LPS\_1H\_STIM\_BMDM\_DN

GSE9037\_CTRL\_VS\_LPS\_1H\_STIM\_BMDM\_DN  
151 -0.27941072 -1.1674589 0.13539653  
0.24417876 1 1674 "tags=17%, list=12%, signal=19%"  
GSE40274\_FOXP3\_VS\_FOXP3\_AND\_LEF1\_TRANSDUCED\_ACTIVATED\_CD4\_TCELL\_DN  
GSE40274\_FOXP3\_VS\_FOXP3\_AND\_LEF1\_TRANSDUCED\_ACTIVATED\_CD4\_TCELL\_DN  
148 -0.28368506 -1.1670552 0.14661655  
0.24475679 1 1942 "tags=20%, list=14%, signal=22%"  
GSE5455\_EX\_VIVO\_VS\_POST\_24H\_INCUBATION\_MONOCYTES\_FROM\_TUMOR\_BEARING\_MOUSE\_DN  
GSE5455\_EX\_VIVO\_VS\_POST\_24H\_INCUBATION\_MONOCYTES\_FROM\_TUMOR\_BEARING\_MOUSE\_DN  
141 -0.28056565 -1.1654868  
0.13450292 0.24756776 1 2236 "tags=24%, list=16%, signal=28%"  
GSE45739\_NRAS\_KO\_VS\_WT\_ACD3\_ACD28\_STIM\_CD4\_TCELL\_DN  
GSE45739\_NRAS\_KO\_VS\_WT\_ACD3\_ACD28\_STIM\_CD4\_TCELL\_DN  
132 -0.28589478 -1.1653135 0.15238096  
0.24773277 1 2287 "tags=24%, list=16%, signal=29%"  
GSE20727\_ROS\_INH\_VS\_ROS\_INH\_AND\_DNFB\_ALLERGEN\_TREATED\_DC\_DN  
GSE20727\_ROS\_INH\_VS\_ROS\_INH\_AND\_DNFB\_ALLERGEN\_TREATED\_DC\_DN  
110 -0.29515073 -1.1652842 0.18014705  
0.24760383 1 3746 "tags=27%, list=27%, signal=37%"  
GSE14769\_UNSTIM\_VS\_20MIN\_LPS\_BMDM\_UP  
GSE14769\_UNSTIM\_VS\_20MIN\_LPS\_BMDM\_UP  
141 -0.2870881 -1.164337 0.1539924  
0.24918231 1 2857 "tags=21%, list=20%, signal=26%"  
GSE6269\_E\_COLI\_VS\_STAPH\_AUREUS\_INF\_PBMC\_UP  
GSE6269\_E\_COLI\_VS\_STAPH\_AUREUS\_INF\_PBMC\_UP  
115 -0.2895306 -1.1643103 0.17373738  
0.24904637 1 2137 "tags=23%, list=15%, signal=27%"  
GSE30083\_SP2\_VS\_SP4\_THYMOCYTE\_UP GSE30083\_SP2\_VS\_SP4\_THYMOCYTE\_UP  
148 -0.282206 -1.1635017 0.14862385  
0.2503427 1 4165 "tags=33%, list=30%, signal=46%"  
GSE11057\_NAIVE\_CD4\_VS\_PBMC\_CD4\_TCELL\_UP  
GSE11057\_NAIVE\_CD4\_VS\_PBMC\_CD4\_TCELL\_UP  
117 -0.29324862 -1.1634098 0.18430656  
0.2503577 1 1837 "tags=20%, list=13%, signal=22%"  
GSE24142\_DN2\_VS\_DN3\_THYMOCYTE\_ADULT\_DN  
GSE24142\_DN2\_VS\_DN3\_THYMOCYTE\_ADULT\_DN  
140 -0.28268954 -1.1634037 0.17260788  
0.2501846 1 1264 "tags=15%, list=9%, signal=16%"  
GSE5589\_WT\_VS\_IL6\_KO\_LPS\_STIM\_MACROPHAGE\_180MIN\_UP  
GSE5589\_WT\_VS\_IL6\_KO\_LPS\_STIM\_MACROPHAGE\_180MIN\_UP  
101 -0.29667568 -1.1632061 0.20817845  
0.2503657 1 3132 "tags=26%, list=22%, signal=33%"  
GSE2706\_2H\_VS\_8H\_R848\_AND\_LPS\_STIM\_DC\_DN  
GSE2706\_2H\_VS\_8H\_R848\_AND\_LPS\_STIM\_DC\_DN  
127 -0.28615072 -1.1628041 0.17260788  
0.25095809 1 2047 "tags=20%, list=15%, signal=24%"  
GSE13522\_CTRL\_VS\_T\_CRUZI\_G\_STRAIN\_INF\_SKIN\_UP  
GSE13522\_CTRL\_VS\_T\_CRUZI\_G\_STRAIN\_INF\_SKIN\_UP  
144 -0.28211963 -1.1626085 0.17588933  
0.25114995 1 1851 "tags=23%, list=13%, signal=26%"  
GSE24142\_EARLY\_THYMIC\_PROGENITOR\_VS\_DN3\_THYMOCYTE\_DN  
GSE24142\_EARLY\_THYMIC\_PROGENITOR\_VS\_DN3\_THYMOCYTE\_DN

162 -0.27899367 -1.161993 0.1391129  
0.2521311 1 2028 "tags=22%, list=14%, signal=26%"  
GSE12963\_UNINF\_VS\_ENV\_AND\_NEF\_DEFICIENT\_HIV1\_INF\_CD4\_TCELL\_UP  
GSE12963\_UNINF\_VS\_ENV\_AND\_NEF\_DEFICIENT\_HIV1\_INF\_CD4\_TCELL\_UP  
106 -0.292956 -1.1617459 0.17137477  
0.2524303 1 1996 "tags=22%, list=14%, signal=25%"  
GSE37532\_WT\_VS\_PPARG\_KO\_LN\_TREG\_DN  
GSE37532\_WT\_VS\_PPARG\_KO\_LN\_TREG\_DN  
88 -0.3043599 -1.1614915 0.17765568  
0.2527356 1 5928 "tags=47%, list=42%, signal=80%"  
GSE14000\_4H\_VS\_16H\_LPS\_DC\_TRANSLATED\_RNA\_UP  
GSE14000\_4H\_VS\_16H\_LPS\_DC\_TRANSLATED\_RNA\_UP  
141 -0.2793776 -1.1612916 0.13831776  
0.25292617 1 1823 "tags=20%, list=13%, signal=23%"  
GSE7831\_UNSTIM\_VS\_INFLUENZA\_STIM\_PDC\_1H\_DN  
GSE7831\_UNSTIM\_VS\_INFLUENZA\_STIM\_PDC\_1H\_DN  
139 -0.2856523 -1.1611848 0.16061185  
0.2529388 1 1827 "tags=22%, list=13%, signal=25%"  
GSE43955\_TH0\_VS\_TGFB\_IL6\_TH17\_ACT\_CD4\_TCELL\_20H\_UP  
GSE43955\_TH0\_VS\_TGFB\_IL6\_TH17\_ACT\_CD4\_TCELL\_20H\_UP  
152 -0.2802278 -1.1611212 0.14531548  
0.25288123 1 2615 "tags=28%, list=19%, signal=34%"  
GSE17721\_CTRL\_VS\_CPG\_2H\_BMDC\_DN GSE17721\_CTRL\_VS\_CPG\_2H\_BMDC\_DN  
157 -0.28061008 -1.1610469 0.16334662  
0.2528501 1 2000 "tags=20%, list=14%, signal=23%"  
GSE39820\_CTRL\_VS\_IL1B\_IL6\_CD4\_TCELL\_DN  
GSE39820\_CTRL\_VS\_IL1B\_IL6\_CD4\_TCELL\_DN  
146 -0.2794856 -1.1608456 0.1539961  
0.2530739 1 1890 "tags=20%, list=13%, signal=23%"  
GSE24142\_EARLY\_THYMIC\_PROGENITOR\_VS\_DN2\_THYMOCYTE\_FETAL\_DN  
GSE24142\_EARLY\_THYMIC\_PROGENITOR\_VS\_DN2\_THYMOCYTE\_FETAL\_DN  
156 -0.2781436 -1.1606694 0.15605749  
0.2532402 1 2096 "tags=21%, list=15%, signal=25%"  
GSE41176\_UNSTIM\_VS\_ANTI\_IGM\_STIM\_BCELL\_24H\_DN  
GSE41176\_UNSTIM\_VS\_ANTI\_IGM\_STIM\_BCELL\_24H\_DN  
144 -0.2820912 -1.1605579 0.14931238  
0.2532385 1 1329 "tags=18%, list=9%, signal=20%"  
GSE24142\_DN2\_VS\_DN3\_THYMOCYTE\_FETAL\_UP  
GSE24142\_DN2\_VS\_DN3\_THYMOCYTE\_FETAL\_UP  
156 -0.27828848 -1.160468 0.14821763  
0.25321704 1 1455 "tags=17%, list=10%, signal=18%"  
GSE21360\_NAIVE\_VS\_PRIMARY\_MEMORY\_CD8\_TCELL\_DN  
GSE21360\_NAIVE\_VS\_PRIMARY\_MEMORY\_CD8\_TCELL\_DN  
147 -0.28047407 -1.1601803 0.14559387  
0.25357834 1 2344 "tags=25%, list=17%, signal=30%"  
GSE39820\_TGFBETA3\_IL6\_VS\_TGFBETA3\_IL6\_IL23A\_TREATED\_CD4\_TCELL\_UP  
GSE39820\_TGFBETA3\_IL6\_VS\_TGFBETA3\_IL6\_IL23A\_TREATED\_CD4\_TCELL\_UP  
146 -0.27894124 -1.1600342 0.14990138  
0.2536583 1 2992 "tags=27%, list=21%, signal=34%"  
GSE13306\_RA\_VS\_UNTREATED\_TREG\_UP GSE13306\_RA\_VS\_UNTREATED\_TREG\_UP  
142 -0.28036672 -1.1591849 0.16853933  
0.25510913 1 1953 "tags=21%, list=14%, signal=24%"  
GSE2405\_0H\_VS\_6H\_A\_PHAGOCYTOPHILUM\_STIM\_NEUTROPHIL\_UP  
GSE2405\_0H\_VS\_6H\_A\_PHAGOCYTOPHILUM\_STIM\_NEUTROPHIL\_UP

131 -0.28686497 -1.1591334 0.15151516  
0.25502166 1 1110 "tags=17%, list=8%, signal=18%"  
GSE1460\_CD4\_THYMOCYTE\_VS\_NAIVE\_CD4\_TCELL\_CORD\_BLOOD\_DN  
GSE1460\_CD4\_THYMOCYTE\_VS\_NAIVE\_CD4\_TCELL\_CORD\_BLOOD\_DN  
129 -0.28675565 -1.1586211 0.18252428  
0.25581354 1 717 "tags=10%, list=5%, signal=11%"  
GSE6674\_PL2\_3\_VS\_ANTI\_IGM\_AND\_CPG\_STIM\_BCELL\_DN  
GSE6674\_PL2\_3\_VS\_ANTI\_IGM\_AND\_CPG\_STIM\_BCELL\_DN  
147 -0.2801512 -1.158526 0.16058394  
0.25582185 1 661 "tags=12%, list=5%, signal=13%"  
GSE37416\_0H\_VS\_6H\_F\_TULARENSIS\_LVS\_NEUTROPHIL\_DN  
GSE37416\_0H\_VS\_6H\_F\_TULARENSIS\_LVS\_NEUTROPHIL\_DN  
142 -0.28320074 -1.1581 0.17142858 0.2564421  
1 1285 "tags=19%, list=9%, signal=21%"  
GSE2706\_2H\_VS\_8H\_LPS\_STIM\_DC\_DN GSE2706\_2H\_VS\_8H\_LPS\_STIM\_DC\_DN  
114 -0.29342207 -1.1575094 0.20281124  
0.2573914 1 2486 "tags=29%, list=18%, signal=35%"  
GSE37532\_VISCERAL\_ADIPOSE\_TISSUE\_VS\_LN\_DERIVED\_PPARG\_KO\_TCONV\_CD4\_TCELL\_DN  
GSE37532\_VISCERAL\_ADIPOSE\_TISSUE\_VS\_LN\_DERIVED\_PPARG\_KO\_TCONV\_CD4\_TCELL\_DN  
72 -0.31559896 -1.156401  
0.20437956 0.25940353 1 3819 "tags=33%,  
list=27%, signal=45%"  
GSE9946\_MATURE\_STIMULATORY\_VS\_PROSTAGLANDINE2\_TREATED\_MATURE\_DC\_UP  
GSE9946\_MATURE\_STIMULATORY\_VS\_PROSTAGLANDINE2\_TREATED\_MATURE\_DC\_UP  
89 -0.2995565 -1.1560391 0.1747212  
0.25991586 1 1811 "tags=20%, list=13%, signal=23%"  
GSE8685\_IL15\_ACT\_IL2\_STARVED\_VS\_IL21\_ACT\_IL2\_STARVED\_CD4\_TCELL\_DN  
GSE8685\_IL15\_ACT\_IL2\_STARVED\_VS\_IL21\_ACT\_IL2\_STARVED\_CD4\_TCELL\_DN  
132 -0.28458124 -1.1558971 0.17988394  
0.26002952 1 1712 "tags=20%, list=12%, signal=22%"  
GSE24726\_WT\_VS\_E2\_2\_KO\_PDC\_DAY6\_POST\_DELETION\_DN  
GSE24726\_WT\_VS\_E2\_2\_KO\_PDC\_DAY6\_POST\_DELETION\_DN  
153 -0.27745277 -1.155412 0.16360295  
0.26079816 1 2280 "tags=25%, list=16%, signal=30%"  
GSE17974\_CTRL\_VS\_ACT\_IL4\_AND\_ANTI\_IL12\_1H\_CD4\_TCELL\_UP  
GSE17974\_CTRL\_VS\_ACT\_IL4\_AND\_ANTI\_IL12\_1H\_CD4\_TCELL\_UP  
127 -0.28516662 -1.1548287 0.17919075  
0.26171753 1 2487 "tags=25%, list=18%, signal=30%"  
GSE10325\_CD4\_TCELL\_VS\_LUPUS\_CD4\_TCELL\_DN  
GSE10325\_CD4\_TCELL\_VS\_LUPUS\_CD4\_TCELL\_DN  
134 -0.28275478 -1.1538925 0.18669131  
0.26330984 1 1912 "tags=24%, list=14%, signal=27%"  
GSE30971\_WBP7\_HET\_VS\_KO\_MACROPHAGE\_4H\_LPS\_STIM\_UP  
GSE30971\_WBP7\_HET\_VS\_KO\_MACROPHAGE\_4H\_LPS\_STIM\_UP  
137 -0.2847386 -1.1537621 0.17680608  
0.2633867 1 1680 "tags=21%, list=12%, signal=24%"  
GSE18281\_SUBCAPSULAR\_CORTICAL\_REGION\_VS\_WHOLE\_MEDULLA\_THYMUS\_DN  
GSE18281\_SUBCAPSULAR\_CORTICAL\_REGION\_VS\_WHOLE\_MEDULLA\_THYMUS\_DN  
141 -0.27614772 -1.1534857 0.14285715  
0.26373377 1 2636 "tags=18%, list=19%, signal=22%"  
GSE14769\_UNSTIM\_VS\_40MIN\_LPS\_BMDM\_UP  
GSE14769\_UNSTIM\_VS\_40MIN\_LPS\_BMDM\_UP  
141 -0.277864 -1.1531981 0.16788322

0.26409924 1 4283 "tags=37%, list=30%, signal=52%"  
GSE9988\_ANTI\_TREM1\_VS\_LPS\_MONOCYTE\_UP  
GSE9988\_ANTI\_TREM1\_VS\_LPS\_MONOCYTE\_UP  
147 -0.28258258 -1.1528947 0.17210145  
0.26448727 1 1712 "tags=22%, list=12%, signal=25%"  
GSE34156\_TLR1\_TLR2\_LIGAND\_VS\_NOD2\_AND\_TLR1\_TLR2\_LIGAND\_6H\_TREATED\_MO  
NOCYTE\_DN  
GSE34156\_TLR1\_TLR2\_LIGAND\_VS\_NOD2\_AND\_TLR1\_TLR2\_LIGAND\_6H\_TREATED\_MO  
NOCYTE\_DN 101 -0.2931948 -1.152874  
0.20488721 0.2643408 1 2519 "tags=25%,  
list=18%, signal=30%"  
GSE40274\_HELIOS\_VS\_FOXP3\_AND\_HELIOS\_TRANSDUCECD\_ACTIVATED\_CD4\_TCELL\_D  
N  
GSE40274\_HELIOS\_VS\_FOXP3\_AND\_HELIOS\_TRANSDUCECD\_ACTIVATED\_CD4\_TCELL\_D  
N 143 -0.28008422 -1.1524769  
0.1743295 0.26490697 1 1399 "tags=19%,  
list=10%, signal=21%"  
GSE18281\_CORTICAL\_THYMOCYTE\_VS\_WHOLE\_CORTEX\_THYMUS\_UP  
GSE18281\_CORTICAL\_THYMOCYTE\_VS\_WHOLE\_CORTEX\_THYMUS\_UP  
149 -0.27775088 -1.15234 0.162 0.264976 1  
5487 "tags=45%, list=39%, signal=73%"  
GSE13738\_TCR\_VS\_BYSTANDER\_ACTIVATED\_CD4\_TCELL\_DN  
GSE13738\_TCR\_VS\_BYSTANDER\_ACTIVATED\_CD4\_TCELL\_DN  
133 -0.27787286 -1.1520265 0.18181819  
0.2653821 1 2139 "tags=25%, list=15%, signal=29%"  
GSE22886\_NAIVE\_CD8\_TCELL\_VS\_MONOCYTE\_DN  
GSE22886\_NAIVE\_CD8\_TCELL\_VS\_MONOCYTE\_DN  
154 -0.2771664 -1.151649 0.16171004 0.265902  
1 1703 "tags=19%, list=12%, signal=22%"  
GSE17974\_0H\_VS\_1H\_IN\_VITRO\_ACT\_CD4\_TCELL\_DN  
GSE17974\_0H\_VS\_1H\_IN\_VITRO\_ACT\_CD4\_TCELL\_DN  
130 -0.2788057 -1.1508341 0.16171004  
0.2673389 1 2402 "tags=29%, list=17%, signal=35%"  
GSE2405\_HEAT\_KILLED\_LYSATE\_VS\_LIVE\_A\_PHAGOCYTOPHILUM\_STIM\_NEUTROPHIL  
\_24H\_UP  
GSE2405\_HEAT\_KILLED\_LYSATE\_VS\_LIVE\_A\_PHAGOCYTOPHILUM\_STIM\_NEUTROPHIL  
\_24H\_UP 162 -0.2746856 -1.1504494  
0.18076923 0.26791298 1 2828 "tags=31%,  
list=20%, signal=39%"  
GSE43955\_TH0\_VS\_TGFB\_IL6\_TH17\_ACT\_CD4\_TCELL\_30H\_UP  
GSE43955\_TH0\_VS\_TGFB\_IL6\_TH17\_ACT\_CD4\_TCELL\_30H\_UP  
162 -0.27292773 -1.1495215 0.19135803  
0.26954627 1 2450 "tags=23%, list=17%, signal=27%"  
GSE19888\_NO\_PRETREAT\_VS\_ADENOSINE\_A3R\_INHIBITOR\_PRETREATED\_MAST\_CELL  
\_TCELL\_MEMBRANES\_ACT\_DN  
GSE19888\_NO\_PRETREAT\_VS\_ADENOSINE\_A3R\_INHIBITOR\_PRETREATED\_MAST\_CELL  
\_TCELL\_MEMBRANES\_ACT\_DN  
143 -0.27605847 -1.1488594 0.17196262  
0.27063555 1 1467 "tags=20%, list=10%, signal=22%"  
GSE14908\_RESTING\_VS\_HDM\_STIM\_CD4\_TCELL\_NONATOPIC\_PATIENT\_DN  
GSE14908\_RESTING\_VS\_HDM\_STIM\_CD4\_TCELL\_NONATOPIC\_PATIENT\_DN  
147 -0.277843 -1.1488165 0.1641791  
0.27053544 1 2288 "tags=26%, list=16%, signal=31%"  
GSE3982\_MAST\_CELL\_VS\_NKCELL\_UP GSE3982\_MAST\_CELL\_VS\_NKCELL\_UP

|                                                                      |     |             |      |            |            |                                  |
|----------------------------------------------------------------------|-----|-------------|------|------------|------------|----------------------------------|
| 0.27049333                                                           | 146 | -0.28023407 | 1507 | -1.14873   | 0.18878505 | "tags=19%, list=11%, signal=21%" |
| GSE39820_CTRL_VS_IL1B_IL6_CD4_TCELL_UP                               |     |             |      |            |            |                                  |
| GSE39820_CTRL_VS_IL1B_IL6_CD4_TCELL_UP                               |     |             |      |            |            |                                  |
| 0.27094254                                                           | 143 | -0.2814285  | 1909 | -1.148403  | 0.18738404 | "tags=26%, list=14%, signal=30%" |
| GSE3982_BCELL_VS_CENT_MEMORY_CD4_TCELL_UP                            |     |             |      |            |            |                                  |
| GSE3982_BCELL_VS_CENT_MEMORY_CD4_TCELL_UP                            |     |             |      |            |            |                                  |
| 0.27189088                                                           | 137 | -0.27925816 | 2162 | -1.1478415 | 0.17311233 | "tags=22%, list=15%, signal=26%" |
| GSE44649_WT_VS_MIR155_KO_ACTIVATED_CD8_TCELL_UP                      |     |             |      |            |            |                                  |
| GSE44649_WT_VS_MIR155_KO_ACTIVATED_CD8_TCELL_UP                      |     |             |      |            |            |                                  |
| 0.27184668                                                           | 143 | -0.27473253 | 2491 | -1.1477696 | 0.17115384 | "tags=25%, list=18%, signal=30%" |
| GSE36476_CTRL_VS_TSST_ACT_16H_MEMORY_CD4_TCELL_OLD_UP                |     |             |      |            |            |                                  |
| GSE36476_CTRL_VS_TSST_ACT_16H_MEMORY_CD4_TCELL_OLD_UP                |     |             |      |            |            |                                  |
| 0.27293962                                                           | 135 | -0.282328   | 1625 | -1.1471128 | 0.15327103 | "tags=21%, list=12%, signal=23%" |
| GSE17721_0.5H_VS_12H_CPG_BMDC_DN                                     |     |             |      |            |            |                                  |
| GSE17721_0.5H_VS_12H_CPG_BMDC_DN                                     |     |             |      |            |            |                                  |
| 0.2730839                                                            | 156 | -0.2739415  | 2473 | -1.1469383 | 0.15254237 | "tags=23%, list=18%, signal=28%" |
| GSE16385_MONOCYTE_VS_12H_ROSIGLITAZONE_IFNG_TNF_TREATED_MACROPHAGE_U |     |             |      |            |            |                                  |
| GSE16385_MONOCYTE_VS_12H_ROSIGLITAZONE_IFNG_TNF_TREATED_MACROPHAGE_U |     |             |      |            |            |                                  |
| GSE16385_MONOCYTE_VS_12H_ROSIGLITAZONE_IFNG_TNF_TREATED_MACROPHAGE_U |     |             |      |            |            |                                  |
| 0.18359375                                                           | 148 | -0.27618566 | 1823 | -1.1465629 |            | "tags=19%, list=13%, signal=21%" |
| GSE4535_BM_DERIVED_DC_VS_FOLLICULAR_DC_DN                            |     |             |      |            |            |                                  |
| GSE4535_BM_DERIVED_DC_VS_FOLLICULAR_DC_DN                            |     |             |      |            |            |                                  |
| 0.27393943                                                           | 140 | -0.28125617 | 2589 | -1.1463345 | 0.19581749 | "tags=29%, list=18%, signal=35%" |
| GSE3039_CD4_TCELL_VS_B2_BCELL_UP                                     |     |             |      |            |            |                                  |
| GSE3039_CD4_TCELL_VS_B2_BCELL_UP                                     |     |             |      |            |            |                                  |
| 0.27385548                                                           | 144 | -0.2735605  | 2199 | -1.1462735 | 0.15601504 | "tags=24%, list=16%, signal=28%" |
| GSE40274_FOXP3_VS_FOXP3_AND_SATB1_TRANSDUCE                          |     |             |      |            |            |                                  |
| GSE40274_FOXP3_VS_FOXP3_AND_SATB1_TRANSDUCE                          |     |             |      |            |            |                                  |
| 0.2737807                                                            | 141 | -0.27869585 | 1455 | -1.1462098 | 0.1796875  | "tags=22%, list=10%, signal=24%" |
| GSE18791_UNSTIM_VS_NEWCATSLE_VIRUS_DC_2H_DN                          |     |             |      |            |            |                                  |
| GSE18791_UNSTIM_VS_NEWCATSLE_VIRUS_DC_2H_DN                          |     |             |      |            |            |                                  |
| 0.27419066                                                           | 100 | -0.29528967 | 3797 | -1.1459186 | 0.20527308 | "tags=35%, list=27%, signal=48%" |
| GSE25123_CTRL_VS_IL4_AND_ROSIGLITAZONE_STIM_PPARG_KO_MACROPHAGE_UP   |     |             |      |            |            |                                  |
| GSE25123_CTRL_VS_IL4_AND_ROSIGLITAZONE_STIM_PPARG_KO_MACROPHAGE_UP   |     |             |      |            |            |                                  |
| 0.27408758                                                           | 142 | -0.27894723 | 3270 | -1.1458749 | 0.16697589 | "tags=27%, list=23%, signal=35%" |
| GSE1925_CTRL_VS_24H_IFNG_STIM_MACROPHAGE_DN                          |     |             |      |            |            |                                  |
| GSE1925_CTRL_VS_24H_IFNG_STIM_MACROPHAGE_DN                          |     |             |      |            |            |                                  |
| 0.2750525                                                            | 133 | -0.27673274 | 1396 | -1.1453055 | 0.1880998  | "tags=20%, list=10%, signal=21%" |
| GSE43863_NAIVE_VS_MEMORY_TFH_CD4_TCELL_D150_LCMV_UP                  |     |             |      |            |            |                                  |
| GSE43863_NAIVE_VS_MEMORY_TFH_CD4_TCELL_D150_LCMV_UP                  |     |             |      |            |            |                                  |
| 0.2751547                                                            | 148 | -0.27505565 | 1865 | -1.1451548 | 0.17836812 | "tags=22%, list=13%, signal=25%" |

GSE22432\_MULTIPOTENT\_VS\_COMMON\_DC\_PROGENITOR\_DN  
GSE22432\_MULTIPOTENT\_VS\_COMMON\_DC\_PROGENITOR\_DN  
155 -0.27457723 -1.1450807 0.18164794  
0.27510232 1 1295 "tags=16%, list=9%, signal=18%"  
GSE24634\_IL4\_VS\_CTRL\_TREATED\_NAIVE\_CD4\_TCELL\_DAY7\_DN  
GSE24634\_IL4\_VS\_CTRL\_TREATED\_NAIVE\_CD4\_TCELL\_DAY7\_DN  
142 -0.28056616 -1.1446627 0.17877094  
0.27573094 1 1341 "tags=17%, list=10%, signal=18%"  
GSE369\_SOCS3\_KO\_VS\_WT\_LIVER\_POST\_IL6\_INJECTION\_DN  
GSE369\_SOCS3\_KO\_VS\_WT\_LIVER\_POST\_IL6\_INJECTION\_DN  
155 -0.27481467 -1.1440346 0.16446126  
0.27678505 1 1934 "tags=23%, list=14%, signal=27%"  
GSE14000\_UNSTIM\_VS\_4H\_LPS\_DC\_TRANSLATED\_RNA\_UP  
GSE14000\_UNSTIM\_VS\_4H\_LPS\_DC\_TRANSLATED\_RNA\_UP  
125 -0.2829895 -1.1439867 0.17293233  
0.27668554 1 1354 "tags=19%, list=10%, signal=21%"  
GSE36826\_WT\_VS\_IL1R\_KO\_SKIN\_STAPH\_AUREUS\_INF\_DN  
GSE36826\_WT\_VS\_IL1R\_KO\_SKIN\_STAPH\_AUREUS\_INF\_DN  
149 -0.27440616 -1.1435486 0.16981132  
0.27735502 1 1783 "tags=21%, list=13%, signal=24%"  
GSE18804\_SPLEEN\_MACROPHAGE\_VS\_TUMORAL\_MACROPHAGE\_UP  
GSE18804\_SPLEEN\_MACROPHAGE\_VS\_TUMORAL\_MACROPHAGE\_UP  
123 -0.2830653 -1.1434642 0.18074656  
0.27733937 1 1222 "tags=15%, list=9%, signal=17%"  
GSE2128\_CTRL\_VS\_MIMETOPE\_NEGATIVE\_SELECTION\_DP\_THYMOCYTE\_NOD\_UP  
GSE2128\_CTRL\_VS\_MIMETOPE\_NEGATIVE\_SELECTION\_DP\_THYMOCYTE\_NOD\_UP  
148 -0.27750954 -1.1433216 0.1906542  
0.27740213 1 1424 "tags=19%, list=10%, signal=21%"  
GSE11864\_CSF1\_VS\_CSF1\_PAM3CYS\_IN\_MAC\_UP  
GSE11864\_CSF1\_VS\_CSF1\_PAM3CYS\_IN\_MAC\_UP  
133 -0.28083602 -1.1433052 0.18395303  
0.2772344 1 1461 "tags=20%, list=10%, signal=22%"  
GSE36527\_CD62L\_HIGH\_CD69\_NEG\_VS\_CD62L\_LOW\_CD69\_POS\_TREG\_KLRG1\_NEG\_UP  
  
GSE36527\_CD62L\_HIGH\_CD69\_NEG\_VS\_CD62L\_LOW\_CD69\_POS\_TREG\_KLRG1\_NEG\_UP  
157 -0.2700611 -1.1427884  
0.17557251 0.27806726 1 2142 "tags=22%,  
list=15%, signal=25%"  
GSE3920\_IFNB\_VS\_IFNG\_TREATED\_ENDOTHELIAL\_CELL\_UP  
GSE3920\_IFNB\_VS\_IFNG\_TREATED\_ENDOTHELIAL\_CELL\_UP  
127 -0.2850801 -1.142217 0.19960861  
0.2790176 1 1462 "tags=20%, list=10%, signal=23%"  
GSE3982\_DC\_VS\_NEUTROPHIL\_DN GSE3982\_DC\_VS\_NEUTROPHIL\_DN  
134 -0.28182036 -1.1420531 0.19165085  
0.2791832 1 1621 "tags=19%, list=11%, signal=21%"  
GSE3982\_BASOPHIL\_VS\_CENT\_MEMORY\_CD4\_TCELL\_UP  
GSE3982\_BASOPHIL\_VS\_CENT\_MEMORY\_CD4\_TCELL\_UP  
139 -0.2792757 -1.1415836 0.18959108  
0.27994546 1 1445 "tags=17%, list=10%, signal=19%"  
GSE43955\_10H\_VS\_60H\_ACT\_CD4\_TCELL\_WITH\_TGFB\_IL6\_DN  
GSE43955\_10H\_VS\_60H\_ACT\_CD4\_TCELL\_WITH\_TGFB\_IL6\_DN  
165 -0.27086365 -1.1408209 0.19585687  
0.28133726 1 2553 "tags=25%, list=18%, signal=30%"  
GSE26488\_CTRL\_VS\_PEPTIDE\_INJECTION\_OT2\_THYMOCYTE\_DN



GSE26488\_CTRL\_VS\_PEPTIDE\_INJECTION\_OT2\_THYMOCYTE\_DN  
140 -0.27725527 -1.1405559 0.20229007  
0.28167754 1 1585 "tags=21%, list=11%, signal=23%"  
GSE34156\_UNTREATED\_VS\_6H\_TLR1\_TLR2\_LIGAND\_TREATED\_MONOCYTE\_DN  
GSE34156\_UNTREATED\_VS\_6H\_TLR1\_TLR2\_LIGAND\_TREATED\_MONOCYTE\_DN  
130 -0.2807025 -1.1404277 0.19850187  
0.2817416 1 1317 "tags=20%, list=9%, signal=22%"  
GSE22589\_HEALTHY\_VS\_HIV\_INFECTED\_DC\_DN  
GSE22589\_HEALTHY\_VS\_HIV\_INFECTED\_DC\_DN  
153 -0.27280375 -1.1403669 0.2 0.28167006  
1 2535 "tags=25%, list=18%, signal=30%"  
GSE25123\_CTRL\_VS\_ROSIGLITAZONE\_STIM\_PPARG\_KO\_MACROPHAGE\_DN  
GSE25123\_CTRL\_VS\_ROSIGLITAZONE\_STIM\_PPARG\_KO\_MACROPHAGE\_DN  
143 -0.27672756 -1.1402103 0.19075145  
0.28179437 1 1600 "tags=15%, list=11%, signal=17%"  
GSE25846\_IL10\_POS\_VS\_NEG\_CD8\_TCELL\_DAY7\_POST\_CORONAVIRUS\_BRAIN\_UP  
GSE25846\_IL10\_POS\_VS\_NEG\_CD8\_TCELL\_DAY7\_POST\_CORONAVIRUS\_BRAIN\_UP  
130 -0.27796432 -1.1389753 0.20113853  
0.28409708 1 3745 "tags=38%, list=27%, signal=51%"  
GSE557\_WT\_VS\_CIIITA\_KO\_DC\_UP GSE557\_WT\_VS\_CIIITA\_KO\_DC\_UP  
136 -0.27890432 -1.1389581 0.20073664  
0.2839313 1 2492 "tags=28%, list=18%, signal=34%"  
GSE17721\_LPS\_VS\_POLYIC\_2H\_BMDC\_UP GSE17721\_LPS\_VS\_POLYIC\_2H\_BMDC\_UP  
167 -0.27081063 -1.1389424 0.18045112  
0.28376275 1 2155 "tags=20%, list=15%, signal=23%"  
GSE3982\_MAST\_CELL\_VS\_BCELL\_DN GSE3982\_MAST\_CELL\_VS\_BCELL\_DN  
130 -0.28399396 -1.1389337 0.21031746  
0.28358096 1 3714 "tags=36%, list=26%, signal=49%"  
GSE39382\_IL3\_VS\_IL3\_IL33\_TREATED\_MAST\_CELL\_UP  
GSE39382\_IL3\_VS\_IL3\_IL33\_TREATED\_MAST\_CELL\_UP  
151 -0.2746229 -1.1385067 0.20306513  
0.28425342 1 1941 "tags=21%, list=14%, signal=24%"  
GSE22611\_MUTANT\_NOD2\_TRANSDUCED\_VS\_CTRL\_HEK293T\_STIMULATED\_WITH\_MDP\_6H\_DN  
GSE22611\_MUTANT\_NOD2\_TRANSDUCED\_VS\_CTRL\_HEK293T\_STIMULATED\_WITH\_MDP\_6H\_DN  
144 -0.27966326 -1.1382349  
0.18568665 0.28460637 1 2651 "tags=24%, list=19%, signal=29%"  
GSE35543\_IN\_VIVO\_NTREG\_VS\_IN\_VITRO\_ITREG\_DN  
GSE35543\_IN\_VIVO\_NTREG\_VS\_IN\_VITRO\_ITREG\_DN  
103 -0.2954092 -1.1372266 0.21290323  
0.28643593 1 2457 "tags=30%, list=17%, signal=36%"  
GSE18893\_TCONV\_VS\_TREG\_24H\_TNF\_STIM\_DN  
GSE18893\_TCONV\_VS\_TREG\_24H\_TNF\_STIM\_DN  
135 -0.27844775 -1.1370637 0.18582375  
0.2865554 1 2882 "tags=27%, list=20%, signal=34%"  
GSE29615\_CTRL\_VS\_DAY7\_LAIV\_FLU\_VACCINE\_PBMC\_DN  
GSE29615\_CTRL\_VS\_DAY7\_LAIV\_FLU\_VACCINE\_PBMC\_DN  
87 -0.29853258 -1.1370147 0.21441442  
0.28646666 1 3107 "tags=26%, list=22%, signal=34%"  
GSE28130\_ACTIVATED\_VS\_INDUCED\_TREG\_UP  
GSE28130\_ACTIVATED\_VS\_INDUCED\_TREG\_UP  
148 -0.27094242 -1.1366795 0.18106996  
0.2869342 1 1696 "tags=16%, list=12%, signal=17%"

GSE21063\_3H\_VS\_16H\_ANTI\_IGM\_STIM\_BCELL\_UP  
GSE21063\_3H\_VS\_16H\_ANTI\_IGM\_STIM\_BCELL\_UP  
147 -0.27515018 -1.1366417 0.19066148  
0.28680196 1 1285 "tags=16%, list=9%, signal=17%"  
GSE12366\_GC\_BCELL\_VS\_PLASMA\_CELL\_DN  
GSE12366\_GC\_BCELL\_VS\_PLASMA\_CELL\_DN  
129 -0.28122136 -1.1362233 0.22118959  
0.28745052 1 2443 "tags=24%, list=17%, signal=29%"  
GSE22140\_GERMFREE\_VS\_SPF\_MOUSE\_CD4\_TCELL\_UP  
GSE22140\_GERMFREE\_VS\_SPF\_MOUSE\_CD4\_TCELL\_UP  
148 -0.27469248 -1.1356239 0.19622642  
0.28846037 1 1766 "tags=20%, list=13%, signal=22%"  
GSE3982\_MAC\_VS\_BCELL\_DN GSE3982\_MAC\_VS\_BCELL\_DN  
124 -0.28607804 -1.1353081 0.19662921  
0.28895137 1 3611 "tags=31%, list=26%, signal=42%"  
GSE32034\_LY6C\_HIGH\_VS\_LOW\_ROSIGLIZATONE\_TREATED\_MONOCYTE\_DN  
GSE32034\_LY6C\_HIGH\_VS\_LOW\_ROSIGLIZATONE\_TREATED\_MONOCYTE\_DN  
159 -0.2675929 -1.1350352 0.18290259  
0.28935096 1 906 "tags=13%, list=6%, signal=14%"  
GSE37533\_UNTREATED\_VS\_PIOGLIZATONE\_TREATED\_CD4\_TCELL\_PPARG1\_AND\_FOXP  
3\_TRASDUCED\_UP  
GSE37533\_UNTREATED\_VS\_PIOGLIZATONE\_TREATED\_CD4\_TCELL\_PPARG1\_AND\_FOXP  
3\_TRASDUCED\_UP 151 -0.27508304 -1.1347321  
0.19886364 0.28977945 1 1770 "tags=26%,  
list=13%, signal=29%"  
GSE13762\_CTRL\_VS\_125\_VITAMIND\_DAY5\_DC\_DN  
GSE13762\_CTRL\_VS\_125\_VITAMIND\_DAY5\_DC\_DN  
106 -0.28589788 -1.1342335 0.20670392  
0.2906193 1 4981 "tags=41%, list=35%, signal=62%"  
GSE17721\_LPS\_VS\_PAM3CSK4\_0.5H\_BMDC\_DN  
GSE17721\_LPS\_VS\_PAM3CSK4\_0.5H\_BMDC\_DN  
149 -0.27356625 -1.1338805 0.20992367  
0.29114622 1 2050 "tags=20%, list=15%, signal=23%"  
GSE2706\_UNSTIM\_VS\_2H\_LPS\_DC\_UP GSE2706\_UNSTIM\_VS\_2H\_LPS\_DC\_UP  
79 -0.30447373 -1.1338497 0.23818526  
0.29101452 1 3639 "tags=43%, list=26%, signal=58%"  
GSE28737\_BCL6\_HET\_VS\_BCL6\_KO\_FOLLICULAR\_BCELL\_UP  
GSE28737\_BCL6\_HET\_VS\_BCL6\_KO\_FOLLICULAR\_BCELL\_UP  
140 -0.27644113 -1.1337547 0.21839081  
0.29101342 1 1101 "tags=15%, list=8%, signal=16%"  
GSE20198\_UNTREATED\_VS\_IL12\_IL18\_TREATED\_ACT\_CD4\_TCELL\_DN  
GSE20198\_UNTREATED\_VS\_IL12\_IL18\_TREATED\_ACT\_CD4\_TCELL\_DN  
141 -0.2773349 -1.1337475 0.19924812  
0.29082772 1 1747 "tags=21%, list=12%, signal=23%"  
GSE19888\_ADENOSINE\_A3R\_INH\_VS\_INH\_PRETREAT\_AND\_ACT\_WITH\_TCELL\_MEMBRA  
NES\_MAST\_CELL\_DN  
GSE19888\_ADENOSINE\_A3R\_INH\_VS\_INH\_PRETREAT\_AND\_ACT\_WITH\_TCELL\_MEMBRA  
NES\_MAST\_CELL\_DN 137 -0.27697065 -1.1332389  
0.21637426 0.29163674 1 1571 "tags=14%,  
list=11%, signal=15%"  
GSE42088\_UNINF\_VS\_LEISHMANIA\_INF\_DC\_8H\_UP  
GSE42088\_UNINF\_VS\_LEISHMANIA\_INF\_DC\_8H\_UP  
139 -0.27412355 -1.1330603 0.1821632  
0.29179227 1 2087 "tags=24%, list=15%, signal=28%"

GSE32164\_RESTING\_DIFFERENTIATED\_VS\_CMYC\_INHIBITED\_MACROPHAGE\_UP  
GSE32164\_RESTING\_DIFFERENTIATED\_VS\_CMYC\_INHIBITED\_MACROPHAGE\_UP  
163 -0.27252045 -1.1328096 0.20703125  
0.29210493 1 2570 "tags=25%, list=18%, signal=30%"  
GSE21670\_UNTREATED\_VS\_TGFB\_TREATED\_STAT3\_KO\_CD4\_TCELL\_DN  
GSE21670\_UNTREATED\_VS\_TGFB\_TREATED\_STAT3\_KO\_CD4\_TCELL\_DN  
156 -0.27111575 -1.1327477 0.19460501  
0.29202285 1 1841 "tags=22%, list=13%, signal=26%"  
GSE22935\_24H\_VS\_48H\_MBOVIS\_BCG\_STIM\_MYD88\_KO\_MACROPHAGE\_DN  
GSE22935\_24H\_VS\_48H\_MBOVIS\_BCG\_STIM\_MYD88\_KO\_MACROPHAGE\_DN  
137 -0.27897948 -1.1321907 0.1852552  
0.2930051 1 3604 "tags=31%, list=26%, signal=42%"  
GSE3720\_LPS\_VS\_PMA\_STIM\_VD2\_GAMMADELTA\_TCELL\_UP  
GSE3720\_LPS\_VS\_PMA\_STIM\_VD2\_GAMMADELTA\_TCELL\_UP  
102 -0.28602663 -1.1321863 0.20883535  
0.29281408 1 2848 "tags=31%, list=20%, signal=39%"  
GSE7509\_DC\_VS\_MONOCYTE\_WITH\_FCGR1IB\_STIM\_UP  
GSE7509\_DC\_VS\_MONOCYTE\_WITH\_FCGR1IB\_STIM\_UP  
152 -0.27017337 -1.131312 0.188 0.29446313  
1 1507 "tags=19%, list=11%, signal=21%"  
GSE26290\_CTRL\_VS\_AKT\_INHIBITOR\_TREATED\_ANTI\_CD3\_AND\_IL2\_STIM\_CD8\_TCELL\_DN  
GSE26290\_CTRL\_VS\_AKT\_INHIBITOR\_TREATED\_ANTI\_CD3\_AND\_IL2\_STIM\_CD8\_TCELL\_DN  
149 -0.27180332 -1.131112  
0.2043222 0.29467395 1 2217 "tags=23%, list=16%, signal=28%"  
GSE29949\_MICROGLIA\_BRAIN\_VS\_MONOCYTE\_BONE\_MARROW\_UP  
GSE29949\_MICROGLIA\_BRAIN\_VS\_MONOCYTE\_BONE\_MARROW\_UP  
148 -0.27379102 -1.1309351 0.18450184  
0.29486004 1 2290 "tags=19%, list=16%, signal=22%"  
GSE8835\_HEALTHY\_VS\_CLL\_CD8\_TCELL\_DN  
GSE8835\_HEALTHY\_VS\_CLL\_CD8\_TCELL\_DN  
146 -0.27780282 -1.1307638 0.19805825  
0.29500312 1 2073 "tags=20%, list=15%, signal=23%"  
GSE46606\_IRF4HIGH\_VS\_WT\_CD40L\_IL2\_IL5\_DAY1\_STIMULATED\_BCELL\_UP  
GSE46606\_IRF4HIGH\_VS\_WT\_CD40L\_IL2\_IL5\_DAY1\_STIMULATED\_BCELL\_UP  
138 -0.28022823 -1.1293381 0.20696326  
0.2977367 1 1471 "tags=20%, list=10%, signal=22%"  
GSE5589\_LPS\_VS\_LPS\_AND\_IL6\_STIM\_IL6\_KO\_MACROPHAGE\_45MIN\_UP  
GSE5589\_LPS\_VS\_LPS\_AND\_IL6\_STIM\_IL6\_KO\_MACROPHAGE\_45MIN\_UP  
156 -0.27258804 -1.1285337 0.18538325  
0.29919347 1 1540 "tags=19%, list=11%, signal=21%"  
GSE36888\_UNTREATED\_VS\_IL2\_TREATED\_STAT5\_AB\_KNOCKIN\_TCELL\_2H\_DN  
GSE36888\_UNTREATED\_VS\_IL2\_TREATED\_STAT5\_AB\_KNOCKIN\_TCELL\_2H\_DN  
136 -0.2774205 -1.1281893 0.20245399  
0.29968432 1 1927 "tags=22%, list=14%, signal=25%"  
GSE29618\_BCELL\_VS\_MDC\_DAY7\_FLU\_VACCINE\_UP  
GSE29618\_BCELL\_VS\_MDC\_DAY7\_FLU\_VACCINE\_UP  
125 -0.28024346 -1.1281393 0.212 0.29959968  
1 2081 "tags=20%, list=15%, signal=23%"  
GSE1432\_1H\_VS\_24H\_IFNG\_MICROGLIA\_UP  
GSE1432\_1H\_VS\_24H\_IFNG\_MICROGLIA\_UP  
162 -0.27220473 -1.1263716 0.20736434  
0.30309737 1 1523 "tags=17%, list=11%, signal=19%"

GSE17721\_12H\_VS\_24H\_LPS\_BMDC\_UP      GSE17721\_12H\_VS\_24H\_LPS\_BMDC\_UP  
161      -0.26792917      -1.1259265      0.1961165  
0.30384806      1      2108      "tags=22%, list=15%, signal=25%"  
GSE29618\_PRE\_VS\_DAY7\_POST\_TIV\_FLU\_VACCINE\_MONOCYTE\_DN  
GSE29618\_PRE\_VS\_DAY7\_POST\_TIV\_FLU\_VACCINE\_MONOCYTE\_DN  
136      -0.27435806      -1.1258281      0.22072937  
0.30385256      1      1961      "tags=20%, list=14%, signal=23%"  
GSE37533\_UNTREATED\_VS\_PIOGLIZATONE\_TREATED\_CD4\_TCELL\_PPARG2\_AND\_FOXP  
3\_TRASDUCED\_DN  
GSE37533\_UNTREATED\_VS\_PIOGLIZATONE\_TREATED\_CD4\_TCELL\_PPARG2\_AND\_FOXP  
3\_TRASDUCED\_DN      123      -0.27839023      -1.1258273  
0.22868218      0.30364832      1      1331      "tags=20%,  
list=9%, signal=21%"  
GSE8515\_CTRL\_VS\_IL6\_4H\_STIM\_MAC\_UP  
GSE8515\_CTRL\_VS\_IL6\_4H\_STIM\_MAC\_UP  
129      -0.27537996      -1.1256602      0.19736843  
0.3038002      1      1139      "tags=16%, list=8%, signal=17%"  
GSE34156\_NOD2\_LIGAND\_VS\_NOD2\_AND\_TLR1\_TLR2\_LIGAND\_6H\_TREATED\_MONOCYT  
E\_UP  
GSE34156\_NOD2\_LIGAND\_VS\_NOD2\_AND\_TLR1\_TLR2\_LIGAND\_6H\_TREATED\_MONOCYT  
E\_UP      113      -0.28299528      -1.1250248  
0.2259887      0.3049536      1      2368      "tags=25%,  
list=17%, signal=30%"  
GSE28783\_ANTI\_MIR33\_VS\_UNTREATED\_ATHEROSCLEROSIS\_MACROPHAGE\_DN  
GSE28783\_ANTI\_MIR33\_VS\_UNTREATED\_ATHEROSCLEROSIS\_MACROPHAGE\_DN  
135      -0.27390066      -1.1243539      0.20272905  
0.30615094      1      1878      "tags=16%, list=13%, signal=19%"  
GSE14308\_TH1\_VS\_INDUCED\_TREG\_UP      GSE14308\_TH1\_VS\_INDUCED\_TREG\_UP  
139      -0.27488866      -1.123908      0.22846442  
0.3069617      1      1251      "tags=17%, list=9%, signal=18%"  
GSE28237\_EARLY\_VS\_LATE\_GC\_BCELL\_UP  
GSE28237\_EARLY\_VS\_LATE\_GC\_BCELL\_UP  
138      -0.2739144      -1.1234972      0.20643939  
0.30763164      1      3736      "tags=26%, list=26%, signal=35%"  
GSE18281\_SUBCAPSULAR\_VS\_CENTRAL\_CORTICAL\_REGION\_OF\_THYMUS\_DN  
GSE18281\_SUBCAPSULAR\_VS\_CENTRAL\_CORTICAL\_REGION\_OF\_THYMUS\_DN  
157      -0.2699049      -1.1231811      0.21553399  
0.30810127      1      1776      "tags=24%, list=13%, signal=27%"  
GSE41176\_UNSTIM\_VS\_ANTI\_IGM\_STIM\_BCELL\_3H\_DN  
GSE41176\_UNSTIM\_VS\_ANTI\_IGM\_STIM\_BCELL\_3H\_DN  
134      -0.27517033      -1.1231302      0.23300971  
0.30800498      1      1616      "tags=20%, list=11%, signal=23%"  
GSE34205\_HEALTHY\_VS\_RSV\_INF\_INFANT\_PBMC\_UP  
GSE34205\_HEALTHY\_VS\_RSV\_INF\_INFANT\_PBMC\_UP  
111      -0.28144562      -1.1226968      0.23175183  
0.3087753      1      2033      "tags=20%, list=14%, signal=23%"  
GSE22611\_NOD2\_TRANSD\_VS\_CTRL\_TRANSD\_HEK293\_MDP\_STIM\_6H\_DN  
GSE22611\_NOD2\_TRANSD\_VS\_CTRL\_TRANSD\_HEK293\_MDP\_STIM\_6H\_DN  
134      -0.27696702      -1.1224673      0.21904762  
0.30904344      1      2132      "tags=19%, list=15%, signal=23%"  
GSE32034\_UNTREATED\_VS\_ROSIGLIZATONE\_TREATED\_LY6C\_HIGH\_MONOCYTE\_UP  
GSE32034\_UNTREATED\_VS\_ROSIGLIZATONE\_TREATED\_LY6C\_HIGH\_MONOCYTE\_UP  
156      -0.26926583      -1.1217287      0.21001926  
0.31039777      1      1840      "tags=21%, list=13%, signal=23%"

GSE17974\_IL4\_AND\_ANTI\_IL12\_VS\_UNTREATED\_4H\_ACT\_CD4\_TCELL\_DN  
GSE17974\_IL4\_AND\_ANTI\_IL12\_VS\_UNTREATED\_4H\_ACT\_CD4\_TCELL\_DN  
101 -0.29000595 -1.1216261 0.23333333  
0.31041634 1 4495 "tags=40%, list=32%, signal=58%"  
GSE17721\_LPS\_VS\_POLYIC\_6H\_BMDC\_UP GSE17721\_LPS\_VS\_POLYIC\_6H\_BMDC\_UP  
146 -0.2716769 -1.1211935 0.20641282  
0.31112674 1 898 "tags=14%, list=6%, signal=14%"  
GSE23925\_DARK\_ZONE\_VS\_NAIVE\_BCELL\_UP  
GSE23925\_DARK\_ZONE\_VS\_NAIVE\_BCELL\_UP  
145 -0.27152482 -1.1211326 0.22789784  
0.31105602 1 1207 "tags=17%, list=9%, signal=18%"  
GSE2128\_CTRL\_VS\_MIMETOPE\_NEGATIVE\_SELECTION\_DP\_THYMOCYTE\_C57BL6\_UP  
GSE2128\_CTRL\_VS\_MIMETOPE\_NEGATIVE\_SELECTION\_DP\_THYMOCYTE\_C57BL6\_UP  
125 -0.27757394 -1.120437 0.23062016  
0.31232145 1 1895 "tags=24%, list=13%, signal=27%"  
GSE360\_L\_MAJOR\_VS\_B\_MALAYI\_HIGH\_DOSE\_MAC\_UP  
GSE360\_L\_MAJOR\_VS\_B\_MALAYI\_HIGH\_DOSE\_MAC\_UP  
144 -0.2715149 -1.119924 0.21346153  
0.3132651 1 2554 "tags=23%, list=18%, signal=28%"  
GSE33162\_HDAC3\_KO\_VS\_HDAC3\_KO\_MACROPHAGE\_UP  
GSE33162\_HDAC3\_KO\_VS\_HDAC3\_KO\_MACROPHAGE\_UP  
142 -0.272211 -1.1198344 0.21541502  
0.3132425 1 2407 "tags=25%, list=17%, signal=29%"  
GSE41978\_WT\_VS\_ID2\_KO\_KLRG1\_LOW\_EFFECTOR\_CD8\_TCELL\_DN  
GSE41978\_WT\_VS\_ID2\_KO\_KLRG1\_LOW\_EFFECTOR\_CD8\_TCELL\_DN  
164 -0.26539674 -1.1196116 0.1920792  
0.31352285 1 4011 "tags=33%, list=28%, signal=45%"  
GSE17721\_LPS\_VS\_CPG\_12H\_BMDC\_UP GSE17721\_LPS\_VS\_CPG\_12H\_BMDC\_UP  
161 -0.2659761 -1.1189872 0.20864661  
0.31466565 1 1766 "tags=20%, list=13%, signal=22%"  
GSE19888\_ADENOSINE\_A3R\_ACT\_VS\_A3R\_ACT\_WITH\_A3R\_INH\_PRETREATMENT\_IN\_M  
AST\_CELL\_DN  
GSE19888\_ADENOSINE\_A3R\_ACT\_VS\_A3R\_ACT\_WITH\_A3R\_INH\_PRETREATMENT\_IN\_M  
AST\_CELL\_DN  
141 -0.27233738 -1.1187764  
0.23846154 0.31492275 1 1879 "tags=19%,  
list=13%, signal=22%"  
GSE16385\_ROSIGLITAZONE\_IL4\_VS\_IL4\_ALONE\_STIM\_MACROPHAGE\_12H\_UP  
GSE16385\_ROSIGLITAZONE\_IL4\_VS\_IL4\_ALONE\_STIM\_MACROPHAGE\_12H\_UP  
146 -0.26812208 -1.118761 0.21121496  
0.31474203 1 1100 "tags=15%, list=8%, signal=16%"  
GSE3720\_LPS\_VS\_PMA\_STIM\_VD1\_GAMMADELTA\_TCELL\_UP  
GSE3720\_LPS\_VS\_PMA\_STIM\_VD1\_GAMMADELTA\_TCELL\_UP  
95 -0.29120645 -1.1185707 0.22990654  
0.3149557 1 1527 "tags=19%, list=11%, signal=21%"  
GSE6269\_FLU\_VS\_STAPH\_AUREUS\_INF\_PBMC\_UP  
GSE6269\_FLU\_VS\_STAPH\_AUREUS\_INF\_PBMC\_UP  
122 -0.2753497 -1.1182641 0.22490707  
0.3154091 1 1174 "tags=16%, list=8%, signal=17%"  
GSE46606\_IRF4MID\_VS\_WT\_CD40L\_IL2\_IL5\_DAY1\_STIMULATED\_BCELL\_UP  
GSE46606\_IRF4MID\_VS\_WT\_CD40L\_IL2\_IL5\_DAY1\_STIMULATED\_BCELL\_UP  
141 -0.26788214 -1.1180276 0.21252371  
0.31571254 1 2304 "tags=26%, list=16%, signal=31%"  
GSE3982\_EFF\_MEMORY\_CD4\_TCELL\_VS\_TH2\_UP  
GSE3982\_EFF\_MEMORY\_CD4\_TCELL\_VS\_TH2\_UP

129 -0.27671295 -1.1174567 0.22686026  
0.3167093 1 1010 "tags=9%, list=7%, signal=10%"  
GSE2706\_LPS\_VS\_R848\_AND\_LPS\_8H\_STIM\_DC\_DN  
GSE2706\_LPS\_VS\_R848\_AND\_LPS\_8H\_STIM\_DC\_DN  
124 -0.27824834 -1.1174383 0.2193676  
0.3165386 1 2019 "tags=19%, list=14%, signal=22%"  
GSE21380\_NON\_TFH\_VS\_GERMINAL\_CENTER\_TFH\_CD4\_TCELL\_DN  
GSE21380\_NON\_TFH\_VS\_GERMINAL\_CENTER\_TFH\_CD4\_TCELL\_DN  
142 -0.27044106 -1.1168938 0.21194606  
0.31750506 1 1483 "tags=19%, list=11%, signal=21%"  
GSE19401\_PAM2CSK4\_VS\_RETINOIC\_ACID\_STIM\_FOLLICULAR\_DC\_DN  
GSE19401\_PAM2CSK4\_VS\_RETINOIC\_ACID\_STIM\_FOLLICULAR\_DC\_DN  
142 -0.27207378 -1.116542 0.21663442  
0.31805798 1 2534 "tags=22%, list=18%, signal=26%"  
GSE19941\_IL10\_KO\_VS\_IL10\_KO\_AND\_NFKBP50\_KO\_UNSTIM\_MACROPHAGE\_DN  
GSE19941\_IL10\_KO\_VS\_IL10\_KO\_AND\_NFKBP50\_KO\_UNSTIM\_MACROPHAGE\_DN  
155 -0.26738846 -1.1163875 0.2077206  
0.31817505 1 2366 "tags=23%, list=17%, signal=27%"  
GSE9509\_LPS\_VS\_LPS\_AND\_IL10\_STIM\_IL10\_KO\_MACROPHAGE\_30MIN\_UP  
GSE9509\_LPS\_VS\_LPS\_AND\_IL10\_STIM\_IL10\_KO\_MACROPHAGE\_30MIN\_UP  
136 -0.27452278 -1.1159198 0.22612086  
0.318998 1 1357 "tags=18%, list=10%, signal=19%"  
GSE39820\_CTRL\_VS\_IL1B\_IL6\_IL23A\_CD4\_TCELL\_DN  
GSE39820\_CTRL\_VS\_IL1B\_IL6\_IL23A\_CD4\_TCELL\_DN  
153 -0.26946256 -1.1150453 0.22814499  
0.32075307 1 1783 "tags=18%, list=13%, signal=21%"  
GSE21774\_CD62L\_POS\_CD56\_BRIGHT\_VS\_CD62L\_NEG\_CD56\_DIM\_NK\_CELL\_UP  
GSE21774\_CD62L\_POS\_CD56\_BRIGHT\_VS\_CD62L\_NEG\_CD56\_DIM\_NK\_CELL\_UP  
148 -0.27603337 -1.1148205 0.21387284  
0.3210587 1 1885 "tags=21%, list=13%, signal=24%"  
GSE3982\_EOSINOPHIL\_VS\_BASOPHIL\_UP GSE3982\_EOSINOPHIL\_VS\_BASOPHIL\_UP  
140 -0.2739172 -1.1145871 0.23020259  
0.32133222 1 2625 "tags=27%, list=19%, signal=33%"  
GSE18791\_UNSTIM\_VS\_NEWCATSLE\_VIRUS\_DC\_6H\_DN  
GSE18791\_UNSTIM\_VS\_NEWCATSLE\_VIRUS\_DC\_6H\_DN  
116 -0.2785619 -1.1140336 0.21375465  
0.3223613 1 1766 "tags=22%, list=13%, signal=24%"  
GSE41867\_MEMORY\_VS\_EXHAUSTED\_CD8\_TCELL\_DAY30\_LCMV\_UP  
GSE41867\_MEMORY\_VS\_EXHAUSTED\_CD8\_TCELL\_DAY30\_LCMV\_UP  
144 -0.27229843 -1.1139839 0.22287968  
0.32226676 1 1934 "tags=22%, list=14%, signal=25%"  
GSE11961\_MARGINAL\_ZONE\_BCELL\_VS\_MEMORY\_BCELL\_DAY7\_DN  
GSE11961\_MARGINAL\_ZONE\_BCELL\_VS\_MEMORY\_BCELL\_DAY7\_DN  
142 -0.27050674 -1.1134232 0.2394636  
0.32332125 1 5825 "tags=48%, list=41%, signal=81%"  
GSE22501\_PERIPHERAL\_BLOOD\_VS\_CORD\_BLOOD\_TREG\_UP  
GSE22501\_PERIPHERAL\_BLOOD\_VS\_CORD\_BLOOD\_TREG\_UP  
151 -0.27033144 -1.1133375 0.22884615  
0.32330894 1 2758 "tags=20%, list=20%, signal=24%"  
GSE21678\_WT\_VS\_FOXO1\_FOXO3\_KO\_TREG\_UP  
GSE21678\_WT\_VS\_FOXO1\_FOXO3\_KO\_TREG\_UP  
126 -0.27851486 -1.1130089 0.22332016  
0.32386455 1 1484 "tags=21%, list=11%, signal=23%"  
GSE15750\_WT\_VS\_TRAF6KO\_DAY6\_EFF\_CD8\_TCELL\_DN

GSE15750\_WT\_VS\_TRAF6KO\_DAY6\_EFF\_CD8\_TCELL\_DN  
135 -0.27109402 -1.1129925 0.20729366  
0.3236878 1 3174 "tags=23%, list=22%, signal=29%"  
GSE21670\_STAT3\_KO\_VS\_WT\_CD4\_TCELL\_UP  
GSE21670\_STAT3\_KO\_VS\_WT\_CD4\_TCELL\_UP  
137 -0.26823142 -1.1115326 0.20898438  
0.32664534 1 2377 "tags=22%, list=17%, signal=26%"  
GSE21546\_ELK1\_KO\_VS\_SAP1A\_KO\_AND\_ELK1\_KO\_DP\_THYMOCYTES\_UP  
GSE21546\_ELK1\_KO\_VS\_SAP1A\_KO\_AND\_ELK1\_KO\_DP\_THYMOCYTES\_UP  
108 -0.2808647 -1.111479 0.24723247  
0.32654878 1 1766 "tags=21%, list=13%, signal=24%"  
GSE32533\_WT\_VS\_MIR17\_OVEREXPRESS\_ACT\_CD4\_TCELL\_DN  
GSE32533\_WT\_VS\_MIR17\_OVEREXPRESS\_ACT\_CD4\_TCELL\_DN  
149 -0.26866257 -1.1113318 0.2401501  
0.32664743 1 3523 "tags=28%, list=25%, signal=37%"  
GSE26030\_TH1\_VS\_TH17\_DAY15\_POST\_POLARIZATION\_UP  
GSE26030\_TH1\_VS\_TH17\_DAY15\_POST\_POLARIZATION\_UP  
139 -0.27128163 -1.1112967 0.22393823  
0.32650492 1 1965 "tags=21%, list=14%, signal=24%"  
GSE14769\_20MIN\_VS\_360MIN\_LPS\_BMDM\_DN  
GSE14769\_20MIN\_VS\_360MIN\_LPS\_BMDM\_DN  
145 -0.26917994 -1.1112202 0.2278481  
0.3264537 1 2021 "tags=21%, list=14%, signal=24%"  
GSE16385\_UNTREATED\_VS\_12H\_ROSIGLITAZONE\_IFNG\_TNF\_TREATED\_MACROPHAGE\_DN  
GSE16385\_UNTREATED\_VS\_12H\_ROSIGLITAZONE\_IFNG\_TNF\_TREATED\_MACROPHAGE\_DN  
129 -0.27439815 -1.1111685  
0.22972973 0.32635334 1 1842 "tags=20%,  
list=13%, signal=23%"  
GSE32423\_IL7\_VS\_IL7\_IL4\_NAIVE\_CD8\_TCELL\_UP  
GSE32423\_IL7\_VS\_IL7\_IL4\_NAIVE\_CD8\_TCELL\_UP  
146 -0.26665086 -1.1110975 0.22033899  
0.3262967 1 3420 "tags=33%, list=24%, signal=43%"  
GSE42724\_NAIVE\_VS\_B1\_BCELL\_UP GSE42724\_NAIVE\_VS\_B1\_BCELL\_UP  
144 -0.27339932 -1.1108856 0.22678572  
0.3265334 1 2282 "tags=17%, list=16%, signal=20%"  
GSE36476\_CTRL\_VS\_TSST\_ACT\_16H\_MEMORY\_CD4\_TCELL\_YOUNG\_UP  
GSE36476\_CTRL\_VS\_TSST\_ACT\_16H\_MEMORY\_CD4\_TCELL\_YOUNG\_UP  
138 -0.26883045 -1.1102095 0.23747681  
0.3277964 1 1736 "tags=21%, list=12%, signal=24%"  
GSE8921\_UNSTIM\_0H\_VS\_TLR1\_2\_STIM\_MONOCYTE\_3H\_DN  
GSE8921\_UNSTIM\_0H\_VS\_TLR1\_2\_STIM\_MONOCYTE\_3H\_DN  
138 -0.26897505 -1.110155 0.22574627  
0.32771155 1 4918 "tags=36%, list=35%, signal=55%"  
GSE15324\_NAIVE\_VS\_ACTIVATED\_CD8\_TCELL\_DN  
GSE15324\_NAIVE\_VS\_ACTIVATED\_CD8\_TCELL\_DN  
159 -0.2676518 -1.1099489 0.2112676  
0.32795683 1 686 "tags=10%, list=5%, signal=10%"  
GSE2585\_CTEC\_VS\_THYMIC\_MACROPHAGE\_UP  
GSE2585\_CTEC\_VS\_THYMIC\_MACROPHAGE\_UP  
142 -0.2697774 -1.1099249 0.23339659  
0.32779485 1 2073 "tags=20%, list=15%, signal=23%"  
GSE13485\_DAY3\_VS\_DAY21\_YF17D\_VACCINE\_PBMC\_UP  
GSE13485\_DAY3\_VS\_DAY21\_YF17D\_VACCINE\_PBMC\_UP

126 -0.27556226 -1.1094333 0.23731884  
0.32865328 1 1872 "tags=22%, list=13%, signal=25%"  
GSE43955\_1H\_VS\_10H\_ACT\_CD4\_TCELL\_WITH\_TGFB\_IL6\_DN  
GSE43955\_1H\_VS\_10H\_ACT\_CD4\_TCELL\_WITH\_TGFB\_IL6\_DN  
156 -0.26769924 -1.108621 0.22348484  
0.33019468 1 2151 "tags=23%, list=15%, signal=27%"  
GSE1460\_INTRATHYMIC\_T\_PROGENITOR\_VS\_NAIVE\_CD4\_TCELL\_ADULT\_BLOOD\_DN  
GSE1460\_INTRATHYMIC\_T\_PROGENITOR\_VS\_NAIVE\_CD4\_TCELL\_ADULT\_BLOOD\_DN  
140 -0.27334023 -1.108317 0.23863636  
0.33066133 1 2156 "tags=21%, list=15%, signal=25%"  
GSE20715\_0H\_VS\_6H\_OZONE\_TLR4\_KO\_LUNG\_DN  
GSE20715\_0H\_VS\_6H\_OZONE\_TLR4\_KO\_LUNG\_DN  
154 -0.26364225 -1.1075909 0.23505977  
0.3320371 1 1839 "tags=17%, list=13%, signal=19%"  
GSE5589\_WT\_VS\_IL6\_KO\_LPS\_AND\_IL6\_STIM\_MACROPHAGE\_45MIN\_DN  
GSE5589\_WT\_VS\_IL6\_KO\_LPS\_AND\_IL6\_STIM\_MACROPHAGE\_45MIN\_DN  
154 -0.26613355 -1.1074216 0.23031496  
0.33222055 1 3523 "tags=29%, list=25%, signal=38%"  
GSE360\_DC\_VS\_MAC\_T\_GONDII\_DN GSE360\_DC\_VS\_MAC\_T\_GONDII\_DN  
151 -0.26710725 -1.1072564 0.22200392  
0.3323599 1 1929 "tags=18%, list=14%, signal=20%"  
GSE15624\_3H\_VS\_6H\_HALOFUGINONE\_TREATED\_CD4\_TCELL\_DN  
GSE15624\_3H\_VS\_6H\_HALOFUGINONE\_TREATED\_CD4\_TCELL\_DN  
116 -0.27405307 -1.1069657 0.243083 0.33277223  
1 1740 "tags=22%, list=12%, signal=24%"  
GSE13411\_NAIVE\_VS\_SWITCHED\_MEMORY\_BCELL\_UP  
GSE13411\_NAIVE\_VS\_SWITCHED\_MEMORY\_BCELL\_UP  
140 -0.2717879 -1.1063371 0.2647619  
0.3339608 1 4827 "tags=41%, list=34%, signal=62%"  
GSE45382\_UNTREATED\_VS\_TGFB\_TREATED\_MACROPHAGES\_DN  
GSE45382\_UNTREATED\_VS\_TGFB\_TREATED\_MACROPHAGES\_DN  
130 -0.27236912 -1.1063087 0.25045705  
0.33380628 1 2248 "tags=27%, list=16%, signal=32%"  
GSE22025\_PROGESTERONE\_VS\_TGFB1\_AND\_PROGESTERONE\_TREATED\_CD4\_TCELL\_DN  
  
GSE22025\_PROGESTERONE\_VS\_TGFB1\_AND\_PROGESTERONE\_TREATED\_CD4\_TCELL\_DN  
142 -0.269834 -1.1058898 0.251938  
0.33457005 1 1913 "tags=20%, list=14%, signal=23%"  
GSE26030\_UNSTIM\_VS\_RESTIM\_TH1\_DAY15\_POST\_POLARIZATION\_UP  
GSE26030\_UNSTIM\_VS\_RESTIM\_TH1\_DAY15\_POST\_POLARIZATION\_UP  
157 -0.26261476 -1.1056509 0.20512821  
0.3349135 1 1089 "tags=14%, list=8%, signal=15%"  
GSE41978\_KLRG1\_HIGH\_VS\_LOW\_EFFECTOR\_CD8\_TCELL\_UP  
GSE41978\_KLRG1\_HIGH\_VS\_LOW\_EFFECTOR\_CD8\_TCELL\_UP  
165 -0.26372093 -1.1056461 0.23647295  
0.33470437 1 4239 "tags=35%, list=30%, signal=50%"  
GSE29949\_CD8\_NEG\_DC\_SPLEEN\_VS\_MONOCYTE\_BONE\_MARROW\_DN  
GSE29949\_CD8\_NEG\_DC\_SPLEEN\_VS\_MONOCYTE\_BONE\_MARROW\_DN  
148 -0.27061883 -1.1054627 0.2523719  
0.33490875 1 2424 "tags=21%, list=17%, signal=25%"  
GSE20198\_IL12\_VS\_IL12\_IL18\_TREATED\_ACT\_CD4\_TCELL\_DN  
GSE20198\_IL12\_VS\_IL12\_IL18\_TREATED\_ACT\_CD4\_TCELL\_DN  
150 -0.26767257 -1.105291 0.23722628  
0.3350606 1 1487 "tags=20%, list=11%, signal=22%"



GSE2706\_UNSTIM\_VS\_2H\_LPS\_AND\_R848\_DC\_UP  
GSE2706\_UNSTIM\_VS\_2H\_LPS\_AND\_R848\_DC\_UP  
95 -0.28147414 -1.1049243 0.26901668  
0.3356463 1 1721 "tags=23%, list=12%, signal=26%"  
GSE27786\_NKCELL\_VS\_ERYTHROBLAST\_UP  
GSE27786\_NKCELL\_VS\_ERYTHROBLAST\_UP  
140 -0.271167 -1.1047777 0.26325756  
0.3357682 1 1821 "tags=18%, list=13%, signal=20%"  
GSE28783\_ANTI\_MIR33\_VS\_CTRL\_ATHEROSCLEROSIS\_MACROPHAGE\_UP  
GSE28783\_ANTI\_MIR33\_VS\_CTRL\_ATHEROSCLEROSIS\_MACROPHAGE\_UP  
147 -0.266348 -1.1039455 0.23781677  
0.33742213 1 3175 "tags=28%, list=22%, signal=36%"  
GSE24634\_TREG\_VS\_TCONV\_POST\_DAY10\_IL4\_CONVERSION\_DN  
GSE24634\_TREG\_VS\_TCONV\_POST\_DAY10\_IL4\_CONVERSION\_DN  
152 -0.2664854 -1.1039104 0.22463769  
0.33727887 1 2111 "tags=21%, list=15%, signal=24%"  
GSE17721\_POLYIC\_VS\_PAM3CSK4\_0.5H\_BMDC\_DN  
GSE17721\_POLYIC\_VS\_PAM3CSK4\_0.5H\_BMDC\_DN  
144 -0.2725854 -1.1038173 0.22900763  
0.33725387 1 1665 "tags=22%, list=12%, signal=24%"  
GSE27786\_NKCELL\_VS\_NEUTROPHIL\_DN GSE27786\_NKCELL\_VS\_NEUTROPHIL\_DN  
131 -0.27283162 -1.1031041 0.23756906  
0.338638 1 1009 "tags=14%, list=7%, signal=15%"  
GSE22432\_MULTIPOTENT\_PROGENITOR\_VS\_PDC\_UP  
GSE22432\_MULTIPOTENT\_PROGENITOR\_VS\_PDC\_UP  
147 -0.26707464 -1.1027402 0.2513863  
0.33928043 1 1268 "tags=14%, list=9%, signal=15%"  
GSE12963\_ENV\_NEF\_VS\_ENV\_NEF\_AND\_VPR\_DEFICIENT\_HIV1\_INF\_CD4\_TCELL\_UP  
GSE12963\_ENV\_NEF\_VS\_ENV\_NEF\_AND\_VPR\_DEFICIENT\_HIV1\_INF\_CD4\_TCELL\_UP  
96 -0.28349155 -1.1020837 0.26785713  
0.34057087 1 1638 "tags=18%, list=12%, signal=20%"  
GSE22935\_UNSTIM\_VS\_48H\_MBOVIS\_BCG\_STIM\_MACROPHAGE\_UP  
GSE22935\_UNSTIM\_VS\_48H\_MBOVIS\_BCG\_STIM\_MACROPHAGE\_UP  
144 -0.269036 -1.1017584 0.25384617  
0.34111562 1 1749 "tags=15%, list=12%, signal=17%"  
GSE11961\_FOLLICULAR\_BCELL\_VS\_MARGINAL\_ZONE\_BCELL\_UP  
GSE11961\_FOLLICULAR\_BCELL\_VS\_MARGINAL\_ZONE\_BCELL\_UP  
132 -0.27035737 -1.101234 0.24288425  
0.34208944 1 2074 "tags=19%, list=15%, signal=22%"  
GSE45365\_HEALTHY\_VS\_MCMV\_INFECTION\_CD8A\_DC\_DN  
GSE45365\_HEALTHY\_VS\_MCMV\_INFECTION\_CD8A\_DC\_DN  
153 -0.2668669 -1.1001921 0.24801587  
0.34419823 1 2412 "tags=22%, list=17%, signal=26%"  
GSE7764\_IL15\_NK\_CELL\_24H\_VS\_SPLENOCYTE\_DN  
GSE7764\_IL15\_NK\_CELL\_24H\_VS\_SPLENOCYTE\_DN  
141 -0.26834568 -1.1001283 0.2560297  
0.34412277 1 1491 "tags=17%, list=11%, signal=19%"  
GSE21063\_WT\_VS\_NFATC1\_KO\_8H\_ANTI\_IGM\_STIM\_BCELL\_DN  
GSE21063\_WT\_VS\_NFATC1\_KO\_8H\_ANTI\_IGM\_STIM\_BCELL\_DN  
124 -0.2755903 -1.1000254 0.28248587  
0.3441365 1 3531 "tags=38%, list=25%, signal=50%"  
GSE37336\_LY6C\_POS\_VS\_NEG\_NAIVE\_CD4\_TCELL\_DN  
GSE37336\_LY6C\_POS\_VS\_NEG\_NAIVE\_CD4\_TCELL\_DN  
100 -0.2799221 -1.0995101 0.27011493

0.34510386 1 4889 "tags=41%, list=35%, signal=62%"  
GSE7831\_UNSTIM\_VS\_CPG\_STIM\_PDC\_4H\_DN  
GSE7831\_UNSTIM\_VS\_CPG\_STIM\_PDC\_4H\_DN  
157 -0.2636708 -1.0992264 0.23608445  
0.3455183 1 1303 "tags=15%, list=9%, signal=17%"  
GSE42021\_CD24INT\_VS\_CD24LOW\_TCONV\_THYMUS\_UP  
GSE42021\_CD24INT\_VS\_CD24LOW\_TCONV\_THYMUS\_UP  
131 -0.27013573 -1.098581 0.26268116  
0.34680527 1 1467 "tags=17%, list=10%, signal=19%"  
GSE6259\_33D1\_POS\_VS\_DEC205\_POS\_SPLENIC\_DC\_UP  
GSE6259\_33D1\_POS\_VS\_DEC205\_POS\_SPLENIC\_DC\_UP  
125 -0.2726393 -1.0985395 0.23449612  
0.3466777 1 1817 "tags=20%, list=13%, signal=23%"  
GSE11864\_UNTREATED\_VS\_CSF1\_IFNG\_PAM3CYS\_IN\_MAC\_UP  
GSE11864\_UNTREATED\_VS\_CSF1\_IFNG\_PAM3CYS\_IN\_MAC\_UP  
129 -0.27637762 -1.0982542 0.28290766  
0.34710935 1 1771 "tags=21%, list=13%, signal=24%"  
GSE26351\_UNSTIM\_VS\_WNT\_PATHWAY\_STIM\_HEMATOPOIETIC\_PROGENITORS\_DN  
GSE26351\_UNSTIM\_VS\_WNT\_PATHWAY\_STIM\_HEMATOPOIETIC\_PROGENITORS\_DN  
145 -0.26601824 -1.097191 0.23076923  
0.3493245 1 1582 "tags=19%, list=11%, signal=22%"  
GSE7219\_WT\_VS\_NIK\_NFKB2\_KO\_LPS\_AND\_ANTI\_CD40\_STIM\_DC\_DN  
GSE7219\_WT\_VS\_NIK\_NFKB2\_KO\_LPS\_AND\_ANTI\_CD40\_STIM\_DC\_DN  
148 -0.26356116 -1.0969844 0.26434427  
0.34959108 1 1654 "tags=20%, list=12%, signal=22%"  
GSE1740\_MCSF\_VS\_MCSF\_AND\_IFNG\_DAY2\_DERIVED\_MACROPHAGE\_WITH\_IFNA\_STIM\_DN  
GSE1740\_MCSF\_VS\_MCSF\_AND\_IFNG\_DAY2\_DERIVED\_MACROPHAGE\_WITH\_IFNA\_STIM\_DN  
108 -0.28011236 -1.0967375  
0.25765765 0.34990528 1 2756 "tags=27%,  
list=20%, signal=33%"  
GSE360\_DC\_VS\_MAC\_T\_GONDII\_UP GSE360\_DC\_VS\_MAC\_T\_GONDII\_UP  
138 -0.26953262 -1.0967294 0.26418787  
0.34970057 1 3381 "tags=30%, list=24%, signal=40%"  
GSE35435\_RESTING\_VS\_IL4\_TREATED\_MACROPHAGE\_UP  
GSE35435\_RESTING\_VS\_IL4\_TREATED\_MACROPHAGE\_UP  
127 -0.27233157 -1.0964214 0.2576336  
0.3501795 1 1270 "tags=18%, list=9%, signal=20%"  
GSE25088\_CTRL\_VS\_IL4\_STIM\_STAT6\_KO\_MACROPHAGE\_DN  
GSE25088\_CTRL\_VS\_IL4\_STIM\_STAT6\_KO\_MACROPHAGE\_DN  
117 -0.27259132 -1.0959269 0.25 0.35109526  
1 2861 "tags=25%, list=20%, signal=31%"  
GSE3982\_MAST\_CELL\_VS\_NKCELL\_DN GSE3982\_MAST\_CELL\_VS\_NKCELL\_DN  
143 -0.2670652 -1.0958445 0.27643785  
0.3510704 1 1161 "tags=12%, list=8%, signal=13%"  
GSE1925\_3H\_VS\_24H\_IFNG\_STIM\_MACROPHAGE\_DN  
GSE1925\_3H\_VS\_24H\_IFNG\_STIM\_MACROPHAGE\_DN  
128 -0.2720639 -1.0955932 0.23962264  
0.3514481 1 1766 "tags=20%, list=13%, signal=23%"  
GSE21927\_GMCSF\_IL6\_VS\_GMCSF\_GCSF\_TREATED\_BONE\_MARROW\_UP  
GSE21927\_GMCSF\_IL6\_VS\_GMCSF\_GCSF\_TREATED\_BONE\_MARROW\_UP  
104 -0.27842793 -1.0952816 0.24859813  
0.35191846 1 3465 "tags=34%, list=25%, signal=44%"  
GSE5589\_LPS\_VS\_LPS\_AND\_IL10\_STIM\_IL6\_KO\_MACROPHAGE\_180MIN\_UP

GSE5589\_LPS\_VS\_LPS\_AND\_IL10\_STIM\_IL6\_KO\_MACROPHAGE\_180MIN\_UP  
140 -0.2648775 -1.0949455 0.23703703  
0.3524955 1 1799 "tags=21%, list=13%, signal=24%"  
GSE5589\_IL6\_KO\_VS\_IL10\_KO\_LPS\_AND\_IL10\_STIM\_MACROPHAGE\_45MIN\_UP  
GSE5589\_IL6\_KO\_VS\_IL10\_KO\_LPS\_AND\_IL10\_STIM\_MACROPHAGE\_45MIN\_UP  
149 -0.26271322 -1.0948589 0.25788498  
0.352476 1 939 "tags=11%, list=7%, signal=11%"  
GSE2770\_UNTREATED\_VS\_IL4\_TREATED\_ACT\_CD4\_TCELL\_6H\_UP  
GSE2770\_UNTREATED\_VS\_IL4\_TREATED\_ACT\_CD4\_TCELL\_6H\_UP  
155 -0.2663982 -1.0943407 0.238921 0.3534194  
1 1831 "tags=21%, list=13%, signal=24%"  
GSE12845\_IGD\_POS\_VS\_NEG\_BLOOD\_BCELL\_UP  
GSE12845\_IGD\_POS\_VS\_NEG\_BLOOD\_BCELL\_UP  
128 -0.27186972 -1.0943363 0.26732674  
0.35320395 1 1692 "tags=19%, list=12%, signal=21%"  
GSE16385\_UNTREATED\_VS\_12H\_ROSIGLITAZONE\_TREATED\_MACROPHAGE\_UP  
GSE16385\_UNTREATED\_VS\_12H\_ROSIGLITAZONE\_TREATED\_MACROPHAGE\_UP  
107 -0.27445704 -1.0931284 0.25868726  
0.35583025 1 4210 "tags=35%, list=30%, signal=49%"  
GSE43957\_UNTREATED\_VS\_NACL\_TREATED\_ANTI\_CD3\_CD28\_STIM\_CD4\_TCELL\_UP  
GSE43957\_UNTREATED\_VS\_NACL\_TREATED\_ANTI\_CD3\_CD28\_STIM\_CD4\_TCELL\_UP  
165 -0.26037693 -1.0925386 0.2541744  
0.3569075 1 3420 "tags=30%, list=24%, signal=40%"  
GSE1925\_CTRL\_VS\_3H\_IFNG\_STIM\_MACROPHAGE\_DN  
GSE1925\_CTRL\_VS\_3H\_IFNG\_STIM\_MACROPHAGE\_DN  
138 -0.26145175 -1.091415 0.2632613  
0.35929537 1 3108 "tags=26%, list=22%, signal=33%"  
GSE4142\_PLASMA\_CELL\_VS\_MEMORY\_BCELL\_UP  
GSE4142\_PLASMA\_CELL\_VS\_MEMORY\_BCELL\_UP  
132 -0.27063665 -1.0906646 0.27734375  
0.36085925 1 4649 "tags=33%, list=33%, signal=48%"  
GSE5679\_RARA\_AGONIST\_AM580\_VS\_AM580\_AND\_ROSIGLITAZONE\_TREATED\_DC\_UP  
GSE5679\_RARA\_AGONIST\_AM580\_VS\_AM580\_AND\_ROSIGLITAZONE\_TREATED\_DC\_UP  
155 -0.2634685 -1.0904083 0.26499033  
0.36126077 1 2441 "tags=21%, list=17%, signal=25%"  
GSE5589\_WT\_VS\_IL10\_KO\_LPS\_AND\_IL10\_STIM\_MACROPHAGE\_180MIN\_DN  
GSE5589\_WT\_VS\_IL10\_KO\_LPS\_AND\_IL10\_STIM\_MACROPHAGE\_180MIN\_DN  
93 -0.2800408 -1.0903487 0.2951128  
0.36117327 1 5116 "tags=43%, list=36%, signal=67%"  
GSE14908\_ATOPIC\_VS\_NONATOPIC\_PATIENT\_RESTING\_CD4\_TCELL\_UP  
GSE14908\_ATOPIC\_VS\_NONATOPIC\_PATIENT\_RESTING\_CD4\_TCELL\_UP  
147 -0.26049227 -1.0902797 0.26459143  
0.36111832 1 1491 "tags=15%, list=11%, signal=17%"  
GSE17721\_CTRL\_VS\_LPS\_0.5H\_BMDC\_DN GSE17721\_CTRL\_VS\_LPS\_0.5H\_BMDC\_DN  
157 -0.2627687 -1.0902236 0.29300568  
0.36101907 1 3596 "tags=32%, list=25%, signal=43%"  
GSE13306\_RA\_VS\_UNTREATED\_MEM\_CD4\_TCELL\_DN  
GSE13306\_RA\_VS\_UNTREATED\_MEM\_CD4\_TCELL\_DN  
147 -0.26336253 -1.0900201 0.26508227  
0.36128676 1 1138 "tags=12%, list=8%, signal=12%"  
GSE45365\_NK\_CELL\_VS\_BCELL\_DN GSE45365\_NK\_CELL\_VS\_BCELL\_DN  
104 -0.27689847 -1.0897363 0.2992126  
0.36171013 1 2560 "tags=21%, list=18%, signal=26%"  
GSE3982\_MAST\_CELL\_VS\_EFF\_MEMORY\_CD4\_TCELL\_UP

GSE3982\_MAST\_CELL\_VS\_EFF\_MEMORY\_CD4\_TCELL\_UP  
146 -0.26259616 -1.0897263 0.24157304  
0.36149886 1 1635 "tags=16%, list=12%, signal=18%"  
GSE32423\_IL7\_VS\_IL7\_IL4\_NAIVE\_CD8\_TCELL\_DN  
GSE32423\_IL7\_VS\_IL7\_IL4\_NAIVE\_CD8\_TCELL\_DN  
149 -0.26312694 -1.0891317 0.25656566  
0.36264697 1 2593 "tags=27%, list=18%, signal=33%"  
GSE557\_WT\_VS\_CIITA\_KO\_DC\_DN GSE557\_WT\_VS\_CIITA\_KO\_DC\_DN  
144 -0.26391616 -1.0890038 0.2781955  
0.36270154 1 1680 "tags=19%, list=12%, signal=21%"  
GSE360\_L\_MAJOR\_VS\_M\_TUBERCULOSIS\_DC\_DN  
GSE360\_L\_MAJOR\_VS\_M\_TUBERCULOSIS\_DC\_DN  
151 -0.2628485 -1.0882691 0.27321428  
0.36423844 1 1223 "tags=14%, list=9%, signal=15%"  
GSE15659\_TREG\_VS\_TCONV\_UP GSE15659\_TREG\_VS\_TCONV\_UP  
108 -0.27463877 -1.0882374 0.2851711  
0.36409336 1 2640 "tags=23%, list=19%, signal=28%"  
GSE40666\_WT\_VS\_STAT1\_KO\_CD8\_TCELL\_WITH\_IFNA\_STIM\_90MIN\_UP  
GSE40666\_WT\_VS\_STAT1\_KO\_CD8\_TCELL\_WITH\_IFNA\_STIM\_90MIN\_UP  
143 -0.2640872 -1.0879138 0.26386234  
0.36461473 1 1873 "tags=21%, list=13%, signal=24%"  
GSE37533\_PPARG1\_FOXP3\_VS\_PPARG2\_FOXP3\_TRANSDUCECD\_CD4\_TCELL\_PIOGLITAZ  
ONE\_TREATED\_UP  
GSE37533\_PPARG1\_FOXP3\_VS\_PPARG2\_FOXP3\_TRANSDUCECD\_CD4\_TCELL\_PIOGLITAZ  
ONE\_TREATED\_UP 142 -0.26283446 -1.0874026  
0.25291827 0.3656209 1 2315 "tags=24%,  
list=16%, signal=28%"  
GSE5589\_UNSTIM\_VS\_45MIN\_LPS\_AND\_IL10\_STIM\_MACROPHAGE\_DN  
GSE5589\_UNSTIM\_VS\_45MIN\_LPS\_AND\_IL10\_STIM\_MACROPHAGE\_DN  
144 -0.2630309 -1.0872711 0.26482213  
0.36569118 1 2331 "tags=23%, list=17%, signal=27%"  
GSE15659\_NAIVE\_CD4\_TCELL\_VS\_ACTIVATED\_TREG\_UP  
GSE15659\_NAIVE\_CD4\_TCELL\_VS\_ACTIVATED\_TREG\_UP  
117 -0.26872188 -1.0872556 0.29571983  
0.36549446 1 3249 "tags=28%, list=23%, signal=36%"  
GSE17721\_POLYIC\_VS\_GARDIQUIMOD\_8H\_BMDC\_UP  
GSE17721\_POLYIC\_VS\_GARDIQUIMOD\_8H\_BMDC\_UP  
160 -0.25949377 -1.0871359 0.24821429  
0.36552718 1 1675 "tags=18%, list=12%, signal=20%"  
GSE40274\_CTRL\_VS\_FOXP3\_AND\_PBX1\_TRANSDUCECD\_ACTIVATED\_CD4\_TCELL\_UP  
GSE40274\_CTRL\_VS\_FOXP3\_AND\_PBX1\_TRANSDUCECD\_ACTIVATED\_CD4\_TCELL\_UP  
122 -0.27090278 -1.087135 0.2651515  
0.36529896 1 2159 "tags=20%, list=15%, signal=24%"  
GSE41176\_UNSTIM\_VS\_ANTI\_IGM\_STIM\_TAK1\_KO\_BCELL\_3H\_DN  
GSE41176\_UNSTIM\_VS\_ANTI\_IGM\_STIM\_TAK1\_KO\_BCELL\_3H\_DN  
125 -0.27090913 -1.0866948 0.27634194  
0.36609948 1 5299 "tags=40%, list=38%, signal=63%"  
GSE15930\_STIM\_VS\_STIM\_AND\_IFNAB\_48H\_CD8\_T\_CELL\_DN  
GSE15930\_STIM\_VS\_STIM\_AND\_IFNAB\_48H\_CD8\_T\_CELL\_DN  
160 -0.2619668 -1.0866667 0.26459143  
0.3659377 1 2067 "tags=23%, list=15%, signal=27%"  
GSE2770\_TGFB\_AND\_IL4\_ACT\_VS\_ACT\_CD4\_TCELL\_6H\_DN  
GSE2770\_TGFB\_AND\_IL4\_ACT\_VS\_ACT\_CD4\_TCELL\_6H\_DN  
135 -0.26909295 -1.0864981 0.2835249

0.36610362 1 2233 "tags=24%, list=16%, signal=28%"  
GSE17721\_PAM3CSK4\_VS\_CPG\_1H\_BMDC\_DN  
GSE17721\_PAM3CSK4\_VS\_CPG\_1H\_BMDC\_DN  
162 -0.259841 -1.0862994 0.28 0.36636043  
1 1442 "tags=17%, list=10%, signal=19%"  
GSE7548\_NAIVE\_VS\_DAY28\_PCC\_IMMUNIZATION\_CD4\_TCELL\_UP  
GSE7548\_NAIVE\_VS\_DAY28\_PCC\_IMMUNIZATION\_CD4\_TCELL\_UP  
152 -0.2615477 -1.085921 0.259542 0.36704817  
1 2476 "tags=23%, list=18%, signal=28%"  
GSE27786\_BCELL\_VS\_NKTCELL\_UP GSE27786\_BCELL\_VS\_NKTCELL\_UP  
142 -0.2631649 -1.0857766 0.2725528  
0.36714488 1 1316 "tags=18%, list=9%, signal=19%"  
GSE24972\_MARGINAL\_ZONE\_BCELL\_VS\_FOLLICULAR\_BCELL\_UP  
GSE24972\_MARGINAL\_ZONE\_BCELL\_VS\_FOLLICULAR\_BCELL\_UP  
134 -0.2667057 -1.0853218 0.27186313  
0.3679917 1 1261 "tags=13%, list=9%, signal=15%"  
GSE3982\_DC\_VS\_MAC\_UP GSE3982\_DC\_VS\_MAC\_UP  
130 -0.26831424 -1.0852976 0.27985075  
0.36782166 1 1699 "tags=19%, list=12%, signal=22%"  
GSE21033\_CTRL\_VS\_POLYIC\_STIM\_DC\_1H\_DN  
GSE21033\_CTRL\_VS\_POLYIC\_STIM\_DC\_1H\_DN  
133 -0.26483166 -1.0852833 0.27220076  
0.36762658 1 2405 "tags=23%, list=17%, signal=28%"  
GSE36527\_CD62L\_HIGH\_CD69\_NEG\_VS\_CD62L\_LOW\_CD69\_POS\_TREG\_KLRG1\_NEG\_DN  
  
GSE36527\_CD62L\_HIGH\_CD69\_NEG\_VS\_CD62L\_LOW\_CD69\_POS\_TREG\_KLRG1\_NEG\_DN  
151 -0.26110664 -1.0846162  
0.28957528 0.3689881 1 2427 "tags=24%,  
list=17%, signal=28%"  
GSE17974\_CTRL\_VS\_ACT\_IL4\_AND\_ANTI\_IL12\_2H\_CD4\_TCELL\_UP  
GSE17974\_CTRL\_VS\_ACT\_IL4\_AND\_ANTI\_IL12\_2H\_CD4\_TCELL\_UP  
125 -0.26694 -1.0843885 0.31296295 0.36930367  
1 2511 "tags=26%, list=18%, signal=32%"  
GSE41978\_WT\_VS\_BIM\_KO\_KLRG1\_LOW\_EFFECTOR\_CD8\_TCELL\_UP  
GSE41978\_WT\_VS\_BIM\_KO\_KLRG1\_LOW\_EFFECTOR\_CD8\_TCELL\_UP  
136 -0.26438498 -1.0840714 0.26213592  
0.36984456 1 3677 "tags=32%, list=26%, signal=43%"  
GSE27786\_LSK\_VS\_NKCELL\_UP GSE27786\_LSK\_VS\_NKCELL\_UP  
141 -0.26561382 -1.0839574 0.27671754  
0.36986914 1 1870 "tags=24%, list=13%, signal=28%"  
GSE21670\_IL6\_VS\_TGFB\_AND\_IL6\_TREATED\_CD4\_TCELL\_UP  
GSE21670\_IL6\_VS\_TGFB\_AND\_IL6\_TREATED\_CD4\_TCELL\_UP  
123 -0.2669255 -1.0838944 0.28707224  
0.3697851 1 1631 "tags=18%, list=12%, signal=20%"  
GSE17721\_CPG\_VS\_GARDIQUIMOD\_6H\_BMDC\_UP  
GSE17721\_CPG\_VS\_GARDIQUIMOD\_6H\_BMDC\_UP  
160 -0.25925046 -1.0836765 0.2642857  
0.3700807 1 1035 "tags=13%, list=7%, signal=13%"  
GSE3982 EFF\_MEMORY\_CD4\_TCELL\_VS\_TH1\_UP  
GSE3982 EFF\_MEMORY\_CD4\_TCELL\_VS\_TH1\_UP  
128 -0.26995754 -1.0832856 0.28235295  
0.37073752 1 1889 "tags=16%, list=13%, signal=19%"  
GSE32423\_IL7\_VS\_IL7\_IL4\_MEMORY\_CD8\_TCELL\_UP  
GSE32423\_IL7\_VS\_IL7\_IL4\_MEMORY\_CD8\_TCELL\_UP

|                                                                  |                                                                  |            |                                  |
|------------------------------------------------------------------|------------------------------------------------------------------|------------|----------------------------------|
| 127                                                              | -0.26663676                                                      | -1.0832148 | 0.2848837                        |
| 0.37067902                                                       | 1                                                                | 1328       | "tags=18%, list=9%, signal=20%"  |
| GSE42724_NAIVE_VS_MEMORY_BCELL_UP                                | GSE42724_NAIVE_VS_MEMORY_BCELL_UP                                |            |                                  |
| 140                                                              | -0.26553094                                                      | -1.0829535 | 0.28988326                       |
| 0.3710489                                                        | 1                                                                | 2168       | "tags=20%, list=15%, signal=23%" |
| GSE20500_CTRL_VS_RETINOIC_ACID_TREATED_CD4_TCELL_DN              | GSE20500_CTRL_VS_RETINOIC_ACID_TREATED_CD4_TCELL_DN              |            |                                  |
| 142                                                              | -0.26146704                                                      | -1.0825182 | 0.2556818                        |
| 0.37189633                                                       | 1                                                                | 3860       | "tags=32%, list=27%, signal=44%" |
| GSE33162_HDAC3_KO_VS_HDAC3_KO_4H_LPS_STIM_MACROPHAGE_UP          | GSE33162_HDAC3_KO_VS_HDAC3_KO_4H_LPS_STIM_MACROPHAGE_UP          |            |                                  |
| 151                                                              | -0.26294637                                                      | -1.0822942 | 0.26181102                       |
| 0.37219593                                                       | 1                                                                | 1879       | "tags=19%, list=13%, signal=22%" |
| GSE22886_NAIVE_TCELL_VS_DC_UP                                    | GSE22886_NAIVE_TCELL_VS_DC_UP                                    |            |                                  |
| 124                                                              | -0.26984018                                                      | -1.0822815 | 0.29433963                       |
| 0.37199792                                                       | 1                                                                | 1172       | "tags=16%, list=8%, signal=17%"  |
| GSE17186_NAIVE_VS_CD21HIGH_TRANSITIONAL_BCELL_UP                 | GSE17186_NAIVE_VS_CD21HIGH_TRANSITIONAL_BCELL_UP                 |            |                                  |
| 141                                                              | -0.25989676                                                      | -1.0815765 | 0.26824456                       |
| 0.37344772                                                       | 1                                                                | 1984       | "tags=20%, list=14%, signal=23%" |
| GSE8685_IL2_STARVED_VS_IL15_ACT_IL2_STARVED_CD4_TCELL_UP         | GSE8685_IL2_STARVED_VS_IL15_ACT_IL2_STARVED_CD4_TCELL_UP         |            |                                  |
| 132                                                              | -0.2652332                                                       | -1.0812609 | 0.2952381                        |
| 0.37398314                                                       | 1                                                                | 1779       | "tags=18%, list=13%, signal=21%" |
| GSE17721_POLYIC_VS_GARDIQUIMOD_16H_BMDC_UP                       | GSE17721_POLYIC_VS_GARDIQUIMOD_16H_BMDC_UP                       |            |                                  |
| 145                                                              | -0.2581415                                                       | -1.0807074 | 0.29445508                       |
| 0.3750461                                                        | 1                                                                | 1591       | "tags=17%, list=11%, signal=18%" |
| GSE14308_TH2_VS_TH1_DN                                           | GSE14308_TH2_VS_TH1_DN                                           |            |                                  |
| 149                                                              | -0.26099655                                                      | -1.080373  | 0.28761905                       |
| 0.3756209                                                        | 1                                                                | 2149       | "tags=23%, list=15%, signal=27%" |
| GSE11961_MARGINAL_ZONE_BCELL_VS_GERMINAL_CENTER_BCELL_DAY40_UP   | GSE11961_MARGINAL_ZONE_BCELL_VS_GERMINAL_CENTER_BCELL_DAY40_UP   |            |                                  |
| 140                                                              | -0.26331192                                                      | -1.0803692 | 0.27364185                       |
| 0.37539375                                                       | 1                                                                | 1631       | "tags=18%, list=12%, signal=20%" |
| GSE39152_SPLEEN_CD103_NEG_VS_BRAIN_CD103_POS_MEMORY_CD8_TCELL_DN | GSE39152_SPLEEN_CD103_NEG_VS_BRAIN_CD103_POS_MEMORY_CD8_TCELL_DN |            |                                  |
| 170                                                              | -0.25971475                                                      | -1.0803219 | 0.28820115                       |
| 0.37527958                                                       | 1                                                                | 2738       | "tags=24%, list=19%, signal=30%" |
| GSE29615_CTRL_VS_DAY3_LAIV_IFLU_VACCINE_PBMC_UP                  | GSE29615_CTRL_VS_DAY3_LAIV_IFLU_VACCINE_PBMC_UP                  |            |                                  |
| 136                                                              | -0.26300058                                                      | -1.0798881 | 0.28599605                       |
| 0.3760451                                                        | 1                                                                | 2031       | "tags=21%, list=14%, signal=24%" |
| GSE27859_DC_VS_CD11C_INT_F480_INT_DC_UP                          | GSE27859_DC_VS_CD11C_INT_F480_INT_DC_UP                          |            |                                  |
| 148                                                              | -0.26392856                                                      | -1.0788307 | 0.28465804                       |
| 0.37838125                                                       | 1                                                                | 1953       | "tags=20%, list=14%, signal=23%" |
| GSE6674_UNSTIM_VS_CPG_STIM_BCELL_DN                              | GSE6674_UNSTIM_VS_CPG_STIM_BCELL_DN                              |            |                                  |
| 132                                                              | -0.26491046                                                      | -1.0787892 | 0.29504952                       |
| 0.3782473                                                        | 1                                                                | 2494       | "tags=24%, list=18%, signal=29%" |
| GSE22432_PDC_VS_TGFB1_TREATEDCOMMON_DC_PROGENITOR_DN             | GSE22432_PDC_VS_TGFB1_TREATEDCOMMON_DC_PROGENITOR_DN             |            |                                  |
| 149                                                              | -0.26256907                                                      | -1.0784473 | 0.30812854                       |

0.3788318 1 1665 "tags=23%, list=12%, signal=26%"  
GSE5455\_HEALTHY\_VS\_TUMOR\_BEARING\_MOUSE\_SPLEEN\_MONOCYTE\_DN  
GSE5455\_HEALTHY\_VS\_TUMOR\_BEARING\_MOUSE\_SPLEEN\_MONOCYTE\_DN  
156 -0.2580062 -1.078079 0.24950884  
0.37949494 1 1135 "tags=13%, list=8%, signal=14%"  
GSE11864\_UNTREATED\_VS\_CSF1\_IFNG\_PAM3CYS\_IN\_MAC\_DN  
GSE11864\_UNTREATED\_VS\_CSF1\_IFNG\_PAM3CYS\_IN\_MAC\_DN  
137 -0.2602288 -1.0780315 0.3003663  
0.37937632 1 1536 "tags=18%, list=11%, signal=20%"  
GSE9960\_GRAM\_POS\_VS\_GRAM\_NEG\_AND\_POS\_SEPSIS\_PBMC\_UP  
GSE9960\_GRAM\_POS\_VS\_GRAM\_NEG\_AND\_POS\_SEPSIS\_PBMC\_UP  
150 -0.25970453 -1.0776248 0.28626692  
0.38008246 1 1399 "tags=17%, list=10%, signal=19%"  
GSE9960\_HEALTHY\_VS\_GRAM\_NEG\_SEPSIS\_PBMC\_UP  
GSE9960\_HEALTHY\_VS\_GRAM\_NEG\_SEPSIS\_PBMC\_UP  
145 -0.2621516 -1.0775098 0.26857144  
0.3801345 1 1378 "tags=18%, list=10%, signal=20%"  
GSE24972\_WT\_VS\_IRF8\_KO\_MARGINAL\_ZONE\_SPLEEN\_BCELL\_UP  
GSE24972\_WT\_VS\_IRF8\_KO\_MARGINAL\_ZONE\_SPLEEN\_BCELL\_UP  
147 -0.26074126 -1.0774809 0.29651162  
0.37997663 1 1074 "tags=16%, list=8%, signal=17%"  
GSE360\_T\_GONDII\_VS\_M\_TUBERCULOSIS\_DC\_DN  
GSE360\_T\_GONDII\_VS\_M\_TUBERCULOSIS\_DC\_DN  
150 -0.2572736 -1.0774401 0.28703704  
0.37983254 1 1516 "tags=18%, list=11%, signal=20%"  
GSE17974\_0H\_VS\_1H\_IN\_VITRO\_ACT\_CD4\_TCELL\_UP  
GSE17974\_0H\_VS\_1H\_IN\_VITRO\_ACT\_CD4\_TCELL\_UP  
112 -0.27434194 -1.0773841 0.28962818  
0.37971935 1 2615 "tags=27%, list=19%, signal=33%"  
GSE40274\_FOXP3\_VS\_FOXP3\_AND\_GATA1\_TRANSDUCE\_ACTIVATED\_CD4\_TCELL\_UP  
GSE40274\_FOXP3\_VS\_FOXP3\_AND\_GATA1\_TRANSDUCE\_ACTIVATED\_CD4\_TCELL\_UP  
140 -0.26516572 -1.0773001 0.29389313  
0.3796992 1 2262 "tags=19%, list=16%, signal=22%"  
GSE13887\_RESTING\_VS\_NO\_TREATED\_CD4\_TCELL\_UP  
GSE13887\_RESTING\_VS\_NO\_TREATED\_CD4\_TCELL\_UP  
100 -0.27650306 -1.0771366 0.3007663  
0.37984437 1 6817 "tags=56%, list=48%, signal=108%"  
GSE369\_PRE\_VS\_POST\_IL6\_INJECTION\_SOCS3\_KO\_LIVER\_UP  
GSE369\_PRE\_VS\_POST\_IL6\_INJECTION\_SOCS3\_KO\_LIVER\_UP  
141 -0.2615482 -1.0771271 0.29205176  
0.3796342 1 1926 "tags=21%, list=14%, signal=24%"  
GSE16385\_MONOCYTE\_VS\_MACROPHAGE\_DN  
GSE16385\_MONOCYTE\_VS\_MACROPHAGE\_DN  
136 -0.26135907 -1.0769669 0.28219697  
0.37979963 1 2607 "tags=21%, list=18%, signal=25%"  
GSE2770\_TGFB\_AND\_IL4\_VS\_IL12\_TREATED\_ACT\_CD4\_TCELL\_6H\_UP  
GSE2770\_TGFB\_AND\_IL4\_VS\_IL12\_TREATED\_ACT\_CD4\_TCELL\_6H\_UP  
149 -0.26031289 -1.0768974 0.2932039  
0.37973747 1 1962 "tags=21%, list=14%, signal=24%"  
GSE22589\_HEALTHY\_VS\_SIV\_INFECTED\_DC\_DN  
GSE22589\_HEALTHY\_VS\_SIV\_INFECTED\_DC\_DN  
155 -0.25716385 -1.0765767 0.2962264  
0.38026145 1 1779 "tags=16%, list=13%, signal=18%"  
GSE24210\_RESTING\_TREG\_VS\_TCONV\_UP GSE24210\_RESTING\_TREG\_VS\_TCONV\_UP

|                                                                  |     |             |                                  |            |
|------------------------------------------------------------------|-----|-------------|----------------------------------|------------|
| 0.3818467                                                        | 145 | -0.26376837 | -1.0758293                       | 0.28917912 |
| GSE31082_DN_VS_CD8_SP_THYMOCYTE_DN                               | 1   | 1998        | "tags=23%, list=14%, signal=27%" |            |
| GSE31082_DN_VS_CD8_SP_THYMOCYTE_DN                               |     |             |                                  |            |
| 0.3819717                                                        | 155 | -0.25891593 | -1.0756813                       | 0.2840691  |
| GSE27786_NKTCELL_VS_NEUTROPHIL_UP                                | 1   | 1890        | "tags=20%, list=13%, signal=23%" |            |
| GSE27786_NKTCELL_VS_NEUTROPHIL_UP                                |     |             |                                  |            |
| 0.38178697                                                       | 136 | -0.2648174  | -1.0756615                       | 0.28375733 |
| GSE26669_CD4_VS_CD8_TCELL_IN_MLR_UP                              | 1   | 805         | "tags=15%, list=6%, signal=16%"  |            |
| GSE26669_CD4_VS_CD8_TCELL_IN_MLR_UP                              |     |             |                                  |            |
| 0.38155603                                                       | 148 | -0.2580397  | -1.0756592                       | 0.27992633 |
| GSE2585_CD80_HIGH_VS_LOW_MTEC_UP                                 | 1   | 2426        | "tags=25%, list=17%, signal=30%" |            |
| GSE2585_CD80_HIGH_VS_LOW_MTEC_UP                                 |     |             |                                  |            |
| 0.38142982                                                       | 129 | -0.26175973 | -1.0756179                       | 0.28764477 |
| GSE37416_CTRL_VS_24H_F_TULARENSIS_LVS_NEUTROPHIL_DN              | 1   | 6206        | "tags=53%, list=44%, signal=93%" |            |
| GSE37416_CTRL_VS_24H_F_TULARENSIS_LVS_NEUTROPHIL_DN              |     |             |                                  |            |
| 0.38141993                                                       | 143 | -0.2607269  | -1.0755292                       | 0.27431905 |
| GSE32986_CURDLAN_LOWDOSE_VS_GMCSF_AND_CURDLAN_LOWDOSE_STIM_DC_DN | 1   | 1638        | "tags=20%, list=12%, signal=23%" |            |
| GSE32986_CURDLAN_LOWDOSE_VS_GMCSF_AND_CURDLAN_LOWDOSE_STIM_DC_DN |     |             |                                  |            |
| 0.3818638                                                        | 140 | -0.26509026 | -1.0752397                       | 0.2848837  |
| GSE8384_CTRL_VS_B_ABORTUS_4H_MAC_CELL_LINE_DN                    | 1   | 1804        | "tags=22%, list=13%, signal=25%" |            |
| GSE8384_CTRL_VS_B_ABORTUS_4H_MAC_CELL_LINE_DN                    |     |             |                                  |            |
| 0.38190395                                                       | 161 | -0.25960928 | -1.0751237                       | 0.28355387 |
| GSE13522_CTRL_VS_T_CRUZI_BRAZIL_STRAIN_INF_SKIN_DN               | 1   | 1776        | "tags=20%, list=13%, signal=22%" |            |
| GSE13522_CTRL_VS_T_CRUZI_BRAZIL_STRAIN_INF_SKIN_DN               |     |             |                                  |            |
| 0.3818382                                                        | 147 | -0.26055753 | -1.0750513                       | 0.270073   |
| GSE24142_EARLY_THYMIC_PROGENITOR_VS_DN3_THYMOCYTE_FETAL_UP       | 1   | 1991        | "tags=18%, list=14%, signal=21%" |            |
| GSE24142_EARLY_THYMIC_PROGENITOR_VS_DN3_THYMOCYTE_FETAL_UP       |     |             |                                  |            |
| 0.3834974                                                        | 151 | -0.257808   | -1.0742807                       | 0.28675136 |
| GSE14000_TRANSLATED_RNA_VS_MRNA_16H_LPS_DC_UP                    | 1   | 1262        | "tags=17%, list=9%, signal=18%"  |            |
| GSE14000_TRANSLATED_RNA_VS_MRNA_16H_LPS_DC_UP                    |     |             |                                  |            |
| 0.3845027                                                        | 106 | -0.2744114  | -1.0737712                       | 0.28651685 |
| GSE43955_10H_VS_30H_ACT_CD4_TCELL_DN                             | 1   | 2675        | "tags=23%, list=19%, signal=28%" |            |
| GSE43955_10H_VS_30H_ACT_CD4_TCELL_DN                             |     |             |                                  |            |
| 0.3863364                                                        | 170 | -0.25154147 | -1.0729269                       | 0.27       |
| GSE17974_0H_VS_2H_IN_VITRO_ACT_CD4_TCELL_DN                      | 1   | 2191        | "tags=18%, list=16%, signal=21%" |            |
| GSE17974_0H_VS_2H_IN_VITRO_ACT_CD4_TCELL_DN                      |     |             |                                  |            |
| 0.38626322                                                       | 128 | -0.26709023 | -1.0728606                       | 0.3040153  |
| GSE24142_DN2_VS_DN3_THYMOCYTE_DN                                 | 1   | 821         | "tags=13%, list=6%, signal=14%"  |            |
| GSE24142_DN2_VS_DN3_THYMOCYTE_DN                                 |     |             |                                  |            |
| 0.38680792                                                       | 162 | -0.25901765 | -1.0725305                       | 0.31384015 |
| GSE5589_WT_VS_IL10_KO_LPS_STIM_MACROPHAGE_180MIN_DN              | 1   | 2138        | "tags=20%, list=15%, signal=23%" |            |
| GSE5589_WT_VS_IL10_KO_LPS_STIM_MACROPHAGE_180MIN_DN              |     |             |                                  |            |
| 0.29718876                                                       | 129 | -0.26467168 | -1.0724916                       | 0.29718876 |



0.38667828 1 1670 "tags=16%, list=12%, signal=18%"  
GSE37533\_PPARG2\_FOXP3\_VS\_FOXP3\_TRANSDUCECD4\_TCELL\_PIOGLITAZONE\_TRE  
ATED\_UP  
GSE37533\_PPARG2\_FOXP3\_VS\_FOXP3\_TRANSDUCECD4\_TCELL\_PIOGLITAZONE\_TRE  
ATED\_UP 147 -0.25657701 -1.0719016  
0.2889306 0.38787422 1 2102 "tags=19%,  
list=15%, signal=22%"  
GSE36095\_WT\_VS\_HDAC9\_KO\_TREG\_DN GSE36095\_WT\_VS\_HDAC9\_KO\_TREG\_DN  
95 -0.27654833 -1.0716459 0.32518798  
0.38826847 1 3176 "tags=23%, list=23%, signal=30%"  
GSE16697\_CD4\_TCELL\_VS\_TFH\_CD4\_TCELL\_UP  
GSE16697\_CD4\_TCELL\_VS\_TFH\_CD4\_TCELL\_UP  
149 -0.26056594 -1.0716121 0.29259259 0.388109  
1 1858 "tags=21%, list=13%, signal=24%"  
GSE1460\_NAIVE\_CD4\_TCELL\_CORD\_BLOOD\_VS\_THYMIC\_STROMAL\_CELL\_UP  
GSE1460\_NAIVE\_CD4\_TCELL\_CORD\_BLOOD\_VS\_THYMIC\_STROMAL\_CELL\_UP  
127 -0.2657812 -1.0714707 0.29961833  
0.3882176 1 2369 "tags=19%, list=17%, signal=23%"  
GSE11961\_MEMORY\_BCELL\_DAY7\_VS\_GERMINAL\_CENTER\_BCELL\_DAY40\_UP  
GSE11961\_MEMORY\_BCELL\_DAY7\_VS\_GERMINAL\_CENTER\_BCELL\_DAY40\_UP  
136 -0.26385036 -1.0713938 0.29174665  
0.38817316 1 2163 "tags=21%, list=15%, signal=25%"  
GSE10211\_UV\_INACT\_SENDAI\_VS\_LIVE\_SENDAI\_VIRUS\_TRACHEAL\_EPITHELIAL\_CE  
LLS\_UP  
GSE10211\_UV\_INACT\_SENDAI\_VS\_LIVE\_SENDAI\_VIRUS\_TRACHEAL\_EPITHELIAL\_CE  
LLS\_UP 118 -0.26452982 -1.071188  
0.3364486 0.3884449 1 2373 "tags=22%,  
list=17%, signal=26%"  
GSE12198\_CTRL\_VS\_HIGH\_IL2\_STIM\_NK\_CELL\_DN  
GSE12198\_CTRL\_VS\_HIGH\_IL2\_STIM\_NK\_CELL\_DN  
160 -0.2557372 -1.0705712 0.30938125  
0.3897217 1 1397 "tags=16%, list=10%, signal=18%"  
GSE18281\_SUBCAPSULAR\_VS\_PERIMEDULLARY\_CORTICAL\_REGION\_OF\_THYMUS\_DN  
GSE18281\_SUBCAPSULAR\_VS\_PERIMEDULLARY\_CORTICAL\_REGION\_OF\_THYMUS\_DN  
140 -0.2609371 -1.0703744 0.2818533  
0.38996503 1 2670 "tags=22%, list=19%, signal=27%"  
GSE36888\_UNTREATED\_VS\_IL2\_TREATED\_STAT5\_AB\_KNOCKIN\_TCELL\_17H\_DN  
GSE36888\_UNTREATED\_VS\_IL2\_TREATED\_STAT5\_AB\_KNOCKIN\_TCELL\_17H\_DN  
137 -0.2612603 -1.0700161 0.3045977  
0.3906049 1 2283 "tags=23%, list=16%, signal=28%"  
GSE41867\_DAY6\_VS\_DAY15\_LCMV\_ARMSTRONG\_EFFECTOR\_CD8\_TCELL\_DN  
GSE41867\_DAY6\_VS\_DAY15\_LCMV\_ARMSTRONG\_EFFECTOR\_CD8\_TCELL\_DN  
130 -0.26650485 -1.069357 0.31688803  
0.39198545 1 627 "tags=11%, list=4%, signal=11%"  
GSE21927\_HEALTHY\_VS\_TUMOROUS\_BALBC\_MOUSE\_MONOCYTE\_UP  
GSE21927\_HEALTHY\_VS\_TUMOROUS\_BALBC\_MOUSE\_MONOCYTE\_UP  
121 -0.26816407 -1.0692475 0.33665338  
0.39203992 1 2843 "tags=26%, list=20%, signal=33%"  
GSE2770\_IL12\_AND\_TGFB\_VS\_IL4\_TREATED\_ACT\_CD4\_TCELL\_6H\_DN  
GSE2770\_IL12\_AND\_TGFB\_VS\_IL4\_TREATED\_ACT\_CD4\_TCELL\_6H\_DN  
146 -0.25958392 -1.0688614 0.29766536  
0.39275387 1 5484 "tags=51%, list=39%, signal=82%"  
GSE35435\_RESTING\_VS\_IL4\_TREATED\_MACROPHAGE\_DN  
GSE35435\_RESTING\_VS\_IL4\_TREATED\_MACROPHAGE\_DN

126 -0.2637974 -1.0685339 0.31407943  
0.39329717 1 1869 "tags=21%, list=13%, signal=24%"  
GSE20727\_CTRL\_VS\_DNFB\_ALLERGEN\_TREATED\_DC\_DN  
GSE20727\_CTRL\_VS\_DNFB\_ALLERGEN\_TREATED\_DC\_DN  
113 -0.2680647 -1.0675602 0.28977272  
0.3954916 1 2084 "tags=18%, list=15%, signal=21%"  
GSE1791\_CTRL\_VS\_NEUROMEDINU\_IN\_T\_CELL\_LINE\_6H\_DN  
GSE1791\_CTRL\_VS\_NEUROMEDINU\_IN\_T\_CELL\_LINE\_6H\_DN  
136 -0.26339963 -1.0674939 0.2932039  
0.39541367 1 2481 "tags=28%, list=18%, signal=34%"  
GSE24142\_EARLY\_THYMIC\_PROGENITOR\_VS\_DN3\_THYMOCYTE\_ADULT\_UP  
GSE24142\_EARLY\_THYMIC\_PROGENITOR\_VS\_DN3\_THYMOCYTE\_ADULT\_UP  
159 -0.25592655 -1.0673232 0.2768031  
0.39560294 1 1159 "tags=14%, list=8%, signal=15%"  
GSE17721\_CPG\_VS\_GARDIQUIMOD\_4H\_BMDC\_UP  
GSE17721\_CPG\_VS\_GARDIQUIMOD\_4H\_BMDC\_UP  
156 -0.25676388 -1.0673181 0.29963234  
0.39537677 1 1662 "tags=19%, list=12%, signal=21%"  
GSE42021\_TCONV\_PLN\_VS\_CD24HI\_TCONV\_THYMUS\_UP  
GSE42021\_TCONV\_PLN\_VS\_CD24HI\_TCONV\_THYMUS\_UP  
144 -0.26172835 -1.0658702 0.30508474  
0.39875925 1 1752 "tags=21%, list=12%, signal=24%"  
GSE27786\_LIN\_NEG\_VS\_NKCELL\_DN GSE27786\_LIN\_NEG\_VS\_NKCELL\_DN  
154 -0.25285593 -1.0657614 0.29928315  
0.3988147 1 1347 "tags=18%, list=10%, signal=19%"  
GSE3982\_DC\_VS\_CENT\_MEMORY\_CD4\_TCELL\_DN  
GSE3982\_DC\_VS\_CENT\_MEMORY\_CD4\_TCELL\_DN  
118 -0.267887 -1.0654465 0.31214952  
0.39936033 1 1845 "tags=18%, list=13%, signal=20%"  
GSE27786\_CD4\_VS\_CD8\_TCELL\_DN GSE27786\_CD4\_VS\_CD8\_TCELL\_DN  
136 -0.26138198 -1.0651383 0.3135436  
0.39985886 1 1602 "tags=16%, list=11%, signal=18%"  
GSE1740\_UNSTIM\_VS\_IFNA\_STIMULATED\_MCSF\_DERIVED\_MACROPHAGE\_DN  
GSE1740\_UNSTIM\_VS\_IFNA\_STIMULATED\_MCSF\_DERIVED\_MACROPHAGE\_DN  
109 -0.26904705 -1.0650963 0.32495165  
0.39972985 1 2159 "tags=28%, list=15%, signal=32%"  
GSE20152\_SPHK1\_KO\_VS\_WT\_HTNFA\_OVERXPRESS\_ANKLE\_UP  
GSE20152\_SPHK1\_KO\_VS\_WT\_HTNFA\_OVERXPRESS\_ANKLE\_UP  
136 -0.25768572 -1.0650398 0.3229572  
0.39963126 1 2440 "tags=21%, list=17%, signal=25%"  
GSE1925\_3H\_VS\_24H\_IFNG\_STIM\_IFNG\_PRIMED\_MACROPHAGE\_UP  
GSE1925\_3H\_VS\_24H\_IFNG\_STIM\_IFNG\_PRIMED\_MACROPHAGE\_UP  
161 -0.25515386 -1.0647917 0.3031496  
0.40002593 1 1878 "tags=22%, list=13%, signal=25%"  
GSE13887\_RESTING\_VS\_NO\_TREATED\_CD4\_TCELL\_DN  
GSE13887\_RESTING\_VS\_NO\_TREATED\_CD4\_TCELL\_DN  
82 -0.28254035 -1.0647548 0.32780847  
0.3998766 1 2987 "tags=26%, list=21%, signal=32%"  
GSE16386\_IL4\_VS\_IL4\_AND\_ROSIGLITAZONE\_STIM\_MACROPHAGE\_6H\_DN  
GSE16386\_IL4\_VS\_IL4\_AND\_ROSIGLITAZONE\_STIM\_MACROPHAGE\_6H\_DN  
136 -0.2596495 -1.0641798 0.3095685  
0.40106928 1 2186 "tags=19%, list=15%, signal=22%"  
GSE6269\_STAPH\_AUREUS\_VS\_STREP\_PNEUMO\_INF\_PBMC\_UP  
GSE6269\_STAPH\_AUREUS\_VS\_STREP\_PNEUMO\_INF\_PBMC\_UP

137 -0.25786978 -1.0637418 0.31496063  
0.40190658 1 2158 "tags=22%, list=15%, signal=26%"  
GSE29618\_BCELL\_VS\_MONOCYTE\_DAY7\_FLU\_VACCINE\_UP  
GSE29618\_BCELL\_VS\_MONOCYTE\_DAY7\_FLU\_VACCINE\_UP  
126 -0.26501125 -1.063599 0.3326886  
0.4020283 1 2410 "tags=21%, list=17%, signal=26%"  
GSE34156\_UNTREATED\_VS\_6H\_NOD2\_LIGAND\_TREATED\_MONOCYTE\_DN  
GSE34156\_UNTREATED\_VS\_6H\_NOD2\_LIGAND\_TREATED\_MONOCYTE\_DN  
136 -0.2602814 -1.0633779 0.3139535  
0.40233797 1 2491 "tags=26%, list=18%, signal=31%"  
GSE46606\_DAY1\_VS\_DAY3\_CD40L\_IL2\_IL5\_STIMULATED\_BCELL\_DN  
GSE46606\_DAY1\_VS\_DAY3\_CD40L\_IL2\_IL5\_STIMULATED\_BCELL\_DN  
138 -0.25962216 -1.062843 0.2981132  
0.40341735 1 2475 "tags=22%, list=18%, signal=27%"  
GSE26559\_TCF1\_KO\_VS\_WT\_LIN\_NEG\_CELL\_DN  
GSE26559\_TCF1\_KO\_VS\_WT\_LIN\_NEG\_CELL\_DN  
143 -0.25471377 -1.0625126 0.29821074  
0.4039654 1 4748 "tags=38%, list=34%, signal=57%"  
GSE24726\_WT\_VS\_E2\_2\_KO\_PDC\_DAY4\_POST\_DELETION\_UP  
GSE24726\_WT\_VS\_E2\_2\_KO\_PDC\_DAY4\_POST\_DELETION\_UP  
147 -0.26035476 -1.061993 0.30268198  
0.4050532 1 1622 "tags=19%, list=11%, signal=21%"  
GSE1460\_DP\_THYMOCYTE\_VS\_THYMIC\_STROMAL\_CELL\_DN  
GSE1460\_DP\_THYMOCYTE\_VS\_THYMIC\_STROMAL\_CELL\_DN  
145 -0.2564782 -1.0619811 0.33973128  
0.40483603 1 1146 "tags=15%, list=8%, signal=16%"  
GSE35543\_IN\_VIVO\_NTREG\_VS\_CONVERTED\_EX\_ITREG\_DN  
GSE35543\_IN\_VIVO\_NTREG\_VS\_CONVERTED\_EX\_ITREG\_DN  
136 -0.25853756 -1.0609125 0.3108911  
0.4073124 1 6067 "tags=49%, list=43%, signal=86%"  
GSE26928\_NAIVE\_VS\_EFF\_MEMORY\_CD4\_TCELL\_UP  
GSE26928\_NAIVE\_VS\_EFF\_MEMORY\_CD4\_TCELL\_UP  
105 -0.26857185 -1.0593253 0.33826247  
0.41099578 1 2085 "tags=22%, list=15%, signal=26%"  
GSE40274\_CTRL\_VS\_FOXP3\_AND\_EOS\_TRANSDUCED\_ACTIVATED\_CD4\_TCELL\_DN  
GSE40274\_CTRL\_VS\_FOXP3\_AND\_EOS\_TRANSDUCED\_ACTIVATED\_CD4\_TCELL\_DN  
128 -0.26062548 -1.0591547 0.3255814  
0.4111904 1 2840 "tags=24%, list=20%, signal=30%"  
GSE40274\_LEF1\_VS\_FOXP3\_AND\_LEF1\_TRANSDUCED\_ACTIVATED\_CD4\_TCELL\_DN  
GSE40274\_LEF1\_VS\_FOXP3\_AND\_LEF1\_TRANSDUCED\_ACTIVATED\_CD4\_TCELL\_DN  
143 -0.25997776 -1.0590807 0.32089552  
0.4111225 1 2439 "tags=23%, list=17%, signal=28%"  
GSE26488\_WT\_VS\_VP16\_TRANSGENIC\_HDAC7\_KO\_DOUBLE\_POSITIVE\_THYMOCYTE\_DN  
  
GSE26488\_WT\_VS\_VP16\_TRANSGENIC\_HDAC7\_KO\_DOUBLE\_POSITIVE\_THYMOCYTE\_DN  
135 -0.26159242 -1.0587027  
0.32777777 0.41178128 1 1702 "tags=20%,  
list=12%, signal=23%"  
GSE10325\_CD4\_TCELL\_VS\_MYELOID\_DN GSE10325\_CD4\_TCELL\_VS\_MYELOID\_DN  
151 -0.2541007 -1.0585505 0.33078393  
0.41192898 1 2593 "tags=26%, list=18%, signal=32%"  
GSE6269\_HEALTHY\_VS\_E\_COLI\_INF\_PBMC\_DN  
GSE6269\_HEALTHY\_VS\_E\_COLI\_INF\_PBMC\_DN  
119 -0.26535845 -1.058163 0.32827324

0.4126521 1 1461 "tags=16%, list=10%, signal=18%"  
GSE6259\_33D1\_POS\_DC\_VS\_BCELL\_UP GSE6259\_33D1\_POS\_DC\_VS\_BCELL\_UP  
118 -0.26669416 -1.0578796 0.3276515  
0.41310883 1 4083 "tags=39%, list=29%, signal=54%"  
GSE11057\_PBMC\_VS\_MEM\_CD4\_TCELL\_DN GSE11057\_PBMC\_VS\_MEM\_CD4\_TCELL\_DN  
131 -0.26170304 -1.057173 0.31176472  
0.41466326 1 1310 "tags=16%, list=9%, signal=18%"  
GSE37534\_GW1929\_VS\_PIOGLITAZONE\_TREATED\_CD4\_TCELL\_PPARG1\_FOXP3\_TRANS  
DUCED\_UP  
GSE37534\_GW1929\_VS\_PIOGLITAZONE\_TREATED\_CD4\_TCELL\_PPARG1\_FOXP3\_TRANS  
DUCED\_UP 130 -0.2611438 -1.0568303  
0.34108528 0.41527426 1 1557 "tags=18%,  
list=11%, signal=21%"  
GSE45365\_NK\_CELL\_VS\_CD8\_TCELL\_MCMV\_INFECTION\_DN  
GSE45365\_NK\_CELL\_VS\_CD8\_TCELL\_MCMV\_INFECTION\_DN  
145 -0.25606993 -1.0566474 0.3273453  
0.4154983 1 2867 "tags=30%, list=20%, signal=38%"  
GSE26488\_HDAC7\_KO\_VS\_VP16\_TRANSGENIC\_HDAC7\_KO\_DOUBLE\_POSITIVE\_THYMOC  
YTE\_UP  
GSE26488\_HDAC7\_KO\_VS\_VP16\_TRANSGENIC\_HDAC7\_KO\_DOUBLE\_POSITIVE\_THYMOC  
YTE\_UP 110 -0.26793072 -1.0565516  
0.33462283 0.41548285 1 2124 "tags=18%,  
list=15%, signal=21%"  
GSE24634\_IL4\_VS\_CTRL\_TREATED\_NAIVE\_CD4\_TCELL\_DAY5\_UP  
GSE24634\_IL4\_VS\_CTRL\_TREATED\_NAIVE\_CD4\_TCELL\_DAY5\_UP  
152 -0.25398296 -1.0554205 0.32588455  
0.41806054 1 2180 "tags=24%, list=15%, signal=28%"  
GSE17721\_POLYIC\_VS\_GARDIQUIMOD\_2H\_BMDC\_UP  
GSE17721\_POLYIC\_VS\_GARDIQUIMOD\_2H\_BMDC\_UP  
147 -0.25438145 -1.0538349 0.31261426  
0.42181653 1 2629 "tags=24%, list=19%, signal=30%"  
GSE12963\_UNINF\_VS\_ENV\_AND\_NEF\_AND\_VPR\_DEFICIENT\_HIV1\_INF\_CD4\_TCELL\_U  
P  
GSE12963\_UNINF\_VS\_ENV\_AND\_NEF\_AND\_VPR\_DEFICIENT\_HIV1\_INF\_CD4\_TCELL\_U  
P 102 -0.27184895 -1.0531713  
0.35977858 0.4232116 1 3425 "tags=29%,  
list=24%, signal=39%"  
GSE23321\_CENTRAL\_VS\_EFFECTOR\_MEMORY\_CD8\_TCELL\_DN  
GSE23321\_CENTRAL\_VS\_EFFECTOR\_MEMORY\_CD8\_TCELL\_DN  
143 -0.2577572 -1.0530596 0.33638024  
0.42325044 1 1142 "tags=15%, list=8%, signal=17%"  
GSE24292\_WT\_VS\_PPARG\_KO\_MACROPHAGE\_DN  
GSE24292\_WT\_VS\_PPARG\_KO\_MACROPHAGE\_DN  
147 -0.25288913 -1.0530463 0.33205375  
0.4230298 1 1998 "tags=20%, list=14%, signal=24%"  
GSE40274\_CTRL\_VS\_SATB1\_TRANSDUCE\_ACTIVATED\_CD4\_TCELL\_DN  
GSE40274\_CTRL\_VS\_SATB1\_TRANSDUCE\_ACTIVATED\_CD4\_TCELL\_DN  
135 -0.25629053 -1.052727 0.34808853  
0.42359224 1 2292 "tags=24%, list=16%, signal=29%"  
GSE13493\_DP\_VS\_CD8POS\_THYMOCYTE\_UP  
GSE13493\_DP\_VS\_CD8POS\_THYMOCYTE\_UP  
137 -0.25593445 -1.0526417 0.33723196  
0.42357454 1 1537 "tags=16%, list=11%, signal=18%"  
GSE9006\_HEALTHY\_VS\_TYPE\_1\_DIABETES\_PBMC\_4MONTH\_POST\_DX\_DN

GSE9006\_HEALTHY\_VS\_TYPE\_1\_DIABETES\_PBMC\_4MONTH\_POST\_DX\_DN  
127 -0.26063025 -1.0524876 0.33707866  
0.4237143 1 1536 "tags=14%, list=11%, signal=16%"  
GSE28737\_WT\_VS\_BCL6\_HET\_MARGINAL\_ZONE\_BCELL\_UP  
GSE28737\_WT\_VS\_BCL6\_HET\_MARGINAL\_ZONE\_BCELL\_UP  
134 -0.25551817 -1.051784 0.33333334 0.425258  
1 2591 "tags=22%, list=18%, signal=26%"  
GSE9037\_WT\_VS\_IRAK4\_KO\_LPS\_4H\_STIM\_BMDM\_UP  
GSE9037\_WT\_VS\_IRAK4\_KO\_LPS\_4H\_STIM\_BMDM\_UP  
148 -0.25427723 -1.0517602 0.32854208  
0.42507228 1 1641 "tags=16%, list=12%, signal=17%"  
GSE12198\_CTRL\_VS\_HIGH\_IL2\_STIM\_NK\_CELL\_UP  
GSE12198\_CTRL\_VS\_HIGH\_IL2\_STIM\_NK\_CELL\_UP  
157 -0.25133577 -1.0516806 0.33918127  
0.42503628 1 885 "tags=13%, list=6%, signal=14%"  
GSE22611\_MUTANT\_NOD2\_VS\_CTRL\_TRANSDUCE\_HEK293T\_CELL\_UP  
GSE22611\_MUTANT\_NOD2\_VS\_CTRL\_TRANSDUCE\_HEK293T\_CELL\_UP  
130 -0.26025027 -1.0513572 0.33776093  
0.42561984 1 2117 "tags=21%, list=15%, signal=24%"  
GSE45365\_CD8A\_DC\_VS\_CD11B\_DC\_IFNAR\_KO\_UP  
GSE45365\_CD8A\_DC\_VS\_CD11B\_DC\_IFNAR\_KO\_UP  
123 -0.2597329 -1.0509331 0.34008098  
0.4264395 1 2915 "tags=24%, list=21%, signal=30%"  
GSE4748\_CYANOBACTERIUM\_LPSLIKE\_VS\_LPS\_AND\_CYANOBACTERIUM\_LPSLIKE\_STI  
M\_DC\_3H\_UP  
GSE4748\_CYANOBACTERIUM\_LPSLIKE\_VS\_LPS\_AND\_CYANOBACTERIUM\_LPSLIKE\_STI  
M\_DC\_3H\_UP  
121 -0.26387328 -1.0508406  
0.36363637 0.4264035 1 2439 "tags=24%,  
list=17%, signal=29%"  
GSE360\_CTRL\_VS\_B\_MALAYI\_HIGH\_DOSE\_DC\_DN  
GSE360\_CTRL\_VS\_B\_MALAYI\_HIGH\_DOSE\_DC\_DN  
148 -0.25538585 -1.0504636 0.34022558  
0.42711523 1 2237 "tags=21%, list=16%, signal=25%"  
GSE37301\_LYMPHOID\_PRIMED\_MPP\_VS\_CD4\_TCELL\_UP  
GSE37301\_LYMPHOID\_PRIMED\_MPP\_VS\_CD4\_TCELL\_UP  
129 -0.25949338 -1.0503228 0.33898306  
0.42721486 1 2614 "tags=22%, list=19%, signal=26%"  
GSE13229\_MATURE\_VS\_INTMATURE\_NKCELL\_DN  
GSE13229\_MATURE\_VS\_INTMATURE\_NKCELL\_DN  
139 -0.25418612 -1.0494707 0.3425926  
0.4291971 1 2493 "tags=24%, list=18%, signal=29%"  
GSE360\_CTRL\_VS\_L\_DONOVANI\_DC\_DN GSE360\_CTRL\_VS\_L\_DONOVANI\_DC\_DN  
154 -0.2501317 -1.0491263 0.33461538  
0.42984942 1 3051 "tags=28%, list=22%, signal=35%"  
GSE23505\_IL6\_IL1\_IL23\_VS\_IL6\_IL1\_TGFB\_TREATED\_CD4\_TCELL\_UP  
GSE23505\_IL6\_IL1\_IL23\_VS\_IL6\_IL1\_TGFB\_TREATED\_CD4\_TCELL\_UP  
159 -0.25350893 -1.0485314 0.33333334  
0.4310741 1 2230 "tags=21%, list=16%, signal=25%"  
GSE37319\_WT\_VS\_RC3H1\_KO\_CD44LOW\_CD8\_TCELL\_UP  
GSE37319\_WT\_VS\_RC3H1\_KO\_CD44LOW\_CD8\_TCELL\_UP  
104 -0.26666027 -1.0481877 0.3529412  
0.43171126 1 2378 "tags=24%, list=17%, signal=29%"  
GSE12198\_CTRL\_VS\_LOW\_IL2\_STIM\_NK\_CELL\_UP  
GSE12198\_CTRL\_VS\_LOW\_IL2\_STIM\_NK\_CELL\_UP

141 -0.25541282 -1.0480876 0.3452381  
0.43171817 1 2537 "tags=26%, list=18%, signal=32%"  
GSE12845\_NAIVE\_VS\_PRE\_GC\_TONSIL\_BCELL\_UP  
GSE12845\_NAIVE\_VS\_PRE\_GC\_TONSIL\_BCELL\_UP  
124 -0.25818872 -1.0479901 0.35963303  
0.43169743 1 2971 "tags=27%, list=21%, signal=34%"  
GSE8835\_HEALTHY\_VS\_CLL\_CD4\_TCELL\_UP  
GSE8835\_HEALTHY\_VS\_CLL\_CD4\_TCELL\_UP  
142 -0.25592563 -1.0477298 0.34264433  
0.43216535 1 2292 "tags=20%, list=16%, signal=24%"  
GSE21360\_NAIVE\_VS\_PRIMARY\_MEMORY\_CD8\_TCELL\_UP  
GSE21360\_NAIVE\_VS\_PRIMARY\_MEMORY\_CD8\_TCELL\_UP  
142 -0.25762415 -1.0476775 0.35188866  
0.43203554 1 2838 "tags=30%, list=20%, signal=37%"  
GSE1566\_WT\_VS\_EZH2\_KO\_LN\_TCELL\_DN GSE1566\_WT\_VS\_EZH2\_KO\_LN\_TCELL\_DN  
116 -0.26278308 -1.047154 0.3444882  
0.4331032 1 2414 "tags=21%, list=17%, signal=25%"  
GSE19888\_CTRL\_VS\_TCELL\_MEMBRANES\_ACT\_MAST\_CELL\_PRETREAT\_A3R\_INH\_UP  
GSE19888\_CTRL\_VS\_TCELL\_MEMBRANES\_ACT\_MAST\_CELL\_PRETREAT\_A3R\_INH\_UP  
152 -0.25274995 -1.0469124 0.34637964  
0.43348274 1 4129 "tags=34%, list=29%, signal=48%"  
GSE43955\_TH0\_VS\_TGFB\_IL6\_TH17\_ACT\_CD4\_TCELL\_1H\_DN  
GSE43955\_TH0\_VS\_TGFB\_IL6\_TH17\_ACT\_CD4\_TCELL\_1H\_DN  
164 -0.2459965 -1.0462326 0.3705104  
0.43496805 1 2713 "tags=20%, list=19%, signal=25%"  
GSE19888\_ADENOSINE\_A3R\_INH\_VS\_ACT\_IN\_MAST\_CELL\_DN  
GSE19888\_ADENOSINE\_A3R\_INH\_VS\_ACT\_IN\_MAST\_CELL\_DN  
127 -0.25739115 -1.0457736 0.3358349  
0.43586284 1 2398 "tags=24%, list=17%, signal=28%"  
GSE8868\_SPLEEN\_VS\_INTESTINE\_CD11B\_POS\_CD11C\_NEG\_DC\_DN  
GSE8868\_SPLEEN\_VS\_INTESTINE\_CD11B\_POS\_CD11C\_NEG\_DC\_DN  
145 -0.25274923 -1.0454988 0.3403846  
0.43630612 1 1986 "tags=20%, list=14%, signal=23%"  
GSE34156\_NOD2\_LIGAND\_VS\_TLR1\_TLR2\_LIGAND\_6H\_TREATED\_MONOCYTE\_UP  
GSE34156\_NOD2\_LIGAND\_VS\_TLR1\_TLR2\_LIGAND\_6H\_TREATED\_MONOCYTE\_UP  
164 -0.24947548 -1.0449855 0.3612663  
0.43743286 1 2487 "tags=24%, list=18%, signal=29%"  
GSE12845\_IGD\_POS\_BLOOD\_VS\_PRE\_GC\_TONSIL\_BCELL\_UP  
GSE12845\_IGD\_POS\_BLOOD\_VS\_PRE\_GC\_TONSIL\_BCELL\_UP  
132 -0.25506628 -1.0445565 0.36960602  
0.43831685 1 2138 "tags=19%, list=15%, signal=22%"  
GSE28737\_WT\_VS\_BCL6\_KO\_FOLLICULAR\_BCELL\_UP  
GSE28737\_WT\_VS\_BCL6\_KO\_FOLLICULAR\_BCELL\_UP  
143 -0.250565 -1.04451 0.3576779 0.438184 1  
3305 "tags=30%, list=23%, signal=39%"  
GSE21380\_TFH\_VS\_GERMINAL\_CENTER\_TFH\_CD4\_TCELL\_UP  
GSE21380\_TFH\_VS\_GERMINAL\_CENTER\_TFH\_CD4\_TCELL\_UP  
150 -0.25025478 -1.0442197 0.31976745  
0.43865925 1 4463 "tags=34%, list=32%, signal=49%"  
GSE20500\_RETINOIC\_ACID\_VS\_RARA\_ANTAGONIST\_TREATED\_CD4\_TCELL\_DN  
GSE20500\_RETINOIC\_ACID\_VS\_RARA\_ANTAGONIST\_TREATED\_CD4\_TCELL\_DN  
144 -0.25395137 -1.0434983 0.33458647  
0.4402664 1 2480 "tags=24%, list=18%, signal=29%"  
GSE11961\_MEMORY\_BCELL\_DAY40\_VS\_GERMINAL\_CENTER\_BCELL\_DAY40\_UP

GSE11961\_MEMORY\_BCELL\_DAY40\_VS\_GERMINAL\_CENTER\_BCELL\_DAY40\_UP  
137 -0.25456464 -1.0434031 0.34387353  
0.44025344 1 2299 "tags=21%, list=16%, signal=25%"  
GSE15624\_CTRL\_VS\_3H\_HALOFUGINONE\_TREATED\_CD4\_TCELL\_UP  
GSE15624\_CTRL\_VS\_3H\_HALOFUGINONE\_TREATED\_CD4\_TCELL\_UP  
130 -0.2583256 -1.0428182 0.3653846  
0.44153783 1 2377 "tags=25%, list=17%, signal=30%"  
GSE29615\_CTRL\_VS\_LAIV\_FLU\_VACCINE\_PBMC\_DN  
GSE29615\_CTRL\_VS\_LAIV\_FLU\_VACCINE\_PBMC\_DN  
90 -0.27393547 -1.0423194 0.37449393  
0.4425211 1 4259 "tags=36%, list=30%, signal=51%"  
GSE9006\_TYPE\_1\_VS\_TYPE\_2\_DIABETES\_PBMC\_AT\_DX\_DN  
GSE9006\_TYPE\_1\_VS\_TYPE\_2\_DIABETES\_PBMC\_AT\_DX\_DN  
143 -0.25251183 -1.0421293 0.39034206  
0.4427357 1 2169 "tags=22%, list=15%, signal=26%"  
GSE16522\_ANTI\_CD3CD28\_STIM\_VS\_UNSTIM\_NAIVE\_CD8\_TCELL\_UP  
GSE16522\_ANTI\_CD3CD28\_STIM\_VS\_UNSTIM\_NAIVE\_CD8\_TCELL\_UP  
145 -0.25622502 -1.042039 0.34095237  
0.4426986 1 1999 "tags=17%, list=14%, signal=20%"  
GSE2706\_UNSTIM\_VS\_2H\_R848\_DC\_UP GSE2706\_UNSTIM\_VS\_2H\_R848\_DC\_UP  
113 -0.2669008 -1.0414833 0.35882354  
0.44388828 1 3639 "tags=38%, list=26%, signal=51%"  
GSE17721\_CTRL\_VS\_CPG\_24H\_BMDC\_UP GSE17721\_CTRL\_VS\_CPG\_24H\_BMDC\_UP  
154 -0.24794734 -1.0414485 0.33901516  
0.44372904 1 2886 "tags=27%, list=20%, signal=33%"  
GSE45365\_WT\_VS\_IFNAR\_KO\_CD8A\_DC\_DN  
GSE45365\_WT\_VS\_IFNAR\_KO\_CD8A\_DC\_DN  
146 -0.24879545 -1.0411959 0.3618182  
0.44411346 1 2081 "tags=21%, list=15%, signal=25%"  
GSE25088\_ROSIGLITAZONE\_VS\_IL4\_AND\_ROSIGLITAZONE\_STIM\_MACROPHAGE\_DAY1  
0\_UP  
GSE25088\_ROSIGLITAZONE\_VS\_IL4\_AND\_ROSIGLITAZONE\_STIM\_MACROPHAGE\_DAY1  
0\_UP  
133 -0.25683218 -1.0407429  
0.3544776 0.4450318 1 1725 "tags=20%,  
list=12%, signal=22%"  
GSE27859\_CD11C\_INT\_F480\_HI\_MACROPHAGE\_VS\_CD11C\_ING\_F480\_INT\_DC\_DN  
GSE27859\_CD11C\_INT\_F480\_HI\_MACROPHAGE\_VS\_CD11C\_ING\_F480\_INT\_DC\_DN  
162 -0.247793 -1.0401951 0.3507014  
0.44620296 1 1980 "tags=21%, list=14%, signal=24%"  
GSE21774\_CD56\_BRIGHT\_VS\_DIM\_CD62L\_POSITIVE\_NK\_CELL\_UP  
GSE21774\_CD56\_BRIGHT\_VS\_DIM\_CD62L\_POSITIVE\_NK\_CELL\_UP  
154 -0.25219244 -1.0399923 0.35700196  
0.44645983 1 2121 "tags=18%, list=15%, signal=20%"  
GSE360\_T\_GONDII\_VS\_M\_TUBERCULOSIS\_DC\_UP  
GSE360\_T\_GONDII\_VS\_M\_TUBERCULOSIS\_DC\_UP  
143 -0.25355864 -1.0399703 0.3761468  
0.4462546 1 3351 "tags=29%, list=24%, signal=38%"  
GSE13762\_CTRL\_VS\_125\_VITAMIND\_DAY12\_DC\_UP  
GSE13762\_CTRL\_VS\_125\_VITAMIND\_DAY12\_DC\_UP  
107 -0.26367235 -1.0398718 0.3572744  
0.44624123 1 1874 "tags=17%, list=13%, signal=19%"  
GSE3982\_CTRL\_VS\_LPS\_1H\_NEUTROPHIL\_UP  
GSE3982\_CTRL\_VS\_LPS\_1H\_NEUTROPHIL\_UP  
132 -0.2543679 -1.038705 0.33951762

0.44901633 1 2503 "tags=27%, list=18%, signal=33%"  
GSE37532\_VISCERAL\_ADIPOSE\_TISSUE\_VS\_LN\_DERIVED\_TREG\_CD4\_TCELL\_UP  
GSE37532\_VISCERAL\_ADIPOSE\_TISSUE\_VS\_LN\_DERIVED\_TREG\_CD4\_TCELL\_UP  
129 -0.2620995 -1.0381607 0.3693182  
0.45018473 1 1906 "tags=21%, list=14%, signal=24%"  
GSE22886\_NAIVE\_CD4\_TCELL\_VS\_12H\_ACT\_TH2\_UP  
GSE22886\_NAIVE\_CD4\_TCELL\_VS\_12H\_ACT\_TH2\_UP  
129 -0.25765583 -1.0380374 0.37148216  
0.45022398 1 1719 "tags=16%, list=12%, signal=17%"  
GSE6259\_FLT3L\_INDUCED\_VS\_WT\_SPLENIC\_DC\_33D1\_POS\_UP  
GSE6259\_FLT3L\_INDUCED\_VS\_WT\_SPLENIC\_DC\_33D1\_POS\_UP  
136 -0.25618798 -1.0377066 0.3457249  
0.45084843 1 2163 "tags=23%, list=15%, signal=27%"  
GSE13887\_ACT\_CD4\_VS\_NO\_TREATED\_CD4\_TCELL\_UP  
GSE13887\_ACT\_CD4\_VS\_NO\_TREATED\_CD4\_TCELL\_UP  
89 -0.26771572 -1.0375776 0.3824092  
0.45091575 1 7398 "tags=57%, list=52%, signal=120%"  
GSE36009\_WT\_VS\_NLRP10\_KO\_DC\_LPS\_STIM\_DN  
GSE36009\_WT\_VS\_NLRP10\_KO\_DC\_LPS\_STIM\_DN  
136 -0.2549014 -1.0373535 0.36213234  
0.45122644 1 2005 "tags=16%, list=14%, signal=19%"  
GSE25088\_WT\_VS\_STAT6\_KO\_MACROPHAGE\_ROSIGLITAZONE\_AND\_IL4\_STIM\_DN  
GSE25088\_WT\_VS\_STAT6\_KO\_MACROPHAGE\_ROSIGLITAZONE\_AND\_IL4\_STIM\_DN  
135 -0.2568044 -1.0366402 0.38  
0.45288804 1 1074 "tags=13%, list=8%, signal=13%"  
GSE10239\_MEMORY\_VS\_KLRG1HIGH\_EFF\_CD8\_TCELL\_UP  
GSE10239\_MEMORY\_VS\_KLRG1HIGH\_EFF\_CD8\_TCELL\_UP  
138 -0.2571423 -1.0364915 0.3548387  
0.45301595 1 3181 "tags=25%, list=23%, signal=32%"  
GSE20198\_UNTREATED\_VS\_IFNA\_TREATED\_ACT\_CD4\_TCELL\_UP  
GSE20198\_UNTREATED\_VS\_IFNA\_TREATED\_ACT\_CD4\_TCELL\_UP  
141 -0.25269628 -1.0357755 0.378119 0.45465738  
1 2856 "tags=25%, list=20%, signal=31%"  
GSE37532\_WT\_VS\_PPARG\_KO\_LN\_TREG\_UP  
GSE37532\_WT\_VS\_PPARG\_KO\_LN\_TREG\_UP  
141 -0.2540541 -1.035354 0.35440612  
0.45550114 1 2022 "tags=21%, list=14%, signal=25%"  
GSE9316\_IL6\_KO\_VS\_IFNG\_KO\_INVIVO\_EXPANDED\_CD4\_TCELL\_UP  
GSE9316\_IL6\_KO\_VS\_IFNG\_KO\_INVIVO\_EXPANDED\_CD4\_TCELL\_UP  
160 -0.25063795 -1.0352305 0.3824092  
0.45557177 1 1147 "tags=13%, list=8%, signal=14%"  
GSE17721\_POLYIC\_VS\_GARDIQUIMOD\_2H\_BMDC\_DN  
GSE17721\_POLYIC\_VS\_GARDIQUIMOD\_2H\_BMDC\_DN  
158 -0.24622785 -1.0351475 0.36501902  
0.45551768 1 1426 "tags=15%, list=10%, signal=17%"  
GSE46242\_CTRL\_VS\_EGR2\_DELETED\_ANERGIC\_TH1\_CD4\_TCELL\_DN  
GSE46242\_CTRL\_VS\_EGR2\_DELETED\_ANERGIC\_TH1\_CD4\_TCELL\_DN  
144 -0.25215006 -1.0347927 0.37159532  
0.4561646 1 2911 "tags=31%, list=21%, signal=38%"  
GSE26928\_NAIVE\_VS\_EFF\_MEMORY\_CD4\_TCELL\_DN  
GSE26928\_NAIVE\_VS\_EFF\_MEMORY\_CD4\_TCELL\_DN  
137 -0.25355604 -1.0347359 0.37310606  
0.4560628 1 1806 "tags=21%, list=13%, signal=24%"  
GSE19401\_PLN\_VS\_PEYERS\_PATCH\_FOLLICULAR\_DC\_UP



GSE19401\_PLN\_VS\_PEYERS\_PATCH\_FOLLICULAR\_DC\_UP  
136 -0.25141746 -1.034607 0.36363637 0.456132  
1 2335 "tags=21%, list=17%, signal=25%"  
GSE43955\_TH0\_VS\_TGFB\_IL6\_TH17\_ACT\_CD4\_TCELL\_52H\_DN  
GSE43955\_TH0\_VS\_TGFB\_IL6\_TH17\_ACT\_CD4\_TCELL\_52H\_DN  
158 -0.24808842 -1.0341362 0.36007828  
0.45712987 1 2106 "tags=16%, list=15%, signal=18%"  
GSE12707\_AT16L1\_HYPOMORPH\_VS\_WT\_THYMUS\_UP  
GSE12707\_AT16L1\_HYPOMORPH\_VS\_WT\_THYMUS\_UP  
100 -0.26391032 -1.0338868 0.39499035  
0.4575346 1 2861 "tags=27%, list=20%, signal=34%"  
GSE25123\_CTRL\_VS\_ROSIGLITAZONE\_STIM\_PPARG\_KO\_MACROPHAGE\_UP  
GSE25123\_CTRL\_VS\_ROSIGLITAZONE\_STIM\_PPARG\_KO\_MACROPHAGE\_UP  
134 -0.2549452 -1.0334513 0.36783734  
0.45843497 1 1744 "tags=20%, list=12%, signal=23%"  
GSE22886\_DAY0\_VS\_DAY1\_MONOCYTE\_IN\_CULTURE\_UP  
GSE22886\_DAY0\_VS\_DAY1\_MONOCYTE\_IN\_CULTURE\_UP  
136 -0.25181744 -1.0333451 0.3976143  
0.45844558 1 2570 "tags=23%, list=18%, signal=28%"  
GSE21379\_WT\_VS\_SAP\_KO\_TFH\_CD4\_TCELL\_UP  
GSE21379\_WT\_VS\_SAP\_KO\_TFH\_CD4\_TCELL\_UP  
161 -0.24453369 -1.0329651 0.36278194  
0.45923096 1 3159 "tags=22%, list=22%, signal=28%"  
GSE23114\_PERITONEAL\_CAVITY\_B1A\_BCELL\_VS\_SPLEEN\_BCELL\_UP  
GSE23114\_PERITONEAL\_CAVITY\_B1A\_BCELL\_VS\_SPLEEN\_BCELL\_UP  
119 -0.25887844 -1.0329262 0.38619402  
0.45907044 1 1279 "tags=14%, list=9%, signal=16%"  
GSE21033\_3H\_VS\_24H\_POLYIC\_STIM\_DC\_UP  
GSE21033\_3H\_VS\_24H\_POLYIC\_STIM\_DC\_UP  
121 -0.25905877 -1.0326369 0.3778626  
0.45956802 1 2859 "tags=27%, list=20%, signal=34%"  
GSE29618\_PRE\_VS\_DAY7\_FLU\_VACCINE\_MONOCYTE\_UP  
GSE29618\_PRE\_VS\_DAY7\_FLU\_VACCINE\_MONOCYTE\_UP  
122 -0.25743723 -1.0324895 0.38919926  
0.45969653 1 3490 "tags=30%, list=25%, signal=39%"  
GSE5542\_UNTREATED\_VS\_IFNA\_AND\_IFNG\_TREATED\_EPITHELIAL\_CELLS\_6H\_UP  
GSE5542\_UNTREATED\_VS\_IFNA\_AND\_IFNG\_TREATED\_EPITHELIAL\_CELLS\_6H\_UP  
122 -0.25638086 -1.0321497 0.35823753  
0.4603243 1 3210 "tags=34%, list=23%, signal=43%"  
GSE22443\_NAIVE\_VS\_ACT\_AND\_IL2\_TREATED\_CD8\_TCELL\_UP  
GSE22443\_NAIVE\_VS\_ACT\_AND\_IL2\_TREATED\_CD8\_TCELL\_UP  
164 -0.24577738 -1.0320916 0.3605948  
0.46022302 1 4638 "tags=37%, list=33%, signal=55%"  
GSE15930\_STIM\_VS\_STIM\_AND\_TRICHOSTATINA\_48H\_CD8\_T\_CELL\_DN  
GSE15930\_STIM\_VS\_STIM\_AND\_TRICHOSTATINA\_48H\_CD8\_T\_CELL\_DN  
151 -0.2466399 -1.0320461 0.37236086  
0.4600852 1 1724 "tags=17%, list=12%, signal=19%"  
GSE9960\_HEALTHY\_VS\_GRAM\_NEG\_AND\_POS\_SEPSIS\_PBMC\_UP  
GSE9960\_HEALTHY\_VS\_GRAM\_NEG\_AND\_POS\_SEPSIS\_PBMC\_UP  
115 -0.25753102 -1.0308005 0.36960602  
0.46313286 1 2187 "tags=18%, list=15%, signal=21%"  
GSE36392\_TYPE\_2\_MYELOID\_VS\_NEUTROPHIL\_IL25\_TREATED\_LUNG\_UP  
GSE36392\_TYPE\_2\_MYELOID\_VS\_NEUTROPHIL\_IL25\_TREATED\_LUNG\_UP  
151 -0.24757347 -1.0307443 0.36923078

0.4630061 1 2475 "tags=26%, list=18%, signal=32%"  
GSE24634\_IL4\_VS\_CTRL\_TREATED\_NAIVE\_CD4\_TCELL\_DAY3\_UP  
GSE24634\_IL4\_VS\_CTRL\_TREATED\_NAIVE\_CD4\_TCELL\_DAY3\_UP  
152 -0.24813089 -1.0299789 0.36734694  
0.4647309 1 742 "tags=13%, list=5%, signal=13%"  
GSE20366\_CD103\_POS\_VS\_CD103\_KLRG1\_DP\_TREG\_DN  
GSE20366\_CD103\_POS\_VS\_CD103\_KLRG1\_DP\_TREG\_DN  
152 -0.24695003 -1.0299287 0.37200737  
0.4645918 1 1561 "tags=17%, list=11%, signal=19%"  
GSE22443\_IL2\_VS\_IL12\_TREATED\_ACT\_CD8\_TCELL\_UP  
GSE22443\_IL2\_VS\_IL12\_TREATED\_ACT\_CD8\_TCELL\_UP  
148 -0.24861062 -1.0292966 0.37545788  
0.46601912 1 4162 "tags=34%, list=29%, signal=47%"  
GSE43955\_TH0\_VS\_TGFB\_IL6\_TH17\_ACT\_CD4\_TCELL\_30H\_DN  
GSE43955\_TH0\_VS\_TGFB\_IL6\_TH17\_ACT\_CD4\_TCELL\_30H\_DN  
151 -0.24653152 -1.0290852 0.3752345  
0.4662674 1 1867 "tags=19%, list=13%, signal=21%"  
GSE45365\_HEALTHY\_VS\_MCMV\_INFECTION\_CD8A\_DC\_IFNAR\_KO\_DN  
GSE45365\_HEALTHY\_VS\_MCMV\_INFECTION\_CD8A\_DC\_IFNAR\_KO\_DN  
148 -0.24840729 -1.02857 0.3775322 0.46736202  
1 1724 "tags=18%, list=12%, signal=20%"  
GSE21927\_C26GM\_VS\_4T1\_TUMOR\_MONOCYTE\_BALBC\_DN  
GSE21927\_C26GM\_VS\_4T1\_TUMOR\_MONOCYTE\_BALBC\_DN  
130 -0.2530298 -1.0283891 0.4173077  
0.46756274 1 1471 "tags=17%, list=10%, signal=19%"  
GSE16385\_IFNG\_TNF\_VS\_IL4\_STIM\_MACROPHAGE\_ROSIGLITAZONE\_TREATED\_UP  
GSE16385\_IFNG\_TNF\_VS\_IL4\_STIM\_MACROPHAGE\_ROSIGLITAZONE\_TREATED\_UP  
118 -0.25612217 -1.0282938 0.3776091  
0.46756393 1 1299 "tags=14%, list=9%, signal=16%"  
GSE17974\_IL4\_AND\_ANTI\_IL12\_VS\_UNTREATED\_6H\_ACT\_CD4\_TCELL\_UP  
GSE17974\_IL4\_AND\_ANTI\_IL12\_VS\_UNTREATED\_6H\_ACT\_CD4\_TCELL\_UP  
115 -0.2584172 -1.0281653 0.38519925  
0.46763387 1 3180 "tags=25%, list=23%, signal=32%"  
GSE3982\_CENT\_MEMORY\_CD4\_TCELL\_VS\_TH1\_UP  
GSE3982\_CENT\_MEMORY\_CD4\_TCELL\_VS\_TH1\_UP  
129 -0.24907605 -1.0279324 0.4163424  
0.46799403 1 1179 "tags=15%, list=8%, signal=16%"  
GSE24574\_BCL6\_LOW\_TFH\_VS\_NAIVE\_CD4\_TCELL\_DN  
GSE24574\_BCL6\_LOW\_TFH\_VS\_NAIVE\_CD4\_TCELL\_DN  
139 -0.25121486 -1.0278374 0.3901515  
0.46797925 1 1875 "tags=19%, list=13%, signal=22%"  
GSE21379\_TFH\_VS\_NON\_TFH\_CD4\_TCELL\_UP  
GSE21379\_TFH\_VS\_NON\_TFH\_CD4\_TCELL\_UP  
140 -0.25103056 -1.0268734 0.3877551  
0.4702673 1 2167 "tags=19%, list=15%, signal=23%"  
GSE27786\_BCELL\_VS\_MONO\_MAC\_UP GSE27786\_BCELL\_VS\_MONO\_MAC\_UP  
124 -0.25389868 -1.0267543 0.36673346  
0.47033018 1 2426 "tags=24%, list=17%, signal=29%"  
GSE2770\_TGFB\_AND\_IL4\_VS\_TGFB\_AND\_IL12\_TREATED\_ACT\_CD4\_TCELL\_48H\_UP  
GSE2770\_TGFB\_AND\_IL4\_VS\_TGFB\_AND\_IL12\_TREATED\_ACT\_CD4\_TCELL\_48H\_UP  
119 -0.25693578 -1.0253863 0.40373832  
0.47371158 1 1211 "tags=17%, list=9%, signal=18%"  
GSE30083\_SP1\_VS\_SP2\_THYMOCYTE\_UP GSE30083\_SP1\_VS\_SP2\_THYMOCYTE\_UP  
155 -0.24544336 -1.0249215 0.4043716

0.47469234 1 2261 "tags=23%, list=16%, signal=27%"  
GSE12845\_IGD\_POS\_BLOOD\_VS\_DARKZONE\_GC\_TONSIL\_BCELL\_UP  
GSE12845\_IGD\_POS\_BLOOD\_VS\_DARKZONE\_GC\_TONSIL\_BCELL\_UP  
123 -0.25675333 -1.0245559 0.38333333  
0.47540238 1 1279 "tags=15%, list=9%, signal=17%"  
GSE29618\_LAIV\_VS\_TIV\_FLU\_VACCINE\_DAY7\_BCELL\_UP  
GSE29618\_LAIV\_VS\_TIV\_FLU\_VACCINE\_DAY7\_BCELL\_UP  
130 -0.25011298 -1.0243623 0.4060721  
0.4756433 1 3064 "tags=24%, list=22%, signal=30%"  
GSE9988\_LOW\_LPS\_VS\_ANTI\_TREM1\_AND\_LPS\_MONOCYTE\_UP  
GSE9988\_LOW\_LPS\_VS\_ANTI\_TREM1\_AND\_LPS\_MONOCYTE\_UP  
144 -0.24861237 -1.024134 0.41902834  
0.4759633 1 2836 "tags=29%, list=20%, signal=36%"  
GSE25088\_CTRL\_VS\_IL4\_STIM\_MACROPHAGE\_DN  
GSE25088\_CTRL\_VS\_IL4\_STIM\_MACROPHAGE\_DN  
136 -0.251504 -1.0240623 0.41142857  
0.4758976 1 1703 "tags=15%, list=12%, signal=17%"  
GSE36527\_CD62L\_HIGH\_VS\_CD62L\_LOW\_TREG\_CD69\_NEG\_KLRG1\_NEG\_DN  
GSE36527\_CD62L\_HIGH\_VS\_CD62L\_LOW\_TREG\_CD69\_NEG\_KLRG1\_NEG\_DN  
156 -0.24489431 -1.0232649 0.40618956  
0.47770604 1 2980 "tags=27%, list=21%, signal=34%"  
GSE19772\_CTRL\_VS\_HCMV\_INF\_MONOCYTES\_AND\_PI3K\_INHIBITION\_DN  
GSE19772\_CTRL\_VS\_HCMV\_INF\_MONOCYTES\_AND\_PI3K\_INHIBITION\_DN  
157 -0.24273176 -1.0228053 0.37284896  
0.47867343 1 2371 "tags=20%, list=17%, signal=23%"  
GSE21033\_1H\_VS\_24H\_POLYIC\_STIM\_DC\_UP  
GSE21033\_1H\_VS\_24H\_POLYIC\_STIM\_DC\_UP  
126 -0.25158215 -1.0227942 0.38666666  
0.47844455 1 2307 "tags=26%, list=16%, signal=31%"  
GSE7596\_AKT\_TRANSD\_VS\_CTRL\_CD4\_TCONV\_WITH\_TGFB\_DN  
GSE7596\_AKT\_TRANSD\_VS\_CTRL\_CD4\_TCONV\_WITH\_TGFB\_DN  
89 -0.26752034 -1.022331 0.3815261 0.479418  
1 2452 "tags=19%, list=17%, signal=23%"  
GSE1112\_OT1\_CD8AB\_VS\_HY\_CD8AA\_THYMOCYTE\_RTOC\_CULTURE\_UP  
GSE1112\_OT1\_CD8AB\_VS\_HY\_CD8AA\_THYMOCYTE\_RTOC\_CULTURE\_UP  
95 -0.26360223 -1.0222957 0.39130434 0.479249  
1 816 "tags=12%, list=6%, signal=12%"  
GSE15330\_LYMPHOID\_MULTIPOTENT\_VS\_MEGAKARYOCYTE\_ERYTHROID\_PROGENITOR\_DN  
GSE15330\_LYMPHOID\_MULTIPOTENT\_VS\_MEGAKARYOCYTE\_ERYTHROID\_PROGENITOR\_DN  
157 -0.24622712 -1.0222776  
0.38963532 0.4790312 1 2454 "tags=21%,  
list=17%, signal=25%"  
GSE36891\_UNSTIM\_VS\_POLYIC\_TLR3\_STIM\_PERITONEAL\_MACROPHAGE\_DN  
GSE36891\_UNSTIM\_VS\_POLYIC\_TLR3\_STIM\_PERITONEAL\_MACROPHAGE\_DN  
148 -0.24537201 -1.0220852 0.39387757  
0.4792727 1 1797 "tags=20%, list=13%, signal=22%"  
GSE17721\_LPS\_VS\_POLYIC\_0.5H\_BMDC\_DN  
GSE17721\_LPS\_VS\_POLYIC\_0.5H\_BMDC\_DN  
163 -0.24270461 -1.0216278 0.38973385  
0.4801727 1 3606 "tags=34%, list=26%, signal=45%"  
GSE39864\_WT\_VS\_GATA3\_KO\_TREG\_UP GSE39864\_WT\_VS\_GATA3\_KO\_TREG\_UP  
157 -0.24547218 -1.0215715 0.39661655  
0.48006114 1 1717 "tags=15%, list=12%, signal=17%"

GSE14308\_NAIVE\_CD4\_TCELL\_VS\_NATURAL\_TREG\_UP  
GSE14308\_NAIVE\_CD4\_TCELL\_VS\_NATURAL\_TREG\_UP  
127 -0.2536942 -1.02153 0.43141153 0.4798905  
1 2596 "tags=20%, list=18%, signal=25%"  
GSE37301\_COMMON\_LYMPHOID\_PROGENITOR\_VS\_CD4\_TCELL\_UP  
GSE37301\_COMMON\_LYMPHOID\_PROGENITOR\_VS\_CD4\_TCELL\_UP  
142 -0.2480673 -1.0207024 0.38963532  
0.48183402 1 2179 "tags=23%, list=15%, signal=26%"  
GSE5589\_WT\_VS\_IL10\_KO\_LPS\_AND\_IL10\_STIM\_MACROPHAGE\_45MIN\_DN  
GSE5589\_WT\_VS\_IL10\_KO\_LPS\_AND\_IL10\_STIM\_MACROPHAGE\_45MIN\_DN  
141 -0.24695192 -1.0200281 0.41304347  
0.4833684 1 2479 "tags=23%, list=18%, signal=28%"  
GSE37533\_PPARG1\_FOXP3\_VS\_PPARG2\_FOXP3\_TRANSDUCECD\_CD4\_TCELL\_UP  
GSE37533\_PPARG1\_FOXP3\_VS\_PPARG2\_FOXP3\_TRANSDUCECD\_CD4\_TCELL\_UP  
131 -0.25076857 -1.0198424 0.39655173  
0.48362187 1 998 "tags=15%, list=7%, signal=15%"  
GSE39820\_TGFBETA1\_VS\_TGFBETA3\_IN\_IL6\_TREATED\_CD4\_TCELL\_UP  
GSE39820\_TGFBETA1\_VS\_TGFBETA3\_IN\_IL6\_TREATED\_CD4\_TCELL\_UP  
158 -0.24677101 -1.0193741 0.4266145  
0.4846312 1 2382 "tags=23%, list=17%, signal=27%"  
GSE7831\_1H\_VS\_4H\_CPG\_STIM\_PDC\_UP GSE7831\_1H\_VS\_4H\_CPG\_STIM\_PDC\_UP  
152 -0.24517359 -1.0190983 0.4050633  
0.48510218 1 2283 "tags=20%, list=16%, signal=23%"  
GSE5589\_LPS\_VS\_LPS\_AND\_IL10\_STIM\_MACROPHAGE\_180MIN\_DN  
GSE5589\_LPS\_VS\_LPS\_AND\_IL10\_STIM\_MACROPHAGE\_180MIN\_DN  
144 -0.24804413 -1.0181195 0.3938224  
0.48740906 1 756 "tags=12%, list=5%, signal=12%"  
GSE27859\_MACROPHAGE\_VS\_DC\_UP GSE27859\_MACROPHAGE\_VS\_DC\_UP  
137 -0.24721941 -1.017594 0.40038314  
0.48855126 1 1316 "tags=18%, list=9%, signal=19%"  
GSE27786\_CD4\_TCELL\_VS\_MONO\_MAC\_UP GSE27786\_CD4\_TCELL\_VS\_MONO\_MAC\_UP  
130 -0.24799544 -1.0170069 0.404  
0.48985305 1 2377 "tags=22%, list=17%, signal=27%"  
GSE10325\_LUPUS\_CD4\_TCELL\_VS\_LUPUS\_MYELOID\_DN  
GSE10325\_LUPUS\_CD4\_TCELL\_VS\_LUPUS\_MYELOID\_DN  
152 -0.24297826 -1.0159748 0.41291586  
0.49237016 1 1537 "tags=17%, list=11%, signal=19%"  
GSE22886\_NEUTROPHIL\_VS\_DC\_UP GSE22886\_NEUTROPHIL\_VS\_DC\_UP  
136 -0.2494004 -1.0157967 0.41523808  
0.49257988 1 1139 "tags=12%, list=8%, signal=13%"  
GSE45365\_NK\_CELL\_VS\_CD8\_TCELL\_UP GSE45365\_NK\_CELL\_VS\_CD8\_TCELL\_UP  
116 -0.25573096 -1.015577 0.42256215  
0.49294007 1 2280 "tags=23%, list=16%, signal=28%"  
GSE14769\_UNSTIM\_VS\_240MIN\_LPS\_BMDM\_DN  
GSE14769\_UNSTIM\_VS\_240MIN\_LPS\_BMDM\_DN  
154 -0.24611935 -1.015381 0.41894352  
0.49318787 1 1591 "tags=18%, list=11%, signal=20%"  
GSE25123\_IL4\_VS\_IL4\_AND\_ROSIGLITAZONE\_STIM\_PPARG\_KO\_MACROPHAGE\_DAY10\_DN  
GSE25123\_IL4\_VS\_IL4\_AND\_ROSIGLITAZONE\_STIM\_PPARG\_KO\_MACROPHAGE\_DAY10\_DN  
137 -0.24830006 -1.015301  
0.41828793 0.49311697 1 2409 "tags=23%, list=17%, signal=28%"  
GSE5099\_MONOCYTE\_VS\_ALTERNATIVE\_M2\_MACROPHAGE\_DN

GSE5099\_MONOCYTE\_VS\_ALTERNATIVE\_M2\_MACROPHAGE\_DN  
117 -0.25213075 -1.0148672 0.42264152  
0.49396926 1 1332 "tags=14%, list=9%, signal=15%"  
GSE7460\_TREG\_VS\_TCONV\_ACT\_DN GSE7460\_TREG\_VS\_TCONV\_ACT\_DN  
139 -0.24672511 -1.0147482 0.40968344  
0.49398398 1 1560 "tags=15%, list=11%, signal=17%"  
GSE3982\_BCELL\_VS\_BASOPHIL\_DN GSE3982\_BCELL\_VS\_BASOPHIL\_DN  
154 -0.24453612 -1.0144516 0.40576923  
0.4945157 1 2501 "tags=23%, list=18%, signal=28%"  
GSE3400\_UNTREATED\_VS\_IFNB\_TREATED\_MEF\_UP  
GSE3400\_UNTREATED\_VS\_IFNB\_TREATED\_MEF\_UP  
124 -0.25222045 -1.0143533 0.4124294  
0.49451306 1 2354 "tags=27%, list=17%, signal=33%"  
GSE17974\_IL4\_AND\_ANTI\_IL12\_VS\_UNTREATED\_0.5H\_ACT\_CD4\_TCELL\_DN  
GSE17974\_IL4\_AND\_ANTI\_IL12\_VS\_UNTREATED\_0.5H\_ACT\_CD4\_TCELL\_DN  
100 -0.26145518 -1.013781 0.42424244  
0.495794 1 4768 "tags=41%, list=34%, signal=61%"  
GSE43863\_TH1\_VS\_LY6C\_INT\_CXCR5POS\_MEMORY\_CD4\_TCELL\_DN  
GSE43863\_TH1\_VS\_LY6C\_INT\_CXCR5POS\_MEMORY\_CD4\_TCELL\_DN  
146 -0.24417503 -1.0132405 0.39245284  
0.4969978 1 4587 "tags=36%, list=33%, signal=52%"  
GSE14769\_40MIN\_VS\_360MIN\_LPS\_BMDM\_DN  
GSE14769\_40MIN\_VS\_360MIN\_LPS\_BMDM\_DN  
142 -0.24512 -1.0131773 0.42322835 0.4968952  
1 2249 "tags=21%, list=16%, signal=25%"  
GSE2706\_UNSTIM\_VS\_8H\_R848\_DC\_UP GSE2706\_UNSTIM\_VS\_8H\_R848\_DC\_UP  
128 -0.25042367 -1.013109 0.41505793  
0.49679086 1 3241 "tags=27%, list=23%, signal=35%"  
GSE19374\_UNINF\_VS\_LISTERIA\_INFECTED\_MACROPHAGE\_UP  
GSE19374\_UNINF\_VS\_LISTERIA\_INFECTED\_MACROPHAGE\_UP  
135 -0.25000048 -1.0129656 0.41747573  
0.49689612 1 2614 "tags=21%, list=19%, signal=25%"  
GSE14413\_UNSTIM\_VS\_IFNB\_STIM\_RAW264\_CELLS\_DN  
GSE14413\_UNSTIM\_VS\_IFNB\_STIM\_RAW264\_CELLS\_DN  
81 -0.26885635 -1.0128627 0.4512195  
0.49689204 1 7495 "tags=63%, list=53%, signal=133%"  
GSE2770\_UNTREATED\_VS\_TGFB\_AND\_IL12\_TREATED\_ACT\_CD4\_TCELL\_2H\_UP  
GSE2770\_UNTREATED\_VS\_TGFB\_AND\_IL12\_TREATED\_ACT\_CD4\_TCELL\_2H\_UP  
144 -0.24676321 -1.011692 0.4228457  
0.49979177 1 3698 "tags=28%, list=26%, signal=37%"  
GSE43863\_TH1\_VS\_TFH\_EFFECTOR\_CD4\_TCELL\_UP  
GSE43863\_TH1\_VS\_TFH\_EFFECTOR\_CD4\_TCELL\_UP  
145 -0.2427094 -1.0110345 0.4183486  
0.5012571 1 3850 "tags=32%, list=27%, signal=44%"  
GSE26928\_CENTR\_MEMORY\_VS\_CXCR5\_POS\_CD4\_TCELL\_DN  
GSE26928\_CENTR\_MEMORY\_VS\_CXCR5\_POS\_CD4\_TCELL\_DN  
113 -0.25323433 -1.0105312 0.4187867  
0.5023506 1 3064 "tags=27%, list=22%, signal=34%"  
GSE29618\_PRE\_VS\_DAY7\_POST\_LAIV\_FLU\_VACCINE\_BCELL\_UP  
GSE29618\_PRE\_VS\_DAY7\_POST\_LAIV\_FLU\_VACCINE\_BCELL\_UP  
150 -0.24194618 -1.0104624 0.41992188  
0.5022495 1 3154 "tags=27%, list=22%, signal=35%"  
GSE30083\_SP1\_VS\_SP3\_THYMOCYTE\_UP GSE30083\_SP1\_VS\_SP3\_THYMOCYTE\_UP  
152 -0.24243928 -1.0094026 0.40530303

0.504917 1 1864 "tags=17%, list=13%, signal=19%"  
GSE21063\_3H\_VS\_16H\_ANTI\_IGM\_STIM\_BCELL\_DN  
GSE21063\_3H\_VS\_16H\_ANTI\_IGM\_STIM\_BCELL\_DN  
126 -0.2501942 -1.0092192 0.43106797  
0.50512654 1 2043 "tags=21%, list=14%, signal=24%"  
GSE3982\_MAST\_CELL\_VS\_CENT\_MEMORY\_CD4\_TCELL\_DN  
GSE3982\_MAST\_CELL\_VS\_CENT\_MEMORY\_CD4\_TCELL\_DN  
135 -0.24790427 -1.0071231 0.43486974  
0.5105927 1 2740 "tags=24%, list=19%, signal=30%"  
GSE15330\_WT\_VS\_IKAROS\_KO\_GNANULOCYTE\_MONOCYTE\_PROGENITOR\_UP  
GSE15330\_WT\_VS\_IKAROS\_KO\_GNANULOCYTE\_MONOCYTE\_PROGENITOR\_UP  
152 -0.24204347 -1.0058002 0.4502924  
0.5139162 1 965 "tags=12%, list=7%, signal=13%"  
GSE25087\_TREG\_VS\_TCONV\_ADULT\_DN GSE25087\_TREG\_VS\_TCONV\_ADULT\_DN  
128 -0.25085792 -1.0037943 0.46139705  
0.51919854 1 2507 "tags=23%, list=18%, signal=27%"  
GSE17721\_CPG\_VS\_GARDIQUIMOD\_16H\_BMDC\_UP  
GSE17721\_CPG\_VS\_GARDIQUIMOD\_16H\_BMDC\_UP  
150 -0.24280442 -1.0031472 0.47504622  
0.5207165 1 2606 "tags=23%, list=18%, signal=28%"  
GSE18804\_SPLEEN\_MACROPHAGE\_VS\_COLON\_TUMORAL\_MACROPHAGE\_DN  
GSE18804\_SPLEEN\_MACROPHAGE\_VS\_COLON\_TUMORAL\_MACROPHAGE\_DN  
148 -0.24367598 -1.0029712 0.48015872  
0.5209378 1 1817 "tags=18%, list=13%, signal=21%"  
GSE41867\_NAIVE\_VS\_DAY15\_LCMV\_CONE13\_EFFECTOR\_CD8\_TCELL\_DN  
GSE41867\_NAIVE\_VS\_DAY15\_LCMV\_CONE13\_EFFECTOR\_CD8\_TCELL\_DN  
124 -0.24675809 -1.0028622 0.46022728  
0.5209618 1 1800 "tags=18%, list=13%, signal=20%"  
GSE29618\_PRE\_VS\_DAY7\_POST\_LAIV\_FLU\_VACCINE\_MDC\_UP  
GSE29618\_PRE\_VS\_DAY7\_POST\_LAIV\_FLU\_VACCINE\_MDC\_UP  
134 -0.2459861 -1.0027094 0.46626985  
0.52108085 1 1841 "tags=15%, list=13%, signal=17%"  
GSE46606\_IRF4HIGH\_VS\_IRF4MID\_CD40L\_IL2\_IL5\_DAY1\_STIMULATED\_BCELL\_UP  
GSE46606\_IRF4HIGH\_VS\_IRF4MID\_CD40L\_IL2\_IL5\_DAY1\_STIMULATED\_BCELL\_UP  
153 -0.24214627 -1.0026991 0.4402985  
0.5208217 1 2518 "tags=26%, list=18%, signal=31%"  
GSE28737\_WT\_VS\_BCL6\_HET\_FOLLICULAR\_BCELL\_UP  
GSE28737\_WT\_VS\_BCL6\_HET\_FOLLICULAR\_BCELL\_UP  
143 -0.24236369 -1.0025951 0.43454546  
0.52082586 1 2648 "tags=24%, list=19%, signal=30%"  
GSE20198\_UNTREATED\_VS\_IL12\_TREATED\_ACT\_CD4\_TCELL\_DN  
GSE20198\_UNTREATED\_VS\_IL12\_TREATED\_ACT\_CD4\_TCELL\_DN  
145 -0.24217725 -1.0014327 0.44356436  
0.52378124 1 1596 "tags=18%, list=11%, signal=20%"  
GSE17721\_CTRL\_VS\_POLYIC\_4H\_BMDC\_DN  
GSE17721\_CTRL\_VS\_POLYIC\_4H\_BMDC\_DN  
145 -0.24501827 -1.0003647 0.4493927  
0.5264008 1 1855 "tags=17%, list=13%, signal=19%"  
GSE28783\_ANTI\_MIR33\_VS\_CTRL\_ATHEROSCLEROSIS\_MACROPHAGE\_DN  
GSE28783\_ANTI\_MIR33\_VS\_CTRL\_ATHEROSCLEROSIS\_MACROPHAGE\_DN  
131 -0.24638808 -0.99959224 0.44962686  
0.52825475 1 1651 "tags=16%, list=12%, signal=18%"  
GSE17721\_POLYIC\_VS\_PAM3CSK4\_1H\_BMDC\_DN  
GSE17721\_POLYIC\_VS\_PAM3CSK4\_1H\_BMDC\_DN

168 -0.23758514 -0.9995351 0.43103448  
0.52813596 1 2498 "tags=23%, list=18%, signal=28%"  
GSE21063\_WT\_VS\_NFATC1\_KO\_16H\_ANTI\_IGM\_STIM\_BCELL\_UP  
GSE21063\_WT\_VS\_NFATC1\_KO\_16H\_ANTI\_IGM\_STIM\_BCELL\_UP  
141 -0.24193181 -0.9992378 0.45057034  
0.52870244 1 2493 "tags=26%, list=18%, signal=32%"  
GSE13485\_CTRL\_VS\_DAY1\_YF17D\_VACCINE\_PBMC\_DN  
GSE13485\_CTRL\_VS\_DAY1\_YF17D\_VACCINE\_PBMC\_DN  
91 -0.2600392 -0.9992097 0.4521576  
0.52849364 1 5316 "tags=44%, list=38%, signal=70%"  
GSE21546\_SAP1A\_KO\_VS\_SAP1A\_KO\_AND\_ELK1\_KO\_DP\_THYMOCYTES\_UP  
GSE21546\_SAP1A\_KO\_VS\_SAP1A\_KO\_AND\_ELK1\_KO\_DP\_THYMOCYTES\_UP  
153 -0.2411399 -0.99912745 0.47878787  
0.52843976 1 1392 "tags=16%, list=10%, signal=18%"  
GSE5589\_WT\_VS\_IL6\_KO\_LPS\_AND\_IL10\_STIM\_MACROPHAGE\_180MIN\_DN  
GSE5589\_WT\_VS\_IL6\_KO\_LPS\_AND\_IL10\_STIM\_MACROPHAGE\_180MIN\_DN  
109 -0.25602043 -0.99756235 0.47591522  
0.53242844 1 2076 "tags=22%, list=15%, signal=26%"  
GSE37533\_UNTREATED\_VS\_PIOGLIZATONE\_TREATED\_CD4\_TCELL\_FOXP3\_TRASDUCED  
\_CD4\_TCELL\_UP  
GSE37533\_UNTREATED\_VS\_PIOGLIZATONE\_TREATED\_CD4\_TCELL\_FOXP3\_TRASDUCED  
\_CD4\_TCELL\_UP 119 -0.24757294 -0.9972763  
0.45708954 0.5329337 1 1482 "tags=13%,  
list=11%, signal=14%"  
GSE39820\_TGFBETA1\_VS\_TGFBETA3\_IN\_IL6\_IL23A\_TREATED\_CD4\_TCELL\_DN  
GSE39820\_TGFBETA1\_VS\_TGFBETA3\_IN\_IL6\_IL23A\_TREATED\_CD4\_TCELL\_DN  
139 -0.24519502 -0.9966675 0.47448015  
0.53435314 1 1841 "tags=17%, list=13%, signal=20%"  
GSE42088\_UNINF\_VS\_LEISHMANIA\_INF\_DC\_4H\_UP  
GSE42088\_UNINF\_VS\_LEISHMANIA\_INF\_DC\_4H\_UP  
159 -0.23913495 -0.9965456 0.45276293 0.534391  
1 2025 "tags=22%, list=14%, signal=25%"  
GSE15624\_CTRL\_VS\_6H\_HALOFUGINONE\_TREATED\_CD4\_TCELL\_UP  
GSE15624\_CTRL\_VS\_6H\_HALOFUGINONE\_TREATED\_CD4\_TCELL\_UP  
100 -0.2561481 -0.99646986 0.45746693  
0.53431046 1 3712 "tags=38%, list=26%, signal=51%"  
GSE46606\_UNSTIM\_VS\_CD40L\_IL2\_IL5\_3DAY\_STIMULATED\_IRF4\_KO\_BCELL\_DN  
GSE46606\_UNSTIM\_VS\_CD40L\_IL2\_IL5\_3DAY\_STIMULATED\_IRF4\_KO\_BCELL\_DN  
106 -0.25428027 -0.9961256 0.44660193  
0.5350057 1 2022 "tags=22%, list=14%, signal=25%"  
GSE10325\_BCELL\_VS\_MYELOID\_DN GSE10325\_BCELL\_VS\_MYELOID\_DN  
147 -0.2396843 -0.995204 0.46792454  
0.5372767 1 2570 "tags=26%, list=18%, signal=31%"  
GSE13411\_PLASMA\_CELL\_VS\_MEMORY\_BCELL\_DN  
GSE13411\_PLASMA\_CELL\_VS\_MEMORY\_BCELL\_DN  
134 -0.24079083 -0.9951198 0.44742268  
0.5372309 1 1578 "tags=16%, list=11%, signal=17%"  
GSE34515\_CD16\_NEG\_VS\_POS\_MONOCYTE\_DN  
GSE34515\_CD16\_NEG\_VS\_POS\_MONOCYTE\_DN  
128 -0.24420807 -0.99493086 0.46837944 0.53745  
1 1174 "tags=15%, list=8%, signal=16%"  
GSE23321\_CENTRAL\_MEMORY\_VS\_NAIVE\_CD8\_TCELL\_DN  
GSE23321\_CENTRAL\_MEMORY\_VS\_NAIVE\_CD8\_TCELL\_DN  
155 -0.23827906 -0.99452037 0.4910072

0.53831005 1 4642 "tags=34%, list=33%, signal=50%"  
GSE37563\_WT\_VS\_CTLA4\_KO\_CD4\_TCELL\_D4\_POST\_IMMUNIZATION\_UP  
GSE37563\_WT\_VS\_CTLA4\_KO\_CD4\_TCELL\_D4\_POST\_IMMUNIZATION\_UP  
125 -0.25056764 -0.99415106 0.48449612  
0.5390804 1 2899 "tags=28%, list=21%, signal=35%"  
GSE22886\_NAIVE\_CD8\_TCELL\_VS\_NEUTROPHIL\_DN  
GSE22886\_NAIVE\_CD8\_TCELL\_VS\_NEUTROPHIL\_DN  
140 -0.24009484 -0.9937694 0.47227535  
0.5397885 1 3036 "tags=26%, list=22%, signal=33%"  
GSE6259\_33D1\_POS\_VS\_DEC205\_POS\_FLT3L\_INDUCED\_SPLENIC\_DC\_DN  
GSE6259\_33D1\_POS\_VS\_DEC205\_POS\_FLT3L\_INDUCED\_SPLENIC\_DC\_DN  
143 -0.23882394 -0.9937317 0.46927375  
0.5396059 1 2751 "tags=25%, list=19%, signal=31%"  
GSE41978\_WT\_VS\_ID2\_KO\_KLRG1\_LOW\_EFFECTOR\_CD8\_TCELL\_UP  
GSE41978\_WT\_VS\_ID2\_KO\_KLRG1\_LOW\_EFFECTOR\_CD8\_TCELL\_UP  
155 -0.23941967 -0.99325883 0.46564886  
0.54064703 1 4239 "tags=32%, list=30%, signal=46%"  
GSE34156\_UNTREATED\_VS\_6H\_TLR1\_TLR2\_LIGAND\_TREATED\_MONOCYTE\_UP  
GSE34156\_UNTREATED\_VS\_6H\_TLR1\_TLR2\_LIGAND\_TREATED\_MONOCYTE\_UP  
141 -0.2402184 -0.9917872 0.4763705  
0.5444303 1 2254 "tags=21%, list=16%, signal=25%"  
GSE17721\_LPS\_VS\_PAM3CSK4\_2H\_BMDC\_UP  
GSE17721\_LPS\_VS\_PAM3CSK4\_2H\_BMDC\_UP  
164 -0.23668723 -0.9915324 0.4686347  
0.54484785 1 2424 "tags=25%, list=17%, signal=30%"  
GSE13485\_CTRL\_VS\_DAY3\_YF17D\_VACCINE\_PBMIC\_UP  
GSE13485\_CTRL\_VS\_DAY3\_YF17D\_VACCINE\_PBMIC\_UP  
108 -0.25393352 -0.9913206 0.46931407  
0.5451639 1 1631 "tags=18%, list=12%, signal=20%"  
GSE26669\_CD4\_VS\_CD8\_TCELL\_IN\_MLR\_DN  
GSE26669\_CD4\_VS\_CD8\_TCELL\_IN\_MLR\_DN  
141 -0.24342237 -0.9908216 0.48091602  
0.5463389 1 1946 "tags=18%, list=14%, signal=20%"  
GSE5589\_LPS\_AND\_IL10\_VS\_LPS\_AND\_IL6\_STIM\_IL10\_KO\_MACROPHAGE\_45MIN\_UP  
  
GSE5589\_LPS\_AND\_IL10\_VS\_LPS\_AND\_IL6\_STIM\_IL10\_KO\_MACROPHAGE\_45MIN\_UP  
149 -0.23890667 -0.99050045  
0.49712092 0.54691607 1 2248 "tags=21%,  
list=16%, signal=24%"  
GSE1925\_CTRL\_VS\_3H\_IFNG\_STIM\_IFNG\_PRIMED\_MACROPHAGE\_DN  
GSE1925\_CTRL\_VS\_3H\_IFNG\_STIM\_IFNG\_PRIMED\_MACROPHAGE\_DN  
163 -0.2367291 -0.99047947 0.47126436  
0.54668117 1 2246 "tags=21%, list=16%, signal=25%"  
GSE2585\_CTEC\_VS\_THYMIC\_DC\_UP GSE2585\_CTEC\_VS\_THYMIC\_DC\_UP  
140 -0.23948796 -0.99017245 0.47777778  
0.5472375 1 2257 "tags=19%, list=16%, signal=22%"  
GSE17974\_0.5H\_VS\_72H\_UNTREATED\_IN\_VITRO\_CD4\_TCELL\_UP  
GSE17974\_0.5H\_VS\_72H\_UNTREATED\_IN\_VITRO\_CD4\_TCELL\_UP  
115 -0.25225174 -0.9898684 0.48518518  
0.54781514 1 1638 "tags=17%, list=12%, signal=20%"  
GSE32986\_UNSTIM\_VS\_GMCSF\_AND\_CURDLAN\_LOWDOSE\_STIM\_DC\_DN  
GSE32986\_UNSTIM\_VS\_GMCSF\_AND\_CURDLAN\_LOWDOSE\_STIM\_DC\_DN  
131 -0.24506128 -0.98976505 0.47058824  
0.5478116 1 1597 "tags=17%, list=11%, signal=19%"



GSE18281\_SUBCAPSULAR\_CORTICAL\_REGION\_VS\_WHOLE\_CORTEX\_THYMUS\_DN  
GSE18281\_SUBCAPSULAR\_CORTICAL\_REGION\_VS\_WHOLE\_CORTEX\_THYMUS\_DN  
138 -0.24108349 -0.98960435 0.46395564  
0.54797953 1 2422 "tags=20%, list=17%, signal=24%"  
GSE6875\_TCONV\_VS\_FOXP3\_KO\_TREG\_UP GSE6875\_TCONV\_VS\_FOXP3\_KO\_TREG\_UP  
136 -0.24187772 -0.9892173 0.4797048  
0.5488005 1 2278 "tags=19%, list=16%, signal=23%"  
GSE6674\_UNSTIM\_VS\_ANTI\_IGM\_AND\_CPG\_STIM\_BCELL\_DN  
GSE6674\_UNSTIM\_VS\_ANTI\_IGM\_AND\_CPG\_STIM\_BCELL\_DN  
142 -0.23891267 -0.98851156 0.47338402  
0.55049086 1 1726 "tags=22%, list=12%, signal=25%"  
GSE6259\_FLT3L\_INDUCED\_33D1\_POS\_DC\_VS\_CD4\_TCELL\_UP  
GSE6259\_FLT3L\_INDUCED\_33D1\_POS\_DC\_VS\_CD4\_TCELL\_UP  
146 -0.24024853 -0.9880631 0.46034816  
0.5514256 1 2539 "tags=25%, list=18%, signal=30%"  
GSE8685\_IL2\_ACT\_IL2\_STARVED\_VS\_IL15\_ACT\_IL2\_STARVED\_CD4\_TCELL\_UP  
GSE8685\_IL2\_ACT\_IL2\_STARVED\_VS\_IL15\_ACT\_IL2\_STARVED\_CD4\_TCELL\_UP  
142 -0.24088992 -0.98801786 0.4892368  
0.55125487 1 1072 "tags=13%, list=8%, signal=14%"  
GSE27786\_BCELL\_VS\_CD8\_TCELL\_DN GSE27786\_BCELL\_VS\_CD8\_TCELL\_DN  
139 -0.24197663 -0.9880122 0.45773196  
0.550976 1 2666 "tags=24%, list=19%, signal=29%"  
GSE21063\_CTRL\_VS\_ANTI\_IGM\_STIM\_BCELL\_16H\_DN  
GSE21063\_CTRL\_VS\_ANTI\_IGM\_STIM\_BCELL\_16H\_DN  
138 -0.23992765 -0.98705304 0.48228347  
0.55334866 1 2404 "tags=20%, list=17%, signal=23%"  
GSE24574\_BCL6\_HIGH\_TFH\_VS\_TCONV\_CD4\_TCELL\_DN  
GSE24574\_BCL6\_HIGH\_TFH\_VS\_TCONV\_CD4\_TCELL\_DN  
138 -0.24336416 -0.9868586 0.47916666  
0.55359524 1 3298 "tags=26%, list=23%, signal=34%"  
GSE15324\_ELF4\_KO\_VS\_WT\_NAIVE\_CD8\_TCELL\_DN  
GSE15324\_ELF4\_KO\_VS\_WT\_NAIVE\_CD8\_TCELL\_DN  
148 -0.23773846 -0.98640984 0.50769234  
0.5545555 1 3490 "tags=30%, list=25%, signal=40%"  
GSE22611\_NOD2\_VS\_MUTANT\_NOD2\_TRANSDUCE\_HEK293T\_CELL\_DN  
GSE22611\_NOD2\_VS\_MUTANT\_NOD2\_TRANSDUCE\_HEK293T\_CELL\_DN  
134 -0.23717979 -0.985595 0.46868688  
0.5565442 1 2437 "tags=21%, list=17%, signal=25%"  
GSE6674\_UNSTIM\_VS\_ANTI\_IGM\_STIM\_BCELL\_DN  
GSE6674\_UNSTIM\_VS\_ANTI\_IGM\_STIM\_BCELL\_DN  
95 -0.25820833 -0.9855465 0.44204322  
0.5563794 1 5188 "tags=37%, list=37%, signal=58%"  
GSE13522\_WT\_VS\_IFNG\_KO\_SKING\_T\_CRUZI\_Y\_STRAIN\_INF\_UP  
GSE13522\_WT\_VS\_IFNG\_KO\_SKING\_T\_CRUZI\_Y\_STRAIN\_INF\_UP  
90 -0.2608125 -0.98532844 0.4895238  
0.5566931 1 5718 "tags=43%, list=41%, signal=72%"  
GSE360\_CTRL\_VS\_B\_MALAYI\_LOW\_DOSE\_DC\_DN  
GSE360\_CTRL\_VS\_B\_MALAYI\_LOW\_DOSE\_DC\_DN  
148 -0.2403312 -0.9846408 0.4770115  
0.55838376 1 2553 "tags=23%, list=18%, signal=28%"  
GSE4811\_CLASSICALY\_ACTIVATED\_VS\_TYPE\_2\_ACTIVATED\_MACROPHAGE\_DN  
GSE4811\_CLASSICALY\_ACTIVATED\_VS\_TYPE\_2\_ACTIVATED\_MACROPHAGE\_DN  
143 -0.23925462 -0.9837222 0.49510762  
0.56065255 1 5273 "tags=38%, list=37%, signal=60%"

GSE31622\_WT\_VS\_KLF3\_KO\_BCELL\_UP GSE31622\_WT\_VS\_KLF3\_KO\_BCELL\_UP  
149 -0.23777737 -0.98342 0.47211897  
0.5612257 1 3344 "tags=27%, list=24%, signal=35%"  
GSE360\_L\_MAJOR\_VS\_T\_GONDII\_MAC\_UP GSE360\_L\_MAJOR\_VS\_T\_GONDII\_MAC\_UP  
153 -0.23990281 -0.98274 0.52327746 0.562839  
1 3101 "tags=24%, list=22%, signal=31%"  
GSE43955\_TH0\_VS\_TGFB\_IL6\_TH17\_ACT\_CD4\_TCELL\_42H\_DN  
GSE43955\_TH0\_VS\_TGFB\_IL6\_TH17\_ACT\_CD4\_TCELL\_42H\_DN  
165 -0.23464088 -0.9821416 0.5095785  
0.5642064 1 2279 "tags=18%, list=16%, signal=21%"  
GSE18893\_CTRL\_VS\_TNF\_TREATED\_TCONV\_24H\_DN  
GSE18893\_CTRL\_VS\_TNF\_TREATED\_TCONV\_24H\_DN  
143 -0.23827653 -0.98172575 0.48761904 0.565085  
1 1852 "tags=19%, list=13%, signal=22%"  
GSE32901\_TH1\_VS\_TH17\_NEG\_CD4\_TCELL\_UP  
GSE32901\_TH1\_VS\_TH17\_NEG\_CD4\_TCELL\_UP  
95 -0.2531898 -0.9817203 0.49438202  
0.5648034 1 2639 "tags=19%, list=19%, signal=23%"  
GSE4142\_NAIVE\_BCELL\_VS\_PLASMA\_CELL\_DN  
GSE4142\_NAIVE\_BCELL\_VS\_PLASMA\_CELL\_DN  
146 -0.23899685 -0.9814038 0.5 0.5653765  
1 2213 "tags=20%, list=16%, signal=23%"  
GSE11924\_TH1\_VS\_TH2\_CD4\_TCELL\_DN GSE11924\_TH1\_VS\_TH2\_CD4\_TCELL\_DN  
146 -0.23609993 -0.98033893 0.48906562  
0.5680914 1 2508 "tags=24%, list=18%, signal=29%"  
GSE19512\_NAUTRAL\_VS\_INDUCED\_TREG\_DN  
GSE19512\_NAUTRAL\_VS\_INDUCED\_TREG\_DN  
145 -0.23844709 -0.9788065 0.49499 0.5721818  
1 2078 "tags=17%, list=15%, signal=19%"  
GSE21546\_WT\_VS\_ELK1\_KO\_ANTI\_CD3\_STIM\_DP\_THYMOCYTES\_UP  
GSE21546\_WT\_VS\_ELK1\_KO\_ANTI\_CD3\_STIM\_DP\_THYMOCYTES\_UP  
143 -0.23562385 -0.9786957 0.5122873  
0.57220346 1 3233 "tags=27%, list=23%, signal=35%"  
GSE17721\_PAM3CSK4\_VS\_CPG\_0.5H\_BMDC\_UP  
GSE17721\_PAM3CSK4\_VS\_CPG\_0.5H\_BMDC\_UP  
151 -0.2372458 -0.97787505 0.49256507  
0.5742242 1 3926 "tags=34%, list=28%, signal=46%"  
GSE14769\_UNSTIM\_VS\_80MIN\_LPS\_BMDM\_UP  
GSE14769\_UNSTIM\_VS\_80MIN\_LPS\_BMDM\_UP  
127 -0.24159575 -0.9774133 0.4970874  
0.57526124 1 2357 "tags=23%, list=17%, signal=27%"  
GSE3982\_BCELL\_VS\_TH1\_UP GSE3982\_BCELL\_VS\_TH1\_UP  
126 -0.24055098 -0.97736895 0.48979592  
0.57508826 1 3367 "tags=34%, list=24%, signal=44%"  
GSE17721\_CPG\_VS\_GARDIQUIMOD\_2H\_BMDC\_DN  
GSE17721\_CPG\_VS\_GARDIQUIMOD\_2H\_BMDC\_DN  
157 -0.22933967 -0.97662616 0.5118577  
0.57691246 1 1587 "tags=16%, list=11%, signal=18%"  
GSE3982\_MAST\_CELL\_VS\_BCELL\_UP GSE3982\_MAST\_CELL\_VS\_BCELL\_UP  
145 -0.23431508 -0.9751779 0.5041494  
0.5807008 1 1770 "tags=16%, list=13%, signal=18%"  
GSE26343\_WT\_VS\_NFAT5\_KO\_MACROPHAGE\_LPS\_STIM\_UP  
GSE26343\_WT\_VS\_NFAT5\_KO\_MACROPHAGE\_LPS\_STIM\_UP  
147 -0.23487978 -0.9742986 0.5304183

|                                                                   |             |                                                                   |                                  |
|-------------------------------------------------------------------|-------------|-------------------------------------------------------------------|----------------------------------|
| 0.5828916                                                         | 1           | 3756                                                              | "tags=35%, list=27%, signal=47%" |
| GSE18148_CFBK_KO_VS_WT_TREG_UP                                    |             | GSE18148_CFBK_KO_VS_WT_TREG_UP                                    |                                  |
| 135                                                               | -0.24186772 | -0.97374284                                                       | 0.5156863                        |
| 0.58415854                                                        | 1           | 4529                                                              | "tags=36%, list=32%, signal=52%" |
| GSE42724_B1_BCELL_VS_PLASMABLAST_DN                               |             | GSE42724_B1_BCELL_VS_PLASMABLAST_DN                               |                                  |
| 134                                                               | -0.23794375 | -0.9730572                                                        | 0.49380532                       |
| 0.58577275                                                        | 1           | 2777                                                              | "tags=24%, list=20%, signal=29%" |
| GSE35825_UNTREATED_VS_IFNA_STIM_MACROPHAGE_UP                     |             | GSE35825_UNTREATED_VS_IFNA_STIM_MACROPHAGE_UP                     |                                  |
| 135                                                               | -0.23944159 | -0.9724443                                                        | 0.5084112                        |
| 0.58718467                                                        | 1           | 1920                                                              | "tags=21%, list=14%, signal=25%" |
| GSE37301_LYMPHOID_PRIMED_MPP_VS_RAG2_KO_NK_CELL_DN                |             | GSE37301_LYMPHOID_PRIMED_MPP_VS_RAG2_KO_NK_CELL_DN                |                                  |
| 126                                                               | -0.24226761 | -0.9723406                                                        | 0.5064935                        |
| 0.5871702                                                         | 1           | 2708                                                              | "tags=22%, list=19%, signal=27%" |
| GSE17721_PAM3CSK4_VS_GADIQUIMOD_6H_BMDC_DN                        |             | GSE17721_PAM3CSK4_VS_GADIQUIMOD_6H_BMDC_DN                        |                                  |
| 159                                                               | -0.23217535 | -0.97078556                                                       | 0.519084 0.5913302               |
| 1                                                                 | 2388        | "tags=23%, list=17%, signal=27%"                                  |                                  |
| GSE39820_IL1B_IL6_VS_IL1B_IL6_IL23A_TREATED_CD4_TCELL_UP          |             | GSE39820_IL1B_IL6_VS_IL1B_IL6_IL23A_TREATED_CD4_TCELL_UP          |                                  |
| 137                                                               | -0.23372355 | -0.9706463                                                        | 0.5225933                        |
| 0.5914304                                                         | 1           | 2130                                                              | "tags=16%, list=15%, signal=19%" |
| GSE27786_NKCELL_VS_NKTCELL_DN                                     |             | GSE27786_NKCELL_VS_NKTCELL_DN                                     |                                  |
| 123                                                               | -0.24220805 | -0.9702602                                                        | 0.5219885                        |
| 0.59224427                                                        | 1           | 2024                                                              | "tags=20%, list=14%, signal=23%" |
| GSE25677_R848_VS_MPL_AND_R848_STIM_BCELL_UP                       |             | GSE25677_R848_VS_MPL_AND_R848_STIM_BCELL_UP                       |                                  |
| 104                                                               | -0.24942584 | -0.96995896                                                       | 0.5120594                        |
| 0.5927992                                                         | 1           | 6180                                                              | "tags=55%, list=44%, signal=97%" |
| GSE8515_CTRL_VS_IL1_4H_STIM_MAC_UP                                |             | GSE8515_CTRL_VS_IL1_4H_STIM_MAC_UP                                |                                  |
| 135                                                               | -0.23840374 | -0.96880084                                                       | 0.5175097                        |
| 0.5957355                                                         | 1           | 2313                                                              | "tags=21%, list=16%, signal=25%" |
| GSE18281_PERIMEDULLARY_CORTICAL_REGION_VS_WHOLE_MEDULLA_THYMUS_DN |             | GSE18281_PERIMEDULLARY_CORTICAL_REGION_VS_WHOLE_MEDULLA_THYMUS_DN |                                  |
| 106                                                               | -0.24614905 | -0.96803427                                                       | 0.55263156                       |
| 0.5975953                                                         | 1           | 2960                                                              | "tags=25%, list=21%, signal=31%" |
| GSE42724_NAIVE_VS_MEMORY_BCELL_DN                                 |             | GSE42724_NAIVE_VS_MEMORY_BCELL_DN                                 |                                  |
| 136                                                               | -0.23567253 | -0.96759266                                                       | 0.5443038                        |
| 0.5985367                                                         | 1           | 670                                                               | "tags=10%, list=5%, signal=11%"  |
| GSE360_CTRL_VS_T_GONDII_DC_UP                                     |             | GSE360_CTRL_VS_T_GONDII_DC_UP                                     |                                  |
| 156                                                               | -0.23294196 | -0.9670531                                                        | 0.5404896                        |
| 0.59975064                                                        | 1           | 2164                                                              | "tags=19%, list=15%, signal=22%" |
| GSE29618_PRE_VS_DAY7_POST_TIV_FLU_VACCINE_MDC_UP                  |             | GSE29618_PRE_VS_DAY7_POST_TIV_FLU_VACCINE_MDC_UP                  |                                  |
| 132                                                               | -0.23887484 | -0.9669543                                                        | 0.5243665                        |
| 0.59970623                                                        | 1           | 2420                                                              | "tags=20%, list=17%, signal=24%" |
| GSE15215_CD2_POS_VS_NEG_PDC_UP                                    |             | GSE15215_CD2_POS_VS_NEG_PDC_UP                                    |                                  |
| 147                                                               | -0.23287214 | -0.9668037                                                        | 0.5584906                        |
| 0.59984326                                                        | 1           | 1404                                                              | "tags=13%, list=10%, signal=14%" |
| GSE20715_WT_VS_TLR4_KO_6H_OZONE_LUNG_DN                           |             | GSE20715_WT_VS_TLR4_KO_6H_OZONE_LUNG_DN                           |                                  |

143 -0.23688275 -0.9662926 0.53763443  
0.6009961 1 2664 "tags=22%, list=19%, signal=26%"  
GSE15330\_LYMPHOID\_MULTIPOTENT\_VS\_PRO\_BCELL\_UP  
GSE15330\_LYMPHOID\_MULTIPOTENT\_VS\_PRO\_BCELL\_UP  
162 -0.22702836 -0.96620876 0.5425926  
0.60090464 1 2152 "tags=18%, list=15%, signal=21%"  
GSE21063\_WT\_VS\_NFATC1\_KO\_3H\_ANTI\_IGM\_STIM\_BCELL\_UP  
GSE21063\_WT\_VS\_NFATC1\_KO\_3H\_ANTI\_IGM\_STIM\_BCELL\_UP  
147 -0.23235852 -0.9653367 0.535316 0.6031129  
1 1254 "tags=13%, list=9%, signal=14%"  
GSE14308\_NAIVE\_CD4\_TCELL\_VS\_INDUCED\_TREG\_UP  
GSE14308\_NAIVE\_CD4\_TCELL\_VS\_INDUCED\_TREG\_UP  
127 -0.23856117 -0.9648113 0.5222222  
0.6043354 1 3602 "tags=30%, list=26%, signal=40%"  
GSE41867\_DAY6\_VS\_DAY15\_LCMV\_CLONE13\_EFFECTOR\_CD8\_TCELL\_DN  
GSE41867\_DAY6\_VS\_DAY15\_LCMV\_CLONE13\_EFFECTOR\_CD8\_TCELL\_DN  
98 -0.24692184 -0.9640945 0.5310219 0.606133  
1 3577 "tags=29%, list=25%, signal=38%"  
GSE15930\_STIM\_VS\_STIM\_AND\_TRICHOSTATINA\_24H\_CD8\_T\_CELL\_UP  
GSE15930\_STIM\_VS\_STIM\_AND\_TRICHOSTATINA\_24H\_CD8\_T\_CELL\_UP  
164 -0.23169664 -0.96403223 0.5654649  
0.60598886 1 2151 "tags=18%, list=15%, signal=21%"  
GSE2405\_HEAT\_KILLED\_VS\_LIVE\_A\_PHAGOCYTOPHILUM\_STIM\_NEUTROPHIL\_24H\_UP  
  
GSE2405\_HEAT\_KILLED\_VS\_LIVE\_A\_PHAGOCYTOPHILUM\_STIM\_NEUTROPHIL\_24H\_UP  
118 -0.24371818 -0.9638265  
0.51498127 0.6062425 1 2437 "tags=20%,  
list=17%, signal=24%"  
GSE3982\_EOSINOPHIL\_VS\_BCELL\_UP GSE3982\_EOSINOPHIL\_VS\_BCELL\_UP  
159 -0.23320945 -0.9634766 0.5487572  
0.60693336 1 2211 "tags=19%, list=16%, signal=22%"  
GSE17721\_POLYIC\_VS\_CPG\_16H\_BMDC\_UP  
GSE17721\_POLYIC\_VS\_CPG\_16H\_BMDC\_UP  
156 -0.23277056 -0.96320236 0.5571688  
0.6073996 1 2931 "tags=26%, list=21%, signal=33%"  
GSE25147\_UNSTIM\_VS\_HELIOBACTER\_PYLORI\_LPS\_STIM\_MKN45\_CELL\_DN  
GSE25147\_UNSTIM\_VS\_HELIOBACTER\_PYLORI\_LPS\_STIM\_MKN45\_CELL\_DN  
124 -0.23993516 -0.9624382 0.5247706  
0.6093039 1 2318 "tags=18%, list=16%, signal=21%"  
GSE17721\_0.5H\_VS\_24H\_CPG\_BMDC\_DN GSE17721\_0.5H\_VS\_24H\_CPG\_BMDC\_DN  
157 -0.23100019 -0.961497 0.5588785  
0.61173135 1 2501 "tags=20%, list=18%, signal=24%"  
GSE1432\_CTRL\_VS\_IFNG\_24H\_MICROGLIA\_UP  
GSE1432\_CTRL\_VS\_IFNG\_24H\_MICROGLIA\_UP  
154 -0.230387 -0.96144164 0.5447316  
0.61156803 1 2101 "tags=20%, list=15%, signal=23%"  
GSE39820\_TGFBETA1\_IL6\_VS\_TGFBETA1\_IL6\_IL23A\_TREATED\_CD4\_TCELL\_UP  
GSE39820\_TGFBETA1\_IL6\_VS\_TGFBETA1\_IL6\_IL23A\_TREATED\_CD4\_TCELL\_UP  
159 -0.22887135 -0.9606662 0.52845526  
0.61348426 1 2118 "tags=19%, list=15%, signal=23%"  
GSE17186\_CD21LOW\_VS\_CD21HIGH\_TRANSITIONAL\_BCELL\_CORD\_BLOOD\_DN  
GSE17186\_CD21LOW\_VS\_CD21HIGH\_TRANSITIONAL\_BCELL\_CORD\_BLOOD\_DN  
147 -0.2331259 -0.9605839 0.53394496  
0.613405 1 2311 "tags=22%, list=16%, signal=26%"

GSE41176\_WT\_VS\_TAK1\_KO\_ANTI\_IGM\_STIM\_BCELL\_1H\_DN  
GSE41176\_WT\_VS\_TAK1\_KO\_ANTI\_IGM\_STIM\_BCELL\_1H\_DN  
144 -0.23257507 -0.9605452 0.5510204  
0.6131889 1 5662 "tags=46%, list=40%, signal=76%"  
GSE360\_L\_DONOVANI\_VS\_B\_MALAYI\_HIGH\_DOSE\_DC\_UP  
GSE360\_L\_DONOVANI\_VS\_B\_MALAYI\_HIGH\_DOSE\_DC\_UP  
150 -0.23158097 -0.9596438 0.5611111  
0.6154961 1 3164 "tags=30%, list=22%, signal=38%"  
GSE17721\_CTRL\_VS\_POLYIC\_24H\_BMDC\_DN  
GSE17721\_CTRL\_VS\_POLYIC\_24H\_BMDC\_DN  
155 -0.22767687 -0.95880616 0.53937006  
0.61758566 1 1770 "tags=14%, list=13%, signal=16%"  
GSE19923\_WT\_VS\_HEB\_KO\_DP\_THYMOCYTE\_UP  
GSE19923\_WT\_VS\_HEB\_KO\_DP\_THYMOCYTE\_UP  
159 -0.23159578 -0.95872957 0.5546875  
0.61749256 1 2995 "tags=28%, list=21%, signal=35%"  
GSE2128\_C57BL6\_VS\_NOD\_THYMOCYTE\_MIMETOPE\_NEGATIVE\_SELECTION\_UP  
GSE2128\_C57BL6\_VS\_NOD\_THYMOCYTE\_MIMETOPE\_NEGATIVE\_SELECTION\_UP  
145 -0.23048449 -0.95869863 0.5658153  
0.6172527 1 3582 "tags=26%, list=25%, signal=34%"  
GSE23114\_WT\_VS\_SLE2C1\_MOUSE\_PERITONEAL\_CAVITY\_B1A\_BCELL\_DN  
GSE23114\_WT\_VS\_SLE2C1\_MOUSE\_PERITONEAL\_CAVITY\_B1A\_BCELL\_DN  
121 -0.23856336 -0.95799917 0.5394737  
0.6189161 1 1704 "tags=12%, list=12%, signal=14%"  
GSE14415\_INDUCED\_TREG\_VS\_FOXP3\_KO\_INDUCED\_TREG\_IL2\_CULTURE\_DN  
GSE14415\_INDUCED\_TREG\_VS\_FOXP3\_KO\_INDUCED\_TREG\_IL2\_CULTURE\_DN  
94 -0.250244 -0.95671916 0.5277778  
0.62224305 1 1414 "tags=14%, list=10%, signal=15%"  
GSE339\_CD4POS\_VS\_CD8POS\_DC\_IN\_CULTURE\_UP  
GSE339\_CD4POS\_VS\_CD8POS\_DC\_IN\_CULTURE\_UP  
157 -0.23143084 -0.9565451 0.5685185 0.622442  
1 3615 "tags=32%, list=26%, signal=42%"  
GSE8515\_CTRL\_VS\_IL6\_4H\_STIM\_MAC\_DN  
GSE8515\_CTRL\_VS\_IL6\_4H\_STIM\_MAC\_DN  
139 -0.23510446 -0.95611423 0.5486381  
0.62334514 1 4453 "tags=36%, list=32%, signal=52%"  
GSE45365\_WT\_VS\_IFNAR\_KO\_CD8A\_DC\_MCMV\_INFECTIION\_DN  
GSE45365\_WT\_VS\_IFNAR\_KO\_CD8A\_DC\_MCMV\_INFECTIION\_DN  
123 -0.23850058 -0.956078 0.53231937 0.623134  
1 1289 "tags=11%, list=9%, signal=12%"  
GSE25890\_CTRL\_VS\_IL33\_IL7\_TREATED\_NUOCYTES\_UP  
GSE25890\_CTRL\_VS\_IL33\_IL7\_TREATED\_NUOCYTES\_UP  
136 -0.23649885 -0.95481044 0.5689655  
0.62646836 1 1718 "tags=16%, list=12%, signal=18%"  
GSE40274\_CTRL\_VS\_FOXP3\_AND\_SATB1\_TRANSDUCED\_ACTIVATED\_CD4\_TCELL\_DN  
GSE40274\_CTRL\_VS\_FOXP3\_AND\_SATB1\_TRANSDUCED\_ACTIVATED\_CD4\_TCELL\_DN  
115 -0.24080369 -0.95394677 0.5509804  
0.6286248 1 2515 "tags=23%, list=18%, signal=27%"  
GSE11924\_TH2\_VS\_TH17\_CD4\_TCELL\_DN GSE11924\_TH2\_VS\_TH17\_CD4\_TCELL\_DN  
143 -0.23110776 -0.9536745 0.57247704  
0.6290472 1 2248 "tags=20%, list=16%, signal=24%"  
GSE9037\_WT\_VS\_IRAK4\_KO\_LPS\_1H\_STIM\_BMDM\_UP  
GSE9037\_WT\_VS\_IRAK4\_KO\_LPS\_1H\_STIM\_BMDM\_UP  
140 -0.22898081 -0.95319813 0.5694444

0.6300813 1 2508 "tags=21%, list=18%, signal=25%"  
GSE22935\_UNSTIM\_VS\_24H\_MBOVIS\_BCG\_STIM\_MYD88\_KO\_MACROPHAGE\_DN  
GSE22935\_UNSTIM\_VS\_24H\_MBOVIS\_BCG\_STIM\_MYD88\_KO\_MACROPHAGE\_DN  
138 -0.23336828 -0.9531478 0.5673624  
0.62990165 1 3282 "tags=25%, list=23%, signal=32%"  
GSE2405\_0H\_VS\_6H\_A\_PHAGOCYTOPHILUM\_STIM\_NEUTROPHIL\_DN  
GSE2405\_0H\_VS\_6H\_A\_PHAGOCYTOPHILUM\_STIM\_NEUTROPHIL\_DN  
119 -0.23738201 -0.9529868 0.5536723  
0.6300389 1 3066 "tags=19%, list=22%, signal=24%"  
GSE29949\_CD8\_POS\_DC\_SPLEEN\_VS\_DC\_BRAIN\_DN  
GSE29949\_CD8\_POS\_DC\_SPLEEN\_VS\_DC\_BRAIN\_DN  
139 -0.2319687 -0.95292014 0.567619 0.6298995  
1 3693 "tags=28%, list=26%, signal=38%"  
GSE37416\_CTRL\_VS\_0H\_F\_TULARENSIS\_LVS\_NEUTROPHIL\_UP  
GSE37416\_CTRL\_VS\_0H\_F\_TULARENSIS\_LVS\_NEUTROPHIL\_UP  
107 -0.24352038 -0.9528439 0.5533981  
0.6297895 1 3019 "tags=29%, list=21%, signal=37%"  
GSE30083\_SP3\_VS\_SP4\_THYMOCYTE\_UP GSE30083\_SP3\_VS\_SP4\_THYMOCYTE\_UP  
150 -0.22872564 -0.9527472 0.55839413  
0.6297389 1 3452 "tags=23%, list=24%, signal=31%"  
GSE27896\_HDAC6\_KO\_VS\_WT\_TREG\_DN GSE27896\_HDAC6\_KO\_VS\_WT\_TREG\_DN  
130 -0.23149027 -0.9520021 0.55841583  
0.6315819 1 3029 "tags=28%, list=21%, signal=35%"  
GSE3982\_BCELL\_VS\_NKCELL\_UP GSE3982\_BCELL\_VS\_NKCELL\_UP  
137 -0.23407334 -0.95114714 0.5731225  
0.63374364 1 2468 "tags=24%, list=17%, signal=29%"  
GSE19923\_WT\_VS\_E2A\_KO\_DP\_THYMOCYTE\_DN  
GSE19923\_WT\_VS\_E2A\_KO\_DP\_THYMOCYTE\_DN  
140 -0.23041031 -0.9498807 0.5743119  
0.6371277 1 1148 "tags=11%, list=8%, signal=12%"  
GSE29618\_PDC\_VS\_MDC\_UP GSE29618\_PDC\_VS\_MDC\_UP  
153 -0.22835313 -0.94891524 0.5973025  
0.6394967 1 2278 "tags=22%, list=16%, signal=25%"  
GSE20366\_CD103\_POS\_VS\_NEG\_TREG\_KLRG1NEG\_UP  
GSE20366\_CD103\_POS\_VS\_NEG\_TREG\_KLRG1NEG\_UP  
136 -0.22987579 -0.9487918 0.5808967  
0.63952255 1 2379 "tags=20%, list=17%, signal=24%"  
GSE4142\_NAIVE\_VS\_MEMORY\_BCELL\_UP GSE4142\_NAIVE\_VS\_MEMORY\_BCELL\_UP  
144 -0.22979769 -0.9477369 0.58733207  
0.642234 1 4178 "tags=32%, list=30%, signal=45%"  
GSE20151\_CTRL\_VS\_FUSOBACT\_NUCLEATUM\_NEUTROPHIL\_UP  
GSE20151\_CTRL\_VS\_FUSOBACT\_NUCLEATUM\_NEUTROPHIL\_UP  
140 -0.22832958 -0.9474358 0.582846 0.6427568  
1 2114 "tags=17%, list=15%, signal=20%"  
GSE46242\_CTRL\_VS\_EGR2\_DELETED\_TH1\_CD4\_TCELL\_DN  
GSE46242\_CTRL\_VS\_EGR2\_DELETED\_TH1\_CD4\_TCELL\_DN  
125 -0.2412636 -0.94737077 0.589942 0.6426111  
1 1771 "tags=17%, list=13%, signal=19%"  
GSE19772\_CTRL\_VS\_HCMV\_INF\_MONOCYTES\_DN  
GSE19772\_CTRL\_VS\_HCMV\_INF\_MONOCYTES\_DN  
112 -0.23601095 -0.94553095 0.57042253  
0.6474906 1 558 "tags=8%, list=4%, signal=8%"  
GSE5589\_IL6\_KO\_VS\_IL10\_KO\_LPS\_STIM\_MACROPHAGE\_180MIN\_UP  
GSE5589\_IL6\_KO\_VS\_IL10\_KO\_LPS\_STIM\_MACROPHAGE\_180MIN\_UP

137 -0.23183385 -0.9447099 0.5764023  
0.64946514 1 1849 "tags=16%, list=13%, signal=18%"  
GSE5589\_WT\_VS\_IL6\_KO\_LPS\_AND\_IL10\_STIM\_MACROPHAGE\_45MIN\_DN  
GSE5589\_WT\_VS\_IL6\_KO\_LPS\_AND\_IL10\_STIM\_MACROPHAGE\_45MIN\_DN  
154 -0.2286798 -0.94411737 0.5900383  
0.6508016 1 1387 "tags=16%, list=10%, signal=17%"  
GSE16385\_IL4\_VS\_ROSIGLITAZONE\_STIM\_MACROPHAGE\_DN  
GSE16385\_IL4\_VS\_ROSIGLITAZONE\_STIM\_MACROPHAGE\_DN  
120 -0.23832864 -0.9435993 0.5681382  
0.65194845 1 2867 "tags=28%, list=20%, signal=35%"  
GSE22103\_LPS\_VS\_GMCSF\_AND\_IFNG\_STIM\_NEUTROPHIL\_DN  
GSE22103\_LPS\_VS\_GMCSF\_AND\_IFNG\_STIM\_NEUTROPHIL\_DN  
145 -0.22460316 -0.9433045 0.6289425  
0.6524391 1 3817 "tags=35%, list=27%, signal=48%"  
GSE7218\_UNSTIM\_VS\_ANTIGEN\_STIM\_THROUGH\_IGM\_BCELL\_UP  
GSE7218\_UNSTIM\_VS\_ANTIGEN\_STIM\_THROUGH\_IGM\_BCELL\_UP  
106 -0.23913185 -0.9427287 0.58431375  
0.65375704 1 3400 "tags=30%, list=24%, signal=39%"  
GSE43955\_1H\_VS\_42H\_ACT\_CD4\_TCELL\_DN  
GSE43955\_1H\_VS\_42H\_ACT\_CD4\_TCELL\_DN  
160 -0.22625476 -0.9421786 0.594041 0.65499705  
1 2571 "tags=24%, list=18%, signal=29%"  
GSE3982\_BASOPHIL\_VS\_CENT\_MEMORY\_CD4\_TCELL\_DN  
GSE3982\_BASOPHIL\_VS\_CENT\_MEMORY\_CD4\_TCELL\_DN  
130 -0.23144196 -0.94166577 0.6007984  
0.65613145 1 2693 "tags=22%, list=19%, signal=26%"  
GSE18893\_CTRL\_VS\_TNF\_TREATED\_TREG\_24H\_UP  
GSE18893\_CTRL\_VS\_TNF\_TREATED\_TREG\_24H\_UP  
143 -0.22669141 -0.9415122 0.5946463  
0.65622723 1 2238 "tags=19%, list=16%, signal=22%"  
GSE21670\_TGFB\_VS\_IL6\_TREATED\_CD4\_TCELL\_DN  
GSE21670\_TGFB\_VS\_IL6\_TREATED\_CD4\_TCELL\_DN  
145 -0.23020722 -0.9410995 0.6007752  
0.6570879 1 3921 "tags=32%, list=28%, signal=44%"  
GSE20500\_RETINOIC\_ACID\_VS\_RARA\_ANTAGONIST\_TREATED\_CD4\_TCELL\_UP  
GSE20500\_RETINOIC\_ACID\_VS\_RARA\_ANTAGONIST\_TREATED\_CD4\_TCELL\_UP  
141 -0.23036562 -0.9410225 0.6007752  
0.6569691 1 2212 "tags=20%, list=16%, signal=23%"  
GSE17721\_CTRL\_VS\_GARDIQUIMOD\_8H\_BMDC\_DN  
GSE17721\_CTRL\_VS\_GARDIQUIMOD\_8H\_BMDC\_DN  
160 -0.22623698 -0.9406375 0.57481754  
0.6577053 1 2179 "tags=19%, list=15%, signal=23%"  
GSE16385\_IFNG\_TNF\_VS\_UNSTIM\_MACROPHAGE\_ROSIGLITAZONE\_TREATED\_UP  
GSE16385\_IFNG\_TNF\_VS\_UNSTIM\_MACROPHAGE\_ROSIGLITAZONE\_TREATED\_UP  
108 -0.23858316 -0.93954736 0.6  
0.6605146 1 1546 "tags=15%, list=11%, signal=17%"  
GSE18791\_UNSTIM\_VS\_NEWCATSLE\_VIRUS\_DC\_1H\_UP  
GSE18791\_UNSTIM\_VS\_NEWCATSLE\_VIRUS\_DC\_1H\_UP  
103 -0.2418953 -0.93849206 0.5725047  
0.66327554 1 4567 "tags=40%, list=32%, signal=58%"  
GSE14413\_UNSTIM\_VS\_IFNB\_STIM\_L929\_CELLS\_UP  
GSE14413\_UNSTIM\_VS\_IFNB\_STIM\_L929\_CELLS\_UP  
70 -0.2562036 -0.93754405 0.5574074 0.665605  
1 2628 "tags=23%, list=19%, signal=28%"

GSE28737\_FOLLICULAR\_VS\_MARGINAL\_ZONE\_BCELL\_BCL6\_HET\_DN  
GSE28737\_FOLLICULAR\_VS\_MARGINAL\_ZONE\_BCELL\_BCL6\_HET\_DN  
146 -0.22524585 -0.93677455 0.60820895  
0.66755813 1 2076 "tags=21%, list=15%, signal=25%"  
GSE46606\_IRF4\_KO\_VS\_WT\_CD40L\_IL2\_IL5\_1DAY\_STIMULATED\_BCELL\_UP  
GSE46606\_IRF4\_KO\_VS\_WT\_CD40L\_IL2\_IL5\_1DAY\_STIMULATED\_BCELL\_UP  
123 -0.23387714 -0.93658555 0.61  
0.66776884 1 2030 "tags=20%, list=14%, signal=24%"  
GSE3982\_MAC\_VS\_CENT\_MEMORY\_CD4\_TCELL\_DN  
GSE3982\_MAC\_VS\_CENT\_MEMORY\_CD4\_TCELL\_DN  
123 -0.23486543 -0.935607 0.60828626  
0.67022926 1 2666 "tags=24%, list=19%, signal=29%"  
GSE26290\_CTRL\_VS\_AKT\_INHIBITOR\_TREATED\_ANTI\_CD3\_AND\_IL2\_STIM\_CD8\_TCELL\_UP  
GSE26290\_CTRL\_VS\_AKT\_INHIBITOR\_TREATED\_ANTI\_CD3\_AND\_IL2\_STIM\_CD8\_TCELL\_UP  
140 -0.23099962 -0.9353174  
0.57699805 0.6707392 1 2610 "tags=23%,  
list=18%, signal=28%"  
GSE28737\_FOLLICULAR\_VS\_MARGINAL\_ZONE\_BCELL\_DN  
GSE28737\_FOLLICULAR\_VS\_MARGINAL\_ZONE\_BCELL\_DN  
143 -0.22669536 -0.9352827 0.606679 0.6705112  
1 1224 "tags=10%, list=9%, signal=11%"  
GSE13173\_UNTREATED\_VS\_IL12\_TREATED\_ACT\_CD8\_TCELL\_UP  
GSE13173\_UNTREATED\_VS\_IL12\_TREATED\_ACT\_CD8\_TCELL\_UP  
92 -0.24137741 -0.93337595 0.59266055  
0.6756019 1 5217 "tags=40%, list=37%, signal=63%"  
GSE10422\_WT\_VS\_BAFF\_TRANSGENIC\_LN\_BCELL\_DN  
GSE10422\_WT\_VS\_BAFF\_TRANSGENIC\_LN\_BCELL\_DN  
96 -0.24326345 -0.9326266 0.58878505  
0.6773868 1 1600 "tags=16%, list=11%, signal=18%"  
GSE5589\_WT\_VS\_IL6\_KO\_LPS\_AND\_IL6\_STIM\_MACROPHAGE\_45MIN\_UP  
GSE5589\_WT\_VS\_IL6\_KO\_LPS\_AND\_IL6\_STIM\_MACROPHAGE\_45MIN\_UP  
140 -0.22481112 -0.9312113 0.64547205  
0.6811117 1 3483 "tags=29%, list=25%, signal=38%"  
GSE22282\_HYPOXIA\_VS\_NORMOXIA\_MYELOID\_DC\_UP  
GSE22282\_HYPOXIA\_VS\_NORMOXIA\_MYELOID\_DC\_UP  
158 -0.22279872 -0.93112826 0.6316832  
0.68100774 1 2138 "tags=20%, list=15%, signal=23%"  
GSE46025\_WT\_VS\_FOXO1\_KO\_KLRG1\_LOW\_CD8\_EFFECTOR\_TCELL\_UP  
GSE46025\_WT\_VS\_FOXO1\_KO\_KLRG1\_LOW\_CD8\_EFFECTOR\_TCELL\_UP  
133 -0.2313305 -0.9310905 0.6191406  
0.6807667 1 1851 "tags=16%, list=13%, signal=18%"  
GSE3982\_DC\_VS\_EFF\_MEMORY\_CD4\_TCELL\_UP  
GSE3982\_DC\_VS\_EFF\_MEMORY\_CD4\_TCELL\_UP  
152 -0.2246481 -0.93103296 0.6545802  
0.6805932 1 3363 "tags=29%, list=24%, signal=38%"  
GSE23114\_PERITONEAL\_CAVITY\_B1A\_BCELL\_VS\_SPLEEN\_BCELL\_IN\_SLE2C1\_MOUSE\_DN  
GSE23114\_PERITONEAL\_CAVITY\_B1A\_BCELL\_VS\_SPLEEN\_BCELL\_IN\_SLE2C1\_MOUSE\_DN  
133 -0.22802393 -0.93059653  
0.60714287 0.68147343 1 1986 "tags=19%,  
list=14%, signal=22%"  
GSE41978\_ID2\_KO\_AND\_BIM\_KO\_VS\_BIM\_KO\_KLRG1\_LOW\_EFFECTOR\_CD8\_TCELL\_UP



GSE41978\_ID2\_KO\_AND\_BIM\_KO\_VS\_BIM\_KO\_KLRG1\_LOW\_EFFECTOR\_CD8\_TCELL\_UP  
148 -0.22389895 -0.93029237  
0.63915545 0.6819905 1 2652 "tags=20%,  
list=19%, signal=25%"

GSE22342\_CD11C\_HIGH\_VS\_LOW\_DECIDUAL\_MACROPHAGES\_DN  
GSE22342\_CD11C\_HIGH\_VS\_LOW\_DECIDUAL\_MACROPHAGES\_DN  
115 -0.23447478 -0.9299086 0.6078067  
0.68274224 1 2022 "tags=18%, list=14%, signal=21%"

GSE15330\_HSC\_VS\_GRANULOCYTE\_MONOCYTE\_PROGENITOR\_DN  
GSE15330\_HSC\_VS\_GRANULOCYTE\_MONOCYTE\_PROGENITOR\_DN  
144 -0.22687787 -0.9298312 0.64510167  
0.6826134 1 1764 "tags=16%, list=12%, signal=18%"

GSE9037\_CTRL\_VS\_LPS\_4H\_STIM\_IRAK4\_KO\_BMDM\_UP  
GSE9037\_CTRL\_VS\_LPS\_4H\_STIM\_IRAK4\_KO\_BMDM\_UP  
134 -0.22565287 -0.92878073 0.6405959 0.685329  
1 2051 "tags=19%, list=15%, signal=22%"

GSE9601\_UNTREATED\_VS\_NFKB\_INHIBITOR\_TREATED\_HCMV\_INF\_MONOCYTE\_UP  
GSE9601\_UNTREATED\_VS\_NFKB\_INHIBITOR\_TREATED\_HCMV\_INF\_MONOCYTE\_UP  
121 -0.2321548 -0.9270581 0.6183206  
0.68992496 1 2297 "tags=22%, list=16%, signal=26%"

GSE19941\_UNSTIM\_VS\_LPS\_STIM\_IL10\_KO\_MACROPHAGE\_UP  
GSE19941\_UNSTIM\_VS\_LPS\_STIM\_IL10\_KO\_MACROPHAGE\_UP  
141 -0.22503583 -0.9255568 0.6431373  
0.6938627 1 3205 "tags=28%, list=23%, signal=36%"

GSE40274\_FOXP3\_VS\_FOXP3\_AND\_HELIOS\_TRANSDUCED\_ACTIVATED\_CD4\_TCELL\_UP  
  
GSE40274\_FOXP3\_VS\_FOXP3\_AND\_HELIOS\_TRANSDUCED\_ACTIVATED\_CD4\_TCELL\_UP  
106 -0.23449983 -0.92352164  
0.6380597 0.6992883 1 3499 "tags=25%,  
list=25%, signal=34%"

GSE45365\_HEALTHY\_VS\_MCMV\_INFECTION\_CD8\_TCELL\_IFNAR\_KO\_DN  
GSE45365\_HEALTHY\_VS\_MCMV\_INFECTION\_CD8\_TCELL\_IFNAR\_KO\_DN  
109 -0.23243187 -0.92158836 0.63582677  
0.70438784 1 2824 "tags=23%, list=20%, signal=28%"

GSE10240\_IL17\_VS\_IL17\_AND\_IL22\_STIM\_PRIMARY\_BRONCHIAL\_EPITHELIAL\_CEL  
LS\_DN  
GSE10240\_IL17\_VS\_IL17\_AND\_IL22\_STIM\_PRIMARY\_BRONCHIAL\_EPITHELIAL\_CEL  
LS\_DN  
150 -0.22394736 -0.92135084  
0.67248064 0.70470625 1 4783 "tags=34%,  
list=34%, signal=51%"

GSE19941\_IL10\_KO\_VS\_IL10\_KO\_AND\_NFKBP50\_KO\_LPS\_AND\_IL10\_STIM\_MACROPH  
AGE\_UP  
GSE19941\_IL10\_KO\_VS\_IL10\_KO\_AND\_NFKBP50\_KO\_LPS\_AND\_IL10\_STIM\_MACROPH  
AGE\_UP  
143 -0.2229135 -0.9202552  
0.63147795 0.7075091 1 2313 "tags=21%,  
list=16%, signal=25%"

GSE13485\_DAY1\_VS\_DAY21\_YF17D\_VACCINE\_PBMC\_UP  
GSE13485\_DAY1\_VS\_DAY21\_YF17D\_VACCINE\_PBMC\_UP  
121 -0.22902147 -0.9192781 0.6401591  
0.7099013 1 1308 "tags=15%, list=9%, signal=16%"

GSE21670\_UNTREATED\_VS\_TGFB\_TREATED\_STAT3\_KO\_CD4\_TCELL\_UP  
GSE21670\_UNTREATED\_VS\_TGFB\_TREATED\_STAT3\_KO\_CD4\_TCELL\_UP  
142 -0.22536819 -0.91828334 0.67241377  
0.71236503 1 2342 "tags=20%, list=17%, signal=23%"

GSE17721\_CPG\_VS\_GARDIQUIMOD\_8H\_BMDC\_DN  
GSE17721\_CPG\_VS\_GARDIQUIMOD\_8H\_BMDC\_DN  
145 -0.22024935 -0.91758627 0.6632653  
0.71397126 1 1749 "tags=15%, list=12%, signal=17%"  
GSE37301\_MULTIPOTENT\_PROGENITOR\_VS\_PRO\_BCELL\_UP  
GSE37301\_MULTIPOTENT\_PROGENITOR\_VS\_PRO\_BCELL\_UP  
148 -0.2187401 -0.91684943 0.6528302  
0.7156835 1 3146 "tags=27%, list=22%, signal=34%"  
GSE18791\_UNSTIM\_VS\_NEWCATSLE\_VIRUS\_DC\_6H\_UP  
GSE18791\_UNSTIM\_VS\_NEWCATSLE\_VIRUS\_DC\_6H\_UP  
127 -0.22975156 -0.9140689 0.6531008  
0.7231006 1 2008 "tags=20%, list=14%, signal=23%"  
GSE34217\_MIR17\_92\_OVEREXPRESS\_VS\_WT\_ACT\_CD8\_TCELL\_UP  
GSE34217\_MIR17\_92\_OVEREXPRESS\_VS\_WT\_ACT\_CD8\_TCELL\_UP  
102 -0.23603222 -0.913764 0.609127 0.7235855  
1 3379 "tags=26%, list=24%, signal=35%"  
GSE41176\_UNSTIM\_VS\_ANTI\_IGM\_STIM\_TAK1\_KO\_BCELL\_6H\_DN  
GSE41176\_UNSTIM\_VS\_ANTI\_IGM\_STIM\_TAK1\_KO\_BCELL\_6H\_DN  
129 -0.22804968 -0.91362315 0.6343874  
0.72361815 1 6163 "tags=44%, list=44%, signal=78%"  
GSE29618\_PRE\_VS\_DAY7\_POST\_LAIV\_FLU\_VACCINE\_PDC\_UP  
GSE29618\_PRE\_VS\_DAY7\_POST\_LAIV\_FLU\_VACCINE\_PDC\_UP  
140 -0.22236039 -0.91243756 0.6640777  
0.72646874 1 3880 "tags=34%, list=27%, signal=46%"  
GSE29949\_CD8\_NEG\_DC\_SPLEEN\_VS\_DC\_BRAIN\_UP  
GSE29949\_CD8\_NEG\_DC\_SPLEEN\_VS\_DC\_BRAIN\_UP  
144 -0.22145893 -0.91186714 0.66368514  
0.7277006 1 4067 "tags=31%, list=29%, signal=42%"  
GSE37605\_C57BL6\_VS\_NOD\_FOXP3\_FUSION\_GFP\_TREG\_UP  
GSE37605\_C57BL6\_VS\_NOD\_FOXP3\_FUSION\_GFP\_TREG\_UP  
82 -0.23875491 -0.911764 0.6451613  
0.7276107 1 6543 "tags=50%, list=46%, signal=93%"  
GSE10239\_MEMORY\_VS\_KLRG1INT\_EFF\_CD8\_TCELL\_UP  
GSE10239\_MEMORY\_VS\_KLRG1INT\_EFF\_CD8\_TCELL\_UP  
132 -0.22607748 -0.91086555 0.69285715 0.729706  
1 3181 "tags=26%, list=23%, signal=33%"  
GSE17721\_CTRL\_VS\_POLYIC\_6H\_BMDC\_DN  
GSE17721\_CTRL\_VS\_POLYIC\_6H\_BMDC\_DN  
159 -0.21892008 -0.9107478 0.69507575  
0.7296628 1 2048 "tags=17%, list=15%, signal=20%"  
GSE15330\_WT\_VS\_IKAROS\_KO\_LYMPHOID\_MULTIPOTENT\_PROGENITOR\_DN  
GSE15330\_WT\_VS\_IKAROS\_KO\_LYMPHOID\_MULTIPOTENT\_PROGENITOR\_DN  
138 -0.2227127 -0.9085108 0.66988415  
0.73543817 1 1361 "tags=13%, list=10%, signal=14%"  
GSE24492\_LYVE\_NEG\_VS\_POS\_MACROPHAGE\_DN  
GSE24492\_LYVE\_NEG\_VS\_POS\_MACROPHAGE\_DN  
139 -0.22353783 -0.9071511 0.70321363  
0.73883057 1 2446 "tags=21%, list=17%, signal=25%"  
GSE8621\_UNSTIM\_VS\_LPS\_PRIMED\_UNSTIM\_MACROPHAGE\_UP  
GSE8621\_UNSTIM\_VS\_LPS\_PRIMED\_UNSTIM\_MACROPHAGE\_UP  
149 -0.22021124 -0.90627 0.6959847 0.7408996  
1 3036 "tags=26%, list=22%, signal=32%"  
GSE360\_T\_GONDII\_VS\_M\_TUBERCULOSIS\_MAC\_DN  
GSE360\_T\_GONDII\_VS\_M\_TUBERCULOSIS\_MAC\_DN

147 -0.22121516 -0.9060813 0.7048872  
0.74101967 1 1702 "tags=15%, list=12%, signal=17%"  
GSE3203\_WT\_VS\_IFNAR1\_KO\_INFLUENZA\_INFECTED\_LN\_BCELL\_UP  
GSE3203\_WT\_VS\_IFNAR1\_KO\_INFLUENZA\_INFECTED\_LN\_BCELL\_UP  
135 -0.22158407 -0.90484136 0.6928839  
0.7441031 1 2379 "tags=16%, list=17%, signal=19%"  
GSE43863\_NAIVE\_VS\_LY6C\_LOW\_CXCR5NEG\_CD4\_EFF\_TCELL\_D6\_LCMV\_UP  
GSE43863\_NAIVE\_VS\_LY6C\_LOW\_CXCR5NEG\_CD4\_EFF\_TCELL\_D6\_LCMV\_UP  
91 -0.2322021 -0.90412575 0.6582734  
0.7456494 1 3210 "tags=27%, list=23%, signal=35%"  
GSE22033\_WT\_VS\_PPARG\_KO\_MEF\_UP GSE22033\_WT\_VS\_PPARG\_KO\_MEF\_UP  
121 -0.223844 -0.9036483 0.68233085  
0.7466075 1 3832 "tags=31%, list=27%, signal=42%"  
GSE37605\_NOD\_VS\_C57BL6\_IRES\_GFP\_TREG\_UP  
GSE37605\_NOD\_VS\_C57BL6\_IRES\_GFP\_TREG\_UP  
118 -0.2251596 -0.90337634 0.6978417 0.746998  
1 2335 "tags=19%, list=17%, signal=23%"  
GSE21360\_NAIVE\_VS\_SECONDARY\_MEMORY\_CD8\_TCELL\_UP  
GSE21360\_NAIVE\_VS\_SECONDARY\_MEMORY\_CD8\_TCELL\_UP  
149 -0.21750316 -0.90206873 0.69274807 0.75014  
1 2215 "tags=17%, list=16%, signal=20%"  
GSE9316\_CD4\_TCELL\_BALBC\_VS\_TH17\_ENRI\_CD4\_TCELL\_SKG\_PMA\_IONO\_STIM\_FR4  
NEG\_DN  
GSE9316\_CD4\_TCELL\_BALBC\_VS\_TH17\_ENRI\_CD4\_TCELL\_SKG\_PMA\_IONO\_STIM\_FR4  
NEG\_DN 142 -0.22010769 -0.9009359 0.734375  
0.7528951 1 1976 "tags=19%, list=14%, signal=22%"  
GSE26928\_NAIVE\_VS\_CXCR5\_POS\_CD4\_TCELL\_UP  
GSE26928\_NAIVE\_VS\_CXCR5\_POS\_CD4\_TCELL\_UP  
120 -0.22688381 -0.90092444 0.7029703  
0.7525443 1 2256 "tags=18%, list=16%, signal=22%"  
GSE46606\_IRF4MID\_VS\_WT\_CD40L\_IL2\_IL5\_DAY3\_STIMULATED\_BCELL\_UP  
GSE46606\_IRF4MID\_VS\_WT\_CD40L\_IL2\_IL5\_DAY3\_STIMULATED\_BCELL\_UP  
142 -0.22002432 -0.900271 0.68725866  
0.75398606 1 1573 "tags=15%, list=11%, signal=17%"  
GSE36888\_STAT5\_AB\_KNOCKIN\_VS\_WT\_TCELL\_IL2\_TREATED\_17H\_DN  
GSE36888\_STAT5\_AB\_KNOCKIN\_VS\_WT\_TCELL\_IL2\_TREATED\_17H\_DN  
145 -0.21795142 -0.90017873 0.69942194  
0.75386906 1 1545 "tags=13%, list=11%, signal=15%"  
GSE32034\_UNTREATED\_VS\_ROSIGLIZATONE\_TREATED\_LY6C\_LOW\_MONOCYTE\_DN  
GSE32034\_UNTREATED\_VS\_ROSIGLIZATONE\_TREATED\_LY6C\_LOW\_MONOCYTE\_DN  
117 -0.22614902 -0.9001012 0.6826004  
0.7537041 1 4270 "tags=33%, list=30%, signal=47%"  
GSE17721\_POLYIC\_VS\_GARDIQUIMOD\_12H\_BMDC\_UP  
GSE17721\_POLYIC\_VS\_GARDIQUIMOD\_12H\_BMDC\_UP  
147 -0.2166872 -0.89896333 0.70233464  
0.75648177 1 1797 "tags=14%, list=13%, signal=15%"  
GSE22601\_IMMATURE\_CD4\_SINGLE\_POSITIVE\_VS\_DOUBLE\_POSITIVE\_THYMOCYTE\_U  
P  
GSE22601\_IMMATURE\_CD4\_SINGLE\_POSITIVE\_VS\_DOUBLE\_POSITIVE\_THYMOCYTE\_U  
P 105 -0.23015158 -0.89827853  
0.6969112 0.75798416 1 5914 "tags=47%,  
list=42%, signal=80%"  
GSE27670\_CTRL\_VS\_BLIMP1\_TRANSDUCEDC\_GC\_BCELL\_UP  
GSE27670\_CTRL\_VS\_BLIMP1\_TRANSDUCEDC\_GC\_BCELL\_UP

162 -0.21216647 -0.89786446 0.743295 0.7587318  
1 2257 "tags=17%, list=16%, signal=20%"  
GSE13887\_ACT\_CD4\_VS\_NO\_TREATED\_CD4\_TCELL\_DN  
GSE13887\_ACT\_CD4\_VS\_NO\_TREATED\_CD4\_TCELL\_DN  
96 -0.23324333 -0.8976279 0.68421054  
0.7589838 1 2309 "tags=16%, list=16%, signal=19%"  
GSE25088\_ROSIGLITAZONE\_VS\_IL4\_AND\_ROSIGLITAZONE\_STIM\_MACROPHAGE\_DAY1  
0\_DN  
GSE25088\_ROSIGLITAZONE\_VS\_IL4\_AND\_ROSIGLITAZONE\_STIM\_MACROPHAGE\_DAY1  
0\_DN 144 -0.2179811 -0.8975347  
0.7101728 0.7588612 1 1282 "tags=13%,  
list=9%, signal=14%"  
GSE8835\_CD4\_VS\_CD8\_TCELL\_DN GSE8835\_CD4\_VS\_CD8\_TCELL\_DN  
139 -0.21698809 -0.89723974 0.7337278  
0.7593051 1 4494 "tags=35%, list=32%, signal=51%"  
GSE24634\_NAIVE\_CD4\_TCELL\_VS\_DAY10\_IL4\_CONV\_TREG\_UP  
GSE24634\_NAIVE\_CD4\_TCELL\_VS\_DAY10\_IL4\_CONV\_TREG\_UP  
131 -0.2181194 -0.8969407 0.70857143  
0.75971043 1 1528 "tags=15%, list=11%, signal=16%"  
GSE2706\_LPS\_VS\_R848\_AND\_LPS\_2H\_STIM\_DC\_DN  
GSE2706\_LPS\_VS\_R848\_AND\_LPS\_2H\_STIM\_DC\_DN  
98 -0.22942641 -0.8962232 0.6891386  
0.7612845 1 4433 "tags=36%, list=31%, signal=52%"  
GSE22886\_TH1\_VS\_TH2\_12H\_ACT\_DN GSE22886\_TH1\_VS\_TH2\_12H\_ACT\_DN  
132 -0.21982248 -0.8946201 0.7191919  
0.76525646 1 2182 "tags=15%, list=15%, signal=18%"  
GSE19923\_WT\_VS\_E2A\_KO\_DP\_THYMOCYTE\_UP  
GSE19923\_WT\_VS\_E2A\_KO\_DP\_THYMOCYTE\_UP  
170 -0.2131952 -0.8939974 0.765873 0.76649815  
1 1236 "tags=13%, list=9%, signal=14%"  
GSE37605\_TREG\_VS\_TCONV\_C57BL6\_FOXP3\_FUSION\_GFP\_UP  
GSE37605\_TREG\_VS\_TCONV\_C57BL6\_FOXP3\_FUSION\_GFP\_UP  
101 -0.22922903 -0.89366007 0.6802218  
0.76704854 1 2247 "tags=16%, list=16%, signal=19%"  
GSE25123\_WT\_VS\_PPARG\_KO\_MACROPHAGE\_ROSIGLITAZONE\_STIM\_DN  
GSE25123\_WT\_VS\_PPARG\_KO\_MACROPHAGE\_ROSIGLITAZONE\_STIM\_DN  
113 -0.22179165 -0.89296925 0.71789885  
0.76851153 1 2193 "tags=18%, list=16%, signal=21%"  
GSE1925\_CTRL\_VS\_IFNG\_PRIMED\_MACROPHAGE\_3H\_IFNG\_STIM\_DN  
GSE1925\_CTRL\_VS\_IFNG\_PRIMED\_MACROPHAGE\_3H\_IFNG\_STIM\_DN  
94 -0.2306852 -0.8923137 0.6859345  
0.76983285 1 981 "tags=9%, list=7%, signal=9%"  
GSE1566\_WT\_VS\_EZH2\_KO\_LN\_TCELL\_UP GSE1566\_WT\_VS\_EZH2\_KO\_LN\_TCELL\_UP  
117 -0.22414869 -0.8919772 0.6829746  
0.77032447 1 598 "tags=7%, list=4%, signal=7%"  
GSE339\_CD4POS\_VS\_CD4CD8DN\_DC\_IN\_CULTURE\_UP  
GSE339\_CD4POS\_VS\_CD4CD8DN\_DC\_IN\_CULTURE\_UP  
156 -0.21575181 -0.89112157 0.7538168  
0.7721872 1 3761 "tags=28%, list=27%, signal=38%"  
GSE36888\_STAT5\_AB\_KNOCKIN\_VS\_WT\_TCELL\_IL2\_TREATED\_2H\_DN  
GSE36888\_STAT5\_AB\_KNOCKIN\_VS\_WT\_TCELL\_IL2\_TREATED\_2H\_DN  
132 -0.21910106 -0.8908802 0.71794873  
0.7724295 1 1250 "tags=14%, list=9%, signal=15%"  
GSE6259\_DEC205\_POS\_DC\_VS\_CD8\_TCELL\_DN

GSE6259\_DEC205\_POS\_DC\_VS\_CD8\_TCELL\_DN  
118 -0.22199853 -0.89050883 0.7243948  
0.7730576 1 2803 "tags=21%, list=20%, signal=26%"  
GSE24210\_IL35\_TREATED\_VS\_UNTREATED\_TCONV\_CD4\_TCELL\_DN  
GSE24210\_IL35\_TREATED\_VS\_UNTREATED\_TCONV\_CD4\_TCELL\_DN  
150 -0.21275161 -0.88841814 0.7642726  
0.77827007 1 2910 "tags=23%, list=21%, signal=29%"  
GSE11367\_CTRL\_VS\_IL17\_TREATED\_SMOOTH\_MUSCLE\_CELL\_DN  
GSE11367\_CTRL\_VS\_IL17\_TREATED\_SMOOTH\_MUSCLE\_CELL\_DN  
86 -0.23259725 -0.88751984 0.7100372  
0.7802435 1 733 "tags=10%, list=5%, signal=11%"  
GSE13485\_DAY1\_VS\_DAY3\_YF17D\_VACCINE\_PBMC\_UP  
GSE13485\_DAY1\_VS\_DAY3\_YF17D\_VACCINE\_PBMC\_UP  
101 -0.22638428 -0.88664246 0.72088355  
0.7821078 1 5352 "tags=43%, list=38%, signal=68%"  
GSE22589\_HIV\_VS\_HIV\_AND\_SIV\_INFECTED\_DC\_DN  
GSE22589\_HIV\_VS\_HIV\_AND\_SIV\_INFECTED\_DC\_DN  
128 -0.21969563 -0.8860965 0.7308448  
0.7831167 1 4389 "tags=36%, list=31%, signal=52%"  
GSE2706\_R848\_VS\_R848\_AND\_LPS\_2H\_STIM\_DC\_UP  
GSE2706\_R848\_VS\_R848\_AND\_LPS\_2H\_STIM\_DC\_UP  
103 -0.22325458 -0.8857534 0.6780952  
0.7836271 1 3058 "tags=28%, list=22%, signal=36%"  
GSE26488\_CTRL\_VS\_PEPTIDE\_INJECTION\_OT2\_THYMOCYTE\_UP  
GSE26488\_CTRL\_VS\_PEPTIDE\_INJECTION\_OT2\_THYMOCYTE\_UP  
102 -0.2241666 -0.88496226 0.72504705  
0.78526014 1 1948 "tags=16%, list=14%, signal=18%"  
GSE40666\_UNTREATED\_VS\_IFNA\_STIM\_CD8\_TCELL\_90MIN\_UP  
GSE40666\_UNTREATED\_VS\_IFNA\_STIM\_CD8\_TCELL\_90MIN\_UP  
97 -0.22399743 -0.8844269 0.72583824  
0.7863094 1 4184 "tags=31%, list=30%, signal=44%"  
GSE26023\_PHD3\_KO\_VS\_WT\_NEUTROPHIL\_HYPOXIA\_UP  
GSE26023\_PHD3\_KO\_VS\_WT\_NEUTROPHIL\_HYPOXIA\_UP  
155 -0.2138221 -0.8831538 0.74563104  
0.7892225 1 2598 "tags=21%, list=18%, signal=25%"  
GSE17721\_CTRL\_VS\_POLYIC\_0.5H\_BMDC\_DN  
GSE17721\_CTRL\_VS\_POLYIC\_0.5H\_BMDC\_DN  
168 -0.20935647 -0.8829324 0.7653061  
0.7893885 1 3599 "tags=27%, list=26%, signal=36%"  
GSE13485\_DAY3\_VS\_DAY7\_YF17D\_VACCINE\_PBMC\_UP  
GSE13485\_DAY3\_VS\_DAY7\_YF17D\_VACCINE\_PBMC\_UP  
106 -0.22715975 -0.88245255 0.7327273  
0.7902178 1 3025 "tags=25%, list=21%, signal=32%"  
GSE20715\_WT\_VS\_TLR4\_KO\_48H\_OZONE\_LUNG\_UP  
GSE20715\_WT\_VS\_TLR4\_KO\_48H\_OZONE\_LUNG\_UP  
158 -0.21117684 -0.88188875 0.78019804  
0.79131097 1 1990 "tags=17%, list=14%, signal=20%"  
GSE13547\_WT\_VS\_ZFX\_KO\_BCELL\_ANTI\_IGM\_STIM\_12H\_UP  
GSE13547\_WT\_VS\_ZFX\_KO\_BCELL\_ANTI\_IGM\_STIM\_12H\_UP  
113 -0.22258025 -0.8817759 0.7208413  
0.79120576 1 5811 "tags=43%, list=41%, signal=73%"  
GSE17721\_CTRL\_VS\_CPG\_12H\_BMDC\_DN GSE17721\_CTRL\_VS\_CPG\_12H\_BMDC\_DN  
158 -0.20962077 -0.87912726 0.7758945  
0.7976183 1 1022 "tags=10%, list=7%, signal=11%"

GSE17721\_CTRL\_VS\_GARDIQUIMOD\_2H\_BMDC\_DN  
GSE17721\_CTRL\_VS\_GARDIQUIMOD\_2H\_BMDC\_DN  
156 -0.21222106 -0.8787478 0.7590822  
0.79822975 1 3321 "tags=29%, list=24%, signal=38%"  
GSE2770\_IL12\_VS\_IL4\_TREATED\_ACT\_CD4\_TCELL\_2H\_DN  
GSE2770\_IL12\_VS\_IL4\_TREATED\_ACT\_CD4\_TCELL\_2H\_DN  
124 -0.21777 -0.8780447 0.7803468 0.7996157  
1 1542 "tags=13%, list=11%, signal=14%"  
GSE24972\_WT\_VS\_IRF8\_KO\_MARGINAL\_ZONE\_SPLEEN\_BCELL\_DN  
GSE24972\_WT\_VS\_IRF8\_KO\_MARGINAL\_ZONE\_SPLEEN\_BCELL\_DN  
127 -0.21595626 -0.87798905 0.77559054  
0.7993722 1 5368 "tags=41%, list=38%, signal=65%"  
GSE22935\_WT\_VS\_MYD88\_KO\_MACROPHAGE\_12H\_MBOVIS\_BCG\_STIM\_UP  
GSE22935\_WT\_VS\_MYD88\_KO\_MACROPHAGE\_12H\_MBOVIS\_BCG\_STIM\_UP  
147 -0.21378715 -0.8762883 0.734252 0.8032285  
1 1680 "tags=14%, list=12%, signal=15%"  
GSE9946\_IMMATURE\_VS\_PROSTAGLANDINE2\_TREATED\_MATURE\_DC\_UP  
GSE9946\_IMMATURE\_VS\_PROSTAGLANDINE2\_TREATED\_MATURE\_DC\_UP  
107 -0.22394171 -0.87549305 0.7348485  
0.80486727 1 2842 "tags=21%, list=20%, signal=27%"  
GSE33162\_HDAC3\_KO\_VS\_HDAC3\_KO\_4H\_LPS\_STIM\_MACROPHAGE\_DN  
GSE33162\_HDAC3\_KO\_VS\_HDAC3\_KO\_4H\_LPS\_STIM\_MACROPHAGE\_DN  
165 -0.20894434 -0.8741199 0.7556326  
0.8079242 1 3558 "tags=27%, list=25%, signal=35%"  
GSE3039\_ALPHAALPHA\_VS\_ALPHABETA\_CD8\_TCELL\_DN  
GSE3039\_ALPHAALPHA\_VS\_ALPHABETA\_CD8\_TCELL\_DN  
153 -0.2091883 -0.873218 0.7918149  
0.8097717 1 2174 "tags=18%, list=15%, signal=21%"  
GSE41867\_NAIVE\_VS\_DAY15\_LCMV\_CONE13\_EFFECTOR\_CD8\_TCELL\_UP  
GSE41867\_NAIVE\_VS\_DAY15\_LCMV\_CONE13\_EFFECTOR\_CD8\_TCELL\_UP  
100 -0.22774315 -0.8719187 0.74038464  
0.81254625 1 5053 "tags=43%, list=36%, signal=67%"  
GSE20198\_UNTREATED\_VS\_IL12\_IL18\_TREATED\_ACT\_CD4\_TCELL\_UP  
GSE20198\_UNTREATED\_VS\_IL12\_IL18\_TREATED\_ACT\_CD4\_TCELL\_UP  
136 -0.2129868 -0.8710891 0.7765151  
0.8141965 1 2584 "tags=21%, list=18%, signal=26%"  
GSE21927\_HEALTHY\_VS\_TUMOROUS\_BALBC\_MOUSE\_MONOCYTE\_DN  
GSE21927\_HEALTHY\_VS\_TUMOROUS\_BALBC\_MOUSE\_MONOCYTE\_DN  
90 -0.22943242 -0.8694345 0.76208895  
0.81785756 1 1223 "tags=8%, list=9%, signal=8%"  
GSE29618\_PRE\_VS\_DAY7\_POST\_TIV\_FLU\_VACCINE\_BCELL\_UP  
GSE29618\_PRE\_VS\_DAY7\_POST\_TIV\_FLU\_VACCINE\_BCELL\_UP  
152 -0.20708042 -0.8664717 0.8152381  
0.8245834 1 2827 "tags=19%, list=20%, signal=24%"  
GSE3982\_MAC\_VS\_NKCELL\_DN GSE3982\_MAC\_VS\_NKCELL\_DN  
134 -0.2101469 -0.86632794 0.7973231  
0.8245099 1 1873 "tags=17%, list=13%, signal=20%"  
GSE11961\_FOLLICULAR\_BCELL\_VS\_MARGINAL\_ZONE\_BCELL\_DN  
GSE11961\_FOLLICULAR\_BCELL\_VS\_MARGINAL\_ZONE\_BCELL\_DN  
150 -0.21035042 -0.86596775 0.80237156  
0.8250047 1 4503 "tags=34%, list=32%, signal=49%"  
GSE360\_L\_MAJOR\_VS\_T\_GONDII\_DC\_UP GSE360\_L\_MAJOR\_VS\_T\_GONDII\_DC\_UP  
134 -0.21293506 -0.86539894 0.7679558  
0.8259769 1 2133 "tags=14%, list=15%, signal=17%"

GSE18148\_CFBF\_KO\_VS\_WT\_TREG\_DN GSE18148\_CFBF\_KO\_VS\_WT\_TREG\_DN  
145 -0.20909567 -0.86508393 0.80265653  
0.826302 1 5150 "tags=39%, list=36%, signal=61%"  
GSE21927\_SPLENIC\_VS\_TUMOR\_MONOCYTES\_FROM\_C26GM\_TUMOROUS\_MICE\_BALBC\_U  
P  
GSE21927\_SPLENIC\_VS\_TUMOR\_MONOCYTES\_FROM\_C26GM\_TUMOROUS\_MICE\_BALBC\_U  
P  
118 -0.21443643 -0.86350995  
0.7906067 0.8296534 1 2402 "tags=20%,  
list=17%, signal=24%"  
GSE21033\_3H\_VS\_12H\_POLYIC\_STIM\_DC\_DN  
GSE21033\_3H\_VS\_12H\_POLYIC\_STIM\_DC\_DN  
110 -0.21809532 -0.8633202 0.7973485  
0.8296863 1 3598 "tags=27%, list=25%, signal=36%"  
GSE21670\_TGFB\_VS\_IL6\_TREATED\_CD4\_TCELL\_UP  
GSE21670\_TGFB\_VS\_IL6\_TREATED\_CD4\_TCELL\_UP  
131 -0.21207316 -0.86274445 0.7895717  
0.8306899 1 3977 "tags=27%, list=28%, signal=37%"  
GSE17974\_IL4\_AND\_ANTI\_IL12\_VS\_UNTREATED\_72H\_ACT\_CD4\_TCELL\_UP  
GSE17974\_IL4\_AND\_ANTI\_IL12\_VS\_UNTREATED\_72H\_ACT\_CD4\_TCELL\_UP  
109 -0.2189418 -0.86151266 0.7533719  
0.83324057 1 3601 "tags=32%, list=26%, signal=43%"  
GSE21063\_WT\_VS\_NFATC1\_KO\_16H\_ANTI\_IGM\_STIM\_BCELL\_DN  
GSE21063\_WT\_VS\_NFATC1\_KO\_16H\_ANTI\_IGM\_STIM\_BCELL\_DN  
115 -0.2173244 -0.8611209 0.77024484  
0.8337481 1 1766 "tags=15%, list=13%, signal=17%"  
GSE2770\_IL12\_AND\_TGFB\_VS\_IL4\_TREATED\_ACT\_CD4\_TCELL\_2H\_DN  
GSE2770\_IL12\_AND\_TGFB\_VS\_IL4\_TREATED\_ACT\_CD4\_TCELL\_2H\_DN  
125 -0.21146618 -0.860494 0.8 0.8348169  
1 2505 "tags=20%, list=18%, signal=24%"  
GSE18791\_UNSTIM\_VS\_NEWCATSLE\_VIRUS\_DC\_1H\_DN  
GSE18791\_UNSTIM\_VS\_NEWCATSLE\_VIRUS\_DC\_1H\_DN  
111 -0.21685319 -0.8587831 0.7924528  
0.8383397 1 1590 "tags=15%, list=11%, signal=17%"  
GSE22886\_NEUTROPHIL\_VS\_MONOCYTE\_UP  
GSE22886\_NEUTROPHIL\_VS\_MONOCYTE\_UP  
129 -0.21175924 -0.85856485 0.7918288  
0.8384667 1 4555 "tags=36%, list=32%, signal=53%"  
GSE28726\_NAIVE\_CD4\_TCELL\_VS\_NAIVE\_VA24NEG\_NKTCELL\_DN  
GSE28726\_NAIVE\_CD4\_TCELL\_VS\_NAIVE\_VA24NEG\_NKTCELL\_DN  
146 -0.21073566 -0.8567862 0.81409 0.8421002  
1 3155 "tags=23%, list=22%, signal=29%"  
GSE8515\_IL1\_VS\_IL6\_4H\_STIM\_MAC\_DN GSE8515\_IL1\_VS\_IL6\_4H\_STIM\_MAC\_DN  
132 -0.20832777 -0.85445195 0.8241966  
0.8470784 1 2954 "tags=21%, list=21%, signal=27%"  
GSE45365\_NK\_CELL\_VS\_CD11B\_DC\_UP GSE45365\_NK\_CELL\_VS\_CD11B\_DC\_UP  
136 -0.21063752 -0.8539066 0.822314  
0.84790075 1 3578 "tags=23%, list=25%, signal=30%"  
GSE17721\_CPG\_VS\_GARDIQUIMOD\_2H\_BMDC\_UP  
GSE17721\_CPG\_VS\_GARDIQUIMOD\_2H\_BMDC\_UP  
157 -0.20482144 -0.8537648 0.8352941  
0.8477952 1 1938 "tags=15%, list=14%, signal=18%"  
GSE2128\_CTRL\_VS\_MIMETOPE\_NEGATIVE\_SELECTION\_DP\_THYMOCYTE\_NOD\_DN  
GSE2128\_CTRL\_VS\_MIMETOPE\_NEGATIVE\_SELECTION\_DP\_THYMOCYTE\_NOD\_DN  
115 -0.21577698 -0.8533772 0.8125

0.8482239 1 3218 "tags=25%, list=23%, signal=32%"  
GSE17974\_0H\_VS\_0.5H\_IN\_VITRO\_ACT\_CD4\_TCELL\_UP  
GSE17974\_0H\_VS\_0.5H\_IN\_VITRO\_ACT\_CD4\_TCELL\_UP  
110 -0.21466307 -0.8532867 0.77203065  
0.84800845 1 1533 "tags=11%, list=11%, signal=12%"  
GSE22527\_ANTI\_CD3\_INVIVO\_VS\_UNTREATED\_MOUSE\_TREG\_UP  
GSE22527\_ANTI\_CD3\_INVIVO\_VS\_UNTREATED\_MOUSE\_TREG\_UP  
150 -0.20377257 -0.8515139 0.8431772 0.851531  
1 1051 "tags=10%, list=7%, signal=11%"  
GSE45365\_HEALTHY\_VS\_MCMV\_INFECTION\_CD11B\_DC\_UP  
GSE45365\_HEALTHY\_VS\_MCMV\_INFECTION\_CD11B\_DC\_UP  
113 -0.21304443 -0.84865165 0.82608694  
0.85740876 1 3267 "tags=23%, list=23%, signal=30%"  
GSE29614\_CTRL\_VS\_DAY3\_TIV\_FLU\_VACCINE\_PBMC\_UP  
GSE29614\_CTRL\_VS\_DAY3\_TIV\_FLU\_VACCINE\_PBMC\_UP  
100 -0.2192383 -0.8434375 0.8064516  
0.86805284 1 5174 "tags=41%, list=37%, signal=64%"  
GSE9946\_LISTERIA\_INF\_MATURE\_VS\_PROSTAGLANDINE2\_TREATED\_MATURE\_DC\_DN  
GSE9946\_LISTERIA\_INF\_MATURE\_VS\_PROSTAGLANDINE2\_TREATED\_MATURE\_DC\_DN  
85 -0.22426693 -0.8434107 0.765748  
0.86768913 1 3871 "tags=29%, list=27%, signal=40%"  
GSE17721\_POLYIC\_VS\_CPG\_0.5H\_BMDC\_UP  
GSE17721\_POLYIC\_VS\_CPG\_0.5H\_BMDC\_UP  
144 -0.20349865 -0.841997 0.8574007  
0.8702774 1 4794 "tags=40%, list=34%, signal=59%"  
GSE32423\_CTRL\_VS\_IL7\_MEMORY\_CD8\_TCELL\_UP  
GSE32423\_CTRL\_VS\_IL7\_MEMORY\_CD8\_TCELL\_UP  
142 -0.20445642 -0.8401311 0.8407767  
0.8737517 1 4326 "tags=33%, list=31%, signal=47%"  
GSE29618\_LAIV\_VS\_TIV\_FLU\_VACCINE\_DAY7\_MDC\_DN  
GSE29618\_LAIV\_VS\_TIV\_FLU\_VACCINE\_DAY7\_MDC\_DN  
141 -0.20662323 -0.8386887 0.86050725 0.876237  
1 2760 "tags=23%, list=20%, signal=28%"  
GSE3203\_INFLUENZA\_INF\_VS\_IFNB\_TREATED\_LN\_BCELL\_UP  
GSE3203\_INFLUENZA\_INF\_VS\_IFNB\_TREATED\_LN\_BCELL\_UP  
152 -0.20123757 -0.8385363 0.8693069  
0.8761231 1 2559 "tags=16%, list=18%, signal=20%"  
GSE16385\_UNTREATED\_VS\_12H\_IL4\_TREATED\_MACROPHAGE\_DN  
GSE16385\_UNTREATED\_VS\_12H\_IL4\_TREATED\_MACROPHAGE\_DN  
135 -0.20593795 -0.83851546 0.8596491  
0.8757405 1 2959 "tags=23%, list=21%, signal=29%"  
GSE36392\_TYPE\_2\_MYELOID\_VS\_MAC\_IL25\_TREATED\_LUNG\_UP  
GSE36392\_TYPE\_2\_MYELOID\_VS\_MAC\_IL25\_TREATED\_LUNG\_UP  
149 -0.19987425 -0.8381888 0.87666035  
0.8759828 1 3926 "tags=29%, list=28%, signal=40%"  
GSE17974\_IL4\_AND\_ANTI\_IL12\_VS\_UNTREATED\_48H\_ACT\_CD4\_TCELL\_UP  
GSE17974\_IL4\_AND\_ANTI\_IL12\_VS\_UNTREATED\_48H\_ACT\_CD4\_TCELL\_UP  
119 -0.2095944 -0.83795345 0.82472324  
0.87601805 1 1667 "tags=16%, list=12%, signal=18%"  
GSE41176\_WT\_VS\_TAK1\_KO\_UNSTIM\_BCELL\_UP  
GSE41176\_WT\_VS\_TAK1\_KO\_UNSTIM\_BCELL\_UP  
134 -0.20633851 -0.83723855 0.85265225  
0.87703395 1 1349 "tags=11%, list=10%, signal=12%"  
GSE22601\_DOUBLE\_NEGATIVE\_VS\_DOUBLE\_POSITIVE\_THYMOCYTE\_UP



GSE22601\_DOUBLE\_NEGATIVE\_VS\_DOUBLE\_POSITIVE\_THYMOCYTE\_UP  
120 -0.20558639 -0.83563197 0.84139264  
0.87984425 1 1516 "tags=13%, list=11%, signal=14%"  
GSE21546\_UNSTIM\_VS\_ANTI\_CD3\_STIM\_SAP1A\_KO\_AND\_ELK1\_KO\_DP\_THYMOCYTES\_DN  
GSE21546\_UNSTIM\_VS\_ANTI\_CD3\_STIM\_SAP1A\_KO\_AND\_ELK1\_KO\_DP\_THYMOCYTES\_DN  
87 -0.21978338 -0.83500767  
0.8089669 0.8806743 1 6060 "tags=52%, list=43%, signal=90%"  
GSE7460\_CTRL\_VS\_FOXP3\_OVEREXPR\_TCONV\_UP  
GSE7460\_CTRL\_VS\_FOXP3\_OVEREXPR\_TCONV\_UP  
136 -0.20633942 -0.8349377 0.8593156  
0.8803959 1 655 "tags=6%, list=5%, signal=6%"  
GSE34156\_NOD2\_LIGAND\_VS\_NOD2\_AND\_TLR1\_TLR2\_LIGAND\_24H\_TREATED\_MONOCYTE\_UP  
GSE34156\_NOD2\_LIGAND\_VS\_NOD2\_AND\_TLR1\_TLR2\_LIGAND\_24H\_TREATED\_MONOCYTE\_UP  
121 -0.2094237 -0.8316517  
0.8797595 0.88645035 1 1304 "tags=10%, list=9%, signal=11%"  
GSE16450\_CTRL\_VS\_IFNA\_12H\_STIM\_MATURE\_NEURON\_CELL\_LINE\_UP  
GSE16450\_CTRL\_VS\_IFNA\_12H\_STIM\_MATURE\_NEURON\_CELL\_LINE\_UP  
135 -0.20309998 -0.82971936 0.87202924  
0.8897577 1 4347 "tags=32%, list=31%, signal=46%"  
GSE6259\_DEC205\_POS\_DC\_VS\_BCELL\_UP GSE6259\_DEC205\_POS\_DC\_VS\_BCELL\_UP  
128 -0.20397303 -0.8289255 0.8731618  
0.8908646 1 4141 "tags=26%, list=29%, signal=36%"  
GSE22033\_UNTREATED\_VS\_ROSIGLITAZONE\_TREATED\_MEF\_DN  
GSE22033\_UNTREATED\_VS\_ROSIGLITAZONE\_TREATED\_MEF\_DN  
134 -0.20342676 -0.82859194 0.8763441  
0.89107263 1 1796 "tags=15%, list=13%, signal=17%"  
GSE7459\_UNTREATED\_VS\_IL6\_TREATED\_ACT\_CD4\_TCELL\_UP  
GSE7459\_UNTREATED\_VS\_IL6\_TREATED\_ACT\_CD4\_TCELL\_UP  
108 -0.20708695 -0.82859105 0.8451243  
0.89064664 1 4899 "tags=41%, list=35%, signal=62%"  
GSE46606\_DAY1\_VS\_DAY3\_CD40L\_IL2\_IL5\_STIMULATED\_IRF4MID\_BCELL\_UP  
GSE46606\_DAY1\_VS\_DAY3\_CD40L\_IL2\_IL5\_STIMULATED\_IRF4MID\_BCELL\_UP  
152 -0.19679981 -0.82661635 0.8844697  
0.89387625 1 2901 "tags=20%, list=21%, signal=25%"  
GSE23308\_CTRL\_VS\_CORTICOSTERONE\_TREATED\_MACROPHAGE\_UP  
GSE23308\_CTRL\_VS\_CORTICOSTERONE\_TREATED\_MACROPHAGE\_UP  
155 -0.19657715 -0.82066023 0.8857678  
0.9041597 1 1138 "tags=9%, list=8%, signal=10%"  
GSE13887\_HEALTHY\_VS\_LUPUS\_RESTING\_CD4\_TCELL\_DN  
GSE13887\_HEALTHY\_VS\_LUPUS\_RESTING\_CD4\_TCELL\_DN  
85 -0.21401925 -0.81650424 0.8464351  
0.9108834 1 2974 "tags=26%, list=21%, signal=33%"  
GSE29618\_PRE\_VS\_DAY7\_POST\_TIV\_FLU\_VACCINE\_MONOCYTE\_UP  
GSE29618\_PRE\_VS\_DAY7\_POST\_TIV\_FLU\_VACCINE\_MONOCYTE\_UP  
127 -0.19850858 -0.8153041 0.9019608  
0.91252583 1 3237 "tags=23%, list=23%, signal=29%"  
GSE34156\_UNTREATED\_VS\_24H\_NOD2\_AND\_TLR1\_TLR2\_LIGAND\_TREATED\_MONOCYTE\_DN  
GSE34156\_UNTREATED\_VS\_24H\_NOD2\_AND\_TLR1\_TLR2\_LIGAND\_TREATED\_MONOCYTE\_DN  
96 -0.20850329 -0.81525433

0.86460346      0.91217977      1      2934      "tags=22%,  
list=21%, signal=27%"  
GSE40274\_EOS\_VS\_FOXP3\_AND\_EOS\_TRANSDUCED\_ACTIVATED\_CD4\_TCELL\_DN  
GSE40274\_EOS\_VS\_FOXP3\_AND\_EOS\_TRANSDUCED\_ACTIVATED\_CD4\_TCELL\_DN  
93      -0.20919271      -0.81269      0.8613281  
0.9159439      1      3092      "tags=25%, list=22%, signal=31%"  
GSE11961\_MEMORY\_BCELL\_DAY7\_VS\_MEMORY\_BCELL\_DAY40\_UP  
GSE11961\_MEMORY\_BCELL\_DAY7\_VS\_MEMORY\_BCELL\_DAY40\_UP  
142      -0.19864307      -0.8087066      0.8878676  
0.92190015      1      2091      "tags=18%, list=15%, signal=20%"  
GSE15767\_MED\_VS\_SCS\_MAC\_LN\_UP      GSE15767\_MED\_VS\_SCS\_MAC\_LN\_UP  
155      -0.19437589      -0.8078987      0.91783565  
0.92274034      1      3952      "tags=29%, list=28%, signal=40%"  
GSE13485\_PRE\_VS\_POST\_YF17D\_VACCINATION\_PBMC\_UP  
GSE13485\_PRE\_VS\_POST\_YF17D\_VACCINATION\_PBMC\_UP  
119      -0.20120087      -0.80668545      0.9055118  
0.92424685      1      2184      "tags=17%, list=15%, signal=20%"  
GSE45365\_BCELL\_VS\_CD8\_TCELL\_DN      GSE45365\_BCELL\_VS\_CD8\_TCELL\_DN  
107      -0.20431525      -0.80628914      0.86278194  
0.92443454      1      4648      "tags=37%, list=33%, signal=55%"  
GSE5589\_LPS\_AND\_IL10\_VS\_LPS\_AND\_IL6\_STIM\_IL10\_KO\_MACROPHAGE\_45MIN\_DN  
  
GSE5589\_LPS\_AND\_IL10\_VS\_LPS\_AND\_IL6\_STIM\_IL10\_KO\_MACROPHAGE\_45MIN\_DN  
148      -0.1961528      -0.80592954  
0.9138577      0.9245499      1      3979      "tags=30%,  
list=28%, signal=41%"  
GSE18281\_PERIMEDULLARY\_CORTICAL\_REGION\_VS\_WHOLE\_CORTEX\_THYMUS\_DN  
GSE18281\_PERIMEDULLARY\_CORTICAL\_REGION\_VS\_WHOLE\_CORTEX\_THYMUS\_DN  
143      -0.19606467      -0.80549496      0.90909094  
0.92478335      1      2936      "tags=22%, list=21%, signal=28%"  
GSE9006\_TYPE\_1\_DIABETES\_AT\_DX\_VS\_1MONTH\_POST\_DX\_PBMC\_DN  
GSE9006\_TYPE\_1\_DIABETES\_AT\_DX\_VS\_1MONTH\_POST\_DX\_PBMC\_DN  
135      -0.19456692      -0.79890585      0.9298246  
0.93405104      1      3693      "tags=29%, list=26%, signal=39%"  
GSE7218\_UNSTIM\_VS\_ANTIGEN\_STIM\_THROUGH\_IGM\_BCELL\_DN  
GSE7218\_UNSTIM\_VS\_ANTIGEN\_STIM\_THROUGH\_IGM\_BCELL\_DN  
98      -0.20341612      -0.7988638      0.8740458  
0.93366814      1      2409      "tags=19%, list=17%, signal=23%"  
GSE4142\_PLASMA\_CELL\_VS\_GC\_BCELL\_UP  
GSE4142\_PLASMA\_CELL\_VS\_GC\_BCELL\_UP  
134      -0.19492729      -0.7933548      0.922      0.9407581  
1      3697      "tags=30%, list=26%, signal=40%"  
GSE33374\_CD8\_ALPHAALPHA\_VS\_ALPHABETA\_CD161\_HIGH\_TCELL\_UP  
GSE33374\_CD8\_ALPHAALPHA\_VS\_ALPHABETA\_CD161\_HIGH\_TCELL\_UP  
166      -0.18706845      -0.7888824      0.95194083      0.94614  
1      3139      "tags=21%, list=22%, signal=27%"  
GSE16385\_ROSIGLITAZONE\_VS\_UNTREATED\_IFNG\_TNF\_STIM\_MACROPHAGE\_UP  
GSE16385\_ROSIGLITAZONE\_VS\_UNTREATED\_IFNG\_TNF\_STIM\_MACROPHAGE\_UP  
147      -0.19023392      -0.78824604      0.9161905  
0.9464893      1      3296      "tags=25%, list=23%, signal=32%"  
GSE7459\_UNTREATED\_VS\_IL6\_TREATED\_ACT\_CD4\_TCELL\_DN  
GSE7459\_UNTREATED\_VS\_IL6\_TREATED\_ACT\_CD4\_TCELL\_DN  
112      -0.19651039      -0.786832      0.9082031  
0.9478095      1      1961      "tags=19%, list=14%, signal=22%"

|                                                                      |                                                                      |             |                                  |                                  |
|----------------------------------------------------------------------|----------------------------------------------------------------------|-------------|----------------------------------|----------------------------------|
| GSE12505_WT_VS_E2_2_HET_PDC_UP                                       | GSE12505_WT_VS_E2_2_HET_PDC_UP                                       |             |                                  |                                  |
| 102                                                                  | -0.20162448                                                          | -0.78563887 | 0.9042357                        |                                  |
| 0.9488328                                                            | 1                                                                    | 4347        | "tags=30%, list=31%, signal=44%" |                                  |
| GSE18281_PERIMEDULLARY_CORTICAL_REGION_VS_WHOLE_MEDULLA_THYMUS_UP    | GSE18281_PERIMEDULLARY_CORTICAL_REGION_VS_WHOLE_MEDULLA_THYMUS_UP    |             |                                  |                                  |
| 146                                                                  | -0.1905889                                                           | -0.7838161  | 0.9510358                        |                                  |
| 0.95061165                                                           | 1                                                                    | 1569        | "tags=11%, list=11%, signal=12%" |                                  |
| GSE46606_UNSTIM_VS_CD40L_IL2_IL5_3DAY_STIMULATED_IRF4_KO_BCELL_UP    | GSE46606_UNSTIM_VS_CD40L_IL2_IL5_3DAY_STIMULATED_IRF4_KO_BCELL_UP    |             |                                  |                                  |
| 94                                                                   | -0.20253836                                                          | -0.7829601  | 0.8820225                        |                                  |
| 0.95115376                                                           | 1                                                                    | 4684        | "tags=32%, list=33%, signal=47%" |                                  |
| GSE3203_HEALTHY_VS_INFLUENZA_INFECTED_LN_BCELL_DN                    | GSE3203_HEALTHY_VS_INFLUENZA_INFECTED_LN_BCELL_DN                    |             |                                  |                                  |
| 136                                                                  | -0.19077645                                                          | -0.78039247 | 0.9203036                        |                                  |
| 0.95369095                                                           | 1                                                                    | 4065        | "tags=29%, list=29%, signal=40%" |                                  |
| GSE12003_4D_VS_8D_CULTURE_MIR223_KO_BM_PROGENITOR_UP                 | GSE12003_4D_VS_8D_CULTURE_MIR223_KO_BM_PROGENITOR_UP                 |             |                                  |                                  |
| 115                                                                  | -0.1933463                                                           | -0.7786941  | 0.9175824                        |                                  |
| 0.95515347                                                           | 1                                                                    | 2702        | "tags=20%, list=19%, signal=25%" |                                  |
| GSE37301_RAG2_KO_VS_RAG2_AND_ETS1_KO_NK_CELL_DN                      | GSE37301_RAG2_KO_VS_RAG2_AND_ETS1_KO_NK_CELL_DN                      |             |                                  |                                  |
| 152                                                                  | -0.18845354                                                          | -0.7782241  | 0.9539347                        |                                  |
| 0.9552481                                                            | 1                                                                    | 2243        | "tags=18%, list=16%, signal=21%" |                                  |
| GSE45365_NK_CELL_VS_CD8A_DC_DN                                       | GSE45365_NK_CELL_VS_CD8A_DC_DN                                       |             |                                  |                                  |
| 142                                                                  | -0.19102463                                                          | -0.77626383 | 0.9365942                        |                                  |
| 0.95694035                                                           | 1                                                                    | 4792        | "tags=35%, list=34%, signal=53%" |                                  |
| GSE27092_WT_VS_HDAC7_PHOSPHO_DEFICIENT_CD8_TCELL_UP                  | GSE27092_WT_VS_HDAC7_PHOSPHO_DEFICIENT_CD8_TCELL_UP                  |             |                                  |                                  |
| 169                                                                  | -0.18606974                                                          | -0.7759046  | 0.96374047                       |                                  |
| 0.9568615                                                            | 1                                                                    | 2950        | "tags=20%, list=21%, signal=25%" |                                  |
| GSE23502_BM_VS_COLON_TUMOR_HDC_KO_MYELOID_DERIVED_SUPPRESSOR_CELL_UP | GSE23502_BM_VS_COLON_TUMOR_HDC_KO_MYELOID_DERIVED_SUPPRESSOR_CELL_UP |             |                                  |                                  |
|                                                                      | 132                                                                  | -0.19129671 | -0.7747708                       |                                  |
| 0.92460316                                                           | 0.95761675                                                           | 1           | 4005                             | "tags=30%, list=28%, signal=41%" |
| GSE13522_CTRL_VS_T_CRUZI_BRAZIL_STRAIN_INF_SKIN_UP                   | GSE13522_CTRL_VS_T_CRUZI_BRAZIL_STRAIN_INF_SKIN_UP                   |             |                                  |                                  |
| 106                                                                  | -0.19869724                                                          | -0.7746795  | 0.91369605                       |                                  |
| 0.95725936                                                           | 1                                                                    | 2517        | "tags=18%, list=18%, signal=22%" |                                  |
| GSE41176_UNSTIM_VS_ANTI_IGM_STIM_TAK1_KO_BCELL_1H_DN                 | GSE41176_UNSTIM_VS_ANTI_IGM_STIM_TAK1_KO_BCELL_1H_DN                 |             |                                  |                                  |
| 140                                                                  | -0.18405415                                                          | -0.7593534  | 0.9530075                        |                                  |
| 0.9713231                                                            | 1                                                                    | 4553        | "tags=34%, list=32%, signal=50%" |                                  |
| GSE35543_IN_VIVO_NTREG_VS_IN_VITRO_ITREG_UP                          | GSE35543_IN_VIVO_NTREG_VS_IN_VITRO_ITREG_UP                          |             |                                  |                                  |
| 140                                                                  | -0.18360125                                                          | -0.7577559  | 0.95849055                       |                                  |
| 0.97224206                                                           | 1                                                                    | 4966        | "tags=38%, list=35%, signal=58%" |                                  |
| GSE22025_UNTREATED_VS_TGFB1_AND_PROGESTERONE_TREATED_CD4_TCELL_UP    | GSE22025_UNTREATED_VS_TGFB1_AND_PROGESTERONE_TREATED_CD4_TCELL_UP    |             |                                  |                                  |
| 159                                                                  | -0.17952253                                                          | -0.75465494 | 0.9587426                        |                                  |
| 0.97424793                                                           | 1                                                                    | 938         | "tags=8%, list=7%, signal=8%"    |                                  |
| GSE4142_NAIVE_VS_MEMORY_BCELL_DN                                     | GSE4142_NAIVE_VS_MEMORY_BCELL_DN                                     |             |                                  |                                  |
| 139                                                                  | -0.1852499                                                           | -0.75445044 | 0.9559387                        |                                  |

0.97395647 1 3004 "tags=19%, list=21%, signal=24%"  
GSE13887\_RESTING\_VS\_ACT\_CD4\_TCELL\_UP  
GSE13887\_RESTING\_VS\_ACT\_CD4\_TCELL\_UP  
69 -0.20599985 -0.7488752 0.9166667  
0.97765076 1 5525 "tags=41%, list=39%, signal=66%"  
GSE46606\_UNSTIM\_VS\_CD40L\_IL2\_IL5\_1DAY\_STIMULATED\_IRF4HIGH\_SORTED\_BCE  
LL\_UP  
GSE46606\_UNSTIM\_VS\_CD40L\_IL2\_IL5\_1DAY\_STIMULATED\_IRF4HIGH\_SORTED\_BCE  
LL\_UP 146 -0.17987539 -0.7482301  
0.9756098 0.9776409 1 4220 "tags=28%,  
list=30%, signal=40%"  
GSE21380\_NON\_TFH\_VS\_GERMINAL\_CENTER\_TFH\_CD4\_TCELL\_UP  
GSE21380\_NON\_TFH\_VS\_GERMINAL\_CENTER\_TFH\_CD4\_TCELL\_UP  
148 -0.18136021 -0.74767286 0.9613153  
0.97757095 1 3871 "tags=27%, list=27%, signal=37%"  
GSE19888\_ADENOSINE\_A3R\_INH\_VS\_ACT\_WITH\_INHIBITOR\_PRETREATMENT\_IN\_MAS  
T\_CELL\_DN  
GSE19888\_ADENOSINE\_A3R\_INH\_VS\_ACT\_WITH\_INHIBITOR\_PRETREATMENT\_IN\_MAS  
T\_CELL\_DN 146 -0.18038781 -0.74654067  
0.980916 0.9779101 1 1582 "tags=11%, list=11%,  
signal=12%"  
GSE24814\_STAT5\_KO\_VS\_WT\_PRE\_BCELL\_UP  
GSE24814\_STAT5\_KO\_VS\_WT\_PRE\_BCELL\_UP  
145 -0.17903565 -0.7441626 0.98839456  
0.97905207 1 5541 "tags=43%, list=39%, signal=71%"  
GSE15930\_STIM\_VS\_STIM\_AND\_IL12\_72H\_CD8\_T\_CELL\_DN  
GSE15930\_STIM\_VS\_STIM\_AND\_IL12\_72H\_CD8\_T\_CELL\_DN  
164 -0.1742915 -0.7379195 0.9868668  
0.9823974 1 4580 "tags=32%, list=32%, signal=47%"  
GSE10094\_LCMV\_VS\_LISTERIA\_IND\_EFF\_CD4\_TCELL\_DN  
GSE10094\_LCMV\_VS\_LISTERIA\_IND\_EFF\_CD4\_TCELL\_DN  
142 -0.17891344 -0.737574 0.972167 0.9821277  
1 1159 "tags=8%, list=8%, signal=8%"  
GSE40666\_WT\_VS\_STAT4\_KO\_CD8\_TCELL\_UP  
GSE40666\_WT\_VS\_STAT4\_KO\_CD8\_TCELL\_UP  
112 -0.18340245 -0.73295027 0.95619047  
0.98428196 1 3213 "tags=21%, list=23%, signal=28%"  
GSE5589\_WT\_VS\_IL10\_KO\_LPS\_AND\_IL6\_STIM\_MACROPHAGE\_45MIN\_UP  
GSE5589\_WT\_VS\_IL10\_KO\_LPS\_AND\_IL6\_STIM\_MACROPHAGE\_45MIN\_UP  
139 -0.18118496 -0.73231435 0.9830508  
0.9841556 1 4287 "tags=31%, list=30%, signal=44%"  
GSE6259\_33D1\_POS\_DC\_VS\_CD8\_TCELL\_UP  
GSE6259\_33D1\_POS\_DC\_VS\_CD8\_TCELL\_UP  
102 -0.18604335 -0.73208714 0.957935 0.9838159  
1 5382 "tags=47%, list=38%, signal=76%"  
GSE28737\_WT\_VS\_BCL6\_KO\_MARGINAL\_ZONE\_BCELL\_UP  
GSE28737\_WT\_VS\_BCL6\_KO\_MARGINAL\_ZONE\_BCELL\_UP  
134 -0.17967814 -0.729679 0.97551787  
0.98462456 1 3812 "tags=27%, list=27%, signal=36%"  
GSE14413\_UNSTIM\_VS\_IFNB\_STIM\_RAW264\_CELLS\_UP  
GSE14413\_UNSTIM\_VS\_IFNB\_STIM\_RAW264\_CELLS\_UP  
93 -0.18374951 -0.7090829 0.97307694  
0.9928444 1 3223 "tags=23%, list=23%, signal=29%"  
GSE13306\_TREG\_RA\_VS\_TCONV\_RA\_DN GSE13306\_TREG\_RA\_VS\_TCONV\_RA\_DN

|                                                                      |                                  |                                  |                                  |                               |   |   |
|----------------------------------------------------------------------|----------------------------------|----------------------------------|----------------------------------|-------------------------------|---|---|
|                                                                      | 151                              | -0.17076957                      | -0.70867383                      | 0.98703706                    |   |   |
| 0.99250424                                                           | 1                                | 5101                             | "tags=36%, list=36%, signal=56%" |                               |   |   |
| GSE360_L_DONOVANI_VS_T_GONDII_DC_UP                                  |                                  |                                  |                                  |                               |   |   |
| GSE360_L_DONOVANI_VS_T_GONDII_DC_UP                                  |                                  |                                  |                                  |                               |   |   |
| 142                                                                  | -0.17049739                      | -0.700875                        | 0.98846155                       |                               |   |   |
| 0.99438924                                                           | 1                                | 2028                             | "tags=13%, list=14%, signal=15%" |                               |   |   |
| GSE10147_IL3_AND_HIVP17_VS_IL3_AND_CPG_STIM_PDC_UP                   |                                  |                                  |                                  |                               |   |   |
| GSE10147_IL3_AND_HIVP17_VS_IL3_AND_CPG_STIM_PDC_UP                   |                                  |                                  |                                  |                               |   |   |
| 119                                                                  | -0.17258148                      | -0.6980499                       | 0.9846449                        |                               |   |   |
| 0.9947107                                                            | 1                                | 5578                             | "tags=45%, list=40%, signal=73%" |                               |   |   |
| GSE19888_CTRL_VS_A3R_ACTIVATION_MAST_CELL_DN                         |                                  |                                  |                                  |                               |   |   |
| GSE19888_CTRL_VS_A3R_ACTIVATION_MAST_CELL_DN                         |                                  |                                  |                                  |                               |   |   |
| 130                                                                  | -0.17205955                      | -0.69525015                      | 0.9961165                        |                               |   |   |
| 0.9949672                                                            | 1                                | 6035                             | "tags=49%, list=43%, signal=85%" |                               |   |   |
| GSE17721_0.5H_VS_4H_LPS_BMDC_DN                                      |                                  |                                  |                                  |                               |   |   |
| GSE17721_0.5H_VS_4H_LPS_BMDC_DN                                      |                                  |                                  |                                  |                               |   |   |
|                                                                      | 157                              | -0.16709991                      | -0.69454396                      | 0.99614644                    |   |   |
| 0.9946798                                                            | 1                                | 2377                             | "tags=15%, list=17%, signal=18%" |                               |   |   |
| GSE13762_CTRL_VS_125_VITAMIND_DAY5_DC_UP                             |                                  |                                  |                                  |                               |   |   |
| GSE13762_CTRL_VS_125_VITAMIND_DAY5_DC_UP                             |                                  |                                  |                                  |                               |   |   |
| 97                                                                   | -0.17522098                      | -0.68107176                      | 0.98526704                       |                               |   |   |
| 0.9970947                                                            | 1                                | 3570                             | "tags=22%, list=25%, signal=29%" |                               |   |   |
| GSE15750_WT_VS_TRAF6KO_DAY10_EFF_CD8_TCELL_DN                        |                                  |                                  |                                  |                               |   |   |
| GSE15750_WT_VS_TRAF6KO_DAY10_EFF_CD8_TCELL_DN                        |                                  |                                  |                                  |                               |   |   |
| 143                                                                  | -0.16448598                      | -0.67628247                      | 0.9906015                        |                               |   |   |
| 0.9974378                                                            | 1                                | 5018                             | "tags=36%, list=36%, signal=55%" |                               |   |   |
| GSE7568_CTRL_VS_24H_TGFB_TREATED_MACROPHAGES_WITH_IL4_AND_DEXAMETHAS |                                  |                                  |                                  |                               |   |   |
| ONE_DN                                                               |                                  |                                  |                                  |                               |   |   |
| GSE7568_CTRL_VS_24H_TGFB_TREATED_MACROPHAGES_WITH_IL4_AND_DEXAMETHAS |                                  |                                  |                                  |                               |   |   |
| ONE_DN                                                               |                                  |                                  |                                  |                               |   |   |
| 0.99809885                                                           | 0.99911815                       | 1                                | 368                              | "tags=3%, list=3%, signal=4%" |   |   |
| GSE2585_AIRE_KO_VS_WT_CD80_LOW_MTEC_UP                               |                                  |                                  |                                  |                               |   |   |
| GSE2585_AIRE_KO_VS_WT_CD80_LOW_MTEC_UP                               |                                  |                                  |                                  |                               |   |   |
| 129                                                                  | -0.15680331                      | -0.6382708                       | 1                                | 1                             | 1 |   |
| 2875                                                                 | "tags=16%, list=20%, signal=19%" |                                  |                                  |                               |   |   |
| GSE41176_UNSTIM_VS_ANTI_IGM_STIM_TAK1_KO_BCELL_3H_UP                 |                                  |                                  |                                  |                               |   |   |
| GSE41176_UNSTIM_VS_ANTI_IGM_STIM_TAK1_KO_BCELL_3H_UP                 |                                  |                                  |                                  |                               |   |   |
| 130                                                                  | -0.14871539                      | -0.60909206                      | 1                                | 1                             | 1 |   |
| 3974                                                                 | "tags=25%, list=28%, signal=35%" |                                  |                                  |                               |   |   |
| GSE27786_BCELL_VS_ERYTHROBLAST_DN                                    |                                  |                                  |                                  |                               |   |   |
| GSE27786_BCELL_VS_ERYTHROBLAST_DN                                    |                                  |                                  |                                  |                               |   |   |
|                                                                      | 151                              | -0.14667778                      | -0.6060053                       | 1                             | 1 |   |
| 1                                                                    | 4005                             | "tags=25%, list=28%, signal=34%" |                                  |                               |   |   |
| GSE37605_TREG_VS_TCONV_C57BL6_FOXP3_IRES_GFP_UP                      |                                  |                                  |                                  |                               |   |   |
| GSE37605_TREG_VS_TCONV_C57BL6_FOXP3_IRES_GFP_UP                      |                                  |                                  |                                  |                               |   |   |
| 96                                                                   | -0.14757884                      | -0.5692266                       | 0.9980916                        |                               |   | 1 |
| 1                                                                    | 6046                             | "tags=45%, list=43%, signal=78%" |                                  |                               |   |   |
| GSE18791_UNSTIM_VS_NEWCATSLE_VIRUS_DC_2H_UP                          |                                  |                                  |                                  |                               |   |   |
| GSE18791_UNSTIM_VS_NEWCATSLE_VIRUS_DC_2H_UP                          |                                  |                                  |                                  |                               |   |   |
| 107                                                                  | -0.12452007                      | -0.48570925                      | 1                                | 0.9999984                     |   |   |
| 1                                                                    | 5168                             | "tags=32%, list=37%, signal=50%" |                                  |                               |   |   |
